# Supplementary material for: A Robust and Universal Metaproteomics Workflow for Research Studies and Routine Diagnostics Within 24 h Using Phenol Extraction, FASP Digest, and the MetaProteomeAnalyzer
Source: Front Microbiol. 2019 Aug 16;10:1883. doi: 10.3389/fmicb.2019.01883 (PMC6707425; doi:10.3389/fmicb.2019.01883)
Supplement: TABLE S5 — Taxonomic annotation. [file Table_5.XLSX]

## Sheet: DESCRIPTION
General description
This file contains the analysis of taxonomies for the data, comparing taxonomic annotation for MPAv1 and MPAv2
Overview table sheets
Table	Content
COPY Raw TAX MPAv1	Copy from supplementary table 5, Taxonomy list of all 54 result datasets obtained with MPA v1.08
COPY Raw TAX MPAv2	Copy from supplementary table 5, Taxonomy list of all 54 result datasets obtained with MPA v2.12
TaxCount Spectra v1	Spectral count of unique metaprotein taxonomies for MPAv1.08, used to create 2 figures in table sheet "Figure Taxonomy by Spectral count"
TaxCount Spectra v2	Spectral count of unique metaprotein taxonomies for MPAv2.12 , used to create 2 figures in table sheet "Figure Taxonomy by Spectral count"
FIGURE Taxonomy Spectral count	Contains a figure based on the taxonomic annotation by spectral count
Table sheet description/legend
COPY Raw TAX MPAv1 + COPY Raw TAX MPAv2
These table sheets are a copy of the imported data from Supplmentare File 6, which is the basis for this analysis
These table sheets contains the list of unique metaprotein taxonomies for all samples for MPAv1.08 and MPAv2.12 respectively
Column	Description
Content	Automatically created during import
Name	Name created during import, references origin file
Custom.Meta-Protein No.	Metaprotein Number set by MPA
Custom.Meta-Protein Accession	Accession of this metaprotein
Custom.Meta-Protein Description	Description of this metaprotein, either as from FASTA file of origin or Annotation obtained via BLAST
Custom.Meta-Protein Taxonomy	Final Taxonomy of this metaprotein, based on LCA of its protein members
Custom.Peptide Count	Non-redundant peptide count for this metaprotein
Custom.Spectral Count	Non-redundant spectral count for this metaprotein
Custom.Proteins	List of protein accessions for this metaprotein
Custom.Peptides	List of peptide sequences for this metaprotein
Custom.	Automatically created during import
Custom.filename	File this metaprotein originates from
TaxCount Spectra v1 + TaxCount Spectra v2
These tables contain the spectral count of taxonomies for each rank
Each Row represents a unique metaprotein taxonomy found in a sample and displays the taxonomy tree as far as it was assigned
Unassigned taxonomy (at a rank) are marked as "Unkown"
Subtables in columns M-AC contain the cumulative sum for individual taxonomies at each rank, i.e. how often does "Archaea" occur in Superkingdom column
Column	Description
Name	The file (sample) of origin for this taxonomy
Superkingdom	The taxonomy at rank Superkingdom, if not known is set to "Unknown Superkingdom"
Kingdom	The taxonomy at rank Kingdom if not known is set to "Unknown Kingdom"
Phylum	The taxonomy at rank Phylum if not known is set to "Unknown Phylum"
Order	The taxonomy at rank Order if not known is set to "Unknown Order"
Class	The taxonomy at rank Class if not known is set to "Unknown Class"
Family	The taxonomy at rank Family if not known is set to "Unknown Family"
Genus	The taxonomy at rank Genus if not known is set to "Unknown Genus"
Species	The taxonomy at rank Species if not known is set to "Unknown Species"
Subspecies	The taxonomy at rank Subspecies if not known is set to "Unknown Subspecies"
No. Peptides	Number of peptides assigned with this taxonomy
Spectral Count (Krona)	Number of spectra for this taxonomy
FIGURE Taxonomy Spectral count
This table summarizes the spectral counts from "TaxCount Spectra v1" and "TaxCount Spectra v2" and calculates the % of spectral counts for known taxonomies
This figure displays a comparison between MPAv1 and MPAv2 for the relative amount (percantage) of spectral counts for taxonomic annotations compared to all spectra with assigned taxonomy
Column	Description
Taxonomic Level	Taxonomic rank this row refers to, i.e. Superkingdom, species, etc
%Spectra v1	Percantage of spectra with assigned taxonomy at each rank for MPAv1.08 as calculated in subtable
%Spectra v2	Percantage of spectra with assigned taxonomy at each rank for MPAv2.12 as calculated in subtable
Second Subtable
This subtable copies the values from "TaxCount Spectra v1" and "TaxCount Spectra v2" and calculates the percantage which is used in the main table

## Sheet: COPY Raw TAX MPAv1
Content	Name	Custom.Unclassified	Custom.Superkingdom	Custom.Kingdom	Custom.Phylum	Custom.Class	Custom.Order	Custom.Family	Custom.Genus	Custom.Species	Custom.Subspecies	Custom.No. Peptides	Custom.Spectral Count (Krona)	Custom.	Custom.filename
	TaxMP_MPAv1_NewWF_BGP_1_A.csv		Unknown Superkingdom	Unknown Kingdom	Unknown Phylum	Unknown Class	Unknown Order	Unknown Family	Unknown Genus	Unknown Species	Unknown Subspecies	4149	10139		TaxMP_MPAv1_NewWF_BGP_1_A.csv
	TaxMP_MPAv1_NewWF_BGP_1_A.csv		Bacteria	Unknown Kingdom	Proteobacteria	Gammaproteobacteria	Alteromonadales	Shewanellaceae	Shewanella	Shewanella oneidensis	Shewanella oneidensis MR-1	1	1		TaxMP_MPAv1_NewWF_BGP_1_A.csv
	TaxMP_MPAv1_NewWF_BGP_1_A.csv		Bacteria	Unknown Kingdom	Actinobacteria	Actinobacteria	Rubrobacterales	Rubrobacteraceae	Rubrobacter	Rubrobacter xylanophilus	Rubrobacter xylanophilus DSM 9941	1	1		TaxMP_MPAv1_NewWF_BGP_1_A.csv
	TaxMP_MPAv1_NewWF_BGP_1_A.csv		Bacteria	Unknown Kingdom	Unknown Phylum	Unknown Class	Unknown Order	Unknown Family	Unknown Genus	Unknown Species	Unknown Subspecies	6	7		TaxMP_MPAv1_NewWF_BGP_1_A.csv
	TaxMP_MPAv1_NewWF_BGP_1_A.csv		Bacteria	Unknown Kingdom	Actinobacteria	Actinobacteria	Actinomycetales	Mycobacteriaceae	Mycobacterium	Mycobacterium tuberculosis	Mycobacterium tuberculosis H37Rv	1	1		TaxMP_MPAv1_NewWF_BGP_1_A.csv
	TaxMP_MPAv1_NewWF_BGP_1_A.csv		Bacteria	Unknown Kingdom	Proteobacteria	Gammaproteobacteria	Enterobacteriales	Enterobacteriaceae	Wigglesworthia	Wigglesworthia glossinidia	Wigglesworthia glossinidia endosymbiont of Glossina brevipalpis	1	1		TaxMP_MPAv1_NewWF_BGP_1_A.csv
	TaxMP_MPAv1_NewWF_BGP_1_A.csv		Bacteria	Unknown Kingdom	Bacteroidetes	Bacteroidia	Bacteroidales	Bacteroidaceae	Bacteroides	Bacteroides thetaiotaomicron	Bacteroides thetaiotaomicron VPI-5482	1	2		TaxMP_MPAv1_NewWF_BGP_1_A.csv
	TaxMP_MPAv1_NewWF_BGP_1_A.csv		Eukaryota	Viridiplantae	Streptophyta	Liliopsida	Poales	Poaceae	Oryza	Oryza sativa	Oryza sativa Japonica Group	3	18		TaxMP_MPAv1_NewWF_BGP_1_A.csv
	TaxMP_MPAv1_NewWF_BGP_1_A.csv		Bacteria	Unknown Kingdom	Cyanobacteria	Unknown Class	Nostocales	Nostocaceae	Nostoc	Nostoc sp. PCC 7120	Unknown Subspecies	1	3		TaxMP_MPAv1_NewWF_BGP_1_A.csv
	TaxMP_MPAv1_NewWF_BGP_1_A.csv		Archaea	Unknown Kingdom	Euryarchaeota	Methanomicrobia	Methanosarcinales	Methanosarcinaceae	Methanosarcina	Methanosarcina acetivorans	Methanosarcina acetivorans C2A	1	1		TaxMP_MPAv1_NewWF_BGP_1_A.csv
	TaxMP_MPAv1_NewWF_BGP_1_A.csv		Bacteria	Unknown Kingdom	Firmicutes	Clostridia	Thermoanaerobacterales	Thermoanaerobacteraceae	Thermoanaerobacter	Thermoanaerobacter brockii	Unknown Subspecies	2	4		TaxMP_MPAv1_NewWF_BGP_1_A.csv
	TaxMP_MPAv1_NewWF_BGP_1_A.csv		Bacteria	Unknown Kingdom	Proteobacteria	Gammaproteobacteria	Pseudomonadales	Pseudomonadaceae	Pseudomonas	Pseudomonas fluorescens	Pseudomonas fluorescens SBW25	2	3		TaxMP_MPAv1_NewWF_BGP_1_A.csv
	TaxMP_MPAv1_NewWF_BGP_1_A.csv		Eukaryota	Unknown Kingdom	Unknown Phylum	Unknown Class	Dictyosteliida	Unknown Family	Dictyostelium	Dictyostelium discoideum	Unknown Subspecies	1	2		TaxMP_MPAv1_NewWF_BGP_1_A.csv
	TaxMP_MPAv1_NewWF_BGP_1_A.csv		Bacteria	Unknown Kingdom	Proteobacteria	Betaproteobacteria	Burkholderiales	Comamonadaceae	Acidovorax	Acidovorax sp. JS42	Unknown Subspecies	1	1		TaxMP_MPAv1_NewWF_BGP_1_A.csv
	TaxMP_MPAv1_NewWF_BGP_1_A.csv		Archaea	Unknown Kingdom	Euryarchaeota	Methanomicrobia	Methanomicrobiales	Methanomicrobiaceae	Methanoculleus	Methanoculleus marisnigri	Methanoculleus marisnigri JR1	2	3		TaxMP_MPAv1_NewWF_BGP_1_A.csv
	TaxMP_MPAv1_NewWF_BGP_1_A.csv		Eukaryota	Metazoa	Chordata	Actinopterygii	Cypriniformes	Cyprinidae	Danio	Danio rerio	Unknown Subspecies	1	1		TaxMP_MPAv1_NewWF_BGP_1_A.csv
	TaxMP_MPAv1_NewWF_BGP_1_A.csv		Bacteria	Unknown Kingdom	Firmicutes	Bacilli	Lactobacillales	Streptococcaceae	Streptococcus	Unknown Species	Unknown Subspecies	3	2		TaxMP_MPAv1_NewWF_BGP_1_A.csv
	TaxMP_MPAv1_NewWF_BGP_1_A.csv		Bacteria	Unknown Kingdom	Firmicutes	Clostridia	Clostridiales	Clostridiaceae	Clostridium	Clostridium perfringens	Clostridium perfringens str. 13	1	1		TaxMP_MPAv1_NewWF_BGP_1_A.csv
	TaxMP_MPAv1_NewWF_BGP_1_A.csv		Archaea	Unknown Kingdom	Euryarchaeota	Methanomicrobia	Methanosarcinales	Methanosarcinaceae	Methanosarcina	Unknown Species	Unknown Subspecies	20	70		TaxMP_MPAv1_NewWF_BGP_1_A.csv
	TaxMP_MPAv1_NewWF_BGP_1_A.csv		Bacteria	Unknown Kingdom	Proteobacteria	Gammaproteobacteria	Enterobacteriales	Enterobacteriaceae	Unknown Genus	Unknown Species	Unknown Subspecies	3	7		TaxMP_MPAv1_NewWF_BGP_1_A.csv
	TaxMP_MPAv1_NewWF_BGP_1_A.csv		Archaea	Unknown Kingdom	Euryarchaeota	Methanomicrobia	Methanosarcinales	Methanosarcinaceae	Methanosarcina	Methanosarcina thermophila	Unknown Subspecies	2	4		TaxMP_MPAv1_NewWF_BGP_1_A.csv
	TaxMP_MPAv1_NewWF_BGP_1_A.csv		Eukaryota	Metazoa	Chordata	Amphibia	Anura	Pipidae	Xenopus	Xenopus laevis	Unknown Subspecies	1	1		TaxMP_MPAv1_NewWF_BGP_1_A.csv
	TaxMP_MPAv1_NewWF_BGP_1_A.csv		Eukaryota	Viridiplantae	Streptophyta	Unknown Class	Unknown Order	Unknown Family	Unknown Genus	Unknown Species	Unknown Subspecies	5	9		TaxMP_MPAv1_NewWF_BGP_1_A.csv
	TaxMP_MPAv1_NewWF_BGP_1_A.csv		Bacteria	Unknown Kingdom	Firmicutes	Clostridia	Thermoanaerobacterales	Thermoanaerobacteraceae	Caldanaerobacter	Thermoanaerobacter tengcongensis MB4	Caldanaerobacter subterraneus subsp. tengcongensis	1	1		TaxMP_MPAv1_NewWF_BGP_1_A.csv
	TaxMP_MPAv1_NewWF_BGP_1_A.csv		Bacteria	Unknown Kingdom	Firmicutes	Clostridia	Clostridiales	Syntrophomonadaceae	Syntrophomonas	Syntrophomonas wolfei subsp. wolfei str. Goettingen	Syntrophomonas wolfei subsp. wolfei	1	1		TaxMP_MPAv1_NewWF_BGP_1_A.csv
	TaxMP_MPAv1_NewWF_BGP_1_A.csv		Eukaryota	Viridiplantae	Streptophyta	Liliopsida	Liliales	Liliaceae	Fritillaria	Fritillaria agrestis	Unknown Subspecies	1	1		TaxMP_MPAv1_NewWF_BGP_1_A.csv
	TaxMP_MPAv1_NewWF_BGP_1_A.csv		Bacteria	Unknown Kingdom	Proteobacteria	Alphaproteobacteria	Unknown Order	Unknown Family	Unknown Genus	Unknown Species	Unknown Subspecies	1	1		TaxMP_MPAv1_NewWF_BGP_1_A.csv
	TaxMP_MPAv1_NewWF_BGP_1_A.csv		Bacteria	Unknown Kingdom	Firmicutes	Clostridia	Unknown Order	Unknown Family	Unknown Genus	Unknown Species	Unknown Subspecies	1	1		TaxMP_MPAv1_NewWF_BGP_1_A.csv
	TaxMP_MPAv1_NewWF_BGP_1_A.csv		Bacteria	Unknown Kingdom	Firmicutes	Bacilli	Unknown Order	Unknown Family	Unknown Genus	Unknown Species	Unknown Subspecies	1	2		TaxMP_MPAv1_NewWF_BGP_1_A.csv
	TaxMP_MPAv1_NewWF_BGP_1_A.csv		Eukaryota	Fungi	Ascomycota	Saccharomycetes	Saccharomycetales	Saccharomycetaceae	Saccharomyces	Saccharomyces cerevisiae	Saccharomyces cerevisiae S288c	1	1		TaxMP_MPAv1_NewWF_BGP_1_A.csv
	TaxMP_MPAv1_NewWF_BGP_1_A.csv		Eukaryota	Metazoa	Chordata	Mammalia	Unknown Order	Bovidae	Bos	Bos taurus	Unknown Subspecies	1	1		TaxMP_MPAv1_NewWF_BGP_1_A.csv
	TaxMP_MPAv1_NewWF_BGP_1_A.csv		Eukaryota	Fungi	Basidiomycota	Agaricomycetes	Corticiales	Corticiaceae	Phanerochaete	Phanerochaete chrysosporium	Unknown Subspecies	1	1		TaxMP_MPAv1_NewWF_BGP_1_A.csv
	TaxMP_MPAv1_NewWF_BGP_1_A.csv		Archaea	Unknown Kingdom	Euryarchaeota	Methanomicrobia	Methanosarcinales	Methanosarcinaceae	Methanosarcina	Methanosarcina mazei	Methanosarcina mazei Go1	2	3		TaxMP_MPAv1_NewWF_BGP_1_A.csv
	TaxMP_MPAv1_NewWF_BGP_1_A.csv		Eukaryota	Metazoa	Arthropoda	Insecta	Diptera	Drosophilidae	Drosophila	Drosophila melanogaster	Unknown Subspecies	2	2		TaxMP_MPAv1_NewWF_BGP_1_A.csv
	TaxMP_MPAv1_NewWF_BGP_1_A.csv		Bacteria	Unknown Kingdom	Chloroflexi	Chloroflexi	Herpetosiphonales	Herpetosiphonaceae	Herpetosiphon	Herpetosiphon aurantiacus	Unknown Subspecies	1	1		TaxMP_MPAv1_NewWF_BGP_1_A.csv
	TaxMP_MPAv1_NewWF_BGP_1_A.csv		Eukaryota	Viridiplantae	Unknown Phylum	Unknown Class	Unknown Order	Unknown Family	Unknown Genus	Unknown Species	Unknown Subspecies	1	3		TaxMP_MPAv1_NewWF_BGP_1_A.csv
	TaxMP_MPAv1_NewWF_BGP_1_A.csv		Eukaryota	Unknown Kingdom	Unknown Phylum	Unknown Class	Unknown Order	Unknown Family	Unknown Genus	Unknown Species	Unknown Subspecies	3	4		TaxMP_MPAv1_NewWF_BGP_1_A.csv
	TaxMP_MPAv1_NewWF_BGP_1_A.csv		Bacteria	Unknown Kingdom	Proteobacteria	Unknown Class	Unknown Order	Unknown Family	Unknown Genus	Unknown Species	Unknown Subspecies	1	2		TaxMP_MPAv1_NewWF_BGP_1_A.csv
	TaxMP_MPAv1_NewWF_BGP_1_A.csv		Bacteria	Unknown Kingdom	Proteobacteria	Gammaproteobacteria	Enterobacteriales	Enterobacteriaceae	Proteus	Proteus mirabilis	Unknown Subspecies	1	1		TaxMP_MPAv1_NewWF_BGP_1_A.csv
	TaxMP_MPAv1_NewWF_BGP_1_A.csv		Bacteria	Unknown Kingdom	Firmicutes	Clostridia	Clostridiales	Clostridiaceae	Clostridium	Unknown Species	Unknown Subspecies	1	1		TaxMP_MPAv1_NewWF_BGP_1_A.csv
	TaxMP_MPAv1_NewWF_BGP_1_A.csv		Bacteria	Unknown Kingdom	Proteobacteria	Betaproteobacteria	Rhodocyclales	Rhodocyclaceae	Aromatoleum	Aromatoleum aromaticum	Aromatoleum aromaticum EbN1	1	1		TaxMP_MPAv1_NewWF_BGP_1_A.csv
	TaxMP_MPAv1_NewWF_BGP_1_A.csv		Bacteria	Unknown Kingdom	Firmicutes	Bacilli	Lactobacillales	Streptococcaceae	Streptococcus	Streptococcus mutans	Streptococcus mutans UA159	1	1		TaxMP_MPAv1_NewWF_BGP_1_A.csv
	TaxMP_MPAv1_NewWF_BGP_1_A.csv		Bacteria	Unknown Kingdom	Firmicutes	Unknown Class	Unknown Order	Unknown Family	Unknown Genus	Unknown Species	Unknown Subspecies	2	2		TaxMP_MPAv1_NewWF_BGP_1_A.csv
	TaxMP_MPAv1_NewWF_BGP_1_A.csv		Bacteria	Unknown Kingdom	Firmicutes	Clostridia	Clostridiales	Clostridiaceae	Clostridium	Clostridium botulinum	Clostridium botulinum E3 str. Alaska E43	1	1		TaxMP_MPAv1_NewWF_BGP_1_A.csv
	TaxMP_MPAv1_NewWF_BGP_1_A.csv		Bacteria	Unknown Kingdom	Proteobacteria	Betaproteobacteria	Burkholderiales	Burkholderiaceae	Ralstonia	Ralstonia solanacearum	Ralstonia solanacearum GMI1000	1	1		TaxMP_MPAv1_NewWF_BGP_1_A.csv
	TaxMP_MPAv1_NewWF_BGP_1_A.csv		Eukaryota	Metazoa	Nematoda	Chromadorea	Rhabditida	Rhabditidae	Caenorhabditis	Caenorhabditis briggsae	Unknown Subspecies	1	1		TaxMP_MPAv1_NewWF_BGP_1_A.csv
	TaxMP_MPAv1_NewWF_BGP_1_A.csv		Bacteria	Unknown Kingdom	Firmicutes	Clostridia	Clostridiales	Clostridiaceae	Clostridium	Clostridium perfringens	Unknown Subspecies	1	1		TaxMP_MPAv1_NewWF_BGP_1_A.csv
	TaxMP_MPAv1_NewWF_BGP_1_A.csv		Bacteria	Unknown Kingdom	Thermotogae	Thermotogae	Thermotogales	Thermotogaceae	Thermotoga	Thermotoga petrophila	Thermotoga petrophila RKU-1	1	1		TaxMP_MPAv1_NewWF_BGP_1_A.csv
	TaxMP_MPAv1_NewWF_BGP_1_A.csv		Eukaryota	Viridiplantae	Streptophyta	Liliopsida	Poales	Poaceae	Zea	Zea mays	Unknown Subspecies	6	56		TaxMP_MPAv1_NewWF_BGP_1_A.csv
	TaxMP_MPAv1_NewWF_BGP_1_A.csv		Bacteria	Unknown Kingdom	Proteobacteria	Betaproteobacteria	Burkholderiales	Unknown Family	Leptothrix	Leptothrix cholodnii	Leptothrix cholodnii SP-6	1	1		TaxMP_MPAv1_NewWF_BGP_1_A.csv
	TaxMP_MPAv1_NewWF_BGP_1_A.csv		Eukaryota	Fungi	Basidiomycota	Agaricomycetes	Unknown Order	Unknown Family	Unknown Genus	Unknown Species	Unknown Subspecies	1	2		TaxMP_MPAv1_NewWF_BGP_1_A.csv
	TaxMP_MPAv1_NewWF_BGP_1_A.csv		Eukaryota	Metazoa	Chordata	Mammalia	Unknown Order	Unknown Family	Unknown Genus	Unknown Species	Unknown Subspecies	1	2		TaxMP_MPAv1_NewWF_BGP_1_A.csv
	TaxMP_MPAv1_NewWF_BGP_1_A.csv		Bacteria	Unknown Kingdom	Firmicutes	Clostridia	Clostridiales	Clostridiaceae	Clostridium	Clostridium beijerinckii	Clostridium beijerinckii NCIMB 8052	1	2		TaxMP_MPAv1_NewWF_BGP_1_A.csv
	TaxMP_MPAv1_NewWF_BGP_1_A.csv		Bacteria	Unknown Kingdom	Deinococcus-Thermus	Deinococci	Deinococcales	Deinococcaceae	Deinococcus	Deinococcus deserti	Deinococcus deserti VCD115	1	1		TaxMP_MPAv1_NewWF_BGP_1_A.csv
	TaxMP_MPAv1_NewWF_BGP_1_A.csv		Bacteria	Unknown Kingdom	Actinobacteria	Actinobacteria	Actinomycetales	Propionibacteriaceae	Propionibacterium	Propionibacterium acnes	Propionibacterium acnes KPA171202	1	1		TaxMP_MPAv1_NewWF_BGP_1_A.csv
	TaxMP_MPAv1_NewWF_BGP_1_A.csv		Bacteria	Unknown Kingdom	Actinobacteria	Actinobacteria	Actinomycetales	Mycobacteriaceae	Mycobacterium	Mycobacterium leprae	Unknown Subspecies	1	2		TaxMP_MPAv1_NewWF_BGP_1_A.csv
	TaxMP_MPAv1_NewWF_BGP_1_A.csv		Bacteria	Unknown Kingdom	Firmicutes	Bacilli	Lactobacillales	Streptococcaceae	Lactococcus	Lactococcus lactis subsp. lactis Il1403	Lactococcus lactis subsp. lactis	1	2		TaxMP_MPAv1_NewWF_BGP_1_A.csv
	TaxMP_MPAv1_NewWF_BGP_1_A.csv		Archaea	Unknown Kingdom	Euryarchaeota	Methanobacteria	Methanobacteriales	Unknown Family	Unknown Genus	Unknown Species	Unknown Subspecies	3	5		TaxMP_MPAv1_NewWF_BGP_1_A.csv
	TaxMP_MPAv1_NewWF_BGP_1_A.csv		Bacteria	Unknown Kingdom	Proteobacteria	Alphaproteobacteria	Rhizobiales	Rhizobiaceae	Agrobacterium	Agrobacterium tumefaciens	Agrobacterium radiobacter K84	1	1		TaxMP_MPAv1_NewWF_BGP_1_A.csv
	TaxMP_MPAv1_NewWF_BGP_1_A.csv		Bacteria	Unknown Kingdom	Cyanobacteria	Unknown Class	Chroococcales	Unknown Family	Synechococcus	Synechococcus sp. CC9902	Unknown Subspecies	1	1		TaxMP_MPAv1_NewWF_BGP_1_A.csv
	TaxMP_MPAv1_NewWF_BGP_1_A.csv		Eukaryota	Viridiplantae	Streptophyta	Unknown Class	Brassicales	Brassicaceae	Arabidopsis	Arabidopsis thaliana	Unknown Subspecies	1	1		TaxMP_MPAv1_NewWF_BGP_1_A.csv
	TaxMP_MPAv1_NewWF_BGP_1_A.csv		Bacteria	Unknown Kingdom	Proteobacteria	Gammaproteobacteria	Xanthomonadales	Xanthomonadaceae	Xanthomonas	Xanthomonas campestris	Xanthomonas campestris pv. campestris str. B100	1	1		TaxMP_MPAv1_NewWF_BGP_1_A.csv
	TaxMP_MPAv1_NewWF_BGP_1_A.csv		Eukaryota	Fungi	Ascomycota	Eurotiomycetes	Onygenales	Unknown Family	Paracoccidioides	Paracoccidioides sp. 'lutzii'	Paracoccidioides sp. 'lutzii' Pb01	1	2		TaxMP_MPAv1_NewWF_BGP_1_A.csv
	TaxMP_MPAv1_NewWF_BGP_1_A.csv		Archaea	Unknown Kingdom	Euryarchaeota	Methanomicrobia	Methanosarcinales	Methanosaetaceae	Methanosaeta	Methanosaeta thermophila	Methanosaeta thermophila PT	1	1		TaxMP_MPAv1_NewWF_BGP_1_A.csv
	TaxMP_MPAv1_NewWF_BGP_1_A.csv		Bacteria	Unknown Kingdom	Actinobacteria	Actinobacteria	Actinomycetales	Nocardiaceae	Rhodococcus	Rhodococcus erythropolis	Rhodococcus erythropolis PR4	1	1		TaxMP_MPAv1_NewWF_BGP_1_A.csv
	TaxMP_MPAv1_NewWF_BGP_1_A.csv		Eukaryota	Viridiplantae	Streptophyta	Liliopsida	Poales	Poaceae	Unknown Genus	Unknown Species	Unknown Subspecies	1	4		TaxMP_MPAv1_NewWF_BGP_1_A.csv
	TaxMP_MPAv1_NewWF_BGP_1_B.csv		Unknown Superkingdom	Unknown Kingdom	Unknown Phylum	Unknown Class	Unknown Order	Unknown Family	Unknown Genus	Unknown Species	Unknown Subspecies	3847	9259		TaxMP_MPAv1_NewWF_BGP_1_B.csv
	TaxMP_MPAv1_NewWF_BGP_1_B.csv		Bacteria	Unknown Kingdom	Unknown Phylum	Unknown Class	Unknown Order	Unknown Family	Unknown Genus	Unknown Species	Unknown Subspecies	2	5		TaxMP_MPAv1_NewWF_BGP_1_B.csv
	TaxMP_MPAv1_NewWF_BGP_1_B.csv		Eukaryota	Metazoa	Chordata	Mammalia	Rodentia	Muridae	Rattus	Rattus norvegicus	Unknown Subspecies	2	2		TaxMP_MPAv1_NewWF_BGP_1_B.csv
	TaxMP_MPAv1_NewWF_BGP_1_B.csv		Bacteria	Unknown Kingdom	Proteobacteria	Gammaproteobacteria	Enterobacteriales	Enterobacteriaceae	Escherichia	Escherichia coli	Escherichia coli K-12	1	1		TaxMP_MPAv1_NewWF_BGP_1_B.csv
	TaxMP_MPAv1_NewWF_BGP_1_B.csv		Eukaryota	Metazoa	Chordata	Mammalia	Primates	Hominidae	Homo	Homo sapiens	Unknown Subspecies	1	1		TaxMP_MPAv1_NewWF_BGP_1_B.csv
	TaxMP_MPAv1_NewWF_BGP_1_B.csv		Bacteria	Unknown Kingdom	Bacteroidetes	Bacteroidia	Bacteroidales	Bacteroidaceae	Bacteroides	Bacteroides thetaiotaomicron	Bacteroides thetaiotaomicron VPI-5482	1	1		TaxMP_MPAv1_NewWF_BGP_1_B.csv
	TaxMP_MPAv1_NewWF_BGP_1_B.csv		Bacteria	Unknown Kingdom	Firmicutes	Bacilli	Lactobacillales	Enterococcaceae	Enterococcus	Enterococcus faecalis	Enterococcus faecalis V583	1	1		TaxMP_MPAv1_NewWF_BGP_1_B.csv
	TaxMP_MPAv1_NewWF_BGP_1_B.csv		Bacteria	Unknown Kingdom	Proteobacteria	Gammaproteobacteria	Chromatiales	Ectothiorhodospiraceae	Alkalilimnicola	Alkalilimnicola ehrlichii	Alkalilimnicola ehrlichii MLHE-1	1	1		TaxMP_MPAv1_NewWF_BGP_1_B.csv
	TaxMP_MPAv1_NewWF_BGP_1_B.csv		Eukaryota	Viridiplantae	Streptophyta	Liliopsida	Poales	Poaceae	Oryza	Oryza sativa	Oryza sativa Japonica Group	3	12		TaxMP_MPAv1_NewWF_BGP_1_B.csv
	TaxMP_MPAv1_NewWF_BGP_1_B.csv		Bacteria	Unknown Kingdom	Cyanobacteria	Unknown Class	Nostocales	Nostocaceae	Nostoc	Nostoc sp. PCC 7120	Unknown Subspecies	1	3		TaxMP_MPAv1_NewWF_BGP_1_B.csv
	TaxMP_MPAv1_NewWF_BGP_1_B.csv		Bacteria	Unknown Kingdom	Actinobacteria	Actinobacteria	Actinomycetales	Mycobacteriaceae	Mycobacterium	Mycobacterium leprae	Mycobacterium leprae Br4923	1	2		TaxMP_MPAv1_NewWF_BGP_1_B.csv
	TaxMP_MPAv1_NewWF_BGP_1_B.csv		Eukaryota	Unknown Kingdom	Unknown Phylum	Unknown Class	Dictyosteliida	Unknown Family	Dictyostelium	Dictyostelium discoideum	Unknown Subspecies	1	2		TaxMP_MPAv1_NewWF_BGP_1_B.csv
	TaxMP_MPAv1_NewWF_BGP_1_B.csv		Bacteria	Unknown Kingdom	Firmicutes	Bacilli	Lactobacillales	Streptococcaceae	Streptococcus	Unknown Species	Unknown Subspecies	3	4		TaxMP_MPAv1_NewWF_BGP_1_B.csv
	TaxMP_MPAv1_NewWF_BGP_1_B.csv		Archaea	Unknown Kingdom	Euryarchaeota	Methanomicrobia	Methanosarcinales	Methanosarcinaceae	Methanosarcina	Unknown Species	Unknown Subspecies	15	59		TaxMP_MPAv1_NewWF_BGP_1_B.csv
	TaxMP_MPAv1_NewWF_BGP_1_B.csv		Archaea	Unknown Kingdom	Euryarchaeota	Methanomicrobia	Methanosarcinales	Methanosarcinaceae	Methanosarcina	Methanosarcina barkeri	Unknown Subspecies	1	1		TaxMP_MPAv1_NewWF_BGP_1_B.csv
	TaxMP_MPAv1_NewWF_BGP_1_B.csv		Bacteria	Unknown Kingdom	Proteobacteria	Alphaproteobacteria	Rhizobiales	Bradyrhizobiaceae	Rhodopseudomonas	Rhodopseudomonas palustris	Rhodopseudomonas palustris CGA009	1	2		TaxMP_MPAv1_NewWF_BGP_1_B.csv
	TaxMP_MPAv1_NewWF_BGP_1_B.csv		Bacteria	Unknown Kingdom	Firmicutes	Clostridia	Clostridiales	Clostridiaceae	Clostridium	Clostridium botulinum	Clostridium botulinum A3 str. Loch Maree	1	2		TaxMP_MPAv1_NewWF_BGP_1_B.csv
	TaxMP_MPAv1_NewWF_BGP_1_B.csv		Eukaryota	Viridiplantae	Streptophyta	Unknown Class	Unknown Order	Unknown Family	Unknown Genus	Unknown Species	Unknown Subspecies	11	23		TaxMP_MPAv1_NewWF_BGP_1_B.csv
	TaxMP_MPAv1_NewWF_BGP_1_B.csv		Bacteria	Unknown Kingdom	Firmicutes	Bacilli	Bacillales	Bacillaceae	Bacillus	Bacillus halodurans	Bacillus halodurans C-125	1	1		TaxMP_MPAv1_NewWF_BGP_1_B.csv
	TaxMP_MPAv1_NewWF_BGP_1_B.csv		Bacteria	Unknown Kingdom	Firmicutes	Bacilli	Lactobacillales	Lactobacillaceae	Lactobacillus	Lactobacillus casei	Unknown Subspecies	1	1		TaxMP_MPAv1_NewWF_BGP_1_B.csv
	TaxMP_MPAv1_NewWF_BGP_1_B.csv		Archaea	Unknown Kingdom	Euryarchaeota	Methanococci	Methanococcales	Methanococcaceae	Methanococcus	Methanococcus vannielii	Methanococcus vannielii SB	1	1		TaxMP_MPAv1_NewWF_BGP_1_B.csv
	TaxMP_MPAv1_NewWF_BGP_1_B.csv		Bacteria	Unknown Kingdom	Firmicutes	Clostridia	Unknown Order	Unknown Family	Unknown Genus	Unknown Species	Unknown Subspecies	2	1		TaxMP_MPAv1_NewWF_BGP_1_B.csv
	TaxMP_MPAv1_NewWF_BGP_1_B.csv		Eukaryota	Fungi	Ascomycota	Saccharomycetes	Saccharomycetales	Saccharomycetaceae	Saccharomyces	Saccharomyces cerevisiae	Saccharomyces cerevisiae S288c	2	2		TaxMP_MPAv1_NewWF_BGP_1_B.csv
	TaxMP_MPAv1_NewWF_BGP_1_B.csv		Bacteria	Unknown Kingdom	Proteobacteria	Gammaproteobacteria	Enterobacteriales	Enterobacteriaceae	Escherichia	Escherichia fergusonii	Unknown Subspecies	1	1		TaxMP_MPAv1_NewWF_BGP_1_B.csv
	TaxMP_MPAv1_NewWF_BGP_1_B.csv		Bacteria	Unknown Kingdom	Firmicutes	Bacilli	Unknown Order	Unknown Family	Unknown Genus	Unknown Species	Unknown Subspecies	1	1		TaxMP_MPAv1_NewWF_BGP_1_B.csv
	TaxMP_MPAv1_NewWF_BGP_1_B.csv		Eukaryota	Metazoa	Mollusca	Bivalvia	Pterioida	Pteriidae	Pinctada	Pinctada margaritifera	Unknown Subspecies	1	1		TaxMP_MPAv1_NewWF_BGP_1_B.csv
	TaxMP_MPAv1_NewWF_BGP_1_B.csv		Archaea	Unknown Kingdom	Euryarchaeota	Methanobacteria	Methanobacteriales	Methanobacteriaceae	Methanothermobacter	Methanothermobacter marburgensis	Methanothermobacter marburgensis str. Marburg	1	1		TaxMP_MPAv1_NewWF_BGP_1_B.csv
	TaxMP_MPAv1_NewWF_BGP_1_B.csv		Eukaryota	Fungi	Basidiomycota	Ustilaginomycetes	Ustilaginales	Ustilaginaceae	Ustilago	Ustilago maydis	Ustilago maydis 521	1	1		TaxMP_MPAv1_NewWF_BGP_1_B.csv
	TaxMP_MPAv1_NewWF_BGP_1_B.csv		Eukaryota	Fungi	Ascomycota	Saccharomycetes	Saccharomycetales	Debaryomycetaceae	Scheffersomyces	Scheffersomyces stipitis	Scheffersomyces stipitis CBS 6054	1	1		TaxMP_MPAv1_NewWF_BGP_1_B.csv
	TaxMP_MPAv1_NewWF_BGP_1_B.csv		Bacteria	Unknown Kingdom	Proteobacteria	Alphaproteobacteria	Rickettsiales	Anaplasmataceae	Wolbachia	Wolbachia endosymbiont of Brugia malayi	Wolbachia endosymbiont strain TRS of Brugia malayi	1	1		TaxMP_MPAv1_NewWF_BGP_1_B.csv
	TaxMP_MPAv1_NewWF_BGP_1_B.csv		Bacteria	Unknown Kingdom	Firmicutes	Bacilli	Bacillales	Bacillaceae	Bacillus	Bacillus subtilis subsp. spizizenii str. W23	Bacillus subtilis subsp. spizizenii	1	1		TaxMP_MPAv1_NewWF_BGP_1_B.csv
	TaxMP_MPAv1_NewWF_BGP_1_B.csv		Eukaryota	Unknown Kingdom	Unknown Phylum	Unknown Class	Unknown Order	Unknown Family	Unknown Genus	Unknown Species	Unknown Subspecies	4	6		TaxMP_MPAv1_NewWF_BGP_1_B.csv
	TaxMP_MPAv1_NewWF_BGP_1_B.csv		Bacteria	Unknown Kingdom	Proteobacteria	Unknown Class	Unknown Order	Unknown Family	Unknown Genus	Unknown Species	Unknown Subspecies	2	2		TaxMP_MPAv1_NewWF_BGP_1_B.csv
	TaxMP_MPAv1_NewWF_BGP_1_B.csv		Bacteria	Unknown Kingdom	Proteobacteria	Alphaproteobacteria	Rickettsiales	Rickettsiaceae	Rickettsia	Rickettsia sibirica	Unknown Subspecies	1	1		TaxMP_MPAv1_NewWF_BGP_1_B.csv
	TaxMP_MPAv1_NewWF_BGP_1_B.csv		Bacteria	Unknown Kingdom	Firmicutes	Clostridia	Clostridiales	Clostridiaceae	Clostridium	Clostridium botulinum	Unknown Subspecies	2	2		TaxMP_MPAv1_NewWF_BGP_1_B.csv
	TaxMP_MPAv1_NewWF_BGP_1_B.csv		Bacteria	Unknown Kingdom	Firmicutes	Unknown Class	Unknown Order	Unknown Family	Unknown Genus	Unknown Species	Unknown Subspecies	4	3		TaxMP_MPAv1_NewWF_BGP_1_B.csv
	TaxMP_MPAv1_NewWF_BGP_1_B.csv		Archaea	Unknown Kingdom	Euryarchaeota	Thermoplasmata	Thermoplasmatales	Thermoplasmataceae	Thermoplasma	Thermoplasma volcanium	Thermoplasma volcanium GSS1	1	1		TaxMP_MPAv1_NewWF_BGP_1_B.csv
	TaxMP_MPAv1_NewWF_BGP_1_B.csv		Bacteria	Unknown Kingdom	Firmicutes	Clostridia	Clostridiales	Clostridiaceae	Clostridium	Clostridium botulinum	Clostridium botulinum E3 str. Alaska E43	1	1		TaxMP_MPAv1_NewWF_BGP_1_B.csv
	TaxMP_MPAv1_NewWF_BGP_1_B.csv		Bacteria	Unknown Kingdom	Chloroflexi	Dehalococcoidia	Dehalococcoidales	Dehalococcoidaceae	Dehalococcoides	Dehalococcoides mccartyi	Dehalococcoides ethenogenes 195	1	1		TaxMP_MPAv1_NewWF_BGP_1_B.csv
	TaxMP_MPAv1_NewWF_BGP_1_B.csv		Eukaryota	Viridiplantae	Streptophyta	Liliopsida	Poales	Poaceae	Zea	Zea mays	Unknown Subspecies	5	51		TaxMP_MPAv1_NewWF_BGP_1_B.csv
	TaxMP_MPAv1_NewWF_BGP_1_B.csv		Eukaryota	Fungi	Basidiomycota	Agaricomycetes	Unknown Order	Unknown Family	Unknown Genus	Unknown Species	Unknown Subspecies	1	1		TaxMP_MPAv1_NewWF_BGP_1_B.csv
	TaxMP_MPAv1_NewWF_BGP_1_B.csv		Eukaryota	Metazoa	Chordata	Mammalia	Unknown Order	Unknown Family	Unknown Genus	Unknown Species	Unknown Subspecies	1	3		TaxMP_MPAv1_NewWF_BGP_1_B.csv
	TaxMP_MPAv1_NewWF_BGP_1_B.csv		Bacteria	Unknown Kingdom	Proteobacteria	Gammaproteobacteria	Enterobacteriales	Enterobacteriaceae	Serratia	Unknown Species	Unknown Subspecies	1	3		TaxMP_MPAv1_NewWF_BGP_1_B.csv
	TaxMP_MPAv1_NewWF_BGP_1_B.csv		Bacteria	Unknown Kingdom	Firmicutes	Bacilli	Bacillales	Bacillaceae	Bacillus	Unknown Species	Unknown Subspecies	2	1		TaxMP_MPAv1_NewWF_BGP_1_B.csv
	TaxMP_MPAv1_NewWF_BGP_1_B.csv		Bacteria	Unknown Kingdom	Bacteroidetes	Flavobacteriia	Flavobacteriales	Flavobacteriaceae	Flavobacterium	Flavobacterium johnsoniae	Flavobacterium johnsoniae UW101	1	1		TaxMP_MPAv1_NewWF_BGP_1_B.csv
	TaxMP_MPAv1_NewWF_BGP_1_B.csv		Bacteria	Unknown Kingdom	Firmicutes	Bacilli	Lactobacillales	Streptococcaceae	Lactococcus	Lactococcus lactis subsp. lactis Il1403	Lactococcus lactis subsp. lactis	1	1		TaxMP_MPAv1_NewWF_BGP_1_B.csv
	TaxMP_MPAv1_NewWF_BGP_1_B.csv		Archaea	Unknown Kingdom	Euryarchaeota	Methanomicrobia	Methanomicrobiales	Methanocorpusculaceae	Methanocorpusculum	Methanocorpusculum labreanum	Methanocorpusculum labreanum Z	1	1		TaxMP_MPAv1_NewWF_BGP_1_B.csv
	TaxMP_MPAv1_NewWF_BGP_1_B.csv		Bacteria	Unknown Kingdom	Proteobacteria	Alphaproteobacteria	Rhizobiales	Methylobacteriaceae	Methylobacterium	Methylobacterium radiotolerans	Methylobacterium radiotolerans JCM 2831	1	1		TaxMP_MPAv1_NewWF_BGP_1_B.csv
	TaxMP_MPAv1_NewWF_BGP_1_B.csv		Bacteria	Unknown Kingdom	Actinobacteria	Actinobacteria	Actinomycetales	Unknown Family	Unknown Genus	Unknown Species	Unknown Subspecies	2	1		TaxMP_MPAv1_NewWF_BGP_1_B.csv
	TaxMP_MPAv1_NewWF_BGP_1_B.csv		Eukaryota	Viridiplantae	Streptophyta	Unknown Class	Brassicales	Brassicaceae	Arabidopsis	Arabidopsis thaliana	Unknown Subspecies	1	1		TaxMP_MPAv1_NewWF_BGP_1_B.csv
	TaxMP_MPAv1_NewWF_BGP_1_B.csv		Eukaryota	Viridiplantae	Streptophyta	Liliopsida	Poales	Poaceae	Unknown Genus	Unknown Species	Unknown Subspecies	1	4		TaxMP_MPAv1_NewWF_BGP_1_B.csv
	TaxMP_MPAv1_NewWF_BGP_1_C.csv		Unknown Superkingdom	Unknown Kingdom	Unknown Phylum	Unknown Class	Unknown Order	Unknown Family	Unknown Genus	Unknown Species	Unknown Subspecies	3419	7973		TaxMP_MPAv1_NewWF_BGP_1_C.csv
	TaxMP_MPAv1_NewWF_BGP_1_C.csv		Bacteria	Unknown Kingdom	Proteobacteria	Gammaproteobacteria	Alteromonadales	Shewanellaceae	Shewanella	Shewanella oneidensis	Shewanella oneidensis MR-1	1	1		TaxMP_MPAv1_NewWF_BGP_1_C.csv
	TaxMP_MPAv1_NewWF_BGP_1_C.csv		Bacteria	Unknown Kingdom	Proteobacteria	Gammaproteobacteria	Pseudomonadales	Moraxellaceae	Acinetobacter	Acinetobacter sp. ADP1	Unknown Subspecies	1	1		TaxMP_MPAv1_NewWF_BGP_1_C.csv
	TaxMP_MPAv1_NewWF_BGP_1_C.csv		Bacteria	Unknown Kingdom	Unknown Phylum	Unknown Class	Unknown Order	Unknown Family	Unknown Genus	Unknown Species	Unknown Subspecies	4	2		TaxMP_MPAv1_NewWF_BGP_1_C.csv
	TaxMP_MPAv1_NewWF_BGP_1_C.csv		Eukaryota	Metazoa	Chordata	Mammalia	Primates	Hominidae	Homo	Homo sapiens	Unknown Subspecies	3	3		TaxMP_MPAv1_NewWF_BGP_1_C.csv
	TaxMP_MPAv1_NewWF_BGP_1_C.csv		Eukaryota	Viridiplantae	Streptophyta	Liliopsida	Poales	Poaceae	Oryza	Oryza sativa	Oryza sativa Indica Group	1	1		TaxMP_MPAv1_NewWF_BGP_1_C.csv
	TaxMP_MPAv1_NewWF_BGP_1_C.csv		Eukaryota	Viridiplantae	Streptophyta	Liliopsida	Poales	Poaceae	Oryza	Oryza sativa	Oryza sativa Japonica Group	3	8		TaxMP_MPAv1_NewWF_BGP_1_C.csv
	TaxMP_MPAv1_NewWF_BGP_1_C.csv		Bacteria	Unknown Kingdom	Cyanobacteria	Unknown Class	Nostocales	Nostocaceae	Nostoc	Nostoc sp. PCC 7120	Unknown Subspecies	1	2		TaxMP_MPAv1_NewWF_BGP_1_C.csv
	TaxMP_MPAv1_NewWF_BGP_1_C.csv		Archaea	Unknown Kingdom	Euryarchaeota	Methanomicrobia	Methanosarcinales	Methanosarcinaceae	Methanosarcina	Methanosarcina acetivorans	Methanosarcina acetivorans C2A	4	7		TaxMP_MPAv1_NewWF_BGP_1_C.csv
	TaxMP_MPAv1_NewWF_BGP_1_C.csv		Bacteria	Unknown Kingdom	Firmicutes	Clostridia	Thermoanaerobacterales	Thermoanaerobacterales Family III. Incertae Sedis	Caldicellulosiruptor	Caldicellulosiruptor saccharolyticus	Caldicellulosiruptor saccharolyticus DSM 8903	1	2		TaxMP_MPAv1_NewWF_BGP_1_C.csv
	TaxMP_MPAv1_NewWF_BGP_1_C.csv		Bacteria	Unknown Kingdom	Firmicutes	Bacilli	Bacillales	Bacillaceae	Geobacillus	Geobacillus stearothermophilus	Unknown Subspecies	1	2		TaxMP_MPAv1_NewWF_BGP_1_C.csv
	TaxMP_MPAv1_NewWF_BGP_1_C.csv		Bacteria	Unknown Kingdom	Proteobacteria	Gammaproteobacteria	Pseudomonadales	Pseudomonadaceae	Pseudomonas	Pseudomonas fluorescens	Pseudomonas fluorescens SBW25	1	1		TaxMP_MPAv1_NewWF_BGP_1_C.csv
	TaxMP_MPAv1_NewWF_BGP_1_C.csv		Eukaryota	Unknown Kingdom	Unknown Phylum	Unknown Class	Dictyosteliida	Unknown Family	Dictyostelium	Dictyostelium discoideum	Unknown Subspecies	1	3		TaxMP_MPAv1_NewWF_BGP_1_C.csv
	TaxMP_MPAv1_NewWF_BGP_1_C.csv		Archaea	Unknown Kingdom	Euryarchaeota	Methanomicrobia	Methanomicrobiales	Methanomicrobiaceae	Methanoculleus	Methanoculleus marisnigri	Methanoculleus marisnigri JR1	1	1		TaxMP_MPAv1_NewWF_BGP_1_C.csv
	TaxMP_MPAv1_NewWF_BGP_1_C.csv		Bacteria	Unknown Kingdom	Deinococcus-Thermus	Deinococci	Deinococcales	Deinococcaceae	Deinococcus	Unknown Species	Unknown Subspecies	1	2		TaxMP_MPAv1_NewWF_BGP_1_C.csv
	TaxMP_MPAv1_NewWF_BGP_1_C.csv		Eukaryota	Metazoa	Chordata	Actinopterygii	Cypriniformes	Cyprinidae	Danio	Danio rerio	Unknown Subspecies	1	1		TaxMP_MPAv1_NewWF_BGP_1_C.csv
	TaxMP_MPAv1_NewWF_BGP_1_C.csv		Bacteria	Unknown Kingdom	Firmicutes	Bacilli	Lactobacillales	Streptococcaceae	Unknown Genus	Unknown Species	Unknown Subspecies	1	1		TaxMP_MPAv1_NewWF_BGP_1_C.csv
	TaxMP_MPAv1_NewWF_BGP_1_C.csv		Bacteria	Unknown Kingdom	Firmicutes	Bacilli	Lactobacillales	Streptococcaceae	Streptococcus	Unknown Species	Unknown Subspecies	2	3		TaxMP_MPAv1_NewWF_BGP_1_C.csv
	TaxMP_MPAv1_NewWF_BGP_1_C.csv		Bacteria	Unknown Kingdom	Proteobacteria	Gammaproteobacteria	Thiotrichales	Francisellaceae	Francisella	Francisella tularensis subsp. tularensis FSC198	Francisella tularensis subsp. tularensis	1	1		TaxMP_MPAv1_NewWF_BGP_1_C.csv
	TaxMP_MPAv1_NewWF_BGP_1_C.csv		Eukaryota	Viridiplantae	Streptophyta	Unknown Class	Asterales	Campanulaceae	Lobelia	Lobelia sp.	Unknown Subspecies	1	1		TaxMP_MPAv1_NewWF_BGP_1_C.csv
	TaxMP_MPAv1_NewWF_BGP_1_C.csv		Bacteria	Unknown Kingdom	Proteobacteria	Gammaproteobacteria	Enterobacteriales	Enterobacteriaceae	Unknown Genus	Unknown Species	Unknown Subspecies	1	2		TaxMP_MPAv1_NewWF_BGP_1_C.csv
	TaxMP_MPAv1_NewWF_BGP_1_C.csv		Archaea	Unknown Kingdom	Euryarchaeota	Methanomicrobia	Methanosarcinales	Methanosarcinaceae	Methanosarcina	Unknown Species	Unknown Subspecies	1	1		TaxMP_MPAv1_NewWF_BGP_1_C.csv
	TaxMP_MPAv1_NewWF_BGP_1_C.csv		Bacteria	Unknown Kingdom	Proteobacteria	Alphaproteobacteria	Rhizobiales	Bradyrhizobiaceae	Rhodopseudomonas	Rhodopseudomonas palustris	Rhodopseudomonas palustris CGA009	1	1		TaxMP_MPAv1_NewWF_BGP_1_C.csv
	TaxMP_MPAv1_NewWF_BGP_1_C.csv		Archaea	Unknown Kingdom	Euryarchaeota	Methanomicrobia	Methanosarcinales	Methanosarcinaceae	Methanosarcina	Methanosarcina thermophila	Unknown Subspecies	1	1		TaxMP_MPAv1_NewWF_BGP_1_C.csv
	TaxMP_MPAv1_NewWF_BGP_1_C.csv		Bacteria	Unknown Kingdom	Firmicutes	Clostridia	Clostridiales	Clostridiaceae	Clostridium	Clostridium botulinum	Clostridium botulinum B1 str. Okra	1	2		TaxMP_MPAv1_NewWF_BGP_1_C.csv
	TaxMP_MPAv1_NewWF_BGP_1_C.csv		Archaea	Unknown Kingdom	Crenarchaeota	Thermoprotei	Sulfolobales	Sulfolobaceae	Sulfolobus	Sulfolobus tokodaii	Sulfolobus tokodaii str. 7	1	1		TaxMP_MPAv1_NewWF_BGP_1_C.csv
	TaxMP_MPAv1_NewWF_BGP_1_C.csv		Eukaryota	Viridiplantae	Streptophyta	Unknown Class	Unknown Order	Unknown Family	Unknown Genus	Unknown Species	Unknown Subspecies	11	12		TaxMP_MPAv1_NewWF_BGP_1_C.csv
	TaxMP_MPAv1_NewWF_BGP_1_C.csv		Eukaryota	Metazoa	Chordata	Mammalia	Unknown Order	Bovidae	Unknown Genus	Unknown Species	Unknown Subspecies	1	2		TaxMP_MPAv1_NewWF_BGP_1_C.csv
	TaxMP_MPAv1_NewWF_BGP_1_C.csv		Bacteria	Unknown Kingdom	Firmicutes	Bacilli	Bacillales	Bacillaceae	Bacillus	Bacillus halodurans	Bacillus halodurans C-125	1	2		TaxMP_MPAv1_NewWF_BGP_1_C.csv
	TaxMP_MPAv1_NewWF_BGP_1_C.csv		Eukaryota	Fungi	Ascomycota	Saccharomycetes	Saccharomycetales	Saccharomycetaceae	Kluyveromyces	Kluyveromyces lactis	Kluyveromyces lactis NRRL Y-1140	1	1		TaxMP_MPAv1_NewWF_BGP_1_C.csv
	TaxMP_MPAv1_NewWF_BGP_1_C.csv		Bacteria	Unknown Kingdom	Verrucomicrobia	Unknown Class	Methylacidiphilales	Methylacidiphilaceae	Methylacidiphilum	Methylacidiphilum infernorum	Methylacidiphilum infernorum V4	1	1		TaxMP_MPAv1_NewWF_BGP_1_C.csv
	TaxMP_MPAv1_NewWF_BGP_1_C.csv		Bacteria	Unknown Kingdom	Bacteroidetes	Flavobacteriia	Flavobacteriales	Flavobacteriaceae	Flavobacterium	Flavobacterium psychrophilum	Flavobacterium psychrophilum JIP02/86	1	1		TaxMP_MPAv1_NewWF_BGP_1_C.csv
	TaxMP_MPAv1_NewWF_BGP_1_C.csv		Bacteria	Unknown Kingdom	Proteobacteria	Betaproteobacteria	Neisseriales	Neisseriaceae	Neisseria	Neisseria gonorrhoeae	Neisseria gonorrhoeae FA 1090	1	1		TaxMP_MPAv1_NewWF_BGP_1_C.csv
	TaxMP_MPAv1_NewWF_BGP_1_C.csv		Bacteria	Unknown Kingdom	Firmicutes	Bacilli	Unknown Order	Unknown Family	Unknown Genus	Unknown Species	Unknown Subspecies	1	3		TaxMP_MPAv1_NewWF_BGP_1_C.csv
	TaxMP_MPAv1_NewWF_BGP_1_C.csv		Bacteria	Unknown Kingdom	Proteobacteria	Alphaproteobacteria	Rhizobiales	Bartonellaceae	Bartonella	Bartonella tribocorum	Bartonella tribocorum CIP 105476	1	1		TaxMP_MPAv1_NewWF_BGP_1_C.csv
	TaxMP_MPAv1_NewWF_BGP_1_C.csv		Eukaryota	Viridiplantae	Streptophyta	Liliopsida	Poales	Poaceae	Oryza	Oryza nivara	Unknown Subspecies	1	1		TaxMP_MPAv1_NewWF_BGP_1_C.csv
	TaxMP_MPAv1_NewWF_BGP_1_C.csv		Viruses	Unknown Kingdom	Unknown Phylum	Unknown Class	Picornavirales	Secoviridae	Nepovirus	Beet ringspot virus	Unknown Subspecies	1	1		TaxMP_MPAv1_NewWF_BGP_1_C.csv
	TaxMP_MPAv1_NewWF_BGP_1_C.csv		Archaea	Unknown Kingdom	Euryarchaeota	Methanomicrobia	Methanosarcinales	Methanosarcinaceae	Methanosarcina	Methanosarcina mazei	Methanosarcina mazei Go1	2	3		TaxMP_MPAv1_NewWF_BGP_1_C.csv
	TaxMP_MPAv1_NewWF_BGP_1_C.csv		Bacteria	Unknown Kingdom	Proteobacteria	Alphaproteobacteria	Rhodospirillales	Acetobacteraceae	Gluconacetobacter	Gluconacetobacter diazotrophicus	Gluconacetobacter diazotrophicus PAl 5	1	1		TaxMP_MPAv1_NewWF_BGP_1_C.csv
	TaxMP_MPAv1_NewWF_BGP_1_C.csv		Bacteria	Unknown Kingdom	Firmicutes	Clostridia	Clostridiales	Clostridiaceae	Alkaliphilus	Alkaliphilus metalliredigens	Alkaliphilus metalliredigens QYMF	1	1		TaxMP_MPAv1_NewWF_BGP_1_C.csv
	TaxMP_MPAv1_NewWF_BGP_1_C.csv		Bacteria	Unknown Kingdom	Tenericutes	Mollicutes	Mycoplasmatales	Mycoplasmataceae	Mycoplasma	Mycoplasma synoviae	Mycoplasma synoviae 53	1	1		TaxMP_MPAv1_NewWF_BGP_1_C.csv
	TaxMP_MPAv1_NewWF_BGP_1_C.csv		Eukaryota	Unknown Kingdom	Unknown Phylum	Unknown Class	Unknown Order	Unknown Family	Unknown Genus	Unknown Species	Unknown Subspecies	5	10		TaxMP_MPAv1_NewWF_BGP_1_C.csv
	TaxMP_MPAv1_NewWF_BGP_1_C.csv		Bacteria	Unknown Kingdom	Proteobacteria	Unknown Class	Unknown Order	Unknown Family	Unknown Genus	Unknown Species	Unknown Subspecies	1	3		TaxMP_MPAv1_NewWF_BGP_1_C.csv
	TaxMP_MPAv1_NewWF_BGP_1_C.csv		Eukaryota	Fungi	Ascomycota	Dothideomycetes	Pleosporales	Phaeosphaeriaceae	Phaeosphaeria	Phaeosphaeria nodorum	Phaeosphaeria nodorum SN15	1	2		TaxMP_MPAv1_NewWF_BGP_1_C.csv
	TaxMP_MPAv1_NewWF_BGP_1_C.csv		Bacteria	Unknown Kingdom	Firmicutes	Clostridia	Clostridiales	Clostridiaceae	Clostridium	Clostridium botulinum	Unknown Subspecies	1	1		TaxMP_MPAv1_NewWF_BGP_1_C.csv
	TaxMP_MPAv1_NewWF_BGP_1_C.csv		Bacteria	Unknown Kingdom	Proteobacteria	Gammaproteobacteria	Pasteurellales	Pasteurellaceae	Histophilus	Histophilus somni	Haemophilus somnus 129PT	1	1		TaxMP_MPAv1_NewWF_BGP_1_C.csv
	TaxMP_MPAv1_NewWF_BGP_1_C.csv		Eukaryota	Fungi	Basidiomycota	Agaricomycetes	Russulales	Russulaceae	Lactarius	Lactarius deliciosus	Lactarius deliciosus var. deterrimus	1	2		TaxMP_MPAv1_NewWF_BGP_1_C.csv
	TaxMP_MPAv1_NewWF_BGP_1_C.csv		Eukaryota	Metazoa	Chordata	Mammalia	Unknown Order	Suidae	Sus	Sus scrofa	Unknown Subspecies	1	1		TaxMP_MPAv1_NewWF_BGP_1_C.csv
	TaxMP_MPAv1_NewWF_BGP_1_C.csv		Bacteria	Unknown Kingdom	Firmicutes	Clostridia	Clostridiales	Clostridiaceae	Clostridium	Clostridium perfringens	Clostridium perfringens SM101	1	2		TaxMP_MPAv1_NewWF_BGP_1_C.csv
	TaxMP_MPAv1_NewWF_BGP_1_C.csv		Eukaryota	Viridiplantae	Streptophyta	Liliopsida	Poales	Poaceae	Zea	Zea mays	Unknown Subspecies	7	59		TaxMP_MPAv1_NewWF_BGP_1_C.csv
	TaxMP_MPAv1_NewWF_BGP_1_C.csv		Eukaryota	Metazoa	Chordata	Mammalia	Unknown Order	Unknown Family	Unknown Genus	Unknown Species	Unknown Subspecies	15	39		TaxMP_MPAv1_NewWF_BGP_1_C.csv
	TaxMP_MPAv1_NewWF_BGP_1_C.csv		Bacteria	Unknown Kingdom	Proteobacteria	Gammaproteobacteria	Enterobacteriales	Enterobacteriaceae	Serratia	Unknown Species	Unknown Subspecies	1	3		TaxMP_MPAv1_NewWF_BGP_1_C.csv
	TaxMP_MPAv1_NewWF_BGP_1_C.csv		Bacteria	Unknown Kingdom	Firmicutes	Clostridia	Clostridiales	Clostridiaceae	Clostridium	Clostridium sporogenes	Unknown Subspecies	1	1		TaxMP_MPAv1_NewWF_BGP_1_C.csv
	TaxMP_MPAv1_NewWF_BGP_1_C.csv		Bacteria	Unknown Kingdom	Proteobacteria	Epsilonproteobacteria	Campylobacterales	Helicobacteraceae	Wolinella	Wolinella succinogenes	Wolinella succinogenes DSM 1740	1	1		TaxMP_MPAv1_NewWF_BGP_1_C.csv
	TaxMP_MPAv1_NewWF_BGP_1_C.csv		Eukaryota	Viridiplantae	Streptophyta	Unknown Class	Brassicales	Brassicaceae	Arabidopsis	Arabidopsis thaliana	Unknown Subspecies	3	3		TaxMP_MPAv1_NewWF_BGP_1_C.csv
	TaxMP_MPAv1_NewWF_BGP_1_C.csv		Eukaryota	Viridiplantae	Streptophyta	Unknown Class	Nymphaeales	Nymphaeaceae	Nymphaea	Nymphaea alba	Unknown Subspecies	1	1		TaxMP_MPAv1_NewWF_BGP_1_C.csv
	TaxMP_MPAv1_NewWF_BGP_1_C.csv		Eukaryota	Viridiplantae	Streptophyta	Liliopsida	Poales	Poaceae	Unknown Genus	Unknown Species	Unknown Subspecies	1	2		TaxMP_MPAv1_NewWF_BGP_1_C.csv
	TaxMP_MPAv1_NewWF_BGP_2_A.csv		Archaea	Unknown Kingdom	Crenarchaeota	Thermoprotei	Thermoproteales	Thermoproteaceae	Pyrobaculum	Pyrobaculum aerophilum	Pyrobaculum aerophilum str. IM2	1	1		TaxMP_MPAv1_NewWF_BGP_2_A.csv
	TaxMP_MPAv1_NewWF_BGP_2_A.csv		Unknown Superkingdom	Unknown Kingdom	Unknown Phylum	Unknown Class	Unknown Order	Unknown Family	Unknown Genus	Unknown Species	Unknown Subspecies	3580	8102		TaxMP_MPAv1_NewWF_BGP_2_A.csv
	TaxMP_MPAv1_NewWF_BGP_2_A.csv		Eukaryota	Viridiplantae	Streptophyta	Unknown Class	Sapindales	Simaroubaceae	Ailanthus	Ailanthus altissima	Unknown Subspecies	1	1		TaxMP_MPAv1_NewWF_BGP_2_A.csv
	TaxMP_MPAv1_NewWF_BGP_2_A.csv		Bacteria	Unknown Kingdom	Unknown Phylum	Unknown Class	Unknown Order	Unknown Family	Unknown Genus	Unknown Species	Unknown Subspecies	1	3		TaxMP_MPAv1_NewWF_BGP_2_A.csv
	TaxMP_MPAv1_NewWF_BGP_2_A.csv		Eukaryota	Metazoa	Chordata	Mammalia	Rodentia	Muridae	Rattus	Rattus norvegicus	Unknown Subspecies	1	1		TaxMP_MPAv1_NewWF_BGP_2_A.csv
	TaxMP_MPAv1_NewWF_BGP_2_A.csv		Eukaryota	Metazoa	Chordata	Mammalia	Primates	Hominidae	Unknown Genus	Unknown Species	Unknown Subspecies	1	2		TaxMP_MPAv1_NewWF_BGP_2_A.csv
	TaxMP_MPAv1_NewWF_BGP_2_A.csv		Bacteria	Unknown Kingdom	Firmicutes	Bacilli	Bacillales	Bacillaceae	Bacillus	Bacillus clausii	Bacillus clausii KSM-K16	1	1		TaxMP_MPAv1_NewWF_BGP_2_A.csv
	TaxMP_MPAv1_NewWF_BGP_2_A.csv		Eukaryota	Metazoa	Chordata	Mammalia	Primates	Hominidae	Homo	Homo sapiens	Unknown Subspecies	4	10		TaxMP_MPAv1_NewWF_BGP_2_A.csv
	TaxMP_MPAv1_NewWF_BGP_2_A.csv		Eukaryota	Viridiplantae	Streptophyta	Liliopsida	Poales	Poaceae	Oryza	Oryza sativa	Oryza sativa Japonica Group	4	9		TaxMP_MPAv1_NewWF_BGP_2_A.csv
	TaxMP_MPAv1_NewWF_BGP_2_A.csv		Bacteria	Unknown Kingdom	Cyanobacteria	Unknown Class	Nostocales	Nostocaceae	Nostoc	Nostoc sp. PCC 7120	Unknown Subspecies	2	2		TaxMP_MPAv1_NewWF_BGP_2_A.csv
	TaxMP_MPAv1_NewWF_BGP_2_A.csv		Eukaryota	Viridiplantae	Streptophyta	Unknown Class	Solanales	Solanaceae	Solanum	Unknown Species	Unknown Subspecies	1	1		TaxMP_MPAv1_NewWF_BGP_2_A.csv
	TaxMP_MPAv1_NewWF_BGP_2_A.csv		Bacteria	Unknown Kingdom	Firmicutes	Bacilli	Bacillales	Unknown Family	Exiguobacterium	Exiguobacterium sibiricum	Exiguobacterium sibiricum 255-15	1	1		TaxMP_MPAv1_NewWF_BGP_2_A.csv
	TaxMP_MPAv1_NewWF_BGP_2_A.csv		Archaea	Unknown Kingdom	Euryarchaeota	Methanomicrobia	Methanosarcinales	Methanosarcinaceae	Methanosarcina	Methanosarcina acetivorans	Methanosarcina acetivorans C2A	1	1		TaxMP_MPAv1_NewWF_BGP_2_A.csv
	TaxMP_MPAv1_NewWF_BGP_2_A.csv		Eukaryota	Viridiplantae	Streptophyta	Liliopsida	Poales	Poaceae	Agrostis	Agrostis stolonifera	Unknown Subspecies	1	1		TaxMP_MPAv1_NewWF_BGP_2_A.csv
	TaxMP_MPAv1_NewWF_BGP_2_A.csv		Eukaryota	Unknown Kingdom	Unknown Phylum	Unknown Class	Dictyosteliida	Unknown Family	Dictyostelium	Dictyostelium discoideum	Unknown Subspecies	2	2		TaxMP_MPAv1_NewWF_BGP_2_A.csv
	TaxMP_MPAv1_NewWF_BGP_2_A.csv		Bacteria	Unknown Kingdom	Proteobacteria	Gammaproteobacteria	Alteromonadales	Shewanellaceae	Shewanella	Shewanella sediminis	Shewanella sediminis HAW-EB3	1	1		TaxMP_MPAv1_NewWF_BGP_2_A.csv
	TaxMP_MPAv1_NewWF_BGP_2_A.csv		Archaea	Unknown Kingdom	Euryarchaeota	Methanomicrobia	Methanosarcinales	Methanosarcinaceae	Methanosarcina	Unknown Species	Unknown Subspecies	3	5		TaxMP_MPAv1_NewWF_BGP_2_A.csv
	TaxMP_MPAv1_NewWF_BGP_2_A.csv		Bacteria	Unknown Kingdom	Proteobacteria	Gammaproteobacteria	Enterobacteriales	Enterobacteriaceae	Unknown Genus	Unknown Species	Unknown Subspecies	2	3		TaxMP_MPAv1_NewWF_BGP_2_A.csv
	TaxMP_MPAv1_NewWF_BGP_2_A.csv		Bacteria	Unknown Kingdom	Proteobacteria	Gammaproteobacteria	Enterobacteriales	Enterobacteriaceae	Citrobacter	Citrobacter freundii	Unknown Subspecies	1	1		TaxMP_MPAv1_NewWF_BGP_2_A.csv
	TaxMP_MPAv1_NewWF_BGP_2_A.csv		Archaea	Unknown Kingdom	Euryarchaeota	Methanomicrobia	Methanosarcinales	Methanosarcinaceae	Methanosarcina	Methanosarcina thermophila	Unknown Subspecies	1	1		TaxMP_MPAv1_NewWF_BGP_2_A.csv
	TaxMP_MPAv1_NewWF_BGP_2_A.csv		Eukaryota	Viridiplantae	Streptophyta	Unknown Class	Unknown Order	Unknown Family	Unknown Genus	Unknown Species	Unknown Subspecies	18	23		TaxMP_MPAv1_NewWF_BGP_2_A.csv
	TaxMP_MPAv1_NewWF_BGP_2_A.csv		Bacteria	Unknown Kingdom	Firmicutes	Clostridia	Clostridiales	Clostridiaceae	Clostridium	Clostridium botulinum	Clostridium botulinum A str. ATCC 19397	1	1		TaxMP_MPAv1_NewWF_BGP_2_A.csv
	TaxMP_MPAv1_NewWF_BGP_2_A.csv		Bacteria	Unknown Kingdom	Proteobacteria	Gammaproteobacteria	Aeromonadales	Aeromonadaceae	Tolumonas	Tolumonas auensis	Tolumonas auensis DSM 9187	1	1		TaxMP_MPAv1_NewWF_BGP_2_A.csv
	TaxMP_MPAv1_NewWF_BGP_2_A.csv		Eukaryota	Viridiplantae	Streptophyta	Liliopsida	Poales	Poaceae	Oryza	Oryza sativa	Unknown Subspecies	1	1		TaxMP_MPAv1_NewWF_BGP_2_A.csv
	TaxMP_MPAv1_NewWF_BGP_2_A.csv		Bacteria	Unknown Kingdom	Firmicutes	Bacilli	Lactobacillales	Lactobacillaceae	Lactobacillus	Lactobacillus fermentum	Lactobacillus fermentum IFO 3956	1	1		TaxMP_MPAv1_NewWF_BGP_2_A.csv
	TaxMP_MPAv1_NewWF_BGP_2_A.csv		Bacteria	Unknown Kingdom	Proteobacteria	Alphaproteobacteria	Unknown Order	Unknown Family	Unknown Genus	Unknown Species	Unknown Subspecies	1	1		TaxMP_MPAv1_NewWF_BGP_2_A.csv
	TaxMP_MPAv1_NewWF_BGP_2_A.csv		Eukaryota	Fungi	Ascomycota	Saccharomycetes	Saccharomycetales	Saccharomycetaceae	Saccharomyces	Saccharomyces cerevisiae	Saccharomyces cerevisiae S288c	1	1		TaxMP_MPAv1_NewWF_BGP_2_A.csv
	TaxMP_MPAv1_NewWF_BGP_2_A.csv		Bacteria	Unknown Kingdom	Firmicutes	Bacilli	Unknown Order	Unknown Family	Unknown Genus	Unknown Species	Unknown Subspecies	1	1		TaxMP_MPAv1_NewWF_BGP_2_A.csv
	TaxMP_MPAv1_NewWF_BGP_2_A.csv		Bacteria	Unknown Kingdom	Firmicutes	Bacilli	Bacillales	Bacillaceae	Bacillus	Bacillus subtilis subsp. subtilis str. 168	Bacillus subtilis subsp. subtilis	1	2		TaxMP_MPAv1_NewWF_BGP_2_A.csv
	TaxMP_MPAv1_NewWF_BGP_2_A.csv		Eukaryota	Metazoa	Chordata	Mammalia	Unknown Order	Bovidae	Bos	Bos taurus	Unknown Subspecies	1	1		TaxMP_MPAv1_NewWF_BGP_2_A.csv
	TaxMP_MPAv1_NewWF_BGP_2_A.csv		Archaea	Unknown Kingdom	Euryarchaeota	Methanomicrobia	Methanosarcinales	Methanosarcinaceae	Methanosarcina	Methanosarcina mazei	Methanosarcina mazei Go1	1	2		TaxMP_MPAv1_NewWF_BGP_2_A.csv
	TaxMP_MPAv1_NewWF_BGP_2_A.csv		Eukaryota	Metazoa	Arthropoda	Insecta	Diptera	Drosophilidae	Drosophila	Drosophila melanogaster	Unknown Subspecies	1	1		TaxMP_MPAv1_NewWF_BGP_2_A.csv
	TaxMP_MPAv1_NewWF_BGP_2_A.csv		Bacteria	Unknown Kingdom	Actinobacteria	Actinobacteria	Bifidobacteriales	Bifidobacteriaceae	Bifidobacterium	Bifidobacterium adolescentis	Bifidobacterium adolescentis ATCC 15703	1	1		TaxMP_MPAv1_NewWF_BGP_2_A.csv
	TaxMP_MPAv1_NewWF_BGP_2_A.csv		Bacteria	Unknown Kingdom	Chloroflexi	Chloroflexi	Herpetosiphonales	Herpetosiphonaceae	Herpetosiphon	Herpetosiphon aurantiacus	Unknown Subspecies	1	3		TaxMP_MPAv1_NewWF_BGP_2_A.csv
	TaxMP_MPAv1_NewWF_BGP_2_A.csv		Eukaryota	Unknown Kingdom	Unknown Phylum	Unknown Class	Unknown Order	Unknown Family	Unknown Genus	Unknown Species	Unknown Subspecies	12	34		TaxMP_MPAv1_NewWF_BGP_2_A.csv
	TaxMP_MPAv1_NewWF_BGP_2_A.csv		Eukaryota	Viridiplantae	Streptophyta	Unknown Class	Cucurbitales	Cucurbitaceae	Cucumis	Cucumis sativus	Unknown Subspecies	1	1		TaxMP_MPAv1_NewWF_BGP_2_A.csv
	TaxMP_MPAv1_NewWF_BGP_2_A.csv		Bacteria	Unknown Kingdom	Firmicutes	Clostridia	Clostridiales	Heliobacteriaceae	Heliobacterium	Heliobacterium modesticaldum	Heliobacterium modesticaldum Ice1	1	1		TaxMP_MPAv1_NewWF_BGP_2_A.csv
	TaxMP_MPAv1_NewWF_BGP_2_A.csv		Bacteria	Unknown Kingdom	Bacteroidetes	Unknown Class	Unknown Order	Unknown Family	Unknown Genus	Unknown Species	Unknown Subspecies	2	1		TaxMP_MPAv1_NewWF_BGP_2_A.csv
	TaxMP_MPAv1_NewWF_BGP_2_A.csv		Bacteria	Unknown Kingdom	Thermotogae	Thermotogae	Thermotogales	Thermotogaceae	Kosmotoga	Kosmotoga olearia	Kosmotoga olearia TBF 19.5.1	1	1		TaxMP_MPAv1_NewWF_BGP_2_A.csv
	TaxMP_MPAv1_NewWF_BGP_2_A.csv		Bacteria	Unknown Kingdom	Proteobacteria	Gammaproteobacteria	Oceanospirillales	Halomonadaceae	Chromohalobacter	Chromohalobacter salexigens	Chromohalobacter salexigens DSM 3043	1	1		TaxMP_MPAv1_NewWF_BGP_2_A.csv
	TaxMP_MPAv1_NewWF_BGP_2_A.csv		Eukaryota	Metazoa	Arthropoda	Insecta	Diptera	Drosophilidae	Drosophila	Drosophila willistoni	Unknown Subspecies	1	1		TaxMP_MPAv1_NewWF_BGP_2_A.csv
	TaxMP_MPAv1_NewWF_BGP_2_A.csv		Bacteria	Unknown Kingdom	Proteobacteria	Gammaproteobacteria	Pseudomonadales	Pseudomonadaceae	Pseudomonas	Pseudomonas putida	Pseudomonas putida W619	1	1		TaxMP_MPAv1_NewWF_BGP_2_A.csv
	TaxMP_MPAv1_NewWF_BGP_2_A.csv		Bacteria	Unknown Kingdom	Firmicutes	Clostridia	Clostridiales	Clostridiaceae	Clostridium	Clostridium perfringens	Unknown Subspecies	1	3		TaxMP_MPAv1_NewWF_BGP_2_A.csv
	TaxMP_MPAv1_NewWF_BGP_2_A.csv		Eukaryota	Viridiplantae	Streptophyta	Liliopsida	Poales	Poaceae	Zea	Zea mays	Unknown Subspecies	4	19		TaxMP_MPAv1_NewWF_BGP_2_A.csv
	TaxMP_MPAv1_NewWF_BGP_2_A.csv		Eukaryota	Metazoa	Chordata	Mammalia	Unknown Order	Unknown Family	Unknown Genus	Unknown Species	Unknown Subspecies	10	19		TaxMP_MPAv1_NewWF_BGP_2_A.csv
	TaxMP_MPAv1_NewWF_BGP_2_A.csv		Eukaryota	Metazoa	Chordata	Chondrichthyes	Rajiformes	Arhynchobatidae	Bathyraja	Bathyraja eatonii	Unknown Subspecies	1	1		TaxMP_MPAv1_NewWF_BGP_2_A.csv
	TaxMP_MPAv1_NewWF_BGP_2_A.csv		Eukaryota	Metazoa	Chordata	Mammalia	Rodentia	Muridae	Mus	Mus musculus	Unknown Subspecies	1	1		TaxMP_MPAv1_NewWF_BGP_2_A.csv
	TaxMP_MPAv1_NewWF_BGP_2_A.csv		Archaea	Unknown Kingdom	Euryarchaeota	Methanobacteria	Methanobacteriales	Unknown Family	Unknown Genus	Unknown Species	Unknown Subspecies	3	5		TaxMP_MPAv1_NewWF_BGP_2_A.csv
	TaxMP_MPAv1_NewWF_BGP_2_A.csv		Eukaryota	Viridiplantae	Chlorophyta	Chlorophyceae	Chlamydomonadales	Chlamydomonadaceae	Chlamydomonas	Chlamydomonas reinhardtii	Unknown Subspecies	1	1		TaxMP_MPAv1_NewWF_BGP_2_A.csv
	TaxMP_MPAv1_NewWF_BGP_2_A.csv		Eukaryota	Viridiplantae	Streptophyta	Unknown Class	Solanales	Solanaceae	Solanum	Solanum lycopersicum	Unknown Subspecies	1	1		TaxMP_MPAv1_NewWF_BGP_2_A.csv
	TaxMP_MPAv1_NewWF_BGP_2_A.csv		Eukaryota	Viridiplantae	Streptophyta	Unknown Class	Brassicales	Brassicaceae	Arabidopsis	Arabidopsis thaliana	Unknown Subspecies	3	3		TaxMP_MPAv1_NewWF_BGP_2_A.csv
	TaxMP_MPAv1_NewWF_BGP_2_A.csv		Bacteria	Unknown Kingdom	Actinobacteria	Actinobacteria	Actinomycetales	Micrococcaceae	Micrococcus	Micrococcus luteus	Unknown Subspecies	1	2		TaxMP_MPAv1_NewWF_BGP_2_A.csv
	TaxMP_MPAv1_NewWF_BGP_2_A.csv		Bacteria	Unknown Kingdom	Tenericutes	Mollicutes	Mycoplasmatales	Mycoplasmataceae	Mycoplasma	Mycoplasma penetrans	Mycoplasma penetrans HF-2	1	2		TaxMP_MPAv1_NewWF_BGP_2_A.csv
	TaxMP_MPAv1_NewWF_BGP_2_A.csv		Eukaryota	Viridiplantae	Streptophyta	Unknown Class	Nymphaeales	Nymphaeaceae	Nymphaea	Nymphaea alba	Unknown Subspecies	1	1		TaxMP_MPAv1_NewWF_BGP_2_A.csv
	TaxMP_MPAv1_NewWF_BGP_2_A.csv		Eukaryota	Viridiplantae	Streptophyta	Liliopsida	Poales	Poaceae	Unknown Genus	Unknown Species	Unknown Subspecies	3	11		TaxMP_MPAv1_NewWF_BGP_2_A.csv
	TaxMP_MPAv1_NewWF_BGP_2_B.csv		Unknown Superkingdom	Unknown Kingdom	Unknown Phylum	Unknown Class	Unknown Order	Unknown Family	Unknown Genus	Unknown Species	Unknown Subspecies	3009	6466		TaxMP_MPAv1_NewWF_BGP_2_B.csv
	TaxMP_MPAv1_NewWF_BGP_2_B.csv		Bacteria	Unknown Kingdom	Chloroflexi	Chloroflexi	Herpetosiphonales	Herpetosiphonaceae	Herpetosiphon	Herpetosiphon aurantiacus	Unknown Subspecies	1	1		TaxMP_MPAv1_NewWF_BGP_2_B.csv
	TaxMP_MPAv1_NewWF_BGP_2_B.csv		Bacteria	Unknown Kingdom	Unknown Phylum	Unknown Class	Unknown Order	Unknown Family	Unknown Genus	Unknown Species	Unknown Subspecies	2	5		TaxMP_MPAv1_NewWF_BGP_2_B.csv
	TaxMP_MPAv1_NewWF_BGP_2_B.csv		Bacteria	Unknown Kingdom	Firmicutes	Bacilli	Bacillales	Bacillaceae	Bacillus	Bacillus clausii	Bacillus clausii KSM-K16	1	2		TaxMP_MPAv1_NewWF_BGP_2_B.csv
	TaxMP_MPAv1_NewWF_BGP_2_B.csv		Eukaryota	Metazoa	Chordata	Mammalia	Primates	Hominidae	Homo	Homo sapiens	Unknown Subspecies	2	2		TaxMP_MPAv1_NewWF_BGP_2_B.csv
	TaxMP_MPAv1_NewWF_BGP_2_B.csv		Eukaryota	Metazoa	Chordata	Aves	Galliformes	Phasianidae	Gallus	Gallus gallus	Unknown Subspecies	1	1		TaxMP_MPAv1_NewWF_BGP_2_B.csv
	TaxMP_MPAv1_NewWF_BGP_2_B.csv		Eukaryota	Unknown Kingdom	Unknown Phylum	Unknown Class	Unknown Order	Unknown Family	Unknown Genus	Unknown Species	Unknown Subspecies	6	26		TaxMP_MPAv1_NewWF_BGP_2_B.csv
	TaxMP_MPAv1_NewWF_BGP_2_B.csv		Bacteria	Unknown Kingdom	Actinobacteria	Actinobacteria	Actinomycetales	Mycobacteriaceae	Mycobacterium	Mycobacterium ulcerans	Mycobacterium ulcerans Agy99	1	1		TaxMP_MPAv1_NewWF_BGP_2_B.csv
	TaxMP_MPAv1_NewWF_BGP_2_B.csv		Bacteria	Unknown Kingdom	Bacteroidetes	Bacteroidia	Bacteroidales	Bacteroidaceae	Bacteroides	Bacteroides thetaiotaomicron	Bacteroides thetaiotaomicron VPI-5482	1	2		TaxMP_MPAv1_NewWF_BGP_2_B.csv
	TaxMP_MPAv1_NewWF_BGP_2_B.csv		Bacteria	Unknown Kingdom	Proteobacteria	Betaproteobacteria	Burkholderiales	Unknown Family	Unknown Genus	Unknown Species	Unknown Subspecies	1	1		TaxMP_MPAv1_NewWF_BGP_2_B.csv
	TaxMP_MPAv1_NewWF_BGP_2_B.csv		Eukaryota	Viridiplantae	Streptophyta	Liliopsida	Poales	Poaceae	Oryza	Oryza sativa	Oryza sativa Japonica Group	3	10		TaxMP_MPAv1_NewWF_BGP_2_B.csv
	TaxMP_MPAv1_NewWF_BGP_2_B.csv		Archaea	Unknown Kingdom	Euryarchaeota	Methanomicrobia	Methanosarcinales	Methanosarcinaceae	Methanosarcina	Methanosarcina acetivorans	Methanosarcina acetivorans C2A	2	2		TaxMP_MPAv1_NewWF_BGP_2_B.csv
	TaxMP_MPAv1_NewWF_BGP_2_B.csv		Eukaryota	Viridiplantae	Streptophyta	Liliopsida	Poales	Poaceae	Saccharum	Saccharum sp.	Unknown Subspecies	1	1		TaxMP_MPAv1_NewWF_BGP_2_B.csv
	TaxMP_MPAv1_NewWF_BGP_2_B.csv		Bacteria	Unknown Kingdom	Cyanobacteria	Unknown Class	Chroococcales	Unknown Family	Synechocystis	Synechocystis sp. PCC 6803	Synechocystis sp. PCC 6803 substr. Kazusa	1	1		TaxMP_MPAv1_NewWF_BGP_2_B.csv
	TaxMP_MPAv1_NewWF_BGP_2_B.csv		Bacteria	Unknown Kingdom	Firmicutes	Clostridia	Clostridiales	Heliobacteriaceae	Heliobacterium	Heliobacterium modesticaldum	Heliobacterium modesticaldum Ice1	1	1		TaxMP_MPAv1_NewWF_BGP_2_B.csv
	TaxMP_MPAv1_NewWF_BGP_2_B.csv		Eukaryota	Fungi	Ascomycota	Saccharomycetes	Saccharomycetales	Saccharomycetaceae	Eremothecium	Eremothecium gossypii	Ashbya gossypii ATCC 10895	1	1		TaxMP_MPAv1_NewWF_BGP_2_B.csv
	TaxMP_MPAv1_NewWF_BGP_2_B.csv		Bacteria	Unknown Kingdom	Bacteroidetes	Unknown Class	Unknown Order	Unknown Family	Unknown Genus	Unknown Species	Unknown Subspecies	2	2		TaxMP_MPAv1_NewWF_BGP_2_B.csv
	TaxMP_MPAv1_NewWF_BGP_2_B.csv		Eukaryota	Unknown Kingdom	Unknown Phylum	Unknown Class	Dictyosteliida	Unknown Family	Dictyostelium	Dictyostelium discoideum	Unknown Subspecies	1	5		TaxMP_MPAv1_NewWF_BGP_2_B.csv
	TaxMP_MPAv1_NewWF_BGP_2_B.csv		Eukaryota	Fungi	Ascomycota	Eurotiomycetes	Eurotiales	Trichocomaceae	Penicillium	Penicillium brevicompactum	Unknown Subspecies	1	1		TaxMP_MPAv1_NewWF_BGP_2_B.csv
	TaxMP_MPAv1_NewWF_BGP_2_B.csv		Bacteria	Unknown Kingdom	Actinobacteria	Actinobacteria	Actinomycetales	Frankiaceae	Frankia	Frankia alni	Frankia alni ACN14a	1	1		TaxMP_MPAv1_NewWF_BGP_2_B.csv
	TaxMP_MPAv1_NewWF_BGP_2_B.csv		Archaea	Unknown Kingdom	Euryarchaeota	Methanomicrobia	Methanosarcinales	Methanosarcinaceae	Unknown Genus	Unknown Species	Unknown Subspecies	1	2		TaxMP_MPAv1_NewWF_BGP_2_B.csv
	TaxMP_MPAv1_NewWF_BGP_2_B.csv		Bacteria	Unknown Kingdom	Firmicutes	Clostridia	Clostridiales	Clostridiaceae	Clostridium	Clostridium perfringens	Unknown Subspecies	1	2		TaxMP_MPAv1_NewWF_BGP_2_B.csv
	TaxMP_MPAv1_NewWF_BGP_2_B.csv		Archaea	Unknown Kingdom	Euryarchaeota	Methanomicrobia	Methanosarcinales	Methanosarcinaceae	Methanosarcina	Unknown Species	Unknown Subspecies	2	4		TaxMP_MPAv1_NewWF_BGP_2_B.csv
	TaxMP_MPAv1_NewWF_BGP_2_B.csv		Bacteria	Unknown Kingdom	Proteobacteria	Gammaproteobacteria	Enterobacteriales	Enterobacteriaceae	Unknown Genus	Unknown Species	Unknown Subspecies	2	3		TaxMP_MPAv1_NewWF_BGP_2_B.csv
	TaxMP_MPAv1_NewWF_BGP_2_B.csv		Archaea	Unknown Kingdom	Euryarchaeota	Methanomicrobia	Methanosarcinales	Methanosarcinaceae	Methanosarcina	Methanosarcina barkeri	Methanosarcina barkeri str. Fusaro	1	1		TaxMP_MPAv1_NewWF_BGP_2_B.csv
	TaxMP_MPAv1_NewWF_BGP_2_B.csv		Eukaryota	Viridiplantae	Streptophyta	Liliopsida	Poales	Poaceae	Zea	Zea mays	Unknown Subspecies	5	10		TaxMP_MPAv1_NewWF_BGP_2_B.csv
	TaxMP_MPAv1_NewWF_BGP_2_B.csv		Archaea	Unknown Kingdom	Euryarchaeota	Methanomicrobia	Methanosarcinales	Methanosarcinaceae	Methanosarcina	Methanosarcina thermophila	Unknown Subspecies	1	1		TaxMP_MPAv1_NewWF_BGP_2_B.csv
	TaxMP_MPAv1_NewWF_BGP_2_B.csv		Eukaryota	Metazoa	Chordata	Mammalia	Unknown Order	Unknown Family	Unknown Genus	Unknown Species	Unknown Subspecies	1	3		TaxMP_MPAv1_NewWF_BGP_2_B.csv
	TaxMP_MPAv1_NewWF_BGP_2_B.csv		Bacteria	Unknown Kingdom	Firmicutes	Clostridia	Clostridiales	Clostridiaceae	Alkaliphilus	Alkaliphilus oremlandii	Alkaliphilus oremlandii OhILAs	1	1		TaxMP_MPAv1_NewWF_BGP_2_B.csv
	TaxMP_MPAv1_NewWF_BGP_2_B.csv		Eukaryota	Viridiplantae	Streptophyta	Unknown Class	Unknown Order	Unknown Family	Unknown Genus	Unknown Species	Unknown Subspecies	21	24		TaxMP_MPAv1_NewWF_BGP_2_B.csv
	TaxMP_MPAv1_NewWF_BGP_2_B.csv		Bacteria	Unknown Kingdom	Firmicutes	Bacilli	Bacillales	Bacillaceae	Bacillus	Bacillus licheniformis	Bacillus licheniformis DSM 13 = ATCC 14580	1	1		TaxMP_MPAv1_NewWF_BGP_2_B.csv
	TaxMP_MPAv1_NewWF_BGP_2_B.csv		Eukaryota	Metazoa	Chordata	Mammalia	Rodentia	Muridae	Mus	Mus musculus	Unknown Subspecies	2	2		TaxMP_MPAv1_NewWF_BGP_2_B.csv
	TaxMP_MPAv1_NewWF_BGP_2_B.csv		Bacteria	Unknown Kingdom	Firmicutes	Bacilli	Bacillales	Bacillaceae	Bacillus	Bacillus halodurans	Bacillus halodurans C-125	1	1		TaxMP_MPAv1_NewWF_BGP_2_B.csv
	TaxMP_MPAv1_NewWF_BGP_2_B.csv		Archaea	Unknown Kingdom	Euryarchaeota	Methanobacteria	Methanobacteriales	Unknown Family	Unknown Genus	Unknown Species	Unknown Subspecies	3	5		TaxMP_MPAv1_NewWF_BGP_2_B.csv
	TaxMP_MPAv1_NewWF_BGP_2_B.csv		Archaea	Unknown Kingdom	Euryarchaeota	Methanomicrobia	Methanomicrobiales	Methanocorpusculaceae	Methanocorpusculum	Methanocorpusculum labreanum	Methanocorpusculum labreanum Z	1	1		TaxMP_MPAv1_NewWF_BGP_2_B.csv
	TaxMP_MPAv1_NewWF_BGP_2_B.csv		Eukaryota	Viridiplantae	Streptophyta	Unknown Class	Solanales	Solanaceae	Solanum	Solanum lycopersicum	Unknown Subspecies	1	2		TaxMP_MPAv1_NewWF_BGP_2_B.csv
	TaxMP_MPAv1_NewWF_BGP_2_B.csv		Eukaryota	Viridiplantae	Streptophyta	Liliopsida	Poales	Poaceae	Oryza	Oryza sativa	Unknown Subspecies	1	1		TaxMP_MPAv1_NewWF_BGP_2_B.csv
	TaxMP_MPAv1_NewWF_BGP_2_B.csv		Bacteria	Unknown Kingdom	Proteobacteria	Alphaproteobacteria	Rickettsiales	Rickettsiaceae	Rickettsia	Rickettsia conorii	Rickettsia conorii str. Malish 7	1	1		TaxMP_MPAv1_NewWF_BGP_2_B.csv
	TaxMP_MPAv1_NewWF_BGP_2_B.csv		Bacteria	Unknown Kingdom	Firmicutes	Bacilli	Unknown Order	Unknown Family	Unknown Genus	Unknown Species	Unknown Subspecies	1	1		TaxMP_MPAv1_NewWF_BGP_2_B.csv
	TaxMP_MPAv1_NewWF_BGP_2_B.csv		Bacteria	Unknown Kingdom	Firmicutes	Bacilli	Bacillales	Bacillaceae	Oceanobacillus	Oceanobacillus iheyensis	Oceanobacillus iheyensis HTE831	1	1		TaxMP_MPAv1_NewWF_BGP_2_B.csv
	TaxMP_MPAv1_NewWF_BGP_2_B.csv		Eukaryota	Viridiplantae	Streptophyta	Unknown Class	Brassicales	Brassicaceae	Arabidopsis	Arabidopsis thaliana	Unknown Subspecies	1	1		TaxMP_MPAv1_NewWF_BGP_2_B.csv
	TaxMP_MPAv1_NewWF_BGP_2_B.csv		Bacteria	Unknown Kingdom	Firmicutes	Bacilli	Bacillales	Bacillaceae	Bacillus	Bacillus subtilis subsp. subtilis str. 168	Bacillus subtilis subsp. subtilis	1	1		TaxMP_MPAv1_NewWF_BGP_2_B.csv
	TaxMP_MPAv1_NewWF_BGP_2_B.csv		Bacteria	Unknown Kingdom	Tenericutes	Mollicutes	Mycoplasmatales	Mycoplasmataceae	Mycoplasma	Mycoplasma penetrans	Mycoplasma penetrans HF-2	1	1		TaxMP_MPAv1_NewWF_BGP_2_B.csv
	TaxMP_MPAv1_NewWF_BGP_2_B.csv		Eukaryota	Viridiplantae	Streptophyta	Liliopsida	Poales	Poaceae	Unknown Genus	Unknown Species	Unknown Subspecies	3	9		TaxMP_MPAv1_NewWF_BGP_2_B.csv
	TaxMP_MPAv1_NewWF_BGP_2_C.csv		Unknown Superkingdom	Unknown Kingdom	Unknown Phylum	Unknown Class	Unknown Order	Unknown Family	Unknown Genus	Unknown Species	Unknown Subspecies	2965	6015		TaxMP_MPAv1_NewWF_BGP_2_C.csv
	TaxMP_MPAv1_NewWF_BGP_2_C.csv		Bacteria	Unknown Kingdom	Chloroflexi	Chloroflexi	Herpetosiphonales	Herpetosiphonaceae	Herpetosiphon	Herpetosiphon aurantiacus	Unknown Subspecies	1	2		TaxMP_MPAv1_NewWF_BGP_2_C.csv
	TaxMP_MPAv1_NewWF_BGP_2_C.csv		Bacteria	Unknown Kingdom	Unknown Phylum	Unknown Class	Unknown Order	Unknown Family	Unknown Genus	Unknown Species	Unknown Subspecies	1	2		TaxMP_MPAv1_NewWF_BGP_2_C.csv
	TaxMP_MPAv1_NewWF_BGP_2_C.csv		Eukaryota	Viridiplantae	Unknown Phylum	Unknown Class	Unknown Order	Unknown Family	Unknown Genus	Unknown Species	Unknown Subspecies	2	4		TaxMP_MPAv1_NewWF_BGP_2_C.csv
	TaxMP_MPAv1_NewWF_BGP_2_C.csv		Bacteria	Unknown Kingdom	Actinobacteria	Actinobacteria	Actinomycetales	Streptomycetaceae	Streptomyces	Streptomyces coelicolor	Streptomyces coelicolor A3(2)	1	3		TaxMP_MPAv1_NewWF_BGP_2_C.csv
	TaxMP_MPAv1_NewWF_BGP_2_C.csv		Eukaryota	Metazoa	Chordata	Mammalia	Primates	Hominidae	Homo	Homo sapiens	Unknown Subspecies	1	1		TaxMP_MPAv1_NewWF_BGP_2_C.csv
	TaxMP_MPAv1_NewWF_BGP_2_C.csv		Eukaryota	Unknown Kingdom	Unknown Phylum	Unknown Class	Unknown Order	Unknown Family	Unknown Genus	Unknown Species	Unknown Subspecies	11	34		TaxMP_MPAv1_NewWF_BGP_2_C.csv
	TaxMP_MPAv1_NewWF_BGP_2_C.csv		Bacteria	Unknown Kingdom	Bacteroidetes	Bacteroidia	Bacteroidales	Bacteroidaceae	Bacteroides	Bacteroides thetaiotaomicron	Bacteroides thetaiotaomicron VPI-5482	2	3		TaxMP_MPAv1_NewWF_BGP_2_C.csv
	TaxMP_MPAv1_NewWF_BGP_2_C.csv		Bacteria	Unknown Kingdom	Proteobacteria	Betaproteobacteria	Burkholderiales	Unknown Family	Unknown Genus	Unknown Species	Unknown Subspecies	1	3		TaxMP_MPAv1_NewWF_BGP_2_C.csv
	TaxMP_MPAv1_NewWF_BGP_2_C.csv		Eukaryota	Fungi	Ascomycota	Dothideomycetes	Pleosporales	Phaeosphaeriaceae	Phaeosphaeria	Phaeosphaeria nodorum	Phaeosphaeria nodorum SN15	1	1		TaxMP_MPAv1_NewWF_BGP_2_C.csv
	TaxMP_MPAv1_NewWF_BGP_2_C.csv		Eukaryota	Viridiplantae	Streptophyta	Liliopsida	Poales	Poaceae	Oryza	Oryza sativa	Oryza sativa Japonica Group	2	6		TaxMP_MPAv1_NewWF_BGP_2_C.csv
	TaxMP_MPAv1_NewWF_BGP_2_C.csv		Archaea	Unknown Kingdom	Euryarchaeota	Methanomicrobia	Methanosarcinales	Methanosarcinaceae	Methanosarcina	Methanosarcina acetivorans	Methanosarcina acetivorans C2A	1	2		TaxMP_MPAv1_NewWF_BGP_2_C.csv
	TaxMP_MPAv1_NewWF_BGP_2_C.csv		Eukaryota	Viridiplantae	Chlorophyta	Ulvophyceae	Bryopsidales	Unknown Family	Unknown Genus	Unknown Species	Unknown Subspecies	1	3		TaxMP_MPAv1_NewWF_BGP_2_C.csv
	TaxMP_MPAv1_NewWF_BGP_2_C.csv		Eukaryota	Unknown Kingdom	Unknown Phylum	Unknown Class	Dictyosteliida	Unknown Family	Dictyostelium	Dictyostelium discoideum	Unknown Subspecies	1	4		TaxMP_MPAv1_NewWF_BGP_2_C.csv
	TaxMP_MPAv1_NewWF_BGP_2_C.csv		Bacteria	Unknown Kingdom	Cyanobacteria	Unknown Class	Chroococcales	Unknown Family	Cyanothece	Cyanothece sp. ATCC 51142	Unknown Subspecies	1	1		TaxMP_MPAv1_NewWF_BGP_2_C.csv
	TaxMP_MPAv1_NewWF_BGP_2_C.csv		Bacteria	Unknown Kingdom	Proteobacteria	Alphaproteobacteria	Rhizobiales	Rhizobiaceae	Sinorhizobium	Sinorhizobium meliloti	Sinorhizobium meliloti 1021	1	1		TaxMP_MPAv1_NewWF_BGP_2_C.csv
	TaxMP_MPAv1_NewWF_BGP_2_C.csv		Bacteria	Unknown Kingdom	Proteobacteria	Alphaproteobacteria	Rhizobiales	Bartonellaceae	Bartonella	Bartonella bacilliformis	Bartonella bacilliformis KC583	1	2		TaxMP_MPAv1_NewWF_BGP_2_C.csv
	TaxMP_MPAv1_NewWF_BGP_2_C.csv		Archaea	Unknown Kingdom	Euryarchaeota	Methanobacteria	Methanobacteriales	Methanobacteriaceae	Methanothermobacter	Methanothermobacter thermautotrophicus	Methanothermobacter thermautotrophicus str. Delta H	1	1		TaxMP_MPAv1_NewWF_BGP_2_C.csv
	TaxMP_MPAv1_NewWF_BGP_2_C.csv		Bacteria	Unknown Kingdom	Proteobacteria	Gammaproteobacteria	Enterobacteriales	Enterobacteriaceae	Unknown Genus	Unknown Species	Unknown Subspecies	1	1		TaxMP_MPAv1_NewWF_BGP_2_C.csv
	TaxMP_MPAv1_NewWF_BGP_2_C.csv		Archaea	Unknown Kingdom	Euryarchaeota	Methanomicrobia	Methanosarcinales	Methanosarcinaceae	Methanosarcina	Methanosarcina barkeri	Methanosarcina barkeri str. Fusaro	1	1		TaxMP_MPAv1_NewWF_BGP_2_C.csv
	TaxMP_MPAv1_NewWF_BGP_2_C.csv		Eukaryota	Viridiplantae	Streptophyta	Liliopsida	Poales	Poaceae	Zea	Zea mays	Unknown Subspecies	2	4		TaxMP_MPAv1_NewWF_BGP_2_C.csv
	TaxMP_MPAv1_NewWF_BGP_2_C.csv		Eukaryota	Metazoa	Chordata	Mammalia	Unknown Order	Unknown Family	Unknown Genus	Unknown Species	Unknown Subspecies	7	12		TaxMP_MPAv1_NewWF_BGP_2_C.csv
	TaxMP_MPAv1_NewWF_BGP_2_C.csv		Archaea	Unknown Kingdom	Euryarchaeota	Methanomicrobia	Methanosarcinales	Methanosarcinaceae	Methanosarcina	Methanosarcina thermophila	Unknown Subspecies	1	2		TaxMP_MPAv1_NewWF_BGP_2_C.csv
	TaxMP_MPAv1_NewWF_BGP_2_C.csv		Eukaryota	Viridiplantae	Streptophyta	Unknown Class	Myrtales	Onagraceae	Oenothera	Oenothera argillicola	Unknown Subspecies	1	1		TaxMP_MPAv1_NewWF_BGP_2_C.csv
	TaxMP_MPAv1_NewWF_BGP_2_C.csv		Eukaryota	Viridiplantae	Streptophyta	Unknown Class	Unknown Order	Unknown Family	Unknown Genus	Unknown Species	Unknown Subspecies	10	11		TaxMP_MPAv1_NewWF_BGP_2_C.csv
	TaxMP_MPAv1_NewWF_BGP_2_C.csv		Eukaryota	Metazoa	Chordata	Mammalia	Unknown Order	Bovidae	Unknown Genus	Unknown Species	Unknown Subspecies	1	1		TaxMP_MPAv1_NewWF_BGP_2_C.csv
	TaxMP_MPAv1_NewWF_BGP_2_C.csv		Bacteria	Unknown Kingdom	Firmicutes	Bacilli	Bacillales	Bacillaceae	Bacillus	Bacillus halodurans	Bacillus halodurans C-125	1	1		TaxMP_MPAv1_NewWF_BGP_2_C.csv
	TaxMP_MPAv1_NewWF_BGP_2_C.csv		Bacteria	Unknown Kingdom	Bacteroidetes	Bacteroidia	Bacteroidales	Bacteroidaceae	Bacteroides	Bacteroides fragilis	Bacteroides fragilis NCTC 9343	1	1		TaxMP_MPAv1_NewWF_BGP_2_C.csv
	TaxMP_MPAv1_NewWF_BGP_2_C.csv		Bacteria	Unknown Kingdom	Proteobacteria	Epsilonproteobacteria	Campylobacterales	Campylobacteraceae	Campylobacter	Campylobacter concisus	Campylobacter concisus 13826	1	1		TaxMP_MPAv1_NewWF_BGP_2_C.csv
	TaxMP_MPAv1_NewWF_BGP_2_C.csv		Bacteria	Unknown Kingdom	Firmicutes	Clostridia	Clostridiales	Syntrophomonadaceae	Syntrophomonas	Syntrophomonas wolfei subsp. wolfei str. Goettingen	Syntrophomonas wolfei subsp. wolfei	1	1		TaxMP_MPAv1_NewWF_BGP_2_C.csv
	TaxMP_MPAv1_NewWF_BGP_2_C.csv		Eukaryota	Viridiplantae	Streptophyta	Unknown Class	Solanales	Solanaceae	Solanum	Solanum lycopersicum	Unknown Subspecies	2	2		TaxMP_MPAv1_NewWF_BGP_2_C.csv
	TaxMP_MPAv1_NewWF_BGP_2_C.csv		Eukaryota	Viridiplantae	Streptophyta	Liliopsida	Poales	Poaceae	Oryza	Oryza sativa	Unknown Subspecies	1	2		TaxMP_MPAv1_NewWF_BGP_2_C.csv
	TaxMP_MPAv1_NewWF_BGP_2_C.csv		Bacteria	Unknown Kingdom	Firmicutes	Bacilli	Bacillales	Bacillaceae	Bacillus	Bacillus cereus	Unknown Subspecies	1	1		TaxMP_MPAv1_NewWF_BGP_2_C.csv
	TaxMP_MPAv1_NewWF_BGP_2_C.csv		Eukaryota	Viridiplantae	Streptophyta	Unknown Class	Nymphaeales	Nymphaeaceae	Nuphar	Nuphar advena	Unknown Subspecies	1	1		TaxMP_MPAv1_NewWF_BGP_2_C.csv
	TaxMP_MPAv1_NewWF_BGP_2_C.csv		Eukaryota	Viridiplantae	Streptophyta	Unknown Class	Brassicales	Brassicaceae	Arabidopsis	Arabidopsis thaliana	Unknown Subspecies	2	2		TaxMP_MPAv1_NewWF_BGP_2_C.csv
	TaxMP_MPAv1_NewWF_BGP_2_C.csv		Bacteria	Unknown Kingdom	Proteobacteria	Betaproteobacteria	Nitrosomonadales	Nitrosomonadaceae	Nitrosomonas	Nitrosomonas eutropha	Nitrosomonas eutropha C91	1	1		TaxMP_MPAv1_NewWF_BGP_2_C.csv
	TaxMP_MPAv1_NewWF_BGP_2_C.csv		Bacteria	Unknown Kingdom	Firmicutes	Bacilli	Bacillales	Bacillaceae	Bacillus	Bacillus subtilis subsp. subtilis str. 168	Bacillus subtilis subsp. subtilis	1	2		TaxMP_MPAv1_NewWF_BGP_2_C.csv
	TaxMP_MPAv1_NewWF_BGP_2_C.csv		Eukaryota	Metazoa	Unknown Phylum	Unknown Class	Unknown Order	Unknown Family	Unknown Genus	Unknown Species	Unknown Subspecies	1	1		TaxMP_MPAv1_NewWF_BGP_2_C.csv
	TaxMP_MPAv1_NewWF_BGP_2_C.csv		Bacteria	Unknown Kingdom	Tenericutes	Mollicutes	Mycoplasmatales	Mycoplasmataceae	Mycoplasma	Mycoplasma penetrans	Mycoplasma penetrans HF-2	1	3		TaxMP_MPAv1_NewWF_BGP_2_C.csv
	TaxMP_MPAv1_NewWF_BGP_2_C.csv		Eukaryota	Viridiplantae	Streptophyta	Liliopsida	Poales	Poaceae	Unknown Genus	Unknown Species	Unknown Subspecies	6	9		TaxMP_MPAv1_NewWF_BGP_2_C.csv
	TaxMP_MPAv1_NewWF_BGP_3_A.csv		Unknown Superkingdom	Unknown Kingdom	Unknown Phylum	Unknown Class	Unknown Order	Unknown Family	Unknown Genus	Unknown Species	Unknown Subspecies	3063	6439		TaxMP_MPAv1_NewWF_BGP_3_A.csv
	TaxMP_MPAv1_NewWF_BGP_3_A.csv		Bacteria	Unknown Kingdom	Chloroflexi	Chloroflexi	Herpetosiphonales	Herpetosiphonaceae	Herpetosiphon	Herpetosiphon aurantiacus	Unknown Subspecies	1	2		TaxMP_MPAv1_NewWF_BGP_3_A.csv
	TaxMP_MPAv1_NewWF_BGP_3_A.csv		Bacteria	Unknown Kingdom	Unknown Phylum	Unknown Class	Unknown Order	Unknown Family	Unknown Genus	Unknown Species	Unknown Subspecies	5	5		TaxMP_MPAv1_NewWF_BGP_3_A.csv
	TaxMP_MPAv1_NewWF_BGP_3_A.csv		Bacteria	Unknown Kingdom	Firmicutes	Bacilli	Lactobacillales	Streptococcaceae	Streptococcus	Streptococcus pyogenes	Streptococcus pyogenes serotype M1	1	1		TaxMP_MPAv1_NewWF_BGP_3_A.csv
	TaxMP_MPAv1_NewWF_BGP_3_A.csv		Bacteria	Unknown Kingdom	Firmicutes	Bacilli	Bacillales	Bacillaceae	Bacillus	Bacillus clausii	Bacillus clausii KSM-K16	1	1		TaxMP_MPAv1_NewWF_BGP_3_A.csv
	TaxMP_MPAv1_NewWF_BGP_3_A.csv		Bacteria	Unknown Kingdom	Spirochaetes	Spirochaetia	Spirochaetales	Spirochaetaceae	Borrelia	Borrelia burgdorferi	Borrelia burgdorferi B31	1	1		TaxMP_MPAv1_NewWF_BGP_3_A.csv
	TaxMP_MPAv1_NewWF_BGP_3_A.csv		Bacteria	Unknown Kingdom	Proteobacteria	Gammaproteobacteria	Enterobacteriales	Enterobacteriaceae	Pectobacterium	Pectobacterium carotovorum subsp. carotovorum PC1	Pectobacterium carotovorum subsp. carotovorum	1	1		TaxMP_MPAv1_NewWF_BGP_3_A.csv
	TaxMP_MPAv1_NewWF_BGP_3_A.csv		Bacteria	Unknown Kingdom	Proteobacteria	Gammaproteobacteria	Pseudomonadales	Pseudomonadaceae	Pseudomonas	Pseudomonas aeruginosa	Pseudomonas aeruginosa PAO1	1	1		TaxMP_MPAv1_NewWF_BGP_3_A.csv
	TaxMP_MPAv1_NewWF_BGP_3_A.csv		Eukaryota	Unknown Kingdom	Unknown Phylum	Unknown Class	Unknown Order	Unknown Family	Unknown Genus	Unknown Species	Unknown Subspecies	1	2		TaxMP_MPAv1_NewWF_BGP_3_A.csv
	TaxMP_MPAv1_NewWF_BGP_3_A.csv		Eukaryota	Viridiplantae	Streptophyta	Unknown Class	Solanales	Solanaceae	Petunia	Petunia sp.	Unknown Subspecies	1	1		TaxMP_MPAv1_NewWF_BGP_3_A.csv
	TaxMP_MPAv1_NewWF_BGP_3_A.csv		Bacteria	Unknown Kingdom	Proteobacteria	Unknown Class	Unknown Order	Unknown Family	Unknown Genus	Unknown Species	Unknown Subspecies	1	2		TaxMP_MPAv1_NewWF_BGP_3_A.csv
	TaxMP_MPAv1_NewWF_BGP_3_A.csv		Eukaryota	Viridiplantae	Streptophyta	Liliopsida	Poales	Poaceae	Oryza	Oryza sativa	Oryza sativa Japonica Group	4	10		TaxMP_MPAv1_NewWF_BGP_3_A.csv
	TaxMP_MPAv1_NewWF_BGP_3_A.csv		Archaea	Unknown Kingdom	Euryarchaeota	Methanomicrobia	Methanosarcinales	Methanosarcinaceae	Methanosarcina	Methanosarcina acetivorans	Methanosarcina acetivorans C2A	1	2		TaxMP_MPAv1_NewWF_BGP_3_A.csv
	TaxMP_MPAv1_NewWF_BGP_3_A.csv		Eukaryota	Viridiplantae	Streptophyta	Unknown Class	Solanales	Solanaceae	Solanum	Unknown Species	Unknown Subspecies	1	3		TaxMP_MPAv1_NewWF_BGP_3_A.csv
	TaxMP_MPAv1_NewWF_BGP_3_A.csv		Bacteria	Unknown Kingdom	Proteobacteria	Gammaproteobacteria	Vibrionales	Vibrionaceae	Vibrio	Vibrio cholerae	Vibrio cholerae O1 biovar El Tor str. N16961	1	1		TaxMP_MPAv1_NewWF_BGP_3_A.csv
	TaxMP_MPAv1_NewWF_BGP_3_A.csv		Bacteria	Unknown Kingdom	Bacteroidetes	Unknown Class	Unknown Order	Unknown Family	Unknown Genus	Unknown Species	Unknown Subspecies	2	1		TaxMP_MPAv1_NewWF_BGP_3_A.csv
	TaxMP_MPAv1_NewWF_BGP_3_A.csv		Eukaryota	Unknown Kingdom	Unknown Phylum	Unknown Class	Dictyosteliida	Unknown Family	Dictyostelium	Dictyostelium discoideum	Unknown Subspecies	1	2		TaxMP_MPAv1_NewWF_BGP_3_A.csv
	TaxMP_MPAv1_NewWF_BGP_3_A.csv		Bacteria	Unknown Kingdom	Proteobacteria	Deltaproteobacteria	Desulfovibrionales	Desulfovibrionaceae	Desulfovibrio	Desulfovibrio desulfuricans subsp. desulfuricans str. ATCC 27774	Desulfovibrio desulfuricans subsp. desulfuricans	1	1		TaxMP_MPAv1_NewWF_BGP_3_A.csv
	TaxMP_MPAv1_NewWF_BGP_3_A.csv		Bacteria	Unknown Kingdom	Firmicutes	Bacilli	Lactobacillales	Streptococcaceae	Streptococcus	Unknown Species	Unknown Subspecies	1	1		TaxMP_MPAv1_NewWF_BGP_3_A.csv
	TaxMP_MPAv1_NewWF_BGP_3_A.csv		Bacteria	Unknown Kingdom	Cyanobacteria	Unknown Class	Chroococcales	Unknown Family	Synechococcus	Synechococcus sp. CC9311	Unknown Subspecies	1	1		TaxMP_MPAv1_NewWF_BGP_3_A.csv
	TaxMP_MPAv1_NewWF_BGP_3_A.csv		Eukaryota	Viridiplantae	Streptophyta	Unknown Class	Sapindales	Rutaceae	Citrus	Citrus sinensis	Unknown Subspecies	1	2		TaxMP_MPAv1_NewWF_BGP_3_A.csv
	TaxMP_MPAv1_NewWF_BGP_3_A.csv		Bacteria	Unknown Kingdom	Firmicutes	Clostridia	Clostridiales	Clostridiaceae	Clostridium	Clostridium botulinum	Clostridium botulinum E3 str. Alaska E43	1	1		TaxMP_MPAv1_NewWF_BGP_3_A.csv
	TaxMP_MPAv1_NewWF_BGP_3_A.csv		Bacteria	Unknown Kingdom	Tenericutes	Mollicutes	Mycoplasmatales	Mycoplasmataceae	Ureaplasma	Ureaplasma parvum	Ureaplasma parvum serovar 3 str. ATCC 700970	1	1		TaxMP_MPAv1_NewWF_BGP_3_A.csv
	TaxMP_MPAv1_NewWF_BGP_3_A.csv		Bacteria	Unknown Kingdom	Proteobacteria	Betaproteobacteria	Burkholderiales	Burkholderiaceae	Ralstonia	Ralstonia solanacearum	Ralstonia solanacearum GMI1000	1	1		TaxMP_MPAv1_NewWF_BGP_3_A.csv
	TaxMP_MPAv1_NewWF_BGP_3_A.csv		Bacteria	Unknown Kingdom	Proteobacteria	Gammaproteobacteria	Enterobacteriales	Enterobacteriaceae	Unknown Genus	Unknown Species	Unknown Subspecies	1	1		TaxMP_MPAv1_NewWF_BGP_3_A.csv
	TaxMP_MPAv1_NewWF_BGP_3_A.csv		Archaea	Unknown Kingdom	Euryarchaeota	Methanomicrobia	Methanosarcinales	Methanosarcinaceae	Methanosarcina	Unknown Species	Unknown Subspecies	1	2		TaxMP_MPAv1_NewWF_BGP_3_A.csv
	TaxMP_MPAv1_NewWF_BGP_3_A.csv		Eukaryota	Viridiplantae	Streptophyta	Liliopsida	Poales	Poaceae	Zea	Zea mays	Unknown Subspecies	5	20		TaxMP_MPAv1_NewWF_BGP_3_A.csv
	TaxMP_MPAv1_NewWF_BGP_3_A.csv		Bacteria	Unknown Kingdom	Proteobacteria	Alphaproteobacteria	Rickettsiales	Anaplasmataceae	Ehrlichia	Ehrlichia ruminantium	Ehrlichia ruminantium str. Welgevonden	1	1		TaxMP_MPAv1_NewWF_BGP_3_A.csv
	TaxMP_MPAv1_NewWF_BGP_3_A.csv		Archaea	Unknown Kingdom	Euryarchaeota	Methanomicrobia	Methanosarcinales	Methanosarcinaceae	Methanosarcina	Methanosarcina thermophila	Unknown Subspecies	2	3		TaxMP_MPAv1_NewWF_BGP_3_A.csv
	TaxMP_MPAv1_NewWF_BGP_3_A.csv		Eukaryota	Metazoa	Chordata	Mammalia	Unknown Order	Unknown Family	Unknown Genus	Unknown Species	Unknown Subspecies	1	2		TaxMP_MPAv1_NewWF_BGP_3_A.csv
	TaxMP_MPAv1_NewWF_BGP_3_A.csv		Bacteria	Unknown Kingdom	Fusobacteria	Fusobacteriia	Fusobacteriales	Fusobacteriaceae	Fusobacterium	Fusobacterium nucleatum subsp. nucleatum ATCC 25586	Fusobacterium nucleatum subsp. nucleatum	1	1		TaxMP_MPAv1_NewWF_BGP_3_A.csv
	TaxMP_MPAv1_NewWF_BGP_3_A.csv		Eukaryota	Viridiplantae	Streptophyta	Unknown Class	Unknown Order	Unknown Family	Unknown Genus	Unknown Species	Unknown Subspecies	25	48		TaxMP_MPAv1_NewWF_BGP_3_A.csv
	TaxMP_MPAv1_NewWF_BGP_3_A.csv		Bacteria	Unknown Kingdom	Proteobacteria	Gammaproteobacteria	Enterobacteriales	Enterobacteriaceae	Serratia	Unknown Species	Unknown Subspecies	1	2		TaxMP_MPAv1_NewWF_BGP_3_A.csv
	TaxMP_MPAv1_NewWF_BGP_3_A.csv		Bacteria	Unknown Kingdom	Bacteroidetes	Flavobacteriia	Flavobacteriales	Flavobacteriaceae	Flavobacterium	Flavobacterium johnsoniae	Flavobacterium johnsoniae UW101	1	1		TaxMP_MPAv1_NewWF_BGP_3_A.csv
	TaxMP_MPAv1_NewWF_BGP_3_A.csv		Archaea	Unknown Kingdom	Euryarchaeota	Methanobacteria	Methanobacteriales	Methanobacteriaceae	Methanothermobacter	Unknown Species	Unknown Subspecies	1	1		TaxMP_MPAv1_NewWF_BGP_3_A.csv
	TaxMP_MPAv1_NewWF_BGP_3_A.csv		Eukaryota	Viridiplantae	Streptophyta	Unknown Class	Solanales	Solanaceae	Solanum	Solanum lycopersicum	Unknown Subspecies	1	2		TaxMP_MPAv1_NewWF_BGP_3_A.csv
	TaxMP_MPAv1_NewWF_BGP_3_A.csv		Bacteria	Unknown Kingdom	Proteobacteria	Alphaproteobacteria	Unknown Order	Unknown Family	Unknown Genus	Unknown Species	Unknown Subspecies	2	2		TaxMP_MPAv1_NewWF_BGP_3_A.csv
	TaxMP_MPAv1_NewWF_BGP_3_A.csv		Eukaryota	Fungi	Ascomycota	Saccharomycetes	Saccharomycetales	Saccharomycetaceae	Saccharomyces	Saccharomyces cerevisiae	Saccharomyces cerevisiae S288c	1	1		TaxMP_MPAv1_NewWF_BGP_3_A.csv
	TaxMP_MPAv1_NewWF_BGP_3_A.csv		Archaea	Unknown Kingdom	Euryarchaeota	Methanomicrobia	Methanomicrobiales	Methanoregulaceae	Methanosphaerula	Methanosphaerula palustris	Methanosphaerula palustris E1-9c	1	2		TaxMP_MPAv1_NewWF_BGP_3_A.csv
	TaxMP_MPAv1_NewWF_BGP_3_A.csv		Bacteria	Unknown Kingdom	Firmicutes	Bacilli	Unknown Order	Unknown Family	Unknown Genus	Unknown Species	Unknown Subspecies	1	2		TaxMP_MPAv1_NewWF_BGP_3_A.csv
	TaxMP_MPAv1_NewWF_BGP_3_A.csv		Bacteria	Unknown Kingdom	Actinobacteria	Actinobacteria	Actinomycetales	Micrococcaceae	Micrococcus	Micrococcus luteus	Unknown Subspecies	1	1		TaxMP_MPAv1_NewWF_BGP_3_A.csv
	TaxMP_MPAv1_NewWF_BGP_3_A.csv		Eukaryota	Viridiplantae	Streptophyta	Unknown Class	Malpighiales	Salicaceae	Populus	Populus euphratica	Unknown Subspecies	1	1		TaxMP_MPAv1_NewWF_BGP_3_A.csv
	TaxMP_MPAv1_NewWF_BGP_3_A.csv		Eukaryota	Viridiplantae	Streptophyta	Coniferopsida	Coniferales	Pinaceae	Abies	Unknown Species	Unknown Subspecies	1	1		TaxMP_MPAv1_NewWF_BGP_3_A.csv
	TaxMP_MPAv1_NewWF_BGP_3_A.csv		Archaea	Unknown Kingdom	Euryarchaeota	Methanomicrobia	Methanosarcinales	Methanosarcinaceae	Methanosarcina	Methanosarcina mazei	Methanosarcina mazei Go1	2	3		TaxMP_MPAv1_NewWF_BGP_3_A.csv
	TaxMP_MPAv1_NewWF_BGP_3_A.csv		Bacteria	Unknown Kingdom	Tenericutes	Mollicutes	Mycoplasmatales	Mycoplasmataceae	Mycoplasma	Mycoplasma penetrans	Mycoplasma penetrans HF-2	1	1		TaxMP_MPAv1_NewWF_BGP_3_A.csv
	TaxMP_MPAv1_NewWF_BGP_3_A.csv		Eukaryota	Viridiplantae	Streptophyta	Liliopsida	Poales	Poaceae	Unknown Genus	Unknown Species	Unknown Subspecies	6	12		TaxMP_MPAv1_NewWF_BGP_3_A.csv
	TaxMP_MPAv1_NewWF_BGP_3_B.csv		Unknown Superkingdom	Unknown Kingdom	Unknown Phylum	Unknown Class	Unknown Order	Unknown Family	Unknown Genus	Unknown Species	Unknown Subspecies	2615	5416		TaxMP_MPAv1_NewWF_BGP_3_B.csv
	TaxMP_MPAv1_NewWF_BGP_3_B.csv		Bacteria	Unknown Kingdom	Chloroflexi	Chloroflexi	Herpetosiphonales	Herpetosiphonaceae	Herpetosiphon	Herpetosiphon aurantiacus	Unknown Subspecies	1	2		TaxMP_MPAv1_NewWF_BGP_3_B.csv
	TaxMP_MPAv1_NewWF_BGP_3_B.csv		Bacteria	Unknown Kingdom	Firmicutes	Bacilli	Lactobacillales	Lactobacillaceae	Lactobacillus	Lactobacillus salivarius	Lactobacillus salivarius UCC118	1	2		TaxMP_MPAv1_NewWF_BGP_3_B.csv
	TaxMP_MPAv1_NewWF_BGP_3_B.csv		Eukaryota	Viridiplantae	Streptophyta	Marattiopsida	Marattiales	Marattiaceae	Angiopteris	Angiopteris evecta	Unknown Subspecies	1	1		TaxMP_MPAv1_NewWF_BGP_3_B.csv
	TaxMP_MPAv1_NewWF_BGP_3_B.csv		Bacteria	Unknown Kingdom	Firmicutes	Bacilli	Bacillales	Listeriaceae	Listeria	Listeria monocytogenes	Listeria monocytogenes serotype 4b str. F2365	1	1		TaxMP_MPAv1_NewWF_BGP_3_B.csv
	TaxMP_MPAv1_NewWF_BGP_3_B.csv		Bacteria	Unknown Kingdom	Unknown Phylum	Unknown Class	Unknown Order	Unknown Family	Unknown Genus	Unknown Species	Unknown Subspecies	4	2		TaxMP_MPAv1_NewWF_BGP_3_B.csv
	TaxMP_MPAv1_NewWF_BGP_3_B.csv		Eukaryota	Viridiplantae	Unknown Phylum	Unknown Class	Unknown Order	Unknown Family	Unknown Genus	Unknown Species	Unknown Subspecies	7	31		TaxMP_MPAv1_NewWF_BGP_3_B.csv
	TaxMP_MPAv1_NewWF_BGP_3_B.csv		Eukaryota	Metazoa	Chordata	Mammalia	Rodentia	Muridae	Rattus	Rattus norvegicus	Unknown Subspecies	2	2		TaxMP_MPAv1_NewWF_BGP_3_B.csv
	TaxMP_MPAv1_NewWF_BGP_3_B.csv		Bacteria	Unknown Kingdom	Cyanobacteria	Unknown Class	Prochlorales	Prochlorococcaceae	Prochlorococcus	Prochlorococcus marinus	Prochlorococcus marinus str. MIT 9215	1	1		TaxMP_MPAv1_NewWF_BGP_3_B.csv
	TaxMP_MPAv1_NewWF_BGP_3_B.csv		Bacteria	Unknown Kingdom	Firmicutes	Clostridia	Clostridiales	Clostridiaceae	Alkaliphilus	Alkaliphilus metalliredigens	Alkaliphilus metalliredigens QYMF	1	1		TaxMP_MPAv1_NewWF_BGP_3_B.csv
	TaxMP_MPAv1_NewWF_BGP_3_B.csv		Eukaryota	Metazoa	Chordata	Mammalia	Primates	Hominidae	Homo	Homo sapiens	Unknown Subspecies	1	1		TaxMP_MPAv1_NewWF_BGP_3_B.csv
	TaxMP_MPAv1_NewWF_BGP_3_B.csv		Bacteria	Unknown Kingdom	Chloroflexi	Chloroflexi	Chloroflexales	Chloroflexaceae	Roseiflexus	Roseiflexus castenholzii	Roseiflexus castenholzii DSM 13941	1	1		TaxMP_MPAv1_NewWF_BGP_3_B.csv
	TaxMP_MPAv1_NewWF_BGP_3_B.csv		Eukaryota	Fungi	Ascomycota	Dothideomycetes	Pleosporales	Phaeosphaeriaceae	Phaeosphaeria	Phaeosphaeria nodorum	Phaeosphaeria nodorum SN15	1	1		TaxMP_MPAv1_NewWF_BGP_3_B.csv
	TaxMP_MPAv1_NewWF_BGP_3_B.csv		Bacteria	Unknown Kingdom	Proteobacteria	Epsilonproteobacteria	Nautiliales	Nautiliaceae	Nautilia	Nautilia profundicola	Nautilia profundicola AmH	1	2		TaxMP_MPAv1_NewWF_BGP_3_B.csv
	TaxMP_MPAv1_NewWF_BGP_3_B.csv		Eukaryota	Viridiplantae	Streptophyta	Liliopsida	Poales	Poaceae	Oryza	Oryza sativa	Oryza sativa Japonica Group	4	6		TaxMP_MPAv1_NewWF_BGP_3_B.csv
	TaxMP_MPAv1_NewWF_BGP_3_B.csv		Archaea	Unknown Kingdom	Euryarchaeota	Methanomicrobia	Methanosarcinales	Methanosarcinaceae	Methanosarcina	Methanosarcina acetivorans	Methanosarcina acetivorans C2A	1	1		TaxMP_MPAv1_NewWF_BGP_3_B.csv
	TaxMP_MPAv1_NewWF_BGP_3_B.csv		Bacteria	Unknown Kingdom	Proteobacteria	Gammaproteobacteria	Enterobacteriales	Enterobacteriaceae	Edwardsiella	Edwardsiella ictaluri	Edwardsiella ictaluri 93-146	1	1		TaxMP_MPAv1_NewWF_BGP_3_B.csv
	TaxMP_MPAv1_NewWF_BGP_3_B.csv		Bacteria	Unknown Kingdom	Bacteroidetes	Unknown Class	Unknown Order	Unknown Family	Unknown Genus	Unknown Species	Unknown Subspecies	2	1		TaxMP_MPAv1_NewWF_BGP_3_B.csv
	TaxMP_MPAv1_NewWF_BGP_3_B.csv		Eukaryota	Unknown Kingdom	Unknown Phylum	Unknown Class	Dictyosteliida	Unknown Family	Dictyostelium	Dictyostelium discoideum	Unknown Subspecies	2	4		TaxMP_MPAv1_NewWF_BGP_3_B.csv
	TaxMP_MPAv1_NewWF_BGP_3_B.csv		Bacteria	Unknown Kingdom	Firmicutes	Clostridia	Clostridiales	Clostridiaceae	Clostridium	Clostridium botulinum	Unknown Subspecies	1	1		TaxMP_MPAv1_NewWF_BGP_3_B.csv
	TaxMP_MPAv1_NewWF_BGP_3_B.csv		Bacteria	Unknown Kingdom	Firmicutes	Bacilli	Lactobacillales	Streptococcaceae	Streptococcus	Unknown Species	Unknown Subspecies	1	1		TaxMP_MPAv1_NewWF_BGP_3_B.csv
	TaxMP_MPAv1_NewWF_BGP_3_B.csv		Bacteria	Unknown Kingdom	Firmicutes	Clostridia	Clostridiales	Clostridiaceae	Clostridium	Clostridium perfringens	Clostridium perfringens str. 13	1	1		TaxMP_MPAv1_NewWF_BGP_3_B.csv
	TaxMP_MPAv1_NewWF_BGP_3_B.csv		Bacteria	Unknown Kingdom	Deinococcus-Thermus	Deinococci	Deinococcales	Deinococcaceae	Deinococcus	Deinococcus radiodurans	Deinococcus radiodurans R1	1	1		TaxMP_MPAv1_NewWF_BGP_3_B.csv
	TaxMP_MPAv1_NewWF_BGP_3_B.csv		Bacteria	Unknown Kingdom	Proteobacteria	Alphaproteobacteria	Rhodobacterales	Rhodobacteraceae	Roseobacter	Roseobacter denitrificans	Roseobacter denitrificans OCh 114	1	1		TaxMP_MPAv1_NewWF_BGP_3_B.csv
	TaxMP_MPAv1_NewWF_BGP_3_B.csv		Archaea	Unknown Kingdom	Euryarchaeota	Methanomicrobia	Methanosarcinales	Methanosarcinaceae	Methanosarcina	Unknown Species	Unknown Subspecies	2	5		TaxMP_MPAv1_NewWF_BGP_3_B.csv
	TaxMP_MPAv1_NewWF_BGP_3_B.csv		Bacteria	Unknown Kingdom	Proteobacteria	Gammaproteobacteria	Enterobacteriales	Enterobacteriaceae	Unknown Genus	Unknown Species	Unknown Subspecies	1	2		TaxMP_MPAv1_NewWF_BGP_3_B.csv
	TaxMP_MPAv1_NewWF_BGP_3_B.csv		Eukaryota	Viridiplantae	Streptophyta	Liliopsida	Poales	Poaceae	Zea	Zea mays	Unknown Subspecies	3	14		TaxMP_MPAv1_NewWF_BGP_3_B.csv
	TaxMP_MPAv1_NewWF_BGP_3_B.csv		Eukaryota	Viridiplantae	Streptophyta	Unknown Class	Solanales	Solanaceae	Solanum	Solanum sogarandinum	Unknown Subspecies	1	2		TaxMP_MPAv1_NewWF_BGP_3_B.csv
	TaxMP_MPAv1_NewWF_BGP_3_B.csv		Bacteria	Unknown Kingdom	Proteobacteria	Deltaproteobacteria	Myxococcales	Myxococcaceae	Myxococcus	Myxococcus xanthus	Unknown Subspecies	1	1		TaxMP_MPAv1_NewWF_BGP_3_B.csv
	TaxMP_MPAv1_NewWF_BGP_3_B.csv		Eukaryota	Metazoa	Chordata	Mammalia	Unknown Order	Unknown Family	Unknown Genus	Unknown Species	Unknown Subspecies	9	9		TaxMP_MPAv1_NewWF_BGP_3_B.csv
	TaxMP_MPAv1_NewWF_BGP_3_B.csv		Archaea	Unknown Kingdom	Euryarchaeota	Methanomicrobia	Methanosarcinales	Methanosarcinaceae	Methanosarcina	Methanosarcina thermophila	Unknown Subspecies	1	2		TaxMP_MPAv1_NewWF_BGP_3_B.csv
	TaxMP_MPAv1_NewWF_BGP_3_B.csv		Archaea	Unknown Kingdom	Euryarchaeota	Methanococci	Methanococcales	Methanocaldococcaceae	Methanocaldococcus	Methanocaldococcus jannaschii	Methanocaldococcus jannaschii DSM 2661	1	1		TaxMP_MPAv1_NewWF_BGP_3_B.csv
	TaxMP_MPAv1_NewWF_BGP_3_B.csv		Bacteria	Unknown Kingdom	Proteobacteria	Alphaproteobacteria	Rhizobiales	Unknown Family	Unknown Genus	Unknown Species	Unknown Subspecies	1	2		TaxMP_MPAv1_NewWF_BGP_3_B.csv
	TaxMP_MPAv1_NewWF_BGP_3_B.csv		Eukaryota	Viridiplantae	Streptophyta	Unknown Class	Unknown Order	Unknown Family	Unknown Genus	Unknown Species	Unknown Subspecies	18	21		TaxMP_MPAv1_NewWF_BGP_3_B.csv
	TaxMP_MPAv1_NewWF_BGP_3_B.csv		Bacteria	Unknown Kingdom	Proteobacteria	Epsilonproteobacteria	Campylobacterales	Helicobacteraceae	Wolinella	Wolinella succinogenes	Wolinella succinogenes DSM 1740	1	1		TaxMP_MPAv1_NewWF_BGP_3_B.csv
	TaxMP_MPAv1_NewWF_BGP_3_B.csv		Bacteria	Unknown Kingdom	Proteobacteria	Gammaproteobacteria	Enterobacteriales	Enterobacteriaceae	Serratia	Unknown Species	Unknown Subspecies	1	1		TaxMP_MPAv1_NewWF_BGP_3_B.csv
	TaxMP_MPAv1_NewWF_BGP_3_B.csv		Eukaryota	Metazoa	Chordata	Mammalia	Unknown Order	Bovidae	Unknown Genus	Unknown Species	Unknown Subspecies	1	1		TaxMP_MPAv1_NewWF_BGP_3_B.csv
	TaxMP_MPAv1_NewWF_BGP_3_B.csv		Bacteria	Unknown Kingdom	Proteobacteria	Gammaproteobacteria	Enterobacteriales	Enterobacteriaceae	Shigella	Shigella boydii	Shigella boydii Sb227	1	1		TaxMP_MPAv1_NewWF_BGP_3_B.csv
	TaxMP_MPAv1_NewWF_BGP_3_B.csv		Bacteria	Unknown Kingdom	Proteobacteria	Alphaproteobacteria	Rickettsiales	Rickettsiaceae	Rickettsia	Rickettsia canadensis	Rickettsia canadensis str. McKiel	1	1		TaxMP_MPAv1_NewWF_BGP_3_B.csv
	TaxMP_MPAv1_NewWF_BGP_3_B.csv		Eukaryota	Viridiplantae	Streptophyta	Liliopsida	Poales	Poaceae	Oryza	Oryza sativa	Unknown Subspecies	1	1		TaxMP_MPAv1_NewWF_BGP_3_B.csv
	TaxMP_MPAv1_NewWF_BGP_3_B.csv		Bacteria	Unknown Kingdom	Actinobacteria	Actinobacteria	Actinomycetales	Micrococcaceae	Unknown Genus	Unknown Species	Unknown Subspecies	1	2		TaxMP_MPAv1_NewWF_BGP_3_B.csv
	TaxMP_MPAv1_NewWF_BGP_3_B.csv		Bacteria	Unknown Kingdom	Firmicutes	Bacilli	Unknown Order	Unknown Family	Unknown Genus	Unknown Species	Unknown Subspecies	1	1		TaxMP_MPAv1_NewWF_BGP_3_B.csv
	TaxMP_MPAv1_NewWF_BGP_3_B.csv		Bacteria	Unknown Kingdom	Firmicutes	Bacilli	Bacillales	Bacillaceae	Bacillus	Bacillus cereus	Bacillus cereus ATCC 10987	1	1		TaxMP_MPAv1_NewWF_BGP_3_B.csv
	TaxMP_MPAv1_NewWF_BGP_3_B.csv		Viruses	Unknown Kingdom	Unknown Phylum	Unknown Class	Herpesvirales	Herpesviridae	Simplexvirus	Human herpesvirus 1	Herpes simplex virus (type 1 / strain 17)	1	1		TaxMP_MPAv1_NewWF_BGP_3_B.csv
	TaxMP_MPAv1_NewWF_BGP_3_B.csv		Eukaryota	Metazoa	Arthropoda	Insecta	Diptera	Drosophilidae	Drosophila	Drosophila melanogaster	Unknown Subspecies	1	1		TaxMP_MPAv1_NewWF_BGP_3_B.csv
	TaxMP_MPAv1_NewWF_BGP_3_B.csv		Archaea	Unknown Kingdom	Euryarchaeota	Methanomicrobia	Methanomicrobiales	Methanoregulaceae	Methanoregula	Methanoregula boonei	Methanoregula boonei 6A8	1	1		TaxMP_MPAv1_NewWF_BGP_3_B.csv
	TaxMP_MPAv1_NewWF_BGP_3_B.csv		Eukaryota	Viridiplantae	Streptophyta	Liliopsida	Poales	Poaceae	Unknown Genus	Unknown Species	Unknown Subspecies	4	10		TaxMP_MPAv1_NewWF_BGP_3_B.csv
	TaxMP_MPAv1_NewWF_BGP_3_C.csv		Unknown Superkingdom	Unknown Kingdom	Unknown Phylum	Unknown Class	Unknown Order	Unknown Family	Unknown Genus	Unknown Species	Unknown Subspecies	2316	4504		TaxMP_MPAv1_NewWF_BGP_3_C.csv
	TaxMP_MPAv1_NewWF_BGP_3_C.csv		Bacteria	Unknown Kingdom	Chloroflexi	Chloroflexi	Herpetosiphonales	Herpetosiphonaceae	Herpetosiphon	Herpetosiphon aurantiacus	Unknown Subspecies	1	1		TaxMP_MPAv1_NewWF_BGP_3_C.csv
	TaxMP_MPAv1_NewWF_BGP_3_C.csv		Bacteria	Unknown Kingdom	Proteobacteria	Gammaproteobacteria	Enterobacteriales	Enterobacteriaceae	Photorhabdus	Photorhabdus luminescens subsp. laumondii TTO1	Photorhabdus luminescens subsp. laumondii	1	1		TaxMP_MPAv1_NewWF_BGP_3_C.csv
	TaxMP_MPAv1_NewWF_BGP_3_C.csv		Bacteria	Unknown Kingdom	Unknown Phylum	Unknown Class	Unknown Order	Unknown Family	Unknown Genus	Unknown Species	Unknown Subspecies	3	2		TaxMP_MPAv1_NewWF_BGP_3_C.csv
	TaxMP_MPAv1_NewWF_BGP_3_C.csv		Bacteria	Unknown Kingdom	Proteobacteria	Gammaproteobacteria	Pseudomonadales	Pseudomonadaceae	Pseudomonas	Pseudomonas aeruginosa	Pseudomonas aeruginosa PAO1	1	1		TaxMP_MPAv1_NewWF_BGP_3_C.csv
	TaxMP_MPAv1_NewWF_BGP_3_C.csv		Eukaryota	Unknown Kingdom	Unknown Phylum	Unknown Class	Unknown Order	Unknown Family	Unknown Genus	Unknown Species	Unknown Subspecies	8	27		TaxMP_MPAv1_NewWF_BGP_3_C.csv
	TaxMP_MPAv1_NewWF_BGP_3_C.csv		Archaea	Unknown Kingdom	Euryarchaeota	Thermoplasmata	Thermoplasmatales	Picrophilaceae	Picrophilus	Picrophilus torridus	Picrophilus torridus DSM 9790	1	1		TaxMP_MPAv1_NewWF_BGP_3_C.csv
	TaxMP_MPAv1_NewWF_BGP_3_C.csv		Bacteria	Unknown Kingdom	Proteobacteria	Gammaproteobacteria	Enterobacteriales	Enterobacteriaceae	Proteus	Proteus mirabilis	Unknown Subspecies	1	1		TaxMP_MPAv1_NewWF_BGP_3_C.csv
	TaxMP_MPAv1_NewWF_BGP_3_C.csv		Bacteria	Unknown Kingdom	Spirochaetes	Spirochaetia	Spirochaetales	Spirochaetaceae	Borrelia	Unknown Species	Unknown Subspecies	1	2		TaxMP_MPAv1_NewWF_BGP_3_C.csv
	TaxMP_MPAv1_NewWF_BGP_3_C.csv		Eukaryota	Viridiplantae	Streptophyta	Liliopsida	Poales	Poaceae	Oryza	Oryza sativa	Oryza sativa Japonica Group	3	3		TaxMP_MPAv1_NewWF_BGP_3_C.csv
	TaxMP_MPAv1_NewWF_BGP_3_C.csv		Bacteria	Unknown Kingdom	Cyanobacteria	Unknown Class	Nostocales	Nostocaceae	Nostoc	Nostoc sp. PCC 7120	Unknown Subspecies	1	1		TaxMP_MPAv1_NewWF_BGP_3_C.csv
	TaxMP_MPAv1_NewWF_BGP_3_C.csv		Eukaryota	Unknown Kingdom	Unknown Phylum	Unknown Class	Dictyosteliida	Unknown Family	Dictyostelium	Dictyostelium discoideum	Unknown Subspecies	1	2		TaxMP_MPAv1_NewWF_BGP_3_C.csv
	TaxMP_MPAv1_NewWF_BGP_3_C.csv		Archaea	Unknown Kingdom	Euryarchaeota	Unknown Class	Unknown Order	Unknown Family	Unknown Genus	Unknown Species	Unknown Subspecies	3	3		TaxMP_MPAv1_NewWF_BGP_3_C.csv
	TaxMP_MPAv1_NewWF_BGP_3_C.csv		Bacteria	Unknown Kingdom	Firmicutes	Clostridia	Clostridiales	Clostridiaceae	Clostridium	Clostridium perfringens	Clostridium perfringens str. 13	1	1		TaxMP_MPAv1_NewWF_BGP_3_C.csv
	TaxMP_MPAv1_NewWF_BGP_3_C.csv		Archaea	Unknown Kingdom	Euryarchaeota	Methanomicrobia	Methanosarcinales	Methanosarcinaceae	Methanosarcina	Unknown Species	Unknown Subspecies	1	1		TaxMP_MPAv1_NewWF_BGP_3_C.csv
	TaxMP_MPAv1_NewWF_BGP_3_C.csv		Bacteria	Unknown Kingdom	Firmicutes	Bacilli	Bacillales	Bacillaceae	Bacillus	Bacillus cereus	Bacillus cereus 03BB102	1	1		TaxMP_MPAv1_NewWF_BGP_3_C.csv
	TaxMP_MPAv1_NewWF_BGP_3_C.csv		Eukaryota	Viridiplantae	Streptophyta	Liliopsida	Poales	Poaceae	Zea	Zea mays	Unknown Subspecies	3	6		TaxMP_MPAv1_NewWF_BGP_3_C.csv
	TaxMP_MPAv1_NewWF_BGP_3_C.csv		Eukaryota	Metazoa	Chordata	Mammalia	Unknown Order	Unknown Family	Unknown Genus	Unknown Species	Unknown Subspecies	5	5		TaxMP_MPAv1_NewWF_BGP_3_C.csv
	TaxMP_MPAv1_NewWF_BGP_3_C.csv		Eukaryota	Viridiplantae	Streptophyta	Unknown Class	Unknown Order	Unknown Family	Unknown Genus	Unknown Species	Unknown Subspecies	17	23		TaxMP_MPAv1_NewWF_BGP_3_C.csv
	TaxMP_MPAv1_NewWF_BGP_3_C.csv		Bacteria	Unknown Kingdom	Proteobacteria	Gammaproteobacteria	Enterobacteriales	Enterobacteriaceae	Serratia	Serratia marcescens	Unknown Subspecies	1	1		TaxMP_MPAv1_NewWF_BGP_3_C.csv
	TaxMP_MPAv1_NewWF_BGP_3_C.csv		Bacteria	Unknown Kingdom	Firmicutes	Bacilli	Bacillales	Bacillaceae	Bacillus	Unknown Species	Unknown Subspecies	2	1		TaxMP_MPAv1_NewWF_BGP_3_C.csv
	TaxMP_MPAv1_NewWF_BGP_3_C.csv		Bacteria	Unknown Kingdom	Bacteroidetes	Flavobacteriia	Flavobacteriales	Flavobacteriaceae	Flavobacterium	Flavobacterium johnsoniae	Flavobacterium johnsoniae UW101	1	1		TaxMP_MPAv1_NewWF_BGP_3_C.csv
	TaxMP_MPAv1_NewWF_BGP_3_C.csv		Bacteria	Unknown Kingdom	Firmicutes	Clostridia	Clostridiales	Peptococcaceae	Desulfitobacterium	Desulfitobacterium hafniense	Desulfitobacterium hafniense DCB-2	1	2		TaxMP_MPAv1_NewWF_BGP_3_C.csv
	TaxMP_MPAv1_NewWF_BGP_3_C.csv		Eukaryota	Viridiplantae	Streptophyta	Unknown Class	Solanales	Solanaceae	Solanum	Solanum lycopersicum	Unknown Subspecies	1	1		TaxMP_MPAv1_NewWF_BGP_3_C.csv
	TaxMP_MPAv1_NewWF_BGP_3_C.csv		Eukaryota	Fungi	Ascomycota	Saccharomycetes	Saccharomycetales	Saccharomycetaceae	Saccharomyces	Saccharomyces cerevisiae	Saccharomyces cerevisiae S288c	1	1		TaxMP_MPAv1_NewWF_BGP_3_C.csv
	TaxMP_MPAv1_NewWF_BGP_3_C.csv		Bacteria	Unknown Kingdom	Firmicutes	Bacilli	Unknown Order	Unknown Family	Unknown Genus	Unknown Species	Unknown Subspecies	1	2		TaxMP_MPAv1_NewWF_BGP_3_C.csv
	TaxMP_MPAv1_NewWF_BGP_3_C.csv		Bacteria	Unknown Kingdom	Proteobacteria	Gammaproteobacteria	Enterobacteriales	Enterobacteriaceae	Escherichia	Escherichia hermannii	Unknown Subspecies	1	1		TaxMP_MPAv1_NewWF_BGP_3_C.csv
	TaxMP_MPAv1_NewWF_BGP_3_C.csv		Eukaryota	Viridiplantae	Streptophyta	Unknown Class	Brassicales	Brassicaceae	Arabidopsis	Arabidopsis thaliana	Unknown Subspecies	2	2		TaxMP_MPAv1_NewWF_BGP_3_C.csv
	TaxMP_MPAv1_NewWF_BGP_3_C.csv		Bacteria	Unknown Kingdom	Firmicutes	Clostridia	Clostridiales	Peptostreptococcaceae	Unknown Genus	[Clostridium] difficile	Clostridium difficile 630	1	1		TaxMP_MPAv1_NewWF_BGP_3_C.csv
	TaxMP_MPAv1_NewWF_BGP_3_C.csv		Archaea	Unknown Kingdom	Euryarchaeota	Methanomicrobia	Methanomicrobiales	Methanoregulaceae	Methanoregula	Methanoregula boonei	Methanoregula boonei 6A8	1	1		TaxMP_MPAv1_NewWF_BGP_3_C.csv
	TaxMP_MPAv1_NewWF_BGP_3_C.csv		Bacteria	Unknown Kingdom	Tenericutes	Mollicutes	Mycoplasmatales	Mycoplasmataceae	Mycoplasma	Mycoplasma penetrans	Mycoplasma penetrans HF-2	1	2		TaxMP_MPAv1_NewWF_BGP_3_C.csv
	TaxMP_MPAv1_NewWF_BGP_3_C.csv		Eukaryota	Viridiplantae	Streptophyta	Liliopsida	Poales	Poaceae	Unknown Genus	Unknown Species	Unknown Subspecies	4	10		TaxMP_MPAv1_NewWF_BGP_3_C.csv
	TaxMP_MPAv1_NewWF_Hgut_1_A.csv		Bacteria	Unknown Kingdom	Bacteroidetes	Bacteroidia	Bacteroidales	Bacteroidaceae	Bacteroides	Bacteroides vulgatus	Bacteroides vulgatus ATCC 8482	1	2		TaxMP_MPAv1_NewWF_Hgut_1_A.csv
	TaxMP_MPAv1_NewWF_Hgut_1_A.csv		Unknown Superkingdom	Unknown Kingdom	Unknown Phylum	Unknown Class	Unknown Order	Unknown Family	Unknown Genus	Unknown Species	Unknown Subspecies	1627	2608		TaxMP_MPAv1_NewWF_Hgut_1_A.csv
	TaxMP_MPAv1_NewWF_Hgut_1_A.csv		Bacteria	Unknown Kingdom	Bacteroidetes	Bacteroidia	Bacteroidales	Porphyromonadaceae	Parabacteroides	Parabacteroides distasonis	Parabacteroides distasonis ATCC 8503	1	1		TaxMP_MPAv1_NewWF_Hgut_1_A.csv
	TaxMP_MPAv1_NewWF_Hgut_1_A.csv		Bacteria	Unknown Kingdom	Unknown Phylum	Unknown Class	Unknown Order	Unknown Family	Unknown Genus	Unknown Species	Unknown Subspecies	5	9		TaxMP_MPAv1_NewWF_Hgut_1_A.csv
	TaxMP_MPAv1_NewWF_Hgut_1_A.csv		Eukaryota	Metazoa	Chordata	Mammalia	Primates	Hominidae	Unknown Genus	Unknown Species	Unknown Subspecies	4	5		TaxMP_MPAv1_NewWF_Hgut_1_A.csv
	TaxMP_MPAv1_NewWF_Hgut_1_A.csv		Eukaryota	Metazoa	Chordata	Mammalia	Primates	Cercopithecidae	Macaca	Macaca fascicularis	Unknown Subspecies	2	3		TaxMP_MPAv1_NewWF_Hgut_1_A.csv
	TaxMP_MPAv1_NewWF_Hgut_1_A.csv		Eukaryota	Metazoa	Chordata	Mammalia	Primates	Hominidae	Homo	Homo sapiens	Unknown Subspecies	16	21		TaxMP_MPAv1_NewWF_Hgut_1_A.csv
	TaxMP_MPAv1_NewWF_Hgut_1_A.csv		Eukaryota	Metazoa	Chordata	Aves	Galliformes	Phasianidae	Gallus	Gallus gallus	Unknown Subspecies	10	15		TaxMP_MPAv1_NewWF_Hgut_1_A.csv
	TaxMP_MPAv1_NewWF_Hgut_1_A.csv		Eukaryota	Unknown Kingdom	Unknown Phylum	Unknown Class	Unknown Order	Unknown Family	Unknown Genus	Unknown Species	Unknown Subspecies	7	7		TaxMP_MPAv1_NewWF_Hgut_1_A.csv
	TaxMP_MPAv1_NewWF_Hgut_1_A.csv		Bacteria	Unknown Kingdom	Bacteroidetes	Bacteroidia	Bacteroidales	Porphyromonadaceae	Porphyromonas	Porphyromonas gingivalis	Porphyromonas gingivalis ATCC 33277	1	1		TaxMP_MPAv1_NewWF_Hgut_1_A.csv
	TaxMP_MPAv1_NewWF_Hgut_1_A.csv		Eukaryota	Viridiplantae	Streptophyta	Unknown Class	Proteales	Platanaceae	Platanus	Platanus orientalis	Unknown Subspecies	1	1		TaxMP_MPAv1_NewWF_Hgut_1_A.csv
	TaxMP_MPAv1_NewWF_Hgut_1_A.csv		Eukaryota	Viridiplantae	Streptophyta	Unknown Class	Solanales	Solanaceae	Solanum	Solanum tuberosum	Unknown Subspecies	2	3		TaxMP_MPAv1_NewWF_Hgut_1_A.csv
	TaxMP_MPAv1_NewWF_Hgut_1_A.csv		Eukaryota	Viridiplantae	Streptophyta	Liliopsida	Poales	Poaceae	Avena	Avena sativa	Unknown Subspecies	1	2		TaxMP_MPAv1_NewWF_Hgut_1_A.csv
	TaxMP_MPAv1_NewWF_Hgut_1_A.csv		Bacteria	Unknown Kingdom	Firmicutes	Bacilli	Bacillales	Staphylococcaceae	Unknown Genus	Unknown Species	Unknown Subspecies	1	1		TaxMP_MPAv1_NewWF_Hgut_1_A.csv
	TaxMP_MPAv1_NewWF_Hgut_1_A.csv		Bacteria	Unknown Kingdom	Firmicutes	Unknown Class	Unknown Order	Unknown Family	Unknown Genus	Unknown Species	Unknown Subspecies	1	1		TaxMP_MPAv1_NewWF_Hgut_1_A.csv
	TaxMP_MPAv1_NewWF_Hgut_1_A.csv		Eukaryota	Fungi	Ascomycota	Unknown Class	Unknown Order	Unknown Family	Unknown Genus	Unknown Species	Unknown Subspecies	3	2		TaxMP_MPAv1_NewWF_Hgut_1_A.csv
	TaxMP_MPAv1_NewWF_Hgut_1_A.csv		Eukaryota	Metazoa	Chordata	Mammalia	Unknown Order	Suidae	Sus	Sus scrofa	Unknown Subspecies	1	1		TaxMP_MPAv1_NewWF_Hgut_1_A.csv
	TaxMP_MPAv1_NewWF_Hgut_1_A.csv		Eukaryota	Metazoa	Chordata	Unknown Class	Unknown Order	Unknown Family	Unknown Genus	Unknown Species	Unknown Subspecies	11	16		TaxMP_MPAv1_NewWF_Hgut_1_A.csv
	TaxMP_MPAv1_NewWF_Hgut_1_A.csv		Eukaryota	Fungi	Ascomycota	Leotiomycetes	Unknown Order	Erysiphaceae	Blumeria	Blumeria graminis	Blumeria graminis f. sp. hordei	1	1		TaxMP_MPAv1_NewWF_Hgut_1_A.csv
	TaxMP_MPAv1_NewWF_Hgut_1_A.csv		Eukaryota	Metazoa	Chordata	Mammalia	Unknown Order	Unknown Family	Unknown Genus	Unknown Species	Unknown Subspecies	10	19		TaxMP_MPAv1_NewWF_Hgut_1_A.csv
	TaxMP_MPAv1_NewWF_Hgut_1_A.csv		Bacteria	Unknown Kingdom	Firmicutes	Clostridia	Natranaerobiales	Natranaerobiaceae	Natranaerobius	Natranaerobius thermophilus	Natranaerobius thermophilus JW/NM-WN-LF	1	1		TaxMP_MPAv1_NewWF_Hgut_1_A.csv
	TaxMP_MPAv1_NewWF_Hgut_1_A.csv		Bacteria	Unknown Kingdom	Bacteroidetes	Bacteroidia	Bacteroidales	Bacteroidaceae	Bacteroides	Bacteroides fragilis	Bacteroides fragilis YCH46	3	4		TaxMP_MPAv1_NewWF_Hgut_1_A.csv
	TaxMP_MPAv1_NewWF_Hgut_1_A.csv		Bacteria	Unknown Kingdom	Firmicutes	Bacilli	Bacillales	Unknown Family	Unknown Genus	Unknown Species	Unknown Subspecies	1	2		TaxMP_MPAv1_NewWF_Hgut_1_A.csv
	TaxMP_MPAv1_NewWF_Hgut_1_A.csv		Eukaryota	Metazoa	Chordata	Mammalia	Rodentia	Muridae	Mus	Mus musculus	Unknown Subspecies	2	3		TaxMP_MPAv1_NewWF_Hgut_1_A.csv
	TaxMP_MPAv1_NewWF_Hgut_1_A.csv		Bacteria	Unknown Kingdom	Proteobacteria	Gammaproteobacteria	Legionellales	Coxiellaceae	Coxiella	Coxiella burnetii	Coxiella burnetii CbuK_Q154	1	1		TaxMP_MPAv1_NewWF_Hgut_1_A.csv
	TaxMP_MPAv1_NewWF_Hgut_1_A.csv		Bacteria	Unknown Kingdom	Firmicutes	Clostridia	Clostridiales	Clostridiaceae	Clostridium	Clostridium botulinum	Clostridium botulinum F str. Langeland	1	1		TaxMP_MPAv1_NewWF_Hgut_1_A.csv
	TaxMP_MPAv1_NewWF_Hgut_1_A.csv		Bacteria	Unknown Kingdom	Bacteroidetes	Bacteroidia	Bacteroidales	Bacteroidaceae	Bacteroides	Bacteroides fragilis	Bacteroides fragilis NCTC 9343	2	2		TaxMP_MPAv1_NewWF_Hgut_1_A.csv
	TaxMP_MPAv1_NewWF_Hgut_1_A.csv		Eukaryota	Metazoa	Chordata	Aves	Galliformes	Phasianidae	Unknown Genus	Unknown Species	Unknown Subspecies	2	6		TaxMP_MPAv1_NewWF_Hgut_1_A.csv
	TaxMP_MPAv1_NewWF_Hgut_1_A.csv		Eukaryota	Fungi	Ascomycota	Saccharomycetes	Saccharomycetales	Saccharomycetaceae	Kluyveromyces	Unknown Species	Unknown Subspecies	2	2		TaxMP_MPAv1_NewWF_Hgut_1_A.csv
	TaxMP_MPAv1_NewWF_Hgut_1_A.csv		Bacteria	Unknown Kingdom	Proteobacteria	Gammaproteobacteria	Pseudomonadales	Pseudomonadaceae	Pseudomonas	Pseudomonas syringae group genomosp. 3	Pseudomonas syringae pv. tomato str. DC3000	1	1		TaxMP_MPAv1_NewWF_Hgut_1_A.csv
	TaxMP_MPAv1_NewWF_Hgut_1_A.csv		Bacteria	Unknown Kingdom	Deinococcus-Thermus	Deinococci	Thermales	Thermaceae	Thermus	Thermus thermophilus	Thermus thermophilus HB8	1	3		TaxMP_MPAv1_NewWF_Hgut_1_A.csv
	TaxMP_MPAv1_NewWF_Hgut_1_A.csv		Bacteria	Unknown Kingdom	Firmicutes	Clostridia	Unknown Order	Unknown Family	Unknown Genus	Unknown Species	Unknown Subspecies	2	1		TaxMP_MPAv1_NewWF_Hgut_1_A.csv
	TaxMP_MPAv1_NewWF_Hgut_1_A.csv		Eukaryota	Fungi	Ascomycota	Saccharomycetes	Saccharomycetales	Saccharomycetaceae	Saccharomyces	Saccharomyces cerevisiae	Saccharomyces cerevisiae S288c	4	4		TaxMP_MPAv1_NewWF_Hgut_1_A.csv
	TaxMP_MPAv1_NewWF_Hgut_1_A.csv		Eukaryota	Metazoa	Unknown Phylum	Unknown Class	Unknown Order	Unknown Family	Unknown Genus	Unknown Species	Unknown Subspecies	11	21		TaxMP_MPAv1_NewWF_Hgut_1_A.csv
	TaxMP_MPAv1_NewWF_Hgut_1_A.csv		Eukaryota	Metazoa	Chordata	Mammalia	Unknown Order	Bovidae	Bos	Bos taurus	Unknown Subspecies	2	2		TaxMP_MPAv1_NewWF_Hgut_1_A.csv
	TaxMP_MPAv1_NewWF_Hgut_1_A.csv		Eukaryota	Viridiplantae	Streptophyta	Unknown Class	Solanales	Solanaceae	Nicotiana	Nicotiana plumbaginifolia	Unknown Subspecies	1	2		TaxMP_MPAv1_NewWF_Hgut_1_A.csv
	TaxMP_MPAv1_NewWF_Hgut_1_B.csv		Bacteria	Unknown Kingdom	Bacteroidetes	Bacteroidia	Bacteroidales	Bacteroidaceae	Bacteroides	Bacteroides vulgatus	Bacteroides vulgatus ATCC 8482	1	1		TaxMP_MPAv1_NewWF_Hgut_1_B.csv
	TaxMP_MPAv1_NewWF_Hgut_1_B.csv		Unknown Superkingdom	Unknown Kingdom	Unknown Phylum	Unknown Class	Unknown Order	Unknown Family	Unknown Genus	Unknown Species	Unknown Subspecies	1395	2243		TaxMP_MPAv1_NewWF_Hgut_1_B.csv
	TaxMP_MPAv1_NewWF_Hgut_1_B.csv		Bacteria	Unknown Kingdom	Bacteroidetes	Bacteroidia	Bacteroidales	Porphyromonadaceae	Parabacteroides	Parabacteroides distasonis	Parabacteroides distasonis ATCC 8503	1	1		TaxMP_MPAv1_NewWF_Hgut_1_B.csv
	TaxMP_MPAv1_NewWF_Hgut_1_B.csv		Bacteria	Unknown Kingdom	Unknown Phylum	Unknown Class	Unknown Order	Unknown Family	Unknown Genus	Unknown Species	Unknown Subspecies	1	2		TaxMP_MPAv1_NewWF_Hgut_1_B.csv
	TaxMP_MPAv1_NewWF_Hgut_1_B.csv		Eukaryota	Metazoa	Chordata	Mammalia	Rodentia	Muridae	Rattus	Rattus norvegicus	Unknown Subspecies	1	1		TaxMP_MPAv1_NewWF_Hgut_1_B.csv
	TaxMP_MPAv1_NewWF_Hgut_1_B.csv		Eukaryota	Metazoa	Chordata	Mammalia	Primates	Hominidae	Unknown Genus	Unknown Species	Unknown Subspecies	1	1		TaxMP_MPAv1_NewWF_Hgut_1_B.csv
	TaxMP_MPAv1_NewWF_Hgut_1_B.csv		Eukaryota	Metazoa	Chordata	Mammalia	Primates	Hominidae	Homo	Homo sapiens	Unknown Subspecies	11	14		TaxMP_MPAv1_NewWF_Hgut_1_B.csv
	TaxMP_MPAv1_NewWF_Hgut_1_B.csv		Eukaryota	Metazoa	Chordata	Aves	Galliformes	Phasianidae	Gallus	Gallus gallus	Unknown Subspecies	6	9		TaxMP_MPAv1_NewWF_Hgut_1_B.csv
	TaxMP_MPAv1_NewWF_Hgut_1_B.csv		Eukaryota	Unknown Kingdom	Unknown Phylum	Unknown Class	Unknown Order	Unknown Family	Unknown Genus	Unknown Species	Unknown Subspecies	6	8		TaxMP_MPAv1_NewWF_Hgut_1_B.csv
	TaxMP_MPAv1_NewWF_Hgut_1_B.csv		Bacteria	Unknown Kingdom	Bacteroidetes	Bacteroidia	Bacteroidales	Bacteroidaceae	Bacteroides	Bacteroides thetaiotaomicron	Bacteroides thetaiotaomicron VPI-5482	1	2		TaxMP_MPAv1_NewWF_Hgut_1_B.csv
	TaxMP_MPAv1_NewWF_Hgut_1_B.csv		Bacteria	Unknown Kingdom	Bacteroidetes	Bacteroidia	Bacteroidales	Porphyromonadaceae	Porphyromonas	Porphyromonas gingivalis	Porphyromonas gingivalis ATCC 33277	1	2		TaxMP_MPAv1_NewWF_Hgut_1_B.csv
	TaxMP_MPAv1_NewWF_Hgut_1_B.csv		Eukaryota	Viridiplantae	Streptophyta	Unknown Class	Solanales	Solanaceae	Solanum	Solanum tuberosum	Unknown Subspecies	4	5		TaxMP_MPAv1_NewWF_Hgut_1_B.csv
	TaxMP_MPAv1_NewWF_Hgut_1_B.csv		Eukaryota	Viridiplantae	Streptophyta	Liliopsida	Poales	Poaceae	Avena	Avena sativa	Unknown Subspecies	1	2		TaxMP_MPAv1_NewWF_Hgut_1_B.csv
	TaxMP_MPAv1_NewWF_Hgut_1_B.csv		Bacteria	Unknown Kingdom	Firmicutes	Unknown Class	Unknown Order	Unknown Family	Unknown Genus	Unknown Species	Unknown Subspecies	2	1		TaxMP_MPAv1_NewWF_Hgut_1_B.csv
	TaxMP_MPAv1_NewWF_Hgut_1_B.csv		Bacteria	Unknown Kingdom	Acidobacteria	Solibacteres	Solibacterales	Solibacteraceae	Candidatus Solibacter	Candidatus Solibacter usitatus	Candidatus Solibacter usitatus Ellin6076	1	2		TaxMP_MPAv1_NewWF_Hgut_1_B.csv
	TaxMP_MPAv1_NewWF_Hgut_1_B.csv		Eukaryota	Fungi	Ascomycota	Unknown Class	Unknown Order	Unknown Family	Unknown Genus	Unknown Species	Unknown Subspecies	4	3		TaxMP_MPAv1_NewWF_Hgut_1_B.csv
	TaxMP_MPAv1_NewWF_Hgut_1_B.csv		Eukaryota	Fungi	Ascomycota	Saccharomycetes	Saccharomycetales	Saccharomycetaceae	Zygosaccharomyces	Zygosaccharomyces bailii	Unknown Subspecies	1	1		TaxMP_MPAv1_NewWF_Hgut_1_B.csv
	TaxMP_MPAv1_NewWF_Hgut_1_B.csv		Eukaryota	Metazoa	Chordata	Actinopterygii	Unknown Order	Unknown Family	Unknown Genus	Unknown Species	Unknown Subspecies	1	1		TaxMP_MPAv1_NewWF_Hgut_1_B.csv
	TaxMP_MPAv1_NewWF_Hgut_1_B.csv		Eukaryota	Fungi	Ascomycota	Saccharomycetes	Saccharomycetales	Saccharomycetaceae	Unknown Genus	Unknown Species	Unknown Subspecies	3	5		TaxMP_MPAv1_NewWF_Hgut_1_B.csv
	TaxMP_MPAv1_NewWF_Hgut_1_B.csv		Eukaryota	Metazoa	Chordata	Unknown Class	Unknown Order	Unknown Family	Unknown Genus	Unknown Species	Unknown Subspecies	2	4		TaxMP_MPAv1_NewWF_Hgut_1_B.csv
	TaxMP_MPAv1_NewWF_Hgut_1_B.csv		Eukaryota	Metazoa	Chordata	Aves	Struthioniformes	Struthionidae	Struthio	Struthio camelus	Unknown Subspecies	1	1		TaxMP_MPAv1_NewWF_Hgut_1_B.csv
	TaxMP_MPAv1_NewWF_Hgut_1_B.csv		Eukaryota	Metazoa	Chordata	Mammalia	Unknown Order	Unknown Family	Unknown Genus	Unknown Species	Unknown Subspecies	17	30		TaxMP_MPAv1_NewWF_Hgut_1_B.csv
	TaxMP_MPAv1_NewWF_Hgut_1_B.csv		Eukaryota	Fungi	Ascomycota	Saccharomycetes	Saccharomycetales	Saccharomycetaceae	Kluyveromyces	Kluyveromyces lactis	Kluyveromyces lactis NRRL Y-1140	2	3		TaxMP_MPAv1_NewWF_Hgut_1_B.csv
	TaxMP_MPAv1_NewWF_Hgut_1_B.csv		Eukaryota	Metazoa	Chordata	Mammalia	Rodentia	Muridae	Mus	Mus musculus	Unknown Subspecies	2	3		TaxMP_MPAv1_NewWF_Hgut_1_B.csv
	TaxMP_MPAv1_NewWF_Hgut_1_B.csv		Bacteria	Unknown Kingdom	Bacteroidetes	Bacteroidia	Bacteroidales	Bacteroidaceae	Bacteroides	Bacteroides fragilis	Bacteroides fragilis NCTC 9343	1	1		TaxMP_MPAv1_NewWF_Hgut_1_B.csv
	TaxMP_MPAv1_NewWF_Hgut_1_B.csv		Eukaryota	Metazoa	Chordata	Aves	Galliformes	Phasianidae	Unknown Genus	Unknown Species	Unknown Subspecies	1	3		TaxMP_MPAv1_NewWF_Hgut_1_B.csv
	TaxMP_MPAv1_NewWF_Hgut_1_B.csv		Bacteria	Unknown Kingdom	Proteobacteria	Gammaproteobacteria	Acidithiobacillales	Acidithiobacillaceae	Acidithiobacillus	Acidithiobacillus ferrooxidans	Acidithiobacillus ferrooxidans ATCC 53993	1	1		TaxMP_MPAv1_NewWF_Hgut_1_B.csv
	TaxMP_MPAv1_NewWF_Hgut_1_B.csv		Eukaryota	Fungi	Ascomycota	Saccharomycetes	Saccharomycetales	Saccharomycetaceae	Kluyveromyces	Kluyveromyces marxianus	Unknown Subspecies	1	2		TaxMP_MPAv1_NewWF_Hgut_1_B.csv
	TaxMP_MPAv1_NewWF_Hgut_1_B.csv		Bacteria	Unknown Kingdom	Deinococcus-Thermus	Deinococci	Thermales	Thermaceae	Thermus	Thermus thermophilus	Thermus thermophilus HB8	1	2		TaxMP_MPAv1_NewWF_Hgut_1_B.csv
	TaxMP_MPAv1_NewWF_Hgut_1_B.csv		Bacteria	Unknown Kingdom	Bacteroidetes	Unknown Class	Unknown Order	Unknown Family	Candidatus Amoebophilus	Candidatus Amoebophilus asiaticus	Candidatus Amoebophilus asiaticus 5a2	1	1		TaxMP_MPAv1_NewWF_Hgut_1_B.csv
	TaxMP_MPAv1_NewWF_Hgut_1_B.csv		Bacteria	Unknown Kingdom	Cyanobacteria	Unknown Class	Chroococcales	Unknown Family	Synechococcus	Synechococcus sp. PCC 7002	Unknown Subspecies	1	1		TaxMP_MPAv1_NewWF_Hgut_1_B.csv
	TaxMP_MPAv1_NewWF_Hgut_1_B.csv		Eukaryota	Fungi	Ascomycota	Saccharomycetes	Saccharomycetales	Saccharomycetaceae	Saccharomyces	Saccharomyces cerevisiae	Saccharomyces cerevisiae S288c	7	7		TaxMP_MPAv1_NewWF_Hgut_1_B.csv
	TaxMP_MPAv1_NewWF_Hgut_1_B.csv		Bacteria	Unknown Kingdom	Firmicutes	Clostridia	Clostridiales	Clostridiaceae	Clostridium	Clostridium phytofermentans	Clostridium phytofermentans ISDg	1	1		TaxMP_MPAv1_NewWF_Hgut_1_B.csv
	TaxMP_MPAv1_NewWF_Hgut_1_B.csv		Eukaryota	Metazoa	Unknown Phylum	Unknown Class	Unknown Order	Unknown Family	Unknown Genus	Unknown Species	Unknown Subspecies	4	4		TaxMP_MPAv1_NewWF_Hgut_1_B.csv
	TaxMP_MPAv1_NewWF_Hgut_1_B.csv		Bacteria	Unknown Kingdom	Bacteroidetes	Bacteroidia	Bacteroidales	Porphyromonadaceae	Porphyromonas	Porphyromonas gingivalis	Porphyromonas gingivalis W83	1	2		TaxMP_MPAv1_NewWF_Hgut_1_B.csv
	TaxMP_MPAv1_NewWF_Hgut_1_B.csv		Eukaryota	Metazoa	Arthropoda	Insecta	Diptera	Drosophilidae	Drosophila	Drosophila hydei	Unknown Subspecies	1	3		TaxMP_MPAv1_NewWF_Hgut_1_B.csv
	TaxMP_MPAv1_NewWF_Hgut_1_B.csv		Eukaryota	Metazoa	Chordata	Mammalia	Primates	Cercopithecidae	Chlorocebus	Chlorocebus aethiops	Unknown Subspecies	1	1		TaxMP_MPAv1_NewWF_Hgut_1_B.csv
	TaxMP_MPAv1_NewWF_Hgut_1_C.csv		Bacteria	Unknown Kingdom	Bacteroidetes	Bacteroidia	Bacteroidales	Bacteroidaceae	Bacteroides	Bacteroides vulgatus	Bacteroides vulgatus ATCC 8482	2	3		TaxMP_MPAv1_NewWF_Hgut_1_C.csv
	TaxMP_MPAv1_NewWF_Hgut_1_C.csv		Unknown Superkingdom	Unknown Kingdom	Unknown Phylum	Unknown Class	Unknown Order	Unknown Family	Unknown Genus	Unknown Species	Unknown Subspecies	1137	1757		TaxMP_MPAv1_NewWF_Hgut_1_C.csv
	TaxMP_MPAv1_NewWF_Hgut_1_C.csv		Bacteria	Unknown Kingdom	Unknown Phylum	Unknown Class	Unknown Order	Unknown Family	Unknown Genus	Unknown Species	Unknown Subspecies	4	4		TaxMP_MPAv1_NewWF_Hgut_1_C.csv
	TaxMP_MPAv1_NewWF_Hgut_1_C.csv		Eukaryota	Metazoa	Chordata	Mammalia	Rodentia	Muridae	Rattus	Rattus norvegicus	Unknown Subspecies	1	1		TaxMP_MPAv1_NewWF_Hgut_1_C.csv
	TaxMP_MPAv1_NewWF_Hgut_1_C.csv		Eukaryota	Metazoa	Chordata	Mammalia	Primates	Hominidae	Homo	Homo sapiens	Unknown Subspecies	11	19		TaxMP_MPAv1_NewWF_Hgut_1_C.csv
	TaxMP_MPAv1_NewWF_Hgut_1_C.csv		Eukaryota	Metazoa	Chordata	Aves	Galliformes	Phasianidae	Gallus	Gallus gallus	Unknown Subspecies	1	2		TaxMP_MPAv1_NewWF_Hgut_1_C.csv
	TaxMP_MPAv1_NewWF_Hgut_1_C.csv		Eukaryota	Unknown Kingdom	Unknown Phylum	Unknown Class	Unknown Order	Unknown Family	Unknown Genus	Unknown Species	Unknown Subspecies	1	1		TaxMP_MPAv1_NewWF_Hgut_1_C.csv
	TaxMP_MPAv1_NewWF_Hgut_1_C.csv		Eukaryota	Viridiplantae	Streptophyta	Unknown Class	Asterales	Asteraceae	Helianthus	Helianthus annuus	Unknown Subspecies	8	22		TaxMP_MPAv1_NewWF_Hgut_1_C.csv
	TaxMP_MPAv1_NewWF_Hgut_1_C.csv		Eukaryota	Viridiplantae	Streptophyta	Liliopsida	Poales	Poaceae	Oryza	Oryza sativa	Oryza sativa Indica Group	1	1		TaxMP_MPAv1_NewWF_Hgut_1_C.csv
	TaxMP_MPAv1_NewWF_Hgut_1_C.csv		Eukaryota	Viridiplantae	Streptophyta	Unknown Class	Cucurbitales	Cucurbitaceae	Cucurbita	Cucurbita maxima	Unknown Subspecies	10	37		TaxMP_MPAv1_NewWF_Hgut_1_C.csv
	TaxMP_MPAv1_NewWF_Hgut_1_C.csv		Bacteria	Unknown Kingdom	Firmicutes	Bacilli	Bacillales	Bacillaceae	Bacillus	Bacillus thuringiensis	Bacillus thuringiensis str. Al Hakam	1	1		TaxMP_MPAv1_NewWF_Hgut_1_C.csv
	TaxMP_MPAv1_NewWF_Hgut_1_C.csv		Eukaryota	Viridiplantae	Streptophyta	Liliopsida	Poales	Poaceae	Triticum	Triticum aestivum	Unknown Subspecies	1	1		TaxMP_MPAv1_NewWF_Hgut_1_C.csv
	TaxMP_MPAv1_NewWF_Hgut_1_C.csv		Eukaryota	Viridiplantae	Streptophyta	Unknown Class	Lamiales	Pedaliaceae	Sesamum	Sesamum indicum	Unknown Subspecies	1	2		TaxMP_MPAv1_NewWF_Hgut_1_C.csv
	TaxMP_MPAv1_NewWF_Hgut_1_C.csv		Viruses	Unknown Kingdom	Unknown Phylum	Unknown Class	Unknown Order	Adenoviridae	Mastadenovirus	Human adenovirus B	Human adenovirus 7	1	1		TaxMP_MPAv1_NewWF_Hgut_1_C.csv
	TaxMP_MPAv1_NewWF_Hgut_1_C.csv		Bacteria	Unknown Kingdom	Firmicutes	Unknown Class	Unknown Order	Unknown Family	Unknown Genus	Unknown Species	Unknown Subspecies	1	1		TaxMP_MPAv1_NewWF_Hgut_1_C.csv
	TaxMP_MPAv1_NewWF_Hgut_1_C.csv		Eukaryota	Metazoa	Chordata	Mammalia	Unknown Order	Suidae	Sus	Sus scrofa	Unknown Subspecies	1	2		TaxMP_MPAv1_NewWF_Hgut_1_C.csv
	TaxMP_MPAv1_NewWF_Hgut_1_C.csv		Eukaryota	Metazoa	Chordata	Mammalia	Unknown Order	Unknown Family	Unknown Genus	Unknown Species	Unknown Subspecies	10	18		TaxMP_MPAv1_NewWF_Hgut_1_C.csv
	TaxMP_MPAv1_NewWF_Hgut_1_C.csv		Bacteria	Unknown Kingdom	Firmicutes	Bacilli	Bacillales	Unknown Family	Unknown Genus	Unknown Species	Unknown Subspecies	1	3		TaxMP_MPAv1_NewWF_Hgut_1_C.csv
	TaxMP_MPAv1_NewWF_Hgut_1_C.csv		Eukaryota	Metazoa	Chordata	Mammalia	Rodentia	Muridae	Mus	Mus musculus	Unknown Subspecies	1	4		TaxMP_MPAv1_NewWF_Hgut_1_C.csv
	TaxMP_MPAv1_NewWF_Hgut_1_C.csv		Eukaryota	Viridiplantae	Streptophyta	Unknown Class	Fabales	Fabaceae	Phaseolus	Phaseolus vulgaris	Unknown Subspecies	1	1		TaxMP_MPAv1_NewWF_Hgut_1_C.csv
	TaxMP_MPAv1_NewWF_Hgut_1_C.csv		Eukaryota	Metazoa	Chordata	Aves	Galliformes	Phasianidae	Unknown Genus	Unknown Species	Unknown Subspecies	1	2		TaxMP_MPAv1_NewWF_Hgut_1_C.csv
	TaxMP_MPAv1_NewWF_Hgut_1_C.csv		Bacteria	Unknown Kingdom	Firmicutes	Bacilli	Bacillales	Bacillaceae	Bacillus	Bacillus cereus	Bacillus cereus E33L	1	1		TaxMP_MPAv1_NewWF_Hgut_1_C.csv
	TaxMP_MPAv1_NewWF_Hgut_1_C.csv		Eukaryota	Metazoa	Chordata	Mammalia	Unknown Order	Bovidae	Bison	Bison bison	Unknown Subspecies	1	1		TaxMP_MPAv1_NewWF_Hgut_1_C.csv
	TaxMP_MPAv1_NewWF_Hgut_1_C.csv		Bacteria	Unknown Kingdom	Proteobacteria	Betaproteobacteria	Burkholderiales	Unknown Family	Methylibium	Methylibium petroleiphilum	Methylibium petroleiphilum PM1	1	1		TaxMP_MPAv1_NewWF_Hgut_1_C.csv
	TaxMP_MPAv1_NewWF_Hgut_1_C.csv		Bacteria	Unknown Kingdom	Firmicutes	Bacilli	Bacillales	Bacillaceae	Bacillus	Bacillus anthracis	Unknown Subspecies	1	1		TaxMP_MPAv1_NewWF_Hgut_1_C.csv
	TaxMP_MPAv1_NewWF_Hgut_1_C.csv		Eukaryota	Metazoa	Chordata	Ascidiacea	Stolidobranchia	Pyuridae	Halocynthia	Halocynthia roretzi	Unknown Subspecies	1	1		TaxMP_MPAv1_NewWF_Hgut_1_C.csv
	TaxMP_MPAv1_NewWF_Hgut_1_C.csv		Eukaryota	Viridiplantae	Streptophyta	Unknown Class	Rosales	Rosaceae	Prunus	Prunus avium	Unknown Subspecies	1	1		TaxMP_MPAv1_NewWF_Hgut_1_C.csv
	TaxMP_MPAv1_NewWF_Hgut_1_C.csv		Bacteria	Unknown Kingdom	Actinobacteria	Actinobacteria	Actinomycetales	Unknown Family	Unknown Genus	Unknown Species	Unknown Subspecies	1	2		TaxMP_MPAv1_NewWF_Hgut_1_C.csv
	TaxMP_MPAv1_NewWF_Hgut_1_C.csv		Eukaryota	Metazoa	Unknown Phylum	Unknown Class	Unknown Order	Unknown Family	Unknown Genus	Unknown Species	Unknown Subspecies	3	4		TaxMP_MPAv1_NewWF_Hgut_1_C.csv
	TaxMP_MPAv1_NewWF_Hgut_1_C.csv		Eukaryota	Viridiplantae	Streptophyta	Unknown Class	Malvales	Malvaceae	Theobroma	Theobroma cacao	Unknown Subspecies	2	5		TaxMP_MPAv1_NewWF_Hgut_1_C.csv
	TaxMP_MPAv1_NewWF_Hgut_1_C.csv		Bacteria	Unknown Kingdom	Proteobacteria	Epsilonproteobacteria	Campylobacterales	Campylobacteraceae	Arcobacter	Arcobacter butzleri	Arcobacter butzleri RM4018	1	1		TaxMP_MPAv1_NewWF_Hgut_1_C.csv
	TaxMP_MPAv1_NewWF_Hgut_1_C.csv		Bacteria	Unknown Kingdom	Tenericutes	Mollicutes	Mycoplasmatales	Mycoplasmataceae	Mycoplasma	Mycoplasma pneumoniae	Mycoplasma pneumoniae M129	1	2		TaxMP_MPAv1_NewWF_Hgut_1_C.csv
	TaxMP_MPAv1_NewWF_Hgut_2_A.csv		Bacteria	Unknown Kingdom	Firmicutes	Bacilli	Bacillales	Staphylococcaceae	Staphylococcus	Staphylococcus aureus	Unknown Subspecies	1	1		TaxMP_MPAv1_NewWF_Hgut_2_A.csv
	TaxMP_MPAv1_NewWF_Hgut_2_A.csv		Unknown Superkingdom	Unknown Kingdom	Unknown Phylum	Unknown Class	Unknown Order	Unknown Family	Unknown Genus	Unknown Species	Unknown Subspecies	1976	3390		TaxMP_MPAv1_NewWF_Hgut_2_A.csv
	TaxMP_MPAv1_NewWF_Hgut_2_A.csv		Bacteria	Unknown Kingdom	Firmicutes	Clostridia	Clostridiales	Clostridiaceae	Clostridium	Clostridium cellulolyticum	Clostridium cellulolyticum H10	1	1		TaxMP_MPAv1_NewWF_Hgut_2_A.csv
	TaxMP_MPAv1_NewWF_Hgut_2_A.csv		Bacteria	Unknown Kingdom	Unknown Phylum	Unknown Class	Unknown Order	Unknown Family	Unknown Genus	Unknown Species	Unknown Subspecies	4	6		TaxMP_MPAv1_NewWF_Hgut_2_A.csv
	TaxMP_MPAv1_NewWF_Hgut_2_A.csv		Eukaryota	Metazoa	Chordata	Mammalia	Rodentia	Muridae	Rattus	Rattus norvegicus	Unknown Subspecies	1	1		TaxMP_MPAv1_NewWF_Hgut_2_A.csv
	TaxMP_MPAv1_NewWF_Hgut_2_A.csv		Eukaryota	Metazoa	Chordata	Mammalia	Primates	Hominidae	Homo	Homo sapiens	Unknown Subspecies	10	17		TaxMP_MPAv1_NewWF_Hgut_2_A.csv
	TaxMP_MPAv1_NewWF_Hgut_2_A.csv		Bacteria	Unknown Kingdom	Firmicutes	Clostridia	Clostridiales	Clostridiaceae	Alkaliphilus	Alkaliphilus metalliredigens	Alkaliphilus metalliredigens QYMF	1	2		TaxMP_MPAv1_NewWF_Hgut_2_A.csv
	TaxMP_MPAv1_NewWF_Hgut_2_A.csv		Eukaryota	Metazoa	Chordata	Aves	Galliformes	Phasianidae	Gallus	Gallus gallus	Unknown Subspecies	3	5		TaxMP_MPAv1_NewWF_Hgut_2_A.csv
	TaxMP_MPAv1_NewWF_Hgut_2_A.csv		Eukaryota	Unknown Kingdom	Unknown Phylum	Unknown Class	Unknown Order	Unknown Family	Unknown Genus	Unknown Species	Unknown Subspecies	3	2		TaxMP_MPAv1_NewWF_Hgut_2_A.csv
	TaxMP_MPAv1_NewWF_Hgut_2_A.csv		Eukaryota	Viridiplantae	Streptophyta	Unknown Class	Asterales	Asteraceae	Helianthus	Helianthus annuus	Unknown Subspecies	6	17		TaxMP_MPAv1_NewWF_Hgut_2_A.csv
	TaxMP_MPAv1_NewWF_Hgut_2_A.csv		Eukaryota	Fungi	Ascomycota	Schizosaccharomycetes	Schizosaccharomycetales	Schizosaccharomycetaceae	Schizosaccharomyces	Schizosaccharomyces pombe	Schizosaccharomyces pombe 972h-	1	1		TaxMP_MPAv1_NewWF_Hgut_2_A.csv
	TaxMP_MPAv1_NewWF_Hgut_2_A.csv		Bacteria	Unknown Kingdom	Bacteroidetes	Bacteroidia	Bacteroidales	Prevotellaceae	Prevotella	Prevotella loescheii	Unknown Subspecies	1	2		TaxMP_MPAv1_NewWF_Hgut_2_A.csv
	TaxMP_MPAv1_NewWF_Hgut_2_A.csv		Bacteria	Unknown Kingdom	Firmicutes	Bacilli	Bacillales	Bacillaceae	Bacillus	Bacillus cereus	Bacillus cereus Q1	1	1		TaxMP_MPAv1_NewWF_Hgut_2_A.csv
	TaxMP_MPAv1_NewWF_Hgut_2_A.csv		Bacteria	Unknown Kingdom	Firmicutes	Clostridia	Clostridiales	Clostridiaceae	Clostridium	Unknown Species	Unknown Subspecies	2	2		TaxMP_MPAv1_NewWF_Hgut_2_A.csv
	TaxMP_MPAv1_NewWF_Hgut_2_A.csv		Eukaryota	Viridiplantae	Streptophyta	Unknown Class	Malpighiales	Euphorbiaceae	Ricinus	Ricinus communis	Unknown Subspecies	1	2		TaxMP_MPAv1_NewWF_Hgut_2_A.csv
	TaxMP_MPAv1_NewWF_Hgut_2_A.csv		Bacteria	Unknown Kingdom	Firmicutes	Unknown Class	Unknown Order	Unknown Family	Unknown Genus	Unknown Species	Unknown Subspecies	3	3		TaxMP_MPAv1_NewWF_Hgut_2_A.csv
	TaxMP_MPAv1_NewWF_Hgut_2_A.csv		Bacteria	Unknown Kingdom	Proteobacteria	Deltaproteobacteria	Desulfuromonadales	Geobacteraceae	Geobacter	Geobacter sulfurreducens	Geobacter sulfurreducens PCA	1	1		TaxMP_MPAv1_NewWF_Hgut_2_A.csv
	TaxMP_MPAv1_NewWF_Hgut_2_A.csv		Bacteria	Unknown Kingdom	Bacteroidetes	Cytophagia	Cytophagales	Cytophagaceae	Unknown Genus	Unknown Species	Unknown Subspecies	1	1		TaxMP_MPAv1_NewWF_Hgut_2_A.csv
	TaxMP_MPAv1_NewWF_Hgut_2_A.csv		Eukaryota	Fungi	Ascomycota	Saccharomycetes	Saccharomycetales	Saccharomycetaceae	Unknown Genus	Unknown Species	Unknown Subspecies	1	3		TaxMP_MPAv1_NewWF_Hgut_2_A.csv
	TaxMP_MPAv1_NewWF_Hgut_2_A.csv		Eukaryota	Metazoa	Chordata	Unknown Class	Unknown Order	Unknown Family	Unknown Genus	Unknown Species	Unknown Subspecies	2	6		TaxMP_MPAv1_NewWF_Hgut_2_A.csv
	TaxMP_MPAv1_NewWF_Hgut_2_A.csv		Eukaryota	Metazoa	Chordata	Mammalia	Unknown Order	Suidae	Sus	Sus scrofa	Unknown Subspecies	1	1		TaxMP_MPAv1_NewWF_Hgut_2_A.csv
	TaxMP_MPAv1_NewWF_Hgut_2_A.csv		Bacteria	Unknown Kingdom	Firmicutes	Bacilli	Bacillales	Bacillaceae	Bacillus	Bacillus cereus	Bacillus cereus 03BB102	1	1		TaxMP_MPAv1_NewWF_Hgut_2_A.csv
	TaxMP_MPAv1_NewWF_Hgut_2_A.csv		Eukaryota	Viridiplantae	Streptophyta	Liliopsida	Poales	Poaceae	Zea	Zea mays	Unknown Subspecies	1	1		TaxMP_MPAv1_NewWF_Hgut_2_A.csv
	TaxMP_MPAv1_NewWF_Hgut_2_A.csv		Eukaryota	Metazoa	Chordata	Mammalia	Unknown Order	Unknown Family	Unknown Genus	Unknown Species	Unknown Subspecies	13	27		TaxMP_MPAv1_NewWF_Hgut_2_A.csv
	TaxMP_MPAv1_NewWF_Hgut_2_A.csv		Bacteria	Unknown Kingdom	Firmicutes	Clostridia	Clostridiales	Clostridiaceae	Clostridium	Clostridium botulinum	Clostridium botulinum Ba4 str. 657	1	1		TaxMP_MPAv1_NewWF_Hgut_2_A.csv
	TaxMP_MPAv1_NewWF_Hgut_2_A.csv		Bacteria	Unknown Kingdom	Proteobacteria	Alphaproteobacteria	Rhizobiales	Unknown Family	Unknown Genus	Unknown Species	Unknown Subspecies	1	2		TaxMP_MPAv1_NewWF_Hgut_2_A.csv
	TaxMP_MPAv1_NewWF_Hgut_2_A.csv		Eukaryota	Viridiplantae	Streptophyta	Unknown Class	Unknown Order	Unknown Family	Unknown Genus	Unknown Species	Unknown Subspecies	13	45		TaxMP_MPAv1_NewWF_Hgut_2_A.csv
	TaxMP_MPAv1_NewWF_Hgut_2_A.csv		Eukaryota	Metazoa	Chordata	Mammalia	Rodentia	Muridae	Mus	Mus musculus	Unknown Subspecies	2	2		TaxMP_MPAv1_NewWF_Hgut_2_A.csv
	TaxMP_MPAv1_NewWF_Hgut_2_A.csv		Bacteria	Unknown Kingdom	Firmicutes	Clostridia	Clostridiales	Clostridiaceae	Clostridium	Clostridium novyi	Clostridium novyi NT	1	1		TaxMP_MPAv1_NewWF_Hgut_2_A.csv
	TaxMP_MPAv1_NewWF_Hgut_2_A.csv		Bacteria	Unknown Kingdom	Firmicutes	Bacilli	Lactobacillales	Lactobacillaceae	Lactobacillus	Unknown Species	Unknown Subspecies	2	1		TaxMP_MPAv1_NewWF_Hgut_2_A.csv
	TaxMP_MPAv1_NewWF_Hgut_2_A.csv		Bacteria	Unknown Kingdom	Proteobacteria	Deltaproteobacteria	Myxococcales	Myxococcaceae	Anaeromyxobacter	Anaeromyxobacter sp. Fw109-5	Unknown Subspecies	1	2		TaxMP_MPAv1_NewWF_Hgut_2_A.csv
	TaxMP_MPAv1_NewWF_Hgut_2_A.csv		Bacteria	Unknown Kingdom	Bacteroidetes	Flavobacteriia	Flavobacteriales	Flavobacteriaceae	Flavobacterium	Flavobacterium johnsoniae	Flavobacterium johnsoniae UW101	1	1		TaxMP_MPAv1_NewWF_Hgut_2_A.csv
	TaxMP_MPAv1_NewWF_Hgut_2_A.csv		Bacteria	Unknown Kingdom	Bacteroidetes	Bacteroidia	Bacteroidales	Bacteroidaceae	Bacteroides	Bacteroides fragilis	Bacteroides fragilis NCTC 9343	1	1		TaxMP_MPAv1_NewWF_Hgut_2_A.csv
	TaxMP_MPAv1_NewWF_Hgut_2_A.csv		Eukaryota	Metazoa	Chordata	Aves	Galliformes	Phasianidae	Unknown Genus	Unknown Species	Unknown Subspecies	1	2		TaxMP_MPAv1_NewWF_Hgut_2_A.csv
	TaxMP_MPAv1_NewWF_Hgut_2_A.csv		Eukaryota	Unknown Kingdom	Apicomplexa	Aconoidasida	Unknown Order	Theileriidae	Theileria	Theileria parva	Unknown Subspecies	1	1		TaxMP_MPAv1_NewWF_Hgut_2_A.csv
	TaxMP_MPAv1_NewWF_Hgut_2_A.csv		Eukaryota	Metazoa	Chordata	Mammalia	Rodentia	Cricetidae	Mesocricetus	Mesocricetus auratus	Unknown Subspecies	1	1		TaxMP_MPAv1_NewWF_Hgut_2_A.csv
	TaxMP_MPAv1_NewWF_Hgut_2_A.csv		Eukaryota	Viridiplantae	Streptophyta	Unknown Class	Rosales	Rosaceae	Prunus	Prunus avium	Unknown Subspecies	1	1		TaxMP_MPAv1_NewWF_Hgut_2_A.csv
	TaxMP_MPAv1_NewWF_Hgut_2_A.csv		Bacteria	Unknown Kingdom	Actinobacteria	Actinobacteria	Actinomycetales	Unknown Family	Unknown Genus	Unknown Species	Unknown Subspecies	1	2		TaxMP_MPAv1_NewWF_Hgut_2_A.csv
	TaxMP_MPAv1_NewWF_Hgut_2_A.csv		Eukaryota	Metazoa	Unknown Phylum	Unknown Class	Unknown Order	Unknown Family	Unknown Genus	Unknown Species	Unknown Subspecies	1	1		TaxMP_MPAv1_NewWF_Hgut_2_A.csv
	TaxMP_MPAv1_NewWF_Hgut_2_A.csv		Eukaryota	Viridiplantae	Streptophyta	Unknown Class	Malvales	Malvaceae	Theobroma	Theobroma cacao	Unknown Subspecies	3	7		TaxMP_MPAv1_NewWF_Hgut_2_A.csv
	TaxMP_MPAv1_NewWF_Hgut_2_A.csv		Eukaryota	Metazoa	Chordata	Mammalia	Unknown Order	Bovidae	Bos	Bos taurus	Unknown Subspecies	3	4		TaxMP_MPAv1_NewWF_Hgut_2_A.csv
	TaxMP_MPAv1_NewWF_Hgut_2_A.csv		Bacteria	Unknown Kingdom	Chlorobi	Chlorobia	Chlorobiales	Chlorobiaceae	Pelodictyon	Pelodictyon luteolum	Chlorobium luteolum DSM 273	1	1		TaxMP_MPAv1_NewWF_Hgut_2_A.csv
	TaxMP_MPAv1_NewWF_Hgut_2_A.csv		Bacteria	Unknown Kingdom	Tenericutes	Mollicutes	Mycoplasmatales	Mycoplasmataceae	Mycoplasma	Mycoplasma pneumoniae	Mycoplasma pneumoniae M129	1	4		TaxMP_MPAv1_NewWF_Hgut_2_A.csv
	TaxMP_MPAv1_NewWF_Hgut_2_B.csv		Bacteria	Unknown Kingdom	Bacteroidetes	Bacteroidia	Bacteroidales	Bacteroidaceae	Bacteroides	Bacteroides vulgatus	Bacteroides vulgatus ATCC 8482	1	1		TaxMP_MPAv1_NewWF_Hgut_2_B.csv
	TaxMP_MPAv1_NewWF_Hgut_2_B.csv		Unknown Superkingdom	Unknown Kingdom	Unknown Phylum	Unknown Class	Unknown Order	Unknown Family	Unknown Genus	Unknown Species	Unknown Subspecies	1373	2168		TaxMP_MPAv1_NewWF_Hgut_2_B.csv
	TaxMP_MPAv1_NewWF_Hgut_2_B.csv		Eukaryota	Metazoa	Chordata	Mammalia	Primates	Hominidae	Pongo	Pongo abelii	Unknown Subspecies	1	2		TaxMP_MPAv1_NewWF_Hgut_2_B.csv
	TaxMP_MPAv1_NewWF_Hgut_2_B.csv		Bacteria	Unknown Kingdom	Unknown Phylum	Unknown Class	Unknown Order	Unknown Family	Unknown Genus	Unknown Species	Unknown Subspecies	5	10		TaxMP_MPAv1_NewWF_Hgut_2_B.csv
	TaxMP_MPAv1_NewWF_Hgut_2_B.csv		Bacteria	Unknown Kingdom	Proteobacteria	Epsilonproteobacteria	Campylobacterales	Campylobacteraceae	Campylobacter	Unknown Species	Unknown Subspecies	1	3		TaxMP_MPAv1_NewWF_Hgut_2_B.csv
	TaxMP_MPAv1_NewWF_Hgut_2_B.csv		Eukaryota	Metazoa	Chordata	Mammalia	Primates	Cercopithecidae	Macaca	Macaca fascicularis	Unknown Subspecies	2	2		TaxMP_MPAv1_NewWF_Hgut_2_B.csv
	TaxMP_MPAv1_NewWF_Hgut_2_B.csv		Eukaryota	Metazoa	Chordata	Mammalia	Primates	Hominidae	Homo	Homo sapiens	Unknown Subspecies	13	20		TaxMP_MPAv1_NewWF_Hgut_2_B.csv
	TaxMP_MPAv1_NewWF_Hgut_2_B.csv		Eukaryota	Metazoa	Chordata	Aves	Galliformes	Phasianidae	Gallus	Gallus gallus	Unknown Subspecies	1	1		TaxMP_MPAv1_NewWF_Hgut_2_B.csv
	TaxMP_MPAv1_NewWF_Hgut_2_B.csv		Eukaryota	Unknown Kingdom	Unknown Phylum	Unknown Class	Unknown Order	Unknown Family	Unknown Genus	Unknown Species	Unknown Subspecies	3	3		TaxMP_MPAv1_NewWF_Hgut_2_B.csv
	TaxMP_MPAv1_NewWF_Hgut_2_B.csv		Eukaryota	Viridiplantae	Streptophyta	Unknown Class	Asterales	Asteraceae	Helianthus	Helianthus annuus	Unknown Subspecies	3	9		TaxMP_MPAv1_NewWF_Hgut_2_B.csv
	TaxMP_MPAv1_NewWF_Hgut_2_B.csv		Eukaryota	Viridiplantae	Streptophyta	Unknown Class	Cucurbitales	Cucurbitaceae	Cucurbita	Cucurbita maxima	Unknown Subspecies	12	46		TaxMP_MPAv1_NewWF_Hgut_2_B.csv
	TaxMP_MPAv1_NewWF_Hgut_2_B.csv		Eukaryota	Fungi	Ascomycota	Eurotiomycetes	Eurotiales	Trichocomaceae	Penicillium	Penicillium chrysogenum	Unknown Subspecies	1	2		TaxMP_MPAv1_NewWF_Hgut_2_B.csv
	TaxMP_MPAv1_NewWF_Hgut_2_B.csv		Eukaryota	Viridiplantae	Streptophyta	Unknown Class	Lamiales	Pedaliaceae	Sesamum	Sesamum indicum	Unknown Subspecies	2	4		TaxMP_MPAv1_NewWF_Hgut_2_B.csv
	TaxMP_MPAv1_NewWF_Hgut_2_B.csv		Bacteria	Unknown Kingdom	Cyanobacteria	Gloeobacteria	Gloeobacterales	Unknown Family	Gloeobacter	Gloeobacter violaceus	Gloeobacter violaceus PCC 7421	1	1		TaxMP_MPAv1_NewWF_Hgut_2_B.csv
	TaxMP_MPAv1_NewWF_Hgut_2_B.csv		Eukaryota	Metazoa	Chordata	Amphibia	Anura	Ranidae	Rana	Rana temporaria	Unknown Subspecies	1	1		TaxMP_MPAv1_NewWF_Hgut_2_B.csv
	TaxMP_MPAv1_NewWF_Hgut_2_B.csv		Bacteria	Unknown Kingdom	Proteobacteria	Alphaproteobacteria	Rhizobiales	Bartonellaceae	Bartonella	Bartonella quintana	Bartonella quintana str. Toulouse	1	1		TaxMP_MPAv1_NewWF_Hgut_2_B.csv
	TaxMP_MPAv1_NewWF_Hgut_2_B.csv		Eukaryota	Fungi	Ascomycota	Saccharomycetes	Saccharomycetales	Unknown Family	Unknown Genus	Unknown Species	Unknown Subspecies	2	1		TaxMP_MPAv1_NewWF_Hgut_2_B.csv
	TaxMP_MPAv1_NewWF_Hgut_2_B.csv		Bacteria	Unknown Kingdom	Proteobacteria	Betaproteobacteria	Burkholderiales	Burkholderiaceae	Polynucleobacter	Polynucleobacter necessarius subsp. asymbioticus QLW-P1DMWA-1	Polynucleobacter necessarius subsp. asymbioticus	1	1		TaxMP_MPAv1_NewWF_Hgut_2_B.csv
	TaxMP_MPAv1_NewWF_Hgut_2_B.csv		Eukaryota	Fungi	Ascomycota	Saccharomycetes	Saccharomycetales	Saccharomycetaceae	Unknown Genus	Unknown Species	Unknown Subspecies	1	3		TaxMP_MPAv1_NewWF_Hgut_2_B.csv
	TaxMP_MPAv1_NewWF_Hgut_2_B.csv		Eukaryota	Metazoa	Chordata	Unknown Class	Unknown Order	Unknown Family	Unknown Genus	Unknown Species	Unknown Subspecies	3	6		TaxMP_MPAv1_NewWF_Hgut_2_B.csv
	TaxMP_MPAv1_NewWF_Hgut_2_B.csv		Bacteria	Unknown Kingdom	Proteobacteria	Gammaproteobacteria	Enterobacteriales	Enterobacteriaceae	Unknown Genus	Unknown Species	Unknown Subspecies	1	2		TaxMP_MPAv1_NewWF_Hgut_2_B.csv
	TaxMP_MPAv1_NewWF_Hgut_2_B.csv		Eukaryota	Fungi	Ascomycota	Leotiomycetes	Unknown Order	Erysiphaceae	Blumeria	Blumeria graminis	Blumeria graminis f. sp. hordei	1	1		TaxMP_MPAv1_NewWF_Hgut_2_B.csv
	TaxMP_MPAv1_NewWF_Hgut_2_B.csv		Eukaryota	Metazoa	Chordata	Mammalia	Unknown Order	Unknown Family	Unknown Genus	Unknown Species	Unknown Subspecies	10	14		TaxMP_MPAv1_NewWF_Hgut_2_B.csv
	TaxMP_MPAv1_NewWF_Hgut_2_B.csv		Eukaryota	Metazoa	Chordata	Amphibia	Anura	Pipidae	Xenopus	Xenopus laevis	Unknown Subspecies	1	1		TaxMP_MPAv1_NewWF_Hgut_2_B.csv
	TaxMP_MPAv1_NewWF_Hgut_2_B.csv		Bacteria	Unknown Kingdom	Firmicutes	Clostridia	Clostridiales	Eubacteriaceae	Eubacterium	Eubacterium rectale	Eubacterium rectale ATCC 33656	1	1		TaxMP_MPAv1_NewWF_Hgut_2_B.csv
	TaxMP_MPAv1_NewWF_Hgut_2_B.csv		Eukaryota	Viridiplantae	Streptophyta	Unknown Class	Unknown Order	Unknown Family	Unknown Genus	Unknown Species	Unknown Subspecies	1	1		TaxMP_MPAv1_NewWF_Hgut_2_B.csv
	TaxMP_MPAv1_NewWF_Hgut_2_B.csv		Eukaryota	Metazoa	Chordata	Mammalia	Rodentia	Muridae	Mus	Mus musculus	Unknown Subspecies	3	3		TaxMP_MPAv1_NewWF_Hgut_2_B.csv
	TaxMP_MPAv1_NewWF_Hgut_2_B.csv		Bacteria	Unknown Kingdom	Bacteroidetes	Bacteroidia	Bacteroidales	Bacteroidaceae	Bacteroides	Bacteroides fragilis	Bacteroides fragilis NCTC 9343	1	1		TaxMP_MPAv1_NewWF_Hgut_2_B.csv
	TaxMP_MPAv1_NewWF_Hgut_2_B.csv		Bacteria	Unknown Kingdom	Actinobacteria	Actinobacteria	Actinomycetales	Nocardiopsaceae	Thermobifida	Thermobifida fusca	Thermobifida fusca YX	1	2		TaxMP_MPAv1_NewWF_Hgut_2_B.csv
	TaxMP_MPAv1_NewWF_Hgut_2_B.csv		Bacteria	Unknown Kingdom	Firmicutes	Clostridia	Clostridiales	Clostridiaceae	Clostridium	Clostridium botulinum	Clostridium botulinum A str. ATCC 19397	1	1		TaxMP_MPAv1_NewWF_Hgut_2_B.csv
	TaxMP_MPAv1_NewWF_Hgut_2_B.csv		Eukaryota	Metazoa	Chordata	Aves	Galliformes	Phasianidae	Unknown Genus	Unknown Species	Unknown Subspecies	1	2		TaxMP_MPAv1_NewWF_Hgut_2_B.csv
	TaxMP_MPAv1_NewWF_Hgut_2_B.csv		Eukaryota	Fungi	Ascomycota	Saccharomycetes	Saccharomycetales	Saccharomycetaceae	Kluyveromyces	Unknown Species	Unknown Subspecies	1	1		TaxMP_MPAv1_NewWF_Hgut_2_B.csv
	TaxMP_MPAv1_NewWF_Hgut_2_B.csv		Bacteria	Unknown Kingdom	Bacteroidetes	Bacteroidia	Bacteroidales	Bacteroidaceae	Bacteroides	Unknown Species	Unknown Subspecies	2	4		TaxMP_MPAv1_NewWF_Hgut_2_B.csv
	TaxMP_MPAv1_NewWF_Hgut_2_B.csv		Bacteria	Unknown Kingdom	Firmicutes	Clostridia	Clostridiales	Syntrophomonadaceae	Syntrophomonas	Syntrophomonas wolfei subsp. wolfei str. Goettingen	Syntrophomonas wolfei subsp. wolfei	1	1		TaxMP_MPAv1_NewWF_Hgut_2_B.csv
	TaxMP_MPAv1_NewWF_Hgut_2_B.csv		Bacteria	Unknown Kingdom	Firmicutes	Bacilli	Lactobacillales	Lactobacillaceae	Lactobacillus	Lactobacillus reuteri	Lactobacillus reuteri JCM 1112	1	1		TaxMP_MPAv1_NewWF_Hgut_2_B.csv
	TaxMP_MPAv1_NewWF_Hgut_2_B.csv		Eukaryota	Viridiplantae	Chlorophyta	Mamiellophyceae	Mamiellales	Unknown Family	Ostreococcus	Ostreococcus tauri	Unknown Subspecies	1	1		TaxMP_MPAv1_NewWF_Hgut_2_B.csv
	TaxMP_MPAv1_NewWF_Hgut_2_B.csv		Eukaryota	Viridiplantae	Streptophyta	Unknown Class	Rosales	Rosaceae	Prunus	Prunus avium	Unknown Subspecies	1	1		TaxMP_MPAv1_NewWF_Hgut_2_B.csv
	TaxMP_MPAv1_NewWF_Hgut_2_B.csv		Eukaryota	Viridiplantae	Streptophyta	Unknown Class	Malpighiales	Salicaceae	Populus	Populus euphratica	Unknown Subspecies	1	1		TaxMP_MPAv1_NewWF_Hgut_2_B.csv
	TaxMP_MPAv1_NewWF_Hgut_2_B.csv		Bacteria	Unknown Kingdom	Cyanobacteria	Unknown Class	Prochlorales	Prochlorococcaceae	Prochlorococcus	Prochlorococcus marinus	Prochlorococcus marinus str. MIT 9301	1	1		TaxMP_MPAv1_NewWF_Hgut_2_B.csv
	TaxMP_MPAv1_NewWF_Hgut_2_B.csv		Eukaryota	Viridiplantae	Streptophyta	Unknown Class	Malvales	Malvaceae	Theobroma	Theobroma cacao	Unknown Subspecies	2	2		TaxMP_MPAv1_NewWF_Hgut_2_B.csv
	TaxMP_MPAv1_NewWF_Hgut_2_B.csv		Eukaryota	Metazoa	Chordata	Mammalia	Unknown Order	Bovidae	Bos	Bos taurus	Unknown Subspecies	2	2		TaxMP_MPAv1_NewWF_Hgut_2_B.csv
	TaxMP_MPAv1_NewWF_Hgut_2_B.csv		Eukaryota	Metazoa	Chordata	Mammalia	Primates	Hominidae	Gorilla	Gorilla gorilla	Gorilla gorilla gorilla	1	2		TaxMP_MPAv1_NewWF_Hgut_2_B.csv
	TaxMP_MPAv1_NewWF_Hgut_2_C.csv		Bacteria	Unknown Kingdom	Bacteroidetes	Bacteroidia	Bacteroidales	Bacteroidaceae	Bacteroides	Bacteroides vulgatus	Bacteroides vulgatus ATCC 8482	5	6		TaxMP_MPAv1_NewWF_Hgut_2_C.csv
	TaxMP_MPAv1_NewWF_Hgut_2_C.csv		Unknown Superkingdom	Unknown Kingdom	Unknown Phylum	Unknown Class	Unknown Order	Unknown Family	Unknown Genus	Unknown Species	Unknown Subspecies	1524	2473		TaxMP_MPAv1_NewWF_Hgut_2_C.csv
	TaxMP_MPAv1_NewWF_Hgut_2_C.csv		Bacteria	Unknown Kingdom	Bacteroidetes	Bacteroidia	Bacteroidales	Porphyromonadaceae	Parabacteroides	Parabacteroides distasonis	Parabacteroides distasonis ATCC 8503	1	1		TaxMP_MPAv1_NewWF_Hgut_2_C.csv
	TaxMP_MPAv1_NewWF_Hgut_2_C.csv		Bacteria	Unknown Kingdom	Unknown Phylum	Unknown Class	Unknown Order	Unknown Family	Unknown Genus	Unknown Species	Unknown Subspecies	8	13		TaxMP_MPAv1_NewWF_Hgut_2_C.csv
	TaxMP_MPAv1_NewWF_Hgut_2_C.csv		Eukaryota	Metazoa	Chordata	Mammalia	Primates	Hominidae	Homo	Homo sapiens	Unknown Subspecies	8	10		TaxMP_MPAv1_NewWF_Hgut_2_C.csv
	TaxMP_MPAv1_NewWF_Hgut_2_C.csv		Eukaryota	Metazoa	Chordata	Aves	Galliformes	Phasianidae	Gallus	Gallus gallus	Unknown Subspecies	3	5		TaxMP_MPAv1_NewWF_Hgut_2_C.csv
	TaxMP_MPAv1_NewWF_Hgut_2_C.csv		Eukaryota	Unknown Kingdom	Unknown Phylum	Unknown Class	Unknown Order	Unknown Family	Unknown Genus	Unknown Species	Unknown Subspecies	7	9		TaxMP_MPAv1_NewWF_Hgut_2_C.csv
	TaxMP_MPAv1_NewWF_Hgut_2_C.csv		Bacteria	Unknown Kingdom	Bacteroidetes	Bacteroidia	Bacteroidales	Bacteroidaceae	Bacteroides	Bacteroides thetaiotaomicron	Bacteroides thetaiotaomicron VPI-5482	1	2		TaxMP_MPAv1_NewWF_Hgut_2_C.csv
	TaxMP_MPAv1_NewWF_Hgut_2_C.csv		Eukaryota	Fungi	Unknown Phylum	Unknown Class	Unknown Order	Unknown Family	Unknown Genus	Unknown Species	Unknown Subspecies	2	1		TaxMP_MPAv1_NewWF_Hgut_2_C.csv
	TaxMP_MPAv1_NewWF_Hgut_2_C.csv		Eukaryota	Metazoa	Chordata	Mammalia	Carnivora	Canidae	Canis	Canis lupus	Canis lupus familiaris	1	1		TaxMP_MPAv1_NewWF_Hgut_2_C.csv
	TaxMP_MPAv1_NewWF_Hgut_2_C.csv		Eukaryota	Viridiplantae	Streptophyta	Unknown Class	Solanales	Solanaceae	Solanum	Solanum tuberosum	Unknown Subspecies	2	4		TaxMP_MPAv1_NewWF_Hgut_2_C.csv
	TaxMP_MPAv1_NewWF_Hgut_2_C.csv		Bacteria	Unknown Kingdom	Firmicutes	Unknown Class	Unknown Order	Unknown Family	Unknown Genus	Unknown Species	Unknown Subspecies	1	2		TaxMP_MPAv1_NewWF_Hgut_2_C.csv
	TaxMP_MPAv1_NewWF_Hgut_2_C.csv		Bacteria	Unknown Kingdom	Proteobacteria	Gammaproteobacteria	Aeromonadales	Succinivibrionaceae	Anaerobiospirillum	Anaerobiospirillum succiniciproducens	Unknown Subspecies	1	2		TaxMP_MPAv1_NewWF_Hgut_2_C.csv
	TaxMP_MPAv1_NewWF_Hgut_2_C.csv		Bacteria	Unknown Kingdom	Firmicutes	Bacilli	Bacillales	Bacillaceae	Bacillus	Bacillus anthracis	Bacillus anthracis str. A0248	1	1		TaxMP_MPAv1_NewWF_Hgut_2_C.csv
	TaxMP_MPAv1_NewWF_Hgut_2_C.csv		Eukaryota	Fungi	Ascomycota	Saccharomycetes	Saccharomycetales	Saccharomycetaceae	Unknown Genus	Unknown Species	Unknown Subspecies	4	6		TaxMP_MPAv1_NewWF_Hgut_2_C.csv
	TaxMP_MPAv1_NewWF_Hgut_2_C.csv		Eukaryota	Metazoa	Chordata	Unknown Class	Unknown Order	Unknown Family	Unknown Genus	Unknown Species	Unknown Subspecies	10	16		TaxMP_MPAv1_NewWF_Hgut_2_C.csv
	TaxMP_MPAv1_NewWF_Hgut_2_C.csv		Eukaryota	Metazoa	Chordata	Aves	Struthioniformes	Struthionidae	Struthio	Struthio camelus	Unknown Subspecies	1	1		TaxMP_MPAv1_NewWF_Hgut_2_C.csv
	TaxMP_MPAv1_NewWF_Hgut_2_C.csv		Eukaryota	Metazoa	Chordata	Mammalia	Unknown Order	Unknown Family	Unknown Genus	Unknown Species	Unknown Subspecies	10	15		TaxMP_MPAv1_NewWF_Hgut_2_C.csv
	TaxMP_MPAv1_NewWF_Hgut_2_C.csv		Eukaryota	Metazoa	Chordata	Mammalia	Primates	Unknown Family	Unknown Genus	Unknown Species	Unknown Subspecies	2	6		TaxMP_MPAv1_NewWF_Hgut_2_C.csv
	TaxMP_MPAv1_NewWF_Hgut_2_C.csv		Eukaryota	Fungi	Ascomycota	Saccharomycetes	Saccharomycetales	Unknown Family	Candida	Candida albicans	Unknown Subspecies	1	1		TaxMP_MPAv1_NewWF_Hgut_2_C.csv
	TaxMP_MPAv1_NewWF_Hgut_2_C.csv		Bacteria	Unknown Kingdom	Firmicutes	Clostridia	Clostridiales	Eubacteriaceae	Eubacterium	Eubacterium rectale	Eubacterium rectale ATCC 33656	1	1		TaxMP_MPAv1_NewWF_Hgut_2_C.csv
	TaxMP_MPAv1_NewWF_Hgut_2_C.csv		Bacteria	Unknown Kingdom	Proteobacteria	Epsilonproteobacteria	Campylobacterales	Helicobacteraceae	Helicobacter	Helicobacter pylori	Helicobacter pylori G27	1	1		TaxMP_MPAv1_NewWF_Hgut_2_C.csv
	TaxMP_MPAv1_NewWF_Hgut_2_C.csv		Eukaryota	Metazoa	Chordata	Mammalia	Rodentia	Muridae	Mus	Mus musculus	Unknown Subspecies	2	4		TaxMP_MPAv1_NewWF_Hgut_2_C.csv
	TaxMP_MPAv1_NewWF_Hgut_2_C.csv		Eukaryota	Unknown Kingdom	Unknown Phylum	Heterolobosea	Schizopyrenida	Vahlkampfiidae	Naegleria	Naegleria pringsheimi	Unknown Subspecies	1	1		TaxMP_MPAv1_NewWF_Hgut_2_C.csv
	TaxMP_MPAv1_NewWF_Hgut_2_C.csv		Eukaryota	Fungi	Ascomycota	Saccharomycetes	Saccharomycetales	Saccharomycetaceae	Kluyveromyces	Kluyveromyces lactis	Kluyveromyces lactis NRRL Y-1140	2	2		TaxMP_MPAv1_NewWF_Hgut_2_C.csv
	TaxMP_MPAv1_NewWF_Hgut_2_C.csv		Eukaryota	Metazoa	Chordata	Aves	Galliformes	Phasianidae	Unknown Genus	Unknown Species	Unknown Subspecies	1	2		TaxMP_MPAv1_NewWF_Hgut_2_C.csv
	TaxMP_MPAv1_NewWF_Hgut_2_C.csv		Bacteria	Unknown Kingdom	Deinococcus-Thermus	Deinococci	Thermales	Thermaceae	Thermus	Thermus thermophilus	Thermus thermophilus HB8	1	1		TaxMP_MPAv1_NewWF_Hgut_2_C.csv
	TaxMP_MPAv1_NewWF_Hgut_2_C.csv		Eukaryota	Viridiplantae	Streptophyta	Liliopsida	Poales	Poaceae	Oryza	Oryza sativa	Unknown Subspecies	1	2		TaxMP_MPAv1_NewWF_Hgut_2_C.csv
	TaxMP_MPAv1_NewWF_Hgut_2_C.csv		Eukaryota	Fungi	Ascomycota	Saccharomycetes	Saccharomycetales	Saccharomycetaceae	Saccharomyces	Saccharomyces cerevisiae	Saccharomyces cerevisiae S288c	5	6		TaxMP_MPAv1_NewWF_Hgut_2_C.csv
	TaxMP_MPAv1_NewWF_Hgut_2_C.csv		Bacteria	Unknown Kingdom	Firmicutes	Clostridia	Clostridiales	Clostridiaceae	Clostridium	Clostridium phytofermentans	Clostridium phytofermentans ISDg	1	1		TaxMP_MPAv1_NewWF_Hgut_2_C.csv
	TaxMP_MPAv1_NewWF_Hgut_2_C.csv		Bacteria	Unknown Kingdom	Firmicutes	Bacilli	Bacillales	Bacillaceae	Oceanobacillus	Oceanobacillus iheyensis	Oceanobacillus iheyensis HTE831	1	1		TaxMP_MPAv1_NewWF_Hgut_2_C.csv
	TaxMP_MPAv1_NewWF_Hgut_2_C.csv		Eukaryota	Metazoa	Unknown Phylum	Unknown Class	Unknown Order	Unknown Family	Unknown Genus	Unknown Species	Unknown Subspecies	4	7		TaxMP_MPAv1_NewWF_Hgut_2_C.csv
	TaxMP_MPAv1_NewWF_Hgut_2_C.csv		Eukaryota	Metazoa	Chordata	Mammalia	Unknown Order	Bovidae	Bos	Bos taurus	Unknown Subspecies	1	1		TaxMP_MPAv1_NewWF_Hgut_2_C.csv
	TaxMP_MPAv1_NewWF_Hgut_3_A.csv		Bacteria	Unknown Kingdom	Bacteroidetes	Bacteroidia	Bacteroidales	Bacteroidaceae	Bacteroides	Bacteroides vulgatus	Bacteroides vulgatus ATCC 8482	3	4		TaxMP_MPAv1_NewWF_Hgut_3_A.csv
	TaxMP_MPAv1_NewWF_Hgut_3_A.csv		Unknown Superkingdom	Unknown Kingdom	Unknown Phylum	Unknown Class	Unknown Order	Unknown Family	Unknown Genus	Unknown Species	Unknown Subspecies	1787	3620		TaxMP_MPAv1_NewWF_Hgut_3_A.csv
	TaxMP_MPAv1_NewWF_Hgut_3_A.csv		Eukaryota	Metazoa	Chordata	Mammalia	Lagomorpha	Leporidae	Oryctolagus	Oryctolagus cuniculus	Unknown Subspecies	2	2		TaxMP_MPAv1_NewWF_Hgut_3_A.csv
	TaxMP_MPAv1_NewWF_Hgut_3_A.csv		Bacteria	Unknown Kingdom	Unknown Phylum	Unknown Class	Unknown Order	Unknown Family	Unknown Genus	Unknown Species	Unknown Subspecies	6	6		TaxMP_MPAv1_NewWF_Hgut_3_A.csv
	TaxMP_MPAv1_NewWF_Hgut_3_A.csv		Eukaryota	Metazoa	Chordata	Mammalia	Rodentia	Unknown Family	Unknown Genus	Unknown Species	Unknown Subspecies	1	2		TaxMP_MPAv1_NewWF_Hgut_3_A.csv
	TaxMP_MPAv1_NewWF_Hgut_3_A.csv		Eukaryota	Metazoa	Chordata	Mammalia	Primates	Hominidae	Homo	Homo sapiens	Unknown Subspecies	13	28		TaxMP_MPAv1_NewWF_Hgut_3_A.csv
	TaxMP_MPAv1_NewWF_Hgut_3_A.csv		Eukaryota	Viridiplantae	Streptophyta	Unknown Class	Asterales	Asteraceae	Helianthus	Helianthus annuus	Unknown Subspecies	1	1		TaxMP_MPAv1_NewWF_Hgut_3_A.csv
	TaxMP_MPAv1_NewWF_Hgut_3_A.csv		Bacteria	Unknown Kingdom	Bacteroidetes	Bacteroidia	Bacteroidales	Bacteroidaceae	Bacteroides	Bacteroides thetaiotaomicron	Bacteroides thetaiotaomicron VPI-5482	1	1		TaxMP_MPAv1_NewWF_Hgut_3_A.csv
	TaxMP_MPAv1_NewWF_Hgut_3_A.csv		Bacteria	Unknown Kingdom	Proteobacteria	Alphaproteobacteria	Rhizobiales	Bradyrhizobiaceae	Bradyrhizobium	Bradyrhizobium japonicum	Bradyrhizobium japonicum USDA 110	1	2		TaxMP_MPAv1_NewWF_Hgut_3_A.csv
	TaxMP_MPAv1_NewWF_Hgut_3_A.csv		Eukaryota	Metazoa	Chordata	Mammalia	Carnivora	Canidae	Canis	Canis lupus	Canis lupus familiaris	1	1		TaxMP_MPAv1_NewWF_Hgut_3_A.csv
	TaxMP_MPAv1_NewWF_Hgut_3_A.csv		Eukaryota	Unknown Kingdom	Unknown Phylum	Unknown Class	Dictyosteliida	Unknown Family	Dictyostelium	Dictyostelium discoideum	Unknown Subspecies	1	1		TaxMP_MPAv1_NewWF_Hgut_3_A.csv
	TaxMP_MPAv1_NewWF_Hgut_3_A.csv		Eukaryota	Viridiplantae	Streptophyta	Unknown Class	Solanales	Convolvulaceae	Ipomoea	Ipomoea batatas	Unknown Subspecies	1	3		TaxMP_MPAv1_NewWF_Hgut_3_A.csv
	TaxMP_MPAv1_NewWF_Hgut_3_A.csv		Eukaryota	Fungi	Ascomycota	Saccharomycetes	Saccharomycetales	Saccharomycetaceae	Unknown Genus	Unknown Species	Unknown Subspecies	1	1		TaxMP_MPAv1_NewWF_Hgut_3_A.csv
	TaxMP_MPAv1_NewWF_Hgut_3_A.csv		Eukaryota	Metazoa	Chordata	Unknown Class	Unknown Order	Unknown Family	Unknown Genus	Unknown Species	Unknown Subspecies	5	9		TaxMP_MPAv1_NewWF_Hgut_3_A.csv
	TaxMP_MPAv1_NewWF_Hgut_3_A.csv		Bacteria	Unknown Kingdom	Proteobacteria	Gammaproteobacteria	Enterobacteriales	Enterobacteriaceae	Unknown Genus	Unknown Species	Unknown Subspecies	1	1		TaxMP_MPAv1_NewWF_Hgut_3_A.csv
	TaxMP_MPAv1_NewWF_Hgut_3_A.csv		Bacteria	Unknown Kingdom	Firmicutes	Clostridia	Clostridiales	Eubacteriaceae	Eubacterium	Eubacterium rectale	Eubacterium rectale ATCC 33656	4	5		TaxMP_MPAv1_NewWF_Hgut_3_A.csv
	TaxMP_MPAv1_NewWF_Hgut_3_A.csv		Bacteria	Unknown Kingdom	Proteobacteria	Betaproteobacteria	Neisseriales	Neisseriaceae	Chromobacterium	Chromobacterium violaceum	Chromobacterium violaceum ATCC 12472	1	1		TaxMP_MPAv1_NewWF_Hgut_3_A.csv
	TaxMP_MPAv1_NewWF_Hgut_3_A.csv		Eukaryota	Metazoa	Chordata	Mammalia	Rodentia	Chinchillidae	Lagostomus	Lagostomus maximus	Unknown Subspecies	1	1		TaxMP_MPAv1_NewWF_Hgut_3_A.csv
	TaxMP_MPAv1_NewWF_Hgut_3_A.csv		Eukaryota	Fungi	Ascomycota	Saccharomycetes	Saccharomycetales	Saccharomycetaceae	Kluyveromyces	Kluyveromyces lactis	Kluyveromyces lactis NRRL Y-1140	2	1		TaxMP_MPAv1_NewWF_Hgut_3_A.csv
	TaxMP_MPAv1_NewWF_Hgut_3_A.csv		Eukaryota	Metazoa	Chordata	Mammalia	Rodentia	Sciuridae	Ictidomys	Ictidomys tridecemlineatus	Unknown Subspecies	1	1		TaxMP_MPAv1_NewWF_Hgut_3_A.csv
	TaxMP_MPAv1_NewWF_Hgut_3_A.csv		Bacteria	Unknown Kingdom	Bacteroidetes	Bacteroidia	Bacteroidales	Bacteroidaceae	Bacteroides	Bacteroides fragilis	Bacteroides fragilis NCTC 9343	1	1		TaxMP_MPAv1_NewWF_Hgut_3_A.csv
	TaxMP_MPAv1_NewWF_Hgut_3_A.csv		Eukaryota	Fungi	Ascomycota	Saccharomycetes	Saccharomycetales	Saccharomycetaceae	Kluyveromyces	Unknown Species	Unknown Subspecies	1	1		TaxMP_MPAv1_NewWF_Hgut_3_A.csv
	TaxMP_MPAv1_NewWF_Hgut_3_A.csv		Bacteria	Unknown Kingdom	Firmicutes	Bacilli	Unknown Order	Unknown Family	Unknown Genus	Unknown Species	Unknown Subspecies	1	2		TaxMP_MPAv1_NewWF_Hgut_3_A.csv
	TaxMP_MPAv1_NewWF_Hgut_3_A.csv		Bacteria	Unknown Kingdom	Firmicutes	Clostridia	Clostridiales	Peptostreptococcaceae	Unknown Genus	[Clostridium] difficile	Clostridium difficile 630	1	3		TaxMP_MPAv1_NewWF_Hgut_3_A.csv
	TaxMP_MPAv1_NewWF_Hgut_3_A.csv		Eukaryota	Metazoa	Unknown Phylum	Unknown Class	Unknown Order	Unknown Family	Unknown Genus	Unknown Species	Unknown Subspecies	5	7		TaxMP_MPAv1_NewWF_Hgut_3_A.csv
	TaxMP_MPAv1_NewWF_Hgut_3_A.csv		Eukaryota	Viridiplantae	Streptophyta	Unknown Class	Malvales	Malvaceae	Theobroma	Theobroma cacao	Unknown Subspecies	1	1		TaxMP_MPAv1_NewWF_Hgut_3_A.csv
	TaxMP_MPAv1_NewWF_Hgut_3_A.csv		Eukaryota	Metazoa	Chordata	Mammalia	Unknown Order	Bovidae	Bos	Bos taurus	Unknown Subspecies	1	1		TaxMP_MPAv1_NewWF_Hgut_3_A.csv
	TaxMP_MPAv1_NewWF_Hgut_3_A.csv		Bacteria	Unknown Kingdom	Proteobacteria	Alphaproteobacteria	Rhodobacterales	Rhodobacteraceae	Ruegeria	Ruegeria sp. TM1040	Unknown Subspecies	1	1		TaxMP_MPAv1_NewWF_Hgut_3_A.csv
	TaxMP_MPAv1_NewWF_Hgut_3_A.csv		Bacteria	Unknown Kingdom	Actinobacteria	Actinobacteria	Actinomycetales	Nocardioidaceae	Nocardioides	Nocardioides sp. JS614	Unknown Subspecies	1	1		TaxMP_MPAv1_NewWF_Hgut_3_A.csv
	TaxMP_MPAv1_NewWF_Hgut_3_A.csv		Bacteria	Unknown Kingdom	Firmicutes	Bacilli	Bacillales	Listeriaceae	Listeria	Listeria monocytogenes	Listeria monocytogenes serotype 4b str. F2365	1	1		TaxMP_MPAv1_NewWF_Hgut_3_A.csv
	TaxMP_MPAv1_NewWF_Hgut_3_A.csv		Eukaryota	Metazoa	Arthropoda	Merostomata	Xiphosura	Limulidae	Limulus	Limulus polyphemus	Unknown Subspecies	1	2		TaxMP_MPAv1_NewWF_Hgut_3_A.csv
	TaxMP_MPAv1_NewWF_Hgut_3_A.csv		Eukaryota	Metazoa	Chordata	Aves	Galliformes	Phasianidae	Gallus	Gallus gallus	Unknown Subspecies	7	9		TaxMP_MPAv1_NewWF_Hgut_3_A.csv
	TaxMP_MPAv1_NewWF_Hgut_3_A.csv		Eukaryota	Unknown Kingdom	Unknown Phylum	Unknown Class	Unknown Order	Unknown Family	Unknown Genus	Unknown Species	Unknown Subspecies	6	8		TaxMP_MPAv1_NewWF_Hgut_3_A.csv
	TaxMP_MPAv1_NewWF_Hgut_3_A.csv		Bacteria	Unknown Kingdom	Firmicutes	Bacilli	Lactobacillales	Enterococcaceae	Enterococcus	Enterococcus faecium	Unknown Subspecies	1	1		TaxMP_MPAv1_NewWF_Hgut_3_A.csv
	TaxMP_MPAv1_NewWF_Hgut_3_A.csv		Eukaryota	Metazoa	Chordata	Mammalia	Primates	Cercopithecidae	Macaca	Macaca nemestrina	Unknown Subspecies	1	1		TaxMP_MPAv1_NewWF_Hgut_3_A.csv
	TaxMP_MPAv1_NewWF_Hgut_3_A.csv		Bacteria	Unknown Kingdom	Proteobacteria	Gammaproteobacteria	Unknown Order	Unknown Family	Unknown Genus	Unknown Species	Unknown Subspecies	3	6		TaxMP_MPAv1_NewWF_Hgut_3_A.csv
	TaxMP_MPAv1_NewWF_Hgut_3_A.csv		Eukaryota	Metazoa	Chordata	Mammalia	Carnivora	Felidae	Felis	Felis catus	Unknown Subspecies	1	1		TaxMP_MPAv1_NewWF_Hgut_3_A.csv
	TaxMP_MPAv1_NewWF_Hgut_3_A.csv		Eukaryota	Viridiplantae	Streptophyta	Unknown Class	Lamiales	Pedaliaceae	Sesamum	Sesamum indicum	Unknown Subspecies	7	13		TaxMP_MPAv1_NewWF_Hgut_3_A.csv
	TaxMP_MPAv1_NewWF_Hgut_3_A.csv		Bacteria	Unknown Kingdom	Firmicutes	Unknown Class	Unknown Order	Unknown Family	Unknown Genus	Unknown Species	Unknown Subspecies	2	2		TaxMP_MPAv1_NewWF_Hgut_3_A.csv
	TaxMP_MPAv1_NewWF_Hgut_3_A.csv		Eukaryota	Metazoa	Chordata	Mammalia	Unknown Order	Suidae	Sus	Sus scrofa	Unknown Subspecies	2	9		TaxMP_MPAv1_NewWF_Hgut_3_A.csv
	TaxMP_MPAv1_NewWF_Hgut_3_A.csv		Bacteria	Unknown Kingdom	Thermotogae	Thermotogae	Thermotogales	Thermotogaceae	Thermotoga	Thermotoga petrophila	Thermotoga petrophila RKU-1	1	1		TaxMP_MPAv1_NewWF_Hgut_3_A.csv
	TaxMP_MPAv1_NewWF_Hgut_3_A.csv		Eukaryota	Metazoa	Chordata	Mammalia	Unknown Order	Unknown Family	Unknown Genus	Unknown Species	Unknown Subspecies	18	34		TaxMP_MPAv1_NewWF_Hgut_3_A.csv
	TaxMP_MPAv1_NewWF_Hgut_3_A.csv		Eukaryota	Metazoa	Chordata	Mammalia	Primates	Unknown Family	Unknown Genus	Unknown Species	Unknown Subspecies	2	5		TaxMP_MPAv1_NewWF_Hgut_3_A.csv
	TaxMP_MPAv1_NewWF_Hgut_3_A.csv		Bacteria	Unknown Kingdom	Chlamydiae	Chlamydiia	Chlamydiales	Chlamydiaceae	Chlamydophila	Chlamydophila caviae	Chlamydophila caviae GPIC	1	1		TaxMP_MPAv1_NewWF_Hgut_3_A.csv
	TaxMP_MPAv1_NewWF_Hgut_3_A.csv		Bacteria	Unknown Kingdom	Firmicutes	Clostridia	Clostridiales	Clostridiaceae	Clostridium	Clostridium symbiosum	Unknown Subspecies	1	1		TaxMP_MPAv1_NewWF_Hgut_3_A.csv
	TaxMP_MPAv1_NewWF_Hgut_3_A.csv		Bacteria	Unknown Kingdom	Firmicutes	Bacilli	Bacillales	Unknown Family	Unknown Genus	Unknown Species	Unknown Subspecies	1	1		TaxMP_MPAv1_NewWF_Hgut_3_A.csv
	TaxMP_MPAv1_NewWF_Hgut_3_A.csv		Eukaryota	Metazoa	Chordata	Mammalia	Rodentia	Muridae	Mus	Mus musculus	Unknown Subspecies	8	19		TaxMP_MPAv1_NewWF_Hgut_3_A.csv
	TaxMP_MPAv1_NewWF_Hgut_3_A.csv		Bacteria	Unknown Kingdom	Fibrobacteres	Fibrobacteria	Fibrobacterales	Fibrobacteraceae	Fibrobacter	Fibrobacter succinogenes subsp. succinogenes S85	Fibrobacter succinogenes subsp. succinogenes	1	1		TaxMP_MPAv1_NewWF_Hgut_3_A.csv
	TaxMP_MPAv1_NewWF_Hgut_3_A.csv		Eukaryota	Fungi	Ascomycota	Saccharomycetes	Saccharomycetales	Unknown Family	Candida	Candida albicans	Candida albicans SC5314	1	1		TaxMP_MPAv1_NewWF_Hgut_3_A.csv
	TaxMP_MPAv1_NewWF_Hgut_3_A.csv		Eukaryota	Metazoa	Chordata	Mammalia	Primates	Hominidae	Gorilla	Gorilla gorilla	Gorilla gorilla gorilla	1	1		TaxMP_MPAv1_NewWF_Hgut_3_A.csv
	TaxMP_MPAv1_NewWF_Hgut_3_A.csv		Bacteria	Unknown Kingdom	Proteobacteria	Epsilonproteobacteria	Campylobacterales	Campylobacteraceae	Arcobacter	Arcobacter butzleri	Arcobacter butzleri RM4018	1	1		TaxMP_MPAv1_NewWF_Hgut_3_A.csv
	TaxMP_MPAv1_NewWF_Hgut_3_B.csv		Bacteria	Unknown Kingdom	Bacteroidetes	Bacteroidia	Bacteroidales	Bacteroidaceae	Bacteroides	Bacteroides vulgatus	Bacteroides vulgatus ATCC 8482	4	4		TaxMP_MPAv1_NewWF_Hgut_3_B.csv
	TaxMP_MPAv1_NewWF_Hgut_3_B.csv		Unknown Superkingdom	Unknown Kingdom	Unknown Phylum	Unknown Class	Unknown Order	Unknown Family	Unknown Genus	Unknown Species	Unknown Subspecies	1535	3070		TaxMP_MPAv1_NewWF_Hgut_3_B.csv
	TaxMP_MPAv1_NewWF_Hgut_3_B.csv		Eukaryota	Metazoa	Arthropoda	Merostomata	Xiphosura	Limulidae	Limulus	Limulus polyphemus	Unknown Subspecies	1	2		TaxMP_MPAv1_NewWF_Hgut_3_B.csv
	TaxMP_MPAv1_NewWF_Hgut_3_B.csv		Bacteria	Unknown Kingdom	Unknown Phylum	Unknown Class	Unknown Order	Unknown Family	Unknown Genus	Unknown Species	Unknown Subspecies	1	1		TaxMP_MPAv1_NewWF_Hgut_3_B.csv
	TaxMP_MPAv1_NewWF_Hgut_3_B.csv		Eukaryota	Metazoa	Chordata	Mammalia	Primates	Hominidae	Unknown Genus	Unknown Species	Unknown Subspecies	9	20		TaxMP_MPAv1_NewWF_Hgut_3_B.csv
	TaxMP_MPAv1_NewWF_Hgut_3_B.csv		Eukaryota	Metazoa	Chordata	Mammalia	Primates	Hominidae	Homo	Homo sapiens	Unknown Subspecies	17	34		TaxMP_MPAv1_NewWF_Hgut_3_B.csv
	TaxMP_MPAv1_NewWF_Hgut_3_B.csv		Eukaryota	Metazoa	Chordata	Aves	Galliformes	Phasianidae	Gallus	Gallus gallus	Unknown Subspecies	6	8		TaxMP_MPAv1_NewWF_Hgut_3_B.csv
	TaxMP_MPAv1_NewWF_Hgut_3_B.csv		Eukaryota	Unknown Kingdom	Unknown Phylum	Unknown Class	Unknown Order	Unknown Family	Unknown Genus	Unknown Species	Unknown Subspecies	9	5		TaxMP_MPAv1_NewWF_Hgut_3_B.csv
	TaxMP_MPAv1_NewWF_Hgut_3_B.csv		Eukaryota	Viridiplantae	Streptophyta	Unknown Class	Fabales	Fabaceae	Glycine	Glycine max	Unknown Subspecies	1	1		TaxMP_MPAv1_NewWF_Hgut_3_B.csv
	TaxMP_MPAv1_NewWF_Hgut_3_B.csv		Bacteria	Unknown Kingdom	Bacteroidetes	Bacteroidia	Bacteroidales	Bacteroidaceae	Bacteroides	Bacteroides thetaiotaomicron	Bacteroides thetaiotaomicron VPI-5482	1	1		TaxMP_MPAv1_NewWF_Hgut_3_B.csv
	TaxMP_MPAv1_NewWF_Hgut_3_B.csv		Eukaryota	Viridiplantae	Streptophyta	Liliopsida	Poales	Poaceae	Oryza	Oryza sativa	Oryza sativa Japonica Group	1	1		TaxMP_MPAv1_NewWF_Hgut_3_B.csv
	TaxMP_MPAv1_NewWF_Hgut_3_B.csv		Eukaryota	Fungi	Ascomycota	Dothideomycetes	Dothideales	Dothioraceae	Aureobasidium	Aureobasidium pullulans	Unknown Subspecies	1	1		TaxMP_MPAv1_NewWF_Hgut_3_B.csv
	TaxMP_MPAv1_NewWF_Hgut_3_B.csv		Eukaryota	Metazoa	Chordata	Aves	Unknown Order	Unknown Family	Unknown Genus	Unknown Species	Unknown Subspecies	3	6		TaxMP_MPAv1_NewWF_Hgut_3_B.csv
	TaxMP_MPAv1_NewWF_Hgut_3_B.csv		Eukaryota	Fungi	Unknown Phylum	Unknown Class	Unknown Order	Unknown Family	Unknown Genus	Unknown Species	Unknown Subspecies	2	2		TaxMP_MPAv1_NewWF_Hgut_3_B.csv
	TaxMP_MPAv1_NewWF_Hgut_3_B.csv		Eukaryota	Metazoa	Chordata	Mammalia	Carnivora	Canidae	Canis	Canis lupus	Canis lupus familiaris	1	1		TaxMP_MPAv1_NewWF_Hgut_3_B.csv
	TaxMP_MPAv1_NewWF_Hgut_3_B.csv		Eukaryota	Metazoa	Chordata	Aves	Galliformes	Phasianidae	Meleagris	Meleagris gallopavo	Unknown Subspecies	1	2		TaxMP_MPAv1_NewWF_Hgut_3_B.csv
	TaxMP_MPAv1_NewWF_Hgut_3_B.csv		Eukaryota	Metazoa	Chordata	Mammalia	Rodentia	Muridae	Unknown Genus	Unknown Species	Unknown Subspecies	1	2		TaxMP_MPAv1_NewWF_Hgut_3_B.csv
	TaxMP_MPAv1_NewWF_Hgut_3_B.csv		Eukaryota	Viridiplantae	Streptophyta	Liliopsida	Poales	Poaceae	Triticum	Triticum aestivum	Unknown Subspecies	1	1		TaxMP_MPAv1_NewWF_Hgut_3_B.csv
	TaxMP_MPAv1_NewWF_Hgut_3_B.csv		Eukaryota	Viridiplantae	Streptophyta	Unknown Class	Lamiales	Pedaliaceae	Sesamum	Sesamum indicum	Unknown Subspecies	10	18		TaxMP_MPAv1_NewWF_Hgut_3_B.csv
	TaxMP_MPAv1_NewWF_Hgut_3_B.csv		Bacteria	Unknown Kingdom	Firmicutes	Unknown Class	Unknown Order	Unknown Family	Unknown Genus	Unknown Species	Unknown Subspecies	1	2		TaxMP_MPAv1_NewWF_Hgut_3_B.csv
	TaxMP_MPAv1_NewWF_Hgut_3_B.csv		Eukaryota	Fungi	Ascomycota	Saccharomycetes	Saccharomycetales	Saccharomycetaceae	Zygosaccharomyces	Zygosaccharomyces bailii	Unknown Subspecies	1	1		TaxMP_MPAv1_NewWF_Hgut_3_B.csv
	TaxMP_MPAv1_NewWF_Hgut_3_B.csv		Eukaryota	Metazoa	Chordata	Mammalia	Unknown Order	Suidae	Sus	Sus scrofa	Unknown Subspecies	2	5		TaxMP_MPAv1_NewWF_Hgut_3_B.csv
	TaxMP_MPAv1_NewWF_Hgut_3_B.csv		Eukaryota	Metazoa	Chordata	Unknown Class	Unknown Order	Unknown Family	Unknown Genus	Unknown Species	Unknown Subspecies	8	22		TaxMP_MPAv1_NewWF_Hgut_3_B.csv
	TaxMP_MPAv1_NewWF_Hgut_3_B.csv		Eukaryota	Metazoa	Chordata	Mammalia	Unknown Order	Unknown Family	Unknown Genus	Unknown Species	Unknown Subspecies	10	16		TaxMP_MPAv1_NewWF_Hgut_3_B.csv
	TaxMP_MPAv1_NewWF_Hgut_3_B.csv		Eukaryota	Metazoa	Chordata	Mammalia	Primates	Unknown Family	Unknown Genus	Unknown Species	Unknown Subspecies	2	3		TaxMP_MPAv1_NewWF_Hgut_3_B.csv
	TaxMP_MPAv1_NewWF_Hgut_3_B.csv		Bacteria	Unknown Kingdom	Firmicutes	Clostridia	Clostridiales	Eubacteriaceae	Eubacterium	Eubacterium eligens	Eubacterium eligens ATCC 27750	1	1		TaxMP_MPAv1_NewWF_Hgut_3_B.csv
	TaxMP_MPAv1_NewWF_Hgut_3_B.csv		Bacteria	Unknown Kingdom	Firmicutes	Clostridia	Clostridiales	Eubacteriaceae	Eubacterium	Eubacterium rectale	Eubacterium rectale ATCC 33656	3	3		TaxMP_MPAv1_NewWF_Hgut_3_B.csv
	TaxMP_MPAv1_NewWF_Hgut_3_B.csv		Bacteria	Unknown Kingdom	Proteobacteria	Gammaproteobacteria	Enterobacteriales	Enterobacteriaceae	Cronobacter	Cronobacter sakazakii	Cronobacter sakazakii ATCC BAA-894	1	1		TaxMP_MPAv1_NewWF_Hgut_3_B.csv
	TaxMP_MPAv1_NewWF_Hgut_3_B.csv		Bacteria	Unknown Kingdom	Chlamydiae	Chlamydiia	Chlamydiales	Chlamydiaceae	Chlamydia	Chlamydia pneumoniae	Unknown Subspecies	1	1		TaxMP_MPAv1_NewWF_Hgut_3_B.csv
	TaxMP_MPAv1_NewWF_Hgut_3_B.csv		Eukaryota	Metazoa	Chordata	Mammalia	Rodentia	Muridae	Mus	Mus musculus	Unknown Subspecies	5	9		TaxMP_MPAv1_NewWF_Hgut_3_B.csv
	TaxMP_MPAv1_NewWF_Hgut_3_B.csv		Eukaryota	Fungi	Ascomycota	Saccharomycetes	Saccharomycetales	Saccharomycetaceae	Kluyveromyces	Kluyveromyces lactis	Kluyveromyces lactis NRRL Y-1140	1	1		TaxMP_MPAv1_NewWF_Hgut_3_B.csv
	TaxMP_MPAv1_NewWF_Hgut_3_B.csv		Bacteria	Unknown Kingdom	Firmicutes	Bacilli	Bacillales	Bacillaceae	Bacillus	Unknown Species	Unknown Subspecies	1	2		TaxMP_MPAv1_NewWF_Hgut_3_B.csv
	TaxMP_MPAv1_NewWF_Hgut_3_B.csv		Bacteria	Unknown Kingdom	Bacteroidetes	Bacteroidia	Bacteroidales	Bacteroidaceae	Bacteroides	Bacteroides fragilis	Bacteroides fragilis NCTC 9343	1	1		TaxMP_MPAv1_NewWF_Hgut_3_B.csv
	TaxMP_MPAv1_NewWF_Hgut_3_B.csv		Bacteria	Unknown Kingdom	Proteobacteria	Betaproteobacteria	Rhodocyclales	Rhodocyclaceae	Dechloromonas	Dechloromonas aromatica	Dechloromonas aromatica RCB	1	2		TaxMP_MPAv1_NewWF_Hgut_3_B.csv
	TaxMP_MPAv1_NewWF_Hgut_3_B.csv		Eukaryota	Metazoa	Chordata	Mammalia	Rodentia	Cricetidae	Cricetulus	Cricetulus griseus	Unknown Subspecies	1	1		TaxMP_MPAv1_NewWF_Hgut_3_B.csv
	TaxMP_MPAv1_NewWF_Hgut_3_B.csv		Eukaryota	Metazoa	Chordata	Aves	Galliformes	Phasianidae	Unknown Genus	Unknown Species	Unknown Subspecies	3	4		TaxMP_MPAv1_NewWF_Hgut_3_B.csv
	TaxMP_MPAv1_NewWF_Hgut_3_B.csv		Eukaryota	Fungi	Ascomycota	Saccharomycetes	Saccharomycetales	Saccharomycetaceae	Kluyveromyces	Unknown Species	Unknown Subspecies	3	3		TaxMP_MPAv1_NewWF_Hgut_3_B.csv
	TaxMP_MPAv1_NewWF_Hgut_3_B.csv		Eukaryota	Viridiplantae	Streptophyta	Unknown Class	Fabales	Fabaceae	Pisum	Pisum sativum	Unknown Subspecies	1	1		TaxMP_MPAv1_NewWF_Hgut_3_B.csv
	TaxMP_MPAv1_NewWF_Hgut_3_B.csv		Bacteria	Unknown Kingdom	Cyanobacteria	Unknown Class	Chroococcales	Unknown Family	Synechococcus	Synechococcus sp. PCC 7002	Unknown Subspecies	1	1		TaxMP_MPAv1_NewWF_Hgut_3_B.csv
	TaxMP_MPAv1_NewWF_Hgut_3_B.csv		Bacteria	Unknown Kingdom	Proteobacteria	Gammaproteobacteria	Enterobacteriales	Enterobacteriaceae	Escherichia	Escherichia coli	Unknown Subspecies	1	1		TaxMP_MPAv1_NewWF_Hgut_3_B.csv
	TaxMP_MPAv1_NewWF_Hgut_3_B.csv		Eukaryota	Fungi	Ascomycota	Saccharomycetes	Saccharomycetales	Saccharomycetaceae	Saccharomyces	Saccharomyces cerevisiae	Saccharomyces cerevisiae S288c	2	4		TaxMP_MPAv1_NewWF_Hgut_3_B.csv
	TaxMP_MPAv1_NewWF_Hgut_3_B.csv		Bacteria	Unknown Kingdom	Firmicutes	Bacilli	Unknown Order	Unknown Family	Unknown Genus	Unknown Species	Unknown Subspecies	2	2		TaxMP_MPAv1_NewWF_Hgut_3_B.csv
	TaxMP_MPAv1_NewWF_Hgut_3_B.csv		Bacteria	Unknown Kingdom	Firmicutes	Clostridia	Clostridiales	Clostridiaceae	Clostridium	Clostridium phytofermentans	Clostridium phytofermentans ISDg	1	1		TaxMP_MPAv1_NewWF_Hgut_3_B.csv
	TaxMP_MPAv1_NewWF_Hgut_3_B.csv		Eukaryota	Metazoa	Unknown Phylum	Unknown Class	Unknown Order	Unknown Family	Unknown Genus	Unknown Species	Unknown Subspecies	1	3		TaxMP_MPAv1_NewWF_Hgut_3_B.csv
	TaxMP_MPAv1_NewWF_Hgut_3_B.csv		Eukaryota	Metazoa	Chordata	Mammalia	Unknown Order	Bovidae	Bos	Bos taurus	Unknown Subspecies	4	5		TaxMP_MPAv1_NewWF_Hgut_3_B.csv
	TaxMP_MPAv1_NewWF_Hgut_3_B.csv		Bacteria	Unknown Kingdom	Proteobacteria	Gammaproteobacteria	Chromatiales	Chromatiaceae	Nitrosococcus	Nitrosococcus oceani	Nitrosococcus oceani ATCC 19707	1	3		TaxMP_MPAv1_NewWF_Hgut_3_B.csv
	TaxMP_MPAv1_NewWF_Hgut_3_B.csv		Bacteria	Unknown Kingdom	Acidobacteria	Unknown Class	Unknown Order	Unknown Family	Unknown Genus	Unknown Species	Unknown Subspecies	1	1		TaxMP_MPAv1_NewWF_Hgut_3_B.csv
	TaxMP_MPAv1_NewWF_Hgut_3_B.csv		Bacteria	Unknown Kingdom	Proteobacteria	Gammaproteobacteria	Enterobacteriales	Enterobacteriaceae	Klebsiella	Klebsiella pneumoniae	Unknown Subspecies	2	4		TaxMP_MPAv1_NewWF_Hgut_3_B.csv
	TaxMP_MPAv1_NewWF_Hgut_3_C.csv		Bacteria	Unknown Kingdom	Bacteroidetes	Bacteroidia	Bacteroidales	Bacteroidaceae	Bacteroides	Bacteroides vulgatus	Bacteroides vulgatus ATCC 8482	5	6		TaxMP_MPAv1_NewWF_Hgut_3_C.csv
	TaxMP_MPAv1_NewWF_Hgut_3_C.csv		Unknown Superkingdom	Unknown Kingdom	Unknown Phylum	Unknown Class	Unknown Order	Unknown Family	Unknown Genus	Unknown Species	Unknown Subspecies	1410	2518		TaxMP_MPAv1_NewWF_Hgut_3_C.csv
	TaxMP_MPAv1_NewWF_Hgut_3_C.csv		Eukaryota	Metazoa	Chordata	Mammalia	Primates	Hominidae	Pongo	Pongo abelii	Unknown Subspecies	1	1		TaxMP_MPAv1_NewWF_Hgut_3_C.csv
	TaxMP_MPAv1_NewWF_Hgut_3_C.csv		Bacteria	Unknown Kingdom	Unknown Phylum	Unknown Class	Unknown Order	Unknown Family	Unknown Genus	Unknown Species	Unknown Subspecies	2	2		TaxMP_MPAv1_NewWF_Hgut_3_C.csv
	TaxMP_MPAv1_NewWF_Hgut_3_C.csv		Eukaryota	Metazoa	Chordata	Mammalia	Rodentia	Muridae	Rattus	Rattus norvegicus	Unknown Subspecies	1	1		TaxMP_MPAv1_NewWF_Hgut_3_C.csv
	TaxMP_MPAv1_NewWF_Hgut_3_C.csv		Eukaryota	Metazoa	Chordata	Mammalia	Primates	Hominidae	Unknown Genus	Unknown Species	Unknown Subspecies	5	12		TaxMP_MPAv1_NewWF_Hgut_3_C.csv
	TaxMP_MPAv1_NewWF_Hgut_3_C.csv		Bacteria	Unknown Kingdom	Proteobacteria	Gammaproteobacteria	Enterobacteriales	Enterobacteriaceae	Escherichia	Escherichia coli	Escherichia coli K-12	1	2		TaxMP_MPAv1_NewWF_Hgut_3_C.csv
	TaxMP_MPAv1_NewWF_Hgut_3_C.csv		Eukaryota	Metazoa	Chordata	Mammalia	Primates	Hominidae	Homo	Homo sapiens	Unknown Subspecies	14	29		TaxMP_MPAv1_NewWF_Hgut_3_C.csv
	TaxMP_MPAv1_NewWF_Hgut_3_C.csv		Eukaryota	Viridiplantae	Streptophyta	Unknown Class	Fabales	Fabaceae	Glycine	Glycine max	Unknown Subspecies	1	1		TaxMP_MPAv1_NewWF_Hgut_3_C.csv
	TaxMP_MPAv1_NewWF_Hgut_3_C.csv		Eukaryota	Fungi	Ascomycota	Schizosaccharomycetes	Schizosaccharomycetales	Schizosaccharomycetaceae	Schizosaccharomyces	Schizosaccharomyces pombe	Schizosaccharomyces pombe 972h-	1	1		TaxMP_MPAv1_NewWF_Hgut_3_C.csv
	TaxMP_MPAv1_NewWF_Hgut_3_C.csv		Eukaryota	Unknown Kingdom	Unknown Phylum	Unknown Class	Dictyosteliida	Unknown Family	Dictyostelium	Dictyostelium discoideum	Unknown Subspecies	1	1		TaxMP_MPAv1_NewWF_Hgut_3_C.csv
	TaxMP_MPAv1_NewWF_Hgut_3_C.csv		Eukaryota	Viridiplantae	Streptophyta	Liliopsida	Poales	Poaceae	Avena	Avena sativa	Unknown Subspecies	3	4		TaxMP_MPAv1_NewWF_Hgut_3_C.csv
	TaxMP_MPAv1_NewWF_Hgut_3_C.csv		Eukaryota	Metazoa	Chordata	Mammalia	Carnivora	Unknown Family	Unknown Genus	Unknown Species	Unknown Subspecies	1	2		TaxMP_MPAv1_NewWF_Hgut_3_C.csv
	TaxMP_MPAv1_NewWF_Hgut_3_C.csv		Eukaryota	Viridiplantae	Streptophyta	Unknown Class	Solanales	Convolvulaceae	Ipomoea	Ipomoea batatas	Unknown Subspecies	1	1		TaxMP_MPAv1_NewWF_Hgut_3_C.csv
	TaxMP_MPAv1_NewWF_Hgut_3_C.csv		Bacteria	Unknown Kingdom	Acidobacteria	Solibacteres	Solibacterales	Solibacteraceae	Candidatus Solibacter	Candidatus Solibacter usitatus	Candidatus Solibacter usitatus Ellin6076	1	2		TaxMP_MPAv1_NewWF_Hgut_3_C.csv
	TaxMP_MPAv1_NewWF_Hgut_3_C.csv		Eukaryota	Fungi	Ascomycota	Saccharomycetes	Saccharomycetales	Saccharomycetaceae	Unknown Genus	Unknown Species	Unknown Subspecies	1	2		TaxMP_MPAv1_NewWF_Hgut_3_C.csv
	TaxMP_MPAv1_NewWF_Hgut_3_C.csv		Eukaryota	Metazoa	Chordata	Unknown Class	Unknown Order	Unknown Family	Unknown Genus	Unknown Species	Unknown Subspecies	4	8		TaxMP_MPAv1_NewWF_Hgut_3_C.csv
	TaxMP_MPAv1_NewWF_Hgut_3_C.csv		Bacteria	Unknown Kingdom	Proteobacteria	Gammaproteobacteria	Enterobacteriales	Enterobacteriaceae	Unknown Genus	Unknown Species	Unknown Subspecies	1	2		TaxMP_MPAv1_NewWF_Hgut_3_C.csv
	TaxMP_MPAv1_NewWF_Hgut_3_C.csv		Bacteria	Unknown Kingdom	Firmicutes	Clostridia	Clostridiales	Eubacteriaceae	Eubacterium	Eubacterium rectale	Eubacterium rectale ATCC 33656	2	3		TaxMP_MPAv1_NewWF_Hgut_3_C.csv
	TaxMP_MPAv1_NewWF_Hgut_3_C.csv		Eukaryota	Metazoa	Chordata	Ascidiacea	Stolidobranchia	Unknown Family	Unknown Genus	Unknown Species	Unknown Subspecies	1	1		TaxMP_MPAv1_NewWF_Hgut_3_C.csv
	TaxMP_MPAv1_NewWF_Hgut_3_C.csv		Eukaryota	Fungi	Ascomycota	Saccharomycetes	Saccharomycetales	Saccharomycetaceae	Kluyveromyces	Kluyveromyces lactis	Kluyveromyces lactis NRRL Y-1140	2	1		TaxMP_MPAv1_NewWF_Hgut_3_C.csv
	TaxMP_MPAv1_NewWF_Hgut_3_C.csv		Eukaryota	Metazoa	Chordata	Mammalia	Rodentia	Sciuridae	Ictidomys	Ictidomys tridecemlineatus	Unknown Subspecies	1	1		TaxMP_MPAv1_NewWF_Hgut_3_C.csv
	TaxMP_MPAv1_NewWF_Hgut_3_C.csv		Bacteria	Unknown Kingdom	Bacteroidetes	Bacteroidia	Bacteroidales	Bacteroidaceae	Bacteroides	Bacteroides fragilis	Bacteroides fragilis NCTC 9343	2	2		TaxMP_MPAv1_NewWF_Hgut_3_C.csv
	TaxMP_MPAv1_NewWF_Hgut_3_C.csv		Eukaryota	Metazoa	Chordata	Aves	Galliformes	Phasianidae	Unknown Genus	Unknown Species	Unknown Subspecies	4	14		TaxMP_MPAv1_NewWF_Hgut_3_C.csv
	TaxMP_MPAv1_NewWF_Hgut_3_C.csv		Bacteria	Unknown Kingdom	Firmicutes	Clostridia	Clostridiales	Unknown Family	Unknown Genus	Unknown Species	Unknown Subspecies	1	2		TaxMP_MPAv1_NewWF_Hgut_3_C.csv
	TaxMP_MPAv1_NewWF_Hgut_3_C.csv		Eukaryota	Fungi	Ascomycota	Saccharomycetes	Saccharomycetales	Saccharomycetaceae	Saccharomyces	Saccharomyces cerevisiae	Saccharomyces cerevisiae S288c	1	2		TaxMP_MPAv1_NewWF_Hgut_3_C.csv
	TaxMP_MPAv1_NewWF_Hgut_3_C.csv		Eukaryota	Metazoa	Unknown Phylum	Unknown Class	Unknown Order	Unknown Family	Unknown Genus	Unknown Species	Unknown Subspecies	4	7		TaxMP_MPAv1_NewWF_Hgut_3_C.csv
	TaxMP_MPAv1_NewWF_Hgut_3_C.csv		Eukaryota	Viridiplantae	Streptophyta	Unknown Class	Malvales	Malvaceae	Theobroma	Theobroma cacao	Unknown Subspecies	1	1		TaxMP_MPAv1_NewWF_Hgut_3_C.csv
	TaxMP_MPAv1_NewWF_Hgut_3_C.csv		Eukaryota	Metazoa	Chordata	Mammalia	Unknown Order	Bovidae	Bos	Bos taurus	Unknown Subspecies	3	3		TaxMP_MPAv1_NewWF_Hgut_3_C.csv
	TaxMP_MPAv1_NewWF_Hgut_3_C.csv		Bacteria	Unknown Kingdom	Proteobacteria	Gammaproteobacteria	Enterobacteriales	Enterobacteriaceae	Klebsiella	Klebsiella pneumoniae	Unknown Subspecies	1	1		TaxMP_MPAv1_NewWF_Hgut_3_C.csv
	TaxMP_MPAv1_NewWF_Hgut_3_C.csv		Eukaryota	Metazoa	Chordata	Mammalia	Primates	Cercopithecidae	Macaca	Macaca fascicularis	Unknown Subspecies	2	2		TaxMP_MPAv1_NewWF_Hgut_3_C.csv
	TaxMP_MPAv1_NewWF_Hgut_3_C.csv		Eukaryota	Metazoa	Chordata	Aves	Galliformes	Phasianidae	Gallus	Gallus gallus	Unknown Subspecies	6	8		TaxMP_MPAv1_NewWF_Hgut_3_C.csv
	TaxMP_MPAv1_NewWF_Hgut_3_C.csv		Eukaryota	Unknown Kingdom	Unknown Phylum	Unknown Class	Unknown Order	Unknown Family	Unknown Genus	Unknown Species	Unknown Subspecies	9	14		TaxMP_MPAv1_NewWF_Hgut_3_C.csv
	TaxMP_MPAv1_NewWF_Hgut_3_C.csv		Eukaryota	Metazoa	Chordata	Mammalia	Primates	Cercopithecidae	Macaca	Macaca mulatta	Unknown Subspecies	1	1		TaxMP_MPAv1_NewWF_Hgut_3_C.csv
	TaxMP_MPAv1_NewWF_Hgut_3_C.csv		Eukaryota	Fungi	Ascomycota	Dothideomycetes	Dothideales	Dothioraceae	Aureobasidium	Aureobasidium pullulans	Unknown Subspecies	1	1		TaxMP_MPAv1_NewWF_Hgut_3_C.csv
	TaxMP_MPAv1_NewWF_Hgut_3_C.csv		Eukaryota	Metazoa	Chordata	Aves	Unknown Order	Unknown Family	Unknown Genus	Unknown Species	Unknown Subspecies	1	3		TaxMP_MPAv1_NewWF_Hgut_3_C.csv
	TaxMP_MPAv1_NewWF_Hgut_3_C.csv		Bacteria	Unknown Kingdom	Actinobacteria	Actinobacteria	Bifidobacteriales	Bifidobacteriaceae	Bifidobacterium	Bifidobacterium longum	Bifidobacterium longum NCC2705	1	1		TaxMP_MPAv1_NewWF_Hgut_3_C.csv
	TaxMP_MPAv1_NewWF_Hgut_3_C.csv		Bacteria	Unknown Kingdom	Proteobacteria	Gammaproteobacteria	Unknown Order	Unknown Family	Unknown Genus	Unknown Species	Unknown Subspecies	2	3		TaxMP_MPAv1_NewWF_Hgut_3_C.csv
	TaxMP_MPAv1_NewWF_Hgut_3_C.csv		Eukaryota	Metazoa	Chordata	Mammalia	Carnivora	Felidae	Felis	Felis catus	Unknown Subspecies	1	1		TaxMP_MPAv1_NewWF_Hgut_3_C.csv
	TaxMP_MPAv1_NewWF_Hgut_3_C.csv		Eukaryota	Viridiplantae	Streptophyta	Unknown Class	Lamiales	Pedaliaceae	Sesamum	Sesamum indicum	Unknown Subspecies	8	13		TaxMP_MPAv1_NewWF_Hgut_3_C.csv
	TaxMP_MPAv1_NewWF_Hgut_3_C.csv		Bacteria	Unknown Kingdom	Firmicutes	Unknown Class	Unknown Order	Unknown Family	Unknown Genus	Unknown Species	Unknown Subspecies	2	1		TaxMP_MPAv1_NewWF_Hgut_3_C.csv
	TaxMP_MPAv1_NewWF_Hgut_3_C.csv		Eukaryota	Metazoa	Chordata	Unknown Class	Coelacanthiformes	Coelacanthidae	Latimeria	Latimeria chalumnae	Unknown Subspecies	1	1		TaxMP_MPAv1_NewWF_Hgut_3_C.csv
	TaxMP_MPAv1_NewWF_Hgut_3_C.csv		Eukaryota	Metazoa	Chordata	Mammalia	Unknown Order	Suidae	Sus	Sus scrofa	Unknown Subspecies	2	4		TaxMP_MPAv1_NewWF_Hgut_3_C.csv
	TaxMP_MPAv1_NewWF_Hgut_3_C.csv		Eukaryota	Metazoa	Chordata	Mammalia	Unknown Order	Unknown Family	Unknown Genus	Unknown Species	Unknown Subspecies	13	22		TaxMP_MPAv1_NewWF_Hgut_3_C.csv
	TaxMP_MPAv1_NewWF_Hgut_3_C.csv		Bacteria	Unknown Kingdom	Bacteroidetes	Cytophagia	Cytophagales	Cytophagaceae	Cytophaga	Cytophaga hutchinsonii	Cytophaga hutchinsonii ATCC 33406	1	1		TaxMP_MPAv1_NewWF_Hgut_3_C.csv
	TaxMP_MPAv1_NewWF_Hgut_3_C.csv		Bacteria	Unknown Kingdom	Firmicutes	Clostridia	Clostridiales	Clostridiaceae	Alkaliphilus	Alkaliphilus oremlandii	Alkaliphilus oremlandii OhILAs	1	1		TaxMP_MPAv1_NewWF_Hgut_3_C.csv
	TaxMP_MPAv1_NewWF_Hgut_3_C.csv		Bacteria	Unknown Kingdom	Firmicutes	Bacilli	Bacillales	Unknown Family	Unknown Genus	Unknown Species	Unknown Subspecies	1	2		TaxMP_MPAv1_NewWF_Hgut_3_C.csv
	TaxMP_MPAv1_NewWF_Hgut_3_C.csv		Bacteria	Unknown Kingdom	Firmicutes	Bacilli	Lactobacillales	Lactobacillaceae	Lactobacillus	Lactobacillus acidophilus	Lactobacillus acidophilus NCFM	1	2		TaxMP_MPAv1_NewWF_Hgut_3_C.csv
	TaxMP_MPAv1_NewWF_Hgut_3_C.csv		Eukaryota	Metazoa	Chordata	Mammalia	Rodentia	Muridae	Mus	Mus musculus	Unknown Subspecies	2	7		TaxMP_MPAv1_NewWF_Hgut_3_C.csv
	TaxMP_MPAv1_NewWF_Hgut_3_C.csv		Bacteria	Unknown Kingdom	Proteobacteria	Gammaproteobacteria	Vibrionales	Vibrionaceae	Vibrio	Vibrio cholerae	Vibrio cholerae O395	1	1		TaxMP_MPAv1_NewWF_Hgut_3_C.csv
	TaxMP_MPAv1_NewWF_Hgut_3_C.csv		Eukaryota	Metazoa	Chordata	Mammalia	Primates	Hominidae	Gorilla	Gorilla gorilla	Gorilla gorilla gorilla	1	1		TaxMP_MPAv1_NewWF_Hgut_3_C.csv
	TaxMP_MPAv1_NewWF_Hgut_3_C.csv		Bacteria	Unknown Kingdom	Proteobacteria	Epsilonproteobacteria	Campylobacterales	Campylobacteraceae	Arcobacter	Arcobacter butzleri	Arcobacter butzleri RM4018	1	1		TaxMP_MPAv1_NewWF_Hgut_3_C.csv
	TaxMP_MPAv1_NewWF_Hgut_3_C.csv		Eukaryota	Fungi	Ascomycota	Leotiomycetes	Helotiales	Sclerotiniaceae	Sclerotinia	Sclerotinia sclerotiorum	Sclerotinia sclerotiorum 1980 UF-70	1	1		TaxMP_MPAv1_NewWF_Hgut_3_C.csv
	TaxMP_MPAv1_NewWF_Hgut_3_C.csv		Bacteria	Unknown Kingdom	Tenericutes	Mollicutes	Mycoplasmatales	Mycoplasmataceae	Mycoplasma	Mycoplasma pneumoniae	Mycoplasma pneumoniae M129	1	1		TaxMP_MPAv1_NewWF_Hgut_3_C.csv
	TaxMP_MPAv1_NewWF_Hgut_3_C.csv		Eukaryota	Viridiplantae	Streptophyta	Liliopsida	Poales	Poaceae	Unknown Genus	Unknown Species	Unknown Subspecies	2	3		TaxMP_MPAv1_NewWF_Hgut_3_C.csv
	TaxMP_MPAv1_NewWF_KompostA.csv		Unknown Superkingdom	Unknown Kingdom	Unknown Phylum	Unknown Class	Unknown Order	Unknown Family	Unknown Genus	Unknown Species	Unknown Subspecies	37	46		TaxMP_MPAv1_NewWF_KompostA.csv
	TaxMP_MPAv1_NewWF_KompostA.csv		Bacteria	Unknown Kingdom	Unknown Phylum	Unknown Class	Unknown Order	Unknown Family	Unknown Genus	Unknown Species	Unknown Subspecies	13	15		TaxMP_MPAv1_NewWF_KompostA.csv
	TaxMP_MPAv1_NewWF_KompostA.csv		Eukaryota	Fungi	Ascomycota	Sordariomycetes	Sordariales	Sordariaceae	Neurospora	Neurospora crassa	Neurospora crassa OR74A	4	5		TaxMP_MPAv1_NewWF_KompostA.csv
	TaxMP_MPAv1_NewWF_KompostA.csv		Eukaryota	Unknown Kingdom	Unknown Phylum	Heterolobosea	Schizopyrenida	Vahlkampfiidae	Naegleria	Naegleria fowleri	Unknown Subspecies	1	1		TaxMP_MPAv1_NewWF_KompostA.csv
	TaxMP_MPAv1_NewWF_KompostA.csv		Bacteria	Unknown Kingdom	Actinobacteria	Actinobacteria	Actinomycetales	Streptomycetaceae	Streptomyces	Streptomyces ramocissimus	Unknown Subspecies	1	1		TaxMP_MPAv1_NewWF_KompostA.csv
	TaxMP_MPAv1_NewWF_KompostA.csv		Eukaryota	Metazoa	Chordata	Mammalia	Primates	Hominidae	Homo	Homo sapiens	Unknown Subspecies	2	2		TaxMP_MPAv1_NewWF_KompostA.csv
	TaxMP_MPAv1_NewWF_KompostA.csv		Bacteria	Unknown Kingdom	Firmicutes	Bacilli	Bacillales	Bacillaceae	Geobacillus	Geobacillus kaustophilus	Geobacillus kaustophilus HTA426	1	1		TaxMP_MPAv1_NewWF_KompostA.csv
	TaxMP_MPAv1_NewWF_KompostA.csv		Bacteria	Unknown Kingdom	Proteobacteria	Alphaproteobacteria	Rhizobiales	Bradyrhizobiaceae	Bradyrhizobium	Bradyrhizobium japonicum	Bradyrhizobium japonicum USDA 110	1	1		TaxMP_MPAv1_NewWF_KompostA.csv
	TaxMP_MPAv1_NewWF_KompostA.csv		Eukaryota	Metazoa	Chordata	Mammalia	Carnivora	Canidae	Canis	Canis lupus	Canis lupus familiaris	1	1		TaxMP_MPAv1_NewWF_KompostA.csv
	TaxMP_MPAv1_NewWF_KompostA.csv		Eukaryota	Viridiplantae	Streptophyta	Unknown Class	Solanales	Solanaceae	Solanum	Solanum tuberosum	Unknown Subspecies	1	2		TaxMP_MPAv1_NewWF_KompostA.csv
	TaxMP_MPAv1_NewWF_KompostA.csv		Bacteria	Unknown Kingdom	Planctomycetes	Planctomycetia	Planctomycetales	Planctomycetaceae	Rhodopirellula	Rhodopirellula baltica	Rhodopirellula baltica SH 1	1	1		TaxMP_MPAv1_NewWF_KompostA.csv
	TaxMP_MPAv1_NewWF_KompostA.csv		Bacteria	Unknown Kingdom	Proteobacteria	Alphaproteobacteria	Rhizobiales	Rhizobiaceae	Rhizobium	Rhizobium leguminosarum	Rhizobium leguminosarum bv. viciae 3841	2	2		TaxMP_MPAv1_NewWF_KompostA.csv
	TaxMP_MPAv1_NewWF_KompostA.csv		Eukaryota	Fungi	Ascomycota	Eurotiomycetes	Eurotiales	Trichocomaceae	Unknown Genus	Unknown Species	Unknown Subspecies	1	2		TaxMP_MPAv1_NewWF_KompostA.csv
	TaxMP_MPAv1_NewWF_KompostA.csv		Eukaryota	Fungi	Ascomycota	Unknown Class	Unknown Order	Unknown Family	Unknown Genus	Unknown Species	Unknown Subspecies	1	2		TaxMP_MPAv1_NewWF_KompostA.csv
	TaxMP_MPAv1_NewWF_KompostA.csv		Bacteria	Unknown Kingdom	Proteobacteria	Alphaproteobacteria	Rhizobiales	Bartonellaceae	Bartonella	Bartonella henselae	Bartonella henselae str. Houston-1	1	1		TaxMP_MPAv1_NewWF_KompostA.csv
	TaxMP_MPAv1_NewWF_KompostA.csv		Bacteria	Unknown Kingdom	Actinobacteria	Actinobacteria	Actinomycetales	Frankiaceae	Frankia	Frankia alni	Frankia alni ACN14a	1	1		TaxMP_MPAv1_NewWF_KompostA.csv
	TaxMP_MPAv1_NewWF_KompostA.csv		Bacteria	Unknown Kingdom	Proteobacteria	Alphaproteobacteria	Rhizobiales	Phyllobacteriaceae	Chelativorans	Chelativorans sp. BNC1	Unknown Subspecies	1	1		TaxMP_MPAv1_NewWF_KompostA.csv
	TaxMP_MPAv1_NewWF_KompostA.csv		Bacteria	Unknown Kingdom	Proteobacteria	Gammaproteobacteria	Enterobacteriales	Enterobacteriaceae	Unknown Genus	Unknown Species	Unknown Subspecies	2	4		TaxMP_MPAv1_NewWF_KompostA.csv
	TaxMP_MPAv1_NewWF_KompostA.csv		Eukaryota	Metazoa	Chordata	Unknown Class	Unknown Order	Unknown Family	Unknown Genus	Unknown Species	Unknown Subspecies	1	1		TaxMP_MPAv1_NewWF_KompostA.csv
	TaxMP_MPAv1_NewWF_KompostA.csv		Bacteria	Unknown Kingdom	Firmicutes	Clostridia	Clostridiales	Clostridiaceae	Clostridium	Clostridium botulinum	Clostridium botulinum B1 str. Okra	1	1		TaxMP_MPAv1_NewWF_KompostA.csv
	TaxMP_MPAv1_NewWF_KompostA.csv		Bacteria	Unknown Kingdom	Proteobacteria	Betaproteobacteria	Burkholderiales	Alcaligenaceae	Bordetella	Bordetella pertussis	Bordetella pertussis Tohama I	1	1		TaxMP_MPAv1_NewWF_KompostA.csv
	TaxMP_MPAv1_NewWF_KompostA.csv		Bacteria	Unknown Kingdom	Proteobacteria	Alphaproteobacteria	Rhodobacterales	Rhodobacteraceae	Rhodobacter	Rhodobacter capsulatus	Unknown Subspecies	1	1		TaxMP_MPAv1_NewWF_KompostA.csv
	TaxMP_MPAv1_NewWF_KompostA.csv		Eukaryota	Viridiplantae	Streptophyta	Unknown Class	Unknown Order	Unknown Family	Unknown Genus	Unknown Species	Unknown Subspecies	2	3		TaxMP_MPAv1_NewWF_KompostA.csv
	TaxMP_MPAv1_NewWF_KompostA.csv		Bacteria	Unknown Kingdom	Proteobacteria	Alphaproteobacteria	Rhizobiales	Rhizobiaceae	Agrobacterium	Agrobacterium fabrum	Agrobacterium fabrum str. C58	1	1		TaxMP_MPAv1_NewWF_KompostA.csv
	TaxMP_MPAv1_NewWF_KompostA.csv		Eukaryota	Fungi	Ascomycota	Eurotiomycetes	Onygenales	Ajellomycetaceae	Ajellomyces	Ajellomyces capsulatus	Unknown Subspecies	1	1		TaxMP_MPAv1_NewWF_KompostA.csv
	TaxMP_MPAv1_NewWF_KompostA.csv		Eukaryota	Fungi	Ascomycota	Sordariomycetes	Glomerellales	Glomerellaceae	Colletotrichum	Colletotrichum gloeosporioides	Unknown Subspecies	1	1		TaxMP_MPAv1_NewWF_KompostA.csv
	TaxMP_MPAv1_NewWF_KompostA.csv		Eukaryota	Viridiplantae	Streptophyta	Liliopsida	Poales	Poaceae	Oryza	Oryza sativa	Unknown Subspecies	1	2		TaxMP_MPAv1_NewWF_KompostA.csv
	TaxMP_MPAv1_NewWF_KompostA.csv		Bacteria	Unknown Kingdom	Proteobacteria	Alphaproteobacteria	Unknown Order	Unknown Family	Unknown Genus	Unknown Species	Unknown Subspecies	1	2		TaxMP_MPAv1_NewWF_KompostA.csv
	TaxMP_MPAv1_NewWF_KompostA.csv		Bacteria	Unknown Kingdom	Firmicutes	Clostridia	Clostridiales	Clostridiaceae	Clostridium	Clostridium phytofermentans	Clostridium phytofermentans ISDg	1	1		TaxMP_MPAv1_NewWF_KompostA.csv
	TaxMP_MPAv1_NewWF_KompostA.csv		Eukaryota	Fungi	Ascomycota	Saccharomycetes	Saccharomycetales	Saccharomycetaceae	Saccharomyces	Saccharomyces cerevisiae	Saccharomyces cerevisiae S288c	1	1		TaxMP_MPAv1_NewWF_KompostA.csv
	TaxMP_MPAv1_NewWF_KompostA.csv		Eukaryota	Fungi	Ascomycota	Saccharomycetes	Saccharomycetales	Saccharomycetaceae	Nakaseomyces	Candida glabrata	Candida glabrata CBS 138	1	3		TaxMP_MPAv1_NewWF_KompostA.csv
	TaxMP_MPAv1_NewWF_KompostA.csv		Eukaryota	Fungi	Ascomycota	Sordariomycetes	Hypocreales	Clavicipitaceae	Claviceps	Claviceps purpurea	Claviceps purpurea 20.1	1	1		TaxMP_MPAv1_NewWF_KompostA.csv
	TaxMP_MPAv1_NewWF_KompostA.csv		Bacteria	Unknown Kingdom	Proteobacteria	Betaproteobacteria	Unknown Order	Unknown Family	Unknown Genus	Unknown Species	Unknown Subspecies	2	1		TaxMP_MPAv1_NewWF_KompostA.csv
	TaxMP_MPAv1_NewWF_KompostA.csv		Eukaryota	Metazoa	Unknown Phylum	Unknown Class	Unknown Order	Unknown Family	Unknown Genus	Unknown Species	Unknown Subspecies	4	2		TaxMP_MPAv1_NewWF_KompostA.csv
	TaxMP_MPAv1_NewWF_KompostA.csv		Bacteria	Unknown Kingdom	Proteobacteria	Betaproteobacteria	Nitrosomonadales	Nitrosomonadaceae	Nitrosomonas	Nitrosomonas europaea	Nitrosomonas europaea ATCC 19718	1	3		TaxMP_MPAv1_NewWF_KompostA.csv
	TaxMP_MPAv1_NewWF_KompostA.csv		Eukaryota	Fungi	Ascomycota	Sordariomycetes	Hypocreales	Nectriaceae	Fusarium	Fusarium oxysporum	Fusarium oxysporum f. sp. lycopersici 4287	1	1		TaxMP_MPAv1_NewWF_KompostA.csv
	TaxMP_MPAv1_NewWF_KompostA.csv		Viruses	Unknown Kingdom	Unknown Phylum	Unknown Class	Unknown Order	Mimiviridae	Mimivirus	Acanthamoeba polyphaga mimivirus	Unknown Subspecies	2	2		TaxMP_MPAv1_NewWF_KompostA.csv
	TaxMP_MPAv1_NewWF_KompostA.csv		Bacteria	Unknown Kingdom	Proteobacteria	Gammaproteobacteria	Enterobacteriales	Enterobacteriaceae	Salmonella	Salmonella enterica	Salmonella enterica subsp. enterica	1	2		TaxMP_MPAv1_NewWF_KompostA.csv
	TaxMP_MPAv1_NewWF_KompostA.csv		Bacteria	Unknown Kingdom	Proteobacteria	Alphaproteobacteria	Rhizobiales	Rhizobiaceae	Unknown Genus	Unknown Species	Unknown Subspecies	1	1		TaxMP_MPAv1_NewWF_KompostA.csv
	TaxMP_MPAv1_NewWF_KompostA.csv		Eukaryota	Metazoa	Chordata	Aves	Galliformes	Phasianidae	Gallus	Gallus gallus	Unknown Subspecies	1	2		TaxMP_MPAv1_NewWF_KompostA.csv
	TaxMP_MPAv1_NewWF_KompostA.csv		Eukaryota	Unknown Kingdom	Unknown Phylum	Unknown Class	Unknown Order	Unknown Family	Unknown Genus	Unknown Species	Unknown Subspecies	7	8		TaxMP_MPAv1_NewWF_KompostA.csv
	TaxMP_MPAv1_NewWF_KompostA.csv		Bacteria	Unknown Kingdom	Proteobacteria	Alphaproteobacteria	Rhizobiales	Phyllobacteriaceae	Parvibaculum	Parvibaculum lavamentivorans	Parvibaculum lavamentivorans DS-1	1	1		TaxMP_MPAv1_NewWF_KompostA.csv
	TaxMP_MPAv1_NewWF_KompostA.csv		Bacteria	Unknown Kingdom	Proteobacteria	Unknown Class	Unknown Order	Unknown Family	Unknown Genus	Unknown Species	Unknown Subspecies	10	9		TaxMP_MPAv1_NewWF_KompostA.csv
	TaxMP_MPAv1_NewWF_KompostA.csv		Bacteria	Unknown Kingdom	Proteobacteria	Betaproteobacteria	Burkholderiales	Alcaligenaceae	Bordetella	Bordetella avium	Bordetella avium 197N	1	1		TaxMP_MPAv1_NewWF_KompostA.csv
	TaxMP_MPAv1_NewWF_KompostA.csv		Bacteria	Unknown Kingdom	Proteobacteria	Alphaproteobacteria	Rhizobiales	Bradyrhizobiaceae	Unknown Genus	Unknown Species	Unknown Subspecies	1	2		TaxMP_MPAv1_NewWF_KompostA.csv
	TaxMP_MPAv1_NewWF_KompostA.csv		Eukaryota	Viridiplantae	Streptophyta	Polypodiopsida	Polypodiales	Dryopteridaceae	Polystichum	Polystichum munitum	Unknown Subspecies	1	1		TaxMP_MPAv1_NewWF_KompostA.csv
	TaxMP_MPAv1_NewWF_KompostA.csv		Bacteria	Unknown Kingdom	Proteobacteria	Alphaproteobacteria	Rhizobiales	Phyllobacteriaceae	Mesorhizobium	Mesorhizobium loti	Mesorhizobium loti MAFF303099	1	1		TaxMP_MPAv1_NewWF_KompostA.csv
	TaxMP_MPAv1_NewWF_KompostA.csv		Bacteria	Unknown Kingdom	Proteobacteria	Alphaproteobacteria	Rhodospirillales	Rhodospirillaceae	Magnetospirillum	Magnetospirillum magneticum	Magnetospirillum magneticum AMB-1	1	2		TaxMP_MPAv1_NewWF_KompostA.csv
	TaxMP_MPAv1_NewWF_KompostA.csv		Eukaryota	Fungi	Ascomycota	Eurotiomycetes	Unknown Order	Unknown Family	Unknown Genus	Unknown Species	Unknown Subspecies	2	3		TaxMP_MPAv1_NewWF_KompostA.csv
	TaxMP_MPAv1_NewWF_KompostA.csv		Bacteria	Unknown Kingdom	Proteobacteria	Alphaproteobacteria	Rhodospirillales	Rhodospirillaceae	Rhodospirillum	Rhodospirillum rubrum	Rhodospirillum rubrum ATCC 11170	1	2		TaxMP_MPAv1_NewWF_KompostA.csv
	TaxMP_MPAv1_NewWF_KompostA.csv		Eukaryota	Metazoa	Chordata	Mammalia	Unknown Order	Unknown Family	Unknown Genus	Unknown Species	Unknown Subspecies	4	5		TaxMP_MPAv1_NewWF_KompostA.csv
	TaxMP_MPAv1_NewWF_KompostA.csv		Bacteria	Unknown Kingdom	Actinobacteria	Actinobacteria	Actinomycetales	Mycobacteriaceae	Mycobacterium	Unknown Species	Unknown Subspecies	2	3		TaxMP_MPAv1_NewWF_KompostA.csv
	TaxMP_MPAv1_NewWF_KompostA.csv		Bacteria	Unknown Kingdom	Proteobacteria	Alphaproteobacteria	Rhizobiales	Unknown Family	Unknown Genus	Unknown Species	Unknown Subspecies	1	1		TaxMP_MPAv1_NewWF_KompostA.csv
	TaxMP_MPAv1_NewWF_KompostA.csv		Bacteria	Unknown Kingdom	Actinobacteria	Actinobacteria	Actinomycetales	Propionibacteriaceae	Propionibacterium	Propionibacterium acnes	Propionibacterium acnes KPA171202	1	1		TaxMP_MPAv1_NewWF_KompostA.csv
	TaxMP_MPAv1_NewWF_KompostA.csv		Bacteria	Unknown Kingdom	Proteobacteria	Alphaproteobacteria	Rhizobiales	Xanthobacteraceae	Azorhizobium	Azorhizobium caulinodans	Azorhizobium caulinodans ORS 571	1	1		TaxMP_MPAv1_NewWF_KompostA.csv
	TaxMP_MPAv1_NewWF_KompostA.csv		Bacteria	Unknown Kingdom	Firmicutes	Bacilli	Bacillales	Bacillaceae	Bacillus	Unknown Species	Unknown Subspecies	1	1		TaxMP_MPAv1_NewWF_KompostA.csv
	TaxMP_MPAv1_NewWF_KompostA.csv		Bacteria	Unknown Kingdom	Proteobacteria	Gammaproteobacteria	Enterobacteriales	Enterobacteriaceae	Serratia	Serratia odorifera	Unknown Subspecies	1	2		TaxMP_MPAv1_NewWF_KompostA.csv
	TaxMP_MPAv1_NewWF_KompostA.csv		Bacteria	Unknown Kingdom	Bacteroidetes	Flavobacteriia	Flavobacteriales	Flavobacteriaceae	Flavobacterium	Flavobacterium johnsoniae	Flavobacterium johnsoniae UW101	1	1		TaxMP_MPAv1_NewWF_KompostA.csv
	TaxMP_MPAv1_NewWF_KompostA.csv		Bacteria	Unknown Kingdom	Proteobacteria	Alphaproteobacteria	Rhizobiales	Brucellaceae	Brucella	Brucella canis	Brucella canis ATCC 23365	1	1		TaxMP_MPAv1_NewWF_KompostA.csv
	TaxMP_MPAv1_NewWF_KompostA.csv		Bacteria	Unknown Kingdom	Proteobacteria	Alphaproteobacteria	Rhodobacterales	Rhodobacteraceae	Dinoroseobacter	Dinoroseobacter shibae	Dinoroseobacter shibae DFL 12	1	1		TaxMP_MPAv1_NewWF_KompostA.csv
	TaxMP_MPAv1_NewWF_KompostA.csv		Bacteria	Unknown Kingdom	Proteobacteria	Alphaproteobacteria	Rhizobiales	Rhizobiaceae	Agrobacterium	Agrobacterium vitis	Unknown Subspecies	1	1		TaxMP_MPAv1_NewWF_KompostA.csv
	TaxMP_MPAv1_NewWF_KompostA.csv		Bacteria	Unknown Kingdom	Proteobacteria	Alphaproteobacteria	Rhodobacterales	Rhodobacteraceae	Unknown Genus	Unknown Species	Unknown Subspecies	4	9		TaxMP_MPAv1_NewWF_KompostA.csv
	TaxMP_MPAv1_NewWF_KompostA.csv		Bacteria	Unknown Kingdom	Actinobacteria	Actinobacteria	Actinomycetales	Unknown Family	Unknown Genus	Unknown Species	Unknown Subspecies	1	2		TaxMP_MPAv1_NewWF_KompostA.csv
	TaxMP_MPAv1_NewWF_KompostA.csv		Eukaryota	Fungi	Ascomycota	Saccharomycetes	Saccharomycetales	Unknown Family	Candida	Candida albicans	Candida albicans SC5314	1	1		TaxMP_MPAv1_NewWF_KompostA.csv
	TaxMP_MPAv1_NewWF_KompostA.csv		Eukaryota	Fungi	Ascomycota	Eurotiomycetes	Eurotiales	Trichocomaceae	Emericella	Emericella nidulans	Aspergillus nidulans FGSC A4	1	2		TaxMP_MPAv1_NewWF_KompostA.csv
	TaxMP_MPAv1_NewWF_KompostA.csv		Eukaryota	Metazoa	Chordata	Mammalia	Primates	Hominidae	Pan	Pan troglodytes	Unknown Subspecies	1	1		TaxMP_MPAv1_NewWF_KompostA.csv
	TaxMP_MPAv1_NewWF_KompostB.csv		Bacteria	Unknown Kingdom	Bacteroidetes	Bacteroidia	Bacteroidales	Bacteroidaceae	Bacteroides	Bacteroides vulgatus	Bacteroides vulgatus ATCC 8482	1	1		TaxMP_MPAv1_NewWF_KompostB.csv
	TaxMP_MPAv1_NewWF_KompostB.csv		Unknown Superkingdom	Unknown Kingdom	Unknown Phylum	Unknown Class	Unknown Order	Unknown Family	Unknown Genus	Unknown Species	Unknown Subspecies	33	26		TaxMP_MPAv1_NewWF_KompostB.csv
	TaxMP_MPAv1_NewWF_KompostB.csv		Bacteria	Unknown Kingdom	Unknown Phylum	Unknown Class	Unknown Order	Unknown Family	Unknown Genus	Unknown Species	Unknown Subspecies	24	24		TaxMP_MPAv1_NewWF_KompostB.csv
	TaxMP_MPAv1_NewWF_KompostB.csv		Bacteria	Unknown Kingdom	Actinobacteria	Actinobacteria	Actinomycetales	Mycobacteriaceae	Mycobacterium	Mycobacterium tuberculosis	Mycobacterium tuberculosis CDC1551	1	1		TaxMP_MPAv1_NewWF_KompostB.csv
	TaxMP_MPAv1_NewWF_KompostB.csv		Eukaryota	Fungi	Ascomycota	Sordariomycetes	Sordariales	Sordariaceae	Neurospora	Neurospora crassa	Neurospora crassa OR74A	1	1		TaxMP_MPAv1_NewWF_KompostB.csv
	TaxMP_MPAv1_NewWF_KompostB.csv		Bacteria	Unknown Kingdom	Proteobacteria	Gammaproteobacteria	Enterobacteriales	Enterobacteriaceae	Escherichia	Escherichia coli	Escherichia coli K-12	1	2		TaxMP_MPAv1_NewWF_KompostB.csv
	TaxMP_MPAv1_NewWF_KompostB.csv		Bacteria	Unknown Kingdom	Proteobacteria	Gammaproteobacteria	Alteromonadales	Shewanellaceae	Shewanella	Shewanella sp. W3-18-1	Unknown Subspecies	1	1		TaxMP_MPAv1_NewWF_KompostB.csv
	TaxMP_MPAv1_NewWF_KompostB.csv		Eukaryota	Metazoa	Chordata	Mammalia	Rodentia	Unknown Family	Unknown Genus	Unknown Species	Unknown Subspecies	1	1		TaxMP_MPAv1_NewWF_KompostB.csv
	TaxMP_MPAv1_NewWF_KompostB.csv		Eukaryota	Metazoa	Chordata	Mammalia	Primates	Hominidae	Homo	Homo sapiens	Unknown Subspecies	2	2		TaxMP_MPAv1_NewWF_KompostB.csv
	TaxMP_MPAv1_NewWF_KompostB.csv		Eukaryota	Fungi	Ascomycota	Schizosaccharomycetes	Schizosaccharomycetales	Schizosaccharomycetaceae	Schizosaccharomyces	Schizosaccharomyces pombe	Schizosaccharomyces pombe 972h-	1	1		TaxMP_MPAv1_NewWF_KompostB.csv
	TaxMP_MPAv1_NewWF_KompostB.csv		Bacteria	Unknown Kingdom	Proteobacteria	Betaproteobacteria	Burkholderiales	Burkholderiaceae	Burkholderia	Unknown Species	Unknown Subspecies	2	2		TaxMP_MPAv1_NewWF_KompostB.csv
	TaxMP_MPAv1_NewWF_KompostB.csv		Bacteria	Unknown Kingdom	Proteobacteria	Alphaproteobacteria	Rhodobacterales	Rhodobacteraceae	Paracoccus	Paracoccus denitrificans	Unknown Subspecies	1	1		TaxMP_MPAv1_NewWF_KompostB.csv
	TaxMP_MPAv1_NewWF_KompostB.csv		Bacteria	Unknown Kingdom	Proteobacteria	Alphaproteobacteria	Rhizobiales	Rhizobiaceae	Rhizobium	Rhizobium etli	Rhizobium etli CIAT 652	1	1		TaxMP_MPAv1_NewWF_KompostB.csv
	TaxMP_MPAv1_NewWF_KompostB.csv		Eukaryota	Metazoa	Chordata	Mammalia	Carnivora	Canidae	Canis	Canis lupus	Canis lupus familiaris	2	3		TaxMP_MPAv1_NewWF_KompostB.csv
	TaxMP_MPAv1_NewWF_KompostB.csv		Bacteria	Unknown Kingdom	Proteobacteria	Alphaproteobacteria	Caulobacterales	Caulobacteraceae	Caulobacter	Caulobacter sp. K31	Unknown Subspecies	1	1		TaxMP_MPAv1_NewWF_KompostB.csv
	TaxMP_MPAv1_NewWF_KompostB.csv		Eukaryota	Viridiplantae	Streptophyta	Unknown Class	Solanales	Solanaceae	Solanum	Solanum tuberosum	Unknown Subspecies	1	2		TaxMP_MPAv1_NewWF_KompostB.csv
	TaxMP_MPAv1_NewWF_KompostB.csv		Eukaryota	Fungi	Ascomycota	Eurotiomycetes	Eurotiales	Trichocomaceae	Unknown Genus	Unknown Species	Unknown Subspecies	1	2		TaxMP_MPAv1_NewWF_KompostB.csv
	TaxMP_MPAv1_NewWF_KompostB.csv		Eukaryota	Fungi	Ascomycota	Unknown Class	Unknown Order	Unknown Family	Unknown Genus	Unknown Species	Unknown Subspecies	5	6		TaxMP_MPAv1_NewWF_KompostB.csv
	TaxMP_MPAv1_NewWF_KompostB.csv		Bacteria	Unknown Kingdom	Firmicutes	Bacilli	Bacillales	Staphylococcaceae	Staphylococcus	Staphylococcus epidermidis	Staphylococcus epidermidis ATCC 12228	1	1		TaxMP_MPAv1_NewWF_KompostB.csv
	TaxMP_MPAv1_NewWF_KompostB.csv		Bacteria	Unknown Kingdom	Proteobacteria	Alphaproteobacteria	Rhizobiales	Bradyrhizobiaceae	Nitrobacter	Nitrobacter hamburgensis	Nitrobacter hamburgensis X14	1	2		TaxMP_MPAv1_NewWF_KompostB.csv
	TaxMP_MPAv1_NewWF_KompostB.csv		Eukaryota	Fungi	Ascomycota	Saccharomycetes	Saccharomycetales	Saccharomycetaceae	Unknown Genus	Unknown Species	Unknown Subspecies	1	3		TaxMP_MPAv1_NewWF_KompostB.csv
	TaxMP_MPAv1_NewWF_KompostB.csv		Eukaryota	Viridiplantae	Streptophyta	Coniferopsida	Coniferales	Pinaceae	Pseudotsuga	Pseudotsuga menziesii	Unknown Subspecies	1	1		TaxMP_MPAv1_NewWF_KompostB.csv
	TaxMP_MPAv1_NewWF_KompostB.csv		Bacteria	Unknown Kingdom	Proteobacteria	Gammaproteobacteria	Enterobacteriales	Enterobacteriaceae	Unknown Genus	Unknown Species	Unknown Subspecies	1	2		TaxMP_MPAv1_NewWF_KompostB.csv
	TaxMP_MPAv1_NewWF_KompostB.csv		Eukaryota	Fungi	Ascomycota	Sordariomycetes	Glomerellales	Glomerellaceae	Colletotrichum	Colletotrichum gloeosporioides	Unknown Subspecies	1	1		TaxMP_MPAv1_NewWF_KompostB.csv
	TaxMP_MPAv1_NewWF_KompostB.csv		Bacteria	Unknown Kingdom	Proteobacteria	Deltaproteobacteria	Desulfobacterales	Desulfobacteraceae	Desulfococcus	Desulfococcus oleovorans	Desulfococcus oleovorans Hxd3	1	1		TaxMP_MPAv1_NewWF_KompostB.csv
	TaxMP_MPAv1_NewWF_KompostB.csv		Bacteria	Unknown Kingdom	Proteobacteria	Alphaproteobacteria	Unknown Order	Unknown Family	Unknown Genus	Unknown Species	Unknown Subspecies	1	1		TaxMP_MPAv1_NewWF_KompostB.csv
	TaxMP_MPAv1_NewWF_KompostB.csv		Bacteria	Unknown Kingdom	Proteobacteria	Alphaproteobacteria	Caulobacterales	Caulobacteraceae	Caulobacter	Caulobacter vibrioides	Caulobacter crescentus CB15	1	1		TaxMP_MPAv1_NewWF_KompostB.csv
	TaxMP_MPAv1_NewWF_KompostB.csv		Bacteria	Unknown Kingdom	Proteobacteria	Betaproteobacteria	Nitrosomonadales	Nitrosomonadaceae	Nitrosomonas	Nitrosomonas europaea	Nitrosomonas europaea ATCC 19718	1	5		TaxMP_MPAv1_NewWF_KompostB.csv
	TaxMP_MPAv1_NewWF_KompostB.csv		Eukaryota	Unknown Kingdom	Apicomplexa	Aconoidasida	Haemosporida	Unknown Family	Plasmodium	Plasmodium berghei	Plasmodium berghei ANKA	1	1		TaxMP_MPAv1_NewWF_KompostB.csv
	TaxMP_MPAv1_NewWF_KompostB.csv		Bacteria	Unknown Kingdom	Proteobacteria	Alphaproteobacteria	Sphingomonadales	Sphingomonadaceae	Novosphingobium	Novosphingobium aromaticivorans	Novosphingobium aromaticivorans DSM 12444	1	1		TaxMP_MPAv1_NewWF_KompostB.csv
	TaxMP_MPAv1_NewWF_KompostB.csv		Eukaryota	Unknown Kingdom	Unknown Phylum	Unknown Class	Kinetoplastida	Trypanosomatidae	Trypanosoma	Trypanosoma brucei	Trypanosoma brucei brucei	1	1		TaxMP_MPAv1_NewWF_KompostB.csv
	TaxMP_MPAv1_NewWF_KompostB.csv		Eukaryota	Unknown Kingdom	Unknown Phylum	Unknown Class	Unknown Order	Unknown Family	Unknown Genus	Unknown Species	Unknown Subspecies	12	23		TaxMP_MPAv1_NewWF_KompostB.csv
	TaxMP_MPAv1_NewWF_KompostB.csv		Bacteria	Unknown Kingdom	Proteobacteria	Gammaproteobacteria	Pseudomonadales	Pseudomonadaceae	Pseudomonas	Pseudomonas aeruginosa	Pseudomonas aeruginosa PAO1	1	1		TaxMP_MPAv1_NewWF_KompostB.csv
	TaxMP_MPAv1_NewWF_KompostB.csv		Bacteria	Unknown Kingdom	Proteobacteria	Unknown Class	Unknown Order	Unknown Family	Unknown Genus	Unknown Species	Unknown Subspecies	8	8		TaxMP_MPAv1_NewWF_KompostB.csv
	TaxMP_MPAv1_NewWF_KompostB.csv		Bacteria	Unknown Kingdom	Proteobacteria	Alphaproteobacteria	Rhodobacterales	Rhodobacteraceae	Rhodobacter	Rhodobacter sphaeroides	Rhodobacter sphaeroides KD131	1	1		TaxMP_MPAv1_NewWF_KompostB.csv
	TaxMP_MPAv1_NewWF_KompostB.csv		Bacteria	Unknown Kingdom	Firmicutes	Clostridia	Clostridiales	Clostridiales Family XI. Incertae Sedis	Finegoldia	Finegoldia magna	Finegoldia magna ATCC 29328	1	1		TaxMP_MPAv1_NewWF_KompostB.csv
	TaxMP_MPAv1_NewWF_KompostB.csv		Eukaryota	Viridiplantae	Streptophyta	Unknown Class	Cucurbitales	Cucurbitaceae	Cucurbita	Cucurbita maxima	Unknown Subspecies	1	1		TaxMP_MPAv1_NewWF_KompostB.csv
	TaxMP_MPAv1_NewWF_KompostB.csv		Bacteria	Unknown Kingdom	Bacteroidetes	Unknown Class	Unknown Order	Unknown Family	Unknown Genus	Unknown Species	Unknown Subspecies	3	2		TaxMP_MPAv1_NewWF_KompostB.csv
	TaxMP_MPAv1_NewWF_KompostB.csv		Eukaryota	Fungi	Ascomycota	Eurotiomycetes	Eurotiales	Trichocomaceae	Penicillium	Penicillium citrinum	Unknown Subspecies	1	1		TaxMP_MPAv1_NewWF_KompostB.csv
	TaxMP_MPAv1_NewWF_KompostB.csv		Bacteria	Unknown Kingdom	Proteobacteria	Alphaproteobacteria	Rhizobiales	Phyllobacteriaceae	Mesorhizobium	Mesorhizobium loti	Mesorhizobium loti MAFF303099	2	2		TaxMP_MPAv1_NewWF_KompostB.csv
	TaxMP_MPAv1_NewWF_KompostB.csv		Eukaryota	Metazoa	Nematoda	Chromadorea	Rhabditida	Rhabditidae	Caenorhabditis	Caenorhabditis elegans	Unknown Subspecies	1	2		TaxMP_MPAv1_NewWF_KompostB.csv
	TaxMP_MPAv1_NewWF_KompostB.csv		Bacteria	Unknown Kingdom	Proteobacteria	Alphaproteobacteria	Rhodospirillales	Rhodospirillaceae	Rhodospirillum	Rhodospirillum rubrum	Rhodospirillum rubrum ATCC 11170	1	3		TaxMP_MPAv1_NewWF_KompostB.csv
	TaxMP_MPAv1_NewWF_KompostB.csv		Eukaryota	Metazoa	Chordata	Mammalia	Unknown Order	Unknown Family	Unknown Genus	Unknown Species	Unknown Subspecies	5	4		TaxMP_MPAv1_NewWF_KompostB.csv
	TaxMP_MPAv1_NewWF_KompostB.csv		Bacteria	Unknown Kingdom	Actinobacteria	Actinobacteria	Actinomycetales	Mycobacteriaceae	Mycobacterium	Unknown Species	Unknown Subspecies	1	2		TaxMP_MPAv1_NewWF_KompostB.csv
	TaxMP_MPAv1_NewWF_KompostB.csv		Bacteria	Unknown Kingdom	Proteobacteria	Alphaproteobacteria	Rhizobiales	Unknown Family	Unknown Genus	Unknown Species	Unknown Subspecies	1	2		TaxMP_MPAv1_NewWF_KompostB.csv
	TaxMP_MPAv1_NewWF_KompostB.csv		Bacteria	Unknown Kingdom	Actinobacteria	Actinobacteria	Actinomycetales	Propionibacteriaceae	Propionibacterium	Propionibacterium acnes	Propionibacterium acnes KPA171202	1	2		TaxMP_MPAv1_NewWF_KompostB.csv
	TaxMP_MPAv1_NewWF_KompostB.csv		Bacteria	Unknown Kingdom	Cyanobacteria	Unknown Class	Chroococcales	Unknown Family	Cyanothece	Cyanothece sp. PCC 7424	Unknown Subspecies	1	1		TaxMP_MPAv1_NewWF_KompostB.csv
	TaxMP_MPAv1_NewWF_KompostB.csv		Bacteria	Unknown Kingdom	Proteobacteria	Gammaproteobacteria	Enterobacteriales	Enterobacteriaceae	Yersinia	Unknown Species	Unknown Subspecies	2	1		TaxMP_MPAv1_NewWF_KompostB.csv
	TaxMP_MPAv1_NewWF_KompostB.csv		Bacteria	Unknown Kingdom	Actinobacteria	Actinobacteria	Actinomycetales	Unknown Family	Unknown Genus	Unknown Species	Unknown Subspecies	2	3		TaxMP_MPAv1_NewWF_KompostB.csv
	TaxMP_MPAv1_NewWF_KompostB.csv		Bacteria	Unknown Kingdom	Proteobacteria	Alphaproteobacteria	Rhodobacterales	Rhodobacteraceae	Unknown Genus	Unknown Species	Unknown Subspecies	1	1		TaxMP_MPAv1_NewWF_KompostB.csv
	TaxMP_MPAv1_NewWF_KompostB.csv		Eukaryota	Fungi	Ascomycota	Saccharomycetes	Saccharomycetales	Unknown Family	Candida	Candida albicans	Candida albicans SC5314	1	1		TaxMP_MPAv1_NewWF_KompostB.csv
	TaxMP_MPAv1_NewWF_KompostB.csv		Eukaryota	Fungi	Ascomycota	Eurotiomycetes	Eurotiales	Trichocomaceae	Aspergillus	Aspergillus fumigatus	Aspergillus fumigatus Af293	1	3		TaxMP_MPAv1_NewWF_KompostB.csv
	TaxMP_MPAv1_NewWF_KompostB.csv		Bacteria	Unknown Kingdom	Proteobacteria	Alphaproteobacteria	Sphingomonadales	Sphingomonadaceae	Sphingobium	Sphingobium yanoikuyae	Unknown Subspecies	1	1		TaxMP_MPAv1_NewWF_KompostB.csv
	TaxMP_MPAv1_NewWF_KompostB.csv		Eukaryota	Fungi	Ascomycota	Sordariomycetes	Diaporthales	Cryphonectriaceae	Cryphonectria	Cryphonectria parasitica	Unknown Subspecies	1	1		TaxMP_MPAv1_NewWF_KompostB.csv
	TaxMP_MPAv1_NewWF_KompostB.csv		Eukaryota	Metazoa	Mollusca	Gastropoda	Unknown Order	Planorbidae	Biomphalaria	Biomphalaria glabrata	Unknown Subspecies	1	1		TaxMP_MPAv1_NewWF_KompostB.csv
	TaxMP_MPAv1_NewWF_KompostB.csv		Eukaryota	Unknown Kingdom	Unknown Phylum	Bangiophyceae	Cyanidiales	Cyanidiaceae	Cyanidioschyzon	Cyanidioschyzon merolae	Cyanidioschyzon merolae strain 10D	1	1		TaxMP_MPAv1_NewWF_KompostB.csv
	TaxMP_MPAv1_NewWF_KompostC.csv		Unknown Superkingdom	Unknown Kingdom	Unknown Phylum	Unknown Class	Unknown Order	Unknown Family	Unknown Genus	Unknown Species	Unknown Subspecies	17	18		TaxMP_MPAv1_NewWF_KompostC.csv
	TaxMP_MPAv1_NewWF_KompostC.csv		Eukaryota	Metazoa	Chordata	Mammalia	Unknown Order	Unknown Family	Unknown Genus	Unknown Species	Unknown Subspecies	2	4		TaxMP_MPAv1_NewWF_KompostC.csv
	TaxMP_MPAv1_NewWF_KompostC.csv		Bacteria	Unknown Kingdom	Unknown Phylum	Unknown Class	Unknown Order	Unknown Family	Unknown Genus	Unknown Species	Unknown Subspecies	3	1		TaxMP_MPAv1_NewWF_KompostC.csv
	TaxMP_MPAv1_NewWF_KompostC.csv		Bacteria	Unknown Kingdom	Actinobacteria	Actinobacteria	Actinomycetales	Mycobacteriaceae	Mycobacterium	Unknown Species	Unknown Subspecies	1	2		TaxMP_MPAv1_NewWF_KompostC.csv
	TaxMP_MPAv1_NewWF_KompostC.csv		Bacteria	Unknown Kingdom	Proteobacteria	Alphaproteobacteria	Rhizobiales	Unknown Family	Unknown Genus	Unknown Species	Unknown Subspecies	2	2		TaxMP_MPAv1_NewWF_KompostC.csv
	TaxMP_MPAv1_NewWF_KompostC.csv		Bacteria	Unknown Kingdom	Proteobacteria	Alphaproteobacteria	Rhizobiales	Xanthobacteraceae	Xanthobacter	Xanthobacter autotrophicus	Xanthobacter autotrophicus Py2	1	1		TaxMP_MPAv1_NewWF_KompostC.csv
	TaxMP_MPAv1_NewWF_KompostC.csv		Eukaryota	Unknown Kingdom	Unknown Phylum	Unknown Class	Unknown Order	Unknown Family	Unknown Genus	Unknown Species	Unknown Subspecies	8	7		TaxMP_MPAv1_NewWF_KompostC.csv
	TaxMP_MPAv1_NewWF_KompostC.csv		Eukaryota	Fungi	Ascomycota	Schizosaccharomycetes	Schizosaccharomycetales	Schizosaccharomycetaceae	Schizosaccharomyces	Schizosaccharomyces pombe	Schizosaccharomyces pombe 972h-	1	2		TaxMP_MPAv1_NewWF_KompostC.csv
	TaxMP_MPAv1_NewWF_KompostC.csv		Bacteria	Unknown Kingdom	Proteobacteria	Unknown Class	Unknown Order	Unknown Family	Unknown Genus	Unknown Species	Unknown Subspecies	2	1		TaxMP_MPAv1_NewWF_KompostC.csv
	TaxMP_MPAv1_NewWF_KompostC.csv		Bacteria	Unknown Kingdom	Bacteroidetes	Flavobacteriia	Flavobacteriales	Flavobacteriaceae	Flavobacterium	Flavobacterium johnsoniae	Flavobacterium johnsoniae UW101	1	1		TaxMP_MPAv1_NewWF_KompostC.csv
	TaxMP_MPAv1_NewWF_KompostC.csv		Eukaryota	Viridiplantae	Streptophyta	Unknown Class	Fabales	Fabaceae	Pisum	Pisum sativum	Unknown Subspecies	1	1		TaxMP_MPAv1_NewWF_KompostC.csv
	TaxMP_MPAv1_NewWF_KompostC.csv		Bacteria	Unknown Kingdom	Firmicutes	Bacilli	Lactobacillales	Streptococcaceae	Streptococcus	Streptococcus agalactiae	Streptococcus agalactiae 2603V/R	1	1		TaxMP_MPAv1_NewWF_KompostC.csv
	TaxMP_MPAv1_NewWF_KompostC.csv		Eukaryota	Unknown Kingdom	Unknown Phylum	Unknown Class	Dictyosteliida	Unknown Family	Dictyostelium	Dictyostelium discoideum	Unknown Subspecies	2	2		TaxMP_MPAv1_NewWF_KompostC.csv
	TaxMP_MPAv1_NewWF_KompostC.csv		Bacteria	Unknown Kingdom	Proteobacteria	Gammaproteobacteria	Enterobacteriales	Enterobacteriaceae	Salmonella	Salmonella enterica subsp. enterica serovar Typhimurium str. LT2	Salmonella enterica subsp. enterica	1	1		TaxMP_MPAv1_NewWF_KompostC.csv
	TaxMP_MPAv1_NewWF_KompostC.csv		Bacteria	Unknown Kingdom	Proteobacteria	Alphaproteobacteria	Rhizobiales	Rhizobiaceae	Rhizobium	Rhizobium leguminosarum	Rhizobium leguminosarum bv. viciae 3841	1	2		TaxMP_MPAv1_NewWF_KompostC.csv
	TaxMP_MPAv1_NewWF_KompostC.csv		Bacteria	Unknown Kingdom	Proteobacteria	Betaproteobacteria	Unknown Order	Unknown Family	Unknown Genus	Unknown Species	Unknown Subspecies	2	2		TaxMP_MPAv1_NewWF_KompostC.csv
	TaxMP_MPAv1_NewWF_KompostC.csv		Eukaryota	Fungi	Ascomycota	Eurotiomycetes	Eurotiales	Trichocomaceae	Aspergillus	Aspergillus fumigatus	Aspergillus fumigatus Af293	2	3		TaxMP_MPAv1_NewWF_KompostC.csv
	TaxMP_MPAv1_NewWF_KompostC.csv		Eukaryota	Fungi	Ascomycota	Unknown Class	Unknown Order	Unknown Family	Unknown Genus	Unknown Species	Unknown Subspecies	1	2		TaxMP_MPAv1_NewWF_KompostC.csv
	TaxMP_MPAv1_NewWF_KompostC.csv		Eukaryota	Metazoa	Arthropoda	Insecta	Diptera	Drosophilidae	Drosophila	Drosophila melanogaster	Unknown Subspecies	1	1		TaxMP_MPAv1_NewWF_KompostC.csv
	TaxMP_MPAv1_NewWF_KompostC.csv		Eukaryota	Fungi	Ascomycota	Eurotiomycetes	Onygenales	Unknown Family	Paracoccidioides	Paracoccidioides sp. 'lutzii'	Paracoccidioides sp. 'lutzii' Pb01	1	1		TaxMP_MPAv1_NewWF_KompostC.csv
	TaxMP_MPAv1_NewWF_Soil_A.csv		Unknown Superkingdom	Unknown Kingdom	Unknown Phylum	Unknown Class	Unknown Order	Unknown Family	Unknown Genus	Unknown Species	Unknown Subspecies	14	19		TaxMP_MPAv1_NewWF_Soil_A.csv
	TaxMP_MPAv1_NewWF_Soil_A.csv		Eukaryota	Viridiplantae	Streptophyta	Liliopsida	Poales	Poaceae	Hordeum	Hordeum vulgare	Unknown Subspecies	1	1		TaxMP_MPAv1_NewWF_Soil_A.csv
	TaxMP_MPAv1_NewWF_Soil_A.csv		Eukaryota	Metazoa	Chordata	Mammalia	Unknown Order	Unknown Family	Unknown Genus	Unknown Species	Unknown Subspecies	11	19		TaxMP_MPAv1_NewWF_Soil_A.csv
	TaxMP_MPAv1_NewWF_Soil_A.csv		Bacteria	Unknown Kingdom	Unknown Phylum	Unknown Class	Unknown Order	Unknown Family	Unknown Genus	Unknown Species	Unknown Subspecies	4	3		TaxMP_MPAv1_NewWF_Soil_A.csv
	TaxMP_MPAv1_NewWF_Soil_A.csv		Bacteria	Unknown Kingdom	Proteobacteria	Alphaproteobacteria	Rickettsiales	Rickettsiaceae	Rickettsia	Rickettsia felis	Rickettsia felis URRWXCal2	1	1		TaxMP_MPAv1_NewWF_Soil_A.csv
	TaxMP_MPAv1_NewWF_Soil_A.csv		Archaea	Unknown Kingdom	Crenarchaeota	Thermoprotei	Sulfolobales	Sulfolobaceae	Sulfolobus	Sulfolobus solfataricus	Sulfolobus solfataricus P2	1	1		TaxMP_MPAv1_NewWF_Soil_A.csv
	TaxMP_MPAv1_NewWF_Soil_A.csv		Eukaryota	Metazoa	Chordata	Mammalia	Primates	Hominidae	Homo	Homo sapiens	Unknown Subspecies	3	4		TaxMP_MPAv1_NewWF_Soil_A.csv
	TaxMP_MPAv1_NewWF_Soil_A.csv		Bacteria	Unknown Kingdom	Proteobacteria	Alphaproteobacteria	Rhizobiales	Xanthobacteraceae	Azorhizobium	Azorhizobium caulinodans	Azorhizobium caulinodans ORS 571	1	1		TaxMP_MPAv1_NewWF_Soil_A.csv
	TaxMP_MPAv1_NewWF_Soil_A.csv		Bacteria	Unknown Kingdom	Firmicutes	Bacilli	Bacillales	Staphylococcaceae	Staphylococcus	Staphylococcus aureus subsp. aureus Mu3	Staphylococcus aureus subsp. aureus	1	1		TaxMP_MPAv1_NewWF_Soil_A.csv
	TaxMP_MPAv1_NewWF_Soil_A.csv		Bacteria	Unknown Kingdom	Proteobacteria	Epsilonproteobacteria	Campylobacterales	Campylobacteraceae	Campylobacter	Campylobacter lari	Campylobacter lari RM2100	1	1		TaxMP_MPAv1_NewWF_Soil_A.csv
	TaxMP_MPAv1_NewWF_Soil_A.csv		Bacteria	Unknown Kingdom	Spirochaetes	Spirochaetia	Spirochaetales	Leptospiraceae	Leptospira	Leptospira interrogans	Leptospira interrogans serovar Copenhageni str. Fiocruz L1-130	1	2		TaxMP_MPAv1_NewWF_Soil_A.csv
	TaxMP_MPAv1_NewWF_Soil_A.csv		Bacteria	Unknown Kingdom	Proteobacteria	Alphaproteobacteria	Caulobacterales	Caulobacteraceae	Caulobacter	Caulobacter vibrioides	Caulobacter crescentus CB15	1	2		TaxMP_MPAv1_NewWF_Soil_A.csv
	TaxMP_MPAv1_NewWF_Soil_A.csv		Eukaryota	Metazoa	Nematoda	Chromadorea	Rhabditida	Rhabditidae	Caenorhabditis	Caenorhabditis elegans	Unknown Subspecies	1	1		TaxMP_MPAv1_NewWF_Soil_A.csv
	TaxMP_MPAv1_NewWF_Soil_A.csv		Eukaryota	Unknown Kingdom	Apicomplexa	Aconoidasida	Haemosporida	Unknown Family	Plasmodium	Plasmodium berghei	Plasmodium berghei ANKA	1	1		TaxMP_MPAv1_NewWF_Soil_A.csv
	TaxMP_MPAv1_NewWF_Soil_B.csv		Viruses	Unknown Kingdom	Unknown Phylum	Unknown Class	Unknown Order	Mimiviridae	Mimivirus	Acanthamoeba polyphaga mimivirus	Unknown Subspecies	1	3		TaxMP_MPAv1_NewWF_Soil_B.csv
	TaxMP_MPAv1_NewWF_Soil_B.csv		Bacteria	Unknown Kingdom	Actinobacteria	Actinobacteria	Actinomycetales	Nocardioidaceae	Nocardioides	Nocardioides sp. JS614	Unknown Subspecies	1	1		TaxMP_MPAv1_NewWF_Soil_B.csv
	TaxMP_MPAv1_NewWF_Soil_B.csv		Unknown Superkingdom	Unknown Kingdom	Unknown Phylum	Unknown Class	Unknown Order	Unknown Family	Unknown Genus	Unknown Species	Unknown Subspecies	22	23		TaxMP_MPAv1_NewWF_Soil_B.csv
	TaxMP_MPAv1_NewWF_Soil_B.csv		Bacteria	Unknown Kingdom	Unknown Phylum	Unknown Class	Unknown Order	Unknown Family	Unknown Genus	Unknown Species	Unknown Subspecies	3	2		TaxMP_MPAv1_NewWF_Soil_B.csv
	TaxMP_MPAv1_NewWF_Soil_B.csv		Eukaryota	Metazoa	Chordata	Mammalia	Rodentia	Muridae	Rattus	Rattus norvegicus	Unknown Subspecies	1	1		TaxMP_MPAv1_NewWF_Soil_B.csv
	TaxMP_MPAv1_NewWF_Soil_B.csv		Eukaryota	Metazoa	Chordata	Mammalia	Primates	Hominidae	Homo	Homo sapiens	Unknown Subspecies	6	8		TaxMP_MPAv1_NewWF_Soil_B.csv
	TaxMP_MPAv1_NewWF_Soil_B.csv		Eukaryota	Unknown Kingdom	Unknown Phylum	Unknown Class	Unknown Order	Unknown Family	Unknown Genus	Unknown Species	Unknown Subspecies	1	5		TaxMP_MPAv1_NewWF_Soil_B.csv
	TaxMP_MPAv1_NewWF_Soil_B.csv		Bacteria	Unknown Kingdom	Proteobacteria	Unknown Class	Unknown Order	Unknown Family	Unknown Genus	Unknown Species	Unknown Subspecies	4	4		TaxMP_MPAv1_NewWF_Soil_B.csv
	TaxMP_MPAv1_NewWF_Soil_B.csv		Bacteria	Unknown Kingdom	Proteobacteria	Alphaproteobacteria	Rhodobacterales	Rhodobacteraceae	Paracoccus	Paracoccus denitrificans	Unknown Subspecies	1	1		TaxMP_MPAv1_NewWF_Soil_B.csv
	TaxMP_MPAv1_NewWF_Soil_B.csv		Bacteria	Unknown Kingdom	Proteobacteria	Betaproteobacteria	Rhodocyclales	Rhodocyclaceae	Azoarcus	Azoarcus sp. BH72	Unknown Subspecies	1	1		TaxMP_MPAv1_NewWF_Soil_B.csv
	TaxMP_MPAv1_NewWF_Soil_B.csv		Bacteria	Unknown Kingdom	Proteobacteria	Alphaproteobacteria	Rhizobiales	Rhizobiaceae	Rhizobium	Rhizobium leguminosarum	Rhizobium leguminosarum bv. viciae 3841	1	1		TaxMP_MPAv1_NewWF_Soil_B.csv
	TaxMP_MPAv1_NewWF_Soil_B.csv		Bacteria	Unknown Kingdom	Firmicutes	Clostridia	Clostridiales	Clostridiaceae	Clostridium	Clostridium botulinum	Clostridium botulinum E3 str. Alaska E43	1	1		TaxMP_MPAv1_NewWF_Soil_B.csv
	TaxMP_MPAv1_NewWF_Soil_B.csv		Bacteria	Unknown Kingdom	Proteobacteria	Deltaproteobacteria	Myxococcales	Myxococcaceae	Anaeromyxobacter	Anaeromyxobacter dehalogenans	Anaeromyxobacter dehalogenans 2CP-C	1	1		TaxMP_MPAv1_NewWF_Soil_B.csv
	TaxMP_MPAv1_NewWF_Soil_B.csv		Bacteria	Unknown Kingdom	Actinobacteria	Actinobacteria	Actinomycetales	Micrococcaceae	Arthrobacter	Arthrobacter sp. FB24	Unknown Subspecies	1	1		TaxMP_MPAv1_NewWF_Soil_B.csv
	TaxMP_MPAv1_NewWF_Soil_B.csv		Bacteria	Unknown Kingdom	Cyanobacteria	Unknown Class	Chroococcales	Unknown Family	Unknown Genus	Unknown Species	Unknown Subspecies	2	1		TaxMP_MPAv1_NewWF_Soil_B.csv
	TaxMP_MPAv1_NewWF_Soil_B.csv		Eukaryota	Metazoa	Chordata	Mammalia	Unknown Order	Unknown Family	Unknown Genus	Unknown Species	Unknown Subspecies	3	5		TaxMP_MPAv1_NewWF_Soil_B.csv
	TaxMP_MPAv1_NewWF_Soil_B.csv		Bacteria	Unknown Kingdom	Spirochaetes	Spirochaetia	Spirochaetales	Leptospiraceae	Leptospira	Leptospira biflexa	Leptospira biflexa serovar Patoc strain 'Patoc 1 (Paris)'	1	1		TaxMP_MPAv1_NewWF_Soil_B.csv
	TaxMP_MPAv1_NewWF_Soil_B.csv		Eukaryota	Viridiplantae	Chlorophyta	Trebouxiophyceae	Chlorellales	Chlorellaceae	Prototheca	Prototheca wickerhamii	Unknown Subspecies	1	1		TaxMP_MPAv1_NewWF_Soil_B.csv
	TaxMP_MPAv1_NewWF_Soil_B.csv		Bacteria	Unknown Kingdom	Actinobacteria	Actinobacteria	Actinomycetales	Streptomycetaceae	Streptomyces	Streptomyces albus	Streptomyces albus G	1	1		TaxMP_MPAv1_NewWF_Soil_B.csv
	TaxMP_MPAv1_NewWF_Soil_B.csv		Bacteria	Unknown Kingdom	Proteobacteria	Epsilonproteobacteria	Campylobacterales	Campylobacteraceae	Campylobacter	Campylobacter jejuni subsp. jejuni 81116	Campylobacter jejuni subsp. jejuni	1	1		TaxMP_MPAv1_NewWF_Soil_B.csv
	TaxMP_MPAv1_NewWF_Soil_B.csv		Bacteria	Unknown Kingdom	Proteobacteria	Alphaproteobacteria	Unknown Order	Unknown Family	Unknown Genus	Unknown Species	Unknown Subspecies	2	4		TaxMP_MPAv1_NewWF_Soil_B.csv
	TaxMP_MPAv1_NewWF_Soil_B.csv		Bacteria	Unknown Kingdom	Actinobacteria	Actinobacteria	Actinomycetales	Unknown Family	Unknown Genus	Unknown Species	Unknown Subspecies	1	2		TaxMP_MPAv1_NewWF_Soil_B.csv
	TaxMP_MPAv1_NewWF_Soil_B.csv		Eukaryota	Metazoa	Unknown Phylum	Unknown Class	Unknown Order	Unknown Family	Unknown Genus	Unknown Species	Unknown Subspecies	2	4		TaxMP_MPAv1_NewWF_Soil_B.csv
	TaxMP_MPAv1_NewWF_Soil_B.csv		Bacteria	Unknown Kingdom	Actinobacteria	Actinobacteria	Actinomycetales	Kineosporiaceae	Kineococcus	Kineococcus radiotolerans	Kineococcus radiotolerans SRS30216	1	1		TaxMP_MPAv1_NewWF_Soil_B.csv
	TaxMP_MPAv1_NewWF_Soil_B.csv		Bacteria	Unknown Kingdom	Proteobacteria	Alphaproteobacteria	Caulobacterales	Caulobacteraceae	Caulobacter	Caulobacter vibrioides	Caulobacter crescentus CB15	1	1		TaxMP_MPAv1_NewWF_Soil_B.csv
	TaxMP_MPAv1_NewWF_Soil_B.csv		Eukaryota	Viridiplantae	Streptophyta	Liliopsida	Asparagales	Hyacinthaceae	Ornithogalum	Ornithogalum longebracteatum	Unknown Subspecies	1	1		TaxMP_MPAv1_NewWF_Soil_B.csv
	TaxMP_MPAv1_NewWF_Soil_C.csv		Unknown Superkingdom	Unknown Kingdom	Unknown Phylum	Unknown Class	Unknown Order	Unknown Family	Unknown Genus	Unknown Species	Unknown Subspecies	11	9		TaxMP_MPAv1_NewWF_Soil_C.csv
	TaxMP_MPAv1_NewWF_Soil_C.csv		Bacteria	Unknown Kingdom	Unknown Phylum	Unknown Class	Unknown Order	Unknown Family	Unknown Genus	Unknown Species	Unknown Subspecies	1	3		TaxMP_MPAv1_NewWF_Soil_C.csv
	TaxMP_MPAv1_NewWF_Soil_C.csv		Eukaryota	Metazoa	Chordata	Mammalia	Unknown Order	Unknown Family	Unknown Genus	Unknown Species	Unknown Subspecies	5	7		TaxMP_MPAv1_NewWF_Soil_C.csv
	TaxMP_MPAv1_NewWF_Soil_C.csv		Eukaryota	Metazoa	Mollusca	Gastropoda	Unknown Order	Aplysiidae	Aplysia	Aplysia californica	Unknown Subspecies	1	1		TaxMP_MPAv1_NewWF_Soil_C.csv
	TaxMP_MPAv1_NewWF_Soil_C.csv		Eukaryota	Metazoa	Chordata	Mammalia	Primates	Hominidae	Homo	Homo sapiens	Unknown Subspecies	3	3		TaxMP_MPAv1_NewWF_Soil_C.csv
	TaxMP_MPAv1_NewWF_Soil_C.csv		Eukaryota	Viridiplantae	Streptophyta	Unknown Class	Brassicales	Brassicaceae	Arabidopsis	Arabidopsis thaliana	Unknown Subspecies	2	2		TaxMP_MPAv1_NewWF_Soil_C.csv
	TaxMP_MPAv1_NewWF_Soil_C.csv		Eukaryota	Unknown Kingdom	Unknown Phylum	Unknown Class	Unknown Order	Unknown Family	Unknown Genus	Unknown Species	Unknown Subspecies	2	2		TaxMP_MPAv1_NewWF_Soil_C.csv
	TaxMP_MPAv1_NewWF_Soil_C.csv		Bacteria	Unknown Kingdom	Proteobacteria	Unknown Class	Unknown Order	Unknown Family	Unknown Genus	Unknown Species	Unknown Subspecies	2	1		TaxMP_MPAv1_NewWF_Soil_C.csv
	TaxMP_MPAv1_NewWF_Soil_C.csv		Viruses	Unknown Kingdom	Unknown Phylum	Unknown Class	Unknown Order	Potyviridae	Potyvirus	Pea seed-borne mosaic virus	Pea seed-borne mosaic virus (strain DPD1)	1	1		TaxMP_MPAv1_NewWF_Soil_C.csv
	TaxMP_MPAv1_NewWF_Soil_C.csv		Eukaryota	Unknown Kingdom	Apicomplexa	Aconoidasida	Haemosporida	Unknown Family	Plasmodium	Plasmodium falciparum	Plasmodium falciparum 3D7	1	1		TaxMP_MPAv1_NewWF_Soil_C.csv
	TaxMP_MPAv1_NewWF_Soil_C.csv		Eukaryota	Metazoa	Chordata	Mammalia	Rodentia	Muridae	Mus	Mus musculus	Unknown Subspecies	2	2		TaxMP_MPAv1_NewWF_Soil_C.csv
	TaxMP_MPAv1_NewWF_Soil_C.csv		Eukaryota	Metazoa	Nematoda	Chromadorea	Rhabditida	Rhabditidae	Caenorhabditis	Caenorhabditis elegans	Unknown Subspecies	2	2		TaxMP_MPAv1_NewWF_Soil_C.csv
	TaxMP_MPAv1_NewWF_WWTP_A.csv		Eukaryota	Unknown Kingdom	Unknown Phylum	Oligohymenophorea	Peniculida	Parameciidae	Paramecium	Paramecium tetraurelia	Unknown Subspecies	1	1		TaxMP_MPAv1_NewWF_WWTP_A.csv
	TaxMP_MPAv1_NewWF_WWTP_A.csv		Unknown Superkingdom	Unknown Kingdom	Unknown Phylum	Unknown Class	Unknown Order	Unknown Family	Unknown Genus	Unknown Species	Unknown Subspecies	266	359		TaxMP_MPAv1_NewWF_WWTP_A.csv
	TaxMP_MPAv1_NewWF_WWTP_A.csv		Eukaryota	Metazoa	Chordata	Mammalia	Unknown Order	Unknown Family	Unknown Genus	Unknown Species	Unknown Subspecies	5	6		TaxMP_MPAv1_NewWF_WWTP_A.csv
	TaxMP_MPAv1_NewWF_WWTP_A.csv		Bacteria	Unknown Kingdom	Unknown Phylum	Unknown Class	Unknown Order	Unknown Family	Unknown Genus	Unknown Species	Unknown Subspecies	1	3		TaxMP_MPAv1_NewWF_WWTP_A.csv
	TaxMP_MPAv1_NewWF_WWTP_A.csv		Bacteria	Unknown Kingdom	Proteobacteria	Gammaproteobacteria	Enterobacteriales	Enterobacteriaceae	Escherichia	Escherichia coli	Escherichia coli S88	1	1		TaxMP_MPAv1_NewWF_WWTP_A.csv
	TaxMP_MPAv1_NewWF_WWTP_A.csv		Bacteria	Unknown Kingdom	Actinobacteria	Actinobacteria	Actinomycetales	Mycobacteriaceae	Mycobacterium	Unknown Species	Unknown Subspecies	1	2		TaxMP_MPAv1_NewWF_WWTP_A.csv
	TaxMP_MPAv1_NewWF_WWTP_A.csv		Eukaryota	Metazoa	Chordata	Mammalia	Primates	Hominidae	Unknown Genus	Unknown Species	Unknown Subspecies	3	4		TaxMP_MPAv1_NewWF_WWTP_A.csv
	TaxMP_MPAv1_NewWF_WWTP_A.csv		Bacteria	Unknown Kingdom	Proteobacteria	Alphaproteobacteria	Rhizobiales	Unknown Family	Unknown Genus	Unknown Species	Unknown Subspecies	2	1		TaxMP_MPAv1_NewWF_WWTP_A.csv
	TaxMP_MPAv1_NewWF_WWTP_A.csv		Eukaryota	Metazoa	Chordata	Mammalia	Primates	Hominidae	Homo	Homo sapiens	Unknown Subspecies	22	46		TaxMP_MPAv1_NewWF_WWTP_A.csv
	TaxMP_MPAv1_NewWF_WWTP_A.csv		Eukaryota	Unknown Kingdom	Unknown Phylum	Unknown Class	Unknown Order	Unknown Family	Unknown Genus	Unknown Species	Unknown Subspecies	3	8		TaxMP_MPAv1_NewWF_WWTP_A.csv
	TaxMP_MPAv1_NewWF_WWTP_A.csv		Bacteria	Unknown Kingdom	Cyanobacteria	Unknown Class	Nostocales	Nostocaceae	Anabaena	Anabaena variabilis	Anabaena variabilis ATCC 29413	1	1		TaxMP_MPAv1_NewWF_WWTP_A.csv
	TaxMP_MPAv1_NewWF_WWTP_A.csv		Bacteria	Unknown Kingdom	Proteobacteria	Betaproteobacteria	Burkholderiales	Unknown Family	Unknown Genus	Unknown Species	Unknown Subspecies	1	2		TaxMP_MPAv1_NewWF_WWTP_A.csv
	TaxMP_MPAv1_NewWF_WWTP_A.csv		Eukaryota	Metazoa	Chordata	Mammalia	Rodentia	Muridae	Mus	Mus musculus	Unknown Subspecies	1	1		TaxMP_MPAv1_NewWF_WWTP_A.csv
	TaxMP_MPAv1_NewWF_WWTP_A.csv		Eukaryota	Metazoa	Chordata	Mammalia	Carnivora	Canidae	Canis	Canis lupus	Canis lupus familiaris	1	1		TaxMP_MPAv1_NewWF_WWTP_A.csv
	TaxMP_MPAv1_NewWF_WWTP_A.csv		Eukaryota	Viridiplantae	Streptophyta	Unknown Class	Solanales	Solanaceae	Solanum	Solanum tuberosum	Unknown Subspecies	1	1		TaxMP_MPAv1_NewWF_WWTP_A.csv
	TaxMP_MPAv1_NewWF_WWTP_A.csv		Bacteria	Unknown Kingdom	Proteobacteria	Alphaproteobacteria	Unknown Order	Unknown Family	Unknown Genus	Unknown Species	Unknown Subspecies	2	1		TaxMP_MPAv1_NewWF_WWTP_A.csv
	TaxMP_MPAv1_NewWF_WWTP_A.csv		Bacteria	Unknown Kingdom	Proteobacteria	Betaproteobacteria	Methylophilales	Methylophilaceae	Methylobacillus	Methylobacillus flagellatus	Methylobacillus flagellatus KT	1	2		TaxMP_MPAv1_NewWF_WWTP_A.csv
	TaxMP_MPAv1_NewWF_WWTP_A.csv		Bacteria	Unknown Kingdom	Proteobacteria	Gammaproteobacteria	Xanthomonadales	Xanthomonadaceae	Xanthomonas	Xanthomonas citri	Xanthomonas axonopodis pv. citri str. 306	1	1		TaxMP_MPAv1_NewWF_WWTP_A.csv
	TaxMP_MPAv1_NewWF_WWTP_A.csv		Eukaryota	Metazoa	Chordata	Mammalia	Unknown Order	Bovidae	Bos	Bos taurus	Unknown Subspecies	1	2		TaxMP_MPAv1_NewWF_WWTP_A.csv
	TaxMP_MPAv1_NewWF_WWTP_A.csv		Bacteria	Unknown Kingdom	Actinobacteria	Actinobacteria	Actinomycetales	Frankiaceae	Frankia	Frankia alni	Frankia alni ACN14a	1	1		TaxMP_MPAv1_NewWF_WWTP_A.csv
	TaxMP_MPAv1_NewWF_WWTP_A.csv		Bacteria	Unknown Kingdom	Firmicutes	Clostridia	Clostridiales	Clostridiaceae	Clostridium	Clostridium perfringens	Clostridium perfringens str. 13	1	1		TaxMP_MPAv1_NewWF_WWTP_A.csv
	TaxMP_MPAv1_NewWF_WWTP_A.csv		Bacteria	Unknown Kingdom	Proteobacteria	Betaproteobacteria	Burkholderiales	Comamonadaceae	Acidovorax	Acidovorax citrulli	Acidovorax citrulli AAC00-1	1	1		TaxMP_MPAv1_NewWF_WWTP_A.csv
	TaxMP_MPAv1_NewWF_WWTP_B.csv		Unknown Superkingdom	Unknown Kingdom	Unknown Phylum	Unknown Class	Unknown Order	Unknown Family	Unknown Genus	Unknown Species	Unknown Subspecies	145	188		TaxMP_MPAv1_NewWF_WWTP_B.csv
	TaxMP_MPAv1_NewWF_WWTP_B.csv		Bacteria	Unknown Kingdom	Unknown Phylum	Unknown Class	Unknown Order	Unknown Family	Unknown Genus	Unknown Species	Unknown Subspecies	2	2		TaxMP_MPAv1_NewWF_WWTP_B.csv
	TaxMP_MPAv1_NewWF_WWTP_B.csv		Eukaryota	Metazoa	Chordata	Mammalia	Unknown Order	Unknown Family	Unknown Genus	Unknown Species	Unknown Subspecies	1	2		TaxMP_MPAv1_NewWF_WWTP_B.csv
	TaxMP_MPAv1_NewWF_WWTP_B.csv		Eukaryota	Metazoa	Chordata	Mammalia	Primates	Hominidae	Unknown Genus	Unknown Species	Unknown Subspecies	1	1		TaxMP_MPAv1_NewWF_WWTP_B.csv
	TaxMP_MPAv1_NewWF_WWTP_B.csv		Bacteria	Unknown Kingdom	Proteobacteria	Alphaproteobacteria	Rhizobiales	Unknown Family	Unknown Genus	Unknown Species	Unknown Subspecies	2	1		TaxMP_MPAv1_NewWF_WWTP_B.csv
	TaxMP_MPAv1_NewWF_WWTP_B.csv		Eukaryota	Viridiplantae	Streptophyta	Unknown Class	Unknown Order	Unknown Family	Unknown Genus	Unknown Species	Unknown Subspecies	1	1		TaxMP_MPAv1_NewWF_WWTP_B.csv
	TaxMP_MPAv1_NewWF_WWTP_B.csv		Eukaryota	Metazoa	Chordata	Mammalia	Primates	Hominidae	Homo	Homo sapiens	Unknown Subspecies	8	11		TaxMP_MPAv1_NewWF_WWTP_B.csv
	TaxMP_MPAv1_NewWF_WWTP_B.csv		Bacteria	Unknown Kingdom	Cyanobacteria	Unknown Class	Nostocales	Nostocaceae	Anabaena	Anabaena variabilis	Anabaena variabilis ATCC 29413	3	2		TaxMP_MPAv1_NewWF_WWTP_B.csv
	TaxMP_MPAv1_NewWF_WWTP_B.csv		Eukaryota	Unknown Kingdom	Unknown Phylum	Unknown Class	Unknown Order	Unknown Family	Unknown Genus	Unknown Species	Unknown Subspecies	4	2		TaxMP_MPAv1_NewWF_WWTP_B.csv
	TaxMP_MPAv1_NewWF_WWTP_B.csv		Bacteria	Unknown Kingdom	Proteobacteria	Betaproteobacteria	Burkholderiales	Unknown Family	Unknown Genus	Unknown Species	Unknown Subspecies	1	3		TaxMP_MPAv1_NewWF_WWTP_B.csv
	TaxMP_MPAv1_NewWF_WWTP_B.csv		Bacteria	Unknown Kingdom	Proteobacteria	Deltaproteobacteria	Myxococcales	Myxococcaceae	Anaeromyxobacter	Anaeromyxobacter sp. Fw109-5	Unknown Subspecies	1	2		TaxMP_MPAv1_NewWF_WWTP_B.csv
	TaxMP_MPAv1_NewWF_WWTP_B.csv		Bacteria	Unknown Kingdom	Proteobacteria	Betaproteobacteria	Burkholderiales	Comamonadaceae	Verminephrobacter	Verminephrobacter eiseniae	Verminephrobacter eiseniae EF01-2	1	2		TaxMP_MPAv1_NewWF_WWTP_B.csv
	TaxMP_MPAv1_NewWF_WWTP_B.csv		Bacteria	Unknown Kingdom	Actinobacteria	Actinobacteria	Actinomycetales	Mycobacteriaceae	Mycobacterium	Mycobacterium leprae	Mycobacterium leprae TN	1	1		TaxMP_MPAv1_NewWF_WWTP_B.csv
	TaxMP_MPAv1_NewWF_WWTP_B.csv		Bacteria	Unknown Kingdom	Proteobacteria	Betaproteobacteria	Rhodocyclales	Rhodocyclaceae	Aromatoleum	Aromatoleum aromaticum	Aromatoleum aromaticum EbN1	1	1		TaxMP_MPAv1_NewWF_WWTP_B.csv
	TaxMP_MPAv1_NewWF_WWTP_B.csv		Bacteria	Unknown Kingdom	Proteobacteria	Betaproteobacteria	Methylophilales	Methylophilaceae	Methylobacillus	Methylobacillus flagellatus	Methylobacillus flagellatus KT	1	2		TaxMP_MPAv1_NewWF_WWTP_B.csv
	TaxMP_MPAv1_NewWF_WWTP_B.csv		Eukaryota	Metazoa	Unknown Phylum	Unknown Class	Unknown Order	Unknown Family	Unknown Genus	Unknown Species	Unknown Subspecies	2	3		TaxMP_MPAv1_NewWF_WWTP_B.csv
	TaxMP_MPAv1_NewWF_WWTP_B.csv		Bacteria	Unknown Kingdom	Proteobacteria	Betaproteobacteria	Burkholderiales	Comamonadaceae	Variovorax	Variovorax paradoxus	Variovorax paradoxus S110	1	2		TaxMP_MPAv1_NewWF_WWTP_B.csv
	TaxMP_MPAv1_NewWF_WWTP_B.csv		Eukaryota	Metazoa	Chordata	Mammalia	Unknown Order	Bovidae	Bos	Bos taurus	Unknown Subspecies	1	1		TaxMP_MPAv1_NewWF_WWTP_B.csv
	TaxMP_MPAv1_NewWF_WWTP_B.csv		Eukaryota	Metazoa	Nematoda	Chromadorea	Rhabditida	Rhabditidae	Caenorhabditis	Caenorhabditis elegans	Unknown Subspecies	1	1		TaxMP_MPAv1_NewWF_WWTP_B.csv
	TaxMP_MPAv1_NewWF_WWTP_B.csv		Eukaryota	Metazoa	Chordata	Unknown Class	Unknown Order	Unknown Family	Unknown Genus	Unknown Species	Unknown Subspecies	1	4		TaxMP_MPAv1_NewWF_WWTP_B.csv
	TaxMP_MPAv1_NewWF_WWTP_C.csv		Unknown Superkingdom	Unknown Kingdom	Unknown Phylum	Unknown Class	Unknown Order	Unknown Family	Unknown Genus	Unknown Species	Unknown Subspecies	82	119		TaxMP_MPAv1_NewWF_WWTP_C.csv
	TaxMP_MPAv1_NewWF_WWTP_C.csv		Eukaryota	Metazoa	Chordata	Mammalia	Unknown Order	Unknown Family	Unknown Genus	Unknown Species	Unknown Subspecies	3	5		TaxMP_MPAv1_NewWF_WWTP_C.csv
	TaxMP_MPAv1_NewWF_WWTP_C.csv		Bacteria	Unknown Kingdom	Actinobacteria	Actinobacteria	Actinomycetales	Mycobacteriaceae	Mycobacterium	Unknown Species	Unknown Subspecies	1	2		TaxMP_MPAv1_NewWF_WWTP_C.csv
	TaxMP_MPAv1_NewWF_WWTP_C.csv		Bacteria	Unknown Kingdom	Proteobacteria	Gammaproteobacteria	Xanthomonadales	Xanthomonadaceae	Xanthomonas	Xanthomonas citri	Xanthomonas axonopodis pv. citri str. 306	1	1		TaxMP_MPAv1_NewWF_WWTP_C.csv
	TaxMP_MPAv1_NewWF_WWTP_C.csv		Bacteria	Unknown Kingdom	Proteobacteria	Gammaproteobacteria	Vibrionales	Vibrionaceae	Vibrio	Vibrio parahaemolyticus	Vibrio parahaemolyticus RIMD 2210633	1	2		TaxMP_MPAv1_NewWF_WWTP_C.csv
	TaxMP_MPAv1_NewWF_WWTP_C.csv		Eukaryota	Metazoa	Chordata	Mammalia	Primates	Hominidae	Homo	Homo sapiens	Unknown Subspecies	6	13		TaxMP_MPAv1_NewWF_WWTP_C.csv
	TaxMP_MPAv1_NewWF_WWTP_C.csv		Eukaryota	Unknown Kingdom	Unknown Phylum	Unknown Class	Unknown Order	Unknown Family	Unknown Genus	Unknown Species	Unknown Subspecies	3	5		TaxMP_MPAv1_NewWF_WWTP_C.csv
	TaxMP_MPAv1_NewWF_WWTP_C.csv		Bacteria	Unknown Kingdom	Proteobacteria	Betaproteobacteria	Unknown Order	Unknown Family	Unknown Genus	Unknown Species	Unknown Subspecies	1	1		TaxMP_MPAv1_NewWF_WWTP_C.csv
	TaxMP_MPAv1_NewWF_WWTP_C.csv		Bacteria	Unknown Kingdom	Proteobacteria	Unknown Class	Unknown Order	Unknown Family	Unknown Genus	Unknown Species	Unknown Subspecies	2	1		TaxMP_MPAv1_NewWF_WWTP_C.csv
	TaxMP_MPAv1_NewWF_WWTP_C.csv		Eukaryota	Unknown Kingdom	Apicomplexa	Aconoidasida	Haemosporida	Unknown Family	Plasmodium	Plasmodium falciparum	Plasmodium falciparum HB3	1	1		TaxMP_MPAv1_NewWF_WWTP_C.csv
	TaxMP_MPAv1_NewWF_WWTP_C.csv		Eukaryota	Viridiplantae	Streptophyta	Unknown Class	Geraniales	Geraniaceae	Pelargonium	Pelargonium x hortorum	Unknown Subspecies	1	1		TaxMP_MPAv1_NewWF_WWTP_C.csv
	TaxMP_MPAv1_NewWF_WWTP_C.csv		Eukaryota	Metazoa	Nematoda	Chromadorea	Rhabditida	Rhabditidae	Caenorhabditis	Caenorhabditis elegans	Unknown Subspecies	1	1		TaxMP_MPAv1_NewWF_WWTP_C.csv
	TaxMP_MPAv1_OldWF_BGP_1_A.csv		Unknown Superkingdom	Unknown Kingdom	Unknown Phylum	Unknown Class	Unknown Order	Unknown Family	Unknown Genus	Unknown Species	Unknown Subspecies	2847	6063		TaxMP_MPAv1_OldWF_BGP_1_A.csv
	TaxMP_MPAv1_OldWF_BGP_1_A.csv		Bacteria	Unknown Kingdom	Unknown Phylum	Unknown Class	Unknown Order	Unknown Family	Unknown Genus	Unknown Species	Unknown Subspecies	2	1		TaxMP_MPAv1_OldWF_BGP_1_A.csv
	TaxMP_MPAv1_OldWF_BGP_1_A.csv		Viruses	Unknown Kingdom	Unknown Phylum	Unknown Class	Unknown Order	Togaviridae	Alphavirus	Eastern equine encephalitis virus	Eastern equine encephalitis virus (strain Florida 91-469)	1	1		TaxMP_MPAv1_OldWF_BGP_1_A.csv
	TaxMP_MPAv1_OldWF_BGP_1_A.csv		Bacteria	Unknown Kingdom	Proteobacteria	Gammaproteobacteria	Enterobacteriales	Enterobacteriaceae	Escherichia	Escherichia coli	Escherichia coli K-12	5	13		TaxMP_MPAv1_OldWF_BGP_1_A.csv
	TaxMP_MPAv1_OldWF_BGP_1_A.csv		Viruses	Unknown Kingdom	Unknown Phylum	Unknown Class	Unknown Order	Iridoviridae	Ranavirus	Frog virus 3	Frog virus 3 (isolate Goorha)	1	2		TaxMP_MPAv1_OldWF_BGP_1_A.csv
	TaxMP_MPAv1_OldWF_BGP_1_A.csv		Eukaryota	Metazoa	Chordata	Mammalia	Primates	Hominidae	Homo	Homo sapiens	Unknown Subspecies	11	16		TaxMP_MPAv1_OldWF_BGP_1_A.csv
	TaxMP_MPAv1_OldWF_BGP_1_A.csv		Eukaryota	Unknown Kingdom	Unknown Phylum	Unknown Class	Unknown Order	Unknown Family	Unknown Genus	Unknown Species	Unknown Subspecies	3	2		TaxMP_MPAv1_OldWF_BGP_1_A.csv
	TaxMP_MPAv1_OldWF_BGP_1_A.csv		Bacteria	Unknown Kingdom	Proteobacteria	Unknown Class	Unknown Order	Unknown Family	Unknown Genus	Unknown Species	Unknown Subspecies	2	3		TaxMP_MPAv1_OldWF_BGP_1_A.csv
	TaxMP_MPAv1_OldWF_BGP_1_A.csv		Eukaryota	Fungi	Ascomycota	Dothideomycetes	Pleosporales	Phaeosphaeriaceae	Phaeosphaeria	Phaeosphaeria nodorum	Phaeosphaeria nodorum SN15	1	1		TaxMP_MPAv1_OldWF_BGP_1_A.csv
	TaxMP_MPAv1_OldWF_BGP_1_A.csv		Eukaryota	Viridiplantae	Streptophyta	Liliopsida	Poales	Poaceae	Oryza	Oryza sativa	Oryza sativa Japonica Group	3	11		TaxMP_MPAv1_OldWF_BGP_1_A.csv
	TaxMP_MPAv1_OldWF_BGP_1_A.csv		Bacteria	Unknown Kingdom	Proteobacteria	Betaproteobacteria	Burkholderiales	Comamonadaceae	Polaromonas	Polaromonas sp. JS666	Unknown Subspecies	1	1		TaxMP_MPAv1_OldWF_BGP_1_A.csv
	TaxMP_MPAv1_OldWF_BGP_1_A.csv		Bacteria	Unknown Kingdom	Proteobacteria	Alphaproteobacteria	Rhodospirillales	Acetobacteraceae	Gluconobacter	Gluconobacter oxydans	Gluconobacter oxydans 621H	1	1		TaxMP_MPAv1_OldWF_BGP_1_A.csv
	TaxMP_MPAv1_OldWF_BGP_1_A.csv		Bacteria	Unknown Kingdom	Firmicutes	Clostridia	Clostridiales	Clostridiaceae	Clostridium	Unknown Species	Unknown Subspecies	1	1		TaxMP_MPAv1_OldWF_BGP_1_A.csv
	TaxMP_MPAv1_OldWF_BGP_1_A.csv		Bacteria	Unknown Kingdom	Firmicutes	Bacilli	Bacillales	Bacillaceae	Geobacillus	Geobacillus thermodenitrificans	Geobacillus thermodenitrificans NG80-2	1	1		TaxMP_MPAv1_OldWF_BGP_1_A.csv
	TaxMP_MPAv1_OldWF_BGP_1_A.csv		Bacteria	Unknown Kingdom	Actinobacteria	Actinobacteria	Actinomycetales	Mycobacteriaceae	Mycobacterium	Mycobacterium leprae	Mycobacterium leprae Br4923	1	1		TaxMP_MPAv1_OldWF_BGP_1_A.csv
	TaxMP_MPAv1_OldWF_BGP_1_A.csv		Bacteria	Unknown Kingdom	Proteobacteria	Betaproteobacteria	Rhodocyclales	Rhodocyclaceae	Aromatoleum	Aromatoleum aromaticum	Aromatoleum aromaticum EbN1	1	2		TaxMP_MPAv1_OldWF_BGP_1_A.csv
	TaxMP_MPAv1_OldWF_BGP_1_A.csv		Bacteria	Unknown Kingdom	Firmicutes	Bacilli	Lactobacillales	Streptococcaceae	Streptococcus	Unknown Species	Unknown Subspecies	4	8		TaxMP_MPAv1_OldWF_BGP_1_A.csv
	TaxMP_MPAv1_OldWF_BGP_1_A.csv		Eukaryota	Viridiplantae	Streptophyta	Unknown Class	Sapindales	Rutaceae	Citrus	Citrus sinensis	Unknown Subspecies	1	1		TaxMP_MPAv1_OldWF_BGP_1_A.csv
	TaxMP_MPAv1_OldWF_BGP_1_A.csv		Archaea	Unknown Kingdom	Euryarchaeota	Thermoplasmata	Thermoplasmatales	Thermoplasmataceae	Thermoplasma	Thermoplasma volcanium	Thermoplasma volcanium GSS1	1	1		TaxMP_MPAv1_OldWF_BGP_1_A.csv
	TaxMP_MPAv1_OldWF_BGP_1_A.csv		Bacteria	Unknown Kingdom	Firmicutes	Clostridia	Clostridiales	Clostridiaceae	Clostridium	Clostridium botulinum	Clostridium botulinum E3 str. Alaska E43	1	1		TaxMP_MPAv1_OldWF_BGP_1_A.csv
	TaxMP_MPAv1_OldWF_BGP_1_A.csv		Bacteria	Unknown Kingdom	Firmicutes	Clostridia	Clostridiales	Clostridiaceae	Clostridium	Clostridium perfringens	Clostridium perfringens str. 13	1	1		TaxMP_MPAv1_OldWF_BGP_1_A.csv
	TaxMP_MPAv1_OldWF_BGP_1_A.csv		Bacteria	Unknown Kingdom	Firmicutes	Clostridia	Clostridiales	Clostridiaceae	Clostridium	Clostridium perfringens	Clostridium perfringens ATCC 13124	1	1		TaxMP_MPAv1_OldWF_BGP_1_A.csv
	TaxMP_MPAv1_OldWF_BGP_1_A.csv		Bacteria	Unknown Kingdom	Firmicutes	Clostridia	Clostridiales	Clostridiaceae	Clostridium	Clostridium perfringens	Unknown Subspecies	1	5		TaxMP_MPAv1_OldWF_BGP_1_A.csv
	TaxMP_MPAv1_OldWF_BGP_1_A.csv		Eukaryota	Metazoa	Chordata	Mammalia	Unknown Order	Suidae	Sus	Sus scrofa	Unknown Subspecies	1	1		TaxMP_MPAv1_OldWF_BGP_1_A.csv
	TaxMP_MPAv1_OldWF_BGP_1_A.csv		Archaea	Unknown Kingdom	Euryarchaeota	Methanomicrobia	Methanosarcinales	Methanosarcinaceae	Methanosarcina	Unknown Species	Unknown Subspecies	4	7		TaxMP_MPAv1_OldWF_BGP_1_A.csv
	TaxMP_MPAv1_OldWF_BGP_1_A.csv		Bacteria	Unknown Kingdom	Proteobacteria	Gammaproteobacteria	Enterobacteriales	Enterobacteriaceae	Unknown Genus	Unknown Species	Unknown Subspecies	2	7		TaxMP_MPAv1_OldWF_BGP_1_A.csv
	TaxMP_MPAv1_OldWF_BGP_1_A.csv		Bacteria	Unknown Kingdom	Firmicutes	Clostridia	Clostridiales	Clostridiaceae	Clostridium	Clostridium botulinum	Clostridium botulinum A2 str. Kyoto	1	1		TaxMP_MPAv1_OldWF_BGP_1_A.csv
	TaxMP_MPAv1_OldWF_BGP_1_A.csv		Eukaryota	Viridiplantae	Streptophyta	Liliopsida	Poales	Poaceae	Zea	Zea mays	Unknown Subspecies	3	5		TaxMP_MPAv1_OldWF_BGP_1_A.csv
	TaxMP_MPAv1_OldWF_BGP_1_A.csv		Archaea	Unknown Kingdom	Euryarchaeota	Methanomicrobia	Methanosarcinales	Methanosarcinaceae	Methanosarcina	Methanosarcina barkeri	Methanosarcina barkeri str. Fusaro	1	1		TaxMP_MPAv1_OldWF_BGP_1_A.csv
	TaxMP_MPAv1_OldWF_BGP_1_A.csv		Eukaryota	Metazoa	Chordata	Mammalia	Unknown Order	Unknown Family	Unknown Genus	Unknown Species	Unknown Subspecies	31	63		TaxMP_MPAv1_OldWF_BGP_1_A.csv
	TaxMP_MPAv1_OldWF_BGP_1_A.csv		Bacteria	Unknown Kingdom	Firmicutes	Bacilli	Lactobacillales	Streptococcaceae	Streptococcus	Streptococcus pyogenes	Unknown Subspecies	1	2		TaxMP_MPAv1_OldWF_BGP_1_A.csv
	TaxMP_MPAv1_OldWF_BGP_1_A.csv		Archaea	Unknown Kingdom	Euryarchaeota	Methanococci	Methanococcales	Methanocaldococcaceae	Methanocaldococcus	Methanocaldococcus jannaschii	Methanocaldococcus jannaschii DSM 2661	1	2		TaxMP_MPAv1_OldWF_BGP_1_A.csv
	TaxMP_MPAv1_OldWF_BGP_1_A.csv		Eukaryota	Viridiplantae	Streptophyta	Unknown Class	Unknown Order	Unknown Family	Unknown Genus	Unknown Species	Unknown Subspecies	12	24		TaxMP_MPAv1_OldWF_BGP_1_A.csv
	TaxMP_MPAv1_OldWF_BGP_1_A.csv		Bacteria	Unknown Kingdom	Firmicutes	Bacilli	Bacillales	Bacillaceae	Bacillus	Bacillus halodurans	Bacillus halodurans C-125	1	1		TaxMP_MPAv1_OldWF_BGP_1_A.csv
	TaxMP_MPAv1_OldWF_BGP_1_A.csv		Bacteria	Unknown Kingdom	Firmicutes	Clostridia	Clostridiales	Clostridiaceae	Clostridium	Clostridium novyi	Clostridium novyi NT	1	1		TaxMP_MPAv1_OldWF_BGP_1_A.csv
	TaxMP_MPAv1_OldWF_BGP_1_A.csv		Bacteria	Unknown Kingdom	Firmicutes	Bacilli	Bacillales	Bacillaceae	Bacillus	Unknown Species	Unknown Subspecies	1	1		TaxMP_MPAv1_OldWF_BGP_1_A.csv
	TaxMP_MPAv1_OldWF_BGP_1_A.csv		Bacteria	Unknown Kingdom	Firmicutes	Bacilli	Lactobacillales	Streptococcaceae	Streptococcus	Streptococcus thermophilus	Streptococcus thermophilus LMD-9	1	1		TaxMP_MPAv1_OldWF_BGP_1_A.csv
	TaxMP_MPAv1_OldWF_BGP_1_A.csv		Bacteria	Unknown Kingdom	Firmicutes	Clostridia	Clostridiales	Clostridiaceae	Clostridium	Clostridium thermocellum	Clostridium thermocellum ATCC 27405	1	1		TaxMP_MPAv1_OldWF_BGP_1_A.csv
	TaxMP_MPAv1_OldWF_BGP_1_A.csv		Bacteria	Unknown Kingdom	Proteobacteria	Alphaproteobacteria	Rhodospirillales	Acetobacteraceae	Acidiphilium	Acidiphilium cryptum	Acidiphilium cryptum JF-5	1	1		TaxMP_MPAv1_OldWF_BGP_1_A.csv
	TaxMP_MPAv1_OldWF_BGP_1_A.csv		Archaea	Unknown Kingdom	Euryarchaeota	Methanomicrobia	Methanomicrobiales	Methanocorpusculaceae	Methanocorpusculum	Methanocorpusculum labreanum	Methanocorpusculum labreanum Z	1	1		TaxMP_MPAv1_OldWF_BGP_1_A.csv
	TaxMP_MPAv1_OldWF_BGP_1_A.csv		Eukaryota	Viridiplantae	Streptophyta	Unknown Class	Solanales	Solanaceae	Solanum	Solanum lycopersicum	Unknown Subspecies	1	1		TaxMP_MPAv1_OldWF_BGP_1_A.csv
	TaxMP_MPAv1_OldWF_BGP_1_A.csv		Bacteria	Unknown Kingdom	Proteobacteria	Gammaproteobacteria	Vibrionales	Vibrionaceae	Aliivibrio	Aliivibrio fischeri	Vibrio fischeri ES114	1	2		TaxMP_MPAv1_OldWF_BGP_1_A.csv
	TaxMP_MPAv1_OldWF_BGP_1_A.csv		Bacteria	Unknown Kingdom	Actinobacteria	Actinobacteria	Actinomycetales	Mycobacteriaceae	Mycobacterium	Mycobacterium leprae	Mycobacterium leprae TN	1	1		TaxMP_MPAv1_OldWF_BGP_1_A.csv
	TaxMP_MPAv1_OldWF_BGP_1_A.csv		Bacteria	Unknown Kingdom	Firmicutes	Bacilli	Unknown Order	Unknown Family	Unknown Genus	Unknown Species	Unknown Subspecies	1	1		TaxMP_MPAv1_OldWF_BGP_1_A.csv
	TaxMP_MPAv1_OldWF_BGP_1_A.csv		Eukaryota	Viridiplantae	Streptophyta	Unknown Class	Brassicales	Brassicaceae	Arabidopsis	Arabidopsis thaliana	Unknown Subspecies	4	4		TaxMP_MPAv1_OldWF_BGP_1_A.csv
	TaxMP_MPAv1_OldWF_BGP_1_A.csv		Bacteria	Unknown Kingdom	Actinobacteria	Actinobacteria	Actinomycetales	Micrococcaceae	Arthrobacter	Arthrobacter chlorophenolicus	Arthrobacter chlorophenolicus A6	1	1		TaxMP_MPAv1_OldWF_BGP_1_A.csv
	TaxMP_MPAv1_OldWF_BGP_1_A.csv		Archaea	Unknown Kingdom	Euryarchaeota	Methanomicrobia	Methanosarcinales	Methanosarcinaceae	Methanosarcina	Methanosarcina mazei	Methanosarcina mazei Go1	4	6		TaxMP_MPAv1_OldWF_BGP_1_A.csv
	TaxMP_MPAv1_OldWF_BGP_1_B.csv		Unknown Superkingdom	Unknown Kingdom	Unknown Phylum	Unknown Class	Unknown Order	Unknown Family	Unknown Genus	Unknown Species	Unknown Subspecies	1801	3322		TaxMP_MPAv1_OldWF_BGP_1_B.csv
	TaxMP_MPAv1_OldWF_BGP_1_B.csv		Bacteria	Unknown Kingdom	Unknown Phylum	Unknown Class	Unknown Order	Unknown Family	Unknown Genus	Unknown Species	Unknown Subspecies	4	3		TaxMP_MPAv1_OldWF_BGP_1_B.csv
	TaxMP_MPAv1_OldWF_BGP_1_B.csv		Eukaryota	Metazoa	Chordata	Mammalia	Rodentia	Muridae	Rattus	Rattus norvegicus	Unknown Subspecies	1	1		TaxMP_MPAv1_OldWF_BGP_1_B.csv
	TaxMP_MPAv1_OldWF_BGP_1_B.csv		Viruses	Unknown Kingdom	Unknown Phylum	Unknown Class	Unknown Order	Iridoviridae	Ranavirus	Frog virus 3	Frog virus 3 (isolate Goorha)	1	1		TaxMP_MPAv1_OldWF_BGP_1_B.csv
	TaxMP_MPAv1_OldWF_BGP_1_B.csv		Eukaryota	Metazoa	Chordata	Mammalia	Primates	Hominidae	Homo	Homo sapiens	Unknown Subspecies	16	29		TaxMP_MPAv1_OldWF_BGP_1_B.csv
	TaxMP_MPAv1_OldWF_BGP_1_B.csv		Eukaryota	Unknown Kingdom	Unknown Phylum	Unknown Class	Unknown Order	Unknown Family	Unknown Genus	Unknown Species	Unknown Subspecies	2	2		TaxMP_MPAv1_OldWF_BGP_1_B.csv
	TaxMP_MPAv1_OldWF_BGP_1_B.csv		Bacteria	Unknown Kingdom	Firmicutes	Clostridia	Clostridiales	Clostridiaceae	Clostridium	Unknown Species	Unknown Subspecies	1	1		TaxMP_MPAv1_OldWF_BGP_1_B.csv
	TaxMP_MPAv1_OldWF_BGP_1_B.csv		Bacteria	Unknown Kingdom	Firmicutes	Bacilli	Bacillales	Bacillaceae	Geobacillus	Geobacillus thermodenitrificans	Geobacillus thermodenitrificans NG80-2	1	1		TaxMP_MPAv1_OldWF_BGP_1_B.csv
	TaxMP_MPAv1_OldWF_BGP_1_B.csv		Eukaryota	Viridiplantae	Streptophyta	Unknown Class	Piperales	Piperaceae	Piper	Piper cenocladum	Unknown Subspecies	1	1		TaxMP_MPAv1_OldWF_BGP_1_B.csv
	TaxMP_MPAv1_OldWF_BGP_1_B.csv		Bacteria	Unknown Kingdom	Firmicutes	Bacilli	Lactobacillales	Streptococcaceae	Streptococcus	Unknown Species	Unknown Subspecies	3	4		TaxMP_MPAv1_OldWF_BGP_1_B.csv
	TaxMP_MPAv1_OldWF_BGP_1_B.csv		Bacteria	Unknown Kingdom	Firmicutes	Bacilli	Bacillales	Staphylococcaceae	Staphylococcus	Staphylococcus aureus	Staphylococcus aureus subsp. aureus	1	1		TaxMP_MPAv1_OldWF_BGP_1_B.csv
	TaxMP_MPAv1_OldWF_BGP_1_B.csv		Archaea	Unknown Kingdom	Euryarchaeota	Unknown Class	Unknown Order	Unknown Family	Unknown Genus	Unknown Species	Unknown Subspecies	4	11		TaxMP_MPAv1_OldWF_BGP_1_B.csv
	TaxMP_MPAv1_OldWF_BGP_1_B.csv		Archaea	Unknown Kingdom	Euryarchaeota	Halobacteria	Halobacteriales	Halobacteriaceae	Halobacterium	Halobacterium salinarum	Halobacterium sp. NRC-1	1	1		TaxMP_MPAv1_OldWF_BGP_1_B.csv
	TaxMP_MPAv1_OldWF_BGP_1_B.csv		Eukaryota	Metazoa	Chordata	Mammalia	Unknown Order	Suidae	Sus	Sus scrofa	Unknown Subspecies	1	2		TaxMP_MPAv1_OldWF_BGP_1_B.csv
	TaxMP_MPAv1_OldWF_BGP_1_B.csv		Eukaryota	Metazoa	Chordata	Unknown Class	Unknown Order	Unknown Family	Unknown Genus	Unknown Species	Unknown Subspecies	19	68		TaxMP_MPAv1_OldWF_BGP_1_B.csv
	TaxMP_MPAv1_OldWF_BGP_1_B.csv		Archaea	Unknown Kingdom	Euryarchaeota	Methanomicrobia	Methanosarcinales	Methanosarcinaceae	Methanosarcina	Unknown Species	Unknown Subspecies	1	2		TaxMP_MPAv1_OldWF_BGP_1_B.csv
	TaxMP_MPAv1_OldWF_BGP_1_B.csv		Eukaryota	Viridiplantae	Streptophyta	Liliopsida	Poales	Poaceae	Zea	Zea mays	Unknown Subspecies	3	5		TaxMP_MPAv1_OldWF_BGP_1_B.csv
	TaxMP_MPAv1_OldWF_BGP_1_B.csv		Bacteria	Unknown Kingdom	Firmicutes	Clostridia	Clostridiales	Clostridiaceae	Clostridium	Clostridium botulinum	Clostridium botulinum A3 str. Loch Maree	1	2		TaxMP_MPAv1_OldWF_BGP_1_B.csv
	TaxMP_MPAv1_OldWF_BGP_1_B.csv		Eukaryota	Metazoa	Chordata	Mammalia	Unknown Order	Unknown Family	Unknown Genus	Unknown Species	Unknown Subspecies	31	71		TaxMP_MPAv1_OldWF_BGP_1_B.csv
	TaxMP_MPAv1_OldWF_BGP_1_B.csv		Eukaryota	Viridiplantae	Streptophyta	Unknown Class	Unknown Order	Unknown Family	Unknown Genus	Unknown Species	Unknown Subspecies	6	8		TaxMP_MPAv1_OldWF_BGP_1_B.csv
	TaxMP_MPAv1_OldWF_BGP_1_B.csv		Bacteria	Unknown Kingdom	Firmicutes	Clostridia	Clostridiales	Clostridiaceae	Clostridium	Clostridium novyi	Clostridium novyi NT	2	2		TaxMP_MPAv1_OldWF_BGP_1_B.csv
	TaxMP_MPAv1_OldWF_BGP_1_B.csv		Bacteria	Unknown Kingdom	Firmicutes	Bacilli	Bacillales	Bacillaceae	Bacillus	Unknown Species	Unknown Subspecies	1	1		TaxMP_MPAv1_OldWF_BGP_1_B.csv
	TaxMP_MPAv1_OldWF_BGP_1_B.csv		Eukaryota	Fungi	Ascomycota	Saccharomycetes	Saccharomycetales	Dipodascaceae	Yarrowia	Yarrowia lipolytica	Yarrowia lipolytica CLIB122	1	1		TaxMP_MPAv1_OldWF_BGP_1_B.csv
	TaxMP_MPAv1_OldWF_BGP_1_B.csv		Bacteria	Unknown Kingdom	Firmicutes	Clostridia	Clostridiales	Clostridiaceae	Clostridium	Clostridium botulinum	Clostridium botulinum A str. ATCC 19397	1	1		TaxMP_MPAv1_OldWF_BGP_1_B.csv
	TaxMP_MPAv1_OldWF_BGP_1_B.csv		Archaea	Unknown Kingdom	Euryarchaeota	Methanobacteria	Methanobacteriales	Unknown Family	Unknown Genus	Unknown Species	Unknown Subspecies	2	3		TaxMP_MPAv1_OldWF_BGP_1_B.csv
	TaxMP_MPAv1_OldWF_BGP_1_B.csv		Bacteria	Unknown Kingdom	Firmicutes	Clostridia	Unknown Order	Unknown Family	Unknown Genus	Unknown Species	Unknown Subspecies	1	1		TaxMP_MPAv1_OldWF_BGP_1_B.csv
	TaxMP_MPAv1_OldWF_BGP_1_B.csv		Eukaryota	Fungi	Ascomycota	Saccharomycetes	Saccharomycetales	Saccharomycetaceae	Saccharomyces	Saccharomyces cerevisiae	Saccharomyces cerevisiae S288c	1	1		TaxMP_MPAv1_OldWF_BGP_1_B.csv
	TaxMP_MPAv1_OldWF_BGP_1_B.csv		Eukaryota	Fungi	Ascomycota	Eurotiomycetes	Eurotiales	Trichocomaceae	Aspergillus	Aspergillus niger	Aspergillus niger CBS 513.88	1	1		TaxMP_MPAv1_OldWF_BGP_1_B.csv
	TaxMP_MPAv1_OldWF_BGP_1_B.csv		Eukaryota	Viridiplantae	Streptophyta	Unknown Class	Brassicales	Brassicaceae	Arabidopsis	Arabidopsis thaliana	Unknown Subspecies	2	2		TaxMP_MPAv1_OldWF_BGP_1_B.csv
	TaxMP_MPAv1_OldWF_BGP_1_B.csv		Bacteria	Unknown Kingdom	Actinobacteria	Actinobacteria	Actinomycetales	Micromonosporaceae	Salinispora	Salinispora arenicola	Salinispora arenicola CNS-205	1	1		TaxMP_MPAv1_OldWF_BGP_1_B.csv
	TaxMP_MPAv1_OldWF_BGP_1_B.csv		Archaea	Unknown Kingdom	Euryarchaeota	Methanomicrobia	Methanosarcinales	Methanosarcinaceae	Methanosarcina	Methanosarcina mazei	Methanosarcina mazei Go1	1	1		TaxMP_MPAv1_OldWF_BGP_1_B.csv
	TaxMP_MPAv1_OldWF_BGP_1_B.csv		Bacteria	Unknown Kingdom	Firmicutes	Clostridia	Clostridiales	Clostridiaceae	Clostridium	Clostridium kluyveri	Clostridium kluyveri NBRC 12016	1	1		TaxMP_MPAv1_OldWF_BGP_1_B.csv
	TaxMP_MPAv1_OldWF_BGP_1_B.csv		Eukaryota	Unknown Kingdom	Phaeophyceae	Unknown Class	Dictyotales	Dictyotaceae	Dictyota	Dictyota dichotoma	Unknown Subspecies	1	1		TaxMP_MPAv1_OldWF_BGP_1_B.csv
	TaxMP_MPAv1_OldWF_BGP_1_B.csv		Bacteria	Unknown Kingdom	Actinobacteria	Actinobacteria	Actinomycetales	Micrococcaceae	Arthrobacter	Unknown Species	Unknown Subspecies	1	1		TaxMP_MPAv1_OldWF_BGP_1_B.csv
	TaxMP_MPAv1_OldWF_BGP_1_C.csv		Unknown Superkingdom	Unknown Kingdom	Unknown Phylum	Unknown Class	Unknown Order	Unknown Family	Unknown Genus	Unknown Species	Unknown Subspecies	1830	3418		TaxMP_MPAv1_OldWF_BGP_1_C.csv
	TaxMP_MPAv1_OldWF_BGP_1_C.csv		Bacteria	Unknown Kingdom	Unknown Phylum	Unknown Class	Unknown Order	Unknown Family	Unknown Genus	Unknown Species	Unknown Subspecies	7	9		TaxMP_MPAv1_OldWF_BGP_1_C.csv
	TaxMP_MPAv1_OldWF_BGP_1_C.csv		Eukaryota	Metazoa	Chordata	Mammalia	Rodentia	Muridae	Rattus	Rattus norvegicus	Unknown Subspecies	1	1		TaxMP_MPAv1_OldWF_BGP_1_C.csv
	TaxMP_MPAv1_OldWF_BGP_1_C.csv		Eukaryota	Metazoa	Chordata	Mammalia	Primates	Hominidae	Unknown Genus	Unknown Species	Unknown Subspecies	1	1		TaxMP_MPAv1_OldWF_BGP_1_C.csv
	TaxMP_MPAv1_OldWF_BGP_1_C.csv		Eukaryota	Metazoa	Chordata	Mammalia	Primates	Hominidae	Homo	Homo sapiens	Unknown Subspecies	13	23		TaxMP_MPAv1_OldWF_BGP_1_C.csv
	TaxMP_MPAv1_OldWF_BGP_1_C.csv		Bacteria	Unknown Kingdom	Proteobacteria	Gammaproteobacteria	Pseudomonadales	Pseudomonadaceae	Pseudomonas	Pseudomonas aeruginosa	Pseudomonas aeruginosa PAO1	1	1		TaxMP_MPAv1_OldWF_BGP_1_C.csv
	TaxMP_MPAv1_OldWF_BGP_1_C.csv		Eukaryota	Unknown Kingdom	Unknown Phylum	Unknown Class	Unknown Order	Unknown Family	Unknown Genus	Unknown Species	Unknown Subspecies	1	2		TaxMP_MPAv1_OldWF_BGP_1_C.csv
	TaxMP_MPAv1_OldWF_BGP_1_C.csv		Eukaryota	Viridiplantae	Streptophyta	Liliopsida	Poales	Poaceae	Oryza	Oryza sativa	Oryza sativa Japonica Group	1	1		TaxMP_MPAv1_OldWF_BGP_1_C.csv
	TaxMP_MPAv1_OldWF_BGP_1_C.csv		Bacteria	Unknown Kingdom	Firmicutes	Clostridia	Thermoanaerobacterales	Thermoanaerobacteraceae	Thermoanaerobacter	Thermoanaerobacter brockii	Unknown Subspecies	1	2		TaxMP_MPAv1_OldWF_BGP_1_C.csv
	TaxMP_MPAv1_OldWF_BGP_1_C.csv		Bacteria	Unknown Kingdom	Firmicutes	Clostridia	Clostridiales	Clostridiaceae	Clostridium	Unknown Species	Unknown Subspecies	2	3		TaxMP_MPAv1_OldWF_BGP_1_C.csv
	TaxMP_MPAv1_OldWF_BGP_1_C.csv		Bacteria	Unknown Kingdom	Firmicutes	Clostridia	Clostridiales	Heliobacteriaceae	Heliobacterium	Heliobacterium modesticaldum	Heliobacterium modesticaldum Ice1	1	1		TaxMP_MPAv1_OldWF_BGP_1_C.csv
	TaxMP_MPAv1_OldWF_BGP_1_C.csv		Archaea	Unknown Kingdom	Euryarchaeota	Methanomicrobia	Methanomicrobiales	Unknown Family	Unknown Genus	Unknown Species	Unknown Subspecies	2	6		TaxMP_MPAv1_OldWF_BGP_1_C.csv
	TaxMP_MPAv1_OldWF_BGP_1_C.csv		Bacteria	Unknown Kingdom	Firmicutes	Clostridia	Clostridiales	Clostridiaceae	Clostridium	Clostridium botulinum	Clostridium botulinum B str. Eklund 17B(NRP)	1	2		TaxMP_MPAv1_OldWF_BGP_1_C.csv
	TaxMP_MPAv1_OldWF_BGP_1_C.csv		Bacteria	Unknown Kingdom	Actinobacteria	Actinobacteria	Actinomycetales	Mycobacteriaceae	Mycobacterium	Mycobacterium leprae	Mycobacterium leprae Br4923	1	1		TaxMP_MPAv1_OldWF_BGP_1_C.csv
	TaxMP_MPAv1_OldWF_BGP_1_C.csv		Bacteria	Unknown Kingdom	Proteobacteria	Betaproteobacteria	Rhodocyclales	Rhodocyclaceae	Aromatoleum	Aromatoleum aromaticum	Aromatoleum aromaticum EbN1	1	2		TaxMP_MPAv1_OldWF_BGP_1_C.csv
	TaxMP_MPAv1_OldWF_BGP_1_C.csv		Bacteria	Unknown Kingdom	Bacteroidetes	Bacteroidia	Bacteroidales	Bacteroidaceae	Bacteroides	Bacteroides ovatus	Unknown Subspecies	1	1		TaxMP_MPAv1_OldWF_BGP_1_C.csv
	TaxMP_MPAv1_OldWF_BGP_1_C.csv		Bacteria	Unknown Kingdom	Firmicutes	Bacilli	Lactobacillales	Streptococcaceae	Streptococcus	Unknown Species	Unknown Subspecies	1	2		TaxMP_MPAv1_OldWF_BGP_1_C.csv
	TaxMP_MPAv1_OldWF_BGP_1_C.csv		Bacteria	Unknown Kingdom	Firmicutes	Clostridia	Clostridiales	Clostridiaceae	Clostridium	Clostridium botulinum	Clostridium botulinum E3 str. Alaska E43	1	1		TaxMP_MPAv1_OldWF_BGP_1_C.csv
	TaxMP_MPAv1_OldWF_BGP_1_C.csv		Eukaryota	Metazoa	Chordata	Mammalia	Unknown Order	Suidae	Sus	Sus scrofa	Unknown Subspecies	1	3		TaxMP_MPAv1_OldWF_BGP_1_C.csv
	TaxMP_MPAv1_OldWF_BGP_1_C.csv		Archaea	Unknown Kingdom	Euryarchaeota	Methanomicrobia	Methanosarcinales	Methanosarcinaceae	Methanosarcina	Unknown Species	Unknown Subspecies	14	33		TaxMP_MPAv1_OldWF_BGP_1_C.csv
	TaxMP_MPAv1_OldWF_BGP_1_C.csv		Eukaryota	Metazoa	Chordata	Unknown Class	Unknown Order	Unknown Family	Unknown Genus	Unknown Species	Unknown Subspecies	65	192		TaxMP_MPAv1_OldWF_BGP_1_C.csv
	TaxMP_MPAv1_OldWF_BGP_1_C.csv		Bacteria	Unknown Kingdom	Firmicutes	Clostridia	Clostridiales	Clostridiaceae	Clostridium	Clostridium perfringens	Clostridium perfringens SM101	1	1		TaxMP_MPAv1_OldWF_BGP_1_C.csv
	TaxMP_MPAv1_OldWF_BGP_1_C.csv		Eukaryota	Viridiplantae	Streptophyta	Liliopsida	Poales	Poaceae	Zea	Zea mays	Unknown Subspecies	2	5		TaxMP_MPAv1_OldWF_BGP_1_C.csv
	TaxMP_MPAv1_OldWF_BGP_1_C.csv		Archaea	Unknown Kingdom	Euryarchaeota	Methanomicrobia	Methanosarcinales	Methanosarcinaceae	Methanosarcina	Methanosarcina thermophila	Unknown Subspecies	1	1		TaxMP_MPAv1_OldWF_BGP_1_C.csv
	TaxMP_MPAv1_OldWF_BGP_1_C.csv		Bacteria	Unknown Kingdom	Proteobacteria	Gammaproteobacteria	Enterobacteriales	Enterobacteriaceae	Citrobacter	Citrobacter freundii	Unknown Subspecies	1	1		TaxMP_MPAv1_OldWF_BGP_1_C.csv
	TaxMP_MPAv1_OldWF_BGP_1_C.csv		Eukaryota	Metazoa	Chordata	Mammalia	Unknown Order	Unknown Family	Unknown Genus	Unknown Species	Unknown Subspecies	6	6		TaxMP_MPAv1_OldWF_BGP_1_C.csv
	TaxMP_MPAv1_OldWF_BGP_1_C.csv		Bacteria	Unknown Kingdom	Actinobacteria	Actinobacteria	Actinomycetales	Mycobacteriaceae	Mycobacterium	Unknown Species	Unknown Subspecies	1	1		TaxMP_MPAv1_OldWF_BGP_1_C.csv
	TaxMP_MPAv1_OldWF_BGP_1_C.csv		Eukaryota	Metazoa	Chordata	Amphibia	Anura	Pipidae	Xenopus	Xenopus laevis	Unknown Subspecies	1	1		TaxMP_MPAv1_OldWF_BGP_1_C.csv
	TaxMP_MPAv1_OldWF_BGP_1_C.csv		Eukaryota	Metazoa	Chordata	Aves	Columbiformes	Columbidae	Columba	Columba livia	Unknown Subspecies	1	1		TaxMP_MPAv1_OldWF_BGP_1_C.csv
	TaxMP_MPAv1_OldWF_BGP_1_C.csv		Eukaryota	Viridiplantae	Streptophyta	Unknown Class	Unknown Order	Unknown Family	Unknown Genus	Unknown Species	Unknown Subspecies	5	5		TaxMP_MPAv1_OldWF_BGP_1_C.csv
	TaxMP_MPAv1_OldWF_BGP_1_C.csv		Bacteria	Unknown Kingdom	Firmicutes	Bacilli	Bacillales	Bacillaceae	Bacillus	Bacillus halodurans	Bacillus halodurans C-125	2	3		TaxMP_MPAv1_OldWF_BGP_1_C.csv
	TaxMP_MPAv1_OldWF_BGP_1_C.csv		Bacteria	Unknown Kingdom	Firmicutes	Clostridia	Clostridiales	Clostridiaceae	Clostridium	Clostridium novyi	Clostridium novyi NT	1	1		TaxMP_MPAv1_OldWF_BGP_1_C.csv
	TaxMP_MPAv1_OldWF_BGP_1_C.csv		Eukaryota	Metazoa	Chordata	Mammalia	Rodentia	Muridae	Mus	Mus musculus	Unknown Subspecies	1	1		TaxMP_MPAv1_OldWF_BGP_1_C.csv
	TaxMP_MPAv1_OldWF_BGP_1_C.csv		Archaea	Unknown Kingdom	Euryarchaeota	Methanomicrobia	Methanosarcinales	Methanosarcinaceae	Methanococcoides	Methanococcoides burtonii	Methanococcoides burtonii DSM 6242	1	1		TaxMP_MPAv1_OldWF_BGP_1_C.csv
	TaxMP_MPAv1_OldWF_BGP_1_C.csv		Bacteria	Unknown Kingdom	Firmicutes	Clostridia	Unknown Order	Unknown Family	Unknown Genus	Unknown Species	Unknown Subspecies	3	2		TaxMP_MPAv1_OldWF_BGP_1_C.csv
	TaxMP_MPAv1_OldWF_BGP_1_C.csv		Bacteria	Unknown Kingdom	Firmicutes	Bacilli	Unknown Order	Unknown Family	Unknown Genus	Unknown Species	Unknown Subspecies	2	2		TaxMP_MPAv1_OldWF_BGP_1_C.csv
	TaxMP_MPAv1_OldWF_BGP_1_C.csv		Eukaryota	Viridiplantae	Streptophyta	Unknown Class	Brassicales	Brassicaceae	Arabidopsis	Arabidopsis thaliana	Unknown Subspecies	2	2		TaxMP_MPAv1_OldWF_BGP_1_C.csv
	TaxMP_MPAv1_OldWF_BGP_1_C.csv		Eukaryota	Metazoa	Unknown Phylum	Unknown Class	Unknown Order	Unknown Family	Unknown Genus	Unknown Species	Unknown Subspecies	2	1		TaxMP_MPAv1_OldWF_BGP_1_C.csv
	TaxMP_MPAv1_OldWF_BGP_1_C.csv		Archaea	Unknown Kingdom	Euryarchaeota	Methanomicrobia	Methanosarcinales	Methanosarcinaceae	Methanosarcina	Methanosarcina mazei	Methanosarcina mazei Go1	2	2		TaxMP_MPAv1_OldWF_BGP_1_C.csv
	TaxMP_MPAv1_OldWF_BGP_1_C.csv		Viruses	Unknown Kingdom	Unknown Phylum	Unknown Class	Herpesvirales	Malacoherpesviridae	Ostreavirus	Ostreid herpesvirus 1	Ostreid herpesvirus 1 (isolate France)	1	1		TaxMP_MPAv1_OldWF_BGP_1_C.csv
	TaxMP_MPAv1_OldWF_BGP_1_C.csv		Bacteria	Unknown Kingdom	Proteobacteria	Betaproteobacteria	Burkholderiales	Burkholderiaceae	Burkholderia	Burkholderia cenocepacia	Unknown Subspecies	1	1		TaxMP_MPAv1_OldWF_BGP_1_C.csv
	TaxMP_MPAv1_OldWF_BGP_2_A.csv		Unknown Superkingdom	Unknown Kingdom	Unknown Phylum	Unknown Class	Unknown Order	Unknown Family	Unknown Genus	Unknown Species	Unknown Subspecies	330	504		TaxMP_MPAv1_OldWF_BGP_2_A.csv
	TaxMP_MPAv1_OldWF_BGP_2_A.csv		Archaea	Unknown Kingdom	Euryarchaeota	Methanomicrobia	Methanosarcinales	Methanosarcinaceae	Methanosarcina	Methanosarcina barkeri	Methanosarcina barkeri str. Fusaro	1	2		TaxMP_MPAv1_OldWF_BGP_2_A.csv
	TaxMP_MPAv1_OldWF_BGP_2_A.csv		Eukaryota	Metazoa	Chordata	Mammalia	Unknown Order	Unknown Family	Unknown Genus	Unknown Species	Unknown Subspecies	9	12		TaxMP_MPAv1_OldWF_BGP_2_A.csv
	TaxMP_MPAv1_OldWF_BGP_2_A.csv		Eukaryota	Viridiplantae	Streptophyta	Unknown Class	Unknown Order	Unknown Family	Unknown Genus	Unknown Species	Unknown Subspecies	1	2		TaxMP_MPAv1_OldWF_BGP_2_A.csv
	TaxMP_MPAv1_OldWF_BGP_2_A.csv		Eukaryota	Metazoa	Chordata	Mammalia	Primates	Hominidae	Homo	Homo sapiens	Unknown Subspecies	1	2		TaxMP_MPAv1_OldWF_BGP_2_A.csv
	TaxMP_MPAv1_OldWF_BGP_2_A.csv		Bacteria	Unknown Kingdom	Cyanobacteria	Unknown Class	Nostocales	Nostocaceae	Anabaena	Anabaena variabilis	Anabaena variabilis ATCC 29413	1	1		TaxMP_MPAv1_OldWF_BGP_2_A.csv
	TaxMP_MPAv1_OldWF_BGP_2_A.csv		Eukaryota	Unknown Kingdom	Unknown Phylum	Unknown Class	Unknown Order	Unknown Family	Unknown Genus	Unknown Species	Unknown Subspecies	1	2		TaxMP_MPAv1_OldWF_BGP_2_A.csv
	TaxMP_MPAv1_OldWF_BGP_2_A.csv		Bacteria	Unknown Kingdom	Proteobacteria	Unknown Class	Unknown Order	Unknown Family	Unknown Genus	Unknown Species	Unknown Subspecies	2	1		TaxMP_MPAv1_OldWF_BGP_2_A.csv
	TaxMP_MPAv1_OldWF_BGP_2_A.csv		Archaea	Unknown Kingdom	Euryarchaeota	Methanomicrobia	Methanosarcinales	Methanosarcinaceae	Methanosarcina	Methanosarcina acetivorans	Methanosarcina acetivorans C2A	2	3		TaxMP_MPAv1_OldWF_BGP_2_A.csv
	TaxMP_MPAv1_OldWF_BGP_2_A.csv		Eukaryota	Viridiplantae	Streptophyta	Liliopsida	Poales	Poaceae	Oryza	Oryza sativa	Oryza sativa Japonica Group	1	1		TaxMP_MPAv1_OldWF_BGP_2_A.csv
	TaxMP_MPAv1_OldWF_BGP_2_A.csv		Bacteria	Unknown Kingdom	Spirochaetes	Spirochaetia	Spirochaetales	Spirochaetaceae	Treponema	Treponema pallidum subsp. pallidum str. Nichols	Treponema pallidum subsp. pallidum	1	1		TaxMP_MPAv1_OldWF_BGP_2_A.csv
	TaxMP_MPAv1_OldWF_BGP_2_A.csv		Archaea	Unknown Kingdom	Euryarchaeota	Methanomicrobia	Methanosarcinales	Methanosarcinaceae	Methanosarcina	Methanosarcina mazei	Methanosarcina mazei Go1	1	1		TaxMP_MPAv1_OldWF_BGP_2_A.csv
	TaxMP_MPAv1_OldWF_BGP_2_A.csv		Archaea	Unknown Kingdom	Euryarchaeota	Unknown Class	Unknown Order	Unknown Family	Unknown Genus	Unknown Species	Unknown Subspecies	2	2		TaxMP_MPAv1_OldWF_BGP_2_A.csv
	TaxMP_MPAv1_OldWF_BGP_2_A.csv		Eukaryota	Metazoa	Chordata	Unknown Class	Unknown Order	Unknown Family	Unknown Genus	Unknown Species	Unknown Subspecies	1	3		TaxMP_MPAv1_OldWF_BGP_2_A.csv
	TaxMP_MPAv1_OldWF_BGP_2_A.csv		Archaea	Unknown Kingdom	Euryarchaeota	Methanomicrobia	Methanosarcinales	Methanosarcinaceae	Methanosarcina	Unknown Species	Unknown Subspecies	2	3		TaxMP_MPAv1_OldWF_BGP_2_A.csv
	TaxMP_MPAv1_OldWF_BGP_2_A.csv		Eukaryota	Viridiplantae	Streptophyta	Liliopsida	Poales	Poaceae	Unknown Genus	Unknown Species	Unknown Subspecies	2	1		TaxMP_MPAv1_OldWF_BGP_2_A.csv
	TaxMP_MPAv1_OldWF_BGP_2_B.csv		Unknown Superkingdom	Unknown Kingdom	Unknown Phylum	Unknown Class	Unknown Order	Unknown Family	Unknown Genus	Unknown Species	Unknown Subspecies	620	957		TaxMP_MPAv1_OldWF_BGP_2_B.csv
	TaxMP_MPAv1_OldWF_BGP_2_B.csv		Archaea	Unknown Kingdom	Euryarchaeota	Methanomicrobia	Methanosarcinales	Methanosarcinaceae	Methanosarcina	Methanosarcina barkeri	Methanosarcina barkeri str. Fusaro	1	1		TaxMP_MPAv1_OldWF_BGP_2_B.csv
	TaxMP_MPAv1_OldWF_BGP_2_B.csv		Eukaryota	Metazoa	Chordata	Mammalia	Unknown Order	Unknown Family	Unknown Genus	Unknown Species	Unknown Subspecies	19	27		TaxMP_MPAv1_OldWF_BGP_2_B.csv
	TaxMP_MPAv1_OldWF_BGP_2_B.csv		Eukaryota	Viridiplantae	Streptophyta	Unknown Class	Unknown Order	Unknown Family	Unknown Genus	Unknown Species	Unknown Subspecies	3	4		TaxMP_MPAv1_OldWF_BGP_2_B.csv
	TaxMP_MPAv1_OldWF_BGP_2_B.csv		Eukaryota	Metazoa	Chordata	Mammalia	Primates	Hominidae	Homo	Homo sapiens	Unknown Subspecies	1	1		TaxMP_MPAv1_OldWF_BGP_2_B.csv
	TaxMP_MPAv1_OldWF_BGP_2_B.csv		Bacteria	Unknown Kingdom	Proteobacteria	Unknown Class	Unknown Order	Unknown Family	Unknown Genus	Unknown Species	Unknown Subspecies	2	1		TaxMP_MPAv1_OldWF_BGP_2_B.csv
	TaxMP_MPAv1_OldWF_BGP_2_B.csv		Bacteria	Unknown Kingdom	Firmicutes	Clostridia	Thermoanaerobacterales	Thermoanaerobacteraceae	Thermoanaerobacter	Thermoanaerobacter brockii	Unknown Subspecies	2	3		TaxMP_MPAv1_OldWF_BGP_2_B.csv
	TaxMP_MPAv1_OldWF_BGP_2_B.csv		Archaea	Unknown Kingdom	Euryarchaeota	Methanomicrobia	Methanosarcinales	Methanosarcinaceae	Methanosarcina	Methanosarcina acetivorans	Methanosarcina acetivorans C2A	1	1		TaxMP_MPAv1_OldWF_BGP_2_B.csv
	TaxMP_MPAv1_OldWF_BGP_2_B.csv		Archaea	Unknown Kingdom	Euryarchaeota	Methanobacteria	Methanobacteriales	Unknown Family	Unknown Genus	Unknown Species	Unknown Subspecies	2	1		TaxMP_MPAv1_OldWF_BGP_2_B.csv
	TaxMP_MPAv1_OldWF_BGP_2_B.csv		Archaea	Unknown Kingdom	Euryarchaeota	Methanobacteria	Methanobacteriales	Methanobacteriaceae	Methanosphaera	Methanosphaera stadtmanae	Methanosphaera stadtmanae DSM 3091	1	2		TaxMP_MPAv1_OldWF_BGP_2_B.csv
	TaxMP_MPAv1_OldWF_BGP_2_B.csv		Archaea	Unknown Kingdom	Euryarchaeota	Methanomicrobia	Methanomicrobiales	Methanomicrobiaceae	Methanoculleus	Methanoculleus marisnigri	Methanoculleus marisnigri JR1	1	1		TaxMP_MPAv1_OldWF_BGP_2_B.csv
	TaxMP_MPAv1_OldWF_BGP_2_B.csv		Bacteria	Unknown Kingdom	Proteobacteria	Betaproteobacteria	Rhodocyclales	Rhodocyclaceae	Aromatoleum	Aromatoleum aromaticum	Aromatoleum aromaticum EbN1	1	1		TaxMP_MPAv1_OldWF_BGP_2_B.csv
	TaxMP_MPAv1_OldWF_BGP_2_B.csv		Eukaryota	Metazoa	Unknown Phylum	Unknown Class	Unknown Order	Unknown Family	Unknown Genus	Unknown Species	Unknown Subspecies	1	1		TaxMP_MPAv1_OldWF_BGP_2_B.csv
	TaxMP_MPAv1_OldWF_BGP_2_B.csv		Archaea	Unknown Kingdom	Euryarchaeota	Methanomicrobia	Methanosarcinales	Methanosarcinaceae	Methanosarcina	Methanosarcina mazei	Methanosarcina mazei Go1	1	1		TaxMP_MPAv1_OldWF_BGP_2_B.csv
	TaxMP_MPAv1_OldWF_BGP_2_B.csv		Archaea	Unknown Kingdom	Euryarchaeota	Methanomicrobia	Methanosarcinales	Methanosarcinaceae	Methanosarcina	Unknown Species	Unknown Subspecies	1	1		TaxMP_MPAv1_OldWF_BGP_2_B.csv
	TaxMP_MPAv1_OldWF_BGP_2_B.csv		Eukaryota	Viridiplantae	Streptophyta	Liliopsida	Unknown Order	Unknown Family	Unknown Genus	Unknown Species	Unknown Subspecies	1	1		TaxMP_MPAv1_OldWF_BGP_2_B.csv
	TaxMP_MPAv1_OldWF_BGP_2_B.csv		Eukaryota	Metazoa	Chordata	Unknown Class	Unknown Order	Unknown Family	Unknown Genus	Unknown Species	Unknown Subspecies	2	3		TaxMP_MPAv1_OldWF_BGP_2_B.csv
	TaxMP_MPAv1_OldWF_BGP_2_C.csv		Bacteria	Unknown Kingdom	Bacteroidetes	Unknown Class	Unknown Order	Unknown Family	Unknown Genus	Unknown Species	Unknown Subspecies	2	1		TaxMP_MPAv1_OldWF_BGP_2_C.csv
	TaxMP_MPAv1_OldWF_BGP_2_C.csv		Unknown Superkingdom	Unknown Kingdom	Unknown Phylum	Unknown Class	Unknown Order	Unknown Family	Unknown Genus	Unknown Species	Unknown Subspecies	483	680		TaxMP_MPAv1_OldWF_BGP_2_C.csv
	TaxMP_MPAv1_OldWF_BGP_2_C.csv		Archaea	Unknown Kingdom	Euryarchaeota	Methanomicrobia	Methanosarcinales	Methanosarcinaceae	Methanosarcina	Methanosarcina barkeri	Methanosarcina barkeri str. Fusaro	1	1		TaxMP_MPAv1_OldWF_BGP_2_C.csv
	TaxMP_MPAv1_OldWF_BGP_2_C.csv		Eukaryota	Metazoa	Chordata	Mammalia	Unknown Order	Unknown Family	Unknown Genus	Unknown Species	Unknown Subspecies	16	33		TaxMP_MPAv1_OldWF_BGP_2_C.csv
	TaxMP_MPAv1_OldWF_BGP_2_C.csv		Bacteria	Unknown Kingdom	Proteobacteria	Betaproteobacteria	Rhodocyclales	Rhodocyclaceae	Aromatoleum	Aromatoleum aromaticum	Aromatoleum aromaticum EbN1	1	1		TaxMP_MPAv1_OldWF_BGP_2_C.csv
	TaxMP_MPAv1_OldWF_BGP_2_C.csv		Eukaryota	Viridiplantae	Streptophyta	Unknown Class	Unknown Order	Unknown Family	Unknown Genus	Unknown Species	Unknown Subspecies	3	5		TaxMP_MPAv1_OldWF_BGP_2_C.csv
	TaxMP_MPAv1_OldWF_BGP_2_C.csv		Eukaryota	Metazoa	Chordata	Mammalia	Primates	Hominidae	Homo	Homo sapiens	Unknown Subspecies	4	5		TaxMP_MPAv1_OldWF_BGP_2_C.csv
	TaxMP_MPAv1_OldWF_BGP_2_C.csv		Eukaryota	Metazoa	Unknown Phylum	Unknown Class	Unknown Order	Unknown Family	Unknown Genus	Unknown Species	Unknown Subspecies	1	2		TaxMP_MPAv1_OldWF_BGP_2_C.csv
	TaxMP_MPAv1_OldWF_BGP_2_C.csv		Archaea	Unknown Kingdom	Euryarchaeota	Methanomicrobia	Methanosarcinales	Methanosarcinaceae	Methanosarcina	Methanosarcina acetivorans	Methanosarcina acetivorans C2A	2	4		TaxMP_MPAv1_OldWF_BGP_2_C.csv
	TaxMP_MPAv1_OldWF_BGP_2_C.csv		Archaea	Unknown Kingdom	Euryarchaeota	Methanobacteria	Methanobacteriales	Unknown Family	Unknown Genus	Unknown Species	Unknown Subspecies	2	1		TaxMP_MPAv1_OldWF_BGP_2_C.csv
	TaxMP_MPAv1_OldWF_BGP_2_C.csv		Eukaryota	Viridiplantae	Chlorophyta	Chlorophyceae	Chlamydomonadales	Chlamydomonadaceae	Chlamydomonas	Chlamydomonas reinhardtii	Unknown Subspecies	1	1		TaxMP_MPAv1_OldWF_BGP_2_C.csv
	TaxMP_MPAv1_OldWF_BGP_2_C.csv		Eukaryota	Viridiplantae	Streptophyta	Liliopsida	Poales	Poaceae	Unknown Genus	Unknown Species	Unknown Subspecies	2	1		TaxMP_MPAv1_OldWF_BGP_2_C.csv
	TaxMP_MPAv1_OldWF_BGP_3_A.csv		Unknown Superkingdom	Unknown Kingdom	Unknown Phylum	Unknown Class	Unknown Order	Unknown Family	Unknown Genus	Unknown Species	Unknown Subspecies	890	1351		TaxMP_MPAv1_OldWF_BGP_3_A.csv
	TaxMP_MPAv1_OldWF_BGP_3_A.csv		Bacteria	Unknown Kingdom	Chloroflexi	Chloroflexi	Herpetosiphonales	Herpetosiphonaceae	Herpetosiphon	Herpetosiphon aurantiacus	Unknown Subspecies	1	1		TaxMP_MPAv1_OldWF_BGP_3_A.csv
	TaxMP_MPAv1_OldWF_BGP_3_A.csv		Eukaryota	Metazoa	Chordata	Mammalia	Unknown Order	Unknown Family	Unknown Genus	Unknown Species	Unknown Subspecies	16	20		TaxMP_MPAv1_OldWF_BGP_3_A.csv
	TaxMP_MPAv1_OldWF_BGP_3_A.csv		Bacteria	Unknown Kingdom	Unknown Phylum	Unknown Class	Unknown Order	Unknown Family	Unknown Genus	Unknown Species	Unknown Subspecies	3	4		TaxMP_MPAv1_OldWF_BGP_3_A.csv
	TaxMP_MPAv1_OldWF_BGP_3_A.csv		Eukaryota	Viridiplantae	Streptophyta	Unknown Class	Unknown Order	Unknown Family	Unknown Genus	Unknown Species	Unknown Subspecies	5	6		TaxMP_MPAv1_OldWF_BGP_3_A.csv
	TaxMP_MPAv1_OldWF_BGP_3_A.csv		Eukaryota	Fungi	Ascomycota	Eurotiomycetes	Eurotiales	Trichocomaceae	Neosartorya	Neosartorya fischeri	Neosartorya fischeri NRRL 181	1	1		TaxMP_MPAv1_OldWF_BGP_3_A.csv
	TaxMP_MPAv1_OldWF_BGP_3_A.csv		Eukaryota	Viridiplantae	Streptophyta	Liliopsida	Poales	Poaceae	Oryza	Oryza sativa	Oryza sativa Japonica Group	1	1		TaxMP_MPAv1_OldWF_BGP_3_A.csv
	TaxMP_MPAv1_OldWF_BGP_3_A.csv		Eukaryota	Viridiplantae	Chlorophyta	Chlorophyceae	Chlamydomonadales	Chlamydomonadaceae	Chlamydomonas	Chlamydomonas reinhardtii	Unknown Subspecies	1	1		TaxMP_MPAv1_OldWF_BGP_3_A.csv
	TaxMP_MPAv1_OldWF_BGP_3_A.csv		Eukaryota	Viridiplantae	Streptophyta	Unknown Class	Brassicales	Brassicaceae	Crucihimalaya	Crucihimalaya wallichii	Unknown Subspecies	1	1		TaxMP_MPAv1_OldWF_BGP_3_A.csv
	TaxMP_MPAv1_OldWF_BGP_3_A.csv		Bacteria	Unknown Kingdom	Proteobacteria	Deltaproteobacteria	Desulfovibrionales	Desulfovibrionaceae	Desulfovibrio	Desulfovibrio desulfuricans subsp. desulfuricans str. ATCC 27774	Desulfovibrio desulfuricans subsp. desulfuricans	1	1		TaxMP_MPAv1_OldWF_BGP_3_A.csv
	TaxMP_MPAv1_OldWF_BGP_3_A.csv		Bacteria	Unknown Kingdom	Proteobacteria	Alphaproteobacteria	Unknown Order	Unknown Family	Unknown Genus	Unknown Species	Unknown Subspecies	2	1		TaxMP_MPAv1_OldWF_BGP_3_A.csv
	TaxMP_MPAv1_OldWF_BGP_3_A.csv		Eukaryota	Metazoa	Chordata	Mammalia	Unknown Order	Bovidae	Ovis	Ovis aries	Unknown Subspecies	1	1		TaxMP_MPAv1_OldWF_BGP_3_A.csv
	TaxMP_MPAv1_OldWF_BGP_3_A.csv		Archaea	Unknown Kingdom	Euryarchaeota	Methanomicrobia	Unknown Order	Unknown Family	Unknown Genus	Unknown Species	Unknown Subspecies	2	3		TaxMP_MPAv1_OldWF_BGP_3_A.csv
	TaxMP_MPAv1_OldWF_BGP_3_A.csv		Eukaryota	Metazoa	Unknown Phylum	Unknown Class	Unknown Order	Unknown Family	Unknown Genus	Unknown Species	Unknown Subspecies	1	1		TaxMP_MPAv1_OldWF_BGP_3_A.csv
	TaxMP_MPAv1_OldWF_BGP_3_A.csv		Archaea	Unknown Kingdom	Euryarchaeota	Unknown Class	Unknown Order	Unknown Family	Unknown Genus	Unknown Species	Unknown Subspecies	2	1		TaxMP_MPAv1_OldWF_BGP_3_A.csv
	TaxMP_MPAv1_OldWF_BGP_3_A.csv		Eukaryota	Metazoa	Chordata	Unknown Class	Unknown Order	Unknown Family	Unknown Genus	Unknown Species	Unknown Subspecies	2	2		TaxMP_MPAv1_OldWF_BGP_3_A.csv
	TaxMP_MPAv1_OldWF_BGP_3_A.csv		Eukaryota	Viridiplantae	Streptophyta	Liliopsida	Poales	Poaceae	Unknown Genus	Unknown Species	Unknown Subspecies	1	2		TaxMP_MPAv1_OldWF_BGP_3_A.csv
	TaxMP_MPAv1_OldWF_BGP_3_B.csv		Unknown Superkingdom	Unknown Kingdom	Unknown Phylum	Unknown Class	Unknown Order	Unknown Family	Unknown Genus	Unknown Species	Unknown Subspecies	892	1371		TaxMP_MPAv1_OldWF_BGP_3_B.csv
	TaxMP_MPAv1_OldWF_BGP_3_B.csv		Bacteria	Unknown Kingdom	Chloroflexi	Chloroflexi	Herpetosiphonales	Herpetosiphonaceae	Herpetosiphon	Herpetosiphon aurantiacus	Unknown Subspecies	1	1		TaxMP_MPAv1_OldWF_BGP_3_B.csv
	TaxMP_MPAv1_OldWF_BGP_3_B.csv		Eukaryota	Viridiplantae	Streptophyta	Liliopsida	Poales	Poaceae	Hordeum	Hordeum vulgare	Unknown Subspecies	1	1		TaxMP_MPAv1_OldWF_BGP_3_B.csv
	TaxMP_MPAv1_OldWF_BGP_3_B.csv		Archaea	Unknown Kingdom	Euryarchaeota	Methanomicrobia	Methanosarcinales	Methanosarcinaceae	Methanosarcina	Methanosarcina barkeri	Methanosarcina barkeri str. Fusaro	2	2		TaxMP_MPAv1_OldWF_BGP_3_B.csv
	TaxMP_MPAv1_OldWF_BGP_3_B.csv		Eukaryota	Metazoa	Chordata	Mammalia	Unknown Order	Unknown Family	Unknown Genus	Unknown Species	Unknown Subspecies	14	18		TaxMP_MPAv1_OldWF_BGP_3_B.csv
	TaxMP_MPAv1_OldWF_BGP_3_B.csv		Archaea	Unknown Kingdom	Euryarchaeota	Methanomicrobia	Methanosarcinales	Methanosarcinaceae	Methanosarcina	Methanosarcina thermophila	Unknown Subspecies	1	1		TaxMP_MPAv1_OldWF_BGP_3_B.csv
	TaxMP_MPAv1_OldWF_BGP_3_B.csv		Bacteria	Unknown Kingdom	Unknown Phylum	Unknown Class	Unknown Order	Unknown Family	Unknown Genus	Unknown Species	Unknown Subspecies	2	1		TaxMP_MPAv1_OldWF_BGP_3_B.csv
	TaxMP_MPAv1_OldWF_BGP_3_B.csv		Eukaryota	Viridiplantae	Streptophyta	Unknown Class	Unknown Order	Unknown Family	Unknown Genus	Unknown Species	Unknown Subspecies	7	8		TaxMP_MPAv1_OldWF_BGP_3_B.csv
	TaxMP_MPAv1_OldWF_BGP_3_B.csv		Eukaryota	Metazoa	Chordata	Mammalia	Primates	Hominidae	Homo	Homo sapiens	Unknown Subspecies	1	1		TaxMP_MPAv1_OldWF_BGP_3_B.csv
	TaxMP_MPAv1_OldWF_BGP_3_B.csv		Bacteria	Unknown Kingdom	Proteobacteria	Unknown Class	Unknown Order	Unknown Family	Unknown Genus	Unknown Species	Unknown Subspecies	2	1		TaxMP_MPAv1_OldWF_BGP_3_B.csv
	TaxMP_MPAv1_OldWF_BGP_3_B.csv		Bacteria	Unknown Kingdom	Cyanobacteria	Unknown Class	Chroococcales	Unknown Family	Synechococcus	Unknown Species	Unknown Subspecies	1	1		TaxMP_MPAv1_OldWF_BGP_3_B.csv
	TaxMP_MPAv1_OldWF_BGP_3_B.csv		Eukaryota	Viridiplantae	Streptophyta	Unknown Class	Solanales	Solanaceae	Solanum	Unknown Species	Unknown Subspecies	1	1		TaxMP_MPAv1_OldWF_BGP_3_B.csv
	TaxMP_MPAv1_OldWF_BGP_3_B.csv		Bacteria	Unknown Kingdom	Bacteroidetes	Unknown Class	Unknown Order	Unknown Family	Unknown Genus	Unknown Species	Unknown Subspecies	2	1		TaxMP_MPAv1_OldWF_BGP_3_B.csv
	TaxMP_MPAv1_OldWF_BGP_3_B.csv		Eukaryota	Unknown Kingdom	Unknown Phylum	Unknown Class	Dictyosteliida	Unknown Family	Dictyostelium	Dictyostelium discoideum	Unknown Subspecies	1	1		TaxMP_MPAv1_OldWF_BGP_3_B.csv
	TaxMP_MPAv1_OldWF_BGP_3_B.csv		Bacteria	Unknown Kingdom	Proteobacteria	Betaproteobacteria	Rhodocyclales	Rhodocyclaceae	Aromatoleum	Aromatoleum aromaticum	Aromatoleum aromaticum EbN1	1	1		TaxMP_MPAv1_OldWF_BGP_3_B.csv
	TaxMP_MPAv1_OldWF_BGP_3_B.csv		Eukaryota	Metazoa	Unknown Phylum	Unknown Class	Unknown Order	Unknown Family	Unknown Genus	Unknown Species	Unknown Subspecies	1	2		TaxMP_MPAv1_OldWF_BGP_3_B.csv
	TaxMP_MPAv1_OldWF_BGP_3_B.csv		Archaea	Unknown Kingdom	Euryarchaeota	Methanomicrobia	Methanosarcinales	Methanosarcinaceae	Methanosarcina	Methanosarcina mazei	Methanosarcina mazei Go1	1	1		TaxMP_MPAv1_OldWF_BGP_3_B.csv
	TaxMP_MPAv1_OldWF_BGP_3_B.csv		Bacteria	Unknown Kingdom	Proteobacteria	Betaproteobacteria	Burkholderiales	Alcaligenaceae	Bordetella	Bordetella bronchiseptica	Bordetella bronchiseptica RB50	1	1		TaxMP_MPAv1_OldWF_BGP_3_B.csv
	TaxMP_MPAv1_OldWF_BGP_3_B.csv		Bacteria	Unknown Kingdom	Tenericutes	Mollicutes	Mycoplasmatales	Mycoplasmataceae	Mycoplasma	Mycoplasma penetrans	Mycoplasma penetrans HF-2	1	1		TaxMP_MPAv1_OldWF_BGP_3_B.csv
	TaxMP_MPAv1_OldWF_BGP_3_B.csv		Bacteria	Unknown Kingdom	Cyanobacteria	Unknown Class	Unknown Order	Unknown Family	Unknown Genus	Unknown Species	Unknown Subspecies	3	2		TaxMP_MPAv1_OldWF_BGP_3_B.csv
	TaxMP_MPAv1_OldWF_BGP_3_B.csv		Bacteria	Unknown Kingdom	Firmicutes	Bacilli	Lactobacillales	Streptococcaceae	Streptococcus	Streptococcus pneumoniae	Streptococcus pneumoniae R6	1	1		TaxMP_MPAv1_OldWF_BGP_3_B.csv
	TaxMP_MPAv1_OldWF_BGP_3_B.csv		Archaea	Unknown Kingdom	Euryarchaeota	Methanomicrobia	Methanosarcinales	Methanosarcinaceae	Methanosarcina	Unknown Species	Unknown Subspecies	1	3		TaxMP_MPAv1_OldWF_BGP_3_B.csv
	TaxMP_MPAv1_OldWF_BGP_3_C.csv		Unknown Superkingdom	Unknown Kingdom	Unknown Phylum	Unknown Class	Unknown Order	Unknown Family	Unknown Genus	Unknown Species	Unknown Subspecies	759	1166		TaxMP_MPAv1_OldWF_BGP_3_C.csv
	TaxMP_MPAv1_OldWF_BGP_3_C.csv		Archaea	Unknown Kingdom	Euryarchaeota	Methanomicrobia	Methanosarcinales	Methanosarcinaceae	Methanosarcina	Methanosarcina barkeri	Methanosarcina barkeri str. Fusaro	2	2		TaxMP_MPAv1_OldWF_BGP_3_C.csv
	TaxMP_MPAv1_OldWF_BGP_3_C.csv		Eukaryota	Metazoa	Chordata	Mammalia	Unknown Order	Unknown Family	Unknown Genus	Unknown Species	Unknown Subspecies	10	10		TaxMP_MPAv1_OldWF_BGP_3_C.csv
	TaxMP_MPAv1_OldWF_BGP_3_C.csv		Bacteria	Unknown Kingdom	Unknown Phylum	Unknown Class	Unknown Order	Unknown Family	Unknown Genus	Unknown Species	Unknown Subspecies	1	1		TaxMP_MPAv1_OldWF_BGP_3_C.csv
	TaxMP_MPAv1_OldWF_BGP_3_C.csv		Eukaryota	Viridiplantae	Streptophyta	Unknown Class	Unknown Order	Unknown Family	Unknown Genus	Unknown Species	Unknown Subspecies	7	8		TaxMP_MPAv1_OldWF_BGP_3_C.csv
	TaxMP_MPAv1_OldWF_BGP_3_C.csv		Eukaryota	Viridiplantae	Streptophyta	Unknown Class	Solanales	Solanaceae	Solanum	Unknown Species	Unknown Subspecies	1	1		TaxMP_MPAv1_OldWF_BGP_3_C.csv
	TaxMP_MPAv1_OldWF_BGP_3_C.csv		Archaea	Unknown Kingdom	Euryarchaeota	Methanomicrobia	Methanosarcinales	Methanosarcinaceae	Methanosarcina	Methanosarcina acetivorans	Methanosarcina acetivorans C2A	1	2		TaxMP_MPAv1_OldWF_BGP_3_C.csv
	TaxMP_MPAv1_OldWF_BGP_3_C.csv		Eukaryota	Viridiplantae	Streptophyta	Liliopsida	Poales	Poaceae	Oryza	Unknown Species	Unknown Subspecies	1	2		TaxMP_MPAv1_OldWF_BGP_3_C.csv
	TaxMP_MPAv1_OldWF_BGP_3_C.csv		Bacteria	Unknown Kingdom	Bacteroidetes	Unknown Class	Unknown Order	Unknown Family	Unknown Genus	Unknown Species	Unknown Subspecies	3	1		TaxMP_MPAv1_OldWF_BGP_3_C.csv
	TaxMP_MPAv1_OldWF_BGP_3_C.csv		Bacteria	Unknown Kingdom	Proteobacteria	Alphaproteobacteria	Rhizobiales	Bradyrhizobiaceae	Bradyrhizobium	Bradyrhizobium sp. ORS 278	Unknown Subspecies	1	1		TaxMP_MPAv1_OldWF_BGP_3_C.csv
	TaxMP_MPAv1_OldWF_BGP_3_C.csv		Eukaryota	Viridiplantae	Streptophyta	Unknown Class	Magnoliales	Magnoliaceae	Liriodendron	Liriodendron tulipifera	Unknown Subspecies	1	1		TaxMP_MPAv1_OldWF_BGP_3_C.csv
	TaxMP_MPAv1_OldWF_BGP_3_C.csv		Eukaryota	Metazoa	Unknown Phylum	Unknown Class	Unknown Order	Unknown Family	Unknown Genus	Unknown Species	Unknown Subspecies	1	1		TaxMP_MPAv1_OldWF_BGP_3_C.csv
	TaxMP_MPAv1_OldWF_BGP_3_C.csv		Eukaryota	Metazoa	Chordata	Mammalia	Unknown Order	Bovidae	Bos	Bos taurus	Unknown Subspecies	1	1		TaxMP_MPAv1_OldWF_BGP_3_C.csv
	TaxMP_MPAv1_OldWF_BGP_3_C.csv		Archaea	Unknown Kingdom	Euryarchaeota	Methanomicrobia	Methanosarcinales	Methanosarcinaceae	Methanosarcina	Methanosarcina mazei	Methanosarcina mazei Go1	1	1		TaxMP_MPAv1_OldWF_BGP_3_C.csv
	TaxMP_MPAv1_OldWF_BGP_3_C.csv		Archaea	Unknown Kingdom	Euryarchaeota	Unknown Class	Unknown Order	Unknown Family	Unknown Genus	Unknown Species	Unknown Subspecies	2	1		TaxMP_MPAv1_OldWF_BGP_3_C.csv
	TaxMP_MPAv1_OldWF_BGP_3_C.csv		Archaea	Unknown Kingdom	Euryarchaeota	Methanomicrobia	Methanosarcinales	Methanosarcinaceae	Methanosarcina	Unknown Species	Unknown Subspecies	2	2		TaxMP_MPAv1_OldWF_BGP_3_C.csv
	TaxMP_MPAv1_OldWF_Hgut_1_A.csv		Bacteria	Unknown Kingdom	Bacteroidetes	Bacteroidia	Bacteroidales	Bacteroidaceae	Bacteroides	Bacteroides vulgatus	Bacteroides vulgatus ATCC 8482	1	1		TaxMP_MPAv1_OldWF_Hgut_1_A.csv
	TaxMP_MPAv1_OldWF_Hgut_1_A.csv		Unknown Superkingdom	Unknown Kingdom	Unknown Phylum	Unknown Class	Unknown Order	Unknown Family	Unknown Genus	Unknown Species	Unknown Subspecies	486	654		TaxMP_MPAv1_OldWF_Hgut_1_A.csv
	TaxMP_MPAv1_OldWF_Hgut_1_A.csv		Bacteria	Unknown Kingdom	Bacteroidetes	Bacteroidia	Bacteroidales	Porphyromonadaceae	Parabacteroides	Parabacteroides distasonis	Parabacteroides distasonis ATCC 8503	1	1		TaxMP_MPAv1_OldWF_Hgut_1_A.csv
	TaxMP_MPAv1_OldWF_Hgut_1_A.csv		Eukaryota	Metazoa	Chordata	Mammalia	Lagomorpha	Leporidae	Oryctolagus	Oryctolagus cuniculus	Unknown Subspecies	1	1		TaxMP_MPAv1_OldWF_Hgut_1_A.csv
	TaxMP_MPAv1_OldWF_Hgut_1_A.csv		Bacteria	Unknown Kingdom	Unknown Phylum	Unknown Class	Unknown Order	Unknown Family	Unknown Genus	Unknown Species	Unknown Subspecies	5	4		TaxMP_MPAv1_OldWF_Hgut_1_A.csv
	TaxMP_MPAv1_OldWF_Hgut_1_A.csv		Bacteria	Unknown Kingdom	Firmicutes	Bacilli	Bacillales	Bacillaceae	Unknown Genus	Unknown Species	Unknown Subspecies	1	1		TaxMP_MPAv1_OldWF_Hgut_1_A.csv
	TaxMP_MPAv1_OldWF_Hgut_1_A.csv		Bacteria	Unknown Kingdom	Firmicutes	Clostridia	Clostridiales	Peptococcaceae	Desulfitobacterium	Desulfitobacterium hafniense	Desulfitobacterium hafniense Y51	1	1		TaxMP_MPAv1_OldWF_Hgut_1_A.csv
	TaxMP_MPAv1_OldWF_Hgut_1_A.csv		Eukaryota	Metazoa	Chordata	Mammalia	Primates	Hominidae	Homo	Homo sapiens	Unknown Subspecies	11	17		TaxMP_MPAv1_OldWF_Hgut_1_A.csv
	TaxMP_MPAv1_OldWF_Hgut_1_A.csv		Eukaryota	Metazoa	Chordata	Aves	Galliformes	Phasianidae	Gallus	Gallus gallus	Unknown Subspecies	2	3		TaxMP_MPAv1_OldWF_Hgut_1_A.csv
	TaxMP_MPAv1_OldWF_Hgut_1_A.csv		Eukaryota	Unknown Kingdom	Unknown Phylum	Unknown Class	Unknown Order	Unknown Family	Unknown Genus	Unknown Species	Unknown Subspecies	2	2		TaxMP_MPAv1_OldWF_Hgut_1_A.csv
	TaxMP_MPAv1_OldWF_Hgut_1_A.csv		Eukaryota	Metazoa	Chordata	Mammalia	Primates	Cebidae	Callithrix	Callithrix jacchus	Unknown Subspecies	1	1		TaxMP_MPAv1_OldWF_Hgut_1_A.csv
	TaxMP_MPAv1_OldWF_Hgut_1_A.csv		Eukaryota	Viridiplantae	Streptophyta	Unknown Class	Cucurbitales	Cucurbitaceae	Cucurbita	Cucurbita maxima	Unknown Subspecies	3	5		TaxMP_MPAv1_OldWF_Hgut_1_A.csv
	TaxMP_MPAv1_OldWF_Hgut_1_A.csv		Eukaryota	Viridiplantae	Streptophyta	Unknown Class	Solanales	Solanaceae	Solanum	Solanum tuberosum	Unknown Subspecies	3	5		TaxMP_MPAv1_OldWF_Hgut_1_A.csv
	TaxMP_MPAv1_OldWF_Hgut_1_A.csv		Eukaryota	Viridiplantae	Streptophyta	Liliopsida	Poales	Poaceae	Avena	Avena sativa	Unknown Subspecies	2	4		TaxMP_MPAv1_OldWF_Hgut_1_A.csv
	TaxMP_MPAv1_OldWF_Hgut_1_A.csv		Bacteria	Unknown Kingdom	Firmicutes	Unknown Class	Unknown Order	Unknown Family	Unknown Genus	Unknown Species	Unknown Subspecies	2	1		TaxMP_MPAv1_OldWF_Hgut_1_A.csv
	TaxMP_MPAv1_OldWF_Hgut_1_A.csv		Bacteria	Unknown Kingdom	Proteobacteria	Betaproteobacteria	Burkholderiales	Comamonadaceae	Albidiferax	Albidiferax ferrireducens	Rhodoferax ferrireducens T118	1	1		TaxMP_MPAv1_OldWF_Hgut_1_A.csv
	TaxMP_MPAv1_OldWF_Hgut_1_A.csv		Eukaryota	Metazoa	Chordata	Unknown Class	Unknown Order	Unknown Family	Unknown Genus	Unknown Species	Unknown Subspecies	2	1		TaxMP_MPAv1_OldWF_Hgut_1_A.csv
	TaxMP_MPAv1_OldWF_Hgut_1_A.csv		Eukaryota	Metazoa	Chordata	Mammalia	Unknown Order	Unknown Family	Unknown Genus	Unknown Species	Unknown Subspecies	4	7		TaxMP_MPAv1_OldWF_Hgut_1_A.csv
	TaxMP_MPAv1_OldWF_Hgut_1_A.csv		Eukaryota	Metazoa	Chordata	Mammalia	Primates	Unknown Family	Unknown Genus	Unknown Species	Unknown Subspecies	2	2		TaxMP_MPAv1_OldWF_Hgut_1_A.csv
	TaxMP_MPAv1_OldWF_Hgut_1_A.csv		Eukaryota	Metazoa	Chordata	Amphibia	Anura	Pipidae	Xenopus	Xenopus laevis	Unknown Subspecies	1	2		TaxMP_MPAv1_OldWF_Hgut_1_A.csv
	TaxMP_MPAv1_OldWF_Hgut_1_A.csv		Bacteria	Unknown Kingdom	Firmicutes	Bacilli	Bacillales	Unknown Family	Unknown Genus	Unknown Species	Unknown Subspecies	1	2		TaxMP_MPAv1_OldWF_Hgut_1_A.csv
	TaxMP_MPAv1_OldWF_Hgut_1_A.csv		Eukaryota	Metazoa	Chordata	Mammalia	Rodentia	Muridae	Mus	Mus musculus	Unknown Subspecies	2	3		TaxMP_MPAv1_OldWF_Hgut_1_A.csv
	TaxMP_MPAv1_OldWF_Hgut_1_A.csv		Bacteria	Unknown Kingdom	Deinococcus-Thermus	Deinococci	Thermales	Thermaceae	Thermus	Thermus thermophilus	Thermus thermophilus HB8	1	2		TaxMP_MPAv1_OldWF_Hgut_1_A.csv
	TaxMP_MPAv1_OldWF_Hgut_1_A.csv		Eukaryota	Fungi	Ascomycota	Saccharomycetes	Saccharomycetales	Saccharomycetaceae	Saccharomyces	Saccharomyces cerevisiae	Saccharomyces cerevisiae S288c	4	4		TaxMP_MPAv1_OldWF_Hgut_1_A.csv
	TaxMP_MPAv1_OldWF_Hgut_1_A.csv		Bacteria	Unknown Kingdom	Firmicutes	Bacilli	Bacillales	Bacillaceae	Bacillus	Bacillus cereus	Unknown Subspecies	1	2		TaxMP_MPAv1_OldWF_Hgut_1_A.csv
	TaxMP_MPAv1_OldWF_Hgut_1_A.csv		Eukaryota	Viridiplantae	Streptophyta	Unknown Class	Rosales	Rosaceae	Prunus	Prunus avium	Unknown Subspecies	1	1		TaxMP_MPAv1_OldWF_Hgut_1_A.csv
	TaxMP_MPAv1_OldWF_Hgut_1_A.csv		Bacteria	Unknown Kingdom	Firmicutes	Clostridia	Clostridiales	Clostridiaceae	Clostridium	Clostridium acetobutylicum	Clostridium acetobutylicum ATCC 824	1	2		TaxMP_MPAv1_OldWF_Hgut_1_A.csv
	TaxMP_MPAv1_OldWF_Hgut_1_A.csv		Eukaryota	Metazoa	Unknown Phylum	Unknown Class	Unknown Order	Unknown Family	Unknown Genus	Unknown Species	Unknown Subspecies	2	3		TaxMP_MPAv1_OldWF_Hgut_1_A.csv
	TaxMP_MPAv1_OldWF_Hgut_1_B.csv		Unknown Superkingdom	Unknown Kingdom	Unknown Phylum	Unknown Class	Unknown Order	Unknown Family	Unknown Genus	Unknown Species	Unknown Subspecies	142	195		TaxMP_MPAv1_OldWF_Hgut_1_B.csv
	TaxMP_MPAv1_OldWF_Hgut_1_B.csv		Eukaryota	Viridiplantae	Streptophyta	Unknown Class	Solanales	Solanaceae	Solanum	Solanum tuberosum	Unknown Subspecies	1	1		TaxMP_MPAv1_OldWF_Hgut_1_B.csv
	TaxMP_MPAv1_OldWF_Hgut_1_B.csv		Eukaryota	Viridiplantae	Streptophyta	Liliopsida	Poales	Poaceae	Avena	Avena sativa	Unknown Subspecies	2	2		TaxMP_MPAv1_OldWF_Hgut_1_B.csv
	TaxMP_MPAv1_OldWF_Hgut_1_B.csv		Eukaryota	Metazoa	Chordata	Mammalia	Unknown Order	Unknown Family	Unknown Genus	Unknown Species	Unknown Subspecies	2	1		TaxMP_MPAv1_OldWF_Hgut_1_B.csv
	TaxMP_MPAv1_OldWF_Hgut_1_B.csv		Eukaryota	Fungi	Ascomycota	Eurotiomycetes	Eurotiales	Trichocomaceae	Aspergillus	Aspergillus oryzae	Aspergillus oryzae RIB40	1	2		TaxMP_MPAv1_OldWF_Hgut_1_B.csv
	TaxMP_MPAv1_OldWF_Hgut_1_B.csv		Eukaryota	Metazoa	Chordata	Mammalia	Primates	Hominidae	Homo	Homo sapiens	Unknown Subspecies	3	4		TaxMP_MPAv1_OldWF_Hgut_1_B.csv
	TaxMP_MPAv1_OldWF_Hgut_1_B.csv		Eukaryota	Metazoa	Chordata	Aves	Galliformes	Phasianidae	Gallus	Gallus gallus	Unknown Subspecies	1	2		TaxMP_MPAv1_OldWF_Hgut_1_B.csv
	TaxMP_MPAv1_OldWF_Hgut_1_B.csv		Eukaryota	Viridiplantae	Streptophyta	Unknown Class	Cucurbitales	Cucurbitaceae	Cucurbita	Cucurbita maxima	Unknown Subspecies	1	1		TaxMP_MPAv1_OldWF_Hgut_1_B.csv
	TaxMP_MPAv1_OldWF_Hgut_1_B.csv		Eukaryota	Metazoa	Chordata	Mammalia	Primates	Cercopithecidae	Chlorocebus	Chlorocebus aethiops	Unknown Subspecies	1	1		TaxMP_MPAv1_OldWF_Hgut_1_B.csv
	TaxMP_MPAv1_OldWF_Hgut_1_B.csv		Eukaryota	Metazoa	Chordata	Unknown Class	Unknown Order	Unknown Family	Unknown Genus	Unknown Species	Unknown Subspecies	2	2		TaxMP_MPAv1_OldWF_Hgut_1_B.csv
	TaxMP_MPAv1_OldWF_Hgut_1_B.csv		Eukaryota	Fungi	Unknown Phylum	Unknown Class	Unknown Order	Unknown Family	Unknown Genus	Unknown Species	Unknown Subspecies	2	1		TaxMP_MPAv1_OldWF_Hgut_1_B.csv
	TaxMP_MPAv1_OldWF_Hgut_1_C.csv		Bacteria	Unknown Kingdom	Bacteroidetes	Bacteroidia	Bacteroidales	Bacteroidaceae	Bacteroides	Bacteroides vulgatus	Bacteroides vulgatus ATCC 8482	1	1		TaxMP_MPAv1_OldWF_Hgut_1_C.csv
	TaxMP_MPAv1_OldWF_Hgut_1_C.csv		Unknown Superkingdom	Unknown Kingdom	Unknown Phylum	Unknown Class	Unknown Order	Unknown Family	Unknown Genus	Unknown Species	Unknown Subspecies	387	604		TaxMP_MPAv1_OldWF_Hgut_1_C.csv
	TaxMP_MPAv1_OldWF_Hgut_1_C.csv		Eukaryota	Metazoa	Chordata	Mammalia	Primates	Hominidae	Pongo	Pongo abelii	Unknown Subspecies	1	1		TaxMP_MPAv1_OldWF_Hgut_1_C.csv
	TaxMP_MPAv1_OldWF_Hgut_1_C.csv		Eukaryota	Metazoa	Chordata	Mammalia	Unknown Order	Unknown Family	Unknown Genus	Unknown Species	Unknown Subspecies	8	11		TaxMP_MPAv1_OldWF_Hgut_1_C.csv
	TaxMP_MPAv1_OldWF_Hgut_1_C.csv		Eukaryota	Metazoa	Chordata	Amphibia	Anura	Pipidae	Xenopus	Xenopus laevis	Unknown Subspecies	1	1		TaxMP_MPAv1_OldWF_Hgut_1_C.csv
	TaxMP_MPAv1_OldWF_Hgut_1_C.csv		Eukaryota	Metazoa	Chordata	Mammalia	Rodentia	Muridae	Rattus	Rattus norvegicus	Unknown Subspecies	1	1		TaxMP_MPAv1_OldWF_Hgut_1_C.csv
	TaxMP_MPAv1_OldWF_Hgut_1_C.csv		Eukaryota	Metazoa	Chordata	Mammalia	Primates	Hominidae	Homo	Homo sapiens	Unknown Subspecies	16	24		TaxMP_MPAv1_OldWF_Hgut_1_C.csv
	TaxMP_MPAv1_OldWF_Hgut_1_C.csv		Eukaryota	Metazoa	Chordata	Aves	Galliformes	Phasianidae	Gallus	Gallus gallus	Unknown Subspecies	1	2		TaxMP_MPAv1_OldWF_Hgut_1_C.csv
	TaxMP_MPAv1_OldWF_Hgut_1_C.csv		Eukaryota	Unknown Kingdom	Unknown Phylum	Unknown Class	Unknown Order	Unknown Family	Unknown Genus	Unknown Species	Unknown Subspecies	5	5		TaxMP_MPAv1_OldWF_Hgut_1_C.csv
	TaxMP_MPAv1_OldWF_Hgut_1_C.csv		Bacteria	Unknown Kingdom	Firmicutes	Clostridia	Clostridiales	Clostridiaceae	Clostridium	Clostridium symbiosum	Unknown Subspecies	1	1		TaxMP_MPAv1_OldWF_Hgut_1_C.csv
	TaxMP_MPAv1_OldWF_Hgut_1_C.csv		Eukaryota	Metazoa	Chordata	Mammalia	Rodentia	Muridae	Mus	Mus musculus	Unknown Subspecies	4	4		TaxMP_MPAv1_OldWF_Hgut_1_C.csv
	TaxMP_MPAv1_OldWF_Hgut_1_C.csv		Bacteria	Unknown Kingdom	Bacteroidetes	Bacteroidia	Bacteroidales	Bacteroidaceae	Bacteroides	Bacteroides fragilis	Bacteroides fragilis NCTC 9343	1	1		TaxMP_MPAv1_OldWF_Hgut_1_C.csv
	TaxMP_MPAv1_OldWF_Hgut_1_C.csv		Eukaryota	Fungi	Unknown Phylum	Unknown Class	Unknown Order	Unknown Family	Unknown Genus	Unknown Species	Unknown Subspecies	2	1		TaxMP_MPAv1_OldWF_Hgut_1_C.csv
	TaxMP_MPAv1_OldWF_Hgut_1_C.csv		Bacteria	Unknown Kingdom	Proteobacteria	Deltaproteobacteria	Desulfobacterales	Desulfobacteraceae	Desulfococcus	Desulfococcus oleovorans	Desulfococcus oleovorans Hxd3	1	1		TaxMP_MPAv1_OldWF_Hgut_1_C.csv
	TaxMP_MPAv1_OldWF_Hgut_1_C.csv		Eukaryota	Fungi	Ascomycota	Saccharomycetes	Saccharomycetales	Saccharomycetaceae	Nakaseomyces	Candida glabrata	Candida glabrata CBS 138	3	5		TaxMP_MPAv1_OldWF_Hgut_1_C.csv
	TaxMP_MPAv1_OldWF_Hgut_1_C.csv		Eukaryota	Metazoa	Chordata	Mammalia	Unknown Order	Bovidae	Bos	Bos taurus	Unknown Subspecies	1	2		TaxMP_MPAv1_OldWF_Hgut_1_C.csv
	TaxMP_MPAv1_OldWF_Hgut_1_C.csv		Eukaryota	Fungi	Ascomycota	Saccharomycetes	Saccharomycetales	Unknown Family	Candida	Candida albicans	Candida albicans SC5314	1	1		TaxMP_MPAv1_OldWF_Hgut_1_C.csv
	TaxMP_MPAv1_OldWF_Hgut_1_C.csv		Bacteria	Unknown Kingdom	Firmicutes	Bacilli	Bacillales	Staphylococcaceae	Staphylococcus	Staphylococcus aureus subsp. aureus USA300_TCH1516	Staphylococcus aureus subsp. aureus	1	1		TaxMP_MPAv1_OldWF_Hgut_1_C.csv
	TaxMP_MPAv1_OldWF_Hgut_1_C.csv		Eukaryota	Fungi	Ascomycota	Unknown Class	Unknown Order	Unknown Family	Unknown Genus	Unknown Species	Unknown Subspecies	1	2		TaxMP_MPAv1_OldWF_Hgut_1_C.csv
	TaxMP_MPAv1_OldWF_Hgut_1_C.csv		Eukaryota	Fungi	Ascomycota	Saccharomycetes	Saccharomycetales	Saccharomycetaceae	Unknown Genus	Unknown Species	Unknown Subspecies	2	3		TaxMP_MPAv1_OldWF_Hgut_1_C.csv
	TaxMP_MPAv1_OldWF_Hgut_1_C.csv		Eukaryota	Metazoa	Chordata	Mammalia	Primates	Cercopithecidae	Chlorocebus	Chlorocebus aethiops	Unknown Subspecies	1	1		TaxMP_MPAv1_OldWF_Hgut_1_C.csv
	TaxMP_MPAv1_OldWF_Hgut_1_C.csv		Eukaryota	Metazoa	Chordata	Unknown Class	Unknown Order	Unknown Family	Unknown Genus	Unknown Species	Unknown Subspecies	4	2		TaxMP_MPAv1_OldWF_Hgut_1_C.csv
	TaxMP_MPAv1_OldWF_Hgut_2_A.csv		Unknown Superkingdom	Unknown Kingdom	Unknown Phylum	Unknown Class	Unknown Order	Unknown Family	Unknown Genus	Unknown Species	Unknown Subspecies	395	559		TaxMP_MPAv1_OldWF_Hgut_2_A.csv
	TaxMP_MPAv1_OldWF_Hgut_2_A.csv		Bacteria	Unknown Kingdom	Unknown Phylum	Unknown Class	Unknown Order	Unknown Family	Unknown Genus	Unknown Species	Unknown Subspecies	5	8		TaxMP_MPAv1_OldWF_Hgut_2_A.csv
	TaxMP_MPAv1_OldWF_Hgut_2_A.csv		Eukaryota	Metazoa	Chordata	Mammalia	Unknown Order	Unknown Family	Unknown Genus	Unknown Species	Unknown Subspecies	2	4		TaxMP_MPAv1_OldWF_Hgut_2_A.csv
	TaxMP_MPAv1_OldWF_Hgut_2_A.csv		Eukaryota	Metazoa	Chordata	Mammalia	Primates	Hominidae	Unknown Genus	Unknown Species	Unknown Subspecies	2	2		TaxMP_MPAv1_OldWF_Hgut_2_A.csv
	TaxMP_MPAv1_OldWF_Hgut_2_A.csv		Eukaryota	Metazoa	Chordata	Mammalia	Primates	Hominidae	Homo	Homo sapiens	Unknown Subspecies	7	10		TaxMP_MPAv1_OldWF_Hgut_2_A.csv
	TaxMP_MPAv1_OldWF_Hgut_2_A.csv		Eukaryota	Metazoa	Chordata	Aves	Galliformes	Phasianidae	Gallus	Gallus gallus	Unknown Subspecies	1	2		TaxMP_MPAv1_OldWF_Hgut_2_A.csv
	TaxMP_MPAv1_OldWF_Hgut_2_A.csv		Eukaryota	Unknown Kingdom	Unknown Phylum	Unknown Class	Unknown Order	Unknown Family	Unknown Genus	Unknown Species	Unknown Subspecies	3	3		TaxMP_MPAv1_OldWF_Hgut_2_A.csv
	TaxMP_MPAv1_OldWF_Hgut_2_A.csv		Eukaryota	Viridiplantae	Streptophyta	Unknown Class	Asterales	Asteraceae	Helianthus	Helianthus annuus	Unknown Subspecies	2	2		TaxMP_MPAv1_OldWF_Hgut_2_A.csv
	TaxMP_MPAv1_OldWF_Hgut_2_A.csv		Eukaryota	Metazoa	Chordata	Mammalia	Rodentia	Muridae	Mus	Mus musculus	Unknown Subspecies	2	3		TaxMP_MPAv1_OldWF_Hgut_2_A.csv
	TaxMP_MPAv1_OldWF_Hgut_2_A.csv		Eukaryota	Viridiplantae	Streptophyta	Liliopsida	Poales	Poaceae	Oryza	Oryza sativa	Oryza sativa Japonica Group	1	1		TaxMP_MPAv1_OldWF_Hgut_2_A.csv
	TaxMP_MPAv1_OldWF_Hgut_2_A.csv		Bacteria	Unknown Kingdom	Bacteroidetes	Bacteroidia	Bacteroidales	Bacteroidaceae	Bacteroides	Bacteroides fragilis	Bacteroides fragilis NCTC 9343	1	1		TaxMP_MPAv1_OldWF_Hgut_2_A.csv
	TaxMP_MPAv1_OldWF_Hgut_2_A.csv		Eukaryota	Viridiplantae	Streptophyta	Unknown Class	Cucurbitales	Cucurbitaceae	Cucurbita	Cucurbita maxima	Unknown Subspecies	5	13		TaxMP_MPAv1_OldWF_Hgut_2_A.csv
	TaxMP_MPAv1_OldWF_Hgut_2_A.csv		Eukaryota	Fungi	Unknown Phylum	Unknown Class	Unknown Order	Unknown Family	Unknown Genus	Unknown Species	Unknown Subspecies	2	1		TaxMP_MPAv1_OldWF_Hgut_2_A.csv
	TaxMP_MPAv1_OldWF_Hgut_2_A.csv		Eukaryota	Viridiplantae	Streptophyta	Liliopsida	Poales	Poaceae	Avena	Avena sativa	Unknown Subspecies	2	5		TaxMP_MPAv1_OldWF_Hgut_2_A.csv
	TaxMP_MPAv1_OldWF_Hgut_2_A.csv		Bacteria	Unknown Kingdom	Firmicutes	Clostridia	Clostridiales	Clostridiaceae	Clostridium	Clostridium phytofermentans	Clostridium phytofermentans ISDg	2	3		TaxMP_MPAv1_OldWF_Hgut_2_A.csv
	TaxMP_MPAv1_OldWF_Hgut_2_A.csv		Eukaryota	Viridiplantae	Streptophyta	Unknown Class	Rosales	Rosaceae	Prunus	Prunus avium	Unknown Subspecies	1	1		TaxMP_MPAv1_OldWF_Hgut_2_A.csv
	TaxMP_MPAv1_OldWF_Hgut_2_A.csv		Eukaryota	Viridiplantae	Streptophyta	Unknown Class	Lamiales	Pedaliaceae	Sesamum	Sesamum indicum	Unknown Subspecies	2	7		TaxMP_MPAv1_OldWF_Hgut_2_A.csv
	TaxMP_MPAv1_OldWF_Hgut_2_A.csv		Bacteria	Unknown Kingdom	Firmicutes	Unknown Class	Unknown Order	Unknown Family	Unknown Genus	Unknown Species	Unknown Subspecies	2	1		TaxMP_MPAv1_OldWF_Hgut_2_A.csv
	TaxMP_MPAv1_OldWF_Hgut_2_A.csv		Bacteria	Unknown Kingdom	Chlorobi	Chlorobia	Chlorobiales	Chlorobiaceae	Pelodictyon	Pelodictyon phaeoclathratiforme	Pelodictyon phaeoclathratiforme BU-1	1	1		TaxMP_MPAv1_OldWF_Hgut_2_A.csv
	TaxMP_MPAv1_OldWF_Hgut_2_A.csv		Bacteria	Unknown Kingdom	Proteobacteria	Epsilonproteobacteria	Campylobacterales	Campylobacteraceae	Arcobacter	Arcobacter butzleri	Arcobacter butzleri RM4018	1	2		TaxMP_MPAv1_OldWF_Hgut_2_A.csv
	TaxMP_MPAv1_OldWF_Hgut_2_A.csv		Eukaryota	Metazoa	Chordata	Unknown Class	Unknown Order	Unknown Family	Unknown Genus	Unknown Species	Unknown Subspecies	2	2		TaxMP_MPAv1_OldWF_Hgut_2_A.csv
	TaxMP_MPAv1_OldWF_Hgut_2_A.csv		Bacteria	Unknown Kingdom	Proteobacteria	Gammaproteobacteria	Enterobacteriales	Enterobacteriaceae	Unknown Genus	Unknown Species	Unknown Subspecies	1	3		TaxMP_MPAv1_OldWF_Hgut_2_A.csv
	TaxMP_MPAv1_OldWF_Hgut_2_B.csv		Unknown Superkingdom	Unknown Kingdom	Unknown Phylum	Unknown Class	Unknown Order	Unknown Family	Unknown Genus	Unknown Species	Unknown Subspecies	340	494		TaxMP_MPAv1_OldWF_Hgut_2_B.csv
	TaxMP_MPAv1_OldWF_Hgut_2_B.csv		Eukaryota	Viridiplantae	Streptophyta	Liliopsida	Poales	Poaceae	Zea	Zea mays	Unknown Subspecies	1	1		TaxMP_MPAv1_OldWF_Hgut_2_B.csv
	TaxMP_MPAv1_OldWF_Hgut_2_B.csv		Eukaryota	Metazoa	Chordata	Mammalia	Unknown Order	Unknown Family	Unknown Genus	Unknown Species	Unknown Subspecies	6	11		TaxMP_MPAv1_OldWF_Hgut_2_B.csv
	TaxMP_MPAv1_OldWF_Hgut_2_B.csv		Bacteria	Unknown Kingdom	Unknown Phylum	Unknown Class	Unknown Order	Unknown Family	Unknown Genus	Unknown Species	Unknown Subspecies	3	3		TaxMP_MPAv1_OldWF_Hgut_2_B.csv
	TaxMP_MPAv1_OldWF_Hgut_2_B.csv		Eukaryota	Metazoa	Chordata	Mammalia	Primates	Unknown Family	Unknown Genus	Unknown Species	Unknown Subspecies	2	4		TaxMP_MPAv1_OldWF_Hgut_2_B.csv
	TaxMP_MPAv1_OldWF_Hgut_2_B.csv		Eukaryota	Metazoa	Chordata	Amphibia	Anura	Pipidae	Xenopus	Xenopus laevis	Unknown Subspecies	1	2		TaxMP_MPAv1_OldWF_Hgut_2_B.csv
	TaxMP_MPAv1_OldWF_Hgut_2_B.csv		Eukaryota	Metazoa	Chordata	Mammalia	Primates	Hominidae	Homo	Homo sapiens	Unknown Subspecies	7	10		TaxMP_MPAv1_OldWF_Hgut_2_B.csv
	TaxMP_MPAv1_OldWF_Hgut_2_B.csv		Eukaryota	Metazoa	Chordata	Aves	Galliformes	Phasianidae	Gallus	Gallus gallus	Unknown Subspecies	1	1		TaxMP_MPAv1_OldWF_Hgut_2_B.csv
	TaxMP_MPAv1_OldWF_Hgut_2_B.csv		Eukaryota	Viridiplantae	Streptophyta	Unknown Class	Asterales	Asteraceae	Helianthus	Helianthus annuus	Unknown Subspecies	2	3		TaxMP_MPAv1_OldWF_Hgut_2_B.csv
	TaxMP_MPAv1_OldWF_Hgut_2_B.csv		Bacteria	Unknown Kingdom	Bacteroidetes	Bacteroidia	Bacteroidales	Bacteroidaceae	Bacteroides	Bacteroides fragilis	Bacteroides fragilis YCH46	1	1		TaxMP_MPAv1_OldWF_Hgut_2_B.csv
	TaxMP_MPAv1_OldWF_Hgut_2_B.csv		Eukaryota	Metazoa	Chordata	Mammalia	Rodentia	Muridae	Mus	Mus musculus	Unknown Subspecies	1	2		TaxMP_MPAv1_OldWF_Hgut_2_B.csv
	TaxMP_MPAv1_OldWF_Hgut_2_B.csv		Eukaryota	Viridiplantae	Streptophyta	Liliopsida	Poales	Poaceae	Oryza	Oryza sativa	Oryza sativa Indica Group	1	1		TaxMP_MPAv1_OldWF_Hgut_2_B.csv
	TaxMP_MPAv1_OldWF_Hgut_2_B.csv		Bacteria	Unknown Kingdom	Bacteroidetes	Bacteroidia	Bacteroidales	Bacteroidaceae	Bacteroides	Bacteroides fragilis	Bacteroides fragilis NCTC 9343	1	3		TaxMP_MPAv1_OldWF_Hgut_2_B.csv
	TaxMP_MPAv1_OldWF_Hgut_2_B.csv		Eukaryota	Viridiplantae	Streptophyta	Unknown Class	Cucurbitales	Cucurbitaceae	Cucurbita	Cucurbita maxima	Unknown Subspecies	4	11		TaxMP_MPAv1_OldWF_Hgut_2_B.csv
	TaxMP_MPAv1_OldWF_Hgut_2_B.csv		Bacteria	Unknown Kingdom	Firmicutes	Bacilli	Bacillales	Bacillaceae	Geobacillus	Geobacillus stearothermophilus	Unknown Subspecies	1	2		TaxMP_MPAv1_OldWF_Hgut_2_B.csv
	TaxMP_MPAv1_OldWF_Hgut_2_B.csv		Eukaryota	Viridiplantae	Streptophyta	Liliopsida	Poales	Poaceae	Avena	Avena sativa	Unknown Subspecies	4	7		TaxMP_MPAv1_OldWF_Hgut_2_B.csv
	TaxMP_MPAv1_OldWF_Hgut_2_B.csv		Eukaryota	Viridiplantae	Streptophyta	Liliopsida	Poales	Poaceae	Triticum	Triticum aestivum	Unknown Subspecies	1	1		TaxMP_MPAv1_OldWF_Hgut_2_B.csv
	TaxMP_MPAv1_OldWF_Hgut_2_B.csv		Eukaryota	Viridiplantae	Streptophyta	Unknown Class	Lamiales	Pedaliaceae	Sesamum	Sesamum indicum	Unknown Subspecies	2	4		TaxMP_MPAv1_OldWF_Hgut_2_B.csv
	TaxMP_MPAv1_OldWF_Hgut_2_B.csv		Bacteria	Unknown Kingdom	Firmicutes	Unknown Class	Unknown Order	Unknown Family	Unknown Genus	Unknown Species	Unknown Subspecies	2	1		TaxMP_MPAv1_OldWF_Hgut_2_B.csv
	TaxMP_MPAv1_OldWF_Hgut_2_B.csv		Eukaryota	Viridiplantae	Streptophyta	Unknown Class	Malvales	Malvaceae	Theobroma	Theobroma cacao	Unknown Subspecies	1	1		TaxMP_MPAv1_OldWF_Hgut_2_B.csv
	TaxMP_MPAv1_OldWF_Hgut_2_B.csv		Eukaryota	Metazoa	Chordata	Mammalia	Unknown Order	Bovidae	Bos	Bos taurus	Unknown Subspecies	3	3		TaxMP_MPAv1_OldWF_Hgut_2_B.csv
	TaxMP_MPAv1_OldWF_Hgut_2_B.csv		Bacteria	Unknown Kingdom	Proteobacteria	Deltaproteobacteria	Desulfuromonadales	Geobacteraceae	Geobacter	Geobacter sulfurreducens	Geobacter sulfurreducens PCA	1	1		TaxMP_MPAv1_OldWF_Hgut_2_B.csv
	TaxMP_MPAv1_OldWF_Hgut_2_C.csv		Unknown Superkingdom	Unknown Kingdom	Unknown Phylum	Unknown Class	Unknown Order	Unknown Family	Unknown Genus	Unknown Species	Unknown Subspecies	185	237		TaxMP_MPAv1_OldWF_Hgut_2_C.csv
	TaxMP_MPAv1_OldWF_Hgut_2_C.csv		Eukaryota	Metazoa	Chordata	Mammalia	Unknown Order	Unknown Family	Unknown Genus	Unknown Species	Unknown Subspecies	3	2		TaxMP_MPAv1_OldWF_Hgut_2_C.csv
	TaxMP_MPAv1_OldWF_Hgut_2_C.csv		Bacteria	Unknown Kingdom	Unknown Phylum	Unknown Class	Unknown Order	Unknown Family	Unknown Genus	Unknown Species	Unknown Subspecies	3	3		TaxMP_MPAv1_OldWF_Hgut_2_C.csv
	TaxMP_MPAv1_OldWF_Hgut_2_C.csv		Eukaryota	Metazoa	Chordata	Mammalia	Primates	Unknown Family	Unknown Genus	Unknown Species	Unknown Subspecies	1	2		TaxMP_MPAv1_OldWF_Hgut_2_C.csv
	TaxMP_MPAv1_OldWF_Hgut_2_C.csv		Eukaryota	Metazoa	Chordata	Mammalia	Rodentia	Muridae	Rattus	Rattus norvegicus	Unknown Subspecies	1	1		TaxMP_MPAv1_OldWF_Hgut_2_C.csv
	TaxMP_MPAv1_OldWF_Hgut_2_C.csv		Eukaryota	Metazoa	Chordata	Mammalia	Perissodactyla	Equidae	Equus	Equus caballus	Unknown Subspecies	1	1		TaxMP_MPAv1_OldWF_Hgut_2_C.csv
	TaxMP_MPAv1_OldWF_Hgut_2_C.csv		Eukaryota	Viridiplantae	Streptophyta	Unknown Class	Unknown Order	Unknown Family	Unknown Genus	Unknown Species	Unknown Subspecies	1	1		TaxMP_MPAv1_OldWF_Hgut_2_C.csv
	TaxMP_MPAv1_OldWF_Hgut_2_C.csv		Eukaryota	Metazoa	Chordata	Mammalia	Primates	Cercopithecidae	Macaca	Macaca fascicularis	Unknown Subspecies	1	1		TaxMP_MPAv1_OldWF_Hgut_2_C.csv
	TaxMP_MPAv1_OldWF_Hgut_2_C.csv		Eukaryota	Metazoa	Chordata	Mammalia	Primates	Hominidae	Homo	Homo sapiens	Unknown Subspecies	2	3		TaxMP_MPAv1_OldWF_Hgut_2_C.csv
	TaxMP_MPAv1_OldWF_Hgut_2_C.csv		Eukaryota	Viridiplantae	Streptophyta	Unknown Class	Asterales	Asteraceae	Helianthus	Helianthus annuus	Unknown Subspecies	3	4		TaxMP_MPAv1_OldWF_Hgut_2_C.csv
	TaxMP_MPAv1_OldWF_Hgut_2_C.csv		Bacteria	Unknown Kingdom	Bacteroidetes	Bacteroidia	Bacteroidales	Bacteroidaceae	Bacteroides	Bacteroides thetaiotaomicron	Bacteroides thetaiotaomicron VPI-5482	1	1		TaxMP_MPAv1_OldWF_Hgut_2_C.csv
	TaxMP_MPAv1_OldWF_Hgut_2_C.csv		Eukaryota	Viridiplantae	Streptophyta	Unknown Class	Cucurbitales	Cucurbitaceae	Cucurbita	Cucurbita maxima	Unknown Subspecies	3	6		TaxMP_MPAv1_OldWF_Hgut_2_C.csv
	TaxMP_MPAv1_OldWF_Hgut_2_C.csv		Eukaryota	Viridiplantae	Streptophyta	Liliopsida	Poales	Poaceae	Avena	Avena sativa	Unknown Subspecies	1	2		TaxMP_MPAv1_OldWF_Hgut_2_C.csv
	TaxMP_MPAv1_OldWF_Hgut_2_C.csv		Bacteria	Unknown Kingdom	Proteobacteria	Gammaproteobacteria	Enterobacteriales	Enterobacteriaceae	Escherichia	Escherichia coli	Unknown Subspecies	1	2		TaxMP_MPAv1_OldWF_Hgut_2_C.csv
	TaxMP_MPAv1_OldWF_Hgut_2_C.csv		Eukaryota	Viridiplantae	Streptophyta	Liliopsida	Poales	Poaceae	Triticum	Triticum aestivum	Unknown Subspecies	1	2		TaxMP_MPAv1_OldWF_Hgut_2_C.csv
	TaxMP_MPAv1_OldWF_Hgut_2_C.csv		Bacteria	Unknown Kingdom	Firmicutes	Unknown Class	Unknown Order	Unknown Family	Unknown Genus	Unknown Species	Unknown Subspecies	1	1		TaxMP_MPAv1_OldWF_Hgut_2_C.csv
	TaxMP_MPAv1_OldWF_Hgut_2_C.csv		Eukaryota	Metazoa	Chordata	Mammalia	Primates	Hominidae	Gorilla	Gorilla gorilla	Gorilla gorilla gorilla	1	1		TaxMP_MPAv1_OldWF_Hgut_2_C.csv
	TaxMP_MPAv1_OldWF_Hgut_3_A.csv		Bacteria	Unknown Kingdom	Bacteroidetes	Bacteroidia	Bacteroidales	Bacteroidaceae	Bacteroides	Bacteroides vulgatus	Bacteroides vulgatus ATCC 8482	4	5		TaxMP_MPAv1_OldWF_Hgut_3_A.csv
	TaxMP_MPAv1_OldWF_Hgut_3_A.csv		Unknown Superkingdom	Unknown Kingdom	Unknown Phylum	Unknown Class	Unknown Order	Unknown Family	Unknown Genus	Unknown Species	Unknown Subspecies	1034	1862		TaxMP_MPAv1_OldWF_Hgut_3_A.csv
	TaxMP_MPAv1_OldWF_Hgut_3_A.csv		Bacteria	Unknown Kingdom	Unknown Phylum	Unknown Class	Unknown Order	Unknown Family	Unknown Genus	Unknown Species	Unknown Subspecies	3	3		TaxMP_MPAv1_OldWF_Hgut_3_A.csv
	TaxMP_MPAv1_OldWF_Hgut_3_A.csv		Eukaryota	Viridiplantae	Unknown Phylum	Unknown Class	Unknown Order	Unknown Family	Unknown Genus	Unknown Species	Unknown Subspecies	1	1		TaxMP_MPAv1_OldWF_Hgut_3_A.csv
	TaxMP_MPAv1_OldWF_Hgut_3_A.csv		Eukaryota	Metazoa	Chordata	Mammalia	Rodentia	Muridae	Rattus	Rattus norvegicus	Unknown Subspecies	1	1		TaxMP_MPAv1_OldWF_Hgut_3_A.csv
	TaxMP_MPAv1_OldWF_Hgut_3_A.csv		Eukaryota	Metazoa	Chordata	Mammalia	Primates	Hominidae	Homo	Homo sapiens	Unknown Subspecies	9	11		TaxMP_MPAv1_OldWF_Hgut_3_A.csv
	TaxMP_MPAv1_OldWF_Hgut_3_A.csv		Eukaryota	Metazoa	Chordata	Aves	Galliformes	Phasianidae	Gallus	Gallus gallus	Unknown Subspecies	7	11		TaxMP_MPAv1_OldWF_Hgut_3_A.csv
	TaxMP_MPAv1_OldWF_Hgut_3_A.csv		Eukaryota	Viridiplantae	Streptophyta	Unknown Class	Fabales	Fabaceae	Glycine	Glycine max	Unknown Subspecies	4	7		TaxMP_MPAv1_OldWF_Hgut_3_A.csv
	TaxMP_MPAv1_OldWF_Hgut_3_A.csv		Bacteria	Unknown Kingdom	Bacteroidetes	Bacteroidia	Bacteroidales	Bacteroidaceae	Bacteroides	Bacteroides thetaiotaomicron	Bacteroides thetaiotaomicron VPI-5482	3	6		TaxMP_MPAv1_OldWF_Hgut_3_A.csv
	TaxMP_MPAv1_OldWF_Hgut_3_A.csv		Eukaryota	Fungi	Ascomycota	Dothideomycetes	Dothideales	Dothioraceae	Aureobasidium	Aureobasidium pullulans	Unknown Subspecies	1	1		TaxMP_MPAv1_OldWF_Hgut_3_A.csv
	TaxMP_MPAv1_OldWF_Hgut_3_A.csv		Bacteria	Unknown Kingdom	Proteobacteria	Gammaproteobacteria	Enterobacteriales	Enterobacteriaceae	Escherichia	Escherichia coli	Escherichia coli CFT073	1	2		TaxMP_MPAv1_OldWF_Hgut_3_A.csv
	TaxMP_MPAv1_OldWF_Hgut_3_A.csv		Bacteria	Unknown Kingdom	Proteobacteria	Gammaproteobacteria	Enterobacteriales	Enterobacteriaceae	Escherichia	Escherichia coli	Escherichia coli UTI89	1	1		TaxMP_MPAv1_OldWF_Hgut_3_A.csv
	TaxMP_MPAv1_OldWF_Hgut_3_A.csv		Eukaryota	Metazoa	Chordata	Mammalia	Carnivora	Canidae	Canis	Canis lupus	Canis lupus familiaris	1	1		TaxMP_MPAv1_OldWF_Hgut_3_A.csv
	TaxMP_MPAv1_OldWF_Hgut_3_A.csv		Eukaryota	Metazoa	Chordata	Mammalia	Rodentia	Muridae	Unknown Genus	Unknown Species	Unknown Subspecies	1	1		TaxMP_MPAv1_OldWF_Hgut_3_A.csv
	TaxMP_MPAv1_OldWF_Hgut_3_A.csv		Eukaryota	Viridiplantae	Streptophyta	Unknown Class	Lamiales	Pedaliaceae	Sesamum	Sesamum indicum	Unknown Subspecies	10	22		TaxMP_MPAv1_OldWF_Hgut_3_A.csv
	TaxMP_MPAv1_OldWF_Hgut_3_A.csv		Bacteria	Unknown Kingdom	Firmicutes	Unknown Class	Unknown Order	Unknown Family	Unknown Genus	Unknown Species	Unknown Subspecies	3	2		TaxMP_MPAv1_OldWF_Hgut_3_A.csv
	TaxMP_MPAv1_OldWF_Hgut_3_A.csv		Eukaryota	Viridiplantae	Streptophyta	Unknown Class	Solanales	Convolvulaceae	Ipomoea	Ipomoea batatas	Unknown Subspecies	1	1		TaxMP_MPAv1_OldWF_Hgut_3_A.csv
	TaxMP_MPAv1_OldWF_Hgut_3_A.csv		Eukaryota	Metazoa	Chordata	Unknown Class	Unknown Order	Unknown Family	Unknown Genus	Unknown Species	Unknown Subspecies	3	3		TaxMP_MPAv1_OldWF_Hgut_3_A.csv
	TaxMP_MPAv1_OldWF_Hgut_3_A.csv		Eukaryota	Metazoa	Chordata	Mammalia	Unknown Order	Suidae	Sus	Sus scrofa	Unknown Subspecies	1	2		TaxMP_MPAv1_OldWF_Hgut_3_A.csv
	TaxMP_MPAv1_OldWF_Hgut_3_A.csv		Eukaryota	Metazoa	Chordata	Mammalia	Unknown Order	Unknown Family	Unknown Genus	Unknown Species	Unknown Subspecies	14	24		TaxMP_MPAv1_OldWF_Hgut_3_A.csv
	TaxMP_MPAv1_OldWF_Hgut_3_A.csv		Bacteria	Unknown Kingdom	Proteobacteria	Gammaproteobacteria	Enterobacteriales	Enterobacteriaceae	Escherichia	Escherichia coli	Escherichia coli E24377A	1	2		TaxMP_MPAv1_OldWF_Hgut_3_A.csv
	TaxMP_MPAv1_OldWF_Hgut_3_A.csv		Bacteria	Unknown Kingdom	Firmicutes	Clostridia	Clostridiales	Eubacteriaceae	Eubacterium	Eubacterium rectale	Eubacterium rectale ATCC 33656	4	6		TaxMP_MPAv1_OldWF_Hgut_3_A.csv
	TaxMP_MPAv1_OldWF_Hgut_3_A.csv		Bacteria	Unknown Kingdom	Proteobacteria	Gammaproteobacteria	Enterobacteriales	Enterobacteriaceae	Enterobacter	Enterobacter cloacae	Unknown Subspecies	1	1		TaxMP_MPAv1_OldWF_Hgut_3_A.csv
	TaxMP_MPAv1_OldWF_Hgut_3_A.csv		Eukaryota	Metazoa	Chordata	Mammalia	Rodentia	Muridae	Mus	Mus musculus	Unknown Subspecies	2	3		TaxMP_MPAv1_OldWF_Hgut_3_A.csv
	TaxMP_MPAv1_OldWF_Hgut_3_A.csv		Bacteria	Unknown Kingdom	Firmicutes	Bacilli	Bacillales	Bacillaceae	Bacillus	Unknown Species	Unknown Subspecies	1	2		TaxMP_MPAv1_OldWF_Hgut_3_A.csv
	TaxMP_MPAv1_OldWF_Hgut_3_A.csv		Eukaryota	Metazoa	Chordata	Aves	Galliformes	Phasianidae	Unknown Genus	Unknown Species	Unknown Subspecies	1	2		TaxMP_MPAv1_OldWF_Hgut_3_A.csv
	TaxMP_MPAv1_OldWF_Hgut_3_A.csv		Bacteria	Unknown Kingdom	Firmicutes	Clostridia	Clostridiales	Peptococcaceae	Desulfitobacterium	Desulfitobacterium hafniense	Desulfitobacterium hafniense DCB-2	1	2		TaxMP_MPAv1_OldWF_Hgut_3_A.csv
	TaxMP_MPAv1_OldWF_Hgut_3_A.csv		Bacteria	Unknown Kingdom	Firmicutes	Bacilli	Unknown Order	Unknown Family	Unknown Genus	Unknown Species	Unknown Subspecies	2	1		TaxMP_MPAv1_OldWF_Hgut_3_A.csv
	TaxMP_MPAv1_OldWF_Hgut_3_A.csv		Eukaryota	Metazoa	Chordata	Mammalia	Rodentia	Cricetidae	Mesocricetus	Mesocricetus auratus	Unknown Subspecies	1	1		TaxMP_MPAv1_OldWF_Hgut_3_A.csv
	TaxMP_MPAv1_OldWF_Hgut_3_A.csv		Bacteria	Unknown Kingdom	Firmicutes	Clostridia	Clostridiales	Clostridiaceae	Clostridium	Clostridium phytofermentans	Clostridium phytofermentans ISDg	1	1		TaxMP_MPAv1_OldWF_Hgut_3_A.csv
	TaxMP_MPAv1_OldWF_Hgut_3_A.csv		Eukaryota	Fungi	Ascomycota	Saccharomycetes	Saccharomycetales	Saccharomycetaceae	Nakaseomyces	Candida glabrata	Candida glabrata CBS 138	1	1		TaxMP_MPAv1_OldWF_Hgut_3_A.csv
	TaxMP_MPAv1_OldWF_Hgut_3_A.csv		Eukaryota	Metazoa	Unknown Phylum	Unknown Class	Unknown Order	Unknown Family	Unknown Genus	Unknown Species	Unknown Subspecies	1	3		TaxMP_MPAv1_OldWF_Hgut_3_A.csv
	TaxMP_MPAv1_OldWF_Hgut_3_A.csv		Eukaryota	Metazoa	Chordata	Mammalia	Unknown Order	Bovidae	Bos	Bos taurus	Unknown Subspecies	4	5		TaxMP_MPAv1_OldWF_Hgut_3_A.csv
	TaxMP_MPAv1_OldWF_Hgut_3_A.csv		Bacteria	Unknown Kingdom	Chlorobi	Chlorobia	Chlorobiales	Chlorobiaceae	Pelodictyon	Pelodictyon luteolum	Chlorobium luteolum DSM 273	1	1		TaxMP_MPAv1_OldWF_Hgut_3_A.csv
	TaxMP_MPAv1_OldWF_Hgut_3_B.csv		Bacteria	Unknown Kingdom	Bacteroidetes	Bacteroidia	Bacteroidales	Bacteroidaceae	Bacteroides	Bacteroides vulgatus	Bacteroides vulgatus ATCC 8482	3	3		TaxMP_MPAv1_OldWF_Hgut_3_B.csv
	TaxMP_MPAv1_OldWF_Hgut_3_B.csv		Unknown Superkingdom	Unknown Kingdom	Unknown Phylum	Unknown Class	Unknown Order	Unknown Family	Unknown Genus	Unknown Species	Unknown Subspecies	545	887		TaxMP_MPAv1_OldWF_Hgut_3_B.csv
	TaxMP_MPAv1_OldWF_Hgut_3_B.csv		Bacteria	Unknown Kingdom	Unknown Phylum	Unknown Class	Unknown Order	Unknown Family	Unknown Genus	Unknown Species	Unknown Subspecies	1	2		TaxMP_MPAv1_OldWF_Hgut_3_B.csv
	TaxMP_MPAv1_OldWF_Hgut_3_B.csv		Eukaryota	Metazoa	Chordata	Mammalia	Primates	Hominidae	Unknown Genus	Unknown Species	Unknown Subspecies	1	2		TaxMP_MPAv1_OldWF_Hgut_3_B.csv
	TaxMP_MPAv1_OldWF_Hgut_3_B.csv		Eukaryota	Metazoa	Chordata	Mammalia	Primates	Hominidae	Homo	Homo sapiens	Unknown Subspecies	17	27		TaxMP_MPAv1_OldWF_Hgut_3_B.csv
	TaxMP_MPAv1_OldWF_Hgut_3_B.csv		Eukaryota	Metazoa	Chordata	Aves	Galliformes	Phasianidae	Gallus	Gallus gallus	Unknown Subspecies	2	3		TaxMP_MPAv1_OldWF_Hgut_3_B.csv
	TaxMP_MPAv1_OldWF_Hgut_3_B.csv		Bacteria	Unknown Kingdom	Spirochaetes	Spirochaetia	Spirochaetales	Spirochaetaceae	Treponema	Treponema denticola	Treponema denticola ATCC 35405	1	2		TaxMP_MPAv1_OldWF_Hgut_3_B.csv
	TaxMP_MPAv1_OldWF_Hgut_3_B.csv		Eukaryota	Metazoa	Chordata	Mammalia	Primates	Cercopithecidae	Macaca	Macaca mulatta	Unknown Subspecies	1	1		TaxMP_MPAv1_OldWF_Hgut_3_B.csv
	TaxMP_MPAv1_OldWF_Hgut_3_B.csv		Bacteria	Unknown Kingdom	Proteobacteria	Unknown Class	Unknown Order	Unknown Family	Unknown Genus	Unknown Species	Unknown Subspecies	2	1		TaxMP_MPAv1_OldWF_Hgut_3_B.csv
	TaxMP_MPAv1_OldWF_Hgut_3_B.csv		Bacteria	Unknown Kingdom	Proteobacteria	Gammaproteobacteria	Enterobacteriales	Enterobacteriaceae	Shigella	Shigella flexneri	Shigella flexneri 5 str. 8401	1	1		TaxMP_MPAv1_OldWF_Hgut_3_B.csv
	TaxMP_MPAv1_OldWF_Hgut_3_B.csv		Eukaryota	Metazoa	Chordata	Mammalia	Carnivora	Canidae	Canis	Canis lupus	Canis lupus familiaris	1	1		TaxMP_MPAv1_OldWF_Hgut_3_B.csv
	TaxMP_MPAv1_OldWF_Hgut_3_B.csv		Bacteria	Unknown Kingdom	Firmicutes	Bacilli	Bacillales	Bacillaceae	Geobacillus	Geobacillus thermodenitrificans	Geobacillus thermodenitrificans NG80-2	1	1		TaxMP_MPAv1_OldWF_Hgut_3_B.csv
	TaxMP_MPAv1_OldWF_Hgut_3_B.csv		Bacteria	Unknown Kingdom	Proteobacteria	Gammaproteobacteria	Unknown Order	Unknown Family	Unknown Genus	Unknown Species	Unknown Subspecies	3	2		TaxMP_MPAv1_OldWF_Hgut_3_B.csv
	TaxMP_MPAv1_OldWF_Hgut_3_B.csv		Bacteria	Unknown Kingdom	Proteobacteria	Gammaproteobacteria	Oceanospirillales	Hahellaceae	Hahella	Hahella chejuensis	Hahella chejuensis KCTC 2396	1	1		TaxMP_MPAv1_OldWF_Hgut_3_B.csv
	TaxMP_MPAv1_OldWF_Hgut_3_B.csv		Eukaryota	Viridiplantae	Streptophyta	Unknown Class	Lamiales	Pedaliaceae	Sesamum	Sesamum indicum	Unknown Subspecies	3	3		TaxMP_MPAv1_OldWF_Hgut_3_B.csv
	TaxMP_MPAv1_OldWF_Hgut_3_B.csv		Bacteria	Unknown Kingdom	Firmicutes	Unknown Class	Unknown Order	Unknown Family	Unknown Genus	Unknown Species	Unknown Subspecies	2	1		TaxMP_MPAv1_OldWF_Hgut_3_B.csv
	TaxMP_MPAv1_OldWF_Hgut_3_B.csv		Eukaryota	Viridiplantae	Streptophyta	Unknown Class	Solanales	Convolvulaceae	Ipomoea	Ipomoea batatas	Unknown Subspecies	1	2		TaxMP_MPAv1_OldWF_Hgut_3_B.csv
	TaxMP_MPAv1_OldWF_Hgut_3_B.csv		Eukaryota	Fungi	Ascomycota	Saccharomycetes	Saccharomycetales	Saccharomycetaceae	Unknown Genus	Unknown Species	Unknown Subspecies	1	2		TaxMP_MPAv1_OldWF_Hgut_3_B.csv
	TaxMP_MPAv1_OldWF_Hgut_3_B.csv		Eukaryota	Metazoa	Chordata	Unknown Class	Unknown Order	Unknown Family	Unknown Genus	Unknown Species	Unknown Subspecies	1	2		TaxMP_MPAv1_OldWF_Hgut_3_B.csv
	TaxMP_MPAv1_OldWF_Hgut_3_B.csv		Eukaryota	Metazoa	Chordata	Mammalia	Unknown Order	Unknown Family	Unknown Genus	Unknown Species	Unknown Subspecies	7	6		TaxMP_MPAv1_OldWF_Hgut_3_B.csv
	TaxMP_MPAv1_OldWF_Hgut_3_B.csv		Bacteria	Unknown Kingdom	Firmicutes	Clostridia	Clostridiales	Eubacteriaceae	Eubacterium	Eubacterium rectale	Eubacterium rectale ATCC 33656	3	5		TaxMP_MPAv1_OldWF_Hgut_3_B.csv
	TaxMP_MPAv1_OldWF_Hgut_3_B.csv		Bacteria	Unknown Kingdom	Proteobacteria	Gammaproteobacteria	Enterobacteriales	Enterobacteriaceae	Enterobacter	Enterobacter aerogenes	Unknown Subspecies	1	1		TaxMP_MPAv1_OldWF_Hgut_3_B.csv
	TaxMP_MPAv1_OldWF_Hgut_3_B.csv		Eukaryota	Metazoa	Chordata	Mammalia	Rodentia	Muridae	Mus	Mus musculus	Unknown Subspecies	2	3		TaxMP_MPAv1_OldWF_Hgut_3_B.csv
	TaxMP_MPAv1_OldWF_Hgut_3_B.csv		Bacteria	Unknown Kingdom	Proteobacteria	Betaproteobacteria	Rhodocyclales	Rhodocyclaceae	Dechloromonas	Dechloromonas aromatica	Dechloromonas aromatica RCB	1	1		TaxMP_MPAv1_OldWF_Hgut_3_B.csv
	TaxMP_MPAv1_OldWF_Hgut_3_B.csv		Eukaryota	Fungi	Ascomycota	Saccharomycetes	Saccharomycetales	Saccharomycetaceae	Kluyveromyces	Kluyveromyces marxianus	Unknown Subspecies	1	1		TaxMP_MPAv1_OldWF_Hgut_3_B.csv
	TaxMP_MPAv1_OldWF_Hgut_3_B.csv		Eukaryota	Fungi	Ascomycota	Eurotiomycetes	Eurotiales	Trichocomaceae	Aspergillus	Aspergillus oryzae	Aspergillus oryzae RIB40	1	1		TaxMP_MPAv1_OldWF_Hgut_3_B.csv
	TaxMP_MPAv1_OldWF_Hgut_3_B.csv		Bacteria	Unknown Kingdom	Firmicutes	Clostridia	Clostridiales	Clostridiaceae	Clostridium	Clostridium phytofermentans	Clostridium phytofermentans ISDg	1	1		TaxMP_MPAv1_OldWF_Hgut_3_B.csv
	TaxMP_MPAv1_OldWF_Hgut_3_B.csv		Bacteria	Unknown Kingdom	Proteobacteria	Deltaproteobacteria	Myxococcales	Myxococcaceae	Myxococcus	Myxococcus xanthus	Myxococcus xanthus DK 1622	1	1		TaxMP_MPAv1_OldWF_Hgut_3_B.csv
	TaxMP_MPAv1_OldWF_Hgut_3_B.csv		Eukaryota	Metazoa	Chordata	Mammalia	Unknown Order	Bovidae	Bos	Bos taurus	Unknown Subspecies	2	2		TaxMP_MPAv1_OldWF_Hgut_3_B.csv
	TaxMP_MPAv1_OldWF_Hgut_3_B.csv		Bacteria	Unknown Kingdom	Proteobacteria	Gammaproteobacteria	Enterobacteriales	Enterobacteriaceae	Klebsiella	Klebsiella pneumoniae	Unknown Subspecies	1	1		TaxMP_MPAv1_OldWF_Hgut_3_B.csv
	TaxMP_MPAv1_OldWF_Hgut_3_C.csv		Bacteria	Unknown Kingdom	Bacteroidetes	Bacteroidia	Bacteroidales	Bacteroidaceae	Bacteroides	Bacteroides vulgatus	Bacteroides vulgatus ATCC 8482	2	3		TaxMP_MPAv1_OldWF_Hgut_3_C.csv
	TaxMP_MPAv1_OldWF_Hgut_3_C.csv		Unknown Superkingdom	Unknown Kingdom	Unknown Phylum	Unknown Class	Unknown Order	Unknown Family	Unknown Genus	Unknown Species	Unknown Subspecies	431	677		TaxMP_MPAv1_OldWF_Hgut_3_C.csv
	TaxMP_MPAv1_OldWF_Hgut_3_C.csv		Bacteria	Unknown Kingdom	Unknown Phylum	Unknown Class	Unknown Order	Unknown Family	Unknown Genus	Unknown Species	Unknown Subspecies	2	5		TaxMP_MPAv1_OldWF_Hgut_3_C.csv
	TaxMP_MPAv1_OldWF_Hgut_3_C.csv		Bacteria	Unknown Kingdom	Firmicutes	Bacilli	Bacillales	Bacillaceae	Unknown Genus	Unknown Species	Unknown Subspecies	1	2		TaxMP_MPAv1_OldWF_Hgut_3_C.csv
	TaxMP_MPAv1_OldWF_Hgut_3_C.csv		Eukaryota	Metazoa	Chordata	Mammalia	Primates	Hominidae	Homo	Homo sapiens	Unknown Subspecies	16	25		TaxMP_MPAv1_OldWF_Hgut_3_C.csv
	TaxMP_MPAv1_OldWF_Hgut_3_C.csv		Eukaryota	Metazoa	Chordata	Aves	Galliformes	Phasianidae	Gallus	Gallus gallus	Unknown Subspecies	1	1		TaxMP_MPAv1_OldWF_Hgut_3_C.csv
	TaxMP_MPAv1_OldWF_Hgut_3_C.csv		Eukaryota	Unknown Kingdom	Unknown Phylum	Unknown Class	Unknown Order	Unknown Family	Unknown Genus	Unknown Species	Unknown Subspecies	2	1		TaxMP_MPAv1_OldWF_Hgut_3_C.csv
	TaxMP_MPAv1_OldWF_Hgut_3_C.csv		Eukaryota	Viridiplantae	Streptophyta	Unknown Class	Fabales	Fabaceae	Glycine	Glycine max	Unknown Subspecies	2	2		TaxMP_MPAv1_OldWF_Hgut_3_C.csv
	TaxMP_MPAv1_OldWF_Hgut_3_C.csv		Bacteria	Unknown Kingdom	Proteobacteria	Alphaproteobacteria	Rickettsiales	Anaplasmataceae	Anaplasma	Anaplasma phagocytophilum	Anaplasma phagocytophilum HZ	1	1		TaxMP_MPAv1_OldWF_Hgut_3_C.csv
	TaxMP_MPAv1_OldWF_Hgut_3_C.csv		Bacteria	Unknown Kingdom	Firmicutes	Clostridia	Clostridiales	Clostridiaceae	Clostridium	Unknown Species	Unknown Subspecies	1	3		TaxMP_MPAv1_OldWF_Hgut_3_C.csv
	TaxMP_MPAv1_OldWF_Hgut_3_C.csv		Eukaryota	Metazoa	Chordata	Mammalia	Carnivora	Canidae	Canis	Canis lupus	Canis lupus familiaris	1	1		TaxMP_MPAv1_OldWF_Hgut_3_C.csv
	TaxMP_MPAv1_OldWF_Hgut_3_C.csv		Eukaryota	Fungi	Unknown Phylum	Unknown Class	Unknown Order	Unknown Family	Unknown Genus	Unknown Species	Unknown Subspecies	2	1		TaxMP_MPAv1_OldWF_Hgut_3_C.csv
	TaxMP_MPAv1_OldWF_Hgut_3_C.csv		Bacteria	Unknown Kingdom	Proteobacteria	Gammaproteobacteria	Unknown Order	Unknown Family	Unknown Genus	Unknown Species	Unknown Subspecies	2	1		TaxMP_MPAv1_OldWF_Hgut_3_C.csv
	TaxMP_MPAv1_OldWF_Hgut_3_C.csv		Eukaryota	Viridiplantae	Streptophyta	Unknown Class	Lamiales	Pedaliaceae	Sesamum	Sesamum indicum	Unknown Subspecies	2	5		TaxMP_MPAv1_OldWF_Hgut_3_C.csv
	TaxMP_MPAv1_OldWF_Hgut_3_C.csv		Eukaryota	Metazoa	Chordata	Unknown Class	Unknown Order	Unknown Family	Unknown Genus	Unknown Species	Unknown Subspecies	5	6		TaxMP_MPAv1_OldWF_Hgut_3_C.csv
	TaxMP_MPAv1_OldWF_Hgut_3_C.csv		Eukaryota	Metazoa	Chordata	Mammalia	Unknown Order	Unknown Family	Unknown Genus	Unknown Species	Unknown Subspecies	9	18		TaxMP_MPAv1_OldWF_Hgut_3_C.csv
	TaxMP_MPAv1_OldWF_Hgut_3_C.csv		Bacteria	Unknown Kingdom	Firmicutes	Clostridia	Clostridiales	Eubacteriaceae	Eubacterium	Eubacterium rectale	Eubacterium rectale ATCC 33656	3	4		TaxMP_MPAv1_OldWF_Hgut_3_C.csv
	TaxMP_MPAv1_OldWF_Hgut_3_C.csv		Eukaryota	Metazoa	Chordata	Mammalia	Rodentia	Muridae	Mus	Mus musculus	Unknown Subspecies	1	1		TaxMP_MPAv1_OldWF_Hgut_3_C.csv
	TaxMP_MPAv1_OldWF_Hgut_3_C.csv		Bacteria	Unknown Kingdom	Firmicutes	Bacilli	Bacillales	Bacillaceae	Bacillus	Unknown Species	Unknown Subspecies	1	1		TaxMP_MPAv1_OldWF_Hgut_3_C.csv
	TaxMP_MPAv1_OldWF_Hgut_3_C.csv		Eukaryota	Fungi	Ascomycota	Saccharomycetes	Saccharomycetales	Saccharomycetaceae	Kluyveromyces	Unknown Species	Unknown Subspecies	1	1		TaxMP_MPAv1_OldWF_Hgut_3_C.csv
	TaxMP_MPAv1_OldWF_Hgut_3_C.csv		Bacteria	Unknown Kingdom	Bacteroidetes	Bacteroidia	Bacteroidales	Bacteroidaceae	Bacteroides	Unknown Species	Unknown Subspecies	1	1		TaxMP_MPAv1_OldWF_Hgut_3_C.csv
	TaxMP_MPAv1_OldWF_Hgut_3_C.csv		Bacteria	Unknown Kingdom	Firmicutes	Clostridia	Clostridiales	Clostridiaceae	Clostridium	Clostridium phytofermentans	Clostridium phytofermentans ISDg	1	3		TaxMP_MPAv1_OldWF_Hgut_3_C.csv
	TaxMP_MPAv1_OldWF_Hgut_3_C.csv		Eukaryota	Metazoa	Unknown Phylum	Unknown Class	Unknown Order	Unknown Family	Unknown Genus	Unknown Species	Unknown Subspecies	4	3		TaxMP_MPAv1_OldWF_Hgut_3_C.csv
	TaxMP_MPAv1_OldWF_Hgut_3_C.csv		Eukaryota	Metazoa	Chordata	Mammalia	Unknown Order	Bovidae	Bos	Bos taurus	Unknown Subspecies	1	1		TaxMP_MPAv1_OldWF_Hgut_3_C.csv
	TaxMP_MPAv1_OldWF_Hgut_3_C.csv		Eukaryota	Metazoa	Chordata	Mammalia	Primates	Hominidae	Gorilla	Gorilla gorilla	Gorilla gorilla gorilla	1	1		TaxMP_MPAv1_OldWF_Hgut_3_C.csv
	TaxMP_MPAv1_OldWF_KompostA.csv		Unknown Superkingdom	Unknown Kingdom	Unknown Phylum	Unknown Class	Unknown Order	Unknown Family	Unknown Genus	Unknown Species	Unknown Subspecies	8	4		TaxMP_MPAv1_OldWF_KompostA.csv
	TaxMP_MPAv1_OldWF_KompostA.csv		Eukaryota	Metazoa	Chordata	Mammalia	Unknown Order	Unknown Family	Unknown Genus	Unknown Species	Unknown Subspecies	4	2		TaxMP_MPAv1_OldWF_KompostA.csv
	TaxMP_MPAv1_OldWF_KompostA.csv		Eukaryota	Fungi	Ascomycota	Sordariomycetes	Sordariales	Sordariaceae	Neurospora	Neurospora crassa	Neurospora crassa OR74A	1	1		TaxMP_MPAv1_OldWF_KompostA.csv
	TaxMP_MPAv1_OldWF_KompostA.csv		Eukaryota	Metazoa	Chordata	Mammalia	Primates	Hominidae	Unknown Genus	Unknown Species	Unknown Subspecies	2	4		TaxMP_MPAv1_OldWF_KompostA.csv
	TaxMP_MPAv1_OldWF_KompostA.csv		Eukaryota	Metazoa	Chordata	Mammalia	Primates	Hominidae	Homo	Homo sapiens	Unknown Subspecies	1	1		TaxMP_MPAv1_OldWF_KompostA.csv
	TaxMP_MPAv1_OldWF_KompostA.csv		Bacteria	Unknown Kingdom	Proteobacteria	Alphaproteobacteria	Rhodobacterales	Rhodobacteraceae	Rhodobacter	Rhodobacter sphaeroides	Rhodobacter sphaeroides ATCC 17029	1	1		TaxMP_MPAv1_OldWF_KompostA.csv
	TaxMP_MPAv1_OldWF_KompostA.csv		Eukaryota	Metazoa	Unknown Phylum	Unknown Class	Unknown Order	Unknown Family	Unknown Genus	Unknown Species	Unknown Subspecies	2	2		TaxMP_MPAv1_OldWF_KompostA.csv
	TaxMP_MPAv1_OldWF_KompostA.csv		Bacteria	Unknown Kingdom	Firmicutes	Bacilli	Bacillales	Staphylococcaceae	Staphylococcus	Staphylococcus epidermidis	Staphylococcus epidermidis ATCC 12228	1	1		TaxMP_MPAv1_OldWF_KompostA.csv
	TaxMP_MPAv1_OldWF_KompostA.csv		Eukaryota	Fungi	Ascomycota	Eurotiomycetes	Eurotiales	Trichocomaceae	Emericella	Emericella nidulans	Aspergillus nidulans FGSC A4	1	1		TaxMP_MPAv1_OldWF_KompostA.csv
	TaxMP_MPAv1_OldWF_KompostA.csv		Eukaryota	Metazoa	Chordata	Mammalia	Unknown Order	Suidae	Sus	Sus scrofa	Unknown Subspecies	1	1		TaxMP_MPAv1_OldWF_KompostA.csv
	TaxMP_MPAv1_OldWF_KompostB.csv		Eukaryota	Metazoa	Chordata	Mammalia	Unknown Order	Unknown Family	Unknown Genus	Unknown Species	Unknown Subspecies	1	1		TaxMP_MPAv1_OldWF_KompostB.csv
	TaxMP_MPAv1_OldWF_KompostB.csv		Bacteria	Unknown Kingdom	Proteobacteria	Betaproteobacteria	Burkholderiales	Alcaligenaceae	Bordetella	Bordetella pertussis	Bordetella pertussis Tohama I	1	1		TaxMP_MPAv1_OldWF_KompostB.csv
	TaxMP_MPAv1_OldWF_KompostB.csv		Eukaryota	Metazoa	Chordata	Mammalia	Primates	Hominidae	Homo	Homo sapiens	Unknown Subspecies	5	7		TaxMP_MPAv1_OldWF_KompostB.csv
	TaxMP_MPAv1_OldWF_KompostB.csv		Bacteria	Unknown Kingdom	Proteobacteria	Alphaproteobacteria	Rickettsiales	Rickettsiaceae	Rickettsia	Rickettsia prowazekii	Rickettsia prowazekii str. Madrid E	1	1		TaxMP_MPAv1_OldWF_KompostB.csv
	TaxMP_MPAv1_OldWF_KompostB.csv		Eukaryota	Metazoa	Chordata	Mammalia	Unknown Order	Bovidae	Bos	Bos taurus	Unknown Subspecies	1	2		TaxMP_MPAv1_OldWF_KompostB.csv
	TaxMP_MPAv1_OldWF_KompostB.csv		Eukaryota	Metazoa	Chordata	Mammalia	Carnivora	Canidae	Canis	Canis lupus	Canis lupus familiaris	2	4		TaxMP_MPAv1_OldWF_KompostB.csv
	TaxMP_MPAv1_OldWF_KompostC.csv
	TaxMP_MPAv1_OldWF_Soil_A.csv
	TaxMP_MPAv1_OldWF_Soil_B.csv
	TaxMP_MPAv1_OldWF_Soil_C.csv
	TaxMP_MPAv1_OldWF_WWTP_A.csv
	TaxMP_MPAv1_OldWF_WWTP_B.csv
	TaxMP_MPAv1_OldWF_WWTP_C.csv		Unknown Superkingdom	Unknown Kingdom	Unknown Phylum	Unknown Class	Unknown Order	Unknown Family	Unknown Genus	Unknown Species	Unknown Subspecies	36	64		TaxMP_MPAv1_OldWF_WWTP_C.csv
	TaxMP_MPAv1_OldWF_WWTP_C.csv		Bacteria	Unknown Kingdom	Unknown Phylum	Unknown Class	Unknown Order	Unknown Family	Unknown Genus	Unknown Species	Unknown Subspecies	2	2		TaxMP_MPAv1_OldWF_WWTP_C.csv
	TaxMP_MPAv1_OldWF_WWTP_C.csv		Eukaryota	Viridiplantae	Streptophyta	Unknown Class	Unknown Order	Unknown Family	Unknown Genus	Unknown Species	Unknown Subspecies	1	3		TaxMP_MPAv1_OldWF_WWTP_C.csv
	TaxMP_MPAv1_OldWF_WWTP_C.csv		Eukaryota	Metazoa	Chordata	Mammalia	Primates	Hominidae	Homo	Homo sapiens	Unknown Subspecies	2	2		TaxMP_MPAv1_OldWF_WWTP_C.csv
	TaxMP_MPAv1_OldWF_WWTP_C.csv		Bacteria	Unknown Kingdom	Proteobacteria	Unknown Class	Unknown Order	Unknown Family	Unknown Genus	Unknown Species	Unknown Subspecies	1	2		TaxMP_MPAv1_OldWF_WWTP_C.csv

## Sheet: COPY Raw TAX MPAv2
Content	Name	Custom.Unclassified	Custom.Superkingdom	Custom.Kingdom	Custom.Phylum	Custom.Class	Custom.Order	Custom.Family	Custom.Genus	Custom.Species	Custom.Subspecies	Custom.No. Peptides	Custom.Spectral Count (Krona)	Custom.	Custom.filename
	TaxMP_MPAv2_NewWF_BGP_1_A.csv		Uncategorized	Unknown Kingdom	Unknown Phylum	Unknown Class	Unknown Order	Unknown Family	Unknown Genus	Unknown Species	Unknown Subspecies	688	1809		TaxMP_MPAv2_NewWF_BGP_1_A.csv
	TaxMP_MPAv2_NewWF_BGP_1_A.csv		Unknown Superkingdom	Unknown Kingdom	Unknown Phylum	Unknown Class	Unknown Order	Unknown Family	Unknown Genus	Unknown Species	Unknown Subspecies	27	97		TaxMP_MPAv2_NewWF_BGP_1_A.csv
	TaxMP_MPAv2_NewWF_BGP_1_A.csv		Bacteria	Unknown Kingdom	Unknown Phylum	Unknown Class	Unknown Order	Unknown Family	Unknown Genus	Unknown Species	Unknown Subspecies	733	2278		TaxMP_MPAv2_NewWF_BGP_1_A.csv
	TaxMP_MPAv2_NewWF_BGP_1_A.csv		Viruses	Unknown Kingdom	Unknown Phylum	Unknown Class	Unknown Order	Poxviridae	Orthopoxvirus	Vaccinia virus	Unknown Subspecies	1	1		TaxMP_MPAv2_NewWF_BGP_1_A.csv
	TaxMP_MPAv2_NewWF_BGP_1_A.csv		Bacteria	Unknown Kingdom	Proteobacteria	Gammaproteobacteria	Enterobacteriales	Enterobacteriaceae	Wigglesworthia	Wigglesworthia glossinidia	Wigglesworthia glossinidia endosymbiont of Glossina brevipalpis	1	1		TaxMP_MPAv2_NewWF_BGP_1_A.csv
	TaxMP_MPAv2_NewWF_BGP_1_A.csv		Archaea	Unknown Kingdom	Euryarchaeota	Methanomicrobia	Methanosarcinales	Methanosarcinaceae	Methanosarcina	Methanosarcina acetivorans	Methanosarcina acetivorans C2A	6	8		TaxMP_MPAv2_NewWF_BGP_1_A.csv
	TaxMP_MPAv2_NewWF_BGP_1_A.csv		Eukaryota	Viridiplantae	Streptophyta	Liliopsida	Poales	Poaceae	Oryza	Oryza sativa	Oryza sativa Japonica Group	3	18		TaxMP_MPAv2_NewWF_BGP_1_A.csv
	TaxMP_MPAv2_NewWF_BGP_1_A.csv		Bacteria	Unknown Kingdom	Proteobacteria	Gammaproteobacteria	Pseudomonadales	Pseudomonadaceae	Pseudomonas	Pseudomonas fluorescens	Pseudomonas fluorescens SBW25	1	2		TaxMP_MPAv2_NewWF_BGP_1_A.csv
	TaxMP_MPAv2_NewWF_BGP_1_A.csv		Bacteria	Unknown Kingdom	Firmicutes	Clostridia	Clostridiales	Clostridiaceae	Clostridium	Clostridium tetanomorphum	Unknown Subspecies	2	4		TaxMP_MPAv2_NewWF_BGP_1_A.csv
	TaxMP_MPAv2_NewWF_BGP_1_A.csv		Bacteria	Unknown Kingdom	Fusobacteria	Fusobacteriia	Fusobacteriales	Leptotrichiaceae	Leptotrichia	Leptotrichia buccalis	Leptotrichia buccalis C-1013-b	1	1		TaxMP_MPAv2_NewWF_BGP_1_A.csv
	TaxMP_MPAv2_NewWF_BGP_1_A.csv		Bacteria	Unknown Kingdom	Firmicutes	Clostridia	Thermoanaerobacterales	Thermoanaerobacteraceae	Moorella	Moorella thermoacetica	Moorella thermoacetica ATCC 39073	4	4		TaxMP_MPAv2_NewWF_BGP_1_A.csv
	TaxMP_MPAv2_NewWF_BGP_1_A.csv		Bacteria	Unknown Kingdom	Bacteroidetes	Sphingobacteriia	Sphingobacteriales	Sphingobacteriaceae	Pedobacter	Pedobacter heparinus	Pedobacter heparinus DSM 2366	1	1		TaxMP_MPAv2_NewWF_BGP_1_A.csv
	TaxMP_MPAv2_NewWF_BGP_1_A.csv		Bacteria	Unknown Kingdom	Firmicutes	Clostridia	Clostridiales	Clostridiaceae	Clostridium	Clostridium perfringens	Clostridium perfringens str. 13	5	11		TaxMP_MPAv2_NewWF_BGP_1_A.csv
	TaxMP_MPAv2_NewWF_BGP_1_A.csv		Bacteria	Unknown Kingdom	Deinococcus-Thermus	Deinococci	Deinococcales	Deinococcaceae	Deinococcus	Deinococcus radiodurans	Deinococcus radiodurans R1	7	21		TaxMP_MPAv2_NewWF_BGP_1_A.csv
	TaxMP_MPAv2_NewWF_BGP_1_A.csv		Archaea	Unknown Kingdom	Euryarchaeota	Methanobacteria	Methanobacteriales	Methanobacteriaceae	Methanothermobacter	Methanothermobacter thermautotrophicus	Methanothermobacter thermautotrophicus str. Delta H	22	42		TaxMP_MPAv2_NewWF_BGP_1_A.csv
	TaxMP_MPAv2_NewWF_BGP_1_A.csv		Archaea	Unknown Kingdom	Crenarchaeota	Thermoprotei	Sulfolobales	Sulfolobaceae	Sulfolobus	Sulfolobus acidocaldarius	Sulfolobus acidocaldarius DSM 639	1	2		TaxMP_MPAv2_NewWF_BGP_1_A.csv
	TaxMP_MPAv2_NewWF_BGP_1_A.csv		Bacteria	Unknown Kingdom	Proteobacteria	Gammaproteobacteria	Enterobacteriales	Enterobacteriaceae	Unknown Genus	Unknown Species	Unknown Subspecies	44	107		TaxMP_MPAv2_NewWF_BGP_1_A.csv
	TaxMP_MPAv2_NewWF_BGP_1_A.csv		Bacteria	Unknown Kingdom	Bacteroidetes	Bacteroidia	Bacteroidales	Unknown Family	Unknown Genus	Unknown Species	Unknown Subspecies	10	17		TaxMP_MPAv2_NewWF_BGP_1_A.csv
	TaxMP_MPAv2_NewWF_BGP_1_A.csv		Bacteria	Unknown Kingdom	Bacteroidetes	Bacteroidia	Bacteroidales	Prevotellaceae	Prevotella	Prevotella ruminicola	Prevotella ruminicola 23	3	3		TaxMP_MPAv2_NewWF_BGP_1_A.csv
	TaxMP_MPAv2_NewWF_BGP_1_A.csv		Bacteria	Unknown Kingdom	Firmicutes	Clostridia	Clostridiales	Clostridiaceae	Clostridium	Clostridium botulinum Ba4 str. 657	Clostridium botulinum B	4	11		TaxMP_MPAv2_NewWF_BGP_1_A.csv
	TaxMP_MPAv2_NewWF_BGP_1_A.csv		Bacteria	Unknown Kingdom	Proteobacteria	Deltaproteobacteria	Myxococcales	Myxococcaceae	Myxococcus	Myxococcus xanthus	Unknown Subspecies	3	5		TaxMP_MPAv2_NewWF_BGP_1_A.csv
	TaxMP_MPAv2_NewWF_BGP_1_A.csv		Bacteria	Unknown Kingdom	Firmicutes	Clostridia	Thermoanaerobacterales	Thermodesulfobiaceae	Coprothermobacter	Coprothermobacter proteolyticus	Coprothermobacter proteolyticus DSM 5265	1	1		TaxMP_MPAv2_NewWF_BGP_1_A.csv
	TaxMP_MPAv2_NewWF_BGP_1_A.csv		Archaea	Unknown Kingdom	Euryarchaeota	Methanococci	Methanococcales	Methanocaldococcaceae	Methanocaldococcus	Methanocaldococcus jannaschii	Methanocaldococcus jannaschii DSM 2661	29	47		TaxMP_MPAv2_NewWF_BGP_1_A.csv
	TaxMP_MPAv2_NewWF_BGP_1_A.csv		Bacteria	Unknown Kingdom	Firmicutes	Clostridia	Clostridiales	Eubacteriaceae	Eubacterium	Eubacterium rectale	Eubacterium rectale ATCC 33656	1	3		TaxMP_MPAv2_NewWF_BGP_1_A.csv
	TaxMP_MPAv2_NewWF_BGP_1_A.csv		Bacteria	Unknown Kingdom	Proteobacteria	Alphaproteobacteria	Rhodobacterales	Rhodobacteraceae	Rhodobacter	Rhodobacter capsulatus	Unknown Subspecies	2	3		TaxMP_MPAv2_NewWF_BGP_1_A.csv
	TaxMP_MPAv2_NewWF_BGP_1_A.csv		Bacteria	Unknown Kingdom	Proteobacteria	Alphaproteobacteria	Rhodobacterales	Rhodobacteraceae	Rhodobacter	Rhodobacter sphaeroides	Rhodobacter sphaeroides 2.4.1	1	1		TaxMP_MPAv2_NewWF_BGP_1_A.csv
	TaxMP_MPAv2_NewWF_BGP_1_A.csv		Archaea	Unknown Kingdom	Euryarchaeota	Halobacteria	Halobacteriales	Halobacteriaceae	Haloferax	Haloferax volcanii	Haloferax volcanii DS2	7	14		TaxMP_MPAv2_NewWF_BGP_1_A.csv
	TaxMP_MPAv2_NewWF_BGP_1_A.csv		Bacteria	Unknown Kingdom	Firmicutes	Bacilli	Lactobacillales	Lactobacillaceae	Lactobacillus	Lactobacillus casei	Unknown Subspecies	1	2		TaxMP_MPAv2_NewWF_BGP_1_A.csv
	TaxMP_MPAv2_NewWF_BGP_1_A.csv		Bacteria	Unknown Kingdom	Thermotogae	Thermotogae	Thermotogales	Thermotogaceae	Thermotoga	Thermotoga neapolitana	Thermotoga neapolitana DSM 4359	2	5		TaxMP_MPAv2_NewWF_BGP_1_A.csv
	TaxMP_MPAv2_NewWF_BGP_1_A.csv		Bacteria	Unknown Kingdom	Proteobacteria	Gammaproteobacteria	Enterobacteriales	Enterobacteriaceae	Escherichia	Escherichia coli	Unknown Subspecies	21	46		TaxMP_MPAv2_NewWF_BGP_1_A.csv
	File this metaprotein originates from		Bacteria	Unknown Kingdom	Proteobacteria	Betaproteobacteria	Burkholderiales	Comamonadaceae	Verminephrobacter	Verminephrobacter eiseniae	Verminephrobacter eiseniae EF01-2	2	2		TaxMP_MPAv2_NewWF_BGP_1_A.csv
	TaxMP_MPAv2_NewWF_BGP_1_A.csv		Eukaryota	Fungi	Ascomycota	Eurotiomycetes	Eurotiales	Trichocomaceae	Aspergillus	Aspergillus oryzae	Aspergillus oryzae RIB40	2	3		TaxMP_MPAv2_NewWF_BGP_1_A.csv
	TaxMP_MPAv2_NewWF_BGP_1_A.csv		Bacteria	Unknown Kingdom	Proteobacteria	Alphaproteobacteria	Unknown Order	Unknown Family	Unknown Genus	Unknown Species	Unknown Subspecies	1	4		TaxMP_MPAv2_NewWF_BGP_1_A.csv
	TaxMP_MPAv2_NewWF_BGP_1_A.csv		Bacteria	Unknown Kingdom	Firmicutes	Bacilli	Lactobacillales	Lactobacillaceae	Lactobacillus	Lactobacillus fermentum	Lactobacillus fermentum IFO 3956	1	2		TaxMP_MPAv2_NewWF_BGP_1_A.csv
	TaxMP_MPAv2_NewWF_BGP_1_A.csv		Bacteria	Unknown Kingdom	Proteobacteria	Alphaproteobacteria	Rickettsiales	Rickettsiaceae	Rickettsia	Rickettsia conorii	Rickettsia conorii str. Malish 7	1	2		TaxMP_MPAv2_NewWF_BGP_1_A.csv
	TaxMP_MPAv2_NewWF_BGP_1_A.csv		Bacteria	Unknown Kingdom	Firmicutes	Bacilli	Bacillales	Bacillaceae	Bacillus	Bacillus subtilis subsp. subtilis str. 168	Bacillus subtilis subsp. subtilis	148	359		TaxMP_MPAv2_NewWF_BGP_1_A.csv
	TaxMP_MPAv2_NewWF_BGP_1_A.csv		Archaea	Unknown Kingdom	Euryarchaeota	Methanobacteria	Methanobacteriales	Methanobacteriaceae	Methanothermobacter	Methanothermobacter marburgensis	Methanothermobacter marburgensis str. Marburg	5	8		TaxMP_MPAv2_NewWF_BGP_1_A.csv
	TaxMP_MPAv2_NewWF_BGP_1_A.csv		Eukaryota	Metazoa	Arthropoda	Insecta	Diptera	Drosophilidae	Drosophila	Drosophila melanogaster	Unknown Subspecies	6	12		TaxMP_MPAv2_NewWF_BGP_1_A.csv
	TaxMP_MPAv2_NewWF_BGP_1_A.csv		Bacteria	Unknown Kingdom	Proteobacteria	Deltaproteobacteria	Unknown Order	Unknown Family	Unknown Genus	Unknown Species	Unknown Subspecies	1	2		TaxMP_MPAv2_NewWF_BGP_1_A.csv
	TaxMP_MPAv2_NewWF_BGP_1_A.csv		Bacteria	Unknown Kingdom	Proteobacteria	Alphaproteobacteria	Rhodospirillales	Rhodospirillaceae	Rhodospirillum	Rhodospirillum rubrum	Unknown Subspecies	2	3		TaxMP_MPAv2_NewWF_BGP_1_A.csv
	TaxMP_MPAv2_NewWF_BGP_1_A.csv		Viruses	Unknown Kingdom	Unknown Phylum	Unknown Class	Unknown Order	Mimiviridae	Mimivirus	Acanthamoeba polyphaga mimivirus	Unknown Subspecies	2	7		TaxMP_MPAv2_NewWF_BGP_1_A.csv
	TaxMP_MPAv2_NewWF_BGP_1_A.csv		Eukaryota	Viridiplantae	Streptophyta	Unknown Class	Vitales	Vitaceae	Vitis	Vitis vinifera	Unknown Subspecies	1	1		TaxMP_MPAv2_NewWF_BGP_1_A.csv
	TaxMP_MPAv2_NewWF_BGP_1_A.csv		Bacteria	Unknown Kingdom	Actinobacteria	Actinobacteria	Actinomycetales	Nocardioidaceae	Nocardioides	Nocardioides sp. JS614	Unknown Subspecies	1	1		TaxMP_MPAv2_NewWF_BGP_1_A.csv
	TaxMP_MPAv2_NewWF_BGP_1_A.csv		Bacteria	Unknown Kingdom	Chloroflexi	Chloroflexi	Herpetosiphonales	Herpetosiphonaceae	Herpetosiphon	Herpetosiphon aurantiacus	Unknown Subspecies	1	1		TaxMP_MPAv2_NewWF_BGP_1_A.csv
	TaxMP_MPAv2_NewWF_BGP_1_A.csv		Bacteria	Unknown Kingdom	Proteobacteria	Gammaproteobacteria	Xanthomonadales	Xanthomonadaceae	Lysobacter	Lysobacter enzymogenes	Unknown Subspecies	1	1		TaxMP_MPAv2_NewWF_BGP_1_A.csv
	TaxMP_MPAv2_NewWF_BGP_1_A.csv		Viruses	Unknown Kingdom	Unknown Phylum	Unknown Class	Unknown Order	Iridoviridae	Ranavirus	Frog virus 3	Frog virus 3 (isolate Goorha)	1	1		TaxMP_MPAv2_NewWF_BGP_1_A.csv
	TaxMP_MPAv2_NewWF_BGP_1_A.csv		Archaea	Unknown Kingdom	Euryarchaeota	Archaeoglobi	Archaeoglobales	Archaeoglobaceae	Archaeoglobus	Archaeoglobus fulgidus	Archaeoglobus fulgidus DSM 4304	8	11		TaxMP_MPAv2_NewWF_BGP_1_A.csv
	TaxMP_MPAv2_NewWF_BGP_1_A.csv		Bacteria	Unknown Kingdom	Aquificae	Aquificae	Aquificales	Aquificaceae	Aquifex	Aquifex aeolicus	Aquifex aeolicus VF5	1	3		TaxMP_MPAv2_NewWF_BGP_1_A.csv
	TaxMP_MPAv2_NewWF_BGP_1_A.csv		Bacteria	Unknown Kingdom	Proteobacteria	Gammaproteobacteria	Pseudomonadales	Pseudomonadaceae	Pseudomonas	Pseudomonas aeruginosa	Pseudomonas aeruginosa PAO1	6	7		TaxMP_MPAv2_NewWF_BGP_1_A.csv
	TaxMP_MPAv2_NewWF_BGP_1_A.csv		Bacteria	Unknown Kingdom	Tenericutes	Mollicutes	Mycoplasmatales	Mycoplasmataceae	Mycoplasma	Mycoplasma synoviae	Mycoplasma synoviae 53	1	1		TaxMP_MPAv2_NewWF_BGP_1_A.csv
	TaxMP_MPAv2_NewWF_BGP_1_A.csv		Bacteria	Unknown Kingdom	Proteobacteria	Deltaproteobacteria	Desulfuromonadales	Geobacteraceae	Geobacter	Unknown Species	Unknown Subspecies	1	2		TaxMP_MPAv2_NewWF_BGP_1_A.csv
	TaxMP_MPAv2_NewWF_BGP_1_A.csv		Bacteria	Unknown Kingdom	Spirochaetes	Spirochaetia	Spirochaetales	Spirochaetaceae	Treponema	Treponema denticola	Treponema denticola ATCC 35405	1	1		TaxMP_MPAv2_NewWF_BGP_1_A.csv
	TaxMP_MPAv2_NewWF_BGP_1_A.csv		Bacteria	Unknown Kingdom	Thermotogae	Thermotogae	Thermotogales	Thermotogaceae	Thermotoga	Thermotoga maritima	Thermotoga maritima MSB8	33	65		TaxMP_MPAv2_NewWF_BGP_1_A.csv
	TaxMP_MPAv2_NewWF_BGP_1_A.csv		Bacteria	Unknown Kingdom	Tenericutes	Mollicutes	Mycoplasmatales	Mycoplasmataceae	Mycoplasma	Mycoplasma genitalium	Mycoplasma genitalium G37	1	2		TaxMP_MPAv2_NewWF_BGP_1_A.csv
	TaxMP_MPAv2_NewWF_BGP_1_A.csv		Archaea	Unknown Kingdom	Euryarchaeota	Thermococci	Thermococcales	Thermococcaceae	Thermococcus	Thermococcus litoralis	Thermococcus litoralis DSM 5473	16	34		TaxMP_MPAv2_NewWF_BGP_1_A.csv
	TaxMP_MPAv2_NewWF_BGP_1_A.csv		Bacteria	Unknown Kingdom	Firmicutes	Clostridia	Clostridiales	Heliobacteriaceae	Heliobacterium	Heliobacterium modesticaldum	Heliobacterium modesticaldum Ice1	2	2		TaxMP_MPAv2_NewWF_BGP_1_A.csv
	TaxMP_MPAv2_NewWF_BGP_1_A.csv		Bacteria	Unknown Kingdom	Spirochaetes	Spirochaetia	Spirochaetales	Spirochaetaceae	Treponema	Treponema pallidum subsp. pallidum str. Nichols	Treponema pallidum subsp. pallidum	33	93		TaxMP_MPAv2_NewWF_BGP_1_A.csv
	TaxMP_MPAv2_NewWF_BGP_1_A.csv		Bacteria	Unknown Kingdom	Firmicutes	Bacilli	Lactobacillales	Streptococcaceae	Streptococcus	Streptococcus mutans	Streptococcus mutans UA159	5	9		TaxMP_MPAv2_NewWF_BGP_1_A.csv
	TaxMP_MPAv2_NewWF_BGP_1_A.csv		Bacteria	Unknown Kingdom	Proteobacteria	Alphaproteobacteria	Rhizobiales	Rhizobiaceae	Sinorhizobium	Sinorhizobium meliloti	Sinorhizobium meliloti 1021	16	41		TaxMP_MPAv2_NewWF_BGP_1_A.csv
	TaxMP_MPAv2_NewWF_BGP_1_A.csv		Bacteria	Unknown Kingdom	Firmicutes	Bacilli	Bacillales	Staphylococcaceae	Staphylococcus	Staphylococcus aureus	Staphylococcus aureus subsp. aureus	4	7		TaxMP_MPAv2_NewWF_BGP_1_A.csv
	TaxMP_MPAv2_NewWF_BGP_1_A.csv		Eukaryota	Metazoa	Nematoda	Chromadorea	Rhabditida	Rhabditidae	Caenorhabditis	Caenorhabditis briggsae	Unknown Subspecies	1	1		TaxMP_MPAv2_NewWF_BGP_1_A.csv
	TaxMP_MPAv2_NewWF_BGP_1_A.csv		Eukaryota	Metazoa	Chordata	Mammalia	Unknown Order	Suidae	Sus	Sus scrofa	Unknown Subspecies	3	3		TaxMP_MPAv2_NewWF_BGP_1_A.csv
	TaxMP_MPAv2_NewWF_BGP_1_A.csv		Eukaryota	Metazoa	Nematoda	Chromadorea	Rhabditida	Rhabditidae	Caenorhabditis	Caenorhabditis elegans	Unknown Subspecies	1	2		TaxMP_MPAv2_NewWF_BGP_1_A.csv
	TaxMP_MPAv2_NewWF_BGP_1_A.csv		Bacteria	Unknown Kingdom	Firmicutes	Clostridia	Clostridiales	Clostridiaceae	Clostridium	Clostridium perfringens	Clostridium perfringens SM101	1	1		TaxMP_MPAv2_NewWF_BGP_1_A.csv
	TaxMP_MPAv2_NewWF_BGP_1_A.csv		Bacteria	Unknown Kingdom	Firmicutes	Bacilli	Bacillales	Listeriaceae	Listeria	Unknown Species	Unknown Subspecies	2	3		TaxMP_MPAv2_NewWF_BGP_1_A.csv
	TaxMP_MPAv2_NewWF_BGP_1_A.csv		Bacteria	Unknown Kingdom	Firmicutes	Clostridia	Clostridiales	Clostridiaceae	Clostridium	Clostridium beijerinckii	Clostridium beijerinckii NCIMB 8052	2	3		TaxMP_MPAv2_NewWF_BGP_1_A.csv
	TaxMP_MPAv2_NewWF_BGP_1_A.csv		Archaea	Unknown Kingdom	Euryarchaeota	Thermococci	Thermococcales	Thermococcaceae	Pyrococcus	Pyrococcus sp. GB-3A	Unknown Subspecies	1	5		TaxMP_MPAv2_NewWF_BGP_1_A.csv
	TaxMP_MPAv2_NewWF_BGP_1_A.csv		Viruses	Unknown Kingdom	Unknown Phylum	Unknown Class	Caudovirales	Siphoviridae	Unknown Genus	Staphylococcus phage phiMR11	Unknown Subspecies	4	6		TaxMP_MPAv2_NewWF_BGP_1_A.csv
	TaxMP_MPAv2_NewWF_BGP_1_A.csv		Archaea	Unknown Kingdom	Euryarchaeota	Methanobacteria	Methanobacteriales	Unknown Family	Unknown Genus	Unknown Species	Unknown Subspecies	6	18		TaxMP_MPAv2_NewWF_BGP_1_A.csv
	TaxMP_MPAv2_NewWF_BGP_1_A.csv		Bacteria	Unknown Kingdom	Firmicutes	Clostridia	Clostridiales	Clostridiales Family XVIII. Incertae Sedis	Symbiobacterium	Symbiobacterium thermophilum	Symbiobacterium thermophilum IAM 14863	1	2		TaxMP_MPAv2_NewWF_BGP_1_A.csv
	TaxMP_MPAv2_NewWF_BGP_1_A.csv		Bacteria	Unknown Kingdom	Proteobacteria	Gammaproteobacteria	Enterobacteriales	Enterobacteriaceae	Shigella	Shigella flexneri	Unknown Subspecies	2	5		TaxMP_MPAv2_NewWF_BGP_1_A.csv
	TaxMP_MPAv2_NewWF_BGP_1_A.csv		Bacteria	Unknown Kingdom	Proteobacteria	Gammaproteobacteria	Alteromonadales	Alteromonadaceae	Marinobacter	Marinobacter hydrocarbonoclasticus	Marinobacter aquaeolei VT8	1	1		TaxMP_MPAv2_NewWF_BGP_1_A.csv
	TaxMP_MPAv2_NewWF_BGP_1_A.csv		Bacteria	Unknown Kingdom	Cyanobacteria	Unknown Class	Chroococcales	Unknown Family	Synechococcus	Synechococcus elongatus	Synechococcus elongatus PCC 7942	1	1		TaxMP_MPAv2_NewWF_BGP_1_A.csv
	TaxMP_MPAv2_NewWF_BGP_1_A.csv		Bacteria	Unknown Kingdom	Proteobacteria	Betaproteobacteria	Burkholderiales	Comamonadaceae	Acidovorax	Unknown Species	Unknown Subspecies	1	1		TaxMP_MPAv2_NewWF_BGP_1_A.csv
	TaxMP_MPAv2_NewWF_BGP_1_A.csv		Archaea	Unknown Kingdom	Euryarchaeota	Methanococci	Methanococcales	Methanococcaceae	Methanococcus	Methanococcus maripaludis	Methanococcus maripaludis S2	1	1		TaxMP_MPAv2_NewWF_BGP_1_A.csv
	TaxMP_MPAv2_NewWF_BGP_1_A.csv		Eukaryota	Viridiplantae	Streptophyta	Unknown Class	Brassicales	Brassicaceae	Arabidopsis	Arabidopsis thaliana	Unknown Subspecies	18	36		TaxMP_MPAv2_NewWF_BGP_1_A.csv
	TaxMP_MPAv2_NewWF_BGP_1_A.csv		Bacteria	Unknown Kingdom	Tenericutes	Mollicutes	Mycoplasmatales	Mycoplasmataceae	Mycoplasma	Mycoplasma hominis	Mycoplasma hominis ATCC 23114	3	5		TaxMP_MPAv2_NewWF_BGP_1_A.csv
	TaxMP_MPAv2_NewWF_BGP_1_A.csv		Bacteria	Unknown Kingdom	Proteobacteria	Alphaproteobacteria	Rhodobacterales	Rhodobacteraceae	Paracoccus	Paracoccus denitrificans	Paracoccus denitrificans PD1222	1	2		TaxMP_MPAv2_NewWF_BGP_1_A.csv
	TaxMP_MPAv2_NewWF_BGP_1_A.csv		Archaea	Unknown Kingdom	Euryarchaeota	Methanomicrobia	Methanosarcinales	Methanosaetaceae	Methanosaeta	Methanosaeta thermophila	Methanosaeta thermophila PT	1	1		TaxMP_MPAv2_NewWF_BGP_1_A.csv
	TaxMP_MPAv2_NewWF_BGP_1_A.csv		Eukaryota	Unknown Kingdom	Unknown Phylum	Unknown Class	Unknown Order	Unknown Family	Entamoeba	Entamoeba histolytica	Unknown Subspecies	5	10		TaxMP_MPAv2_NewWF_BGP_1_A.csv
	TaxMP_MPAv2_NewWF_BGP_1_A.csv		Bacteria	Unknown Kingdom	Firmicutes	Bacilli	Bacillales	Paenibacillaceae	Brevibacillus	Brevibacillus choshinensis	Unknown Subspecies	2	2		TaxMP_MPAv2_NewWF_BGP_1_A.csv
	TaxMP_MPAv2_NewWF_BGP_1_A.csv		Bacteria	Unknown Kingdom	Proteobacteria	Gammaproteobacteria	Alteromonadales	Shewanellaceae	Shewanella	Shewanella oneidensis	Shewanella oneidensis MR-1	1	1		TaxMP_MPAv2_NewWF_BGP_1_A.csv
	TaxMP_MPAv2_NewWF_BGP_1_A.csv		Archaea	Unknown Kingdom	Euryarchaeota	Methanobacteria	Methanobacteriales	Methanothermaceae	Methanothermus	Unknown Species	Unknown Subspecies	1	2		TaxMP_MPAv2_NewWF_BGP_1_A.csv
	TaxMP_MPAv2_NewWF_BGP_1_A.csv		Archaea	Unknown Kingdom	Euryarchaeota	Thermococci	Thermococcales	Thermococcaceae	Pyrococcus	Pyrococcus furiosus	Pyrococcus furiosus DSM 3638	13	31		TaxMP_MPAv2_NewWF_BGP_1_A.csv
	TaxMP_MPAv2_NewWF_BGP_1_A.csv		Eukaryota	Metazoa	Chordata	Mammalia	Unknown Order	Unknown Family	Unknown Genus	Unknown Species	Unknown Subspecies	2	3		TaxMP_MPAv2_NewWF_BGP_1_A.csv
	TaxMP_MPAv2_NewWF_BGP_1_A.csv		Archaea	Unknown Kingdom	Euryarchaeota	Methanobacteria	Methanobacteriales	Methanothermaceae	Methanothermus	Methanothermus fervidus	Unknown Subspecies	14	82		TaxMP_MPAv2_NewWF_BGP_1_A.csv
	TaxMP_MPAv2_NewWF_BGP_1_A.csv		Eukaryota	Fungi	Ascomycota	Schizosaccharomycetes	Schizosaccharomycetales	Schizosaccharomycetaceae	Schizosaccharomyces	Schizosaccharomyces pombe	Schizosaccharomyces pombe 972h-	1	3		TaxMP_MPAv2_NewWF_BGP_1_A.csv
	TaxMP_MPAv2_NewWF_BGP_1_A.csv		Bacteria	Unknown Kingdom	Spirochaetes	Spirochaetia	Spirochaetales	Spirochaetaceae	Unknown Genus	Unknown Species	Unknown Subspecies	1	1		TaxMP_MPAv2_NewWF_BGP_1_A.csv
	TaxMP_MPAv2_NewWF_BGP_1_A.csv		Bacteria	Unknown Kingdom	Firmicutes	Clostridia	Halanaerobiales	Halanaerobiaceae	Halothermothrix	Halothermothrix orenii	Halothermothrix orenii H 168	1	1		TaxMP_MPAv2_NewWF_BGP_1_A.csv
	TaxMP_MPAv2_NewWF_BGP_1_A.csv		Bacteria	Unknown Kingdom	Cyanobacteria	Unknown Class	Chroococcales	Unknown Family	Synechocystis	Synechocystis sp. PCC 6803	Synechocystis sp. PCC 6803 substr. Kazusa	7	15		TaxMP_MPAv2_NewWF_BGP_1_A.csv
	TaxMP_MPAv2_NewWF_BGP_1_A.csv		Bacteria	Unknown Kingdom	Proteobacteria	Gammaproteobacteria	Enterobacteriales	Enterobacteriaceae	Shigella	Shigella flexneri 5 str. 8401	Shigella flexneri 5	5	13		TaxMP_MPAv2_NewWF_BGP_1_A.csv
	TaxMP_MPAv2_NewWF_BGP_1_A.csv		Archaea	Unknown Kingdom	Euryarchaeota	Methanomicrobia	Methanomicrobiales	Unknown Family	Unknown Genus	Unknown Species	Unknown Subspecies	1	1		TaxMP_MPAv2_NewWF_BGP_1_A.csv
	TaxMP_MPAv2_NewWF_BGP_1_A.csv		Bacteria	Unknown Kingdom	Firmicutes	Negativicutes	Selenomonadales	Acidaminococcaceae	Acidaminococcus	Acidaminococcus fermentans	Acidaminococcus fermentans DSM 20731	4	6		TaxMP_MPAv2_NewWF_BGP_1_A.csv
	TaxMP_MPAv2_NewWF_BGP_1_A.csv		Eukaryota	Unknown Kingdom	Unknown Phylum	Unknown Class	Dictyosteliida	Unknown Family	Dictyostelium	Dictyostelium discoideum	Unknown Subspecies	8	13		TaxMP_MPAv2_NewWF_BGP_1_A.csv
	TaxMP_MPAv2_NewWF_BGP_1_A.csv		Eukaryota	Viridiplantae	Streptophyta	Bryopsida	Funariales	Funariaceae	Physcomitrella	Physcomitrella patens	Unknown Subspecies	1	2		TaxMP_MPAv2_NewWF_BGP_1_A.csv
	TaxMP_MPAv2_NewWF_BGP_1_A.csv		Bacteria	Unknown Kingdom	Proteobacteria	Gammaproteobacteria	Alteromonadales	Shewanellaceae	Shewanella	Shewanella sediminis	Shewanella sediminis HAW-EB3	1	2		TaxMP_MPAv2_NewWF_BGP_1_A.csv
	TaxMP_MPAv2_NewWF_BGP_1_A.csv		Archaea	Unknown Kingdom	Euryarchaeota	Methanomicrobia	Methanosarcinales	Methanosarcinaceae	Unknown Genus	Unknown Species	Unknown Subspecies	3	7		TaxMP_MPAv2_NewWF_BGP_1_A.csv
	TaxMP_MPAv2_NewWF_BGP_1_A.csv		Archaea	Unknown Kingdom	Euryarchaeota	Methanomicrobia	Methanosarcinales	Methanosarcinaceae	Methanosarcina	Unknown Species	Unknown Subspecies	117	393		TaxMP_MPAv2_NewWF_BGP_1_A.csv
	TaxMP_MPAv2_NewWF_BGP_1_A.csv		Archaea	Unknown Kingdom	Euryarchaeota	Methanomicrobia	Methanosarcinales	Methanosarcinaceae	Methanosarcina	Methanosarcina barkeri	Unknown Subspecies	1	1		TaxMP_MPAv2_NewWF_BGP_1_A.csv
	TaxMP_MPAv2_NewWF_BGP_1_A.csv		Bacteria	Unknown Kingdom	Proteobacteria	Gammaproteobacteria	Vibrionales	Vibrionaceae	Vibrio	Vibrio vulnificus	Unknown Subspecies	3	13		TaxMP_MPAv2_NewWF_BGP_1_A.csv
	TaxMP_MPAv2_NewWF_BGP_1_A.csv		Bacteria	Unknown Kingdom	Firmicutes	Clostridia	Clostridiales	Clostridiaceae	Clostridium	Clostridium aminobutyricum	Unknown Subspecies	1	3		TaxMP_MPAv2_NewWF_BGP_1_A.csv
	TaxMP_MPAv2_NewWF_BGP_1_A.csv		Archaea	Unknown Kingdom	Euryarchaeota	Methanomicrobia	Methanosarcinales	Methanosarcinaceae	Methanosarcina	Methanosarcina thermophila	Unknown Subspecies	3	8		TaxMP_MPAv2_NewWF_BGP_1_A.csv
	TaxMP_MPAv2_NewWF_BGP_1_A.csv		Eukaryota	Metazoa	Chordata	Amphibia	Anura	Pipidae	Xenopus	Xenopus laevis	Unknown Subspecies	1	1		TaxMP_MPAv2_NewWF_BGP_1_A.csv
	TaxMP_MPAv2_NewWF_BGP_1_A.csv		Eukaryota	Viridiplantae	Streptophyta	Unknown Class	Unknown Order	Unknown Family	Unknown Genus	Unknown Species	Unknown Subspecies	1	3		TaxMP_MPAv2_NewWF_BGP_1_A.csv
	TaxMP_MPAv2_NewWF_BGP_1_A.csv		Bacteria	Unknown Kingdom	Proteobacteria	Betaproteobacteria	Neisseriales	Neisseriaceae	Chromobacterium	Chromobacterium violaceum	Chromobacterium violaceum ATCC 12472	1	1		TaxMP_MPAv2_NewWF_BGP_1_A.csv
	TaxMP_MPAv2_NewWF_BGP_1_A.csv		Bacteria	Unknown Kingdom	Firmicutes	Clostridia	Thermoanaerobacterales	Thermoanaerobacteraceae	Caldanaerobacter	Thermoanaerobacter tengcongensis MB4	Caldanaerobacter subterraneus subsp. tengcongensis	4	6		TaxMP_MPAv2_NewWF_BGP_1_A.csv
	TaxMP_MPAv2_NewWF_BGP_1_A.csv		Bacteria	Unknown Kingdom	Proteobacteria	Epsilonproteobacteria	Campylobacterales	Campylobacteraceae	Campylobacter	Campylobacter jejuni subsp. doylei 269.97	Campylobacter jejuni subsp. doylei	1	1		TaxMP_MPAv2_NewWF_BGP_1_A.csv
	TaxMP_MPAv2_NewWF_BGP_1_A.csv		Bacteria	Unknown Kingdom	Proteobacteria	Alphaproteobacteria	Rhizobiales	Rhizobiaceae	Agrobacterium	Agrobacterium fabrum	Agrobacterium fabrum str. C58	7	18		TaxMP_MPAv2_NewWF_BGP_1_A.csv
	TaxMP_MPAv2_NewWF_BGP_1_A.csv		Bacteria	Unknown Kingdom	Firmicutes	Bacilli	Bacillales	Bacillaceae	Bacillus	Bacillus halodurans	Bacillus halodurans C-125	13	24		TaxMP_MPAv2_NewWF_BGP_1_A.csv
	TaxMP_MPAv2_NewWF_BGP_1_A.csv		Eukaryota	Metazoa	Chordata	Amphibia	Anura	Pipidae	Xenopus	Xenopus (Silurana) tropicalis	Unknown Subspecies	1	1		TaxMP_MPAv2_NewWF_BGP_1_A.csv
	TaxMP_MPAv2_NewWF_BGP_1_A.csv		Bacteria	Unknown Kingdom	Firmicutes	Clostridia	Clostridiales	Syntrophomonadaceae	Syntrophomonas	Syntrophomonas wolfei subsp. wolfei str. Goettingen	Syntrophomonas wolfei subsp. wolfei	9	18		TaxMP_MPAv2_NewWF_BGP_1_A.csv
	TaxMP_MPAv2_NewWF_BGP_1_A.csv		Bacteria	Unknown Kingdom	Proteobacteria	Deltaproteobacteria	Syntrophobacterales	Syntrophobacteraceae	Syntrophobacter	Syntrophobacter fumaroxidans	Syntrophobacter fumaroxidans MPOB	2	3		TaxMP_MPAv2_NewWF_BGP_1_A.csv
	TaxMP_MPAv2_NewWF_BGP_1_A.csv		Eukaryota	Viridiplantae	Streptophyta	Unknown Class	Unknown Order	Unknown Family	Unknown Genus	Unknown Species	Unknown Subspecies	1	2		TaxMP_MPAv2_NewWF_BGP_1_A.csv
	TaxMP_MPAv2_NewWF_BGP_1_A.csv		Viruses	Unknown Kingdom	Unknown Phylum	Unknown Class	Caudovirales	Siphoviridae	Lambdalikevirus	Enterobacteria phage HK97	Unknown Subspecies	1	1		TaxMP_MPAv2_NewWF_BGP_1_A.csv
	TaxMP_MPAv2_NewWF_BGP_1_A.csv		Eukaryota	Fungi	Ascomycota	Saccharomycetes	Saccharomycetales	Saccharomycetaceae	Saccharomyces	Saccharomyces cerevisiae	Saccharomyces cerevisiae S288c	2	3		TaxMP_MPAv2_NewWF_BGP_1_A.csv
	TaxMP_MPAv2_NewWF_BGP_1_A.csv		Bacteria	Unknown Kingdom	Thermotogae	Thermotogae	Thermotogales	Thermotogaceae	Thermosipho	Thermosipho africanus	Thermosipho africanus TCF52B	1	1		TaxMP_MPAv2_NewWF_BGP_1_A.csv
	TaxMP_MPAv2_NewWF_BGP_1_A.csv		Bacteria	Unknown Kingdom	Firmicutes	Clostridia	Clostridiales	Clostridiaceae	Clostridium	Clostridium acetobutylicum	Clostridium acetobutylicum ATCC 824	25	41		TaxMP_MPAv2_NewWF_BGP_1_A.csv
	TaxMP_MPAv2_NewWF_BGP_1_A.csv		Bacteria	Unknown Kingdom	Firmicutes	Clostridia	Clostridiales	Peptostreptococcaceae	Unknown Genus	[Clostridium] difficile	Clostridium difficile 630	4	12		TaxMP_MPAv2_NewWF_BGP_1_A.csv
	TaxMP_MPAv2_NewWF_BGP_1_A.csv		Bacteria	Unknown Kingdom	Firmicutes	Clostridia	Clostridiales	Peptococcaceae	Desulfitobacterium	Desulfitobacterium hafniense	Unknown Subspecies	1	1		TaxMP_MPAv2_NewWF_BGP_1_A.csv
	TaxMP_MPAv2_NewWF_BGP_1_A.csv		Eukaryota	Fungi	Basidiomycota	Agaricomycetes	Corticiales	Corticiaceae	Phanerochaete	Phanerochaete chrysosporium	Unknown Subspecies	1	1		TaxMP_MPAv2_NewWF_BGP_1_A.csv
	TaxMP_MPAv2_NewWF_BGP_1_A.csv		Bacteria	Unknown Kingdom	Firmicutes	Clostridia	Clostridiales	Eubacteriaceae	Eubacterium	Eubacterium acidaminophilum	Unknown Subspecies	7	49		TaxMP_MPAv2_NewWF_BGP_1_A.csv
	TaxMP_MPAv2_NewWF_BGP_1_A.csv		Bacteria	Unknown Kingdom	Proteobacteria	Betaproteobacteria	Burkholderiales	Burkholderiaceae	Ralstonia	Ralstonia pickettii	Ralstonia pickettii 12J	1	1		TaxMP_MPAv2_NewWF_BGP_1_A.csv
	TaxMP_MPAv2_NewWF_BGP_1_A.csv		Eukaryota	Unknown Kingdom	Unknown Phylum	Unknown Class	Unknown Order	Unknown Family	Unknown Genus	Unknown Species	Unknown Subspecies	10	18		TaxMP_MPAv2_NewWF_BGP_1_A.csv
	TaxMP_MPAv2_NewWF_BGP_1_A.csv		Bacteria	Unknown Kingdom	Proteobacteria	Unknown Class	Unknown Order	Unknown Family	Unknown Genus	Unknown Species	Unknown Subspecies	49	185		TaxMP_MPAv2_NewWF_BGP_1_A.csv
	TaxMP_MPAv2_NewWF_BGP_1_A.csv		Bacteria	Unknown Kingdom	Firmicutes	Bacilli	Lactobacillales	Streptococcaceae	Streptococcus	Streptococcus pneumoniae	Streptococcus pneumoniae TIGR4	12	22		TaxMP_MPAv2_NewWF_BGP_1_A.csv
	TaxMP_MPAv2_NewWF_BGP_1_A.csv		Bacteria	Unknown Kingdom	Firmicutes	Clostridia	Clostridiales	Clostridiaceae	Clostridium	Clostridium saccharobutylicum	Unknown Subspecies	2	3		TaxMP_MPAv2_NewWF_BGP_1_A.csv
	TaxMP_MPAv2_NewWF_BGP_1_A.csv		Eukaryota	Fungi	Ascomycota	Sordariomycetes	Sordariales	Chaetomiaceae	Chaetomium	Chaetomium globosum	Chaetomium globosum CBS 148.51	3	3		TaxMP_MPAv2_NewWF_BGP_1_A.csv
	TaxMP_MPAv2_NewWF_BGP_1_A.csv		Bacteria	Unknown Kingdom	Proteobacteria	Epsilonproteobacteria	Campylobacterales	Helicobacteraceae	Helicobacter	Helicobacter pylori	Unknown Subspecies	2	2		TaxMP_MPAv2_NewWF_BGP_1_A.csv
	TaxMP_MPAv2_NewWF_BGP_1_A.csv		Bacteria	Unknown Kingdom	Bacteroidetes	Flavobacteriia	Flavobacteriales	Flavobacteriaceae	Zobellia	Zobellia galactanivorans	Unknown Subspecies	1	3		TaxMP_MPAv2_NewWF_BGP_1_A.csv
	TaxMP_MPAv2_NewWF_BGP_1_A.csv		Archaea	Unknown Kingdom	Euryarchaeota	Thermococci	Thermococcales	Thermococcaceae	Unknown Genus	Unknown Species	Unknown Subspecies	4	6		TaxMP_MPAv2_NewWF_BGP_1_A.csv
	TaxMP_MPAv2_NewWF_BGP_1_A.csv		Bacteria	Unknown Kingdom	Proteobacteria	Betaproteobacteria	Burkholderiales	Burkholderiaceae	Burkholderia	Burkholderia ambifaria	Burkholderia ambifaria AMMD	1	1		TaxMP_MPAv2_NewWF_BGP_1_A.csv
	TaxMP_MPAv2_NewWF_BGP_1_A.csv		Archaea	Unknown Kingdom	Euryarchaeota	Thermococci	Thermococcales	Thermococcaceae	Pyrococcus	Unknown Species	Unknown Subspecies	11	28		TaxMP_MPAv2_NewWF_BGP_1_A.csv
	TaxMP_MPAv2_NewWF_BGP_1_A.csv		Eukaryota	Metazoa	Chordata	Mammalia	Unknown Order	Bovidae	Ovis	Ovis aries	Unknown Subspecies	2	4		TaxMP_MPAv2_NewWF_BGP_1_A.csv
	TaxMP_MPAv2_NewWF_BGP_1_A.csv		Bacteria	Unknown Kingdom	Proteobacteria	Gammaproteobacteria	Unknown Order	Unknown Family	Unknown Genus	Unknown Species	Unknown Subspecies	14	34		TaxMP_MPAv2_NewWF_BGP_1_A.csv
	TaxMP_MPAv2_NewWF_BGP_1_A.csv		Bacteria	Unknown Kingdom	Firmicutes	Unknown Class	Unknown Order	Unknown Family	Unknown Genus	Unknown Species	Unknown Subspecies	114	372		TaxMP_MPAv2_NewWF_BGP_1_A.csv
	TaxMP_MPAv2_NewWF_BGP_1_A.csv		Archaea	Unknown Kingdom	Euryarchaeota	Unknown Class	Unknown Order	Unknown Family	Unknown Genus	Unknown Species	Unknown Subspecies	146	614		TaxMP_MPAv2_NewWF_BGP_1_A.csv
	TaxMP_MPAv2_NewWF_BGP_1_A.csv		Bacteria	Unknown Kingdom	Firmicutes	Clostridia	Thermoanaerobacterales	Thermoanaerobacteraceae	Thermoanaerobacter	Unknown Species	Unknown Subspecies	2	2		TaxMP_MPAv2_NewWF_BGP_1_A.csv
	TaxMP_MPAv2_NewWF_BGP_1_A.csv		Bacteria	Unknown Kingdom	Proteobacteria	Epsilonproteobacteria	Campylobacterales	Campylobacteraceae	Campylobacter	Campylobacter jejuni subsp. jejuni NCTC 11168 = ATCC 700819	Campylobacter jejuni subsp. jejuni	1	4		TaxMP_MPAv2_NewWF_BGP_1_A.csv
	TaxMP_MPAv2_NewWF_BGP_1_A.csv		Bacteria	Unknown Kingdom	Thermotogae	Thermotogae	Thermotogales	Thermotogaceae	Thermotoga	Thermotoga petrophila	Thermotoga petrophila RKU-1	1	1		TaxMP_MPAv2_NewWF_BGP_1_A.csv
	TaxMP_MPAv2_NewWF_BGP_1_A.csv		Bacteria	Unknown Kingdom	Actinobacteria	Actinobacteria	Actinomycetales	Mycobacteriaceae	Mycobacterium	Unknown Species	Unknown Subspecies	2	2		TaxMP_MPAv2_NewWF_BGP_1_A.csv
	TaxMP_MPAv2_NewWF_BGP_1_A.csv		Bacteria	Unknown Kingdom	Proteobacteria	Gammaproteobacteria	Xanthomonadales	Xanthomonadaceae	Xanthomonas	Xanthomonas sp. T22	Unknown Subspecies	1	5		TaxMP_MPAv2_NewWF_BGP_1_A.csv
	TaxMP_MPAv2_NewWF_BGP_1_A.csv		Bacteria	Unknown Kingdom	Proteobacteria	Betaproteobacteria	Burkholderiales	Burkholderiaceae	Cupriavidus	Cupriavidus necator	Ralstonia eutropha H16	5	11		TaxMP_MPAv2_NewWF_BGP_1_A.csv
	TaxMP_MPAv2_NewWF_BGP_1_A.csv		Bacteria	Unknown Kingdom	Actinobacteria	Actinobacteria	Actinomycetales	Mycobacteriaceae	Mycobacterium	Mycobacterium leprae	Unknown Subspecies	1	2		TaxMP_MPAv2_NewWF_BGP_1_A.csv
	TaxMP_MPAv2_NewWF_BGP_1_A.csv		Bacteria	Unknown Kingdom	Proteobacteria	Alphaproteobacteria	Rhizobiales	Brucellaceae	Brucella	Unknown Species	Unknown Subspecies	49	161		TaxMP_MPAv2_NewWF_BGP_1_A.csv
	TaxMP_MPAv2_NewWF_BGP_1_A.csv		Bacteria	Unknown Kingdom	Firmicutes	Bacilli	Lactobacillales	Streptococcaceae	Lactococcus	Lactococcus lactis subsp. cremoris SK11	Lactococcus lactis subsp. cremoris	1	3		TaxMP_MPAv2_NewWF_BGP_1_A.csv
	TaxMP_MPAv2_NewWF_BGP_1_A.csv		Bacteria	Unknown Kingdom	Firmicutes	Clostridia	Clostridiales	Clostridiaceae	Unknown Genus	Unknown Species	Unknown Subspecies	4	7		TaxMP_MPAv2_NewWF_BGP_1_A.csv
	TaxMP_MPAv2_NewWF_BGP_1_A.csv		Bacteria	Unknown Kingdom	Firmicutes	Bacilli	Lactobacillales	Streptococcaceae	Lactococcus	Lactococcus lactis subsp. lactis Il1403	Lactococcus lactis subsp. lactis	5	7		TaxMP_MPAv2_NewWF_BGP_1_A.csv
	TaxMP_MPAv2_NewWF_BGP_1_A.csv		Bacteria	Unknown Kingdom	Firmicutes	Clostridia	Clostridiales	Clostridiaceae	Clostridium	Clostridium tetani	Clostridium tetani E88	4	11		TaxMP_MPAv2_NewWF_BGP_1_A.csv
	TaxMP_MPAv2_NewWF_BGP_1_A.csv		Bacteria	Unknown Kingdom	Firmicutes	Clostridia	Thermoanaerobacterales	Thermoanaerobacterales Family III. Incertae Sedis	Thermoanaerobacterium	Thermoanaerobacterium thermosaccharolyticum	Thermoanaerobacterium thermosaccharolyticum DSM 571	1	1		TaxMP_MPAv2_NewWF_BGP_1_A.csv
	TaxMP_MPAv2_NewWF_BGP_1_A.csv		Archaea	Unknown Kingdom	Euryarchaeota	Methanomicrobia	Methanomicrobiales	Methanocorpusculaceae	Methanocorpusculum	Methanocorpusculum labreanum	Methanocorpusculum labreanum Z	1	4		TaxMP_MPAv2_NewWF_BGP_1_A.csv
	TaxMP_MPAv2_NewWF_BGP_1_A.csv		Archaea	Unknown Kingdom	Euryarchaeota	Methanopyri	Methanopyrales	Methanopyraceae	Methanopyrus	Methanopyrus kandleri	Methanopyrus kandleri AV19	2	6		TaxMP_MPAv2_NewWF_BGP_1_A.csv
	TaxMP_MPAv2_NewWF_BGP_1_A.csv		Bacteria	Unknown Kingdom	Firmicutes	Clostridia	Thermoanaerobacterales	Thermoanaerobacterales Family III. Incertae Sedis	Caldicellulosiruptor	Caldicellulosiruptor bescii	Caldicellulosiruptor bescii DSM 6725	1	1		TaxMP_MPAv2_NewWF_BGP_1_A.csv
	TaxMP_MPAv2_NewWF_BGP_1_A.csv		Bacteria	Unknown Kingdom	Firmicutes	Bacilli	Bacillales	Listeriaceae	Listeria	Listeria innocua	Listeria innocua Clip11262	10	20		TaxMP_MPAv2_NewWF_BGP_1_A.csv
	TaxMP_MPAv2_NewWF_BGP_1_A.csv		Bacteria	Unknown Kingdom	Proteobacteria	Deltaproteobacteria	Myxococcales	Myxococcaceae	Anaeromyxobacter	Anaeromyxobacter sp. K	Unknown Subspecies	1	1		TaxMP_MPAv2_NewWF_BGP_1_A.csv
	TaxMP_MPAv2_NewWF_BGP_1_A.csv		Bacteria	Unknown Kingdom	Proteobacteria	Gammaproteobacteria	Pasteurellales	Pasteurellaceae	Haemophilus	Haemophilus influenzae	Haemophilus influenzae Rd KW20	36	100		TaxMP_MPAv2_NewWF_BGP_1_A.csv
	TaxMP_MPAv2_NewWF_BGP_1_A.csv		Bacteria	Unknown Kingdom	Tenericutes	Mollicutes	Mycoplasmatales	Mycoplasmataceae	Mycoplasma	Mycoplasma pulmonis	Mycoplasma pulmonis UAB CTIP	1	2		TaxMP_MPAv2_NewWF_BGP_1_A.csv
	TaxMP_MPAv2_NewWF_BGP_1_A.csv		Bacteria	Unknown Kingdom	Firmicutes	Clostridia	Clostridiales	Peptococcaceae	Pelotomaculum	Pelotomaculum thermopropionicum	Pelotomaculum thermopropionicum SI	6	6		TaxMP_MPAv2_NewWF_BGP_1_A.csv
	TaxMP_MPAv2_NewWF_BGP_1_A.csv		Bacteria	Unknown Kingdom	Firmicutes	Bacilli	Bacillales	Staphylococcaceae	Staphylococcus	Staphylococcus haemolyticus	Staphylococcus haemolyticus JCSC1435	3	7		TaxMP_MPAv2_NewWF_BGP_1_A.csv
	TaxMP_MPAv2_NewWF_BGP_1_A.csv		Bacteria	Unknown Kingdom	Spirochaetes	Spirochaetia	Spirochaetales	Spirochaetaceae	Borrelia	Borrelia recurrentis	Borrelia recurrentis A1	1	2		TaxMP_MPAv2_NewWF_BGP_1_A.csv
	TaxMP_MPAv2_NewWF_BGP_1_A.csv		Bacteria	Unknown Kingdom	Proteobacteria	Betaproteobacteria	Burkholderiales	Burkholderiaceae	Burkholderia	Unknown Species	Unknown Subspecies	2	2		TaxMP_MPAv2_NewWF_BGP_1_A.csv
	TaxMP_MPAv2_NewWF_BGP_1_A.csv		Bacteria	Unknown Kingdom	Proteobacteria	Alphaproteobacteria	Rhodobacterales	Rhodobacteraceae	Paracoccus	Paracoccus denitrificans	Unknown Subspecies	1	1		TaxMP_MPAv2_NewWF_BGP_1_A.csv
	TaxMP_MPAv2_NewWF_BGP_1_A.csv		Bacteria	Unknown Kingdom	Cyanobacteria	Unknown Class	Nostocales	Nostocaceae	Nostoc	Nostoc sp. PCC 7120	Unknown Subspecies	8	14		TaxMP_MPAv2_NewWF_BGP_1_A.csv
	TaxMP_MPAv2_NewWF_BGP_1_A.csv		Eukaryota	Metazoa	Chordata	Unknown Class	Unknown Order	Unknown Family	Unknown Genus	Unknown Species	Unknown Subspecies	2	2		TaxMP_MPAv2_NewWF_BGP_1_A.csv
	TaxMP_MPAv2_NewWF_BGP_1_A.csv		Bacteria	Unknown Kingdom	Proteobacteria	Gammaproteobacteria	Vibrionales	Vibrionaceae	Vibrio	Vibrio harveyi	Vibrio harveyi ATCC BAA-1116	1	2		TaxMP_MPAv2_NewWF_BGP_1_A.csv
	TaxMP_MPAv2_NewWF_BGP_1_A.csv		Bacteria	Unknown Kingdom	Firmicutes	Clostridia	Clostridiales	Clostridiaceae	Clostridium	Clostridium botulinum B str. Eklund 17B(NRP)	Clostridium botulinum B	2	3		TaxMP_MPAv2_NewWF_BGP_1_A.csv
	TaxMP_MPAv2_NewWF_BGP_1_A.csv		Archaea	Unknown Kingdom	Euryarchaeota	Methanomicrobia	Methanomicrobiales	Methanomicrobiaceae	Methanoculleus	Methanoculleus marisnigri	Methanoculleus marisnigri JR1	3	4		TaxMP_MPAv2_NewWF_BGP_1_A.csv
	TaxMP_MPAv2_NewWF_BGP_1_A.csv		Bacteria	Unknown Kingdom	Deinococcus-Thermus	Deinococci	Deinococcales	Deinococcaceae	Deinococcus	Unknown Species	Unknown Subspecies	1	1		TaxMP_MPAv2_NewWF_BGP_1_A.csv
	TaxMP_MPAv2_NewWF_BGP_1_A.csv		Bacteria	Unknown Kingdom	Deinococcus-Thermus	Deinococci	Thermales	Thermaceae	Thermus	Thermus thermophilus	Unknown Subspecies	1	1		TaxMP_MPAv2_NewWF_BGP_1_A.csv
	TaxMP_MPAv2_NewWF_BGP_1_A.csv		Eukaryota	Metazoa	Chordata	Actinopterygii	Cypriniformes	Cyprinidae	Danio	Danio rerio	Unknown Subspecies	5	6		TaxMP_MPAv2_NewWF_BGP_1_A.csv
	TaxMP_MPAv2_NewWF_BGP_1_A.csv		Bacteria	Unknown Kingdom	Firmicutes	Bacilli	Lactobacillales	Streptococcaceae	Streptococcus	Unknown Species	Unknown Subspecies	1	1		TaxMP_MPAv2_NewWF_BGP_1_A.csv
	TaxMP_MPAv2_NewWF_BGP_1_A.csv		Eukaryota	Viridiplantae	Streptophyta	Coniferopsida	Coniferales	Pinaceae	Pinus	Pinus thunbergii	Unknown Subspecies	1	1		TaxMP_MPAv2_NewWF_BGP_1_A.csv
	TaxMP_MPAv2_NewWF_BGP_1_A.csv		Bacteria	Unknown Kingdom	Cyanobacteria	Unknown Class	Chroococcales	Unknown Family	Synechococcus	Synechococcus elongatus	Synechococcus elongatus PCC 6301	1	1		TaxMP_MPAv2_NewWF_BGP_1_A.csv
	TaxMP_MPAv2_NewWF_BGP_1_A.csv		Bacteria	Unknown Kingdom	Proteobacteria	Alphaproteobacteria	Rhodobacterales	Rhodobacteraceae	Ruegeria	Unknown Species	Unknown Subspecies	1	1		TaxMP_MPAv2_NewWF_BGP_1_A.csv
	TaxMP_MPAv2_NewWF_BGP_1_A.csv		Bacteria	Unknown Kingdom	Firmicutes	Bacilli	Bacillales	Paenibacillaceae	Brevibacillus	Brevibacillus brevis	Brevibacillus brevis NBRC 100599	2	3		TaxMP_MPAv2_NewWF_BGP_1_A.csv
	TaxMP_MPAv2_NewWF_BGP_1_A.csv		Bacteria	Unknown Kingdom	Firmicutes	Bacilli	Lactobacillales	Streptococcaceae	Streptococcus	Streptococcus thermophilus	Unknown Subspecies	1	1		TaxMP_MPAv2_NewWF_BGP_1_A.csv
	TaxMP_MPAv2_NewWF_BGP_1_A.csv		Bacteria	Unknown Kingdom	Proteobacteria	Gammaproteobacteria	Pseudomonadales	Pseudomonadaceae	Pseudomonas	Unknown Species	Unknown Subspecies	2	4		TaxMP_MPAv2_NewWF_BGP_1_A.csv
	TaxMP_MPAv2_NewWF_BGP_1_A.csv		Bacteria	Unknown Kingdom	Firmicutes	Bacilli	Lactobacillales	Streptococcaceae	Streptococcus	Streptococcus pneumoniae	Unknown Subspecies	16	64		TaxMP_MPAv2_NewWF_BGP_1_A.csv
	TaxMP_MPAv2_NewWF_BGP_1_A.csv		Bacteria	Unknown Kingdom	Thermotogae	Thermotogae	Thermotogales	Thermotogaceae	Thermotoga	Thermotoga neapolitana	Unknown Subspecies	7	9		TaxMP_MPAv2_NewWF_BGP_1_A.csv
	TaxMP_MPAv2_NewWF_BGP_1_A.csv		Bacteria	Unknown Kingdom	Firmicutes	Bacilli	Lactobacillales	Streptococcaceae	Streptococcus	Streptococcus pyogenes	Unknown Subspecies	1	3		TaxMP_MPAv2_NewWF_BGP_1_A.csv
	TaxMP_MPAv2_NewWF_BGP_1_A.csv		Bacteria	Unknown Kingdom	Spirochaetes	Spirochaetia	Spirochaetales	Brachyspiraceae	Brachyspira	Brachyspira hyodysenteriae	Brachyspira hyodysenteriae WA1	4	6		TaxMP_MPAv2_NewWF_BGP_1_A.csv
	TaxMP_MPAv2_NewWF_BGP_1_A.csv		Bacteria	Unknown Kingdom	Cyanobacteria	Unknown Class	Chroococcales	Unknown Family	Synechococcus	Synechococcus elongatus	Unknown Subspecies	1	4		TaxMP_MPAv2_NewWF_BGP_1_A.csv
	TaxMP_MPAv2_NewWF_BGP_1_A.csv		Eukaryota	Fungi	Ascomycota	Saccharomycetes	Saccharomycetales	Saccharomycetaceae	Kluyveromyces	Kluyveromyces marxianus	Unknown Subspecies	1	1		TaxMP_MPAv2_NewWF_BGP_1_A.csv
	TaxMP_MPAv2_NewWF_BGP_1_A.csv		Bacteria	Unknown Kingdom	Proteobacteria	Gammaproteobacteria	Pseudomonadales	Pseudomonadaceae	Pseudomonas	Pseudomonas putida	Unknown Subspecies	2	3		TaxMP_MPAv2_NewWF_BGP_1_A.csv
	TaxMP_MPAv2_NewWF_BGP_1_A.csv		Bacteria	Unknown Kingdom	Deinococcus-Thermus	Deinococci	Thermales	Thermaceae	Thermus	Thermus thermophilus	Thermus thermophilus HB8	6	10		TaxMP_MPAv2_NewWF_BGP_1_A.csv
	TaxMP_MPAv2_NewWF_BGP_1_A.csv		Bacteria	Unknown Kingdom	Bacteroidetes	Bacteroidia	Bacteroidales	Bacteroidaceae	Bacteroides	Unknown Species	Unknown Subspecies	5	7		TaxMP_MPAv2_NewWF_BGP_1_A.csv
	TaxMP_MPAv2_NewWF_BGP_1_A.csv		Bacteria	Unknown Kingdom	Proteobacteria	Deltaproteobacteria	Desulfobacterales	Desulfobacteraceae	Desulfococcus	Desulfococcus oleovorans	Desulfococcus oleovorans Hxd3	2	6		TaxMP_MPAv2_NewWF_BGP_1_A.csv
	TaxMP_MPAv2_NewWF_BGP_1_A.csv		Bacteria	Unknown Kingdom	Cyanobacteria	Unknown Class	Chroococcales	Unknown Family	Synechococcus	Synechococcus sp. JA-2-3B'a(2-13)	Unknown Subspecies	1	1		TaxMP_MPAv2_NewWF_BGP_1_A.csv
	TaxMP_MPAv2_NewWF_BGP_1_A.csv		Bacteria	Unknown Kingdom	Bacteroidetes	Bacteroidia	Bacteroidales	Bacteroidaceae	Bacteroides	Bacteroides fragilis	Unknown Subspecies	1	2		TaxMP_MPAv2_NewWF_BGP_1_A.csv
	TaxMP_MPAv2_NewWF_BGP_1_A.csv		Bacteria	Unknown Kingdom	Proteobacteria	Gammaproteobacteria	Vibrionales	Vibrionaceae	Vibrio	Vibrio anguillarum	Unknown Subspecies	1	1		TaxMP_MPAv2_NewWF_BGP_1_A.csv
	TaxMP_MPAv2_NewWF_BGP_1_A.csv		Bacteria	Unknown Kingdom	Actinobacteria	Actinobacteria	Bifidobacteriales	Bifidobacteriaceae	Bifidobacterium	Bifidobacterium longum subsp. longum JCM 1217	Bifidobacterium longum subsp. longum	1	1		TaxMP_MPAv2_NewWF_BGP_1_A.csv
	TaxMP_MPAv2_NewWF_BGP_1_A.csv		Bacteria	Unknown Kingdom	Proteobacteria	Betaproteobacteria	Burkholderiales	Comamonadaceae	Hydrogenophaga	Hydrogenophaga pseudoflava	Unknown Subspecies	1	3		TaxMP_MPAv2_NewWF_BGP_1_A.csv
	TaxMP_MPAv2_NewWF_BGP_1_A.csv		Archaea	Unknown Kingdom	Euryarchaeota	Halobacteria	Halobacteriales	Halobacteriaceae	Halobacterium	Halobacterium salinarum	Halobacterium salinarum R1	1	5		TaxMP_MPAv2_NewWF_BGP_1_A.csv
	TaxMP_MPAv2_NewWF_BGP_1_A.csv		Bacteria	Unknown Kingdom	Proteobacteria	Gammaproteobacteria	Enterobacteriales	Enterobacteriaceae	Salmonella	Salmonella enterica	Salmonella enterica subsp. enterica	8	18		TaxMP_MPAv2_NewWF_BGP_1_A.csv
	TaxMP_MPAv2_NewWF_BGP_1_A.csv		Bacteria	Unknown Kingdom	Bacteroidetes	Bacteroidia	Bacteroidales	Porphyromonadaceae	Porphyromonas	Porphyromonas gingivalis	Unknown Subspecies	4	9		TaxMP_MPAv2_NewWF_BGP_1_A.csv
	TaxMP_MPAv2_NewWF_BGP_1_A.csv		Eukaryota	Viridiplantae	Streptophyta	Unknown Class	Unknown Order	Unknown Family	Unknown Genus	Unknown Species	Unknown Subspecies	1	1		TaxMP_MPAv2_NewWF_BGP_1_A.csv
	TaxMP_MPAv2_NewWF_BGP_1_A.csv		Bacteria	Unknown Kingdom	Proteobacteria	Alphaproteobacteria	Rickettsiales	Rickettsiaceae	Rickettsia	Rickettsia typhi	Rickettsia typhi str. Wilmington	1	1		TaxMP_MPAv2_NewWF_BGP_1_A.csv
	TaxMP_MPAv2_NewWF_BGP_1_A.csv		Bacteria	Unknown Kingdom	Bacteroidetes	Bacteroidia	Bacteroidales	Bacteroidaceae	Bacteroides	Bacteroides ovatus	Bacteroides ovatus ATCC 8483	12	25		TaxMP_MPAv2_NewWF_BGP_1_A.csv
	TaxMP_MPAv2_NewWF_BGP_1_A.csv		Bacteria	Unknown Kingdom	Proteobacteria	Deltaproteobacteria	Desulfovibrionales	Desulfovibrionaceae	Desulfovibrio	Desulfovibrio desulfuricans subsp. desulfuricans str. ATCC 27774	Desulfovibrio desulfuricans subsp. desulfuricans	5	22		TaxMP_MPAv2_NewWF_BGP_1_A.csv
	TaxMP_MPAv2_NewWF_BGP_1_A.csv		Bacteria	Unknown Kingdom	Proteobacteria	Betaproteobacteria	Rhodocyclales	Rhodocyclaceae	Aromatoleum	Aromatoleum aromaticum	Aromatoleum aromaticum EbN1	1	1		TaxMP_MPAv2_NewWF_BGP_1_A.csv
	TaxMP_MPAv2_NewWF_BGP_1_A.csv		Bacteria	Unknown Kingdom	Firmicutes	Clostridia	Clostridiales	Clostridiaceae	Clostridium	Clostridium saccharolyticum	Clostridium saccharolyticum WM1	2	3		TaxMP_MPAv2_NewWF_BGP_1_A.csv
	TaxMP_MPAv2_NewWF_BGP_1_A.csv		Bacteria	Unknown Kingdom	Proteobacteria	Betaproteobacteria	Burkholderiales	Burkholderiaceae	Ralstonia	Ralstonia solanacearum	Ralstonia solanacearum GMI1000	2	2		TaxMP_MPAv2_NewWF_BGP_1_A.csv
	TaxMP_MPAv2_NewWF_BGP_1_A.csv		Bacteria	Unknown Kingdom	Spirochaetes	Spirochaetia	Spirochaetales	Spirochaetaceae	Borrelia	Borrelia turicatae	Borrelia turicatae 91E135	1	4		TaxMP_MPAv2_NewWF_BGP_1_A.csv
	TaxMP_MPAv2_NewWF_BGP_1_A.csv		Bacteria	Unknown Kingdom	Actinobacteria	Actinobacteria	Actinomycetales	Streptomycetaceae	Streptomyces	Streptomyces ambofaciens	Unknown Subspecies	1	3		TaxMP_MPAv2_NewWF_BGP_1_A.csv
	TaxMP_MPAv2_NewWF_BGP_1_A.csv		Bacteria	Unknown Kingdom	Actinobacteria	Actinobacteria	Actinomycetales	Streptomycetaceae	Streptomyces	Streptomyces antibioticus	Unknown Subspecies	1	2		TaxMP_MPAv2_NewWF_BGP_1_A.csv
	TaxMP_MPAv2_NewWF_BGP_1_A.csv		Bacteria	Unknown Kingdom	Fusobacteria	Fusobacteriia	Fusobacteriales	Fusobacteriaceae	Fusobacterium	Fusobacterium nucleatum subsp. nucleatum ATCC 25586	Fusobacterium nucleatum subsp. nucleatum	1	2		TaxMP_MPAv2_NewWF_BGP_1_A.csv
	TaxMP_MPAv2_NewWF_BGP_1_A.csv		Bacteria	Unknown Kingdom	Firmicutes	Bacilli	Bacillales	Bacillaceae	Bacillus	Bacillus pumilus	Bacillus pumilus SAFR-032	1	2		TaxMP_MPAv2_NewWF_BGP_1_A.csv
	TaxMP_MPAv2_NewWF_BGP_1_A.csv		Bacteria	Unknown Kingdom	Proteobacteria	Alphaproteobacteria	Rhizobiales	Unknown Family	Unknown Genus	Unknown Species	Unknown Subspecies	1	3		TaxMP_MPAv2_NewWF_BGP_1_A.csv
	TaxMP_MPAv2_NewWF_BGP_1_A.csv		Bacteria	Unknown Kingdom	Proteobacteria	Alphaproteobacteria	Rhizobiales	Rhizobiaceae	Agrobacterium	Agrobacterium tumefaciens	Unknown Subspecies	7	23		TaxMP_MPAv2_NewWF_BGP_1_A.csv
	TaxMP_MPAv2_NewWF_BGP_1_A.csv		Bacteria	Unknown Kingdom	Firmicutes	Clostridia	Thermoanaerobacterales	Thermoanaerobacteraceae	Thermoanaerobacter	Thermoanaerobacter sp. X514	Unknown Subspecies	1	2		TaxMP_MPAv2_NewWF_BGP_1_A.csv
	TaxMP_MPAv2_NewWF_BGP_1_A.csv		Bacteria	Unknown Kingdom	Firmicutes	Bacilli	Bacillales	Unknown Family	Unknown Genus	Unknown Species	Unknown Subspecies	21	66		TaxMP_MPAv2_NewWF_BGP_1_A.csv
	TaxMP_MPAv2_NewWF_BGP_1_A.csv		Bacteria	Unknown Kingdom	Proteobacteria	Epsilonproteobacteria	Campylobacterales	Helicobacteraceae	Helicobacter	Helicobacter pylori	Helicobacter pylori G27	2	4		TaxMP_MPAv2_NewWF_BGP_1_A.csv
	TaxMP_MPAv2_NewWF_BGP_1_A.csv		Bacteria	Unknown Kingdom	Firmicutes	Bacilli	Bacillales	Bacillaceae	Bacillus	Unknown Species	Unknown Subspecies	13	39		TaxMP_MPAv2_NewWF_BGP_1_A.csv
	TaxMP_MPAv2_NewWF_BGP_1_A.csv		Eukaryota	Metazoa	Chordata	Mammalia	Rodentia	Muridae	Mus	Mus musculus	Unknown Subspecies	1	1		TaxMP_MPAv2_NewWF_BGP_1_A.csv
	TaxMP_MPAv2_NewWF_BGP_1_A.csv		Bacteria	Unknown Kingdom	Firmicutes	Clostridia	Clostridiales	Clostridiaceae	Clostridium	Clostridium novyi	Clostridium novyi NT	2	2		TaxMP_MPAv2_NewWF_BGP_1_A.csv
	TaxMP_MPAv2_NewWF_BGP_1_A.csv		Bacteria	Unknown Kingdom	Firmicutes	Clostridia	Clostridiales	Clostridiaceae	Clostridium	Clostridium thermocellum	Clostridium thermocellum ATCC 27405	17	25		TaxMP_MPAv2_NewWF_BGP_1_A.csv
	TaxMP_MPAv2_NewWF_BGP_1_A.csv		Bacteria	Unknown Kingdom	Firmicutes	Bacilli	Bacillales	Alicyclobacillaceae	Alicyclobacillus	Alicyclobacillus acidocaldarius	Alicyclobacillus acidocaldarius subsp. acidocaldarius	1	1		TaxMP_MPAv2_NewWF_BGP_1_A.csv
	TaxMP_MPAv2_NewWF_BGP_1_A.csv		Archaea	Unknown Kingdom	Euryarchaeota	Methanobacteria	Methanobacteriales	Methanobacteriaceae	Methanothermobacter	Unknown Species	Unknown Subspecies	19	39		TaxMP_MPAv2_NewWF_BGP_1_A.csv
	TaxMP_MPAv2_NewWF_BGP_1_A.csv		Bacteria	Unknown Kingdom	Proteobacteria	Deltaproteobacteria	Desulfovibrionales	Desulfovibrionaceae	Desulfovibrio	Desulfovibrio fructosovorans	Unknown Subspecies	6	12		TaxMP_MPAv2_NewWF_BGP_1_A.csv
	TaxMP_MPAv2_NewWF_BGP_1_A.csv		Bacteria	Unknown Kingdom	Proteobacteria	Deltaproteobacteria	Desulfovibrionales	Desulfovibrionaceae	Desulfovibrio	Desulfovibrio gigas	Unknown Subspecies	22	64		TaxMP_MPAv2_NewWF_BGP_1_A.csv
	TaxMP_MPAv2_NewWF_BGP_1_A.csv		Bacteria	Unknown Kingdom	Firmicutes	Bacilli	Bacillales	Bacillaceae	Bacillus	Bacillus anthracis	Unknown Subspecies	6	18		TaxMP_MPAv2_NewWF_BGP_1_A.csv
	TaxMP_MPAv2_NewWF_BGP_1_A.csv		Eukaryota	Metazoa	Chordata	Actinopterygii	Gadiformes	Gadidae	Gadus	Gadus morhua	Unknown Subspecies	1	1		TaxMP_MPAv2_NewWF_BGP_1_A.csv
	TaxMP_MPAv2_NewWF_BGP_1_A.csv		Bacteria	Unknown Kingdom	Proteobacteria	Deltaproteobacteria	Desulfovibrionales	Desulfovibrionaceae	Desulfovibrio	Desulfovibrio vulgaris	Desulfovibrio vulgaris str. Hildenborough	6	7		TaxMP_MPAv2_NewWF_BGP_1_A.csv
	TaxMP_MPAv2_NewWF_BGP_1_A.csv		Bacteria	Unknown Kingdom	Cyanobacteria	Unknown Class	Chroococcales	Unknown Family	Synechococcus	Synechococcus sp. CC9902	Unknown Subspecies	1	1		TaxMP_MPAv2_NewWF_BGP_1_A.csv
	TaxMP_MPAv2_NewWF_BGP_1_A.csv		Bacteria	Unknown Kingdom	Firmicutes	Bacilli	Bacillales	Bacillaceae	Bacillus	Bacillus cereus	Unknown Subspecies	1	1		TaxMP_MPAv2_NewWF_BGP_1_A.csv
	TaxMP_MPAv2_NewWF_BGP_1_A.csv		Bacteria	Unknown Kingdom	Actinobacteria	Actinobacteria	Actinomycetales	Streptomycetaceae	Streptomyces	Streptomyces globisporus	Unknown Subspecies	1	1		TaxMP_MPAv2_NewWF_BGP_1_A.csv
	TaxMP_MPAv2_NewWF_BGP_1_A.csv		Bacteria	Unknown Kingdom	Firmicutes	Bacilli	Bacillales	Bacillaceae	Bacillus	Bacillus circulans	Unknown Subspecies	5	10		TaxMP_MPAv2_NewWF_BGP_1_A.csv
	TaxMP_MPAv2_NewWF_BGP_1_A.csv		Bacteria	Unknown Kingdom	Firmicutes	Bacilli	Bacillales	Bacillaceae	Bacillus	Bacillus sp. H-257	Unknown Subspecies	1	1		TaxMP_MPAv2_NewWF_BGP_1_A.csv
	TaxMP_MPAv2_NewWF_BGP_1_A.csv		Bacteria	Unknown Kingdom	Firmicutes	Bacilli	Bacillales	Bacillaceae	Bacillus	Bacillus licheniformis	Unknown Subspecies	1	2		TaxMP_MPAv2_NewWF_BGP_1_A.csv
	TaxMP_MPAv2_NewWF_BGP_1_A.csv		Bacteria	Unknown Kingdom	Actinobacteria	Actinobacteria	Actinomycetales	Streptomycetaceae	Streptomyces	Streptomyces lividans	Unknown Subspecies	11	22		TaxMP_MPAv2_NewWF_BGP_1_A.csv
	TaxMP_MPAv2_NewWF_BGP_1_A.csv		Bacteria	Unknown Kingdom	Firmicutes	Bacilli	Bacillales	Paenibacillaceae	Paenibacillus	Paenibacillus polymyxa	Unknown Subspecies	4	13		TaxMP_MPAv2_NewWF_BGP_1_A.csv
	TaxMP_MPAv2_NewWF_BGP_1_A.csv		Bacteria	Unknown Kingdom	Proteobacteria	Alphaproteobacteria	Rhizobiales	Rhizobiaceae	Sinorhizobium	Sinorhizobium meliloti	Unknown Subspecies	4	6		TaxMP_MPAv2_NewWF_BGP_1_A.csv
	TaxMP_MPAv2_NewWF_BGP_1_A.csv		Bacteria	Unknown Kingdom	Spirochaetes	Spirochaetia	Spirochaetales	Spirochaetaceae	Borrelia	Unknown Species	Unknown Subspecies	1	3		TaxMP_MPAv2_NewWF_BGP_1_A.csv
	TaxMP_MPAv2_NewWF_BGP_1_A.csv		Eukaryota	Viridiplantae	Streptophyta	Liliopsida	Poales	Poaceae	Unknown Genus	Unknown Species	Unknown Subspecies	1	4		TaxMP_MPAv2_NewWF_BGP_1_A.csv
	TaxMP_MPAv2_NewWF_BGP_1_A.csv		Bacteria	Unknown Kingdom	Firmicutes	Bacilli	Bacillales	Bacillaceae	Bacillus	Bacillus sp.	Unknown Subspecies	6	10		TaxMP_MPAv2_NewWF_BGP_1_A.csv
	TaxMP_MPAv2_NewWF_BGP_1_A.csv		Bacteria	Unknown Kingdom	Actinobacteria	Actinobacteria	Rubrobacterales	Rubrobacteraceae	Rubrobacter	Rubrobacter xylanophilus	Rubrobacter xylanophilus DSM 9941	1	1		TaxMP_MPAv2_NewWF_BGP_1_A.csv
	TaxMP_MPAv2_NewWF_BGP_1_A.csv		Bacteria	Unknown Kingdom	Bacteroidetes	Bacteroidia	Bacteroidales	Porphyromonadaceae	Parabacteroides	Parabacteroides distasonis	Parabacteroides distasonis ATCC 8503	2	3		TaxMP_MPAv2_NewWF_BGP_1_A.csv
	TaxMP_MPAv2_NewWF_BGP_1_A.csv		Eukaryota	Unknown Kingdom	Unknown Phylum	Unknown Class	Unknown Order	Unknown Family	Unknown Genus	Unknown Species	Unknown Subspecies	4	9		TaxMP_MPAv2_NewWF_BGP_1_A.csv
	TaxMP_MPAv2_NewWF_BGP_1_A.csv		Bacteria	Unknown Kingdom	Firmicutes	Bacilli	Lactobacillales	Streptococcaceae	Streptococcus	Streptococcus pyogenes	Streptococcus pyogenes serotype M1	1	1		TaxMP_MPAv2_NewWF_BGP_1_A.csv
	TaxMP_MPAv2_NewWF_BGP_1_A.csv		Bacteria	Unknown Kingdom	Proteobacteria	Deltaproteobacteria	Desulfovibrionales	Desulfomicrobiaceae	Desulfomicrobium	Desulfomicrobium baculatum	Unknown Subspecies	3	4		TaxMP_MPAv2_NewWF_BGP_1_A.csv
	TaxMP_MPAv2_NewWF_BGP_1_A.csv		Bacteria	Unknown Kingdom	Proteobacteria	Alphaproteobacteria	Rhizobiales	Rhizobiaceae	Rhizobium	Rhizobium leguminosarum	Rhizobium leguminosarum bv. viciae	1	1		TaxMP_MPAv2_NewWF_BGP_1_A.csv
	TaxMP_MPAv2_NewWF_BGP_1_A.csv		Bacteria	Unknown Kingdom	Proteobacteria	Gammaproteobacteria	Enterobacteriales	Enterobacteriaceae	Escherichia	Escherichia coli	Escherichia coli K-12	28	52		TaxMP_MPAv2_NewWF_BGP_1_A.csv
	TaxMP_MPAv2_NewWF_BGP_1_A.csv		Bacteria	Unknown Kingdom	Firmicutes	Clostridia	Clostridiales	Peptococcaceae	Desulfitobacterium	Desulfitobacterium hafniense	Desulfitobacterium hafniense Y51	2	2		TaxMP_MPAv2_NewWF_BGP_1_A.csv
	TaxMP_MPAv2_NewWF_BGP_1_A.csv		Bacteria	Unknown Kingdom	Actinobacteria	Actinobacteria	Actinomycetales	Mycobacteriaceae	Mycobacterium	Mycobacterium tuberculosis	Mycobacterium tuberculosis H37Rv	1	1		TaxMP_MPAv2_NewWF_BGP_1_A.csv
	TaxMP_MPAv2_NewWF_BGP_1_A.csv		Bacteria	Unknown Kingdom	Firmicutes	Bacilli	Bacillales	Bacillaceae	Geobacillus	Geobacillus kaustophilus	Geobacillus kaustophilus HTA426	4	5		TaxMP_MPAv2_NewWF_BGP_1_A.csv
	TaxMP_MPAv2_NewWF_BGP_1_A.csv		Eukaryota	Metazoa	Chordata	Mammalia	Primates	Hominidae	Homo	Homo sapiens	Unknown Subspecies	1	1		TaxMP_MPAv2_NewWF_BGP_1_A.csv
	TaxMP_MPAv2_NewWF_BGP_1_A.csv		Bacteria	Unknown Kingdom	Firmicutes	Bacilli	Bacillales	Bacillaceae	Bacillus	Bacillus sp. KSM-635	Unknown Subspecies	3	7		TaxMP_MPAv2_NewWF_BGP_1_A.csv
	TaxMP_MPAv2_NewWF_BGP_1_A.csv		Bacteria	Unknown Kingdom	Proteobacteria	Gammaproteobacteria	Enterobacteriales	Enterobacteriaceae	Escherichia	Escherichia coli	Escherichia coli O157:H7	1	2		TaxMP_MPAv2_NewWF_BGP_1_A.csv
	TaxMP_MPAv2_NewWF_BGP_1_A.csv		Bacteria	Unknown Kingdom	Bacteroidetes	Bacteroidia	Bacteroidales	Bacteroidaceae	Bacteroides	Bacteroides thetaiotaomicron	Bacteroides thetaiotaomicron VPI-5482	92	185		TaxMP_MPAv2_NewWF_BGP_1_A.csv
	TaxMP_MPAv2_NewWF_BGP_1_A.csv		Bacteria	Unknown Kingdom	Chloroflexi	Chloroflexi	Chloroflexales	Chloroflexaceae	Roseiflexus	Roseiflexus castenholzii	Roseiflexus castenholzii DSM 13941	1	1		TaxMP_MPAv2_NewWF_BGP_1_A.csv
	TaxMP_MPAv2_NewWF_BGP_1_A.csv		Bacteria	Unknown Kingdom	Proteobacteria	Alphaproteobacteria	Rhizobiales	Rhizobiaceae	Sinorhizobium	Sinorhizobium fredii	Sinorhizobium fredii NGR234	2	2		TaxMP_MPAv2_NewWF_BGP_1_A.csv
	TaxMP_MPAv2_NewWF_BGP_1_A.csv		Bacteria	Unknown Kingdom	Firmicutes	Bacilli	Lactobacillales	Enterococcaceae	Enterococcus	Enterococcus faecalis	Enterococcus faecalis V583	1	2		TaxMP_MPAv2_NewWF_BGP_1_A.csv
	TaxMP_MPAv2_NewWF_BGP_1_A.csv		Bacteria	Unknown Kingdom	Firmicutes	Bacilli	Bacillales	Bacillaceae	Anoxybacillus	Anoxybacillus flavithermus	Anoxybacillus flavithermus WK1	1	1		TaxMP_MPAv2_NewWF_BGP_1_A.csv
	TaxMP_MPAv2_NewWF_BGP_1_A.csv		Bacteria	Unknown Kingdom	Firmicutes	Bacilli	Bacillales	Bacillaceae	Lysinibacillus	Lysinibacillus sphaericus	Unknown Subspecies	2	6		TaxMP_MPAv2_NewWF_BGP_1_A.csv
	TaxMP_MPAv2_NewWF_BGP_1_A.csv		Bacteria	Unknown Kingdom	Firmicutes	Bacilli	Bacillales	Bacillaceae	Geobacillus	Geobacillus stearothermophilus	Unknown Subspecies	10	13		TaxMP_MPAv2_NewWF_BGP_1_A.csv
	TaxMP_MPAv2_NewWF_BGP_1_A.csv		Bacteria	Unknown Kingdom	Firmicutes	Bacilli	Bacillales	Bacillaceae	Geobacillus	Geobacillus thermodenitrificans	Geobacillus thermodenitrificans NG80-2	1	2		TaxMP_MPAv2_NewWF_BGP_1_A.csv
	TaxMP_MPAv2_NewWF_BGP_1_A.csv		Eukaryota	Metazoa	Chordata	Mammalia	Rodentia	Caviidae	Cavia	Cavia porcellus	Unknown Subspecies	2	4		TaxMP_MPAv2_NewWF_BGP_1_A.csv
	TaxMP_MPAv2_NewWF_BGP_1_A.csv		Bacteria	Unknown Kingdom	Cyanobacteria	Unknown Class	Chroococcales	Unknown Family	Microcystis	Microcystis aeruginosa	Microcystis aeruginosa NIES-843	1	3		TaxMP_MPAv2_NewWF_BGP_1_A.csv
	TaxMP_MPAv2_NewWF_BGP_1_A.csv		Bacteria	Unknown Kingdom	Firmicutes	Bacilli	Lactobacillales	Streptococcaceae	Streptococcus	Streptococcus pyogenes MGAS10394	Streptococcus pyogenes serotype M6	5	7		TaxMP_MPAv2_NewWF_BGP_1_A.csv
	TaxMP_MPAv2_NewWF_BGP_1_A.csv		Eukaryota	Fungi	Ascomycota	Eurotiomycetes	Onygenales	Arthrodermataceae	Trichophyton	Trichophyton rubrum	Unknown Subspecies	2	4		TaxMP_MPAv2_NewWF_BGP_1_A.csv
	TaxMP_MPAv2_NewWF_BGP_1_A.csv		Bacteria	Unknown Kingdom	Firmicutes	Clostridia	Clostridiales	Unknown Family	Unknown Genus	Unknown Species	Unknown Subspecies	13	26		TaxMP_MPAv2_NewWF_BGP_1_A.csv
	TaxMP_MPAv2_NewWF_BGP_1_A.csv		Bacteria	Unknown Kingdom	Firmicutes	Clostridia	Thermoanaerobacterales	Thermoanaerobacteraceae	Carboxydothermus	Carboxydothermus hydrogenoformans	Carboxydothermus hydrogenoformans Z-2901	8	12		TaxMP_MPAv2_NewWF_BGP_1_A.csv
	TaxMP_MPAv2_NewWF_BGP_1_A.csv		Bacteria	Unknown Kingdom	Proteobacteria	Alphaproteobacteria	Rhizobiales	Brucellaceae	Brucella	Brucella suis	Brucella suis 1330	2	3		TaxMP_MPAv2_NewWF_BGP_1_A.csv
	TaxMP_MPAv2_NewWF_BGP_1_A.csv		Bacteria	Unknown Kingdom	Proteobacteria	Gammaproteobacteria	Pseudomonadales	Moraxellaceae	Psychrobacter	Psychrobacter cryohalolentis	Psychrobacter cryohalolentis K5	1	2		TaxMP_MPAv2_NewWF_BGP_1_A.csv
	TaxMP_MPAv2_NewWF_BGP_1_A.csv		Bacteria	Unknown Kingdom	Firmicutes	Clostridia	Unknown Order	Unknown Family	Unknown Genus	Unknown Species	Unknown Subspecies	30	58		TaxMP_MPAv2_NewWF_BGP_1_A.csv
	TaxMP_MPAv2_NewWF_BGP_1_A.csv		Bacteria	Unknown Kingdom	Firmicutes	Bacilli	Unknown Order	Unknown Family	Unknown Genus	Unknown Species	Unknown Subspecies	5	12		TaxMP_MPAv2_NewWF_BGP_1_A.csv
	TaxMP_MPAv2_NewWF_BGP_1_A.csv		Bacteria	Unknown Kingdom	Firmicutes	Clostridia	Clostridiales	Clostridiaceae	Clostridium	Clostridium phytofermentans	Clostridium phytofermentans ISDg	3	4		TaxMP_MPAv2_NewWF_BGP_1_A.csv
	TaxMP_MPAv2_NewWF_BGP_1_A.csv		Bacteria	Unknown Kingdom	Firmicutes	Bacilli	Bacillales	Bacillaceae	Oceanobacillus	Oceanobacillus iheyensis	Oceanobacillus iheyensis HTE831	1	1		TaxMP_MPAv2_NewWF_BGP_1_A.csv
	TaxMP_MPAv2_NewWF_BGP_1_A.csv		Bacteria	Unknown Kingdom	Actinobacteria	Actinobacteria	Actinomycetales	Mycobacteriaceae	Mycobacterium	Mycobacterium smegmatis	Mycobacterium smegmatis str. MC2 155	2	3		TaxMP_MPAv2_NewWF_BGP_1_A.csv
	TaxMP_MPAv2_NewWF_BGP_1_A.csv		Bacteria	Unknown Kingdom	Bacteroidetes	Bacteroidia	Bacteroidales	Porphyromonadaceae	Porphyromonas	Porphyromonas gingivalis	Porphyromonas gingivalis W83	31	101		TaxMP_MPAv2_NewWF_BGP_1_A.csv
	TaxMP_MPAv2_NewWF_BGP_1_A.csv		Archaea	Unknown Kingdom	Euryarchaeota	Methanomicrobia	Methanosarcinales	Methanosarcinaceae	Methanosarcina	Methanosarcina mazei	Methanosarcina mazei Go1	13	20		TaxMP_MPAv2_NewWF_BGP_1_A.csv
	TaxMP_MPAv2_NewWF_BGP_1_A.csv		Bacteria	Unknown Kingdom	Proteobacteria	Alphaproteobacteria	Rhodobacterales	Rhodobacteraceae	Ruegeria	Ruegeria pomeroyi	Ruegeria pomeroyi DSS-3	2	5		TaxMP_MPAv2_NewWF_BGP_1_A.csv
	TaxMP_MPAv2_NewWF_BGP_1_A.csv		Bacteria	Unknown Kingdom	Proteobacteria	Betaproteobacteria	Neisseriales	Neisseriaceae	Neisseria	Neisseria meningitidis FAM18	Neisseria meningitidis serogroup C	1	1		TaxMP_MPAv2_NewWF_BGP_1_A.csv
	TaxMP_MPAv2_NewWF_BGP_1_A.csv		Bacteria	Unknown Kingdom	Firmicutes	Clostridia	Thermoanaerobacterales	Thermoanaerobacteraceae	Unknown Genus	Unknown Species	Unknown Subspecies	1	2		TaxMP_MPAv2_NewWF_BGP_1_A.csv
	TaxMP_MPAv2_NewWF_BGP_1_A.csv		Bacteria	Unknown Kingdom	Firmicutes	Bacilli	Bacillales	Bacillaceae	Unknown Genus	Unknown Species	Unknown Subspecies	2	2		TaxMP_MPAv2_NewWF_BGP_1_A.csv
	TaxMP_MPAv2_NewWF_BGP_1_A.csv		Bacteria	Unknown Kingdom	Proteobacteria	Gammaproteobacteria	Legionellales	Legionellaceae	Tatlockia	Tatlockia micdadei	Unknown Subspecies	1	1		TaxMP_MPAv2_NewWF_BGP_1_A.csv
	TaxMP_MPAv2_NewWF_BGP_1_A.csv		Archaea	Unknown Kingdom	Euryarchaeota	Thermococci	Thermococcales	Thermococcaceae	Pyrococcus	Pyrococcus horikoshii	Pyrococcus horikoshii OT3	10	38		TaxMP_MPAv2_NewWF_BGP_1_A.csv
	TaxMP_MPAv2_NewWF_BGP_1_A.csv		Archaea	Unknown Kingdom	Euryarchaeota	Thermococci	Thermococcales	Thermococcaceae	Pyrococcus	Pyrococcus abyssi	Pyrococcus abyssi GE5	2	5		TaxMP_MPAv2_NewWF_BGP_1_A.csv
	TaxMP_MPAv2_NewWF_BGP_1_A.csv		Bacteria	Unknown Kingdom	Firmicutes	Clostridia	Clostridiales	Clostridiaceae	Clostridium	Unknown Species	Unknown Subspecies	14	24		TaxMP_MPAv2_NewWF_BGP_1_A.csv
	TaxMP_MPAv2_NewWF_BGP_1_A.csv		Bacteria	Unknown Kingdom	Firmicutes	Bacilli	Lactobacillales	Lactobacillaceae	Lactobacillus	Lactobacillus sakei subsp. sakei 23K	Lactobacillus sakei subsp. sakei	1	1		TaxMP_MPAv2_NewWF_BGP_1_A.csv
	TaxMP_MPAv2_NewWF_BGP_1_A.csv		Bacteria	Unknown Kingdom	Bacteroidetes	Unknown Class	Unknown Order	Unknown Family	Unknown Genus	Unknown Species	Unknown Subspecies	2	2		TaxMP_MPAv2_NewWF_BGP_1_A.csv
	TaxMP_MPAv2_NewWF_BGP_1_A.csv		Bacteria	Unknown Kingdom	Firmicutes	Clostridia	Clostridiales	Clostridiaceae	Clostridium	Clostridium botulinum	Unknown Subspecies	6	6		TaxMP_MPAv2_NewWF_BGP_1_A.csv
	TaxMP_MPAv2_NewWF_BGP_1_A.csv		Bacteria	Unknown Kingdom	Bacteroidetes	Bacteroidia	Bacteroidales	Bacteroidaceae	Bacteroides	Bacteroides ovatus	Unknown Subspecies	3	7		TaxMP_MPAv2_NewWF_BGP_1_A.csv
	TaxMP_MPAv2_NewWF_BGP_1_A.csv		Bacteria	Unknown Kingdom	Firmicutes	Clostridia	Clostridiales	Clostridiaceae	Clostridium	Clostridium butyricum	Unknown Subspecies	1	1		TaxMP_MPAv2_NewWF_BGP_1_A.csv
	TaxMP_MPAv2_NewWF_BGP_1_A.csv		Bacteria	Unknown Kingdom	Proteobacteria	Gammaproteobacteria	Enterobacteriales	Enterobacteriaceae	Salmonella	Salmonella enterica subsp. enterica serovar Typhimurium str. LT2	Salmonella enterica subsp. enterica	2	4		TaxMP_MPAv2_NewWF_BGP_1_A.csv
	TaxMP_MPAv2_NewWF_BGP_1_A.csv		Bacteria	Unknown Kingdom	Cyanobacteria	Unknown Class	Chroococcales	Unknown Family	Synechococcus	Synechococcus sp. CC9311	Unknown Subspecies	1	5		TaxMP_MPAv2_NewWF_BGP_1_A.csv
	TaxMP_MPAv2_NewWF_BGP_1_A.csv		Bacteria	Unknown Kingdom	Firmicutes	Clostridia	Clostridiales	Peptostreptococcaceae	Unknown Genus	[Clostridium] difficile	Unknown Subspecies	7	10		TaxMP_MPAv2_NewWF_BGP_1_A.csv
	TaxMP_MPAv2_NewWF_BGP_1_A.csv		Bacteria	Unknown Kingdom	Proteobacteria	Alphaproteobacteria	Rhizobiales	Brucellaceae	Brucella	Brucella abortus	Brucella melitensis biovar Abortus 2308	5	26		TaxMP_MPAv2_NewWF_BGP_1_A.csv
	TaxMP_MPAv2_NewWF_BGP_1_A.csv		Bacteria	Unknown Kingdom	Chlamydiae	Chlamydiia	Chlamydiales	Chlamydiaceae	Chlamydia	Chlamydia muridarum	Chlamydia muridarum Nigg	1	1		TaxMP_MPAv2_NewWF_BGP_1_A.csv
	TaxMP_MPAv2_NewWF_BGP_1_A.csv		Bacteria	Unknown Kingdom	Firmicutes	Clostridia	Clostridiales	Clostridiaceae	Clostridium	Clostridium pasteurianum	Unknown Subspecies	5	6		TaxMP_MPAv2_NewWF_BGP_1_A.csv
	TaxMP_MPAv2_NewWF_BGP_1_A.csv		Bacteria	Unknown Kingdom	Firmicutes	Bacilli	Bacillales	Paenibacillaceae	Paenibacillus	Paenibacillus sp. JDR-2	Unknown Subspecies	2	3		TaxMP_MPAv2_NewWF_BGP_1_A.csv
	TaxMP_MPAv2_NewWF_BGP_1_A.csv		Bacteria	Unknown Kingdom	Firmicutes	Clostridia	Clostridiales	Clostridiaceae	Clostridium	Clostridium perfringens	Unknown Subspecies	3	6		TaxMP_MPAv2_NewWF_BGP_1_A.csv
	TaxMP_MPAv2_NewWF_BGP_1_A.csv		Bacteria	Unknown Kingdom	Firmicutes	Clostridia	Thermoanaerobacterales	Thermoanaerobacterales Family III. Incertae Sedis	Caldicellulosiruptor	Unknown Species	Unknown Subspecies	1	1		TaxMP_MPAv2_NewWF_BGP_1_A.csv
	TaxMP_MPAv2_NewWF_BGP_1_A.csv		Archaea	Unknown Kingdom	Euryarchaeota	Methanomicrobia	Methanosarcinales	Methanosarcinaceae	Methanosarcina	Methanosarcina barkeri	Methanosarcina barkeri str. Fusaro	62	260		TaxMP_MPAv2_NewWF_BGP_1_A.csv
	TaxMP_MPAv2_NewWF_BGP_1_A.csv		Eukaryota	Viridiplantae	Streptophyta	Liliopsida	Poales	Poaceae	Zea	Zea mays	Unknown Subspecies	6	54		TaxMP_MPAv2_NewWF_BGP_1_A.csv
	TaxMP_MPAv2_NewWF_BGP_1_A.csv		Eukaryota	Fungi	Basidiomycota	Agaricomycetes	Unknown Order	Unknown Family	Unknown Genus	Unknown Species	Unknown Subspecies	1	2		TaxMP_MPAv2_NewWF_BGP_1_A.csv
	TaxMP_MPAv2_NewWF_BGP_1_A.csv		Viruses	Unknown Kingdom	Unknown Phylum	Unknown Class	Caudovirales	Siphoviridae	Lambdalikevirus	Bacillus phage SPP1	Unknown Subspecies	6	9		TaxMP_MPAv2_NewWF_BGP_1_A.csv
	TaxMP_MPAv2_NewWF_BGP_1_A.csv		Archaea	Unknown Kingdom	Euryarchaeota	Halobacteria	Halobacteriales	Halobacteriaceae	Haloquadratum	Haloquadratum walsbyi	Haloquadratum walsbyi DSM 16790	1	2		TaxMP_MPAv2_NewWF_BGP_1_A.csv
	TaxMP_MPAv2_NewWF_BGP_1_A.csv		Bacteria	Unknown Kingdom	Firmicutes	Bacilli	Bacillales	Bacillaceae	Bacillus	Bacillus licheniformis	Bacillus licheniformis DSM 13 = ATCC 14580	3	5		TaxMP_MPAv2_NewWF_BGP_1_A.csv
	TaxMP_MPAv2_NewWF_BGP_1_A.csv		Viruses	Unknown Kingdom	Unknown Phylum	Unknown Class	Caudovirales	Siphoviridae	T5likevirus	Enterobacteria phage T5	Unknown Subspecies	1	1		TaxMP_MPAv2_NewWF_BGP_1_A.csv
	TaxMP_MPAv2_NewWF_BGP_1_A.csv		Bacteria	Unknown Kingdom	Actinobacteria	Actinobacteria	Actinomycetales	Propionibacteriaceae	Propionibacterium	Propionibacterium acnes	Propionibacterium acnes KPA171202	1	1		TaxMP_MPAv2_NewWF_BGP_1_A.csv
	TaxMP_MPAv2_NewWF_BGP_1_A.csv		Bacteria	Unknown Kingdom	Firmicutes	Clostridia	Clostridiales	Clostridiaceae	Clostridium	Clostridium symbiosum	Unknown Subspecies	4	6		TaxMP_MPAv2_NewWF_BGP_1_A.csv
	TaxMP_MPAv2_NewWF_BGP_1_A.csv		Bacteria	Unknown Kingdom	Bacteroidetes	Bacteroidia	Bacteroidales	Bacteroidaceae	Bacteroides	Bacteroides fragilis	Bacteroides fragilis YCH46	5	8		TaxMP_MPAv2_NewWF_BGP_1_A.csv
	TaxMP_MPAv2_NewWF_BGP_1_A.csv		Eukaryota	Unknown Kingdom	Apicomplexa	Aconoidasida	Haemosporida	Unknown Family	Plasmodium	Plasmodium falciparum	Plasmodium falciparum 3D7	1	1		TaxMP_MPAv2_NewWF_BGP_1_A.csv
	TaxMP_MPAv2_NewWF_BGP_1_A.csv		Bacteria	Unknown Kingdom	Firmicutes	Clostridia	Clostridiales	Clostridiaceae	Clostridium	Clostridium thermocellum	Unknown Subspecies	4	6		TaxMP_MPAv2_NewWF_BGP_1_A.csv
	TaxMP_MPAv2_NewWF_BGP_1_A.csv		Bacteria	Unknown Kingdom	Firmicutes	Clostridia	Clostridiales	Peptococcaceae	Desulfotomaculum	Desulfotomaculum reducens	Desulfotomaculum reducens MI-1	2	3		TaxMP_MPAv2_NewWF_BGP_1_A.csv
	TaxMP_MPAv2_NewWF_BGP_1_A.csv		Unknown Superkingdom	Unknown Kingdom	Unknown Phylum	Unknown Class	Unknown Order	Unknown Family	Unknown Genus	Unknown Species	Unknown Subspecies	476	1332		TaxMP_MPAv2_NewWF_BGP_1_A.csv
	TaxMP_MPAv2_NewWF_BGP_1_A.csv		Eukaryota	Viridiplantae	Streptophyta	Unknown Class	Malpighiales	Salicaceae	Populus	Populus x jackii	Unknown Subspecies	1	1		TaxMP_MPAv2_NewWF_BGP_1_A.csv
	TaxMP_MPAv2_NewWF_BGP_1_A.csv		Bacteria	Unknown Kingdom	Firmicutes	Bacilli	Lactobacillales	Enterococcaceae	Enterococcus	Enterococcus hirae	Enterococcus hirae ATCC 9790	2	2		TaxMP_MPAv2_NewWF_BGP_1_A.csv
	TaxMP_MPAv2_NewWF_BGP_1_A.csv		Bacteria	Unknown Kingdom	Firmicutes	Clostridia	Clostridiales	Peptostreptococcaceae	Unknown Genus	[Clostridium] sticklandii	Clostridium sticklandii DSM 519	7	13		TaxMP_MPAv2_NewWF_BGP_1_A.csv
	TaxMP_MPAv2_NewWF_BGP_1_A.csv		Bacteria	Unknown Kingdom	Firmicutes	Clostridia	Clostridiales	Clostridiaceae	Clostridium	Clostridium tyrobutyricum	Unknown Subspecies	1	6		TaxMP_MPAv2_NewWF_BGP_1_A.csv
	TaxMP_MPAv2_NewWF_BGP_1_A.csv		Bacteria	Unknown Kingdom	Firmicutes	Clostridia	Clostridiales	Clostridiaceae	Clostridium	Clostridium beijerinckii	Unknown Subspecies	4	9		TaxMP_MPAv2_NewWF_BGP_1_A.csv
	TaxMP_MPAv2_NewWF_BGP_1_A.csv		Bacteria	Unknown Kingdom	Firmicutes	Clostridia	Thermoanaerobacterales	Thermoanaerobacteraceae	Moorella	Moorella thermoacetica	Unknown Subspecies	5	11		TaxMP_MPAv2_NewWF_BGP_1_A.csv
	TaxMP_MPAv2_NewWF_BGP_1_A.csv		Archaea	Unknown Kingdom	Euryarchaeota	Methanomicrobia	Unknown Order	Unknown Family	Unknown Genus	Unknown Species	Unknown Subspecies	8	16		TaxMP_MPAv2_NewWF_BGP_1_A.csv
	TaxMP_MPAv2_NewWF_BGP_1_A.csv		Bacteria	Unknown Kingdom	Cyanobacteria	Unknown Class	Nostocales	Nostocaceae	Trichormus	Trichormus variabilis	Unknown Subspecies	1	1		TaxMP_MPAv2_NewWF_BGP_1_A.csv
	TaxMP_MPAv2_NewWF_BGP_1_A.csv		Bacteria	Unknown Kingdom	Firmicutes	Clostridia	Clostridiales	Eubacteriaceae	Eubacterium	Eubacterium barkeri	Unknown Subspecies	6	7		TaxMP_MPAv2_NewWF_BGP_1_A.csv
	TaxMP_MPAv2_NewWF_BGP_1_A.csv		Eukaryota	Fungi	Ascomycota	Saccharomycetes	Saccharomycetales	Unknown Family	Candida	Candida albicans	Candida albicans SC5314	1	1		TaxMP_MPAv2_NewWF_BGP_1_A.csv
	TaxMP_MPAv2_NewWF_BGP_1_A.csv		Bacteria	Unknown Kingdom	Firmicutes	Clostridia	Clostridiales	Ruminococcaceae	Ruminococcus	Ruminococcus albus	Ruminococcus albus 7	1	1		TaxMP_MPAv2_NewWF_BGP_1_A.csv
	TaxMP_MPAv2_NewWF_BGP_1_A.csv		Bacteria	Unknown Kingdom	Firmicutes	Clostridia	Clostridiales	Clostridiaceae	Clostridium	Clostridium kluyveri	Unknown Subspecies	1	1		TaxMP_MPAv2_NewWF_BGP_1_A.csv
	TaxMP_MPAv2_NewWF_BGP_1_A.csv		Bacteria	Unknown Kingdom	Firmicutes	Bacilli	Lactobacillales	Lactobacillaceae	Lactobacillus	Lactobacillus plantarum	Lactobacillus plantarum WCFS1	2	3		TaxMP_MPAv2_NewWF_BGP_1_A.csv
	TaxMP_MPAv2_NewWF_BGP_1_B.csv		Uncategorized	Unknown Kingdom	Unknown Phylum	Unknown Class	Unknown Order	Unknown Family	Unknown Genus	Unknown Species	Unknown Subspecies	672	1742		TaxMP_MPAv2_NewWF_BGP_1_B.csv
	TaxMP_MPAv2_NewWF_BGP_1_B.csv		Unknown Superkingdom	Unknown Kingdom	Unknown Phylum	Unknown Class	Unknown Order	Unknown Family	Unknown Genus	Unknown Species	Unknown Subspecies	28	109		TaxMP_MPAv2_NewWF_BGP_1_B.csv
	TaxMP_MPAv2_NewWF_BGP_1_B.csv		Bacteria	Unknown Kingdom	Unknown Phylum	Unknown Class	Unknown Order	Unknown Family	Unknown Genus	Unknown Species	Unknown Subspecies	637	1988		TaxMP_MPAv2_NewWF_BGP_1_B.csv
	TaxMP_MPAv2_NewWF_BGP_1_B.csv		Bacteria	Unknown Kingdom	Proteobacteria	Betaproteobacteria	Burkholderiales	Burkholderiaceae	Burkholderia	Burkholderia cenocepacia	Burkholderia cenocepacia AU 1054	1	1		TaxMP_MPAv2_NewWF_BGP_1_B.csv
	TaxMP_MPAv2_NewWF_BGP_1_B.csv		Viruses	Unknown Kingdom	Unknown Phylum	Unknown Class	Unknown Order	Poxviridae	Orthopoxvirus	Vaccinia virus	Unknown Subspecies	1	1		TaxMP_MPAv2_NewWF_BGP_1_B.csv
	TaxMP_MPAv2_NewWF_BGP_1_B.csv		Archaea	Unknown Kingdom	Euryarchaeota	Methanomicrobia	Methanosarcinales	Methanosarcinaceae	Methanosarcina	Methanosarcina acetivorans	Methanosarcina acetivorans C2A	5	5		TaxMP_MPAv2_NewWF_BGP_1_B.csv
	TaxMP_MPAv2_NewWF_BGP_1_B.csv		Eukaryota	Viridiplantae	Streptophyta	Liliopsida	Poales	Poaceae	Oryza	Oryza sativa	Oryza sativa Japonica Group	3	12		TaxMP_MPAv2_NewWF_BGP_1_B.csv
	TaxMP_MPAv2_NewWF_BGP_1_B.csv		Bacteria	Unknown Kingdom	Firmicutes	Clostridia	Clostridiales	Clostridiaceae	Clostridium	Clostridium tetanomorphum	Unknown Subspecies	2	3		TaxMP_MPAv2_NewWF_BGP_1_B.csv
	TaxMP_MPAv2_NewWF_BGP_1_B.csv		Bacteria	Unknown Kingdom	Firmicutes	Clostridia	Thermoanaerobacterales	Thermoanaerobacteraceae	Moorella	Moorella thermoacetica	Moorella thermoacetica ATCC 39073	5	5		TaxMP_MPAv2_NewWF_BGP_1_B.csv
	TaxMP_MPAv2_NewWF_BGP_1_B.csv		Bacteria	Unknown Kingdom	Firmicutes	Clostridia	Clostridiales	Clostridiaceae	Clostridium	Clostridium perfringens	Clostridium perfringens str. 13	6	9		TaxMP_MPAv2_NewWF_BGP_1_B.csv
	TaxMP_MPAv2_NewWF_BGP_1_B.csv		Bacteria	Unknown Kingdom	Proteobacteria	Deltaproteobacteria	Desulfuromonadales	Geobacteraceae	Geobacter	Geobacter sulfurreducens	Geobacter sulfurreducens PCA	1	1		TaxMP_MPAv2_NewWF_BGP_1_B.csv
	TaxMP_MPAv2_NewWF_BGP_1_B.csv		Bacteria	Unknown Kingdom	Deinococcus-Thermus	Deinococci	Deinococcales	Deinococcaceae	Deinococcus	Deinococcus radiodurans	Deinococcus radiodurans R1	11	28		TaxMP_MPAv2_NewWF_BGP_1_B.csv
	TaxMP_MPAv2_NewWF_BGP_1_B.csv		Archaea	Unknown Kingdom	Euryarchaeota	Methanobacteria	Methanobacteriales	Methanobacteriaceae	Methanothermobacter	Methanothermobacter thermautotrophicus	Methanothermobacter thermautotrophicus str. Delta H	20	40		TaxMP_MPAv2_NewWF_BGP_1_B.csv
	TaxMP_MPAv2_NewWF_BGP_1_B.csv		Archaea	Unknown Kingdom	Crenarchaeota	Thermoprotei	Sulfolobales	Sulfolobaceae	Sulfolobus	Sulfolobus acidocaldarius	Sulfolobus acidocaldarius DSM 639	2	3		TaxMP_MPAv2_NewWF_BGP_1_B.csv
	TaxMP_MPAv2_NewWF_BGP_1_B.csv		Bacteria	Unknown Kingdom	Bacteroidetes	Bacteroidia	Bacteroidales	Prevotellaceae	Prevotella	Prevotella ruminicola	Prevotella ruminicola 23	3	3		TaxMP_MPAv2_NewWF_BGP_1_B.csv
	TaxMP_MPAv2_NewWF_BGP_1_B.csv		Bacteria	Unknown Kingdom	Proteobacteria	Gammaproteobacteria	Enterobacteriales	Enterobacteriaceae	Unknown Genus	Unknown Species	Unknown Subspecies	42	98		TaxMP_MPAv2_NewWF_BGP_1_B.csv
	TaxMP_MPAv2_NewWF_BGP_1_B.csv		Bacteria	Unknown Kingdom	Bacteroidetes	Bacteroidia	Bacteroidales	Unknown Family	Unknown Genus	Unknown Species	Unknown Subspecies	2	5		TaxMP_MPAv2_NewWF_BGP_1_B.csv
	TaxMP_MPAv2_NewWF_BGP_1_B.csv		Bacteria	Unknown Kingdom	Proteobacteria	Alphaproteobacteria	Rhizobiales	Bradyrhizobiaceae	Rhodopseudomonas	Rhodopseudomonas palustris	Rhodopseudomonas palustris CGA009	1	2		TaxMP_MPAv2_NewWF_BGP_1_B.csv
	TaxMP_MPAv2_NewWF_BGP_1_B.csv		Bacteria	Unknown Kingdom	Firmicutes	Clostridia	Clostridiales	Clostridiaceae	Clostridium	Clostridium botulinum Ba4 str. 657	Clostridium botulinum B	3	10		TaxMP_MPAv2_NewWF_BGP_1_B.csv
	TaxMP_MPAv2_NewWF_BGP_1_B.csv		Bacteria	Unknown Kingdom	Proteobacteria	Deltaproteobacteria	Myxococcales	Myxococcaceae	Myxococcus	Myxococcus xanthus	Unknown Subspecies	3	3		TaxMP_MPAv2_NewWF_BGP_1_B.csv
	TaxMP_MPAv2_NewWF_BGP_1_B.csv		Bacteria	Unknown Kingdom	Firmicutes	Clostridia	Thermoanaerobacterales	Thermodesulfobiaceae	Coprothermobacter	Coprothermobacter proteolyticus	Coprothermobacter proteolyticus DSM 5265	1	1		TaxMP_MPAv2_NewWF_BGP_1_B.csv
	TaxMP_MPAv2_NewWF_BGP_1_B.csv		Archaea	Unknown Kingdom	Euryarchaeota	Methanococci	Methanococcales	Methanocaldococcaceae	Methanocaldococcus	Methanocaldococcus jannaschii	Methanocaldococcus jannaschii DSM 2661	27	49		TaxMP_MPAv2_NewWF_BGP_1_B.csv
	TaxMP_MPAv2_NewWF_BGP_1_B.csv		Bacteria	Unknown Kingdom	Firmicutes	Clostridia	Clostridiales	Eubacteriaceae	Eubacterium	Eubacterium eligens	Eubacterium eligens ATCC 27750	1	1		TaxMP_MPAv2_NewWF_BGP_1_B.csv
	TaxMP_MPAv2_NewWF_BGP_1_B.csv		Bacteria	Unknown Kingdom	Proteobacteria	Alphaproteobacteria	Rhodobacterales	Rhodobacteraceae	Rhodobacter	Rhodobacter capsulatus	Unknown Subspecies	2	2		TaxMP_MPAv2_NewWF_BGP_1_B.csv
	TaxMP_MPAv2_NewWF_BGP_1_B.csv		Archaea	Unknown Kingdom	Euryarchaeota	Halobacteria	Halobacteriales	Halobacteriaceae	Haloferax	Haloferax volcanii	Haloferax volcanii DS2	6	11		TaxMP_MPAv2_NewWF_BGP_1_B.csv
	TaxMP_MPAv2_NewWF_BGP_1_B.csv		Bacteria	Unknown Kingdom	Firmicutes	Bacilli	Lactobacillales	Lactobacillaceae	Lactobacillus	Lactobacillus casei	Unknown Subspecies	2	3		TaxMP_MPAv2_NewWF_BGP_1_B.csv
	TaxMP_MPAv2_NewWF_BGP_1_B.csv		Bacteria	Unknown Kingdom	Thermotogae	Thermotogae	Thermotogales	Thermotogaceae	Thermotoga	Thermotoga neapolitana	Thermotoga neapolitana DSM 4359	1	1		TaxMP_MPAv2_NewWF_BGP_1_B.csv
	TaxMP_MPAv2_NewWF_BGP_1_B.csv		Bacteria	Unknown Kingdom	Proteobacteria	Gammaproteobacteria	Enterobacteriales	Enterobacteriaceae	Escherichia	Escherichia coli	Unknown Subspecies	19	45		TaxMP_MPAv2_NewWF_BGP_1_B.csv
	TaxMP_MPAv2_NewWF_BGP_1_B.csv		Bacteria	Unknown Kingdom	Proteobacteria	Betaproteobacteria	Burkholderiales	Comamonadaceae	Verminephrobacter	Verminephrobacter eiseniae	Verminephrobacter eiseniae EF01-2	3	4		TaxMP_MPAv2_NewWF_BGP_1_B.csv
	TaxMP_MPAv2_NewWF_BGP_1_B.csv		Eukaryota	Fungi	Ascomycota	Eurotiomycetes	Eurotiales	Trichocomaceae	Aspergillus	Aspergillus oryzae	Aspergillus oryzae RIB40	2	2		TaxMP_MPAv2_NewWF_BGP_1_B.csv
	TaxMP_MPAv2_NewWF_BGP_1_B.csv		Bacteria	Unknown Kingdom	Proteobacteria	Alphaproteobacteria	Unknown Order	Unknown Family	Unknown Genus	Unknown Species	Unknown Subspecies	2	4		TaxMP_MPAv2_NewWF_BGP_1_B.csv
	TaxMP_MPAv2_NewWF_BGP_1_B.csv		Bacteria	Unknown Kingdom	Proteobacteria	Alphaproteobacteria	Rickettsiales	Rickettsiaceae	Rickettsia	Rickettsia conorii	Rickettsia conorii str. Malish 7	1	1		TaxMP_MPAv2_NewWF_BGP_1_B.csv
	TaxMP_MPAv2_NewWF_BGP_1_B.csv		Bacteria	Unknown Kingdom	Firmicutes	Bacilli	Bacillales	Bacillaceae	Bacillus	Bacillus subtilis subsp. subtilis str. 168	Bacillus subtilis subsp. subtilis	169	442		TaxMP_MPAv2_NewWF_BGP_1_B.csv
	TaxMP_MPAv2_NewWF_BGP_1_B.csv		Archaea	Unknown Kingdom	Euryarchaeota	Methanobacteria	Methanobacteriales	Methanobacteriaceae	Methanothermobacter	Methanothermobacter marburgensis	Methanothermobacter marburgensis str. Marburg	5	9		TaxMP_MPAv2_NewWF_BGP_1_B.csv
	TaxMP_MPAv2_NewWF_BGP_1_B.csv		Eukaryota	Metazoa	Arthropoda	Insecta	Diptera	Drosophilidae	Drosophila	Drosophila melanogaster	Unknown Subspecies	6	11		TaxMP_MPAv2_NewWF_BGP_1_B.csv
	TaxMP_MPAv2_NewWF_BGP_1_B.csv		Eukaryota	Fungi	Ascomycota	Saccharomycetes	Saccharomycetales	Debaryomycetaceae	Scheffersomyces	Scheffersomyces stipitis	Scheffersomyces stipitis CBS 6054	1	1		TaxMP_MPAv2_NewWF_BGP_1_B.csv
	TaxMP_MPAv2_NewWF_BGP_1_B.csv		Eukaryota	Fungi	Basidiomycota	Ustilaginomycetes	Ustilaginales	Ustilaginaceae	Ustilago	Ustilago maydis	Ustilago maydis 521	1	1		TaxMP_MPAv2_NewWF_BGP_1_B.csv
	TaxMP_MPAv2_NewWF_BGP_1_B.csv		Bacteria	Unknown Kingdom	Proteobacteria	Deltaproteobacteria	Unknown Order	Unknown Family	Unknown Genus	Unknown Species	Unknown Subspecies	1	2		TaxMP_MPAv2_NewWF_BGP_1_B.csv
	TaxMP_MPAv2_NewWF_BGP_1_B.csv		Bacteria	Unknown Kingdom	Proteobacteria	Alphaproteobacteria	Rhodospirillales	Rhodospirillaceae	Rhodospirillum	Rhodospirillum rubrum	Unknown Subspecies	3	3		TaxMP_MPAv2_NewWF_BGP_1_B.csv
	TaxMP_MPAv2_NewWF_BGP_1_B.csv		Viruses	Unknown Kingdom	Unknown Phylum	Unknown Class	Unknown Order	Mimiviridae	Mimivirus	Acanthamoeba polyphaga mimivirus	Unknown Subspecies	2	7		TaxMP_MPAv2_NewWF_BGP_1_B.csv
	TaxMP_MPAv2_NewWF_BGP_1_B.csv		Bacteria	Unknown Kingdom	Proteobacteria	Gammaproteobacteria	Xanthomonadales	Xanthomonadaceae	Lysobacter	Lysobacter enzymogenes	Unknown Subspecies	1	1		TaxMP_MPAv2_NewWF_BGP_1_B.csv
	TaxMP_MPAv2_NewWF_BGP_1_B.csv		Archaea	Unknown Kingdom	Euryarchaeota	Archaeoglobi	Archaeoglobales	Archaeoglobaceae	Archaeoglobus	Archaeoglobus fulgidus	Archaeoglobus fulgidus DSM 4304	7	11		TaxMP_MPAv2_NewWF_BGP_1_B.csv
	TaxMP_MPAv2_NewWF_BGP_1_B.csv		Bacteria	Unknown Kingdom	Aquificae	Aquificae	Aquificales	Aquificaceae	Aquifex	Aquifex aeolicus	Aquifex aeolicus VF5	4	6		TaxMP_MPAv2_NewWF_BGP_1_B.csv
	TaxMP_MPAv2_NewWF_BGP_1_B.csv		Bacteria	Unknown Kingdom	Proteobacteria	Gammaproteobacteria	Pseudomonadales	Pseudomonadaceae	Pseudomonas	Pseudomonas aeruginosa	Pseudomonas aeruginosa PAO1	5	5		TaxMP_MPAv2_NewWF_BGP_1_B.csv
	TaxMP_MPAv2_NewWF_BGP_1_B.csv		Bacteria	Unknown Kingdom	Tenericutes	Mollicutes	Mycoplasmatales	Mycoplasmataceae	Mycoplasma	Mycoplasma synoviae	Mycoplasma synoviae 53	1	1		TaxMP_MPAv2_NewWF_BGP_1_B.csv
	TaxMP_MPAv2_NewWF_BGP_1_B.csv		Bacteria	Unknown Kingdom	Proteobacteria	Deltaproteobacteria	Desulfuromonadales	Geobacteraceae	Geobacter	Unknown Species	Unknown Subspecies	1	2		TaxMP_MPAv2_NewWF_BGP_1_B.csv
	TaxMP_MPAv2_NewWF_BGP_1_B.csv		Bacteria	Unknown Kingdom	Thermotogae	Thermotogae	Thermotogales	Thermotogaceae	Thermotoga	Thermotoga maritima	Thermotoga maritima MSB8	29	59		TaxMP_MPAv2_NewWF_BGP_1_B.csv
	TaxMP_MPAv2_NewWF_BGP_1_B.csv		Bacteria	Unknown Kingdom	Tenericutes	Mollicutes	Mycoplasmatales	Mycoplasmataceae	Mycoplasma	Mycoplasma genitalium	Mycoplasma genitalium G37	1	2		TaxMP_MPAv2_NewWF_BGP_1_B.csv
	TaxMP_MPAv2_NewWF_BGP_1_B.csv		Archaea	Unknown Kingdom	Euryarchaeota	Thermococci	Thermococcales	Thermococcaceae	Thermococcus	Thermococcus litoralis	Thermococcus litoralis DSM 5473	18	40		TaxMP_MPAv2_NewWF_BGP_1_B.csv
	TaxMP_MPAv2_NewWF_BGP_1_B.csv		Bacteria	Unknown Kingdom	Firmicutes	Clostridia	Clostridiales	Heliobacteriaceae	Heliobacterium	Heliobacterium modesticaldum	Heliobacterium modesticaldum Ice1	1	1		TaxMP_MPAv2_NewWF_BGP_1_B.csv
	TaxMP_MPAv2_NewWF_BGP_1_B.csv		Bacteria	Unknown Kingdom	Spirochaetes	Spirochaetia	Spirochaetales	Spirochaetaceae	Treponema	Treponema pallidum subsp. pallidum str. Nichols	Treponema pallidum subsp. pallidum	34	79		TaxMP_MPAv2_NewWF_BGP_1_B.csv
	TaxMP_MPAv2_NewWF_BGP_1_B.csv		Bacteria	Unknown Kingdom	Firmicutes	Bacilli	Lactobacillales	Streptococcaceae	Streptococcus	Streptococcus mutans	Streptococcus mutans UA159	6	10		TaxMP_MPAv2_NewWF_BGP_1_B.csv
	TaxMP_MPAv2_NewWF_BGP_1_B.csv		Bacteria	Unknown Kingdom	Proteobacteria	Alphaproteobacteria	Rhizobiales	Rhizobiaceae	Sinorhizobium	Sinorhizobium meliloti	Sinorhizobium meliloti 1021	13	36		TaxMP_MPAv2_NewWF_BGP_1_B.csv
	TaxMP_MPAv2_NewWF_BGP_1_B.csv		Bacteria	Unknown Kingdom	Spirochaetes	Spirochaetia	Spirochaetales	Spirochaetaceae	Borrelia	Borrelia afzelii	Borrelia afzelii PKo	1	1		TaxMP_MPAv2_NewWF_BGP_1_B.csv
	TaxMP_MPAv2_NewWF_BGP_1_B.csv		Bacteria	Unknown Kingdom	Firmicutes	Bacilli	Bacillales	Staphylococcaceae	Staphylococcus	Staphylococcus aureus	Staphylococcus aureus subsp. aureus	4	8		TaxMP_MPAv2_NewWF_BGP_1_B.csv
	TaxMP_MPAv2_NewWF_BGP_1_B.csv		Eukaryota	Fungi	Ascomycota	Sordariomycetes	Unknown Order	Unknown Family	Unknown Genus	Unknown Species	Unknown Subspecies	1	1		TaxMP_MPAv2_NewWF_BGP_1_B.csv
	TaxMP_MPAv2_NewWF_BGP_1_B.csv		Eukaryota	Metazoa	Chordata	Mammalia	Unknown Order	Suidae	Sus	Sus scrofa	Unknown Subspecies	4	4		TaxMP_MPAv2_NewWF_BGP_1_B.csv
	TaxMP_MPAv2_NewWF_BGP_1_B.csv		Eukaryota	Metazoa	Nematoda	Chromadorea	Rhabditida	Rhabditidae	Caenorhabditis	Caenorhabditis elegans	Unknown Subspecies	2	3		TaxMP_MPAv2_NewWF_BGP_1_B.csv
	TaxMP_MPAv2_NewWF_BGP_1_B.csv		Bacteria	Unknown Kingdom	Firmicutes	Bacilli	Bacillales	Listeriaceae	Listeria	Unknown Species	Unknown Subspecies	7	11		TaxMP_MPAv2_NewWF_BGP_1_B.csv
	TaxMP_MPAv2_NewWF_BGP_1_B.csv		Bacteria	Unknown Kingdom	Firmicutes	Clostridia	Clostridiales	Clostridiaceae	Clostridium	Clostridium beijerinckii	Clostridium beijerinckii NCIMB 8052	2	3		TaxMP_MPAv2_NewWF_BGP_1_B.csv
	TaxMP_MPAv2_NewWF_BGP_1_B.csv		Archaea	Unknown Kingdom	Euryarchaeota	Thermococci	Thermococcales	Thermococcaceae	Pyrococcus	Pyrococcus sp. GB-3A	Unknown Subspecies	1	4		TaxMP_MPAv2_NewWF_BGP_1_B.csv
	TaxMP_MPAv2_NewWF_BGP_1_B.csv		Viruses	Unknown Kingdom	Unknown Phylum	Unknown Class	Caudovirales	Siphoviridae	Unknown Genus	Staphylococcus phage phiMR11	Unknown Subspecies	5	7		TaxMP_MPAv2_NewWF_BGP_1_B.csv
	TaxMP_MPAv2_NewWF_BGP_1_B.csv		Archaea	Unknown Kingdom	Euryarchaeota	Methanobacteria	Methanobacteriales	Unknown Family	Unknown Genus	Unknown Species	Unknown Subspecies	7	14		TaxMP_MPAv2_NewWF_BGP_1_B.csv
	TaxMP_MPAv2_NewWF_BGP_1_B.csv		Bacteria	Unknown Kingdom	Firmicutes	Clostridia	Clostridiales	Clostridiales Family XVIII. Incertae Sedis	Symbiobacterium	Symbiobacterium thermophilum	Symbiobacterium thermophilum IAM 14863	3	3		TaxMP_MPAv2_NewWF_BGP_1_B.csv
	TaxMP_MPAv2_NewWF_BGP_1_B.csv		Bacteria	Unknown Kingdom	Proteobacteria	Gammaproteobacteria	Enterobacteriales	Enterobacteriaceae	Shigella	Shigella flexneri	Unknown Subspecies	2	5		TaxMP_MPAv2_NewWF_BGP_1_B.csv
	TaxMP_MPAv2_NewWF_BGP_1_B.csv		Archaea	Unknown Kingdom	Euryarchaeota	Methanobacteria	Methanobacteriales	Methanobacteriaceae	Methanobacterium	Methanobacterium formicicum	Unknown Subspecies	3	7		TaxMP_MPAv2_NewWF_BGP_1_B.csv
	TaxMP_MPAv2_NewWF_BGP_1_B.csv		Bacteria	Unknown Kingdom	Tenericutes	Mollicutes	Acholeplasmatales	Acholeplasmataceae	Candidatus Phytoplasma	Onion yellows phytoplasma	Onion yellows phytoplasma OY-M	1	2		TaxMP_MPAv2_NewWF_BGP_1_B.csv
	TaxMP_MPAv2_NewWF_BGP_1_B.csv		Archaea	Unknown Kingdom	Euryarchaeota	Methanococci	Methanococcales	Methanococcaceae	Methanococcus	Methanococcus maripaludis	Methanococcus maripaludis S2	1	1		TaxMP_MPAv2_NewWF_BGP_1_B.csv
	TaxMP_MPAv2_NewWF_BGP_1_B.csv		Eukaryota	Viridiplantae	Streptophyta	Unknown Class	Brassicales	Brassicaceae	Arabidopsis	Arabidopsis thaliana	Unknown Subspecies	17	28		TaxMP_MPAv2_NewWF_BGP_1_B.csv
	TaxMP_MPAv2_NewWF_BGP_1_B.csv		Viruses	Unknown Kingdom	Unknown Phylum	Unknown Class	Unknown Order	Inoviridae	Inovirus	Pseudomonas phage Pf3	Unknown Subspecies	1	2		TaxMP_MPAv2_NewWF_BGP_1_B.csv
	TaxMP_MPAv2_NewWF_BGP_1_B.csv		Bacteria	Unknown Kingdom	Tenericutes	Mollicutes	Mycoplasmatales	Mycoplasmataceae	Mycoplasma	Mycoplasma agalactiae	Mycoplasma agalactiae PG2	1	1		TaxMP_MPAv2_NewWF_BGP_1_B.csv
	TaxMP_MPAv2_NewWF_BGP_1_B.csv		Bacteria	Unknown Kingdom	Proteobacteria	Epsilonproteobacteria	Campylobacterales	Campylobacteraceae	Arcobacter	Arcobacter butzleri	Arcobacter butzleri RM4018	2	4		TaxMP_MPAv2_NewWF_BGP_1_B.csv
	TaxMP_MPAv2_NewWF_BGP_1_B.csv		Bacteria	Unknown Kingdom	Tenericutes	Mollicutes	Mycoplasmatales	Mycoplasmataceae	Mycoplasma	Mycoplasma hominis	Mycoplasma hominis ATCC 23114	3	3		TaxMP_MPAv2_NewWF_BGP_1_B.csv
	TaxMP_MPAv2_NewWF_BGP_1_B.csv		Bacteria	Unknown Kingdom	Proteobacteria	Alphaproteobacteria	Rhodobacterales	Rhodobacteraceae	Paracoccus	Paracoccus denitrificans	Paracoccus denitrificans PD1222	2	2		TaxMP_MPAv2_NewWF_BGP_1_B.csv
	TaxMP_MPAv2_NewWF_BGP_1_B.csv		Eukaryota	Unknown Kingdom	Unknown Phylum	Unknown Class	Unknown Order	Unknown Family	Entamoeba	Entamoeba histolytica	Unknown Subspecies	4	12		TaxMP_MPAv2_NewWF_BGP_1_B.csv
	TaxMP_MPAv2_NewWF_BGP_1_B.csv		Bacteria	Unknown Kingdom	Firmicutes	Bacilli	Bacillales	Paenibacillaceae	Brevibacillus	Brevibacillus choshinensis	Unknown Subspecies	2	2		TaxMP_MPAv2_NewWF_BGP_1_B.csv
	TaxMP_MPAv2_NewWF_BGP_1_B.csv		Archaea	Unknown Kingdom	Euryarchaeota	Thermococci	Thermococcales	Thermococcaceae	Pyrococcus	Pyrococcus furiosus	Pyrococcus furiosus DSM 3638	12	21		TaxMP_MPAv2_NewWF_BGP_1_B.csv
	TaxMP_MPAv2_NewWF_BGP_1_B.csv		Eukaryota	Metazoa	Chordata	Mammalia	Unknown Order	Unknown Family	Unknown Genus	Unknown Species	Unknown Subspecies	1	3		TaxMP_MPAv2_NewWF_BGP_1_B.csv
	TaxMP_MPAv2_NewWF_BGP_1_B.csv		Archaea	Unknown Kingdom	Euryarchaeota	Methanobacteria	Methanobacteriales	Methanothermaceae	Methanothermus	Methanothermus fervidus	Unknown Subspecies	11	71		TaxMP_MPAv2_NewWF_BGP_1_B.csv
	TaxMP_MPAv2_NewWF_BGP_1_B.csv		Bacteria	Unknown Kingdom	Firmicutes	Bacilli	Bacillales	Bacillaceae	Bacillus	Bacillus clausii	Bacillus clausii KSM-K16	1	2		TaxMP_MPAv2_NewWF_BGP_1_B.csv
	TaxMP_MPAv2_NewWF_BGP_1_B.csv		Eukaryota	Fungi	Ascomycota	Schizosaccharomycetes	Schizosaccharomycetales	Schizosaccharomycetaceae	Schizosaccharomyces	Schizosaccharomyces pombe	Schizosaccharomyces pombe 972h-	1	2		TaxMP_MPAv2_NewWF_BGP_1_B.csv
	TaxMP_MPAv2_NewWF_BGP_1_B.csv		Bacteria	Unknown Kingdom	Firmicutes	Clostridia	Halanaerobiales	Halanaerobiaceae	Halothermothrix	Halothermothrix orenii	Halothermothrix orenii H 168	1	1		TaxMP_MPAv2_NewWF_BGP_1_B.csv
	TaxMP_MPAv2_NewWF_BGP_1_B.csv		Bacteria	Unknown Kingdom	Spirochaetes	Spirochaetia	Spirochaetales	Spirochaetaceae	Borrelia	Unknown Species	Unknown Subspecies	1	1		TaxMP_MPAv2_NewWF_BGP_1_B.csv
	TaxMP_MPAv2_NewWF_BGP_1_B.csv		Bacteria	Unknown Kingdom	Cyanobacteria	Unknown Class	Chroococcales	Unknown Family	Synechocystis	Synechocystis sp. PCC 6803	Synechocystis sp. PCC 6803 substr. Kazusa	7	11		TaxMP_MPAv2_NewWF_BGP_1_B.csv
	TaxMP_MPAv2_NewWF_BGP_1_B.csv		Bacteria	Unknown Kingdom	Proteobacteria	Gammaproteobacteria	Enterobacteriales	Enterobacteriaceae	Shigella	Shigella flexneri 5 str. 8401	Shigella flexneri 5	3	13		TaxMP_MPAv2_NewWF_BGP_1_B.csv
	TaxMP_MPAv2_NewWF_BGP_1_B.csv		Archaea	Unknown Kingdom	Euryarchaeota	Methanomicrobia	Methanomicrobiales	Unknown Family	Unknown Genus	Unknown Species	Unknown Subspecies	1	1		TaxMP_MPAv2_NewWF_BGP_1_B.csv
	TaxMP_MPAv2_NewWF_BGP_1_B.csv		Bacteria	Unknown Kingdom	Firmicutes	Negativicutes	Selenomonadales	Acidaminococcaceae	Acidaminococcus	Acidaminococcus fermentans	Acidaminococcus fermentans DSM 20731	2	4		TaxMP_MPAv2_NewWF_BGP_1_B.csv
	TaxMP_MPAv2_NewWF_BGP_1_B.csv		Bacteria	Unknown Kingdom	Cyanobacteria	Unknown Class	Nostocales	Nostocaceae	Nostoc	Nostoc sp. PCC 7119	Unknown Subspecies	1	1		TaxMP_MPAv2_NewWF_BGP_1_B.csv
	TaxMP_MPAv2_NewWF_BGP_1_B.csv		Eukaryota	Unknown Kingdom	Unknown Phylum	Unknown Class	Dictyosteliida	Unknown Family	Dictyostelium	Dictyostelium discoideum	Unknown Subspecies	6	11		TaxMP_MPAv2_NewWF_BGP_1_B.csv
	TaxMP_MPAv2_NewWF_BGP_1_B.csv		Bacteria	Unknown Kingdom	Proteobacteria	Gammaproteobacteria	Alteromonadales	Shewanellaceae	Shewanella	Shewanella sediminis	Shewanella sediminis HAW-EB3	1	1		TaxMP_MPAv2_NewWF_BGP_1_B.csv
	TaxMP_MPAv2_NewWF_BGP_1_B.csv		Archaea	Unknown Kingdom	Euryarchaeota	Methanomicrobia	Methanosarcinales	Methanosarcinaceae	Unknown Genus	Unknown Species	Unknown Subspecies	3	6		TaxMP_MPAv2_NewWF_BGP_1_B.csv
	TaxMP_MPAv2_NewWF_BGP_1_B.csv		Archaea	Unknown Kingdom	Euryarchaeota	Methanomicrobia	Methanosarcinales	Methanosarcinaceae	Methanosarcina	Unknown Species	Unknown Subspecies	89	301		TaxMP_MPAv2_NewWF_BGP_1_B.csv
	TaxMP_MPAv2_NewWF_BGP_1_B.csv		Bacteria	Unknown Kingdom	Proteobacteria	Gammaproteobacteria	Vibrionales	Vibrionaceae	Vibrio	Vibrio vulnificus	Unknown Subspecies	3	12		TaxMP_MPAv2_NewWF_BGP_1_B.csv
	TaxMP_MPAv2_NewWF_BGP_1_B.csv		Bacteria	Unknown Kingdom	Firmicutes	Clostridia	Clostridiales	Clostridiaceae	Clostridium	Clostridium aminobutyricum	Unknown Subspecies	1	4		TaxMP_MPAv2_NewWF_BGP_1_B.csv
	TaxMP_MPAv2_NewWF_BGP_1_B.csv		Archaea	Unknown Kingdom	Euryarchaeota	Methanomicrobia	Methanosarcinales	Methanosarcinaceae	Methanosarcina	Methanosarcina thermophila	Unknown Subspecies	7	19		TaxMP_MPAv2_NewWF_BGP_1_B.csv
	TaxMP_MPAv2_NewWF_BGP_1_B.csv		Archaea	Unknown Kingdom	Crenarchaeota	Thermoprotei	Sulfolobales	Sulfolobaceae	Sulfolobus	Sulfolobus tokodaii	Sulfolobus tokodaii str. 7	1	1		TaxMP_MPAv2_NewWF_BGP_1_B.csv
	TaxMP_MPAv2_NewWF_BGP_1_B.csv		Eukaryota	Viridiplantae	Streptophyta	Unknown Class	Unknown Order	Unknown Family	Unknown Genus	Unknown Species	Unknown Subspecies	1	4		TaxMP_MPAv2_NewWF_BGP_1_B.csv
	TaxMP_MPAv2_NewWF_BGP_1_B.csv		Bacteria	Unknown Kingdom	Firmicutes	Clostridia	Thermoanaerobacterales	Thermoanaerobacteraceae	Caldanaerobacter	Thermoanaerobacter tengcongensis MB4	Caldanaerobacter subterraneus subsp. tengcongensis	5	6		TaxMP_MPAv2_NewWF_BGP_1_B.csv
	TaxMP_MPAv2_NewWF_BGP_1_B.csv		Bacteria	Unknown Kingdom	Proteobacteria	Alphaproteobacteria	Rhizobiales	Rhizobiaceae	Agrobacterium	Agrobacterium fabrum	Agrobacterium fabrum str. C58	6	16		TaxMP_MPAv2_NewWF_BGP_1_B.csv
	TaxMP_MPAv2_NewWF_BGP_1_B.csv		Bacteria	Unknown Kingdom	Firmicutes	Bacilli	Bacillales	Bacillaceae	Bacillus	Bacillus pseudofirmus	Bacillus pseudofirmus OF4	1	1		TaxMP_MPAv2_NewWF_BGP_1_B.csv
	TaxMP_MPAv2_NewWF_BGP_1_B.csv		Bacteria	Unknown Kingdom	Firmicutes	Bacilli	Bacillales	Bacillaceae	Bacillus	Bacillus halodurans	Bacillus halodurans C-125	13	26		TaxMP_MPAv2_NewWF_BGP_1_B.csv
[truncated: 6,368 more rows]

## Sheet: TaxCount Spectra v1
Name	Superkingdom	Kingdom	Phylum	Class	Order	Family	Genus	Species	Subspecies	No. Peptides	Spectral Count (Krona)	Unknown Superkingdom	114036	Unknown Kingdom	114315	Unknown Phylum	114632	Unknown Class	115869	Unknown Order	116294	Unknown Family	116371	Unknown Genus	116590	Unknown Species	116887	Unknown Subspecies	118645
[truncated: 1,517 more rows]

[truncated: 2 more sheets: TaxCount Spectra v2, FIGURE Taxonomy Spectral count]
