# Supplementary material for: A Robust and Universal Metaproteomics Workflow for Research Studies and Routine Diagnostics Within 24 h Using Phenol Extraction, FASP Digest, and the MetaProteomeAnalyzer
Source: Front Microbiol. 2019 Aug 16;10:1883. doi: 10.3389/fmicb.2019.01883 (PMC6707425; doi:10.3389/fmicb.2019.01883)
Supplement: TABLE S7 — Protein quantification. [file Table_7.XLSX]

## Sheet: DESCRIPTION
General description
This File contains the data and analysis for protein quantification with amdio black staining
Overview table sheets
Table	Content
Summary tables	Summarizes the protein quantitation results, contains subtable for results of each sample and subtable with results for average of technical replicates
Biogas	Linear regression / analysis for biogas samples
Human Gut	Linear regression / analysis for human gut samples
Soil Compost WWTP	Linear regression / analysis for for soil samples, compost and WWTP samples, Re-Analysis since first attempt failed
table sheet description/legend
Summary Tables
This table sheet summarizes the quantitation results, contains subtable for results of each sample and subtable with results for average of technical replicates
Column	Description
Sample	Which sample this row refers to
New workflow protein concentration[mg/ml]	Protein conncentration for this sample using the new lab workflow (before FASP digestion)
Previous workflow protein concentration in [mg/ml]	Protein conncentration for this sample using the old lab workflow (before SDS-PAGE)
Other tables with linear regression analysis
The table sheets "Biogas", "Human Gut" and "Soil Compost WWTP" contain the linear regression analysis and quantification calculation for the respective samples
This is a standardized table sheet used for all amido black quantitations in our lab

## Sheet: Summary tables
Table for protein concentration all samples
Sample	New workflow protein concentration [mg/ml]	Old workflow protein concentration in [mg/ml]
BGP_1_A	2.63491	5.32135
BGP_1_B	1.9688	5.364
BGP_1_C	1.78734	4.76496
BGP_2_A	1.83154	3.84919
BGP_2_B	2.2247	5.16044
BGP_2_C	2.48835	5.28646
BGP_3_A	3.11104	5.39308
BGP_3_B	2.56977	6.06191
BGP_3_C	2.61157	5.63735
Hgut_1_A	6.86711	8.44324
Hgut_1_B	7.95772	9.75628
Hgut_1_C	7.25696	8.48629
Hgut_2_A	9.89021	10.1246
Hgut_2_B	12.6478	10.4833
Hgut_2_C	10.2753	9.48123
Hgut_3_A	8.83069	8.92636
Hgut_3_B	7.5894	8.89048
Hgut_3_C	9.3736	13.3916
WWTP_A	0.438137	0.922781
WWTP_B	0.607188	0.930131
WWTP_C	0.590191	0.815286
Soil_A	0.652207	0.639804
Soil_B	0.767511	0.516691
Soil_C	0.65726	0.36923
Compost_A	1.22275	1.70235
Compost_B	0.999497	1.81719
Compost_C	1.49654	1.68581
Table for average protein concentration (average over technical replicates)
Sample	New workflow, average protein concentration [mg/ml]	Old workflow, average protein concentration [mg/ml]
BGP_1	2.13035	5.15011
BGP_2	2.18153	4.76536
BGP_3	2.76413	5.69744
Hgut_1	7.3606	8.89527
Hgut_2	10.9378	10.0297
Hgut_3	8.5979	10.4028
WWTP	0.545172	0.889399
Soil*	0.692326	0.508575
Compost	1.2396	1.73511

## Sheet: Biogas
Analysis amido black protein quantitation
Date	2017-03-23
Concentration in [µg/µl]	Volume BSA [0,1µg/µl] in [µl]	Volume BSA [1µg/µl] in [µl]	Volume lysis buffer in [µl]	1. Measurement	2. Measurement	3. Measurement	Average	Standard deviation	Standard deviation in [%]
0		0	50	0.009	0.006	0.005	0.00666667	0.00169967	0.254951
0.2		10	40	0.13	0.15	0.139	0.139667	0.00817856	0.0585577
0.4		20	30	0.312	0.316	0.314	0.314	0.00163299	0.00520062
0.6		30	20	0.462	0.479	0.43	0.457	0.0203142	0.0444512
0.8		40	10	0.649	0.678	0.702	0.676333	0.0216692	0.0320393
1		50	0	0.835	0.877	0.867	0.859667	0.0179134	0.0208376
							y=mx+n
							y= protein concentration:
							x= absorbtion:
							m= slope	0.859714
							n= y-intercept	-0.0209683
Name	1. Measurement	2. Measurement	3. Measurement	Average	Dilution factor	Protein concentration in [µg/µl]	Amount SDS (25µg) in [µl]	Amount for 2D Gel (150 µg) in [µl]	Total	100µg
01_BGP_1_A_new	1.111	1.137	1.087	1.11167	2	2.63491	9.48799	56.9279	2634.91	37.952	01_BGP_1_A_new
01_BGP_1_B_new	0.809	0.828	0.839	0.825333	2	1.9688	12.6981	76.1886	1968.8	50.7924	01_BGP_1_B_new
01_BGP_1_C_new	0.739	0.745	0.758	0.747333	2	1.78734	13.9873	83.9235	1787.34	55.949	01_BGP_1_C_new
01_BGP_1_A_old	0.825	0.917	0.94	0.894	5	5.32135	4.69806	28.1883	5321.35	18.7922	01_BGP_1_A_old
01_BGP_1_B_old	0.884	0.928	0.892	0.901333	5	5.364	4.6607	27.9642	5364	18.6428	01_BGP_1_B_old
01_BGP_1_C_old	0.784	0.824	0.787	0.798333	5	4.76496	5.24663	31.4798	4764.96	20.9865	01_BGP_1_C_old
02_BGP_2_A_new	0.761	0.779	0.759	0.766333	2	1.83154	13.6497	81.8982	1831.54	54.5988	02_BGP_2_A_new
02_BGP_2_B_new	0.956	0.909	0.941	0.935333	2	2.2247	11.2375	67.4249	2224.7	44.95	02_BGP_2_B_new
02_BGP_2_C_new	1.05	1.04	1.056	1.04867	2	2.48835	10.0468	60.2809	2488.35	40.1873	02_BGP_2_C_new
02_BGP_2_A_old	0.772	0.808	0.839	0.806333	4	3.84919	6.49487	38.9692	3849.19	25.9795	02_BGP_2_A_old
02_BGP_2_B_old	0.871	0.85	0.878	0.866333	5	5.16044	4.84454	29.0673	5160.44	19.3782	02_BGP_2_B_old
02_BGP_2_C_old	0.807	0.875	0.982	0.888	5	5.28646	4.72907	28.3744	5286.46	18.9163	02_BGP_2_C_old
03_BGP_3_A_new	1.296	1.32	1.333	1.31633	2	3.11104	8.03591	48.2154	3111.04	32.1436	03_BGP_3_A_new
03_BGP_3_B_new	1.065	1.087	1.099	1.08367	2	2.56977	9.72849	58.3709	2569.77	38.914	03_BGP_3_B_new
03_BGP_3_C_new	0.543	0.527	0.551	0.540333	4	2.61157	9.57278	57.4367	2611.57	38.2911	03_BGP_3_C_new
03_BGP_3_A_old	0.892	0.915	0.912	0.906333	5	5.39308	4.63557	27.8134	5393.08	18.5423	03_BGP_3_A_old
03_BGP_3_B_old	1.06	1	1.004	1.02133	5	6.06191	4.12411	24.7447	6061.91	16.4965	03_BGP_3_B_old
03_BGP_3_C_old	0.874	0.95	1.021	0.948333	5	5.63735	4.43471	26.6083	5637.35	17.7388	03_BGP_3_C_old

## Sheet: Human Gut
Analysis amido black protein quantitation
Date	2017-04-06
Concentration in [µg/µl]	Volume BSA [0,1µg/µl] in [µl]	Volume BSA [1µg/µl] in [µl]	Volume lysis buffer in [µl]	1. Measurement	2. Measurement	3. Measurement	Average	Standard deviation	Standard deviation in [%]
0		0	50	0.009	0.002	0.009	0.00666667	0.00329983	0.494975
0.2		10	40	0.245	0.219	0.236	0.233333	0.0107806	0.0462027
0.4		20	30	0.515	0.512	0.515	0.514	0.00141421	0.00275139
0.6		30	20	0.8	0.773	0.816	0.796333	0.0177451	0.0222835
0.8		40	10	1.106	1.07	1.116	1.09733	0.019754	0.0180019
1		50	0	1.398	1.346	1.405	1.383	0.0263186	0.0190301
							y=mx+n
							y= protein concentration:
							x= absorbtion:
							m= slope	1.39371
							n= y-intercept	-0.0250794
Name	1. Measurement	2. Measurement	3. Measurement	Average	Dilution factor	Protein concentration in [µg/µl]	Amount SDS (25µg) in [µl]	Amount for 2D Gel (150 µg) in [µl]	Total	100µg
04_Hgut_3_A_new	1.188	1.209	1.22	1.20567	10	8.83069	2.83104	16.9862	8830.69	11.3241	04_Hgut_3_A_new
04_Hgut_3_B_new	1.051	0.994	1.053	1.03267	10	7.5894	3.29407	19.7644	7589.4	13.1763	04_Hgut_3_B_new
04_Hgut_3_C_new	1.343	1.237	1.264	1.28133	10	9.3736	2.66706	16.0024	9373.6	10.6683	04_Hgut_3_C_new
04_Hgut_3_A_old	1.216	1.105	1.336	1.219	10	8.92636	2.80069	16.8042	8926.36	11.2028	04_Hgut_3_A_old
04_Hgut_3_B_old	1.168	1.238	1.236	1.214	10	8.89048	2.812	16.872	8890.48	11.248	04_Hgut_3_B_old
04_Hgut_3_C_old	1.78	1.86	1.884	1.84133	10	13.3916	1.86684	11.201	13391.6	7.46734	04_Hgut_3_C_old
05_Hgut_2_A_new	1.356	1.288	1.416	1.35333	10	9.89021	2.52775	15.1665	9890.21	10.111	05_Hgut_2_A_new
05_Hgut_2_B_new	1.51	1.64	2.063	1.73767	10	12.6478	1.97662	11.8597	12647.8	7.9065	05_Hgut_2_B_new
05_Hgut_2_C_new	1.416	1.35	1.455	1.407	10	10.2753	2.43303	14.5982	10275.3	9.7321	05_Hgut_2_C_new
05_Hgut_2_A_old	1.399	1.412	1.347	1.386	10	10.1246	2.46923	14.8154	10124.6	9.87694	05_Hgut_2_A_old
05_Hgut_2_B_old	1.438	1.443	1.427	1.436	10	10.4833	2.38473	14.3084	10483.3	9.53894	05_Hgut_2_B_old
05_Hgut_2_C_old	1.326	1.355	1.208	1.29633	10	9.48123	2.63679	15.8207	9481.23	10.5472	05_Hgut_2_C_old
06_Hgut_1_A_new	0.934	0.889	0.973	0.932	10	6.86711	3.64054	21.8432	6867.11	14.5622	06_Hgut_1_A_new
06_Hgut_1_B_new	1.061	1.093	1.098	1.084	10	7.95772	3.1416	18.8496	7957.72	12.5664	06_Hgut_1_B_new
06_Hgut_1_C_new	0.983	0.995	0.981	0.986333	10	7.25696	3.44497	20.6698	7256.96	13.7799	06_Hgut_1_C_new
06_Hgut_1_A_old	1.147	1.134	1.174	1.15167	10	8.44324	2.96095	17.7657	8443.24	11.8438	06_Hgut_1_A_old
06_Hgut_1_B_old	1.365	1.16	1.479	1.33467	10	9.75628	2.56245	15.3747	9756.28	10.2498	06_Hgut_1_B_old
06_Hgut_1_C_old	1.146	1.176	1.151	1.15767	10	8.48629	2.94593	17.6756	8486.29	11.7837	06_Hgut_1_C_old

## Sheet: Soil Compost WWTP
Analysis amido black protein quantitation
Date	2017-06-30
Concentration in [µg/µl]	Volume BSA [0,1µg/µl] in [µl]	Volume BSA [1µg/µl] in [µl]	Volume lysis buffer in [µl]	1. Measurement	2. Measurement	3. Measurement	Average	Standard deviation	Standard deviation in [%]
0		0	50	0.004	0.005	0.003	0.004	0.000816497	0.204124
0.2		10	40	0.131	0.124	0.129	0.128	0.00294392	0.0229994
0.4		20	30	0.311	0.303	0.302	0.305333	0.00402768	0.0131911
0.6		30	20	0.47	0.452	0.456	0.459333	0.00771722	0.0168009
0.8		40	10	0.612	0.597	0.522	0.577	0.03937	0.0682323
1		50	0	0.696	0.779	0.684	0.719667	0.0422401	0.0586939
							y=mx+n
							y= protein concentration:
							x= absorbtion:
							m= slope	0.725619
							n= y-intercept	0.00274603
Name	1. Measurement	2. Measurement	3. Measurement	Average	Dilution factor	Protein concentration in [µg/µl]	Amount SDS (25µg) in [µl]	Amount for 2D Gel (150 µg) in [µl]	Total	100µg
07_WWTP_A_new	0.519	0.223	0.22	0.320667	1	0.438137	57.0598	342.359	438.137	228.239	07_WWTP_A_new
07_WWTP_B_new	0.442	0.432	0.456	0.443333	1	0.607188	41.1734	247.04	607.188	164.694	07_WWTP_B_new
07_WWTP_C_new	0.427	0.435	0.431	0.431	1	0.590191	42.3592	254.155	590.191	169.437	07_WWTP_C_new
07_WWTP_A_old	0.659	0.679	0.679	0.672333	1	0.922781	27.092	162.552	922.781	108.368	07_WWTP_A_old
07_WWTP_B_old	0.684	0.675	0.674	0.677667	1	0.930131	26.8779	161.268	930.131	107.512	07_WWTP_B_old
07_WWTP_C_old	0.601	0.6	0.582	0.594333	1	0.815286	30.6641	183.984	815.286	122.656	07_WWTP_C_old
08_Soil_A_new	0.475	0.476	0.477	0.476	1	0.652207	38.3314	229.988	652.207	153.326	08_Soil_A_new
08_Soil_B_new	0.568	0.566	0.545	0.559667	1	0.767511	32.5728	195.437	767.511	130.291	08_Soil_B_new
08_Soil_C_new	0.464	0.49	0.485	0.479667	1	0.65726	38.0367	228.22	657.26	152.147	08_Soil_C_new
08_Soil_A_old	0.469	0.471	0.461	0.467	1	0.639804	39.0745	234.447	639.804	156.298	08_Soil_A_old
08_Soil_B_old	0.378	0.381	0.374	0.377667	1	0.516691	48.3848	290.309	516.691	193.539	08_Soil_B_old
08_Soil_C_old	0.273	0.256	0.283	0.270667	1	0.36923	67.7084	406.25	369.23	270.834	08_Soil_C_old
09_Compost_A_new	0.87	0.894	0.906	0.89	1	1.22275	20.4456	122.674	1222.75	81.7826	09_Compost_A_new
09_Compost_B_new	0.724	0.733	0.727	0.728	1	0.999497	25.0126	150.076	999.497	100.05	09_Compost_B_new
09_Compost_C_new	1.076	1.083	1.107	1.08867	1	1.49654	16.7052	100.231	1496.54	66.8206	09_Compost_C_new
09_Compost_A_old	1.209	1.271	1.234	1.238	1	1.70235	14.6856	88.1137	1702.35	58.7425	09_Compost_A_old
09_Compost_B_old	1.305	1.335	1.324	1.32133	1	1.81719	13.7575	82.5451	1817.19	55.03	09_Compost_B_old
09_Compost_C_old	1.212	1.245	1.221	1.226	1	1.68581	14.8297	88.9781	1685.81	59.3188	09_Compost_C_old
