# Supplementary material for: A Robust and Universal Metaproteomics Workflow for Research Studies and Routine Diagnostics Within 24 h Using Phenol Extraction, FASP Digest, and the MetaProteomeAnalyzer
Source: Front Microbiol. 2019 Aug 16;10:1883. doi: 10.3389/fmicb.2019.01883 (PMC6707425; doi:10.3389/fmicb.2019.01883)
Supplement: TABLE S8 — Identifications. [file Table_8.XLSX]

## Sheet: DESCRIPTION
General description
This file contains calculations and comparison figures for the number of identifications using different metrics (spectra, peptides, metaproteins, %spectra)
There is one comparison for New Worfkflow vs. Old Workflow (lab+MPA version), a comparison of average values alone, and a comparison of New Lab Workflow vs. Old Lab Workflow (using only MPAv2)
Figures from table sheet "Figures MPAv2 Ne Lab vs. Old" are used in the manuscript, adding some additional legend via MS Powerpoint
The table sheet "Acidification experimental data" shows data on acidification vs. lyophilization, which is referenced in the manuscript
Overview table sheets
Table	Content
COPY Sample Metadata + ID	A copy of the metadata table from Supplementary Table 4
Calculate Averages	Contains the relevant columns from the metadata table, calculation of average for specific sample types (technical and biological replicates), used in to create figures in Table "Figures Average New vs. Old"
Table Averages	Compilation of all the averages calculated in table "Calculate Averages", Figure of this data
Figure All samples New vs. Old	Contains figures to compare identifications of Metaproteins, Proteins, Peptides and Spectra for all 108 analyses separately, grouped by sample type (i.e. biogas, WWTP, human gut, soil)
Figures Average New vs. Old	Contains figures to compare identifications of Metaproteins, Proteins, Peptides and Spectra for the averages by sample type (i.e. biogas, WWTP, human gut, soil)
Table sheet description/legend
COPY of MPA Sample Metadata + ID
This table sheet is an exact copy of the table "MPA Sample Metadata + ID" in Supplementary table 4, It is the basis for all calculations and figures in this file
Column	Description
Sample	Which of the 54 LC-MS/MS runs
Version	Which MPA version was used
Tot Sp	Total amount of spectra during LC-MS/MS run
Id Spectra	Amount of spectra that have a PSM at the given FDR
Dnct Pep	Distinct peptides (Peptides with a unique sequence)
Unq Pep	Unique peptides (Peptides that are exclusive to a single protein)
Prot	Number of proteins identified
MeteProt	Number of metaproteins
Species	Number of species identified
PW	Number of KEGG pathways with at least one protein associated
Export MP	Export for metaproteins was done
Export TaxMP	Export for metaprotein Taxonomy was done
FDR?	False Discovery rate for this analysis (1% default, 5% for soil/compost)
Id SP Sum	Total number if identified spectra obtained from annotation analysis, is the sum of "Known SP and Unknown SP", this should be nearly identical to column "Id Spectra"
Known SP	From Annotation analysis, Number of metaproteins with a full annotation via BLAST or UniProt
Unknown SP	From Annotation analysis, Number of metaproteins without an annotation, metageonme proteins that did not yield a result via BLAST
Calculate Averages
Relevant colums from the metadata table sheet are used to calculate the average for a given sample type (i.e. biogas, human gut, WWTP, soil, compost)
Averages are calculated seperately for MPAv1 and MPAv2, averages are calculated for Metaproteins, Peptides, identified spectra, % identified Spectra
Column	Description
Sample	Which of the 54 LC-MS/MS runs
Version	Which MPA version was used
Idd Spectra	Amount of spectra that have a PSM at the given FDR
Dnct Pep	Distinct peptides (Peptides with a unique sequence)
MetaProt	Number of metaproteins
Tot Sp	Total amount of spectra during LC-MS/MS run
Spectra%	The percentage of identified spectra from total spectra measured in this LC-MS/MS run, calculated from columns Idd Spectra/TotSp
Columns H-L	Contains the average values for biological sample type
Table Averages
Compiles the averages from table sheet "Calculate Average" (Columns H-L)
The figure shows that no noticeable relative difference exists between the different methods to display identifications (i.e. metaproteins, peptides, spectra), this lead to the decision to use spectral counts for the manuscript
Column	Description
Sample	What the data represents: which laboratory workflow used (NewWF vs. OldWF), which sample type (Biogas, Human gut, Soil/Compost, WWTP), which MPA version used (v1.08 vs. v2.12)
Spectra	Average value for sample type for: Amount of spectra that have a PSM at the given FDR
Peptides	Average value for sample type for: Distinct peptides (Peptides with a unique sequence)
Metaproteins	Average value for sample type for: Number of metaproteins
%Spectra	Average value for sample type for: The percentage of identified spectra from total spectra measured in this LC-MS/MS run, calculated from columns Idd Spectra/TotSp
Figure All samples New vs. Old
Contains Comparison Figures for identifications from different perspectives
Contains sub-tables compiled from the main metadata table to create 4 different charts for Metaprotein-,Peptide-,Spectrum- and %Spectrum Identifications
Column	Description
Sample	Which of the 54 LC-MS/MS runs
Version	Which MPA version was used
Idd Spectra	Amount of spectra that have a PSM at the given FDR
Dnct Pep	Distinct peptides (Peptides with a unique sequence)
MeteProt	Number of metaproteins
Spectra%	The percentage of identified spectra from total spectra measured in this LC-MS/MS run, calculated from columns Idd Spectra/TotSp
Column H-P	Subtables that summarize/arrange the data from the full table as preparation for the figures, the subtables also contain average calculation
Figures Average New vs. Old
Contains Comparison Figures for identifications from different perspectives based on the average values from table sheet "Calculate Averages"
4 Subtable for Spectra, Peptides, Metaproteins, %Spectra are used to create the figures
There are 5 figures, the first shows the counts for spectra peptides and metaproteins together, comparing the different workflow configurations, the other four focus on an individual metric
Column	Description
Sample	Which of the 54 LC-MS/MS runs
Spectra	Average value as calculated in table sheet "Calculate Averages" for Amount of spectra that have a PSM at the given FDR
Peptides	Average value as calculated in table sheet "Calculate Averages" for Distinct peptides (Peptides with a unique sequence)
Metaproteins	Average value as calculated in table sheet "Calculate Averages" for Number of metaproteins
%Spectra	Average value as calculated in table sheet "Calculate Averages" for Percentage of identified spectra from total spectra measured in this LC-MS/MS run, calculated from columns Idd Spectra/TotSp
Figures MPAv2 New Lab vs. Old
Contains Comparison Figures for identifications from different perspectives, unlike the previous tables, this compares only samples processed with MPAv2 --> It’s a comparison of lab workflow alone
Contains sub-tables compiled from the main metadata table to create 4 different charts for Metaprotein-,Peptide-,Spectrum- and %Spectrum Identifications
There are three figures, 1 which displays the identified spectra for all samples, and 2 separate figures for the same data, which are used in the manuscript after additional annotation was added using MS Powerpoint
A students t test was performed for the spectral data that is used in figure 3 (the test is below the subtable)
Column	Description
Sample	Which of the 54 LC-MS/MS runs
Version	Which MPA version was used
Idd Spectra	Amount of spectra that have a PSM at the given FDR
Dnct Pep	Distinct peptides (Peptides with a unique sequence)
MeteProt	Number of metaproteins
Spectra%	The percentage of identified spectra from total spectra measured in this LC-MS/MS run, calculated from columns Idd Spectra/TotSp
Column H-P	Subtables that summarize/arrange the data from the full table as preparation for the figures, the subtables also contain average calculation
Acidifcation experimental Data
Contains number of Mascot protein groups for 6 re-measured samples showing the difference between acidification and lyophyliszation of peptide extract before LC-MS
The data shows no meaningful difference
The figure shows the number of identified Mascot protein groups for acidified and lyophilized samples. For lyophilization, 30 µl peptide extracts were dried in a SpeedVac and dissolved in 33 µl loading buffer A. For acidification, 30 µl of peptide extracts from the same sample were acidified with 3 µl of 0.5% TFA solution (1:200 dilution). Both samples contained 33 µl of which 5 µl were injected …
Column	Description
Sample	The sample used, these are re-measurements of the frozen samples, which were treated accordingly, marked as _lyophilized and _acidified
Count protein identifications (Mascot FDR 1%)	Number of reported Mascot protein groups

## Sheet: COPY Sample Metadata + ID
Sample	Version	Idd Spectra	Id SP Sum	Known SP	Unknown SP	Tot Sp	Dnct Pep	Unq Pep	Prot	MeteProt	Species	PW	Export MP	Export TaxMP	FDR?
NewWF_BGP_1_A	MPA v1	10398	10474	1030	9444	33672	4264	2656	3802	1583	263	71	Yes	Yes	FDR 1%
NewWF_BGP_1_B	MPA v1	9471	9550	823	8727	33684	3943	2467	3568	1499	247	73	Yes	Yes	FDR 1%
NewWF_BGP_1_C	MPA v1	8175	8255	714	7541	33849	3523	2200	3319	1388	251	68	Yes	Yes	FDR 1%
NewWF_BGP_2_A	MPA v1	8292	8344	766	7578	33801	3692	2329	3262	1365	253	70	Yes	Yes	FDR 1%
NewWF_BGP_2_B	MPA v1	6603	6647	562	6085	33722	3094	1963	2828	1245	249	52	Yes	Yes	FDR 1%
NewWF_BGP_2_C	MPA v1	6143	6183	576	5607	30795	3040	1888	2876	1155	245	55	Yes	Yes	FDR 1%
NewWF_BGP_3_A	MPA v1	6587	6625	474	6151	33434	3152	1961	3018	1261	232	47	Yes	Yes	FDR 1%
NewWF_BGP_3_B	MPA v1	5560	5587	324	5263	33227	2707	1719	2449	1014	210	49	Yes	Yes	FDR 1%
NewWF_BGP_3_C	MPA v1	4680	4641	342	4299	32901	2387	1524	2280	983	193	48	Yes	Yes	FDR 1%
NewWF_Compost_A	MPA v1	184	186	164	22	28274	149	79	253	105	169	75	Yes	Yes	FDR 5%
NewWF_Compost_B	MPA v1	165	169	143	26	27988	145	85	243	97	173	78	Yes	Yes	FDR 5%
NewWF_Compost_C	MPA v1	55	56	45	11	28023	51	40	63	36	47	56	Yes	Yes	FDR 5%
NewWF_Hgut_1_A	MPA v1	2773	2800	392	2408	31995	1743	641	2012	976	162	161	Yes	Yes	FDR 1%
NewWF_Hgut_1_B	MPA v1	2370	2405	459	1946	29989	1488	542	2661	878	140	119	Yes	Yes	FDR 1%
NewWF_Hgut_1_C	MPA v1	1897	1923	234	1689	32489	1210	480	2061	699	130	62	Yes	Yes	FDR 1%
NewWF_Hgut_2_A	MPA v1	3566	3607	431	3176	33202	2073	729	3614	1086	199	109	Yes	Yes	FDR 1%
NewWF_Hgut_2_B	MPA v1	2331	2355	388	1967	30837	1464	528	2542	826	153	92	Yes	Yes	FDR 1%
NewWF_Hgut_2_C	MPA v1	2599	2623	414	2209	31171	1615	585	2839	894	177	153	Yes	Yes	FDR 1%
NewWF_Hgut_3_A	MPA v1	3817	3862	1125	2737	32128	1915	465	3823	915	226	124	Yes	Yes	FDR 1%
NewWF_Hgut_3_B	MPA v1	3272	3321	673	2648	32961	1668	489	2994	778	182	121	Yes	Yes	FDR 1%
NewWF_Hgut_3_C	MPA v1	2721	2754	559	2195	31680	1540	455	2845	806	187	123	Yes	Yes	FDR 1%
NewWF_Soil_A	MPA v1	56	57	44	13	24882	42	35	38	27	23	48	Yes	Yes	FDR 5%
NewWF_Soil_B	MPA v1	76	76	53	23	25810	62	43	91	47	66	51	Yes	Yes	FDR 5%
NewWF_Soil_C	MPA v1	33	34	24	10	24382	33	29	41	25	25	34	Yes	Yes	FDR 5%
NewWF_WWTP_A	MPA v1	445	447	94	353	27951	318	206	457	215	68	50	Yes	Yes	FDR 1%
NewWF_WWTP_B	MPA v1	230	234	50	184	28699	179	113	278	134	63	51	Yes	Yes	FDR 1%
NewWF_WWTP_C	MPA v1	151	152	30	122	27319	103	60	161	83	30	40	Yes	Yes	FDR 1%
OldWF_BGP_1_A	MPA v1	6265	6306	591	5715	24788	2969	1804	2790	1205	215	60	Yes	Yes	FDR 1%
OldWF_BGP_1_B	MPA v1	3554	3571	416	3155	21250	1916	1123	1987	837	157	38	Yes	Yes	FDR 1%
OldWF_BGP_1_C	MPA v1	3740	3760	590	3170	21348	1984	1171	2027	880	150	49	Yes	Yes	FDR 1%
OldWF_BGP_2_A	MPA v1	541	543	69	474	20984	358	204	463	219	60	25	Yes	Yes	FDR 1%
OldWF_BGP_2_B	MPA v1	1007	1010	118	892	23809	660	380	757	337	76	28	Yes	Yes	FDR 1%
OldWF_BGP_2_C	MPA v1	734	737	107	630	21247	518	306	609	285	57	23	Yes	Yes	FDR 1%
OldWF_BGP_3_A	MPA v1	1398	1404	88	1316	23143	931	554	1023	458	90	22	Yes	Yes	FDR 1%
OldWF_BGP_3_B	MPA v1	1419	1429	144	1285	24184	938	550	1014	458	85	29	Yes	Yes	FDR 1%
OldWF_BGP_3_C	MPA v1	1201	1211	107	1104	23848	794	463	892	405	82	25	Yes	Yes	FDR 1%
OldWF_Compost_A	MPA v1	18	18	16	2	20521	22	20	22	13	18	13	Yes	Yes	FDR 5%
OldWF_Compost_B	MPA v1	16	16	16	0	19945	11	10	11	10	6	0	Yes	Yes	FDR 5%
OldWF_Compost_C	MPA v1	0	0	0	0	21083	0	0	0	0	0	0	Yes	Yes	FDR 5%
OldWF_Hgut_1_A	MPA v1	731	744	128	616	27973	545	269	914	397	84	77	Yes	Yes	FDR 1%
OldWF_Hgut_1_B	MPA v1	211	214	53	161	27741	158	69	304	122	33	35	Yes	Yes	FDR 1%
OldWF_Hgut_1_C	MPA v1	675	685	103	582	27523	444	210	768	329	63	79	Yes	Yes	FDR 1%
OldWF_Hgut_2_A	MPA v1	632	635	125	510	28806	442	197	780	312	69	66	Yes	Yes	FDR 1%
OldWF_Hgut_2_B	MPA v1	566	568	83	485	28060	386	155	703	266	50	39	Yes	Yes	FDR 1%
OldWF_Hgut_2_C	MPA v1	270	270	46	224	28134	210	98	356	153	37	24	Yes	Yes	FDR 1%
OldWF_Hgut_3_A	MPA v1	1996	2006	470	1536	31168	1125	328	2018	580	128	80	Yes	Yes	FDR 1%
OldWF_Hgut_3_B	MPA v1	965	968	131	837	28891	609	237	1072	377	85	79	Yes	Yes	FDR 1%
OldWF_Hgut_3_C	MPA v1	763	769	183	586	28843	494	184	945	318	83	65	Yes	Yes	FDR 1%
OldWF_Soil_A	MPA v1	0	0	0	0	23083	0	0	0	0	0	0	Yes	Yes	FDR 5%
OldWF_Soil_B	MPA v1	0	0	0	0	22422	0	0	0	0	0	0	Yes	Yes	FDR 5%
OldWF_Soil_C	MPA v1	0	0	0	0	22350	0	0	0	0	0	0	Yes	Yes	FDR 5%
OldWF_WWTP_A	MPA v1	0	0	0	0	23945	0	0	0	0	0	0	Yes	Yes	FDR 1%
OldWF_WWTP_B	MPA v1	0	0	0	0	25509	0	0	0	0	0	0	Yes	Yes	FDR 1%
OldWF_WWTP_C	MPA v1	73	73	7	66	27145	42	31	66	36	13	16	Yes	Yes	FDR 1%
NewWF_BGP_1_A	MPA v2	10547	11018	8852	2166	33672	4425	2755	4090	1649	654	157	Yes	Yes	FDR 1%
NewWF_BGP_1_B	MPA v2	9664	10126	8126	2000	33684	4119	2582	3840	1561	637	156	Yes	Yes	FDR 1%
NewWF_BGP_1_C	MPA v2	8433	8903	7069	1834	33849	3739	2335	3600	1444	607	150	Yes	Yes	FDR 1%
NewWF_BGP_2_A	MPA v2	8496	8957	7231	1726	33801	3866	2453	3479	1421	560	152	Yes	Yes	FDR 1%
NewWF_BGP_2_B	MPA v2	6808	7167	5462	1705	33722	3250	2070	3045	1298	523	132	Yes	Yes	FDR 1%
NewWF_BGP_2_C	MPA v2	6273	6772	5320	1452	30795	3161	1859	3074	1189	539	139	Yes	Yes	FDR 1%
NewWF_BGP_3_A	MPA v2	6755	7224	5623	1601	33434	3299	2076	3202	1295	524	127	Yes	Yes	FDR 1%
NewWF_BGP_3_B	MPA v2	5708	6033	4526	1507	33227	2818	1808	2548	1046	480	125	Yes	Yes	FDR 1%
NewWF_BGP_3_C	MPA v2	4732	4954	3780	1174	32901	2490	1613	2380	1004	438	114	Yes	Yes	FDR 1%
NewWF_Compost_A	MPA v2	197	264	261	3	28274	169	100	264	114	182	79	Yes	Yes	FDR 5%
NewWF_Compost_B	MPA v2	186	260	256	4	27988	175	112	252	111	182	81	Yes	Yes	FDR 5%
NewWF_Compost_C	MPA v2	102	151	147	4	28023	102	81	118	64	87	64	Yes	Yes	FDR 5%
NewWF_Hgut_1_A	MPA v2	2946	3559	3180	379	31995	1974	828	3326	1069	224	166	Yes	Yes	FDR 1%
NewWF_Hgut_1_B	MPA v2	2530	2988	2643	345	29989	1671	667	2980	954	193	131	Yes	Yes	FDR 1%
NewWF_Hgut_1_C	MPA v2	2028	2327	2114	213	32489	1383	591	2326	745	184	67	Yes	Yes	FDR 1%
NewWF_Hgut_2_A	MPA v2	3775	4465	3972	493	33202	2348	898	4047	1184	256	102	Yes	Yes	FDR 1%
NewWF_Hgut_2_B	MPA v2	2536	3034	2721	313	30837	1687	662	2921	918	211	100	Yes	Yes	FDR 1%
NewWF_Hgut_2_C	MPA v2	2730	3124	2812	312	31171	1752	715	3014	953	208	161	Yes	Yes	FDR 1%
NewWF_Hgut_3_A	MPA v2	3881	4913	4564	349	32128	2032	1396	2216	948	316	162	Yes	Yes	FDR 1%
NewWF_Hgut_3_B	MPA v2	3509	4052	3775	277	32961	1900	622	3289	818	242	132	Yes	Yes	FDR 1%
NewWF_Hgut_3_C	MPA v2	2983	3394	3123	271	31680	1752	552	3200	854	241	149	Yes	Yes	FDR 1%
NewWF_Soil_A	MPA v2	76	85	83	2	24882	72	62	68	43	43	51	Yes	Yes	FDR 5%
NewWF_Soil_B	MPA v2	104	127	120	7	25810	94	72	115	64	80	55	Yes	Yes	FDR 5%
NewWF_Soil_C	MPA v2	69	75	73	2	24382	65	58	66	44	37	51	Yes	Yes	FDR 5%
NewWF_WWTP_A	MPA v2	566	662	589	73	27951	437	264	628	263	131	76	Yes	Yes	FDR 1%
NewWF_WWTP_B	MPA v2	368	420	375	45	28699	289	170	442	201	93	58	Yes	Yes	FDR 1%
NewWF_WWTP_C	MPA v2	251	153	137	16	27319	188	104	319	141	60	47	Yes	Yes	FDR 1%
OldWF_BGP_1_A	MPA v2	6403	6690	5309	1381	24788	3088	1890	2948	1233	514	134	Yes	Yes	FDR 1%
OldWF_BGP_1_B	MPA v2	3685	3855	3137	718	21250	2022	1172	2153	858	406	120	Yes	Yes	FDR 1%
OldWF_BGP_1_C	MPA v2	3848	4044	3278	766	21348	2087	1225	2187	907	419	119	Yes	Yes	FDR 1%
OldWF_BGP_2_A	MPA v2	647	677	514	163	20984	437	263	535	241	157	52	Yes	Yes	FDR 1%
OldWF_BGP_2_B	MPA v2	1048	1101	865	236	23809	689	423	743	348	191	74	Yes	Yes	FDR 1%
OldWF_BGP_2_C	MPA v2	800	838	662	176	21247	562	339	647	293	179	63	Yes	Yes	FDR 1%
OldWF_BGP_3_A	MPA v2	1494	1586	1191	395	23143	1006	619	1080	488	256	71	Yes	Yes	FDR 1%
OldWF_BGP_3_B	MPA v2	1487	1567	1160	407	24184	987	603	1047	468	246	97	Yes	Yes	FDR 1%
OldWF_BGP_3_C	MPA v2	1290	1367	1011	356	23848	856	517	952	425	231	78	Yes	Yes	FDR 1%
OldWF_Compost_A	MPA v2	25	29	27	2	20521	30	27	30	18	19	16	Yes	Yes	FDR 5%
OldWF_Compost_B	MPA v2	69	73	72	1	19945	56	55	43	32	28	35	Yes	Yes	FDR 5%
OldWF_Compost_C	MPA v2	5	6	6	0	21083	9	9	9	6	9	1	Yes	Yes	FDR 5%
OldWF_Hgut_1_A	MPA v2	834	994	906	88	27973	675	332	1139	460	123	93	Yes	Yes	FDR 1%
OldWF_Hgut_1_B	MPA v2	431	491	440	51	27741	359	198	564	254	81	67	Yes	Yes	FDR 1%
OldWF_Hgut_1_C	MPA v2	811	917	817	100	27523	579	276	976	399	108	98	Yes	Yes	FDR 1%
OldWF_Hgut_2_A	MPA v2	815	910	815	95	28806	616	258	1072	392	125	80	Yes	Yes	FDR 1%
OldWF_Hgut_2_B	MPA v2	639	734	653	81	28060	474	218	822	313	87	49	Yes	Yes	FDR 1%
OldWF_Hgut_2_C	MPA v2	417	485	432	53	28134	345	151	575	222	73	45	Yes	Yes	FDR 1%
OldWF_Hgut_3_A	MPA v2	2181	2542	2351	191	31168	1301	417	2307	628	199	86	Yes	Yes	FDR 1%
OldWF_Hgut_3_B	MPA v2	1071	1257	1160	97	28891	731	310	1219	419	120	105	Yes	Yes	FDR 1%
OldWF_Hgut_3_C	MPA v2	836	974	903	71	28843	585	253	1060	362	117	89	Yes	Yes	FDR 1%
OldWF_Soil_A	MPA v2	13	15	15	0	23083	15	15	14	10	13	7	Yes	Yes	FDR 5%
OldWF_Soil_B	MPA v2	11	12	12	0	22422	11	11	10	8	9	3	Yes	Yes	FDR 5%
OldWF_Soil_C	MPA v2	7	7	7	0	22350	7	7	7	5	7	23	Yes	Yes	FDR 5%
OldWF_WWTP_A	MPA v2	154	164	145	19	23945	94	61	97	56	21	8	Yes	Yes	FDR 1%
OldWF_WWTP_B	MPA v2	105	106	97	9	25509	83	49	108	54	26	10	Yes	Yes	FDR 1%
OldWF_WWTP_C	MPA v2	216	230	201	29	27145	151	87	222	106	45	22	Yes	Yes	FDR 1%

## Sheet: Calculate Averages
Sample	Version	Idd Spectra	Dnct Pep	MetaProt	Tot Sp	Spectra%
NewWF_BGP_1_A	MPA v1	10398	4264	1583	33672	0.308803
NewWF_BGP_1_B	MPA v1	9471	3943	1499	33684	0.281172
NewWF_BGP_1_C	MPA v1	8175	3523	1388	33849	0.241514
NewWF_BGP_2_A	MPA v1	8292	3692	1365	33801	0.245318
NewWF_BGP_2_B	MPA v1	6603	3094	1245	33722	0.195807
NewWF_BGP_2_C	MPA v1	6143	3040	1155	30795	0.19948
NewWF_BGP_3_A	MPA v1	6587	3152	1261	33434	0.197015
NewWF_BGP_3_B	MPA v1	5560	2707	1014	33227	0.167334		Idd Spectra	Dnct Pep	MeteProt	Spectra%
NewWF_BGP_3_C	MPA v1	4680	2387	983	32901	0.142245	NewWFv1 BGP	7323.22	3311.33	1277	0.219854
NewWF_Hgut_1_A	MPA v1	2773	1743	976	31995	0.0866698
NewWF_Hgut_1_B	MPA v1	2370	1488	878	29989	0.079029
NewWF_Hgut_1_C	MPA v1	1897	1210	699	32489	0.058389
NewWF_Hgut_2_A	MPA v1	3566	2073	1086	33202	0.107403
NewWF_Hgut_2_B	MPA v1	2331	1464	826	30837	0.075591
NewWF_Hgut_2_C	MPA v1	2599	1615	894	31171	0.0833788
NewWF_Hgut_3_A	MPA v1	3817	1915	915	32128	0.118806
NewWF_Hgut_3_B	MPA v1	3272	1668	778	32961	0.0992688		Idd Spectra	Dnct Pep	MeteProt	Spectra%
NewWF_Hgut_3_C	MPA v1	2721	1540	806	31680	0.0858902	NewWFv1 Hgut	2816.22	1635.11	873.111	0.0882695
NewWF_Compost_A	MPA v1	184	149	105	28274	0.00650775
NewWF_Compost_B	MPA v1	165	145	97	27988	0.00589538
NewWF_Compost_C	MPA v1	55	51	36	28023	0.00196267
NewWF_Soil_A	MPA v1	56	42	27	24882	0.00225062
NewWF_Soil_B	MPA v1	76	62	47	25810	0.0029446		Idd Spectra	Dnct Pep	MeteProt	Spectra%
NewWF_Soil_C	MPA v1	33	33	25	24382	0.00135346	NewWFv1 Soil+Compost	94.8333	80.3333	56.1667	0.00348575
NewWF_WWTP_A	MPA v1	445	318	215	27951	0.0159207
NewWF_WWTP_B	MPA v1	230	179	134	28699	0.00801422		Idd Spectra	Dnct Pep	MeteProt	Spectra%
NewWF_WWTP_C	MPA v1	151	103	83	27319	0.00552729	NewWFv1 WWTP	275.333	200	144	0.00982074
OldWF_BGP_1_A	MPA v1	6265	2969	1205	24788	0.252743
OldWF_BGP_1_B	MPA v1	3554	1916	837	21250	0.167247
OldWF_BGP_1_C	MPA v1	3740	1984	880	21348	0.175192
OldWF_BGP_2_A	MPA v1	541	358	219	20984	0.0257815
OldWF_BGP_2_B	MPA v1	1007	660	337	23809	0.0422949
OldWF_BGP_2_C	MPA v1	734	518	285	21247	0.0345461
OldWF_BGP_3_A	MPA v1	1398	931	458	23143	0.060407
OldWF_BGP_3_B	MPA v1	1419	938	458	24184	0.0586752		Idd Spectra	Dnct Pep	MeteProt	Spectra%
OldWF_BGP_3_C	MPA v1	1201	794	405	23848	0.0503606	OldWFv1 BGP	2206.56	1229.78	564.889	0.0963609
OldWF_Hgut_1_A	MPA v1	731	545	397	27973	0.0261323
OldWF_Hgut_1_B	MPA v1	211	158	122	27741	0.00760607
OldWF_Hgut_1_C	MPA v1	675	444	329	27523	0.0245249
OldWF_Hgut_2_A	MPA v1	632	442	312	28806	0.0219399
OldWF_Hgut_2_B	MPA v1	566	386	266	28060	0.0201711
OldWF_Hgut_2_C	MPA v1	270	210	153	28134	0.00959693
OldWF_Hgut_3_A	MPA v1	1996	1125	580	31168	0.06404
OldWF_Hgut_3_B	MPA v1	965	609	377	28891	0.0334014		Idd Spectra	Dnct Pep	MeteProt	Spectra%
OldWF_Hgut_3_C	MPA v1	763	494	318	28843	0.0264536	OldWFv1 Hgut	756.556	490.333	317.111	0.0259851
OldWF_Compost_A	MPA v1	18	22	13	20521	0.00087715
OldWF_Compost_B	MPA v1	16	11	10	19945	0.000802206
OldWF_Compost_C	MPA v1	0	0	0	21083	0
OldWF_Soil_A	MPA v1	0	0	0	23083	0
OldWF_Soil_B	MPA v1	0	0	0	22422	0		Idd Spectra	Dnct Pep	MeteProt	Spectra%
OldWF_Soil_C	MPA v1	0	0	0	22350	0	OldWFv1 Soil+Compost	5.66667	5.5	3.83333	0.000279893
OldWF_WWTP_A	MPA v1	0	0	0	23945	0
OldWF_WWTP_B	MPA v1	0	0	0	25509	0		Idd Spectra	Dnct Pep	MeteProt	Spectra%
OldWF_WWTP_C	MPA v1	73	42	36	27145	0.00268926	OldWFv1 WWTP	24.3333	14	12	0.00089642
NewWF_BGP_1_A	MPA v2	10547	4425	1649	33672	0.313228
NewWF_BGP_1_B	MPA v2	9664	4119	1561	33684	0.286902
NewWF_BGP_1_C	MPA v2	8433	3739	1444	33849	0.249136
NewWF_BGP_2_A	MPA v2	8496	3866	1421	33801	0.251354
NewWF_BGP_2_B	MPA v2	6808	3250	1298	33722	0.201886
NewWF_BGP_2_C	MPA v2	6273	3161	1189	30795	0.203702
NewWF_BGP_3_A	MPA v2	6755	3299	1295	33434	0.20204
NewWF_BGP_3_B	MPA v2	5708	2818	1046	33227	0.171788		Idd Spectra	Dnct Pep	MeteProt	Spectra%
NewWF_BGP_3_C	MPA v2	4732	2490	1004	32901	0.143825	NewWFv2 BGP	7490.67	3463	1323	0.224873
NewWF_Hgut_1_A	MPA v2	2946	1974	1069	31995	0.0920769
NewWF_Hgut_1_B	MPA v2	2530	1671	954	29989	0.0843643
NewWF_Hgut_1_C	MPA v2	2028	1383	745	32489	0.0624211
NewWF_Hgut_2_A	MPA v2	3775	2348	1184	33202	0.113698
NewWF_Hgut_2_B	MPA v2	2536	1687	918	30837	0.0822389
NewWF_Hgut_2_C	MPA v2	2730	1752	953	31171	0.0875814
NewWF_Hgut_3_A	MPA v2	3881	2032	948	32128	0.120798
NewWF_Hgut_3_B	MPA v2	3509	1900	818	32961	0.106459		Idd Spectra	Dnct Pep	MeteProt	Spectra%
NewWF_Hgut_3_C	MPA v2	2983	1752	854	31680	0.0941604	NewWFv2 Hgut	2990.89	1833.22	938.111	0.0937553
NewWF_Compost_A	MPA v2	197	169	114	28274	0.00696753
NewWF_Compost_B	MPA v2	186	175	111	27988	0.00664571
NewWF_Compost_C	MPA v2	102	102	64	28023	0.00363987
NewWF_Soil_A	MPA v2	76	72	43	24882	0.00305442
NewWF_Soil_B	MPA v2	104	94	64	25810	0.00402945		Idd Spectra	Dnct Pep	MeteProt	Spectra%
NewWF_Soil_C	MPA v2	69	65	44	24382	0.00282996	NewWFv2 Soil+Compost	122.333	112.833	73.3333	0.00452782
NewWF_WWTP_A	MPA v2	566	437	263	27951	0.0202497
NewWF_WWTP_B	MPA v2	368	289	201	28699	0.0128227		Idd Spectra	Dnct Pep	MeteProt	Spectra%
NewWF_WWTP_C	MPA v2	251	188	141	27319	0.00918774	NewWFv2 WWTP	395	304.667	201.667	0.0140867
OldWF_BGP_1_A	MPA v2	6403	3088	1233	24788	0.25831
OldWF_BGP_1_B	MPA v2	3685	2022	858	21250	0.173412
OldWF_BGP_1_C	MPA v2	3848	2087	907	21348	0.180251
OldWF_BGP_2_A	MPA v2	647	437	241	20984	0.030833
OldWF_BGP_2_B	MPA v2	1048	689	348	23809	0.044017
OldWF_BGP_2_C	MPA v2	800	562	293	21247	0.0376524
OldWF_BGP_3_A	MPA v2	1494	1006	488	23143	0.0645552
OldWF_BGP_3_B	MPA v2	1487	987	468	24184	0.0614869		Idd Spectra	Dnct Pep	MeteProt	Spectra%
OldWF_BGP_3_C	MPA v2	1290	856	425	23848	0.0540926	OldWFv2 BGP	2300.22	1303.78	584.556	0.100512
OldWF_Hgut_1_A	MPA v2	834	675	460	27973	0.0298145
OldWF_Hgut_1_B	MPA v2	431	359	254	27741	0.0155366
OldWF_Hgut_1_C	MPA v2	811	579	399	27523	0.0294663
OldWF_Hgut_2_A	MPA v2	815	616	392	28806	0.0282927
OldWF_Hgut_2_B	MPA v2	639	474	313	28060	0.0227726
OldWF_Hgut_2_C	MPA v2	417	345	222	28134	0.0148219
OldWF_Hgut_3_A	MPA v2	2181	1301	628	31168	0.0699756
OldWF_Hgut_3_B	MPA v2	1071	731	419	28891	0.0370704		Idd Spectra	Dnct Pep	MeteProt	Spectra%
OldWF_Hgut_3_C	MPA v2	836	585	362	28843	0.0289845	OldWFv2 Hgut	892.778	629.444	383.222	0.0307483
OldWF_Compost_A	MPA v2	25	30	18	20521	0.00121826
OldWF_Compost_B	MPA v2	69	56	32	19945	0.00345951
OldWF_Compost_C	MPA v2	5	9	6	21083	0.000237158
OldWF_Soil_A	MPA v2	13	15	10	23083	0.000563185
OldWF_Soil_B	MPA v2	11	11	8	22422	0.00049059		Idd Spectra	Dnct Pep	MeteProt	Spectra%
OldWF_Soil_C	MPA v2	7	7	5	22350	0.000313199	OldWFv2 Soil+Compost	21.6667	21.3333	13.1667	0.00104698
OldWF_WWTP_A	MPA v2	154	94	56	23945	0.00643141
OldWF_WWTP_B	MPA v2	105	83	54	25509	0.00411619		Idd Spectra	Dnct Pep	MeteProt	Spectra%
OldWF_WWTP_C	MPA v2	216	151	106	27145	0.00795727	OldWFv2 WWTP	158.333	109.333	72	0.00616829

## Sheet: Table Averages
Sample	Spectra	Peptides	Metaproteins	%Spectra
NewWFv1 BGP	7323.22	3311.33	1277	0.219854
NewWFv1 Hgut	2816.22	1635.11	873.111	0.0882695
NewWFv1 Soil+Compost	94.8333	80.3333	56.1667	0.00348575
NewWFv1 WWTP	275.333	200	144	0.00982074
OldWFv1 BGP	2206.56	1229.78	564.889	0.0963609
OldWFv1 Hgut	756.556	490.333	317.111	0.0259851
OldWFv1 Soil+Compost	5.66667	5.5	3.83333	0.000279893
OldWFv1 WWTP	24.3333	14	12	0.00089642
NewWFv2 BGP	7490.67	3463	1323	0.224873
NewWFv2 Hgut	2990.89	1833.22	938.111	0.0937553
NewWFv2 Soil+Compost	122.333	112.833	73.3333	0.00452782
NewWFv2 WWTP	395	304.667	201.667	0.0140867
OldWFv2 BGP	2300.22	1303.78	584.556	0.100512
OldWFv2 Hgut	892.778	629.444	383.222	0.0307483
OldWFv2 Soil+Compost	21.6667	21.3333	13.1667	0.00104698
OldWFv2 WWTP	158.333	109.333	72	0.00616829

## Sheet: Figure All samples New vs. Old
Sample	Version	Idd Spectra	Dnct Pep	MeteProt	Spectra%		Idd Spectra
OldWF_BGP_1_A	MPA v1	6265	2969	1205	0.252743		#Datapoint	OldWFv1 BGP	NewWFv2 BGP	OldWFv1 Hgut	NewWFv2 Hgut	OldWFv1 Soil+Compost	NewWFv2 Soil+Compost	OldWFv1 WWTP	NewWFv2 WWTP
OldWF_BGP_1_B	MPA v1	3554	1916	837	0.167247		1	6265	10547	731	2946	18	197	0	566
OldWF_BGP_1_C	MPA v1	3740	1984	880	0.175192		2	3554	9664	211	2530	16	186	0	368
OldWF_BGP_2_A	MPA v1	541	358	219	0.0257815		3	3740	8433	675	2028	0	102	73	251
OldWF_BGP_2_B	MPA v1	1007	660	337	0.0422949		4	541	8496	632	3775	0	76
OldWF_BGP_2_C	MPA v1	734	518	285	0.0345461		5	1007	6808	566	2536	0	104
OldWF_BGP_3_A	MPA v1	1398	931	458	0.060407		6	734	6273	270	2730	0	69
OldWF_BGP_3_B	MPA v1	1419	938	458	0.0586752		7	1398	6755	1996	3881
OldWF_BGP_3_C	MPA v1	1201	794	405	0.0503606		8	1419	5708	965	3509
OldWF_Hgut_1_A	MPA v1	731	545	397	0.0261323		9	1201	4732	763	2983
OldWF_Hgut_1_B	MPA v1	211	158	122	0.00760607		Average	2206.56	7490.67	756.556	2990.89	5.66667	122.333	24.3333	395
OldWF_Hgut_1_C	MPA v1	675	444	329	0.0245249
OldWF_Hgut_2_A	MPA v1	632	442	312	0.0219399		Dnct Pep
OldWF_Hgut_2_B	MPA v1	566	386	266	0.0201711		#Datapoint	OldWFv1 BGP	NewWFv2 BGP	OldWFv1 Hgut	NewWFv2 Hgut	OldWFv1 Soil+Compost	NewWFv2 Soil+Compost	OldWFv1 WWTP	NewWFv2 WWTP
OldWF_Hgut_2_C	MPA v1	270	210	153	0.00959693		1	2969	4425	545	1974	22	169	0	437
OldWF_Hgut_3_A	MPA v1	1996	1125	580	0.06404		2	1916	4119	158	1671	11	175	0	289
OldWF_Hgut_3_B	MPA v1	965	609	377	0.0334014		3	1984	3739	444	1383	0	102	42	188
OldWF_Hgut_3_C	MPA v1	763	494	318	0.0264536		4	358	3866	442	2348	0	72
OldWF_Compost_A	MPA v1	18	22	13	0.00087715		5	660	3250	386	1687	0	94
OldWF_Compost_B	MPA v1	16	11	10	0.000802206		6	518	3161	210	1752	0	65
OldWF_Compost_C	MPA v1	0	0	0	0		7	931	3299	1125	2032
OldWF_Soil_A	MPA v1	0	0	0	0		8	938	2818	609	1900
OldWF_Soil_B	MPA v1	0	0	0	0		9	794	2490	494	1752
OldWF_Soil_C	MPA v1	0	0	0	0		Average	1229.78	3463	490.333	1833.22	5.5	112.833	14	304.667
OldWF_WWTP_A	MPA v1	0	0	0	0
OldWF_WWTP_B	MPA v1	0	0	0	0		MetaProt
OldWF_WWTP_C	MPA v1	73	42	36	0.00268926		#Datapoint	OldWFv1 BGP	NewWFv2 BGP	OldWFv1 Hgut	NewWFv2 Hgut	OldWFv1 Soil+Compost	NewWFv2 Soil+Compost	OldWFv1 WWTP	NewWFv2 WWTP
NewWF_BGP_1_A	MPA v2	10547	4425	1649	0.313228		1	1205	1649	397	1069	13	114	0	263
NewWF_BGP_1_B	MPA v2	9664	4119	1561	0.286902		2	837	1561	122	954	10	111	0	201
NewWF_BGP_1_C	MPA v2	8433	3739	1444	0.249136		3	880	1444	329	745	0	64	36	141
NewWF_BGP_2_A	MPA v2	8496	3866	1421	0.251354		4	219	1421	312	1184	0	43
NewWF_BGP_2_B	MPA v2	6808	3250	1298	0.201886		5	337	1298	266	918	0	64
NewWF_BGP_2_C	MPA v2	6273	3161	1189	0.203702		6	285	1189	153	953	0	44
NewWF_BGP_3_A	MPA v2	6755	3299	1295	0.20204		7	458	1295	580	948
NewWF_BGP_3_B	MPA v2	5708	2818	1046	0.171788		8	458	1046	377	818
NewWF_BGP_3_C	MPA v2	4732	2490	1004	0.143825		9	405	1004	318	854
NewWF_Hgut_1_A	MPA v2	2946	1974	1069	0.0920769		Average	564.889	1323	317.111	938.111	3.83333	73.3333	12	201.667
NewWF_Hgut_1_B	MPA v2	2530	1671	954	0.0843643
NewWF_Hgut_1_C	MPA v2	2028	1383	745	0.0624211		Spectra%
NewWF_Hgut_2_A	MPA v2	3775	2348	1184	0.113698		#Datapoint	OldWFv1 BGP	NewWFv2 BGP	OldWFv1 Hgut	NewWFv2 Hgut	OldWFv1 Soil+Compost	NewWFv2 Soil+Compost	OldWFv1 WWTP	NewWFv2 WWTP
NewWF_Hgut_2_B	MPA v2	2536	1687	918	0.0822389		1	0.252743	0.313228	0.0261323	0.0920769	0.00087715	0.00696753	0	0.0202497
NewWF_Hgut_2_C	MPA v2	2730	1752	953	0.0875814		2	0.167247	0.286902	0.00760607	0.0843643	0.000802206	0.00664571	0	0.0128227
NewWF_Hgut_3_A	MPA v2	3881	2032	948	0.120798		3	0.175192	0.249136	0.0245249	0.0624211	0	0.00363987	0.00268926	0.00918774
NewWF_Hgut_3_B	MPA v2	3509	1900	818	0.106459		4	0.0257815	0.251354	0.0219399	0.113698	0	0.00305442
NewWF_Hgut_3_C	MPA v2	2983	1752	854	0.0941604		5	0.0422949	0.201886	0.0201711	0.0822389	0	0.00402945
NewWF_Compost_A	MPA v2	197	169	114	0.00696753		6	0.0345461	0.203702	0.00959693	0.0875814	0	0.00282996
NewWF_Compost_B	MPA v2	186	175	111	0.00664571		7	0.060407	0.20204	0.06404	0.120798
NewWF_Compost_C	MPA v2	102	102	64	0.00363987		8	0.0586752	0.171788	0.0334014	0.106459
NewWF_Soil_A	MPA v2	76	72	43	0.00305442		9	0.0503606	0.143825	0.0264536	0.0941604
NewWF_Soil_B	MPA v2	104	94	64	0.00402945		Average	0.0963609	0.224873	0.0259851	0.0937553	0.000279893	0.00452782	0.00089642	0.0140867
NewWF_Soil_C	MPA v2	69	65	44	0.00282996
NewWF_WWTP_A	MPA v2	566	437	263	0.0202497
NewWF_WWTP_B	MPA v2	368	289	201	0.0128227
NewWF_WWTP_C	MPA v2	251	188	141	0.00918774

## Sheet: Figures Average New vs. Old
Sample	Spectra	Peptides	Metaproteins	%Spectra
OldWFv1 BGP	2206.56	1229.78	564.889	0.0963609
OldWFv1 Hgut	756.556	490.333	317.111	0.0259851
OldWFv1 Soil+Compost	5.66667	5.5	3.83333	0.000279893
OldWFv1 WWTP	24.3333	14	12	0.00089642
NewWFv2 BGP	7490.67	3463	1323	0.224873
NewWFv2 Hgut	2990.89	1833.22	938.111	0.0937553
NewWFv2 Soil+Compost	122.333	112.833	73.3333	0.00452782
NewWFv2 WWTP	395	304.667	201.667	0.0140867
Spectra	OldWF	NewWF
BGP	2206.56	7490.67
Hgut	756.556	2990.89
Soil+Compost	5.66667	122.333
WWTP	24.3333	395
Peptides	OldWF	NewWF
BGP	1229.78	3463
Hgut	490.333	1833.22
Soil+Compost	5.5	112.833
WWTP	14	304.667
Metaproteins	OldWF	NewWF
BGP	564.889	1323
Hgut	317.111	938.111
Soil+Compost	3.83333	73.3333
WWTP	12	201.667
%Spectra	OldWF	NewWF
BGP	0.0963609	0.224873
Hgut	0.0259851	0.0937553
Soil+Compost	0.000279893	0.00452782
WWTP	0.00089642	0.0140867

## Sheet: Figures MPAv2 New Lab vs. Old 
Sample	Version	Idd Spectra	Dnct Pep	MeteProt	Spectra%	Tot Sp				Idd Spectra																These two charts are used as figure in the mansucript, further annotation was added using MS Powerpoint
OldWF_BGP_1_A	MPA v2	6403	3088	1233	0.25831	24788	0.25831			#Datapoint	OldWFv2 BGP	NewWFv2 BGP	OldWFv2 Hgut	NewWFv2 Hgut	OldWFv2 Soil+Compost	NewWFv2 Soil+Compost	OldWFv2 WWTP	NewWFv2 WWTP
OldWF_BGP_1_B	MPA v2	3685	2022	858	0.173412	21250	0.173412			1	6403	10547	834	2946	25	197	154	566
OldWF_BGP_1_C	MPA v2	3848	2087	907	0.180251	21348	0.180251			2	3685	9664	431	2530	69	186	105	368
OldWF_BGP_2_A	MPA v2	647	437	241	0.030833	20984	0.030833			3	3848	8433	811	2028	5	102	216	251
OldWF_BGP_2_B	MPA v2	1048	689	348	0.044017	23809	0.044017			4	647	8496	815	3775	13	76
OldWF_BGP_2_C	MPA v2	800	562	293	0.0376524	21247	0.0376524			5	1048	6808	639	2536	11	104
OldWF_BGP_3_A	MPA v2	1494	1006	488	0.0645552	23143	0.0645552			6	800	6273	417	2730	7	69
OldWF_BGP_3_B	MPA v2	1487	987	468	0.0614869	24184	0.0614869			7	1494	6755	2181	3881
OldWF_BGP_3_C	MPA v2	1290	856	425	0.0540926	23848	0.0540926			8	1487	5708	1071	3509
OldWF_Hgut_1_A	MPA v2	834	675	460	0.0298145	27973	0.0298145			9	1290	4732	836	2983
OldWF_Hgut_1_B	MPA v2	431	359	254	0.0155366	27741	0.0155366			Average	2300.22	7490.67	892.778	2990.89	21.6667	122.333	158.333	395
OldWF_Hgut_1_C	MPA v2	811	579	399	0.0294663	27523	0.0294663			TTEST OLD vs. NEW	3.15874e-05		1.03163e-06		0.00495031		0.111176
OldWF_Hgut_2_A	MPA v2	815	616	392	0.0282927	28806	0.0282927
OldWF_Hgut_2_B	MPA v2	639	474	313	0.0227726	28060	0.0227726
OldWF_Hgut_2_C	MPA v2	417	345	222	0.0148219	28134	0.0148219			Dnct Pep
OldWF_Hgut_3_A	MPA v2	2181	1301	628	0.0699756	31168	0.0699756			#Datapoint	OldWFv2 BGP	NewWFv2 BGP	OldWFv2 Hgut	NewWFv2 Hgut	OldWFv2 Soil+Compost	NewWFv2 Soil+Compost	OldWFv2 WWTP	NewWFv2 WWTP
OldWF_Hgut_3_B	MPA v2	1071	731	419	0.0370704	28891	0.0370704			1	3088	4425	675	1974	30	169	94	437
OldWF_Hgut_3_C	MPA v2	836	585	362	0.0289845	28843	0.0289845			2	2022	4119	359	1671	56	175	83	289
OldWF_Compost_A	MPA v2	25	30	18	0.00121826	20521	0.00121826			3	2087	3739	579	1383	9	102	151	188
OldWF_Compost_B	MPA v2	69	56	32	0.00345951	19945	0.00345951			4	437	3866	616	2348	15	72
OldWF_Compost_C	MPA v2	5	9	6	0.000237158	21083	0.000237158			5	689	3250	474	1687	11	94
OldWF_Soil_A	MPA v2	13	15	10	0.000563185	23083	0.000563185			6	562	3161	345	1752	7	65
OldWF_Soil_B	MPA v2	11	11	8	0.00049059	22422	0.00049059			7	1006	3299	1301	2032
OldWF_Soil_C	MPA v2	7	7	5	0.000313199	22350	0.000313199			8	987	2818	731	1900
OldWF_WWTP_A	MPA v2	154	94	56	0.00643141	23945	0.00643141			9	856	2490	585	1752
OldWF_WWTP_B	MPA v2	105	83	54	0.00411619	25509	0.00411619			Average	1303.78	3463	629.444	1833.22	21.3333	112.833	109.333	304.667
OldWF_WWTP_C	MPA v2	216	151	106	0.00795727	27145	0.00795727
NewWF_BGP_1_A	MPA v2	10547	4425	1649	0.313228	33672	0.313228			MetaProt
NewWF_BGP_1_B	MPA v2	9664	4119	1561	0.286902	33684	0.286902			#Datapoint	OldWFv2 BGP	NewWFv2 BGP	OldWFv2 Hgut	NewWFv2 Hgut	OldWFv2 Soil+Compost	NewWFv2 Soil+Compost	OldWFv2 WWTP	NewWFv2 WWTP
NewWF_BGP_1_C	MPA v2	8433	3739	1444	0.249136	33849	0.249136			1	1233	1649	460	1069	18	114	56	263
NewWF_BGP_2_A	MPA v2	8496	3866	1421	0.251354	33801	0.251354			2	858	1561	254	954	32	111	54	201
NewWF_BGP_2_B	MPA v2	6808	3250	1298	0.201886	33722	0.201886			3	907	1444	399	745	6	64	106	141
NewWF_BGP_2_C	MPA v2	6273	3161	1189	0.203702	30795	0.203702			4	241	1421	392	1184	10	43
NewWF_BGP_3_A	MPA v2	6755	3299	1295	0.20204	33434	0.20204			5	348	1298	313	918	8	64
NewWF_BGP_3_B	MPA v2	5708	2818	1046	0.171788	33227	0.171788			6	293	1189	222	953	5	44
NewWF_BGP_3_C	MPA v2	4732	2490	1004	0.143825	32901	0.143825			7	488	1295	628	948
NewWF_Hgut_1_A	MPA v2	2946	1974	1069	0.0920769	31995	0.0920769			8	468	1046	419	818
NewWF_Hgut_1_B	MPA v2	2530	1671	954	0.0843643	29989	0.0843643			9	425	1004	362	854
NewWF_Hgut_1_C	MPA v2	2028	1383	745	0.0624211	32489	0.0624211			Average	584.556	1323	383.222	938.111	13.1667	73.3333	72	201.667
NewWF_Hgut_2_A	MPA v2	3775	2348	1184	0.113698	33202	0.113698
NewWF_Hgut_2_B	MPA v2	2536	1687	918	0.0822389	30837	0.0822389			Spectra%
NewWF_Hgut_2_C	MPA v2	2730	1752	953	0.0875814	31171	0.0875814			#Datapoint	OldWFv2 BGP	NewWFv2 BGP	OldWFv2 Hgut	NewWFv2 Hgut	OldWFv2 Soil+Compost	NewWFv2 Soil+Compost	OldWFv2 WWTP	NewWFv2 WWTP
NewWF_Hgut_3_A	MPA v2	3881	2032	948	0.120798	32128	0.120798			1	0.25831	0.313228	0.0298145	0.0920769	0.00121826	0.00696753	0.00643141	0.0202497
NewWF_Hgut_3_B	MPA v2	3509	1900	818	0.106459	32961	0.106459			2	0.173412	0.286902	0.0155366	0.0843643	0.00345951	0.00664571	0.00411619	0.0128227
NewWF_Hgut_3_C	MPA v2	2983	1752	854	0.0941604	31680	0.0941604			3	0.180251	0.249136	0.0294663	0.0624211	0.000237158	0.00363987	0.00795727	0.00918774
NewWF_Compost_A	MPA v2	197	169	114	0.00696753	28274	0.00696753			4	0.030833	0.251354	0.0282927	0.113698	0.000563185	0.00305442
NewWF_Compost_B	MPA v2	186	175	111	0.00664571	27988	0.00664571			5	0.044017	0.201886	0.0227726	0.0822389	0.00049059	0.00402945
NewWF_Compost_C	MPA v2	102	102	64	0.00363987	28023	0.00363987			6	0.0376524	0.203702	0.0148219	0.0875814	0.000313199	0.00282996
NewWF_Soil_A	MPA v2	76	72	43	0.00305442	24882	0.00305442			7	0.0645552	0.20204	0.0699756	0.120798
NewWF_Soil_B	MPA v2	104	94	64	0.00402945	25810	0.00402945			8	0.0614869	0.171788	0.0370704	0.106459
NewWF_Soil_C	MPA v2	69	65	44	0.00282996	24382	0.00282996			9	0.0540926	0.143825	0.0289845	0.0941604
NewWF_WWTP_A	MPA v2	566	437	263	0.0202497	27951	0.0202497			Average	0.100512	0.224873	0.0307483	0.0937553	0.00104698	0.00452782	0.00616829	0.0140867
NewWF_WWTP_B	MPA v2	368	289	201	0.0128227	28699	0.0128227
NewWF_WWTP_C	MPA v2	251	188	141	0.00918774	27319	0.00918774
										Measured Spectra
										#Datapoint	OldWFv2 BGP	NewWFv2 BGP	OldWFv2 Hgut	NewWFv2 Hgut	OldWFv2 Soil+Compost	NewWFv2 Soil+Compost	OldWFv2 WWTP	NewWFv2 WWTP
										1	24788	33672	27973	31995	20521	28274	23945	27951
										2	21250	33684	27741	29989	19945	27988	25509	28699
										3	21348	33849	27523	32489	21083	28023	27145	27319
										4	20984	33801	28806	33202	23083	24882
										5	23809	33722	28060	30837	22422	25810
										6	21247	30795	28134	31171	22350	24382
										7	23143	33434	31168	32128
										8	24184	33227	28891	32961
										9	23848	32901	28843	31680
										Average	22733.4	33231.7	28571	31828	21567.3	26559.8	25533	27989.7
										TTEST OLD vs. NEW	9.93576e-11		7.53475e-06		0.000287028		0.101161

## Sheet: Acidifcation experimental Data
Sample	Count protein identifications (Mascot FDR 1%)		This figure shows the number of identified Mascot protein groups for acidified and lyophilized samples. For lyophilization, 30 µl peptide extracts were dried in a SpeedVac and dissolved in 33 µl loading buffer A. For acidification, 30 µl of peptide extracts from the same sample were acidified with 3 µl of 0.5% TFA solution (1:200 dilution). Both samples contained 33 µl of which 5 µl were injected…
Hgut_1_A_lyophilized	608
Hgut_1_A_acidified	636
Hgut_1_B_lyophilized	630
Hgut_1_B_acidified	736
BGP_1_A_lyophilized	789
BGP_1_A_acidified	879
