# Supplementary material for: A Robust and Universal Metaproteomics Workflow for Research Studies and Routine Diagnostics Within 24 h Using Phenol Extraction, FASP Digest, and the MetaProteomeAnalyzer
Source: Front Microbiol. 2019 Aug 16;10:1883. doi: 10.3389/fmicb.2019.01883 (PMC6707425; doi:10.3389/fmicb.2019.01883)
Supplement: TABLE S13 — Metaprotein annotations. [file Table_13.XLSX]

## Sheet: DESCRIPTION
General description
This file contains the calculation to determine which meta-proteins are annotated and the calculation of the spectra associated with them
Overview table sheets
Table	Content
COPY Raw MP MPAv1	Contains a list of all metaproteins and data, a copy of the data from Supplementary Table 5, Exported using MPAv1
COPY Raw MP MPAv2	Contains a list of all metaproteins and data, a copy of the data from Supplementary Table 5, Exported using MPAv2
Count MP MPAv1	Contains the calculation for MPAv1
Count MP MPAv2	Contains the calculation for MPAv2
Summary Table	Summary of the findings for 54 samples
Table sheet description/legend
Count MP MPAv1+Count MP MPAv2
The rows contain metaproteins
Column	Description
Name	Which of the 54 samples
Last Value of Sample	Checks if still the same sample (1=last metaprotein of sample, 0=more metaproetins for this sample), used for cumulative sum
Metagenome unknown	Checks if this metaprotein is an unnanotated metagenome entry (all descriptions are standardized to "Metagenome Unknown")
Protein Known	Opposite of Column "Metagenome Unknown"
CountSpectra Known	Cumulative sum of metaprotein spectra where "Protein Known"=1
CountSpectra Unknown	Cumulative sum of metaprotein spectra where "Metagenome Unknown"=1
Meta-Protein Description	The metaprotein description also indicates if the protein has further annotation
Meta-Protein Taxonomy	Taxonomy of the metaprotein
Peptide Count	Non redundant count of distinct peptides
Spectral Count	Non redundant count of spectra for this metaprotein
Only for table sheet "Count MP MPAv2"
Column	Description
BLAST_	Checks if this metaprotein is ananotated via BLAST (entry contains "BLAST_", this is done by the MPA to distinguish from other proteins)
Count MPs BLAST	Cumulative count of metaproteins with BLAST annotation
Summary Table
Summary table for this analysis. Cumulative spectral counts for each sample as calculated in table sheets "Count MP MPAv1" and Count MP MPAv2" are collected and appropriatly put into a summary table
Column	Description
Name MPAv1	Which of the 54 samples, analysis with MPAv1
CountSpectra Known MPAv1	Spectral count for metaproteins with annotation either from UniProt entry or BLAST (last value for sample in column "CountSpectra Known")
CountSpectra Unknown MPAv1	Spectral count for metaproteins without annotation, a metageonme entry that did not produce a BLAST hit (last value for sample in column "CountSpectra Unkwnown")
Name MPAv2	Which of the 54 samples, analysis with MPAv2
CountSpectra Known MPAv2	Spectral count for metaproteins with annotation either from UniProt entry or BLAST (last value for sample in column "CountSpectra Known")
CountSpectra Unknown MPAv2	Spectral count for metaproteins without annotation, a metageonme entry that did not produce a BLAST hit (last value for sample in column "CountSpectra Unkwnown")
Count MPs BLAST MPAv2	Spectral count for metaproteins with annotation obtained from BLAST (last value for sample in column "Count MPs BLAST")

## Sheet: COPY Raw MP MPAv1
Content	Name	Custom.Meta-Protein No.	Custom.Meta-Protein Accession	Custom.Meta-Protein Description	Custom.Meta-Protein Taxonomy	Custom.Peptide Count	Custom.Spectral Count	Custom.Proteins	Custom.Peptides	Custom.	Custom.filename
	MP_MPAv1_NewWF_BGP_1_A.csv	1	Meta-Protein 698	Metagenome unknown	root	1	1	contig1688000045_2	EPAGGKEENAPNNNLK		MP_MPAv1_NewWF_BGP_1_A.csv
	MP_MPAv1_NewWF_BGP_1_A.csv	2	Meta-Protein 699	Metagenome unknown	root	1	1	contig139276000069_8	LLAAALSHHKEDPVR		MP_MPAv1_NewWF_BGP_1_A.csv
	MP_MPAv1_NewWF_BGP_1_A.csv	3	Meta-Protein 700	Metagenome unknown	root	8	21	contig5028000013_55	AFADGNIGDISLGLAFAR, ASAPVVQDMVWLR, ATDKLVLKPAASYAHEGK, IGLSDTLLTLTVQK, LTVVKDGDNANEFSLSANYR, MEVPVMDLATLTVDFDQK, VTYADAALQAIASAKYQLSLYDQYFK		MP_MPAv1_NewWF_BGP_1_A.csv
	MP_MPAv1_NewWF_BGP_1_A.csv	4	Meta-Protein 701	Metagenome unknown	root	1	3	contig297000063_8	AGSSHVIHLHGELMNAR		MP_MPAv1_NewWF_BGP_1_A.csv
	MP_MPAv1_NewWF_BGP_1_A.csv	5	Meta-Protein 702	Metagenome unknown	root	1	1	contig145000010_3	GKPIRDPVSEGGGIHLK		MP_MPAv1_NewWF_BGP_1_A.csv
	MP_MPAv1_NewWF_BGP_1_A.csv	6	Meta-Protein 1	Metagenome unknown	root	3	5	contig138794000051_8, contig32_266, contig139732000078_38	GKLHVFHSETEVGPVTK, LHVFHSETEVGPVTKVGGNYAASLHSHMDAVK		MP_MPAv1_NewWF_BGP_1_A.csv
	MP_MPAv1_NewWF_BGP_1_A.csv	7	Meta-Protein 703	Metagenome unknown	root	1	2	contig3163000068_3	GAGSHHYTTLASERDTLIK		MP_MPAv1_NewWF_BGP_1_A.csv
	MP_MPAv1_NewWF_BGP_1_A.csv	8	Meta-Protein 704	Metagenome unknown	root	1	3	contig22589000074_1	LVEQGATHEVYHNPVHPYTR		MP_MPAv1_NewWF_BGP_1_A.csv
	MP_MPAv1_NewWF_BGP_1_A.csv	9	Meta-Protein 705	Metagenome unknown	root	1	1	contig101000017_9	LIGGPMDYTPGIFEMDIEK		MP_MPAv1_NewWF_BGP_1_A.csv
	MP_MPAv1_NewWF_BGP_1_A.csv	10	Meta-Protein 706	Metagenome unknown	root	1	1	contig139208000022_3	LHSTATALALGEKPTGNAR		MP_MPAv1_NewWF_BGP_1_A.csv
	MP_MPAv1_NewWF_BGP_1_A.csv	11	Meta-Protein 707	Metagenome unknown	root	1	3	contig882000042_152	RPQIHPVAAEIVK		MP_MPAv1_NewWF_BGP_1_A.csv
	MP_MPAv1_NewWF_BGP_1_A.csv	12	Meta-Protein 708	Metagenome unknown	root	1	1	contig899000014_8	IIRPHVQEVMEGQK		MP_MPAv1_NewWF_BGP_1_A.csv
	MP_MPAv1_NewWF_BGP_1_A.csv	13	Meta-Protein 2	Metagenome unknown	root	2	5	contig9350000029_2, contig4503000063_1	DGSAVVVPSGANHNVLNTSKHVVKDGSAVVVPSGANHNVLNTSK		MP_MPAv1_NewWF_BGP_1_A.csv
	MP_MPAv1_NewWF_BGP_1_A.csv	14	Meta-Protein 709	Metagenome unknown	root	1	1	contig139278000056_5	HTNPCGIGSGQTLAEAYKK		MP_MPAv1_NewWF_BGP_1_A.csv
	MP_MPAv1_NewWF_BGP_1_A.csv	15	Meta-Protein 710	Metagenome unknown	root	1	2	contig139628000068_113	EHVKPVLFVNKVDR		MP_MPAv1_NewWF_BGP_1_A.csv
	MP_MPAv1_NewWF_BGP_1_A.csv	16	Meta-Protein 711	Metagenome unknown	root	1	1	contig139340000007_8	AVLQIAHGMAEHSAR		MP_MPAv1_NewWF_BGP_1_A.csv
	MP_MPAv1_NewWF_BGP_1_A.csv	17	Meta-Protein 712	Metagenome unknown	root	1	1	contig6038000028_1	AGKPAEEIIQHVQR		MP_MPAv1_NewWF_BGP_1_A.csv
	MP_MPAv1_NewWF_BGP_1_A.csv	18	Meta-Protein 713	Metagenome unknown	root	3	5	contig9020000014_1	AHQAIQDAMQQNSYLQR, AVALDKDTFTTIAAARIQHHASQIDNYLEQR		MP_MPAv1_NewWF_BGP_1_A.csv
	MP_MPAv1_NewWF_BGP_1_A.csv	19	Meta-Protein 714	Metagenome unknown	root	1	1	contig139484000014_4	KTTVITADQHYGAHLYDESK		MP_MPAv1_NewWF_BGP_1_A.csv
	MP_MPAv1_NewWF_BGP_1_A.csv	20	Meta-Protein 715	Metagenome unknown	root	1	1	contig7189000028_1	LAYVNSGITSSNVPEGVDANGEVT		MP_MPAv1_NewWF_BGP_1_A.csv
	MP_MPAv1_NewWF_BGP_1_A.csv	21	Meta-Protein 716	Metagenome unknown	root	1	1	contig138789000028_6	TVLGVLKNDNHVSR		MP_MPAv1_NewWF_BGP_1_A.csv
	MP_MPAv1_NewWF_BGP_1_A.csv	22	Meta-Protein 717	Metagenome unknown	root	2	4	contig139179000058_2	DLLSEYDFPGDELPVIQGSALKGITINTSHVEYETAKR		MP_MPAv1_NewWF_BGP_1_A.csv
	MP_MPAv1_NewWF_BGP_1_A.csv	23	Meta-Protein 718	Metagenome unknown	root	1	2	contig32829000043_2	MIVNHVEVIKPK		MP_MPAv1_NewWF_BGP_1_A.csv
	MP_MPAv1_NewWF_BGP_1_A.csv	24	Meta-Protein 719	Metagenome unknown	root	1	1	contig496000064_32	VSIDGDTSTNDMAIIMASGEAK		MP_MPAv1_NewWF_BGP_1_A.csv
	MP_MPAv1_NewWF_BGP_1_A.csv	25	Meta-Protein 720	Metagenome unknown	root	1	1	contig5561000053_8	VNHQVGTHNLANQGEGSTSNIMYTR		MP_MPAv1_NewWF_BGP_1_A.csv
	MP_MPAv1_NewWF_BGP_1_A.csv	26	Meta-Protein 721	Metagenome unknown	root	1	1	contig241000053_43	HATRYEMVELTAR		MP_MPAv1_NewWF_BGP_1_A.csv
	MP_MPAv1_NewWF_BGP_1_A.csv	27	Meta-Protein 722	VPC26_MYCTU Ribonuclease VapC26 OS=Mycobacterium tuberculosis (strain ATCC 25618 / H37Rv) GN=vapC26 PE=1 SV=1	Mycobacterium tuberculosis H37Rv	1	1	O53779	ELAGGAWELANCGAAEIEQAARIVTK		MP_MPAv1_NewWF_BGP_1_A.csv
	MP_MPAv1_NewWF_BGP_1_A.csv	28	Meta-Protein 723	Metagenome unknown	root	1	3	contig629000071_2	GQPKPAAAEPAVVQEVQKGEER		MP_MPAv1_NewWF_BGP_1_A.csv
	MP_MPAv1_NewWF_BGP_1_A.csv	29	Meta-Protein 724	Metagenome unknown	root	1	1	contig138801000055_15	TPHEAVGIPTKEANAAGIR		MP_MPAv1_NewWF_BGP_1_A.csv
	MP_MPAv1_NewWF_BGP_1_A.csv	30	Meta-Protein 3	Metagenome unknown	root	1	4	contig662000042_94, contig33416000024_2	IGYQPSTHQVAHMTAMEK		MP_MPAv1_NewWF_BGP_1_A.csv
	MP_MPAv1_NewWF_BGP_1_A.csv	31	Meta-Protein 725	Metagenome unknown	root	1	1	contig139218000074_39	HSVNNMEDLEKIR		MP_MPAv1_NewWF_BGP_1_A.csv
	MP_MPAv1_NewWF_BGP_1_A.csv	32	Meta-Protein 726	Metagenome unknown	root	1	1	contig13532000008_1	SVLHFTVSPEHQR		MP_MPAv1_NewWF_BGP_1_A.csv
	MP_MPAv1_NewWF_BGP_1_A.csv	33	Meta-Protein 727	Metagenome unknown	root	2	3	contig139596000067_35	GIELDPATEVLSLIGSKTHQYPSYAGMENFRK		MP_MPAv1_NewWF_BGP_1_A.csv
	MP_MPAv1_NewWF_BGP_1_A.csv	34	Meta-Protein 728	Metagenome unknown	root	14	43	contig139679000026_2	ALFYNVDMFK, ALFYNVDMFKK, AMQWYVDLVR, ASFSGGSNLVVLK, FLLEKDNMVEYTK, HLDAAADRVNDVLK, HLDAAADRVNDVLKR, NAFMNANYVSTTYK, NKSYGVPWFAETR, NLTHMLPAQVEVFADPYYDSGVWK, QEFVNVLSEYVDGTYNDNTVKK, SYGVPWFAETR, TTLEYSTAYPPLATWGDIENIVKVNVEIIGWDVAWQR		MP_MPAv1_NewWF_BGP_1_A.csv
	MP_MPAv1_NewWF_BGP_1_A.csv	35	Meta-Protein 729	MTTB_METTE Trimethylamine methyltransferase MttB (Fragment) OS=Methanosarcina thermophila GN=mttB PE=3 SV=4	Methanosarcina thermophila	1	2	Q9P995	NHQVKPIDADILK		MP_MPAv1_NewWF_BGP_1_A.csv
	MP_MPAv1_NewWF_BGP_1_A.csv	36	Meta-Protein 730	Metagenome unknown	root	1	1	contig138830000028_10	VKNEDMQHLVDATGGRPVR		MP_MPAv1_NewWF_BGP_1_A.csv
	MP_MPAv1_NewWF_BGP_1_A.csv	37	Meta-Protein 731	Metagenome unknown	root	5	10	contig139658000012_2	EGGFVTTETWTGTGR, GVVGVEYFFAPK, LGHTNLYDREFVTK, VTDVMHVNATNIVLGGDYLMYRYYLDDQVAIR		MP_MPAv1_NewWF_BGP_1_A.csv
	MP_MPAv1_NewWF_BGP_1_A.csv	38	Meta-Protein 732	Metagenome unknown	root	1	1	contig935000045_4	KPISGMEDLKGLK		MP_MPAv1_NewWF_BGP_1_A.csv
	MP_MPAv1_NewWF_BGP_1_A.csv	39	Meta-Protein 733	Metagenome unknown	root	1	1	contig138853000003_7	VGLLNVGHEPGKGNQLAK		MP_MPAv1_NewWF_BGP_1_A.csv
	MP_MPAv1_NewWF_BGP_1_A.csv	40	Meta-Protein 734	Metagenome unknown	root	1	1	contig139707000053_54	INQILHEHTGQPLDKIER		MP_MPAv1_NewWF_BGP_1_A.csv
	MP_MPAv1_NewWF_BGP_1_A.csv	41	Meta-Protein 735	Metagenome unknown	root	3	11	contig104468000041_2	FVANYSTGTALEDASGVTLTATHR, KADGTYEMYFHEGGAKMDNNVLAQIDALTK		MP_MPAv1_NewWF_BGP_1_A.csv
	MP_MPAv1_NewWF_BGP_1_A.csv	42	Meta-Protein 736	Metagenome unknown	root	1	1	contig50293000055_5	MREAVIVSAVR		MP_MPAv1_NewWF_BGP_1_A.csv
	MP_MPAv1_NewWF_BGP_1_A.csv	43	Meta-Protein 737	Metagenome unknown	root	2	2	contig824000062_2	AKFPGAQHVPFSEEKGIDREVVEAMHR		MP_MPAv1_NewWF_BGP_1_A.csv
	MP_MPAv1_NewWF_BGP_1_A.csv	44	Meta-Protein 738	Metagenome unknown	root	2	14	contig8244000033_3	HVPVIEAPDKVAADQPVEIKVSIGEEIPHPNTAEHHIR		MP_MPAv1_NewWF_BGP_1_A.csv
	MP_MPAv1_NewWF_BGP_1_A.csv	45	Meta-Protein 739	Metagenome unknown	root	7	9	contig153000030_3	FYIDGLGLAR, HEDAKPGPIAQTSPGTLVASK, IAVLPFDTEGNVQAVR, LLELDDDALIEAVAK, LLELDDDALIEAVAKK, VEVAPGWNDVIYDLSGPMKYANYFNNAATATR		MP_MPAv1_NewWF_BGP_1_A.csv
	MP_MPAv1_NewWF_BGP_1_A.csv	46	Meta-Protein 740	Metagenome unknown	root	1	2	contig331000038_3	AHPGVTVKDEITADTDGNYQTK		MP_MPAv1_NewWF_BGP_1_A.csv
	MP_MPAv1_NewWF_BGP_1_A.csv	47	Meta-Protein 741	Metagenome unknown	root	2	3	contig704000026_2	EKYGVEFAGGQGIHAGRYGVEFAGGQGIHAGR		MP_MPAv1_NewWF_BGP_1_A.csv
	MP_MPAv1_NewWF_BGP_1_A.csv	48	Meta-Protein 742	ZEB2_MAIZE 16 kDa gamma-zein OS=Zea mays PE=1 SV=1	Zea mays	1	10	P08031	HQCSPAATPYGSPQCQALQQQCCHQIR		MP_MPAv1_NewWF_BGP_1_A.csv
	MP_MPAv1_NewWF_BGP_1_A.csv	49	Meta-Protein 743	Metagenome unknown	root	3	4	contig6150000022_3	HRPTVLGLPVR, SAVVLQVQDGEFKSLGIDAPFLGGDTFEAPEFIEIGGK		MP_MPAv1_NewWF_BGP_1_A.csv
	MP_MPAv1_NewWF_BGP_1_A.csv	50	Meta-Protein 744	Metagenome unknown	root	1	1	contig138306000031_19	AAWLKDNGKPYTVEAAR		MP_MPAv1_NewWF_BGP_1_A.csv
	MP_MPAv1_NewWF_BGP_1_A.csv	51	Meta-Protein 745	Metagenome unknown	root	1	1	contig94000050_3	QAVELINMEEHQGAHPR		MP_MPAv1_NewWF_BGP_1_A.csv
	MP_MPAv1_NewWF_BGP_1_A.csv	52	Meta-Protein 746	Metagenome unknown	root	6	9	contig42000075_13	AEAITMLDNVLENAK, DVPAGSWFYDYIR, ERTPATDFEGHWAR, ISDAVLDILGDGSYTSK, TPATDFEGHWARVAQAIGYISGYSANEFGPNDPITR		MP_MPAv1_NewWF_BGP_1_A.csv
	MP_MPAv1_NewWF_BGP_1_A.csv	53	Meta-Protein 747	Metagenome unknown	root	15	42	contig139509000048_5	ADPINDNYTGWVLLSLDK, ADPINDNYTGWVLLSLDKR, ASVVWEPVPGAEGYVVR, EYRPEEYGWTEGGHPLK, FSSTNYGDAAMLYDEETGR, GGEPVITMFEDDYYLFVSMQR, KASVVWEPVPGAEGYVVR, LYSYAGNSNDRVTVTDDPK, SFIQNPTTYCNPISLTQGSGR, TDYIELPTSVHAR, VETSSTLENYWPAFAVDEDAK, VEYGDYPQYLPGVK, VFGNPEEATFTK, VFGNPEEATFTKVENVTAVRYSDDLIFPYFDHR		MP_MPAv1_NewWF_BGP_1_A.csv
	MP_MPAv1_NewWF_BGP_1_A.csv	54	Meta-Protein 748	Metagenome unknown	root	2	3	contig1204000009_8	FDDQLGKDEAFAHAQKTALIDSAYAGFEDQILGR		MP_MPAv1_NewWF_BGP_1_A.csv
	MP_MPAv1_NewWF_BGP_1_A.csv	55	Meta-Protein 4	Metagenome unknown	root	3	6	contig139738000012_59, contig139849000004_50	SHVLVCGGTGCSSSNSALIR, SVLEGDPHSVLEAMAIAGYAIGATKVLTEMAPEEVIQLVK		MP_MPAv1_NewWF_BGP_1_A.csv
	MP_MPAv1_NewWF_BGP_1_A.csv	56	Meta-Protein 749	Metagenome unknown	root	6	21	contig526000052_1	AAGYDVVDLGR, AAGYDVVDLGRDVPVDEVVAAVEK, AIFEGEEDDVVEGLQK, DVPVDEVVAAVEK, IANFIKEHGDNIVKMIEIDPSSILVR		MP_MPAv1_NewWF_BGP_1_A.csv
	MP_MPAv1_NewWF_BGP_1_A.csv	57	Meta-Protein 750	Metagenome unknown	root	21	95	contig139045000003_41	AGFEVGPLSLDGAYSNTAK, DEDLAVVAYILTANK, DLVEEGEVADPTVLTHK, EAELTEEDVELIAQELIAQQVQK, ETKDEDLAVVAYILTANK, FDILPELDR, FYRETKDEDLAVVAYILTANK, GAALDLGYNAELK, GAALDLGYNAELKK, ITDGAFDPWK, ITDGAFDPWKVK, KVPTVKPEATAVGAGIYGDIGK, LIVDAFTEDIAELNER, LNYGADIAMDLGEEEDNTRFDLK, TTDGGLTYGASAAYER, VAALEAAQADVATKEEVAAVQADVDAVK, VAALEAAQADVATKEEVAAVQADVDAVKADVK, VFDLGALPITVDAR, VGTEKTTDGGLTYGASAAYER, VPTVKPEATAVGAGIYGD…		MP_MPAv1_NewWF_BGP_1_A.csv
	MP_MPAv1_NewWF_BGP_1_A.csv	58	Meta-Protein 751	Metagenome unknown	root	1	2	contig592000058_110	LVGAGVAKEDGSLSGASVGK		MP_MPAv1_NewWF_BGP_1_A.csv
	MP_MPAv1_NewWF_BGP_1_A.csv	59	Meta-Protein 752	Metagenome unknown	root	1	2	contig13346000033_2	LKAQQILADSEER		MP_MPAv1_NewWF_BGP_1_A.csv
	MP_MPAv1_NewWF_BGP_1_A.csv	60	Meta-Protein 753	Metagenome unknown	root	3	6	contig139021000050_21	FVGGNEQAVISPDSFK, KLAEVGEDHYDATFYKPHYNYLLQTR		MP_MPAv1_NewWF_BGP_1_A.csv
	MP_MPAv1_NewWF_BGP_1_A.csv	61	Meta-Protein 754	Metagenome unknown	root	2	5	contig139628000068_20	FMGVTQGSVLASELDKLLMQKPILEELEKK		MP_MPAv1_NewWF_BGP_1_A.csv
	MP_MPAv1_NewWF_BGP_1_A.csv	62	Meta-Protein 755	Metagenome unknown	root	2	3	contig139462000016_12	DRGIIVLTHESPDQRGYLWDPADAAYAMIAVAK		MP_MPAv1_NewWF_BGP_1_A.csv
	MP_MPAv1_NewWF_BGP_1_A.csv	63	Meta-Protein 756	Metagenome unknown	root	2	4	contig101000013_81	EVEGIFTMILSDSKSFKGQTIAEICPK		MP_MPAv1_NewWF_BGP_1_A.csv
	MP_MPAv1_NewWF_BGP_1_A.csv	64	Meta-Protein 757	Metagenome unknown	root	3	6	contig140125000023_2	SAQLEEGLGALVLR, SLNQQVSAHVSEYEAKVSTYTSLESGLSTLSTDLAAFK		MP_MPAv1_NewWF_BGP_1_A.csv
	MP_MPAv1_NewWF_BGP_1_A.csv	65	Meta-Protein 5	Metagenome unknown	root	21	47	contig19126000019_1, contig101000017_3, contig139681000053_1	ANIGNYVYNSVAAER, ASIGYTGQNGILK, ASLGYTGQDGILK, DLINMTSIPAGTNFR, DLNNQNIDVMAGYEWQR, GLTVNAQDMITGK, GVANFLSTINPNDIESFTVLK, IAGVLVTPNDGTPGGGSTIR, IAGVVVTPNDGTPGGGATIR, ISATVQNPFVITDYK, LGNENTDWQKEIYR, MINEDFLINNPTISDMK, MNVGPNGVWSPLGFFENK, MQFFPDLR, NGDHIINENDRYFYHK, NKVLQNIGSLK, SINKDAPHNPVALLK, SSTNHVGGGYDGYDIQDKWNR, SSTNHVGGGYDGYDVQDKWNR, TGFGQDHNVSVTGGLKYFGESITKPDYIYQAEEVEWATR		MP_MPAv1_NewWF_BGP_1_A.csv
	MP_MPAv1_NewWF_BGP_1_A.csv	66	Meta-Protein 758	Metagenome unknown	root	2	4	contig139907000046_41	STHYALEAEKIHAQMYTDAKYLLYSDVAEKEGFPNVAR		MP_MPAv1_NewWF_BGP_1_A.csv
	MP_MPAv1_NewWF_BGP_1_A.csv	67	Meta-Protein 759	Metagenome unknown	root	1	1	contig1068000023_37	LKPHVFYVDEGSQTVR		MP_MPAv1_NewWF_BGP_1_A.csv
	MP_MPAv1_NewWF_BGP_1_A.csv	68	Meta-Protein 6	Metagenome unknown	root	1	1	contig107691000050_4, contig137000053_9	IAEGGNSGVLYHVVEHPK		MP_MPAv1_NewWF_BGP_1_A.csv
	MP_MPAv1_NewWF_BGP_1_A.csv	69	Meta-Protein 760	Metagenome unknown	root	1	1	contig2279000069_17	FTNAHGISGFEHDIR		MP_MPAv1_NewWF_BGP_1_A.csv
	MP_MPAv1_NewWF_BGP_1_A.csv	70	Meta-Protein 761	Metagenome unknown	root	1	1	contig4882000078_5	TAVENLGLTVGKK		MP_MPAv1_NewWF_BGP_1_A.csv
	MP_MPAv1_NewWF_BGP_1_A.csv	71	Meta-Protein 762	Metagenome unknown	root	1	1	contig64163000047_1	LLKDVNMATAAADR		MP_MPAv1_NewWF_BGP_1_A.csv
	MP_MPAv1_NewWF_BGP_1_A.csv	72	Meta-Protein 763	Metagenome unknown	root	5	10	contig49000026_1	DAFVEATQQFMGIK, EAQIGYSNVTGNLPTTK, SEIYGMPWFTETR, SVFKEQMQFAKVWDNAMEIGGAYSFETTK		MP_MPAv1_NewWF_BGP_1_A.csv
	MP_MPAv1_NewWF_BGP_1_A.csv	73	Meta-Protein 764	Metagenome unknown	root	2	3	contig139615000068_17	NYELWMEGSRYVSSALTLNDVKK		MP_MPAv1_NewWF_BGP_1_A.csv
	MP_MPAv1_NewWF_BGP_1_A.csv	74	Meta-Protein 7	Metagenome unknown	root	1	4	ATB_S_contig176822, contig1353000076_1	GLHEPQVVLEGR		MP_MPAv1_NewWF_BGP_1_A.csv
	MP_MPAv1_NewWF_BGP_1_A.csv	75	Meta-Protein 765	Metagenome unknown	root	1	1	ATB_S_contig152742	ANRYPTGLPESVQEQQAAR		MP_MPAv1_NewWF_BGP_1_A.csv
	MP_MPAv1_NewWF_BGP_1_A.csv	76	Meta-Protein 766	Metagenome unknown	root	2	2	contig1416000046_5	AIGISGIEELFSDIPSEVKLDRRQEIIISQAVHPEYR		MP_MPAv1_NewWF_BGP_1_A.csv
	MP_MPAv1_NewWF_BGP_1_A.csv	77	Meta-Protein 767	Metagenome unknown	root	1	4	contig1030000018_22	MNKAELIANVADK		MP_MPAv1_NewWF_BGP_1_A.csv
	MP_MPAv1_NewWF_BGP_1_A.csv	78	Meta-Protein 768	Metagenome unknown	root	1	1	contig5383000018_6	LYDQIHISGAQGNATGR		MP_MPAv1_NewWF_BGP_1_A.csv
	MP_MPAv1_NewWF_BGP_1_A.csv	79	Meta-Protein 769	Metagenome unknown	root	4	8	contig109257000025_4	FAITSGSGEQILQTDILPK, KVGEAYELLR, LADKYFAPGEEGQIAALVALDEAMAKVGEAYELLR		MP_MPAv1_NewWF_BGP_1_A.csv
	MP_MPAv1_NewWF_BGP_1_A.csv	80	Meta-Protein 770	Metagenome unknown	root	2	3	contig139208000033_4	GVPLVADMSSDILSKPFDVSRSREELPTMLNYNTHAK		MP_MPAv1_NewWF_BGP_1_A.csv
	MP_MPAv1_NewWF_BGP_1_A.csv	81	Meta-Protein 771	Metagenome unknown	root	2	5	contig138537000043_1	MDNLIAAHYSAGQRVIVPSGQTAFEQIATMNWDSANAQAR		MP_MPAv1_NewWF_BGP_1_A.csv
	MP_MPAv1_NewWF_BGP_1_A.csv	82	Meta-Protein 772	Metagenome unknown	root	2	8	contig138125000070_10	NNASKEEIEAAKEWVKVVFEEIGWGDGPR		MP_MPAv1_NewWF_BGP_1_A.csv
	MP_MPAv1_NewWF_BGP_1_A.csv	83	Meta-Protein 773	Metagenome unknown	root	3	4	contig139284000058_42	LSDAFVIDLQYAR, LTHPVIDDVADLVLGYRSLYVGERDEADIAAR		MP_MPAv1_NewWF_BGP_1_A.csv
	MP_MPAv1_NewWF_BGP_1_A.csv	84	Meta-Protein 774	Metagenome unknown	root	2	2	contig139021000050_12	VKGEDVDYVFMGQVVPAGAGQVPSRVNVNGSAIAYGHPIGSSGAR		MP_MPAv1_NewWF_BGP_1_A.csv
	MP_MPAv1_NewWF_BGP_1_A.csv	85	Meta-Protein 775	Metagenome unknown	root	1	1	contig40734000008_6	ILKTEMPPMGHSR		MP_MPAv1_NewWF_BGP_1_A.csv
	MP_MPAv1_NewWF_BGP_1_A.csv	86	Meta-Protein 776	Metagenome unknown	root	1	1	contig158000004_28	ETAIASNEEKNFLK		MP_MPAv1_NewWF_BGP_1_A.csv
	MP_MPAv1_NewWF_BGP_1_A.csv	87	Meta-Protein 777	Metagenome unknown	root	1	1	contig107000061_18	LKVLTSSTDNSPSSFTK		MP_MPAv1_NewWF_BGP_1_A.csv
	MP_MPAv1_NewWF_BGP_1_A.csv	88	Meta-Protein 8	Metagenome unknown	root	8	17	contig32793000062_1, contig186000026_5	ADLDEETVYQITK, AFYESGDEIAAAHATGK, EIQLEGALEGITTPIHPGAAK, IQAEEPYFVR, IQAEEPYFVRK, KVIPAGTYDGQEEDIHTITCK, NVEDLKGLTIAVGPPGSGTVGLTEKVLAAAGLDINKDINPQNDTFGDAATK		MP_MPAv1_NewWF_BGP_1_A.csv
	MP_MPAv1_NewWF_BGP_1_A.csv	89	Meta-Protein 9	Metagenome unknown	root	1	4	contig355000043_1, contig548000060_5	KGYAEAFDYSSIDKAPEEKER		MP_MPAv1_NewWF_BGP_1_A.csv
	MP_MPAv1_NewWF_BGP_1_A.csv	90	Meta-Protein 778	Metagenome unknown	root	1	1	contig975000057_1	SYTEGIGKDIVEGK		MP_MPAv1_NewWF_BGP_1_A.csv
	MP_MPAv1_NewWF_BGP_1_A.csv	91	Meta-Protein 10	RS19_CLOBA 30S ribosomal protein S19 OS=Clostridium botulinum (strain Alaska E43 / Type E3) GN=rpsS PE=3 SV=1	root	2	1	B2UYB4, contig5731000013_1	HVPVYISEDMVGHKHVPVYLSEDMVGHK		MP_MPAv1_NewWF_BGP_1_A.csv
	MP_MPAv1_NewWF_BGP_1_A.csv	92	Meta-Protein 779	Metagenome unknown	root	2	3	contig139685000013_6	GELVTLVKEERIGLADQLVPVGEALAAAR		MP_MPAv1_NewWF_BGP_1_A.csv
	MP_MPAv1_NewWF_BGP_1_A.csv	93	Meta-Protein 780	Metagenome unknown	root	1	1	contig128689000011_1	GLCAGGDVVSIHDNAIK		MP_MPAv1_NewWF_BGP_1_A.csv
	MP_MPAv1_NewWF_BGP_1_A.csv	94	Meta-Protein 781	Metagenome unknown	root	5	17	contig4160000071_24	GNELVEQLLEDYSVIIK, ILMVGQRPSASLK, LEEMYDFVAEQIDEVAER, LQEADSVAIRGNELVEQLLEDYSVIIKVADQLDVYLADLHVLYTK		MP_MPAv1_NewWF_BGP_1_A.csv
	MP_MPAv1_NewWF_BGP_1_A.csv	95	Meta-Protein 782	Metagenome unknown	root	3	3	contig139751000014_14	FTGEVSVDEANNALIVNGK, SASYDEIKAVVKTSIFDAGAGISLNPNFVK		MP_MPAv1_NewWF_BGP_1_A.csv
	MP_MPAv1_NewWF_BGP_1_A.csv	96	Meta-Protein 783	HUTG_AROAE Formimidoylglutamase OS=Aromatoleum aromaticum (strain EbN1) GN=hutG PE=3 SV=1	Aromatoleum aromaticum EbN1	1	1	Q5NZY1	YCVLGIAEAANTAALFDR		MP_MPAv1_NewWF_BGP_1_A.csv
	MP_MPAv1_NewWF_BGP_1_A.csv	97	Meta-Protein 784	Metagenome unknown	root	3	3	contig138932000071_8	SSIVDAELTSVIEGNMAK, VLHEEFGIVKVPTPTVSVVDLVAELAKPATAEEINAALK		MP_MPAv1_NewWF_BGP_1_A.csv
	MP_MPAv1_NewWF_BGP_1_A.csv	98	Meta-Protein 785	Metagenome unknown	root	5	10	contig85000049_7	DQGSIFDQMYTHR, EAFNWLIDR, TGTDASPIWYGAHPK, VMASPLWTVLEEDLKDFPEFDEASRYTVLGTTFPDAAIR		MP_MPAv1_NewWF_BGP_1_A.csv
	MP_MPAv1_NewWF_BGP_1_A.csv	99	Meta-Protein 786	Metagenome unknown	root	1	1	contig105793000010_10	MASLYHELPEGR		MP_MPAv1_NewWF_BGP_1_A.csv
	MP_MPAv1_NewWF_BGP_1_A.csv	100	Meta-Protein 787	Metagenome unknown	root	3	11	contig719000070_1	LAEWHEEGIYHYGGR, NVIEEELEAIFAGAKVAIDQLNYSPPTSDTR		MP_MPAv1_NewWF_BGP_1_A.csv
	MP_MPAv1_NewWF_BGP_1_A.csv	101	Meta-Protein 788	Metagenome unknown	root	1	2	contig694000063_5	FRPEVQTLYR		MP_MPAv1_NewWF_BGP_1_A.csv
	MP_MPAv1_NewWF_BGP_1_A.csv	102	Meta-Protein 789	Metagenome unknown	root	1	1	contig839000072_3	TEALYADAIKDAK		MP_MPAv1_NewWF_BGP_1_A.csv
	MP_MPAv1_NewWF_BGP_1_A.csv	103	Meta-Protein 11	Metagenome unknown	root	3	3	contig138306000031_22, contig40000004_21	ELSVAIGKEPVEVAEAPGFVVNR, GKMTEEVKEEILSRMTEEVKEEILSR		MP_MPAv1_NewWF_BGP_1_A.csv
	MP_MPAv1_NewWF_BGP_1_A.csv	104	Meta-Protein 790	NCPR_PHACH NADPH--cytochrome P450 reductase OS=Phanerochaete chrysosporium GN=CPR PE=2 SV=1	Phanerochaete chrysosporium	1	1	Q9HDG2	GGSAEVEGAAELKLLK		MP_MPAv1_NewWF_BGP_1_A.csv
	MP_MPAv1_NewWF_BGP_1_A.csv	105	Meta-Protein 791	Metagenome unknown	root	1	1	contig139403000077_14	NFGDHNVASVLK		MP_MPAv1_NewWF_BGP_1_A.csv
	MP_MPAv1_NewWF_BGP_1_A.csv	106	Meta-Protein 792	Metagenome unknown	root	4	15	contig165000036_3	GTAYNYYDGTAWGTQISR, GTGTLADRGTAYNYYDGTAWGTQISR, IFHNQPIGNTEYDIQSNKIYLYPDGTIGATWIR		MP_MPAv1_NewWF_BGP_1_A.csv
	MP_MPAv1_NewWF_BGP_1_A.csv	107	Meta-Protein 793	Metagenome unknown	root	1	1	contig951000058_9	CDLVATGTTGKLVQEK		MP_MPAv1_NewWF_BGP_1_A.csv
	MP_MPAv1_NewWF_BGP_1_A.csv	108	Meta-Protein 794	Metagenome unknown	root	4	7	contig97935000027_2	GISAFILDIDPLPK, GVAILTGGLTTER, LANMYVGYETGRTQFGKPIAANQMIQEK		MP_MPAv1_NewWF_BGP_1_A.csv
	MP_MPAv1_NewWF_BGP_1_A.csv	109	Meta-Protein 795	Metagenome unknown	root	1	1	contig29531000030_1	VLRDNLQELPTGTR		MP_MPAv1_NewWF_BGP_1_A.csv
	MP_MPAv1_NewWF_BGP_1_A.csv	110	Meta-Protein 796	Metagenome unknown	root	1	1	contig139568000036_23	EVCLSVGLELK		MP_MPAv1_NewWF_BGP_1_A.csv
	MP_MPAv1_NewWF_BGP_1_A.csv	111	Meta-Protein 797	Metagenome unknown	root	1	5	contig138510000043_9	LHEVFDTYGPAIKR		MP_MPAv1_NewWF_BGP_1_A.csv
	MP_MPAv1_NewWF_BGP_1_A.csv	112	Meta-Protein 798	Metagenome unknown	root	1	1	contig139535000075_8	ITITGQNYPALKR		MP_MPAv1_NewWF_BGP_1_A.csv
	MP_MPAv1_NewWF_BGP_1_A.csv	113	Meta-Protein 799	Metagenome unknown	root	1	1	contig29057000024_1	IAIPANKVEENPAIK		MP_MPAv1_NewWF_BGP_1_A.csv
	MP_MPAv1_NewWF_BGP_1_A.csv	114	Meta-Protein 12	Metagenome unknown	root	2	5	ATB_S_contig125471, contig139074000060_7	ILEAASPHVFRQAVQNMVEQLGVDLVDAFR		MP_MPAv1_NewWF_BGP_1_A.csv
	MP_MPAv1_NewWF_BGP_1_A.csv	115	Meta-Protein 800	Metagenome unknown	root	1	2	contig105000065_34	NIVLEGFQSFNSK		MP_MPAv1_NewWF_BGP_1_A.csv
	MP_MPAv1_NewWF_BGP_1_A.csv	116	Meta-Protein 801	Metagenome unknown	root	1	2	contig2365000072_7	YVDKIEAPDDYTVK		MP_MPAv1_NewWF_BGP_1_A.csv
	MP_MPAv1_NewWF_BGP_1_A.csv	117	Meta-Protein 802	Metagenome unknown	root	1	1	contig21000022_13	MIEVTDKAAAELK		MP_MPAv1_NewWF_BGP_1_A.csv
	MP_MPAv1_NewWF_BGP_1_A.csv	118	Meta-Protein 803	Metagenome unknown	root	3	4	contig5994000012_6	AAEIANLDVWEGK, ALFAHHIGDLGERHPVSKLIGEVEREVDGEK		MP_MPAv1_NewWF_BGP_1_A.csv
	MP_MPAv1_NewWF_BGP_1_A.csv	119	Meta-Protein 804	Metagenome unknown	root	2	4	contig139021000050_8	AADKVIIIAEEMVPDSYLRMFAHSYVDAETIK		MP_MPAv1_NewWF_BGP_1_A.csv
	MP_MPAv1_NewWF_BGP_1_A.csv	120	Meta-Protein 13	Metagenome unknown	root	1	2	ATB_B_contig043573, contig47672000035_1	NIPVNHVVMMTNR		MP_MPAv1_NewWF_BGP_1_A.csv
	MP_MPAv1_NewWF_BGP_1_A.csv	121	Meta-Protein 14	Metagenome unknown	root	3	10	contig139290000061_8, contig18625000019_2	ALDATLDAIADELK, ALDATLDAIADELKSGGKMNKSELVDAIAQK		MP_MPAv1_NewWF_BGP_1_A.csv
	MP_MPAv1_NewWF_BGP_1_A.csv	122	Meta-Protein 805	Metagenome unknown	root	7	13	contig367000049_80	FFEAAEELKQK, FKELYPDEFPYEIK, GYAIISGDGDLWHAVENSSDQGWVVDGK, NLTQYDETINKVWR, REEFFDLSK, SDGELDFLGGQNMFEVFVPAGEFANGKSIAKDVWGTDDPEVIKGK		MP_MPAv1_NewWF_BGP_1_A.csv
	MP_MPAv1_NewWF_BGP_1_A.csv	123	Meta-Protein 806	Metagenome unknown	root	1	1	contig506000036_36	ITLRPSGFTDSQGNQTVR		MP_MPAv1_NewWF_BGP_1_A.csv
	MP_MPAv1_NewWF_BGP_1_A.csv	124	Meta-Protein 807	Metagenome unknown	root	3	4	contig5925000073_16	AGLFETKPMDQVKPGLDTVK, KAQLYPIGLRVGIVGVPCQVQAVR		MP_MPAv1_NewWF_BGP_1_A.csv
	MP_MPAv1_NewWF_BGP_1_A.csv	125	Meta-Protein 808	Metagenome unknown	root	1	1	contig139682000014_64	VSKPIEDLQTLDEESKR		MP_MPAv1_NewWF_BGP_1_A.csv
	MP_MPAv1_NewWF_BGP_1_A.csv	126	Meta-Protein 809	Metagenome unknown	root	2	5	contig32430000069_1	LSSIDNTIHGCEYSGNTPVKYPIPSIGADEVELLPINLK		MP_MPAv1_NewWF_BGP_1_A.csv
	MP_MPAv1_NewWF_BGP_1_A.csv	127	Meta-Protein 810	Metagenome unknown	root	1	1	contig139644000012_14	MNKAELVASIAEK		MP_MPAv1_NewWF_BGP_1_A.csv
	MP_MPAv1_NewWF_BGP_1_A.csv	128	Meta-Protein 811	Metagenome unknown	root	14	56	contig2999000006_3	AIYEGKSEYNADVLGR, ATQFGWISAPK, DGDNKPGITLTGFYR, GESEDRVDWEFSSGVK, GEVSQSFVKDGDNKPGITLTGFYR, GQTDVTAAATYTEAAFQLK, IGDTGPSVTFGAETK, LFVDGAVEGYNVGAAYELAK, LGLYDQYFK, LTIDATAPVVADVASVK, SRVEVPVADVATVTADFEGTTMR, TDVTAAATYTEAAFQLK, VEVPVADVATVTADFEGTTMRVVVQADGSIPAGDLDIALK		MP_MPAv1_NewWF_BGP_1_A.csv
	MP_MPAv1_NewWF_BGP_1_A.csv	129	Meta-Protein 812	Metagenome unknown	root	1	1	contig164000074_2	MNKEELITAMAK		MP_MPAv1_NewWF_BGP_1_A.csv
	MP_MPAv1_NewWF_BGP_1_A.csv	130	Meta-Protein 813	Metagenome unknown	root	1	2	contig608000075_3	VVAERLECYDDQTVAYNK		MP_MPAv1_NewWF_BGP_1_A.csv
	MP_MPAv1_NewWF_BGP_1_A.csv	131	Meta-Protein 15	MTRH_METAC Tetrahydromethanopterin S-methyltransferase subunit H OS=Methanosarcina acetivorans (strain ATCC 35395 / DSM 2834 / JCM 12185 / C2A) GN=mtrH PE=3 SV=1	root	16	29	Q8TU06, P80650, contig139803000041_1, O93716	AAAAQYCTEIGVADR, AAAENLWNTQVSLSDETGLPYVNQIVGETPESIKR, ECGIKYPIIDVAAMPLGAGSGATIR, ELGIEIADLADHPVTK, FDKKQEVFEIGGVK, FDKKQEVFELGGVK, GKIDILEVGGSGQTK, GKLDILEVGGSGQTK, IDILEVGGSGQTK, KQEVFEIGGVK, KQEVFELGGVK, LDILEVGGSGQTK, QEVFEIGGVK, QEVFELGGVK, TPFLIDSSAGNVRYIDWFVEIDDRTPFLIDSSAGNVR		MP_MPAv1_NewWF_BGP_1_A.csv
	MP_MPAv1_NewWF_BGP_1_A.csv	132	Meta-Protein 814	Metagenome unknown	root	1	1	contig139849000029_200	AASGQVLNAIAR		MP_MPAv1_NewWF_BGP_1_A.csv
	MP_MPAv1_NewWF_BGP_1_A.csv	133	Meta-Protein 815	Metagenome unknown	root	1	1	contig139571000027_51	AAFSGGSNLAIR		MP_MPAv1_NewWF_BGP_1_A.csv
	MP_MPAv1_NewWF_BGP_1_A.csv	134	Meta-Protein 16	Metagenome unknown	root	2	4	contig9289000011_7, contig25000035_5	FKVGSQLAETVKNKTEAALNAFMK		MP_MPAv1_NewWF_BGP_1_A.csv
	MP_MPAv1_NewWF_BGP_1_A.csv	135	Meta-Protein 17	Metagenome unknown	root	5	15	contig19946000025_1, contig6592000014_1, contig8409000050_2	GKNFVVTITGESK, KGEAGGFGSVSGVAVVEK, KVDVEADDTWSYK, KVEVEADDTWSYKLQASDAASAVIDALDSLYVDDTYVK		MP_MPAv1_NewWF_BGP_1_A.csv
	MP_MPAv1_NewWF_BGP_1_A.csv	136	Meta-Protein 816	Metagenome unknown	root	1	1	contig2626000004_7	AAAAGEHEEWAHDYPEFAR		MP_MPAv1_NewWF_BGP_1_A.csv
	MP_MPAv1_NewWF_BGP_1_A.csv	137	Meta-Protein 18	Metagenome unknown	root	4	11	contig271000025_28, contig47012000066_4	FHNYVQVYPAR, KMTAIGNQSQAVIDLHK, NSVISHYEILKSVDTFVQAIADAEALIGLEGVR		MP_MPAv1_NewWF_BGP_1_A.csv
	MP_MPAv1_NewWF_BGP_1_A.csv	138	Meta-Protein 817	Metagenome unknown	root	11	18	contig526000052_2	AKNAAIECINIIEEGAKK, DAQGYVLAYPNAYR, DMFVASDLNR, EVFDHAILR, MAYSSADEMVFGR, MVQIGAPAVVLETEHVQQMSNNPDWGAEIAHAQK, NAAIECINIIEEGAK, SLVAYEAGAVGPGK, SLVAYEAGAVGPGKDCGYENTICK, TGLGLEIGAGYTIPEVNYAPRPEAGVSKTIMEDYHDEYGIK		MP_MPAv1_NewWF_BGP_1_A.csv
	MP_MPAv1_NewWF_BGP_1_A.csv	139	Meta-Protein 818	Metagenome unknown	root	2	3	contig5353000053_2	AAMENIDIPSFNTLDELKKNQQQMNSMVQEAVK		MP_MPAv1_NewWF_BGP_1_A.csv
	MP_MPAv1_NewWF_BGP_1_A.csv	140	Meta-Protein 819	Metagenome unknown	root	1	1	contig349000078_4	AIKDFEAEYGVK		MP_MPAv1_NewWF_BGP_1_A.csv
	MP_MPAv1_NewWF_BGP_1_A.csv	141	Meta-Protein 19	Metagenome unknown	root	6	7	contig138978000039_11, contig1642000070_2	AQEVGLPVIVVNSK, ATIYQDGAGQVLK, EGEWIVAYIAK, NTVDAFHATINGAATR, NTVDAFHATLNGAATRVLAGEEVPKETMIDFVLVTQENVDQYLK		MP_MPAv1_NewWF_BGP_1_A.csv
	MP_MPAv1_NewWF_BGP_1_A.csv	142	Meta-Protein 820	Metagenome unknown	root	3	4	contig66257000008_1	AIFTDYVTGQLGEDGVKK, ATFNSPEGIDAMNWYVDLVRHLDDAAQKVDAALAQEK		MP_MPAv1_NewWF_BGP_1_A.csv
	MP_MPAv1_NewWF_BGP_1_A.csv	143	Meta-Protein 20	Metagenome unknown	root	5	13	contig580000049_18, ATB_B_contig001391	AGLPDLAMAVAESR, FAMLGEDEWCCGSALIR, NLTAVQLMELDSCVR, TGQAHINNVPLELAKWCPTYAASGEKPGLAPR		MP_MPAv1_NewWF_BGP_1_A.csv
	MP_MPAv1_NewWF_BGP_1_A.csv	144	Meta-Protein 821	Metagenome unknown	root	2	4	contig139611000012_1	IGNDIYSDLMYDALKSAQPIEAAYSHDPSFAR		MP_MPAv1_NewWF_BGP_1_A.csv
	MP_MPAv1_NewWF_BGP_1_A.csv	145	Meta-Protein 822	Metagenome unknown	root	1	2	contig2438000017_49	ISHFTDHYIFGPK		MP_MPAv1_NewWF_BGP_1_A.csv
	MP_MPAv1_NewWF_BGP_1_A.csv	146	Meta-Protein 823	Metagenome unknown	root	1	1	contig374000077_5	DDLSGLKAGGVNQLLFSTPSENVR		MP_MPAv1_NewWF_BGP_1_A.csv
	MP_MPAv1_NewWF_BGP_1_A.csv	147	Meta-Protein 21	ACDA2_METTE Acetyl-CoA decarbonylase/synthase complex subunit alpha 2 OS=Methanosarcina thermophila GN=cdhA2 PE=1 SV=1	root	5	12	Q9C4Z4, contig5383000018_31	DVYNIAEEFLSR, GNILNTGSCVSNAHISGTAHK, LKIPVIASNEK, NLSGNLAEIADYTLNRSGIPDVIVIDEQCVR		MP_MPAv1_NewWF_BGP_1_A.csv
	MP_MPAv1_NewWF_BGP_1_A.csv	148	Meta-Protein 22	HDRD_METBF CoB--CoM heterodisulfide reductase iron-sulfur subunit D OS=Methanosarcina barkeri (strain Fusaro / DSM 804) GN=hdrD PE=1 SV=4	Methanosarcina	1	2	P96797, Q8PVW3	YVLSHIPGVK		MP_MPAv1_NewWF_BGP_1_A.csv
	MP_MPAv1_NewWF_BGP_1_A.csv	149	Meta-Protein 824	Metagenome unknown	root	4	13	contig106788000030_4	AENGVLHISIPK, IVDDDQLQISFEK, TLLLPDNVDKEKVPAINIIENENEFLVEVAAPGLTKDDFK		MP_MPAv1_NewWF_BGP_1_A.csv
	MP_MPAv1_NewWF_BGP_1_A.csv	150	Meta-Protein 825	Metagenome unknown	root	3	3	contig1937000026_1	AAQIGDEAFAELLPNIK, EIALELEYLMRSIVFEEEHVTVK		MP_MPAv1_NewWF_BGP_1_A.csv
	MP_MPAv1_NewWF_BGP_1_A.csv	151	Meta-Protein 826	Metagenome unknown	root	10	17	contig4517000032_1	DMNAGVVVNPLDALK, HRIDALALVEGQK, IDGSQLLFDNK, ISFGGGTAETNFR, LLSLSGTYMGQELNAAEYMK, LTIDDREDNAYLATNSR, NMFDVGVDMAFMNR, QAVIDGGYVNALDGGASTNFMK, SKDMDLTISGNVAYQKTINMLSAEGYR		MP_MPAv1_NewWF_BGP_1_A.csv
	MP_MPAv1_NewWF_BGP_1_A.csv	152	Meta-Protein 827	Metagenome unknown	root	1	1	contig130000028_27	IILAEGEYQAAQK		MP_MPAv1_NewWF_BGP_1_A.csv
	MP_MPAv1_NewWF_BGP_1_A.csv	153	Meta-Protein 23	Metagenome unknown	root	4	9	ATB_S_contig008103, contig7928000044_2	DTHIAGATLEAIADLGNATNFSNWTR, GIEMEHCIFK, KGIEMEHCIFKYYNMDISNDYPLGAGYMR		MP_MPAv1_NewWF_BGP_1_A.csv
	MP_MPAv1_NewWF_BGP_1_A.csv	154	Meta-Protein 828	Metagenome unknown	root	1	1	contig139505000027_1	IDRGQQVSVYNTAEYMK		MP_MPAv1_NewWF_BGP_1_A.csv
	MP_MPAv1_NewWF_BGP_1_A.csv	155	Meta-Protein 829	Metagenome unknown	root	3	5	contig1429000034_2	SLEVFDYLNTDGEGLNFK, TNVYNGIYTADSPRYLYDPLVMEILNKPEPK		MP_MPAv1_NewWF_BGP_1_A.csv
	MP_MPAv1_NewWF_BGP_1_A.csv	156	Meta-Protein 830	Metagenome unknown	root	6	19	contig276000044_3	AFVDVYAVENFDIR, ANYLIGSSSTALK, ANYLIGSSSTALKFEAEK, ASFDADKDVVASVLAR, LATDADKNTNFALGSYKLTVLPFAQYEYNLDTEVSK		MP_MPAv1_NewWF_BGP_1_A.csv
	MP_MPAv1_NewWF_BGP_1_A.csv	157	Meta-Protein 831	Metagenome unknown	root	3	5	contig110925000008_1	NMDINEGNTNSIVLSNENFR, SYGPYRLETLEAAKVVIDVLDDAAAK		MP_MPAv1_NewWF_BGP_1_A.csv
	MP_MPAv1_NewWF_BGP_1_A.csv	158	Meta-Protein 832	Metagenome unknown	root	2	3	contig235000069_2	MFVPTVPDKEDRSVQDLDGIGMSILEISHR		MP_MPAv1_NewWF_BGP_1_A.csv
	MP_MPAv1_NewWF_BGP_1_A.csv	159	Meta-Protein 833	Metagenome unknown	root	1	1	contig6691000019_3	TLANVLENPK		MP_MPAv1_NewWF_BGP_1_A.csv
	MP_MPAv1_NewWF_BGP_1_A.csv	160	Meta-Protein 834	Metagenome unknown	root	2	3	contig889000014_1	AANTADQPNNVVPHLGGNAQISEGKNLEGGLEFTGDLR		MP_MPAv1_NewWF_BGP_1_A.csv
	MP_MPAv1_NewWF_BGP_1_A.csv	161	Meta-Protein 835	Metagenome unknown	root	1	4	contig137987000049_11	VNVNGGAIALGHPLGATGGR		MP_MPAv1_NewWF_BGP_1_A.csv
	MP_MPAv1_NewWF_BGP_1_A.csv	162	Meta-Protein 836	Metagenome unknown	root	3	6	contig139623000075_21	LILDSDDRYTVR, LVLDSDDRYTIRTGETLDLGEGYALEAK		MP_MPAv1_NewWF_BGP_1_A.csv
	MP_MPAv1_NewWF_BGP_1_A.csv	163	Meta-Protein 24	Metagenome unknown	root	4	8	contig3586000030_17, contig139244000058_8, contig206000060_11	FGVLNIGTPK, NIYNQIPDPK, NLYNQIPDPKQADIMVVTGAVNYK		MP_MPAv1_NewWF_BGP_1_A.csv
	MP_MPAv1_NewWF_BGP_1_A.csv	164	Meta-Protein 837	Metagenome unknown	root	1	1	contig2135000003_6	QQMATVIAVGPGGIVDGK		MP_MPAv1_NewWF_BGP_1_A.csv
	MP_MPAv1_NewWF_BGP_1_A.csv	165	Meta-Protein 25	Metagenome unknown	root	6	10	contig8919000019_3, contig188000065_11, contig13524000077_4	ASIRDDNPVIFVEHK, ASIRDDNPVLFVEHK, MKELSVAEAIR, QGEDVTVVATSMMVYK, TGGFGGEIAAIVAEEGFDYLDAPIKRTLVPLDKDIILSSVEK		MP_MPAv1_NewWF_BGP_1_A.csv
	MP_MPAv1_NewWF_BGP_1_A.csv	166	Meta-Protein 838	Metagenome unknown	root	1	1	contig138830000028_45	AAAFAETVHAFNHFQR		MP_MPAv1_NewWF_BGP_1_A.csv
	MP_MPAv1_NewWF_BGP_1_A.csv	167	Meta-Protein 839	Metagenome unknown	root	6	13	contig139592000044_3	DNISETALSFLK, GLAYANFNPIEGLVYTSR, LAQGNTHNYEFPFAANEFVSSSVYR, LSPISGESQSANPFIQR, SQDGQVFYNGQWQLSSLSRYINYLLDDAKK		MP_MPAv1_NewWF_BGP_1_A.csv
	MP_MPAv1_NewWF_BGP_1_A.csv	168	Meta-Protein 840	Metagenome unknown	root	3	8	contig12000069_29	GIIFDENGTIK, SGLSPSDIAAIGITNQRTFEPEMDSETRDNLYK		MP_MPAv1_NewWF_BGP_1_A.csv
	MP_MPAv1_NewWF_BGP_1_A.csv	169	Meta-Protein 26	Metagenome unknown	root	2	6	contig23778000045_1, contig134273000055_4	AGFLDEKGELPRVQTPDEGFLER		MP_MPAv1_NewWF_BGP_1_A.csv
	MP_MPAv1_NewWF_BGP_1_A.csv	170	Meta-Protein 841	ACDH_RALSO Acetaldehyde dehydrogenase OS=Ralstonia solanacearum (strain GMI1000) GN=dmpF PE=3 SV=1	Ralstonia solanacearum GMI1000	1	1	Q8XRG0	HGGPIEMGAMVGIDPGSDGLARAAR		MP_MPAv1_NewWF_BGP_1_A.csv
	MP_MPAv1_NewWF_BGP_1_A.csv	171	Meta-Protein 27	Metagenome unknown	root	6	10	contig138641000032_78, contig58038000077_2	ITEDTAGALDDERESLKLR, NEWITLDLPAGVR, TLTLELPENAR, VEVIEGDLRIDEGSVK, VGGTAGLSGELTVAEIIAPITAEAASVPEVRVSNINYIVDR		MP_MPAv1_NewWF_BGP_1_A.csv
	MP_MPAv1_NewWF_BGP_1_A.csv	172	Meta-Protein 842	Metagenome unknown	root	10	24	contig139244000058_10	DLTNEHIDLIQK, EGVLDVLER, FIDTKDYNQTTYICER, IAELYESIK, IKGFPTGEAIMR, LADVPIVVLTIDPCISCTER, LFDTEIPER, MLDRLEPQIKDIEK, NTPDWDIYKDLGFKQLAYEAGTAGPTLR		MP_MPAv1_NewWF_BGP_1_A.csv
	MP_MPAv1_NewWF_BGP_1_A.csv	173	Meta-Protein 28	Metagenome unknown	root	1	3	contig2637000042_1, contig139946000046_2, ATB_G5_contig013172	TNVETLIAR		MP_MPAv1_NewWF_BGP_1_A.csv
	MP_MPAv1_NewWF_BGP_1_A.csv	174	Meta-Protein 843	Metagenome unknown	root	2	5	contig19088000047_1	IHFQTVQQTVDEGGPLKRLNVAEQAMEFEFNSAK		MP_MPAv1_NewWF_BGP_1_A.csv
	MP_MPAv1_NewWF_BGP_1_A.csv	175	Meta-Protein 844	Metagenome unknown	root	4	9	contig139296000022_1	FYEDIPDVVESYMAEITK, LVDQEALEGFR, SAFYGKEDAPVIVGGRYIAENNIEFYTLNAVK		MP_MPAv1_NewWF_BGP_1_A.csv
	MP_MPAv1_NewWF_BGP_1_A.csv	176	Meta-Protein 29	Metagenome unknown	root	2	3	contig8588000062_2, ATB_B_contig006982	AAEMVQGLLAIMKATGAAQGVIGIEANKPDAIAK		MP_MPAv1_NewWF_BGP_1_A.csv
	MP_MPAv1_NewWF_BGP_1_A.csv	177	Meta-Protein 30	Metagenome unknown	root	1	3	contig24041000006_1, contig139855000004_1	IVVEPVGPNSVR		MP_MPAv1_NewWF_BGP_1_A.csv
	MP_MPAv1_NewWF_BGP_1_A.csv	178	Meta-Protein 31	Metagenome unknown	root	1	5	contig3004000041_5, contig6960000028_16, contig18460000011_3, contig47754000011_2	VFHPPVAIVAK		MP_MPAv1_NewWF_BGP_1_A.csv
	MP_MPAv1_NewWF_BGP_1_A.csv	179	Meta-Protein 845	Metagenome unknown	root	3	8	contig1563000070_2	DAVAMAISQVLQGWDIDSALR, DAVAMAISQVLQGWDIDSALREAEETVKISYGVYNYEAR		MP_MPAv1_NewWF_BGP_1_A.csv
	MP_MPAv1_NewWF_BGP_1_A.csv	180	Meta-Protein 846	Metagenome unknown	root	2	5	contig27000067_1	FNNVTVDIVPVNFEKTTVYTGNAVQITTSEGER		MP_MPAv1_NewWF_BGP_1_A.csv
	MP_MPAv1_NewWF_BGP_1_A.csv	181	Meta-Protein 32	Metagenome unknown	root	5	10	contig18621000050_1, contig5740000042_9, contig632000031_4	GFDFNSPEDIWDDMRR, TTGFEELKATVEK, VTPSMAGISYER, YADVEEITGVPTERYADVESITGVPTER		MP_MPAv1_NewWF_BGP_1_A.csv
	MP_MPAv1_NewWF_BGP_1_A.csv	182	Meta-Protein 847	Metagenome unknown	root	1	2	ATB_G30_contig026823	AFTSPEGTASFTAR		MP_MPAv1_NewWF_BGP_1_A.csv
	MP_MPAv1_NewWF_BGP_1_A.csv	183	Meta-Protein 848	Metagenome unknown	root	5	16	contig7021000063_1	DLNVAGVEFNYK, KGFELAGLNLNAK, STTTFGAEFEKGYVK, TNELGATYPIVEGTDLVVNYKVFNLDADTTVK		MP_MPAv1_NewWF_BGP_1_A.csv
	MP_MPAv1_NewWF_BGP_1_A.csv	184	Meta-Protein 849	Metagenome unknown	root	1	1	contig178000068_3	TPGIDMTAGSLGQGLSCAVGIAIGSKIK		MP_MPAv1_NewWF_BGP_1_A.csv
	MP_MPAv1_NewWF_BGP_1_A.csv	185	Meta-Protein 850	Metagenome unknown	root	4	5	contig98635000034_4	GGYGVTGNQNFSPGVATR, ISNESFMEPFDFIDDLK, LRDDLGYNDNFLGDVTLKLTYTTELTTETIR		MP_MPAv1_NewWF_BGP_1_A.csv
	MP_MPAv1_NewWF_BGP_1_A.csv	186	Meta-Protein 851	Metagenome unknown	root	1	1	contig139244000058_54	VYETADIQATESAVR		MP_MPAv1_NewWF_BGP_1_A.csv
	MP_MPAv1_NewWF_BGP_1_A.csv	187	Meta-Protein 852	Metagenome unknown	root	16	50	contig2438000017_48	AVSFVTEHLQGLVDK, AVSFVTEHLQGLVDKSTTSNDFSK, DVLTTLGDTGNAVWK, GIPGPLEQSLIGSK, IDGTAVPAGSSYLAAIPEK, IFTSGVVSGNLEYLK, INPVGDVDYTNPIGIYHMGR, ISVPVDLNAAK, LHEAIALIAGR, LSTYYLEVMDFVSK, MPGSASLYPGGYTYPATVADITK, NNQGMGLWEAPR, VNVTVDPLTR, VPFDTWIENTYK, VSTEVDANGVITDAQSSSLIFRYDGIPGEVGPLAR		MP_MPAv1_NewWF_BGP_1_A.csv
	MP_MPAv1_NewWF_BGP_1_A.csv	188	Meta-Protein 33	Metagenome unknown	root	33	95	contig6226000040_1, contig556000067_1, contig62180000044_1	ADVADLRVDEIDATLAAHLAGHEK, ADYDLNENLNLWGDVNWAK, AEFAPIEASYYHTYAR, AEFITELDVLNAR, AELDPIEASYYHTYAR, AEYAPIEASYYHTYAR, AGAKAELDPIEASYYHTYAR, AGIADVGAEYELAFGDLK, AGIANVSAEYALEFGDLK, AGLAFDLNDVTIVWPK, ANYAIYEGVDLK, AWDDYLSGVVAPHEVR, AWDDYLSTIVDEQEVR, DGIEAGTFYNRDEVNAK, DLLVVGTPWTK, DLQIEGTPWTK, FYLEEGAYEQYK, HFYETAGAWQDGGNRVTVK, IQEASAATPWIWR, IREESAAVAEVPWK, ISGSSEVKFEDIDIR, ISGSSEVKFEDVDIR, KDLQIEGT…		MP_MPAv1_NewWF_BGP_1_A.csv
	MP_MPAv1_NewWF_BGP_1_A.csv	189	Meta-Protein 853	Metagenome unknown	root	1	1	contig139950000004_67	VALTQVRENIR		MP_MPAv1_NewWF_BGP_1_A.csv
	MP_MPAv1_NewWF_BGP_1_A.csv	190	Meta-Protein 854	Metagenome unknown	root	2	3	ATB_S_contig164791	FVGWFGDVPEGEEENNPIIVTMDQPKIKLTAKPDFDWR		MP_MPAv1_NewWF_BGP_1_A.csv
	MP_MPAv1_NewWF_BGP_1_A.csv	191	Meta-Protein 855	Metagenome unknown	root	2	3	contig910000005_1	ISDPFQGTHQIGVKVGEAGASELLINPFPR		MP_MPAv1_NewWF_BGP_1_A.csv
	MP_MPAv1_NewWF_BGP_1_A.csv	192	Meta-Protein 856	Metagenome unknown	root	2	2	contig138481000043_7	VVAEPAREDIDSPVNETLIVELYSKWLEANAENYTGR		MP_MPAv1_NewWF_BGP_1_A.csv
	MP_MPAv1_NewWF_BGP_1_A.csv	193	Meta-Protein 857	Metagenome unknown	root	3	4	contig2279000069_13	MWHSVSNTAEYGGMTVGPK, TADVIMILLPDEKTYTEGIGVPGLIAVYQDATGNAR		MP_MPAv1_NewWF_BGP_1_A.csv
	MP_MPAv1_NewWF_BGP_1_A.csv	194	Meta-Protein 858	Metagenome unknown	root	1	1	contig138973000071_32	HGPEYSIVESLK		MP_MPAv1_NewWF_BGP_1_A.csv
	MP_MPAv1_NewWF_BGP_1_A.csv	195	Meta-Protein 859	Metagenome unknown	root	1	2	contig5985000023_1	MIINHNISSMNALR		MP_MPAv1_NewWF_BGP_1_A.csv
	MP_MPAv1_NewWF_BGP_1_A.csv	196	Meta-Protein 860	Metagenome unknown	root	1	2	contig2870000032_14	YYVGGVSMVR		MP_MPAv1_NewWF_BGP_1_A.csv
	MP_MPAv1_NewWF_BGP_1_A.csv	197	Meta-Protein 861	Metagenome unknown	root	3	8	contig138533000043_15	ADIADYVDLNLAVVR, LGVNYSPYVAKTPQYTLPVEFADVFAQAR		MP_MPAv1_NewWF_BGP_1_A.csv
	MP_MPAv1_NewWF_BGP_1_A.csv	198	Meta-Protein 34	Metagenome unknown	root	3	7	contig4268000036_1, ATB_S_contig090273	AFLGLDPSDPAGEAGR, AITGTVVYKDFPATNSGKGAGPADPRPVIITTHGYLNSK		MP_MPAv1_NewWF_BGP_1_A.csv
	MP_MPAv1_NewWF_BGP_1_A.csv	199	Meta-Protein 862	Metagenome unknown	root	1	1	contig750000062_5	AVMESAGIKDVLTK		MP_MPAv1_NewWF_BGP_1_A.csv
	MP_MPAv1_NewWF_BGP_1_A.csv	200	Meta-Protein 35	Metagenome unknown	root	1	2	contig3660000077_1, contig59451000063_2	FFVTGGTYAR		MP_MPAv1_NewWF_BGP_1_A.csv
	MP_MPAv1_NewWF_BGP_1_A.csv	201	Meta-Protein 863	Metagenome unknown	root	8	32	contig1343000027_19	AAVAVMPMWQVNQNNDWDFR, GATVTYVLHHDHLADFR, GYFVGDYQMR, LDDNGKVVFSLGEPEAVEALR, LPHNQFFQLASR, MDFGEIDFK, VVFSLGEPEAVEALRYLAGDSTYDLWR		MP_MPAv1_NewWF_BGP_1_A.csv
	MP_MPAv1_NewWF_BGP_1_A.csv	202	Meta-Protein 36	Metagenome unknown	root	16	65	contig39000065_1, ATB_B_contig013902, contig939000039_2	DRFEGYVPMHGYGAANYTNK, DSEAQLIAFNR, FEGYVPMHGYGAANYTNK, FTVEYLKENQVPR, GDVDVLPGLTRPADINIIK, ITIYTPTYEAAPTSAELGK, ITIYTPTYEVAPTSAELGK, KITIYTPTYEVAPTSAELGK, LIGHGPFILDQYK, LLDEAGYTVDPATGIR, LYDGMMEVDPDTMQDIPWLAK, QAADEAQLILAR, REPLADDVLR, SWDIETWEPAPGQEGTVITWHLEEGVK, VLNPCTGSSAYEWEVMGRWEPYGPYVDQIIMPIIK		MP_MPAv1_NewWF_BGP_1_A.csv
	MP_MPAv1_NewWF_BGP_1_A.csv	203	Meta-Protein 37	Metagenome unknown	root	1	2	contig4292000032_1, contig839000072_2	TATNEQANETIMAIR		MP_MPAv1_NewWF_BGP_1_A.csv
	MP_MPAv1_NewWF_BGP_1_A.csv	204	Meta-Protein 864	Metagenome unknown	root	3	7	contig580000049_51	AQANIDKSVNYLVQEFER, LMVEEAIDAKSVNYLVQEFER		MP_MPAv1_NewWF_BGP_1_A.csv
	MP_MPAv1_NewWF_BGP_1_A.csv	205	Meta-Protein 865	Metagenome unknown	root	1	1	contig2388000040_2	VAKDPITGDTFPEYK		MP_MPAv1_NewWF_BGP_1_A.csv
	MP_MPAv1_NewWF_BGP_1_A.csv	206	Meta-Protein 866	Metagenome unknown	root	1	1	contig1881000009_4	MTKTDLIDAVAEK		MP_MPAv1_NewWF_BGP_1_A.csv
	MP_MPAv1_NewWF_BGP_1_A.csv	207	Meta-Protein 38	Metagenome unknown	root	1	2	contig4997000050_2, contig138734000051_3	NLVYAYGGAVTR		MP_MPAv1_NewWF_BGP_1_A.csv
	MP_MPAv1_NewWF_BGP_1_A.csv	208	Meta-Protein 867	FTSZ_WIGBR Cell division protein FtsZ OS=Wigglesworthia glossinidia brevipalpis GN=ftsZ PE=3 SV=1	Wigglesworthia glossinidia endosymbiont of Glossina brevipalpis	1	1	Q9ALA3	GLGAGANPEVGKNSAEEDK		MP_MPAv1_NewWF_BGP_1_A.csv
	MP_MPAv1_NewWF_BGP_1_A.csv	209	Meta-Protein 868	Metagenome unknown	root	2	3	contig5930000027_5	YANLYTGGNYVNDPRYTSSLDSFMDELIR		MP_MPAv1_NewWF_BGP_1_A.csv
	MP_MPAv1_NewWF_BGP_1_A.csv	210	Meta-Protein 869	Metagenome unknown	root	1	1	ATB_G5_contig090521	GKPVLDVQPLSIGGKDNPAR		MP_MPAv1_NewWF_BGP_1_A.csv
	MP_MPAv1_NewWF_BGP_1_A.csv	211	Meta-Protein 870	Metagenome unknown	root	1	1	contig139826000013_3	HANRIEGAQFSLGGK		MP_MPAv1_NewWF_BGP_1_A.csv
	MP_MPAv1_NewWF_BGP_1_A.csv	212	Meta-Protein 871	Metagenome unknown	root	1	1	contig759000073_2	DGGQSVDHLHFHLLGGR		MP_MPAv1_NewWF_BGP_1_A.csv
	MP_MPAv1_NewWF_BGP_1_A.csv	213	Meta-Protein 872	Metagenome unknown	root	1	1	contig59728000017_1	KYYLAALTDATK		MP_MPAv1_NewWF_BGP_1_A.csv
	MP_MPAv1_NewWF_BGP_1_A.csv	214	Meta-Protein 873	Metagenome unknown	root	1	1	contig21307000072_1	AAGLTSGGEEALTAAAR		MP_MPAv1_NewWF_BGP_1_A.csv
	MP_MPAv1_NewWF_BGP_1_A.csv	215	Meta-Protein 874	Metagenome unknown	root	1	1	contig7221000001_1	LGIGTSSPSYDLHVQR		MP_MPAv1_NewWF_BGP_1_A.csv
	MP_MPAv1_NewWF_BGP_1_A.csv	216	Meta-Protein 39	Metagenome unknown	root	18	42	contig32718000056_2, contig36720000056_1, contig36093000038_1	AAGDLGAIATTFNYK, AGANYTLDKNNDLTEHVYTVDYAK, GKLAVIDTTFNYK, GTALTYFTGEVKEENAVK, KGFYENPFNYK, LAVIDTTFNYK, LILDYTFSDALK, LTLGYNFTDALK, NIEAGFTPIR, NIEAGFTPIRGTAGETK, NIEEDFTSIVGR, SYLDIEDATSR, TFNLGDFDVTPEFAMNLGDAK, TFNLGNIEVTPEFAMNK, TWTVEEVTNIIAGVEAK, YTLDKNNDLTEHVYTVDYAK, YTLDKNNDLTEHVYTVDYDKGIVTAGAKYTLNKDNDLSEHVYTVDYAK		MP_MPAv1_NewWF_BGP_1_A.csv
	MP_MPAv1_NewWF_BGP_1_A.csv	217	Meta-Protein 40	Metagenome unknown	root	3	16	contig38490000056_1, contig15801000005_1	IQTVGGGDDYGAALR, LYMEENPGVEVRTFDDLVEALDILEAK		MP_MPAv1_NewWF_BGP_1_A.csv
	MP_MPAv1_NewWF_BGP_1_A.csv	218	Meta-Protein 875	Metagenome unknown	root	8	23	contig3085000059_5	DATYDIFTFTNANRK, GLHDYSAPPPWYK, IVFDPNNPDVIYIGNDGGVFK, MIIGSYPYGELYR, SIGGPEAPGSDGFSSYLAPILLK, SLNGDNASFEQLANPWGTNVAR, SNEFGGNSQTFYSSGVTAYIKSQGLQWVNVGPTNLGGR		MP_MPAv1_NewWF_BGP_1_A.csv
	MP_MPAv1_NewWF_BGP_1_A.csv	219	Meta-Protein 876	Metagenome unknown	root	3	8	contig56000025_14	VAGVDGFLAR, VTSEWIIAPDVGWPLAVKVVEEQKVAGVDGFLAR		MP_MPAv1_NewWF_BGP_1_A.csv
	MP_MPAv1_NewWF_BGP_1_A.csv	220	Meta-Protein 877	Metagenome unknown	root	2	2	contig764000062_4	EKIQNAILDEYAKIQNAILDEYAK		MP_MPAv1_NewWF_BGP_1_A.csv
	MP_MPAv1_NewWF_BGP_1_A.csv	221	Meta-Protein 878	Metagenome unknown	root	1	2	contig56000025_6	FGFAGANDNHYSFK		MP_MPAv1_NewWF_BGP_1_A.csv
	MP_MPAv1_NewWF_BGP_1_A.csv	222	Meta-Protein 41	Metagenome unknown	root	5	11	contig1964000074_1, contig139549000078_1, contig2111000006_2	AREYGMGMVAVR, EGPTTAVLDGNHGMGHVIGVR, EIKELVEELDLDYDFPF, IVTDVLITADKFGIDSHGISRIYTAGEKEYLVCQER		MP_MPAv1_NewWF_BGP_1_A.csv
	MP_MPAv1_NewWF_BGP_1_A.csv	223	Meta-Protein 879	Metagenome unknown	root	1	1	contig209000018_2	QSDLLDLMGAVQVTGPEGFR		MP_MPAv1_NewWF_BGP_1_A.csv
	MP_MPAv1_NewWF_BGP_1_A.csv	224	Meta-Protein 880	Metagenome unknown	root	15	56	contig139855000004_3	AELYALKDLPIGK, AIEDNFIPYANVLGEHITAEQAAER, EAMNILIDREYISNEIYGGMAVAK, EYISNEIYGGMAVAK, FFPITASFPDYAR, FGPWVDEVIVVEEPDASAALSR, FITAGEKFPEGLK, FTTIEERNELFR, IERAELYALK, LEAGDIDVYAYTVSMPDLFQK, SVAYYPENFFAVSK, TSAEATPIWYLGDPGEGK, VVSIPTFETLEFVTTR, WDVFAEPMIAEVEIIGSRYAHDPVKADAIIAEEMVK		MP_MPAv1_NewWF_BGP_1_A.csv
	MP_MPAv1_NewWF_BGP_1_A.csv	225	Meta-Protein 881	Metagenome unknown	root	1	2	contig139732000078_56	NVTVEEINAAVK		MP_MPAv1_NewWF_BGP_1_A.csv
	MP_MPAv1_NewWF_BGP_1_A.csv	226	Meta-Protein 882	Metagenome unknown	root	17	38	contig124000001_4	AGTYNESDDEGEQLINSVMFNAGSEFK, DINFVNVGLGYNKDDLGGAK, ITADILAELDATVDELAK, LFGIDVDGSFAYVK, LGTEIGALSVDAR, LTGAAYTDAGLKYNDESSAAASIFGK, MLDIEEEIAANADYVDMVFSK, NEFSAELSLLGVR, NWINGDWRDPSK, VAAVEGTVAELDAK, VAAVEGTVAELDAKVEGAAAEIAELGAK, VDQIGATYVSQEQLADELEALGDK, VEGAAAEIAELGAK, VKDALADEDEEEESLLDNMLFDLK, VLGINYDFK, VVVEDVDEEVVRYNDESSAAASIFGK		MP_MPAv1_NewWF_BGP_1_A.csv
	MP_MPAv1_NewWF_BGP_1_A.csv	227	Meta-Protein 883	Metagenome unknown	root	1	1	contig216000029_26	AIADFEAANPGVK		MP_MPAv1_NewWF_BGP_1_A.csv
	MP_MPAv1_NewWF_BGP_1_A.csv	228	Meta-Protein 42	Metagenome unknown	root	4	8	contig23215000011_1, contig22319000028_1	ALDSPNIDDTYVK, IGTLQASDAANALIK, KSEVGTTTGAYHVFTTGTEKLQASDAANALIK		MP_MPAv1_NewWF_BGP_1_A.csv
	MP_MPAv1_NewWF_BGP_1_A.csv	229	Meta-Protein 884	Metagenome unknown	root	1	1	contig3625000041_2	IMIHQPMGGAQGQASQIEIQAK		MP_MPAv1_NewWF_BGP_1_A.csv
	MP_MPAv1_NewWF_BGP_1_A.csv	230	Meta-Protein 885	GL84_ORYSJ Germin-like protein 8-4 OS=Oryza sativa subsp. japonica GN=GER1 PE=2 SV=1	Oryza sativa Japonica Group	1	13	Q6YZZ6	IDYAPLGVNPPHIHPR		MP_MPAv1_NewWF_BGP_1_A.csv
	MP_MPAv1_NewWF_BGP_1_A.csv	231	Meta-Protein 43	Metagenome unknown	root	8	17	contig139375000056_14, contig138577000042_15	ADSAGFFDENGEPIINRPYLVR, DIAPATVFYR, DIAPATVFYRK, DIFEAAGLPSEPEEVQK, DTDGDGHPDHWMLADAGEIVGIMR, IGAWSTEWTEAIAR, LFSSWEGFVDVARRADSAGFFDENGEPIINRPYLVR		MP_MPAv1_NewWF_BGP_1_A.csv
	MP_MPAv1_NewWF_BGP_1_A.csv	232	Meta-Protein 886	Metagenome unknown	root	4	11	contig2438000017_47	EDVGIVGANIDTVAK, IKLEDIPSIVDDYGRPK, VAVGAAAVVAGVHAVRYLVIGNKPFKESLAEAAK		MP_MPAv1_NewWF_BGP_1_A.csv
	MP_MPAv1_NewWF_BGP_1_A.csv	233	Meta-Protein 44	Metagenome unknown	root	3	12	ATB_B_contig034993, ATB_S_contig065453, contig20420000036_1, ATB_G30_contig015991	AMAMEIQSAHQYMHQHFELDDQDFGELAK, ELGGEPTSQLAGPIVKIKELGGEPTSQLAGPIVK		MP_MPAv1_NewWF_BGP_1_A.csv
	MP_MPAv1_NewWF_BGP_1_A.csv	234	Meta-Protein 887	Metagenome unknown	root	5	18	contig279000074_7	ALVTPLIEK, EADILVLTVPLPAQK, EGAAGKPLLDATGPLEATIGGSPTR, FAQAGEEVIIGSRGAENPDAAKEADILVLTVPLPAQK		MP_MPAv1_NewWF_BGP_1_A.csv
	MP_MPAv1_NewWF_BGP_1_A.csv	235	Meta-Protein 45	Metagenome unknown	root	7	18	contig15072000059_12, contig139558000067_19	ANDAYVTTVTSDIR, KTGDFTSNLAVIEK, LANDDSFVHPLIGQNPYK, LGDAEVNIFPTWQELMR, LVIDDKINEMIDLVK, LVNYEGGYEDLSDAPYNAEDLKTKNKDLAWEFIK		MP_MPAv1_NewWF_BGP_1_A.csv
	MP_MPAv1_NewWF_BGP_1_A.csv	236	Meta-Protein 888	Metagenome unknown	root	2	2	contig139868000029_16	EQGIGITVDEFKKGVDIVGVVGR		MP_MPAv1_NewWF_BGP_1_A.csv
	MP_MPAv1_NewWF_BGP_1_A.csv	237	Meta-Protein 889	Metagenome unknown	root	2	3	contig85000044_75	DLVVASLGDVEYKNGNLGGQDQFQVLNK		MP_MPAv1_NewWF_BGP_1_A.csv
	MP_MPAv1_NewWF_BGP_1_A.csv	238	Meta-Protein 46	Metagenome unknown	root	5	11	contig104182000032_17, contig139489000022_15, contig1943000072_14	GGVHAMTLPIAR, LHEAGANVVIADLNEEKGNALAAK, LHGAGANVVIADLNEEKGK, TAIVTGGASGLGEAAAVRVNTIAPGTFDTPMLAQLPQAAR		MP_MPAv1_NewWF_BGP_1_A.csv
	MP_MPAv1_NewWF_BGP_1_A.csv	239	Meta-Protein 890	Metagenome unknown	root	6	7	contig855000012_5	AAGYSSSGVYDIPNMK, ALELIEVEYEELPCVLDIR, APAMPNDAASSALIK, VIAPYVGGGFGGK, VLPVDTDTSAYEWQTVASRYFGVPVEDIDIAESMVFVK		MP_MPAv1_NewWF_BGP_1_A.csv
	MP_MPAv1_NewWF_BGP_1_A.csv	240	Meta-Protein 891	Metagenome unknown	root	3	5	contig2521000001_1	DVILSTVDVKPAYQGLVATNGR, EPLFPNDTYFDRFLGPSGGYTSDAIK		MP_MPAv1_NewWF_BGP_1_A.csv
	MP_MPAv1_NewWF_BGP_1_A.csv	241	Meta-Protein 47	CAH_METTE Carbonic anhydrase OS=Methanosarcina thermophila PE=1 SV=1	Methanosarcina thermophila	1	2	P40881, contig139596000067_8	SAAIGVTIPDGR		MP_MPAv1_NewWF_BGP_1_A.csv
	MP_MPAv1_NewWF_BGP_1_A.csv	242	Meta-Protein 892	Metagenome unknown	root	1	2	contig72000024_1	SDIVDKDLISHAPNLK		MP_MPAv1_NewWF_BGP_1_A.csv
	MP_MPAv1_NewWF_BGP_1_A.csv	243	Meta-Protein 48	Metagenome unknown	root	7	27	contig46933000043_4, contig42641000011_4, ATB_G5_contig076341, ATB_G5_contig076343, contig1896000019_6	AAIEDAGAADPVKIAESLTK, AAVLYDVASDYSQGFTEFFEK, EAFKEGDVEFKPQLSR, IKDADPEVILMPYYYK, VESADYIFQEK, VTVEGVTGTIKVTVNDDGSVKEFNFR		MP_MPAv1_NewWF_BGP_1_A.csv
	MP_MPAv1_NewWF_BGP_1_A.csv	244	Meta-Protein 893	Metagenome unknown	root	4	4	contig436000044_3	ELSFEVGDPVNIIEIDQSLRR, KLTSYEFEFYEPYITK, LLGGTLPDSDKFRVQGVVFTDWGTAWDQGQSLQLQDLK		MP_MPAv1_NewWF_BGP_1_A.csv
	MP_MPAv1_NewWF_BGP_1_A.csv	245	Meta-Protein 894	Metagenome unknown	root	4	6	contig314000004_4	ALGYEYNETDPAIVAQAR, AVIEEFEQETGIR, EAVVGFMYSNQAVKFETNTPEDSLINR		MP_MPAv1_NewWF_BGP_1_A.csv
	MP_MPAv1_NewWF_BGP_1_A.csv	246	Meta-Protein 895	Metagenome unknown	root	2	6	contig1587000072_2	FDYELNFNVKTNWEFSGAVNAGHGLGK		MP_MPAv1_NewWF_BGP_1_A.csv
	MP_MPAv1_NewWF_BGP_1_A.csv	247	Meta-Protein 896	Metagenome unknown	root	1	1	contig139697000054_3	QVQIEEQDERLVHINSFAK		MP_MPAv1_NewWF_BGP_1_A.csv
	MP_MPAv1_NewWF_BGP_1_A.csv	248	Meta-Protein 897	Metagenome unknown	root	1	1	contig3796000002_7	IVVMKDGVIQQVATPR		MP_MPAv1_NewWF_BGP_1_A.csv
	MP_MPAv1_NewWF_BGP_1_A.csv	249	Meta-Protein 898	Metagenome unknown	root	1	1	contig138909000025_16	INIGAVEGIR		MP_MPAv1_NewWF_BGP_1_A.csv
	MP_MPAv1_NewWF_BGP_1_A.csv	250	Meta-Protein 899	Metagenome unknown	root	2	2	contig1179000041_2	AAEVTTDITPMSYTVEDGIITVKSGTQNTYALVVDNSTEGAESR		MP_MPAv1_NewWF_BGP_1_A.csv
	MP_MPAv1_NewWF_BGP_1_A.csv	251	Meta-Protein 900	GL32_ORYSJ Putative germin-like protein 3-2 OS=Oryza sativa subsp. japonica GN=Os03g0651800 PE=3 SV=1	Oryza sativa Japonica Group	1	2	Q7XZY1	TVSKGEVFVFPR		MP_MPAv1_NewWF_BGP_1_A.csv
	MP_MPAv1_NewWF_BGP_1_A.csv	252	Meta-Protein 901	Metagenome unknown	root	1	1	contig308000048_1	IVVVDGNVGFLGGFNIGKEYIGLSK		MP_MPAv1_NewWF_BGP_1_A.csv
	MP_MPAv1_NewWF_BGP_1_A.csv	253	Meta-Protein 902	YQGF_AGRRK Putative pre-16S rRNA nuclease OS=Agrobacterium radiobacter (strain K84 / ATCC BAA-868) GN=Arad_1906 PE=3 SV=1	Agrobacterium radiobacter K84	1	1	B9JDM7	TLTIEDLAVMLLPGQAIAGLDLGTK		MP_MPAv1_NewWF_BGP_1_A.csv
	MP_MPAv1_NewWF_BGP_1_A.csv	254	Meta-Protein 903	Metagenome unknown	root	1	2	contig7594000005_1	VGISMPTQSLQR		MP_MPAv1_NewWF_BGP_1_A.csv
	MP_MPAv1_NewWF_BGP_1_A.csv	255	Meta-Protein 904	Metagenome unknown	root	1	5	contig371000037_1	EGQDTFNPLKGSISPR		MP_MPAv1_NewWF_BGP_1_A.csv
	MP_MPAv1_NewWF_BGP_1_A.csv	256	Meta-Protein 905	Metagenome unknown	root	1	2	contig139864000004_67	ANIKPEQIAAIGITNQR		MP_MPAv1_NewWF_BGP_1_A.csv
	MP_MPAv1_NewWF_BGP_1_A.csv	257	Meta-Protein 49	Metagenome unknown	root	4	6	contig661000077_2, contig21618000012_2	AGYGQTSNQSVDPYATLGR, DIFAEYPMMNGPEFVALR, KLEPDFQGGFNTRSSTTNWAVENLLTYDR		MP_MPAv1_NewWF_BGP_1_A.csv
	MP_MPAv1_NewWF_BGP_1_A.csv	258	Meta-Protein 906	Metagenome unknown	root	2	2	contig127000011_10	DKYGYEYYEALGDQKVVIYTSMYEDIIEEVDR		MP_MPAv1_NewWF_BGP_1_A.csv
	MP_MPAv1_NewWF_BGP_1_A.csv	259	Meta-Protein 907	Metagenome unknown	root	1	1	contig139244000058_9	MLENTIDATEIK		MP_MPAv1_NewWF_BGP_1_A.csv
	MP_MPAv1_NewWF_BGP_1_A.csv	260	Meta-Protein 908	Metagenome unknown	root	1	1	contig1936000013_8	NRPVNIEANFTEVGTYK		MP_MPAv1_NewWF_BGP_1_A.csv
	MP_MPAv1_NewWF_BGP_1_A.csv	261	Meta-Protein 909	Metagenome unknown	root	1	1	contig98688000077_2	LEHTIANLGTSAENLQAAEAR		MP_MPAv1_NewWF_BGP_1_A.csv
	MP_MPAv1_NewWF_BGP_1_A.csv	262	Meta-Protein 910	Metagenome unknown	root	4	10	contig15960000028_2	AGFLMNDIGFK, NLDTEDNEADAITSLLASAEYKLDALTAK, SLNDDDADQDYRINEAFRYTYDALTFEGWYK		MP_MPAv1_NewWF_BGP_1_A.csv
	MP_MPAv1_NewWF_BGP_1_A.csv	263	Meta-Protein 911	Metagenome unknown	root	1	4	contig7318000020_1	DTGLLDVLIPIFEEK		MP_MPAv1_NewWF_BGP_1_A.csv
	MP_MPAv1_NewWF_BGP_1_A.csv	264	Meta-Protein 912	Metagenome unknown	root	3	6	contig779000036_2	FIFNSEVQEIQGEGR, GTGILDEWGYVVTGADMKTLEVGGEVIEAR		MP_MPAv1_NewWF_BGP_1_A.csv
	MP_MPAv1_NewWF_BGP_1_A.csv	265	Meta-Protein 913	Metagenome unknown	root	1	1	contig16670000078_3	AIVEAVNNFDNPAK		MP_MPAv1_NewWF_BGP_1_A.csv
	MP_MPAv1_NewWF_BGP_1_A.csv	266	Meta-Protein 914	Metagenome unknown	root	3	10	contig139252000077_1	IQMIDALDPLDVGTTSVTLK, NGVAHYDGEGNLAFVGNVRVGLTDFTFSTK		MP_MPAv1_NewWF_BGP_1_A.csv
	MP_MPAv1_NewWF_BGP_1_A.csv	267	Meta-Protein 50	Metagenome unknown	root	4	11	ATB_S_contig168501, contig561000051_2	APETREEFLDYVR, SAAFFSPEGVEALR, SVVDSEEFAALTEQFEFAKTGAPPGVVVLSPNDYFR		MP_MPAv1_NewWF_BGP_1_A.csv
	MP_MPAv1_NewWF_BGP_1_A.csv	268	Meta-Protein 915	Metagenome unknown	root	2	4	contig7741000043_1	VFAVNYDGTLVDPDGKVTKVEPYEELLTR		MP_MPAv1_NewWF_BGP_1_A.csv
	MP_MPAv1_NewWF_BGP_1_A.csv	269	Meta-Protein 916	Metagenome unknown	root	1	2	contig450000021_6	AVDADGNEIIFTAR		MP_MPAv1_NewWF_BGP_1_A.csv
	MP_MPAv1_NewWF_BGP_1_A.csv	270	Meta-Protein 917	Metagenome unknown	root	1	4	contig126880000017_1	IKELGGEPTSALAGPIVK		MP_MPAv1_NewWF_BGP_1_A.csv
	MP_MPAv1_NewWF_BGP_1_A.csv	271	Meta-Protein 918	Metagenome unknown	root	2	5	contig139535000067_7	AEEVIAYIEATMQDLESRSSTIGQASAQAAAEADTLQSK		MP_MPAv1_NewWF_BGP_1_A.csv
	MP_MPAv1_NewWF_BGP_1_A.csv	272	Meta-Protein 919	Metagenome unknown	root	1	1	contig417000031_3	EGVPSGTISIPTR		MP_MPAv1_NewWF_BGP_1_A.csv
	MP_MPAv1_NewWF_BGP_1_A.csv	273	Meta-Protein 920	Metagenome unknown	root	2	4	contig9629000079_4	LEPGEAIISQAGGRYTAQGLAEVAFSSSFPGR		MP_MPAv1_NewWF_BGP_1_A.csv
	MP_MPAv1_NewWF_BGP_1_A.csv	274	Meta-Protein 921	Metagenome unknown	root	1	1	contig60859000050_1	LMEGMGLGDSVNR		MP_MPAv1_NewWF_BGP_1_A.csv
	MP_MPAv1_NewWF_BGP_1_A.csv	275	Meta-Protein 922	Metagenome unknown	root	1	1	contig524000018_3	MTVGETTESSIEEIR		MP_MPAv1_NewWF_BGP_1_A.csv
	MP_MPAv1_NewWF_BGP_1_A.csv	276	Meta-Protein 923	Metagenome unknown	root	1	1	contig140139000023_36	GNSLIGGNSLYVSNR		MP_MPAv1_NewWF_BGP_1_A.csv
	MP_MPAv1_NewWF_BGP_1_A.csv	277	Meta-Protein 924	Metagenome unknown	root	2	5	contig139208000033_12	LEQVAAIDPDIYGLALQPEFARQATVEEALQEAQQR		MP_MPAv1_NewWF_BGP_1_A.csv
	MP_MPAv1_NewWF_BGP_1_A.csv	278	Meta-Protein 925	Metagenome unknown	root	1	1	contig36000013_1	QLEIQDNTGGIEVR		MP_MPAv1_NewWF_BGP_1_A.csv
	MP_MPAv1_NewWF_BGP_1_A.csv	279	Meta-Protein 51	Metagenome unknown	root	2	1	contig138932000003_4, contig139846000013_10	IQSAILEAYEKLQSAILEAYEK		MP_MPAv1_NewWF_BGP_1_A.csv
	MP_MPAv1_NewWF_BGP_1_A.csv	280	Meta-Protein 926	Metagenome unknown	root	8	12	contig136000041_32	GQLGGNAALNFTLPAK, LFGVNMAGK, LGDFQYPVPNYLAGNYHK, MAGMGIMITDYPVYQDK, SIDQDFAPFAR, TAAGSTTPTYILLLK, TALDITADYFNKKPAADTTLDKYDGFTGDIIGNTYLK		MP_MPAv1_NewWF_BGP_1_A.csv
	MP_MPAv1_NewWF_BGP_1_A.csv	281	Meta-Protein 927	Metagenome unknown	root	1	1	contig129517000039_19	HGETIFQYMLSK		MP_MPAv1_NewWF_BGP_1_A.csv
	MP_MPAv1_NewWF_BGP_1_A.csv	282	Meta-Protein 52	Metagenome unknown	root	4	6	contig218000021_91, contig7312000005_39	ELDLDIVGNADAIAAK, EVFSQVDEFRQPLK, TVAVNLEGTENALKYVNEAAAEIKNQV		MP_MPAv1_NewWF_BGP_1_A.csv
	MP_MPAv1_NewWF_BGP_1_A.csv	283	Meta-Protein 928	PELO_METMA Protein pelota homolog OS=Methanosarcina mazei (strain ATCC BAA-159 / DSM 3647 / Goe1 / Go1 / JCM 11833 / OCM 88) GN=pelA PE=3 SV=1	Methanosarcina mazei Go1	1	1	Q8PVZ0	EIVEQLRHAVPEDASIVIAGPGFTK		MP_MPAv1_NewWF_BGP_1_A.csv
	MP_MPAv1_NewWF_BGP_1_A.csv	284	Meta-Protein 929	Metagenome unknown	root	1	1	contig138850000076_3	MPAMILGDGMLGQVMEPVDISR		MP_MPAv1_NewWF_BGP_1_A.csv
	MP_MPAv1_NewWF_BGP_1_A.csv	285	Meta-Protein 930	Metagenome unknown	root	2	2	contig48000009_32	ETPIENVAAVYEAIEKQLDEYSSPQFIGGK		MP_MPAv1_NewWF_BGP_1_A.csv
	MP_MPAv1_NewWF_BGP_1_A.csv	286	Meta-Protein 931	Metagenome unknown	root	1	1	contig26343000034_1	LSGDVSVVIQPGTDR		MP_MPAv1_NewWF_BGP_1_A.csv
	MP_MPAv1_NewWF_BGP_1_A.csv	287	Meta-Protein 932	Metagenome unknown	root	3	11	contig542000061_2	FIEIGKDVLEK, IYAEINPDVTINIVETPWDDVQTKNFGVPFDNGAAITALR		MP_MPAv1_NewWF_BGP_1_A.csv
	MP_MPAv1_NewWF_BGP_1_A.csv	288	Meta-Protein 933	Metagenome unknown	root	1	1	contig37010000021_1	VVAINTNSDAETLTYLLK		MP_MPAv1_NewWF_BGP_1_A.csv
	MP_MPAv1_NewWF_BGP_1_A.csv	289	Meta-Protein 934	Metagenome unknown	root	3	15	ATB_B_contig103493	LVLADDYFTASIWGNK, LVLADDYFTASIWGNKQELSDKQELSDKATYFGMIK		MP_MPAv1_NewWF_BGP_1_A.csv
	MP_MPAv1_NewWF_BGP_1_A.csv	290	Meta-Protein 935	Metagenome unknown	root	2	4	contig11303000076_3	AIEGPLLGDITRAIEGPLLGDITRK		MP_MPAv1_NewWF_BGP_1_A.csv
	MP_MPAv1_NewWF_BGP_1_A.csv	291	Meta-Protein 936	Metagenome unknown	root	1	1	contig234000040_4	IAEILQYEAQR		MP_MPAv1_NewWF_BGP_1_A.csv
	MP_MPAv1_NewWF_BGP_1_A.csv	292	Meta-Protein 937	Metagenome unknown	root	2	8	contig561000049_7	NTRPIAEANAQEQALKLETEGQTLTRQINEAGTVATFVVDEVAGK		MP_MPAv1_NewWF_BGP_1_A.csv
	MP_MPAv1_NewWF_BGP_1_A.csv	293	Meta-Protein 938	Metagenome unknown	root	1	1	contig235000069_3	IVVLTEKPFAADAVNK		MP_MPAv1_NewWF_BGP_1_A.csv
	MP_MPAv1_NewWF_BGP_1_A.csv	294	Meta-Protein 939	Metagenome unknown	root	1	1	contig45506000017_2	EPHVVDLANFLNSMGAKIR		MP_MPAv1_NewWF_BGP_1_A.csv
	MP_MPAv1_NewWF_BGP_1_A.csv	295	Meta-Protein 53	Metagenome unknown	root	5	25	contig8738000040_2, contig112698000033_1	GINAFALGVR, MTESNLVGYVAAMPIPEVVR, TAENVGIYFGR, VFEGPIKDNQGVLRVVWTNTWYDPAR		MP_MPAv1_NewWF_BGP_1_A.csv
	MP_MPAv1_NewWF_BGP_1_A.csv	296	Meta-Protein 940	Metagenome unknown	root	1	1	contig139997000054_132	EVGSIVGMDILPENIHIMK		MP_MPAv1_NewWF_BGP_1_A.csv
	MP_MPAv1_NewWF_BGP_1_A.csv	297	Meta-Protein 941	Metagenome unknown	root	1	1	contig3263000071_6	VSGTHPNATTFGINFEDAR		MP_MPAv1_NewWF_BGP_1_A.csv
	MP_MPAv1_NewWF_BGP_1_A.csv	298	Meta-Protein 942	Metagenome unknown	root	1	1	contig2388000040_1	FEQPVYIDILK		MP_MPAv1_NewWF_BGP_1_A.csv
	MP_MPAv1_NewWF_BGP_1_A.csv	299	Meta-Protein 943	Metagenome unknown	root	1	1	contig2439000052_1	DLGDAQSCQVNINCSPEGDNWQVQKR		MP_MPAv1_NewWF_BGP_1_A.csv
	MP_MPAv1_NewWF_BGP_1_A.csv	300	Meta-Protein 54	Metagenome unknown	root	7	11	contig44026000045_1, contig1459000013_1, contig402000065_13	ATNILAGIEAAK, EFDAELLELGIR, GIADMLNR, KATNILAGIEAAK, TTFVGLTYDITEDVAANLDYK, VEEDNAINFIGFDVFANAAYRYEVATILAR		MP_MPAv1_NewWF_BGP_1_A.csv
	MP_MPAv1_NewWF_BGP_1_A.csv	301	Meta-Protein 944	Metagenome unknown	root	1	1	contig705000037_1	VGDVPIYMGAQGPK		MP_MPAv1_NewWF_BGP_1_A.csv
	MP_MPAv1_NewWF_BGP_1_A.csv	302	Meta-Protein 945	Metagenome unknown	root	1	1	contig3937000039_36	GASEIFAVGSRPNCVELAK		MP_MPAv1_NewWF_BGP_1_A.csv
	MP_MPAv1_NewWF_BGP_1_A.csv	303	Meta-Protein 946	Metagenome unknown	root	1	1	contig139409000022_38	GIFTNEAGLGSAPIAHAAATTDHPVR		MP_MPAv1_NewWF_BGP_1_A.csv
	MP_MPAv1_NewWF_BGP_1_A.csv	304	Meta-Protein 947	Metagenome unknown	root	1	2	contig764000012_2	TIVQETFYPNAPR		MP_MPAv1_NewWF_BGP_1_A.csv
	MP_MPAv1_NewWF_BGP_1_A.csv	305	Meta-Protein 948	Metagenome unknown	root	1	1	contig4145000033_2	LGEPVQILSR		MP_MPAv1_NewWF_BGP_1_A.csv
	MP_MPAv1_NewWF_BGP_1_A.csv	306	Meta-Protein 949	Metagenome unknown	root	5	10	contig139583000078_7	AALDEVDPSIIIYGEGWTAAESTLPLEQR, AGQEALWEVPGSEVSIPAR, AHVSQVPGVAVFSDDVR, AHVSQVPGVAVFSDDVRDGIKTSLVLVDGASFATGR		MP_MPAv1_NewWF_BGP_1_A.csv
	MP_MPAv1_NewWF_BGP_1_A.csv	307	Meta-Protein 950	Metagenome unknown	root	1	2	contig955000021_4	EVTLSHEMDWVR		MP_MPAv1_NewWF_BGP_1_A.csv
	MP_MPAv1_NewWF_BGP_1_A.csv	308	Meta-Protein 951	Metagenome unknown	root	1	1	contig712000076_7	AVSINSAEEINNFDTLKK		MP_MPAv1_NewWF_BGP_1_A.csv
	MP_MPAv1_NewWF_BGP_1_A.csv	309	Meta-Protein 55	ACDE1_METTE Acetyl-CoA decarbonylase/synthase complex subunit epsilon 1 OS=Methanosarcina thermophila GN=cdhB1 PE=1 SV=3	Methanosarcina	1	2	P72020, Q49162	YYINQVLSGTK		MP_MPAv1_NewWF_BGP_1_A.csv
	MP_MPAv1_NewWF_BGP_1_A.csv	310	Meta-Protein 56	Metagenome unknown	root	8	22	contig42661000063_2, contig138985000072_30	AIKDYFDGVDIPK, DIFTIGIDGNPDAIEDVSK, IAILEGVPGYHTTER, LAPDRESNFQAQVAMVEDMIQR, MIKTPTEIVDLDNWER, NVDAIAICAINDK, NVDAIALCAINDKTPTEIVDLDNWER		MP_MPAv1_NewWF_BGP_1_A.csv
	MP_MPAv1_NewWF_BGP_1_A.csv	311	Meta-Protein 952	Metagenome unknown	root	1	1	contig493000036_8	IVLTISRPKGGAGQAEGAEAESDSESEEGEAEASAE		MP_MPAv1_NewWF_BGP_1_A.csv
	MP_MPAv1_NewWF_BGP_1_A.csv	312	Meta-Protein 57	Metagenome unknown	root	20	75	contig139780000044_9, contig110043000024_1, contig139511000048_1, contig139284000056_1	AGDIDVWATTSSNATAFDSVR, ALELSLEDSPR, ATALNVEWLGYQAGPSLR, DQGHIFEQMFSR, DQGHIFTQMYTVR, FVTVGEVYPGGLVVPR, GFISNPYTGSR, GMASPLWLAMDPIPELDEISEK, IFTVDQISFIPK, IYTVDQISYIAR, KLVGDYVGEQLSK, LIDRDYIAQELYGGLALPK, LVGDYVGEQLSK, MEVTVQEGLPVAK, MGTWVDEVIIVEEPDVSTAISR, MGTWVDEVVIVEEPNITTAISR, TIIASELMDAGAK, TIMLNNAYVDYSR, YAYDFEEAKTIIASELMDAGAKYNMLNNSYVDYSR		MP_MPAv1_NewWF_BGP_1_A.csv
	MP_MPAv1_NewWF_BGP_1_A.csv	313	Meta-Protein 953	Metagenome unknown	root	9	20	contig1343000027_20	AFVNGTGANLGDPMQAVR, IAYLSGNTELFK, KLEAGVTYAPENLWTK, LINIYAHEEQKELQIPAFVGR, LNADWQITDNVK, LSENSFQVGLVEVK, LTYTGIDKVTLVGEVGR, NDYILGAVITTKVGDDLALTGQAVASGINAFGFYGK		MP_MPAv1_NewWF_BGP_1_A.csv
	MP_MPAv1_NewWF_BGP_1_A.csv	314	Meta-Protein 954	Metagenome unknown	root	1	1	contig616000034_1	AFDPYSEDNTWTAK		MP_MPAv1_NewWF_BGP_1_A.csv
	MP_MPAv1_NewWF_BGP_1_A.csv	315	Meta-Protein 955	Metagenome unknown	root	1	1	contig139677000041_17	AGELGIYQAYNLLK		MP_MPAv1_NewWF_BGP_1_A.csv
	MP_MPAv1_NewWF_BGP_1_A.csv	316	Meta-Protein 956	ZEAA_MAIZE Zein-alpha 19D1 OS=Zea mays PE=2 SV=1	Zea mays	1	5	P06678	FEYPTIQSYR		MP_MPAv1_NewWF_BGP_1_A.csv
	MP_MPAv1_NewWF_BGP_1_A.csv	317	Meta-Protein 957	Metagenome unknown	root	1	1	contig489000062_4	TPGTGYNYLGFNTK		MP_MPAv1_NewWF_BGP_1_A.csv
	MP_MPAv1_NewWF_BGP_1_A.csv	318	Meta-Protein 958	Metagenome unknown	root	1	2	contig11916000048_3	GGMQTTTDPSAPAQAPAGRPPRR		MP_MPAv1_NewWF_BGP_1_A.csv
	MP_MPAv1_NewWF_BGP_1_A.csv	319	Meta-Protein 959	Metagenome unknown	root	4	10	contig2980000056_1	AFLFIEALYTDAK, ASGVDKLIAEMQR, GWIHPDAATMENTAEQMKNMLNFGIEGIHYTVNPDGR		MP_MPAv1_NewWF_BGP_1_A.csv
	MP_MPAv1_NewWF_BGP_1_A.csv	320	Meta-Protein 960	Metagenome unknown	root	2	2	contig1004000014_23	AAEVWVGDNPSLGLHVGRIAATEGLGEMDLSK		MP_MPAv1_NewWF_BGP_1_A.csv
	MP_MPAv1_NewWF_BGP_1_A.csv	321	Meta-Protein 961	Metagenome unknown	root	1	1	contig138826000019_55	MKVDISEVIMTVGEQLNIDK		MP_MPAv1_NewWF_BGP_1_A.csv
	MP_MPAv1_NewWF_BGP_1_A.csv	322	Meta-Protein 962	Metagenome unknown	root	1	2	contig139536000068_2	HFYTASDVPAGQTSTISIGMDK		MP_MPAv1_NewWF_BGP_1_A.csv
	MP_MPAv1_NewWF_BGP_1_A.csv	323	Meta-Protein 963	Metagenome unknown	root	2	3	contig6733000046_7	ITGVGILSYKLLAAPNDFYSVR		MP_MPAv1_NewWF_BGP_1_A.csv
	MP_MPAv1_NewWF_BGP_1_A.csv	324	Meta-Protein 964	Metagenome unknown	root	1	1	contig11417000023_40	VIDPLEIDR		MP_MPAv1_NewWF_BGP_1_A.csv
	MP_MPAv1_NewWF_BGP_1_A.csv	325	Meta-Protein 965	Metagenome unknown	root	1	1	contig36923000009_2	VFWAENRPTPGTYSTGGSGFSNVR		MP_MPAv1_NewWF_BGP_1_A.csv
	MP_MPAv1_NewWF_BGP_1_A.csv	326	Meta-Protein 966	Metagenome unknown	root	8	51	contig559000061_3	DNVQEALIDSGYYDAGEFTGI, EQLAAIIGEVTTDWDMNVAK, FEDVIAETPYSVEVLFSQGSSAAEK, FEGVTVISYDR, QRVDVGIVLPTKDEPR, SIADVFAADPDVTEYFITGQDAEK, TPQTDATYFNQAIDVPSKVLAADAMNMAIDILEGR		MP_MPAv1_NewWF_BGP_1_A.csv
	MP_MPAv1_NewWF_BGP_1_A.csv	327	Meta-Protein 967	Metagenome unknown	root	2	2	contig11018000029_1	ADDLDIFDKVNAVPNVPALRISGLEASAELMK		MP_MPAv1_NewWF_BGP_1_A.csv
	MP_MPAv1_NewWF_BGP_1_A.csv	328	Meta-Protein 968	Metagenome unknown	root	1	2	contig2647000035_2	AIQMVAENLVK		MP_MPAv1_NewWF_BGP_1_A.csv
	MP_MPAv1_NewWF_BGP_1_A.csv	329	Meta-Protein 969	Metagenome unknown	root	2	5	contig10211000053_3	AMQGIPVSEETLSVESIQKDLAAVAHEKVEDILK		MP_MPAv1_NewWF_BGP_1_A.csv
	MP_MPAv1_NewWF_BGP_1_A.csv	330	Meta-Protein 970	DBF4B_XENLA Protein DBF4 homolog B OS=Xenopus laevis GN=dbf4b PE=1 SV=1	Xenopus laevis	1	1	Q283Q6	AIGRLGGIIESFLSR		MP_MPAv1_NewWF_BGP_1_A.csv
	MP_MPAv1_NewWF_BGP_1_A.csv	331	Meta-Protein 58	Metagenome unknown	root	1	2	ATB_G30_contig049232, ATB_S_contig019152	FCTVDNSLVGVAGDTK		MP_MPAv1_NewWF_BGP_1_A.csv
	MP_MPAv1_NewWF_BGP_1_A.csv	332	Meta-Protein 971	NIFJ_NOSS1 Pyruvate-flavodoxin oxidoreductase OS=Nostoc sp. (strain PCC 7120 / SAG 25.82 / UTEX 2576) GN=nifJ PE=2 SV=2	Nostoc sp. PCC 7120	1	3	Q06879	SLATHALSIFGDHSDVMAAR		MP_MPAv1_NewWF_BGP_1_A.csv
	MP_MPAv1_NewWF_BGP_1_A.csv	333	Meta-Protein 59	Metagenome unknown	root	3	5	contig71747000069_1, contig16763000020_11	VMDVAPYIKNDR, VSDVEIVETKADTIVARYLALALGVAEDDIVWDAAAQK		MP_MPAv1_NewWF_BGP_1_A.csv
	MP_MPAv1_NewWF_BGP_1_A.csv	334	Meta-Protein 972	Metagenome unknown	root	1	2	contig694000065_1	YSISDTAEYGDYAVGDR		MP_MPAv1_NewWF_BGP_1_A.csv
	MP_MPAv1_NewWF_BGP_1_A.csv	335	Meta-Protein 973	Metagenome unknown	root	3	8	contig850000016_2	ATANVTEELTDVGVK, LLDQFDISDLVKYAISPDTSLELSYR		MP_MPAv1_NewWF_BGP_1_A.csv
	MP_MPAv1_NewWF_BGP_1_A.csv	336	Meta-Protein 974	Metagenome unknown	root	1	1	contig139244000058_7	VGPPLLQPYYDVK		MP_MPAv1_NewWF_BGP_1_A.csv
	MP_MPAv1_NewWF_BGP_1_A.csv	337	Meta-Protein 975	Metagenome unknown	root	1	2	contig139212000073_46	GANAGPVYTEPFANVR		MP_MPAv1_NewWF_BGP_1_A.csv
	MP_MPAv1_NewWF_BGP_1_A.csv	338	Meta-Protein 976	RL7A_METTP 50S ribosomal protein L7Ae OS=Methanosaeta thermophila (strain DSM 6194 / JCM 14653 / NBRC 101360 / PT) GN=rpl7ae PE=3 SV=1	Methanosaeta thermophila PT	1	1	A0B601	QSDVGAAAGLSVKSAAAAIIEPGK		MP_MPAv1_NewWF_BGP_1_A.csv
	MP_MPAv1_NewWF_BGP_1_A.csv	339	Meta-Protein 60	Metagenome unknown	root	5	12	ATB_G30_contig089443, ATB_G5_contig006421, contig43418000003_2	LSNIDYNEEFR, LSNIDYNEEFRNSLHENVK, TILNDSFLEYQK, TILNDSFLEYQKVNVLKVELDEEEINNLNK		MP_MPAv1_NewWF_BGP_1_A.csv
	MP_MPAv1_NewWF_BGP_1_A.csv	340	Meta-Protein 977	Metagenome unknown	root	1	1	ATB_B_contig021183	ALSTHALSIFGDHSDVMAAR		MP_MPAv1_NewWF_BGP_1_A.csv
	MP_MPAv1_NewWF_BGP_1_A.csv	341	Meta-Protein 978	Metagenome unknown	root	3	6	contig202000013_24	CGVAIDTIEDFFDLTK, GFPQLEISDAAYRMLFTQELLDQSSLLR		MP_MPAv1_NewWF_BGP_1_A.csv
	MP_MPAv1_NewWF_BGP_1_A.csv	342	Meta-Protein 979	Metagenome unknown	root	2	4	contig4470000000_1	LNEEVISIVRRGHNFTLNADFK		MP_MPAv1_NewWF_BGP_1_A.csv
	MP_MPAv1_NewWF_BGP_1_A.csv	343	Meta-Protein 61	Metagenome unknown	root	3	4	contig139486000056_32, contig139843000029_23	IEAEGGSVAPWVK, LLEIIPGKDTDPEVLQFMADFGERNWDALDAALKR		MP_MPAv1_NewWF_BGP_1_A.csv
	MP_MPAv1_NewWF_BGP_1_A.csv	344	Meta-Protein 980	Metagenome unknown	root	1	2	contig2992000075_9	YPFLLIDKIEELVPGQK		MP_MPAv1_NewWF_BGP_1_A.csv
	MP_MPAv1_NewWF_BGP_1_A.csv	345	Meta-Protein 981	Metagenome unknown	root	1	2	contig5904000061_1	GGAPVYVDTLMK		MP_MPAv1_NewWF_BGP_1_A.csv
	MP_MPAv1_NewWF_BGP_1_A.csv	346	Meta-Protein 982	Metagenome unknown	root	2	2	contig3914000032_2	GVGTVGQAAAGLMTEQPEKGVGTVGQAAAGLMTEQPEKFGK		MP_MPAv1_NewWF_BGP_1_A.csv
	MP_MPAv1_NewWF_BGP_1_A.csv	347	Meta-Protein 983	Metagenome unknown	root	1	1	contig874000053_10	SGGTYEGSDFVQASANFR		MP_MPAv1_NewWF_BGP_1_A.csv
	MP_MPAv1_NewWF_BGP_1_A.csv	348	Meta-Protein 62	Metagenome unknown	root	2	2	contig20158000042_1, contig60_30	TSVVTGVEMFRTSVVTGVEMFRK		MP_MPAv1_NewWF_BGP_1_A.csv
	MP_MPAv1_NewWF_BGP_1_A.csv	349	Meta-Protein 984	Metagenome unknown	root	2	2	contig5498000047_1	GTTGDLAAIGDLRTRFEEDLATWYADQQGLR		MP_MPAv1_NewWF_BGP_1_A.csv
	MP_MPAv1_NewWF_BGP_1_A.csv	350	Meta-Protein 985	Metagenome unknown	root	1	1	contig139628000068_101	DRETYAIAPHLPGGIVDPK		MP_MPAv1_NewWF_BGP_1_A.csv
	MP_MPAv1_NewWF_BGP_1_A.csv	351	Meta-Protein 986	Metagenome unknown	root	1	2	contig2105000017_3	LGTADEPLEKLEFK		MP_MPAv1_NewWF_BGP_1_A.csv
	MP_MPAv1_NewWF_BGP_1_A.csv	352	Meta-Protein 987	Metagenome unknown	root	4	7	contig203000016_1	KPNVAYNQAGYAPDFSK, LDNPLPADLAGK, VALIELDPFYDAPITAYIDRWIVVGSAADAIVNR		MP_MPAv1_NewWF_BGP_1_A.csv
	MP_MPAv1_NewWF_BGP_1_A.csv	353	Meta-Protein 63	ACDB1_METTE Acetyl-CoA decarbonylase/synthase complex subunit beta 1 OS=Methanosarcina thermophila GN=cdhC1 PE=1 SV=3	root	14	46	P72021, Q8TJC4, Q8PZ11, Q9V2Z4, contig5383000018_29, Q8TRZ6, contig14471000019_29, Q8PV85	AAAKVDPEGPQFSIDKGELLDANTGEYSGVNEVAKK, AEFPFEISPMFEGER, DTAAKLDSLEPFGK, EYQGMAPNGIGFSTMAGQTGGGK, EYQGMAPNGLGFSTMAGQTGGGK, IATEKDATDIESLKAFLQEK, IATEKDVTDIESLK, KEGMFVELGGPK, MQVTFYTDQAEVEK, SLGIELVR, SLGLELVR, TKDLHDEDVDVFYGCTLCQSFAPTNVCVVSPDR, VHDFINYCQGIMHLNQRVSLCGAINWFDGR		MP_MPAv1_NewWF_BGP_1_A.csv
	MP_MPAv1_NewWF_BGP_1_A.csv	354	Meta-Protein 988	Metagenome unknown	root	2	3	contig98635000034_3	LQEYPADQFAITTKMIDEWGIEFLGEGR		MP_MPAv1_NewWF_BGP_1_A.csv
	MP_MPAv1_NewWF_BGP_1_A.csv	355	Meta-Protein 64	Metagenome unknown	root	6	14	contig430000063_3, contig139190000073_1	FSGPALLGYEEEVVLGK, GLGVPVQWDNNTK, GSIYIEGLQIR, IITPFTVDVEAVELK, TIPEGTFNMAVTTLGSKYVSQGLGVSADDVLYANK		MP_MPAv1_NewWF_BGP_1_A.csv
	MP_MPAv1_NewWF_BGP_1_A.csv	356	Meta-Protein 65	Metagenome unknown	root	4	7	contig511000038_34, contig139327000021_6, Q97MV0, contig138774000006_15	KVLTEIQDGTFAK, VAVCGYGSQGHAHALNLK, VLTEIQDGTFAKYSISDTAEYGDYVTGNR		MP_MPAv1_NewWF_BGP_1_A.csv
	MP_MPAv1_NewWF_BGP_1_A.csv	357	Meta-Protein 989	Metagenome unknown	root	2	2	contig110000076_4	DILPLPTDIVQSAWLDPGKIYEPIGMIR		MP_MPAv1_NewWF_BGP_1_A.csv
	MP_MPAv1_NewWF_BGP_1_A.csv	358	Meta-Protein 990	Metagenome unknown	root	3	6	contig139610000012_9	AGVPAAGTIEEMVEK, ILFVGQGISSTAEIIEFARVADAVQAQDDMEVIGVSK		MP_MPAv1_NewWF_BGP_1_A.csv
	MP_MPAv1_NewWF_BGP_1_A.csv	359	Meta-Protein 991	Metagenome unknown	root	5	20	contig3509000009_26	AESTGNTLTAGELGIDLNRPLQR, AFAVNGIIPDSK, AFAVNGIIPDSKEQIEYK, NTGNIPGQLFISATESSSVQSLADNVKNVDSSIQNNEMGQTLNVDMK		MP_MPAv1_NewWF_BGP_1_A.csv
	MP_MPAv1_NewWF_BGP_1_A.csv	360	Meta-Protein 992	Metagenome unknown	root	3	7	contig3191000053_2	ALGYDVFGR, IGAAFTGLVDSENSDQKVGAEYDFPQVPGLK		MP_MPAv1_NewWF_BGP_1_A.csv
	MP_MPAv1_NewWF_BGP_1_A.csv	361	Meta-Protein 993	Metagenome unknown	root	3	7	contig518000047_69	AVSLGLDKGIEDVALTDVVSR, LIYNAMFATNSKSATEFAPNDNITFQEAVTMAVR		MP_MPAv1_NewWF_BGP_1_A.csv
	MP_MPAv1_NewWF_BGP_1_A.csv	362	Meta-Protein 994	Metagenome unknown	root	2	4	contig15756000037_1	LVEVLSQYTSPDLVKTAMDEAWWK		MP_MPAv1_NewWF_BGP_1_A.csv
	MP_MPAv1_NewWF_BGP_1_A.csv	363	Meta-Protein 66	Metagenome unknown	root	4	10	contig202000038_2, contig139393000067_1	AGLEVLTVAEAAK, DLALAYANGVGGAR, LADIIMILLPDEKQAAVYKSEIAPNLEK		MP_MPAv1_NewWF_BGP_1_A.csv
	MP_MPAv1_NewWF_BGP_1_A.csv	364	Meta-Protein 67	Metagenome unknown	root	2	4	contig40257000043_1, contig11896000049_1	LPTEAEWEAERTSWSSNNAAGAFASPLK		MP_MPAv1_NewWF_BGP_1_A.csv
	MP_MPAv1_NewWF_BGP_1_A.csv	365	Meta-Protein 995	Metagenome unknown	root	1	2	contig139248000015_80	DYEGGIIPVLQEAQNIYGYLPK		MP_MPAv1_NewWF_BGP_1_A.csv
	MP_MPAv1_NewWF_BGP_1_A.csv	366	Meta-Protein 996	Metagenome unknown	root	1	2	ATB_G30_contig022353	FFESIDQVPTR		MP_MPAv1_NewWF_BGP_1_A.csv
	MP_MPAv1_NewWF_BGP_1_A.csv	367	Meta-Protein 997	Metagenome unknown	root	1	1	contig10843000012_2	LQLLSSGLGNLNVQASISD		MP_MPAv1_NewWF_BGP_1_A.csv
	MP_MPAv1_NewWF_BGP_1_A.csv	368	Meta-Protein 998	Metagenome unknown	root	2	3	contig233000079_14	FTDAAEVADWAQRGGLTEAQAQIFNSNAGINR		MP_MPAv1_NewWF_BGP_1_A.csv
	MP_MPAv1_NewWF_BGP_1_A.csv	369	Meta-Protein 999	Metagenome unknown	root	3	3	contig139220000033_1	FGDSIDGDNVAFGIVADTK, LQDGALVLQGEYVNRSLTGELWYESGK		MP_MPAv1_NewWF_BGP_1_A.csv
	MP_MPAv1_NewWF_BGP_1_A.csv	370	Meta-Protein 1000	Metagenome unknown	root	1	1	contig140241000023_42	FKDEIVPVVIPQR		MP_MPAv1_NewWF_BGP_1_A.csv
	MP_MPAv1_NewWF_BGP_1_A.csv	371	Meta-Protein 68	Metagenome unknown	root	4	7	contig7312000005_43, contig218000021_95	GDAFVLNPLVK, GENEPGGIAFGFLADICQSSR, GIPQYDPDVGTPLGQRVFTGNDEIADEIDQR		MP_MPAv1_NewWF_BGP_1_A.csv
	MP_MPAv1_NewWF_BGP_1_A.csv	372	Meta-Protein 1001	Metagenome unknown	root	2	4	contig111000028_98	LEPFASPYAPFGVSSLQYKNFVAAGGKDYTMIGDLAK		MP_MPAv1_NewWF_BGP_1_A.csv
	MP_MPAv1_NewWF_BGP_1_A.csv	373	Meta-Protein 1002	Metagenome unknown	root	1	1	contig4340000055_1	AEALALVIR		MP_MPAv1_NewWF_BGP_1_A.csv
	MP_MPAv1_NewWF_BGP_1_A.csv	374	Meta-Protein 69	ACDE2_METTE Acetyl-CoA decarbonylase/synthase complex subunit epsilon 2 OS=Methanosarcina thermophila GN=cdhB2 PE=1 SV=1	root	5	17	Q9C4Z3, Q8TJC5, contig5383000018_30	ADHVAALDEVIDLL, NIPIAATGSSMPGFVDKDVNAK, NYIQNATMSFGNLSK, VLDPELLDRYYINQVLSATK		MP_MPAv1_NewWF_BGP_1_A.csv
	MP_MPAv1_NewWF_BGP_1_A.csv	375	Meta-Protein 70	Metagenome unknown	root	3	12	contig14108000049_2, contig19385000007_1	IAVIDTGIDPDHPDLEAK, LPQAWAVTTGDPGVRLTAVPDFDWVFLR		MP_MPAv1_NewWF_BGP_1_A.csv
	MP_MPAv1_NewWF_BGP_1_A.csv	376	Meta-Protein 1003	Metagenome unknown	root	3	4	contig1699000011_2	DLGFIAPFNTFKDDEKPADPLAK, NIFDLYIDNSITDRNIFDLYIDNSITDRK		MP_MPAv1_NewWF_BGP_1_A.csv
	MP_MPAv1_NewWF_BGP_1_A.csv	377	Meta-Protein 1004	Metagenome unknown	root	2	5	contig139041000003_9	APWQIGELAGINVPKIADYLQLGGNTEEEKVQLLIK		MP_MPAv1_NewWF_BGP_1_A.csv
	MP_MPAv1_NewWF_BGP_1_A.csv	378	Meta-Protein 71	Metagenome unknown	root	5	13	contig121270000001_6, contig833000012_2	AIVVNQAVPGTVAAIR, HMAMPLLAK, HVIYPDNFMQEQETTIAQITGLAADPDVK, IGIVTGTVSQGEDEYRGAEKMELSDLDAVK		MP_MPAv1_NewWF_BGP_1_A.csv
	MP_MPAv1_NewWF_BGP_1_A.csv	379	Meta-Protein 1005	Metagenome unknown	root	3	5	contig11840000062_1	ANPDLGWTGVGGNKFEPTNPASAQMIYK, GLSEIADVAELTNADVATALVEGLKYQAAILYLR		MP_MPAv1_NewWF_BGP_1_A.csv
	MP_MPAv1_NewWF_BGP_1_A.csv	380	Meta-Protein 72	Metagenome unknown	root	1	1	ATB_S_contig011402, contig138755000019_7	VISPDAAVSLAAK		MP_MPAv1_NewWF_BGP_1_A.csv
	MP_MPAv1_NewWF_BGP_1_A.csv	381	Meta-Protein 73	Metagenome unknown	root	1	2	contig38753000018_1, contig1737000059_1	ATFTGDDPAVVNALR		MP_MPAv1_NewWF_BGP_1_A.csv
	MP_MPAv1_NewWF_BGP_1_A.csv	382	Meta-Protein 1006	Metagenome unknown	root	3	7	contig26615000038_1	LFPVKDGYTFEPPFDTVTK, LNLEDDDAQYSVLKTAEDEVVTLTGTLSK		MP_MPAv1_NewWF_BGP_1_A.csv
	MP_MPAv1_NewWF_BGP_1_A.csv	383	Meta-Protein 1007	Metagenome unknown	root	1	1	contig3616000057_4	LAGIDTIVSQGNMQSTSR		MP_MPAv1_NewWF_BGP_1_A.csv
	MP_MPAv1_NewWF_BGP_1_A.csv	384	Meta-Protein 1008	Metagenome unknown	root	1	2	contig3085000059_14	ISEGNYLTAPATWEEK		MP_MPAv1_NewWF_BGP_1_A.csv
	MP_MPAv1_NewWF_BGP_1_A.csv	385	Meta-Protein 1009	Metagenome unknown	root	1	3	contig765000008_8	IREIGQTIGEIVGGEAIHPSNPR		MP_MPAv1_NewWF_BGP_1_A.csv
	MP_MPAv1_NewWF_BGP_1_A.csv	386	Meta-Protein 74	Metagenome unknown	root	5	10	contig645000003_1, contig209000035_25	GDLWRLEDFEVR, LDYALDFYTPEYR, VGQFVYELGPVVLK, VNFDWDKNYLADTRYSPYIADFHNENR		MP_MPAv1_NewWF_BGP_1_A.csv
	MP_MPAv1_NewWF_BGP_1_A.csv	387	Meta-Protein 1010	Metagenome unknown	root	4	5	contig91000041_15	GNLFGTAPEDAVYAR, GTDALEGEEAAWMSDIILVKPGTEYR, NPSFEQAVNLPLGWTPTRTDKNIFIWENAATVR		MP_MPAv1_NewWF_BGP_1_A.csv
	MP_MPAv1_NewWF_BGP_1_A.csv	388	Meta-Protein 1011	Metagenome unknown	root	3	7	contig165000036_2	FFVLGDAHTDDGTYYTSFK, GNKFFVLGDAHTDDGTYYTSFKVNVVPDFAITDGLPK		MP_MPAv1_NewWF_BGP_1_A.csv
	MP_MPAv1_NewWF_BGP_1_A.csv	389	Meta-Protein 1012	Metagenome unknown	root	1	1	contig131175000044_1	VVAWYDNENSYTSNMVR		MP_MPAv1_NewWF_BGP_1_A.csv
	MP_MPAv1_NewWF_BGP_1_A.csv	390	Meta-Protein 75	Metagenome unknown	root	6	13	contig139174000033_2, contig139628000068_79, P38503, contig139097000017_30, contig942000055_2	AEAYGPITQGIAKPINDLSR, AEAYGPITQGLAKPINDLSR, ANVFIFPDLNAGNIAYK, GIANVVLIGKEEDIK, LGEVDGVVSGAVHSSSDTLRPAVQIVKRDEYVQAFYELR		MP_MPAv1_NewWF_BGP_1_A.csv
	MP_MPAv1_NewWF_BGP_1_A.csv	391	Meta-Protein 76	CB3_ARATH Chlorophyll a-b binding protein 3, chloroplastic OS=Arabidopsis thaliana GN=LHCB3 PE=1 SV=1	Streptophyta	1	2	Q9S7M0, P27489	VDFKEPVWFK		MP_MPAv1_NewWF_BGP_1_A.csv
	MP_MPAv1_NewWF_BGP_1_A.csv	392	Meta-Protein 1013	Metagenome unknown	root	3	6	contig28460000055_8	ALTGEQTIDQVIDYITK, ALTLILETGEGYSKFGLEDIPEIQNKR		MP_MPAv1_NewWF_BGP_1_A.csv
	MP_MPAv1_NewWF_BGP_1_A.csv	393	Meta-Protein 1014	Metagenome unknown	root	1	2	contig29390000059_2	YEAGPNLTAFYR		MP_MPAv1_NewWF_BGP_1_A.csv
	MP_MPAv1_NewWF_BGP_1_A.csv	394	Meta-Protein 77	Metagenome unknown	root	20	122	contig5156000023_3, contig575000028_4, contig568000074_10, ATB_S_contig003262, ATB_B_contig124062, contig563000031_9	AEISVASDLAQGIGSTHLWPSTIR, ALELSLLDSPR, ATQLDIEWLGYNTGPSLPVLAK, FEQYSEPADKWAMFDEPR, FITVGEKYPEGLTAPR, FITVGEKYPEGLTAPRK, GEPYAVEHIQEVK, GFVSNPYTGNYMPHR, GFVSNPYTGNYMPHRIER, GHFWIGNGPMYLEK, IERIEVTVEEGLPVAK, IEVTVEEGLPVAK, IYTVDQLSYIPR, KTVVYYREDLYDTVLWHDGSK, MGSQQVLVEPWNPVAGSNWAFDNLAIR, NFSSMEERNDLYAR, RAEISVASDLAQGIGSTHLWPSTIR, RFEQYSEPADKWAMFDEPR, TVVYYREDLYDTVLWHDGSKWAMFDEPR		MP_MPAv1_NewWF_BGP_1_A.csv
	MP_MPAv1_NewWF_BGP_1_A.csv	395	Meta-Protein 1015	Metagenome unknown	root	2	2	contig5743000014_9	ELAMAGAVFGEYEVVKVGFTGMAYQPVVAGEAK		MP_MPAv1_NewWF_BGP_1_A.csv
	MP_MPAv1_NewWF_BGP_1_A.csv	396	Meta-Protein 1016	Metagenome unknown	root	1	1	contig288000066_3	DINPQAPTHILIVPK		MP_MPAv1_NewWF_BGP_1_A.csv
	MP_MPAv1_NewWF_BGP_1_A.csv	397	Meta-Protein 78	Metagenome unknown	root	8	84	contig50096000040_3, ATB_S_contig003263	ALEFQYAYDFETGK, EAMNYIIDRDYIAQELYEGLAQPK, LVGDYVSEQLSK, MGTWVDEVIIVEEPNINTAISR, QIIWEEMMNHGAK, RLVGDYVSEQLSK, RMGTWVDEVIIVEEPNINTAISRTLMLNPAYVDYAR		MP_MPAv1_NewWF_BGP_1_A.csv
	MP_MPAv1_NewWF_BGP_1_A.csv	398	Meta-Protein 1017	Metagenome unknown	root	1	3	contig3046000009_1	NTVLDFVENEVIPK		MP_MPAv1_NewWF_BGP_1_A.csv
	MP_MPAv1_NewWF_BGP_1_A.csv	399	Meta-Protein 1018	Metagenome unknown	root	2	2	contig139920000046_24	GAETFYEAIQMGAEIYHVLGKGVDMGAGNALLLK		MP_MPAv1_NewWF_BGP_1_A.csv
	MP_MPAv1_NewWF_BGP_1_A.csv	400	Meta-Protein 79	Metagenome unknown	root	9	29	contig101000017_4, contig139681000053_2	AAEAYLTYAEAVVR, ADGGTTGDIEFPDTDVPFMR, ADLFQWIETELKEIEPEMYEPK, GASPIDGYTALQAINEIR, KVIDSPYQLATK, NWGSSIFLIDATR, QLTNIDKDGILDEWAR, TDGMPTWGTTGGWGGNRYLFMADNAGTIDGSTVNDAPK		MP_MPAv1_NewWF_BGP_1_A.csv
	MP_MPAv1_NewWF_BGP_1_A.csv	401	Meta-Protein 1019	Metagenome unknown	root	1	3	contig30533000059_2	HTAWVVGAGVNAVTEFK		MP_MPAv1_NewWF_BGP_1_A.csv
	MP_MPAv1_NewWF_BGP_1_A.csv	402	Meta-Protein 1020	Metagenome unknown	root	1	1	contig139797000078_11	TKEVINIPASTVPVFK		MP_MPAv1_NewWF_BGP_1_A.csv
	MP_MPAv1_NewWF_BGP_1_A.csv	403	Meta-Protein 1021	Metagenome unknown	root	1	1	contig138382000066_8	FIEFATSPEIQAK		MP_MPAv1_NewWF_BGP_1_A.csv
	MP_MPAv1_NewWF_BGP_1_A.csv	404	Meta-Protein 1022	Metagenome unknown	root	2	4	contig2206000056_2	FADIAAAMGENIDGLSVRLATLEDVIEIFK		MP_MPAv1_NewWF_BGP_1_A.csv
	MP_MPAv1_NewWF_BGP_1_A.csv	405	Meta-Protein 1023	Metagenome unknown	root	1	1	contig139726000014_29	LEEMPGEEGYPAYLASR		MP_MPAv1_NewWF_BGP_1_A.csv
	MP_MPAv1_NewWF_BGP_1_A.csv	406	Meta-Protein 1024	Metagenome unknown	root	1	1	contig5250000062_3	LEEMPGEEGYPAYLGTR		MP_MPAv1_NewWF_BGP_1_A.csv
	MP_MPAv1_NewWF_BGP_1_A.csv	407	Meta-Protein 80	Metagenome unknown	root	1	2	contig181000020_5, contig26513000074_1	GATTQTYNQPILSELEK		MP_MPAv1_NewWF_BGP_1_A.csv
	MP_MPAv1_NewWF_BGP_1_A.csv	408	Meta-Protein 1025	Metagenome unknown	root	1	2	contig39175000035_2	WDAMTASTLDYTPK		MP_MPAv1_NewWF_BGP_1_A.csv
	MP_MPAv1_NewWF_BGP_1_A.csv	409	Meta-Protein 1026	Metagenome unknown	root	2	2	contig53608000063_4	DGYIITNNHVIKDARVVGTDPQSDIALLK		MP_MPAv1_NewWF_BGP_1_A.csv
	MP_MPAv1_NewWF_BGP_1_A.csv	410	Meta-Protein 1027	Metagenome unknown	root	2	3	contig139148000015_9	IGGLGPLTGDAATYGQSVKYNAAPDAFAALSYDSTR		MP_MPAv1_NewWF_BGP_1_A.csv
	MP_MPAv1_NewWF_BGP_1_A.csv	411	Meta-Protein 1028	CHEB3_SHEON Chemotaxis response regulator protein-glutamate methylesterase of group 3 operon OS=Shewanella oneidensis (strain MR-1) GN=cheB3 PE=3 SV=1	Shewanella oneidensis MR-1	1	1	Q8EEQ0	GLLEMHQCGAITLAQDEASCVVYGMPKEAVK		MP_MPAv1_NewWF_BGP_1_A.csv
	MP_MPAv1_NewWF_BGP_1_A.csv	412	Meta-Protein 1029	Metagenome unknown	root	8	15	contig179000025_4	AGDGDVFVVGGMESMSTAPYAVPK, DLTAPQLAAVVIR, EKAESLGLKPLAQVK, FQAEIVPVVIPQR, ILEETNLPPEEIDEVILGNVLQAAAGQNPAR, RILEETNLPPEEIDEVILGNVLQAAAGQNPAR, SYASSALDPGIMGLGPVEATRSYASSALDPGIMGLGPVEATRR		MP_MPAv1_NewWF_BGP_1_A.csv
	MP_MPAv1_NewWF_BGP_1_A.csv	413	Meta-Protein 81	MCRG_METBF Methyl-coenzyme M reductase subunit gamma OS=Methanosarcina barkeri (strain Fusaro / DSM 804) GN=mcrG PE=1 SV=3	root	15	104	P07964, contig1068000023_29, contig9000014_11	APGSDYPSTHPPLAEMGEPACSIR, APGSDYPSTHPPLAEMGEPACSIRENVEPTPGAK, EISDEDLTAILGHR, LEGGTIIMDKDQVAIPLDR, LEGGTIIMDKDQVAIPLDRK, LQEDGVMFDMLDR, LQEDGVMFDMLDRR, LREISDEDLTAILGHR, QFYPGATSVAENR, RLEGGTIIMDKDQVAIPLDR, SYFAAINFR, TTIYRVDNVPFRDDAEVIEWVQR, VDNVPFRDDAEVIEWVQR, VQMETEITDPALSGMRYVQFTDSMYNAPATPYFR		MP_MPAv1_NewWF_BGP_1_A.csv
	MP_MPAv1_NewWF_BGP_1_A.csv	414	Meta-Protein 1030	Metagenome unknown	root	2	5	contig139045000003_98	AQVGYGTATYDILGSGKLETQDVSGRNLGQVAANYLFLEQDILR		MP_MPAv1_NewWF_BGP_1_A.csv
	MP_MPAv1_NewWF_BGP_1_A.csv	415	Meta-Protein 1031	Metagenome unknown	root	1	1	contig2291000020_3	GAAAELHNVDFMDMIHR		MP_MPAv1_NewWF_BGP_1_A.csv
	MP_MPAv1_NewWF_BGP_1_A.csv	416	Meta-Protein 82	Metagenome unknown	root	1	1	contig102134000047_1, contig3601000013_3	VAVLEEGIGGWK		MP_MPAv1_NewWF_BGP_1_A.csv
	MP_MPAv1_NewWF_BGP_1_A.csv	417	Meta-Protein 1032	Metagenome unknown	root	1	1	ATB_B_contig005293	SGDSHLNLIVPGYYYR		MP_MPAv1_NewWF_BGP_1_A.csv
	MP_MPAv1_NewWF_BGP_1_A.csv	418	Meta-Protein 83	Metagenome unknown	root	3	4	contig2454000064_24, contig12939000026_2	FEGPTIMVYGR, FEGPTLMVYGRIVVDDYYTTSGGYSQER		MP_MPAv1_NewWF_BGP_1_A.csv
	MP_MPAv1_NewWF_BGP_1_A.csv	419	Meta-Protein 84	Metagenome unknown	root	1	2	contig56388000052_5, contig138000059_9	IGATNTIFWAR		MP_MPAv1_NewWF_BGP_1_A.csv
	MP_MPAv1_NewWF_BGP_1_A.csv	420	Meta-Protein 1033	Metagenome unknown	root	4	9	contig4517000032_2	GGDWFDGGLWQDLFK, GIYDLNTFTADEVMLPTR, VATLDNILDERYETDPTAQAAGQLPHNDWVLFR		MP_MPAv1_NewWF_BGP_1_A.csv
	MP_MPAv1_NewWF_BGP_1_A.csv	421	Meta-Protein 1034	Metagenome unknown	root	1	1	contig1629000027_1	LIESQIIGYAYR		MP_MPAv1_NewWF_BGP_1_A.csv
	MP_MPAv1_NewWF_BGP_1_A.csv	422	Meta-Protein 1035	Metagenome unknown	root	1	1	ATB_S_contig101421	WNYDITTNTVLK		MP_MPAv1_NewWF_BGP_1_A.csv
	MP_MPAv1_NewWF_BGP_1_A.csv	423	Meta-Protein 1036	Metagenome unknown	root	3	3	contig139244000058_11	ADKTWEINLFR, ETVKVSVPIVDKPKGSITFNPENCILCGLCQK		MP_MPAv1_NewWF_BGP_1_A.csv
	MP_MPAv1_NewWF_BGP_1_A.csv	424	Meta-Protein 1037	Metagenome unknown	root	3	5	contig14801000056_2	LLELGIPEELAVGEGGYAR, NVFNFVENLVAEGKVNLNLDDEIIR		MP_MPAv1_NewWF_BGP_1_A.csv
	MP_MPAv1_NewWF_BGP_1_A.csv	425	Meta-Protein 1038	Metagenome unknown	root	1	6	contig138565000018_15	IYLDTHPNDQEALDYWR		MP_MPAv1_NewWF_BGP_1_A.csv
	MP_MPAv1_NewWF_BGP_1_A.csv	426	Meta-Protein 85	Metagenome unknown	root	1	2	ATB_B_contig011742, contig139363000056_4, contig139260000000_2	AYELGVNSFDSANVYER		MP_MPAv1_NewWF_BGP_1_A.csv
	MP_MPAv1_NewWF_BGP_1_A.csv	427	Meta-Protein 1039	Metagenome unknown	root	1	3	contig42239000023_2	NALIQYGEYLER		MP_MPAv1_NewWF_BGP_1_A.csv
	MP_MPAv1_NewWF_BGP_1_A.csv	428	Meta-Protein 1040	Metagenome unknown	root	1	2	contig7007000027_1	SYPISTYAIAGDYVK		MP_MPAv1_NewWF_BGP_1_A.csv
	MP_MPAv1_NewWF_BGP_1_A.csv	429	Meta-Protein 86	Metagenome unknown	root	4	14	contig3368000033_1, contig158000024_19, contig139433000067_12	NLASAVISHIAR, TLIGQTSGESYMLEFK, TLIGQTSGESYMLEFKNPGQKVTGQGNCFFAELAK		MP_MPAv1_NewWF_BGP_1_A.csv
	MP_MPAv1_NewWF_BGP_1_A.csv	430	Meta-Protein 1041	Metagenome unknown	root	1	3	contig138801000055_16	YGVTQALLDAAAK		MP_MPAv1_NewWF_BGP_1_A.csv
	MP_MPAv1_NewWF_BGP_1_A.csv	431	Meta-Protein 1042	SECB_LEPCP Protein-export protein SecB OS=Leptothrix cholodnii (strain ATCC 51168 / LMG 8142 / SP-6) GN=secB PE=3 SV=1	Leptothrix cholodnii SP-6	1	1	B1Y6N9	DEQDAAGEQPVFQIQRVYLK		MP_MPAv1_NewWF_BGP_1_A.csv
	MP_MPAv1_NewWF_BGP_1_A.csv	432	Meta-Protein 87	Metagenome unknown	root	1	2	contig3401000048_1, ATB_G30_contig005791	LGDAENPLLVSVR		MP_MPAv1_NewWF_BGP_1_A.csv
	MP_MPAv1_NewWF_BGP_1_A.csv	433	Meta-Protein 88	Metagenome unknown	root	8	29	contig402000023_2, contig369000070_5, contig1801000069_1	AGVWSVDPDIEIIGNYTGAFDDPAK, AGVWSVDPDIEIIGNYTGAFDDPAKGK, EGYDVVWAIGFLLEDAVKK, EHEGSFLVGVLAAETTK, FGIIDSGFDEEVHATELQNVLGVLFK, IASGDFVVPEFPSDVYK, TPSDYEPNLSMLARVDVGVFEGTLMLLDPNFK		MP_MPAv1_NewWF_BGP_1_A.csv
	MP_MPAv1_NewWF_BGP_1_A.csv	434	Meta-Protein 1043	Metagenome unknown	root	2	2	contig326000018_15	NIAGVEIIPANNINVYDLLKTLIVTAEANEVLYK		MP_MPAv1_NewWF_BGP_1_A.csv
	MP_MPAv1_NewWF_BGP_1_A.csv	435	Meta-Protein 1044	Metagenome unknown	root	1	1	contig14917000028_8	AAGINYGLVPMPR		MP_MPAv1_NewWF_BGP_1_A.csv
	MP_MPAv1_NewWF_BGP_1_A.csv	436	Meta-Protein 89	Metagenome unknown	root	3	4	contig12000036_13, contig139391000014_1, ATB_G5_contig054981, contig9053000056_1	GILEAVANALEQAGGDIEALK, LGGNALADINTFGRVGGNTILSGAAYNAVDPR		MP_MPAv1_NewWF_BGP_1_A.csv
	MP_MPAv1_NewWF_BGP_1_A.csv	437	Meta-Protein 90	Metagenome unknown	root	2	4	contig139443000030_3, contig126775000018_4	YFYQGAYDAIEPYIKYFYQGAYDALEPYIK		MP_MPAv1_NewWF_BGP_1_A.csv
	MP_MPAv1_NewWF_BGP_1_A.csv	438	Meta-Protein 91	MCRB_METBF Methyl-coenzyme M reductase subunit beta OS=Methanosarcina barkeri (strain Fusaro / DSM 804) GN=mcrB PE=1 SV=3	root	15	89	P07955, contig1068000023_32	AAQNVSSTLLYFNDILEK, AAQNVSSTLLYFNDILEKETGLPGCDYGK, AIEDGIISVDK, AIEDGIISVDKTAPSGYK, ANDVPMWNACAAVGTLAATMVNCGAGR, DGTIGTVIESVVR, ENGKDGTIGTVIESVVR, GLNYDLTGNAEAIAESVK, GLNYDLTGNAEAIAESVKNYVQVDEGDDTEVK, NIMANHVAAICNR, NYVQVDEGDDTEVKIVK, RAIEDGIISVDK, RAIEDGIISVDKTAPSGYK, RAIEDGIISVDKTAPSGYKFYKSVAVNLAGIQGALASGK		MP_MPAv1_NewWF_BGP_1_A.csv
	MP_MPAv1_NewWF_BGP_1_A.csv	439	Meta-Protein 1045	Metagenome unknown	root	1	1	contig5925000073_13	EIGQTIGEIVGGEAIHPSNPR		MP_MPAv1_NewWF_BGP_1_A.csv
	MP_MPAv1_NewWF_BGP_1_A.csv	440	Meta-Protein 92	Metagenome unknown	root	5	15	contig1093000005_72, contig139158000007_3	ALDLMQAAPVMK, ELGDVVLVDVIEGVPQGK, TANGGAEIVNFLK, TGSAFYAPSASAVTMAEAVLKDKVFGQAGVLDSAR		MP_MPAv1_NewWF_BGP_1_A.csv
	MP_MPAv1_NewWF_BGP_1_A.csv	441	Meta-Protein 1046	EFTU_HERAU Elongation factor Tu OS=Herpetosiphon aurantiacus GN=tuf PE=3 SV=1	Herpetosiphon aurantiacus	1	1	P42477	LLDEGRAGDNVGALLR		MP_MPAv1_NewWF_BGP_1_A.csv
	MP_MPAv1_NewWF_BGP_1_A.csv	442	Meta-Protein 1047	Metagenome unknown	root	1	4	contig583000026_6	EFGDALVGAYGGVR		MP_MPAv1_NewWF_BGP_1_A.csv
	MP_MPAv1_NewWF_BGP_1_A.csv	443	Meta-Protein 93	Metagenome unknown	root	4	10	ATB_B_contig138321, contig139053000050_14	HARVPVLVVR, IVTFAEDNNVDMIVVGSLGK, QILIATDGSETANEAADFAMEMFGCSGAKVYAVYVIDTTPYR		MP_MPAv1_NewWF_BGP_1_A.csv
	MP_MPAv1_NewWF_BGP_1_A.csv	444	Meta-Protein 94	Metagenome unknown	root	1	2	contig186000004_15, contig5452000031_1	MDVIGNNISNVGTTAFK		MP_MPAv1_NewWF_BGP_1_A.csv
	MP_MPAv1_NewWF_BGP_1_A.csv	445	Meta-Protein 1048	Metagenome unknown	root	1	1	contig138911000003_2	IAVLAVPADAAQDVANR		MP_MPAv1_NewWF_BGP_1_A.csv
	MP_MPAv1_NewWF_BGP_1_A.csv	446	Meta-Protein 95	Metagenome unknown	root	4	11	contig41385000052_1, contig139094000000_2	AQILQQAGTAMLAQANMK, IRDADMAAEIAELTK, LEHTINNLAVSEENLQAAESRNAQDGISLIQTAEGALNEVHSMLR		MP_MPAv1_NewWF_BGP_1_A.csv
	MP_MPAv1_NewWF_BGP_1_A.csv	447	Meta-Protein 1049	Metagenome unknown	root	1	1	contig33061000016_2	NKADDLFEYLPK		MP_MPAv1_NewWF_BGP_1_A.csv
	MP_MPAv1_NewWF_BGP_1_A.csv	448	Meta-Protein 1050	Metagenome unknown	root	1	1	contig372000006_4	ATDPTNIEATVAVGTEGLK		MP_MPAv1_NewWF_BGP_1_A.csv
	MP_MPAv1_NewWF_BGP_1_A.csv	449	Meta-Protein 96	Metagenome unknown	root	4	12	contig89460000056_2, ATB_S_contig127063, contig1692000023_1, contig139254000000_10, contig133298000026_1, contig1663000056_1, contig5521000007_2	DSLVGISYGALK, GYIKGYPDGTFAPK, ITNVEDTALYPNKLADFKDGATVANWAK		MP_MPAv1_NewWF_BGP_1_A.csv
	MP_MPAv1_NewWF_BGP_1_A.csv	450	Meta-Protein 97	Metagenome unknown	root	3	10	contig56000027_22, contig139379000069_4	GASIAQLAAEMGAK, GVQEGFDFSDVAAVEEAVYEATGVKIGLITGTVSQGEEEYQAAVK		MP_MPAv1_NewWF_BGP_1_A.csv
	MP_MPAv1_NewWF_BGP_1_A.csv	451	Meta-Protein 1051	WDR59_DROME GATOR complex protein WDR59 OS=Drosophila melanogaster GN=CG4705 PE=1 SV=3	Drosophila melanogaster	1	1	Q9VKK2	PPTETLRPGERGTAGGPGAGAPEQTYIVR		MP_MPAv1_NewWF_BGP_1_A.csv
	MP_MPAv1_NewWF_BGP_1_A.csv	452	Meta-Protein 1052	Metagenome unknown	root	1	1	contig490000039_11	AILPSPYGAFTR		MP_MPAv1_NewWF_BGP_1_A.csv
	MP_MPAv1_NewWF_BGP_1_A.csv	453	Meta-Protein 1053	Metagenome unknown	root	1	2	contig139685000013_10	YLDINVGPSSTEPVEAMK		MP_MPAv1_NewWF_BGP_1_A.csv
	MP_MPAv1_NewWF_BGP_1_A.csv	454	Meta-Protein 1054	Metagenome unknown	root	1	1	contig28716000053_1	AIFNEITDLQNR		MP_MPAv1_NewWF_BGP_1_A.csv
	MP_MPAv1_NewWF_BGP_1_A.csv	455	Meta-Protein 1055	Metagenome unknown	root	4	9	contig138480000005_6	DLDGDGEIDQWGIVDVR, MFETLLNSTTYVDDVR, VDDYQWTTQALSTTVIPANAKDPEALIALKVFLEGNELWAGK		MP_MPAv1_NewWF_BGP_1_A.csv
	MP_MPAv1_NewWF_BGP_1_A.csv	456	Meta-Protein 98	Metagenome unknown	root	2	2	contig33571000038_1, contig11930000034_2, contig292000065_6	LVDAGAYIPLEDLIEEHAPNIKKTEEQLALFRDPNWVR		MP_MPAv1_NewWF_BGP_1_A.csv
	MP_MPAv1_NewWF_BGP_1_A.csv	457	Meta-Protein 99	Metagenome unknown	root	1	2	contig16890000023_2, contig68000010_52	ADELSAIVFK		MP_MPAv1_NewWF_BGP_1_A.csv
	MP_MPAv1_NewWF_BGP_1_A.csv	458	Meta-Protein 100	Metagenome unknown	root	2	2	ATB_S_contig092942, contig59784000043_3, contig343000058_6	APVYAGDFIEVRAPVYAGDFLEVR		MP_MPAv1_NewWF_BGP_1_A.csv
	MP_MPAv1_NewWF_BGP_1_A.csv	459	Meta-Protein 1056	Metagenome unknown	root	1	1	contig76000012_1	EVVNQTLVDVAITCEK		MP_MPAv1_NewWF_BGP_1_A.csv
	MP_MPAv1_NewWF_BGP_1_A.csv	460	Meta-Protein 1057	Metagenome unknown	root	1	4	ATB_G5_contig042383	ATGPILEADAVSGVVAEFSVPATTVK		MP_MPAv1_NewWF_BGP_1_A.csv
	MP_MPAv1_NewWF_BGP_1_A.csv	461	Meta-Protein 1058	Metagenome unknown	root	2	6	contig2146000032_6	GTNQEETVVTYWVQNRINITTTDLEGLGEIIDAAVK		MP_MPAv1_NewWF_BGP_1_A.csv
	MP_MPAv1_NewWF_BGP_1_A.csv	462	Meta-Protein 1059	Metagenome unknown	root	1	1	contig139486000056_24	IGLEDVPIPK		MP_MPAv1_NewWF_BGP_1_A.csv
	MP_MPAv1_NewWF_BGP_1_A.csv	463	Meta-Protein 101	Metagenome unknown	root	1	2	contig9025000074_1, contig1212000046_1	FGGTSAVTSEMFAVNAPR		MP_MPAv1_NewWF_BGP_1_A.csv
	MP_MPAv1_NewWF_BGP_1_A.csv	464	Meta-Protein 1060	Metagenome unknown	root	3	3	contig547000039_2	EFDAAVMVDDAHASGVLGR, SQTPIIPVIVGDERTIVTAEHTQEDLQYALDAFEK		MP_MPAv1_NewWF_BGP_1_A.csv
	MP_MPAv1_NewWF_BGP_1_A.csv	465	Meta-Protein 1061	Metagenome unknown	root	1	1	contig96690000040_2	SEIITSSAPITSSIEVVNNR		MP_MPAv1_NewWF_BGP_1_A.csv
	MP_MPAv1_NewWF_BGP_1_A.csv	466	Meta-Protein 1062	Metagenome unknown	root	2	3	contig139628000068_52	FAPIVEISEPGTYELRLSFVVADADDLR		MP_MPAv1_NewWF_BGP_1_A.csv
	MP_MPAv1_NewWF_BGP_1_A.csv	467	Meta-Protein 1063	Metagenome unknown	root	1	1	contig41175000038_1	VAVTYPEIYAMQAR		MP_MPAv1_NewWF_BGP_1_A.csv
	MP_MPAv1_NewWF_BGP_1_A.csv	468	Meta-Protein 102	Metagenome unknown	root	1	2	contig1106000079_8, contig139371000022_5	LIEPTSGDIIFDGK		MP_MPAv1_NewWF_BGP_1_A.csv
	MP_MPAv1_NewWF_BGP_1_A.csv	469	Meta-Protein 1064	Metagenome unknown	root	1	4	contig39138000031_2	AADVCDVNSSFFHIMQR		MP_MPAv1_NewWF_BGP_1_A.csv
	MP_MPAv1_NewWF_BGP_1_A.csv	470	Meta-Protein 1065	Metagenome unknown	root	1	1	contig179000025_3	TPVVVEEAPGFIVNR		MP_MPAv1_NewWF_BGP_1_A.csv
	MP_MPAv1_NewWF_BGP_1_A.csv	471	Meta-Protein 1066	Metagenome unknown	root	1	1	contig47624000053_3	LVSWYDNEWGYSCK		MP_MPAv1_NewWF_BGP_1_A.csv
	MP_MPAv1_NewWF_BGP_1_A.csv	472	Meta-Protein 1067	Metagenome unknown	root	1	1	contig2934000010_6	LTGIPEEDLYAVAR		MP_MPAv1_NewWF_BGP_1_A.csv
	MP_MPAv1_NewWF_BGP_1_A.csv	473	Meta-Protein 1068	Metagenome unknown	root	1	1	contig139189000057_4	MTVDRVDEIVEEHLLK		MP_MPAv1_NewWF_BGP_1_A.csv
	MP_MPAv1_NewWF_BGP_1_A.csv	474	Meta-Protein 103	Metagenome unknown	root	3	6	contig186000026_4, contig10499000073_2	ACEMLADAGIPLGNQAVLLR, AYFNATEEEWNDWRGKTPMLPEYVISHGR		MP_MPAv1_NewWF_BGP_1_A.csv
	MP_MPAv1_NewWF_BGP_1_A.csv	475	Meta-Protein 104	Metagenome unknown	root	2	5	contig42654000032_1, ATB_G30_contig086533	LGEEPSPVIVELYVAKNFITPQFTIR		MP_MPAv1_NewWF_BGP_1_A.csv
	MP_MPAv1_NewWF_BGP_1_A.csv	476	Meta-Protein 105	Metagenome unknown	root	1	2	contig32287000038_1, contig26000057_1	LGWMGQLEVGR		MP_MPAv1_NewWF_BGP_1_A.csv
	MP_MPAv1_NewWF_BGP_1_A.csv	477	Meta-Protein 1069	Metagenome unknown	root	2	7	contig4073000068_1	VNPSIIIASGFDKVNPSIIIASGFDKLDPYAK		MP_MPAv1_NewWF_BGP_1_A.csv
	MP_MPAv1_NewWF_BGP_1_A.csv	478	Meta-Protein 106	Metagenome unknown	root	8	33	contig6398000031_3, contig9673000046_2, contig139798000078_57, contig6402000044_1	EEFPLITGQDCDIANTK, FFYQGAIDQIMPYIEAGK, MDNLIAANYAGGQK, NIIAGYQAMSVFK, TDPVNIEITAGSPDDNNAR, VVVPSGQIAFEQVATLEWSSER, YFYQGAIDQIMPYIEAGKYLVEALDLDNRTDPVNIEITAGSPDDNNAR		MP_MPAv1_NewWF_BGP_1_A.csv
	MP_MPAv1_NewWF_BGP_1_A.csv	479	Meta-Protein 107	Metagenome unknown	root	4	11	contig139304000010_4, contig584000064_2	GALLDLKPLIER, ILQQLTLDDQGR, NPDIEVVMELAEWDDYWTKSIEGFSWDVVGMPWGPK		MP_MPAv1_NewWF_BGP_1_A.csv
	MP_MPAv1_NewWF_BGP_1_A.csv	480	Meta-Protein 1070	Metagenome unknown	root	1	1	contig392000066_3	YIPQIEEYVVPK		MP_MPAv1_NewWF_BGP_1_A.csv
	MP_MPAv1_NewWF_BGP_1_A.csv	481	Meta-Protein 108	MER_METTH 5,10-methylenetetrahydromethanopterin reductase OS=Methanothermobacter thermautotrophicus (strain ATCC 29096 / DSM 1053 / JCM 10044 / NBRC 100330 / Delta H) GN=mer PE=1 SV=1	root	5	11	O27784, contig1153000060_58, Q50744, contig483000000_26	IEALGEMGVTQYVAGSPIGPDKEK, IEALGEMGVTQYVAGSPLGPDKEK, NVYETLAMIAAGTETIK, SPAITASAITTLDELSNGRTAGGFSDGALINASNPK		MP_MPAv1_NewWF_BGP_1_A.csv
	MP_MPAv1_NewWF_BGP_1_A.csv	482	Meta-Protein 1071	Metagenome unknown	root	3	5	contig139218000074_26	LNQLFEDFMPMEEWGGGR, MENGVLTITLPKTFSGPACWDPFEEIRR		MP_MPAv1_NewWF_BGP_1_A.csv
	MP_MPAv1_NewWF_BGP_1_A.csv	483	Meta-Protein 109	Metagenome unknown	root	3	5	contig139684000014_66, contig17000010_1	GIYHYASGTIPTNIK, GLGSAATNSSAIYGIYHQGTAKMTNYFNNNNIFLK		MP_MPAv1_NewWF_BGP_1_A.csv
	MP_MPAv1_NewWF_BGP_1_A.csv	484	Meta-Protein 1072	GL52_ORYSJ Germin-like protein 5-1 OS=Oryza sativa subsp. japonica GN=Os05g0277500 PE=2 SV=1	Oryza sativa Japonica Group	1	3	Q6I544	TISAGDVFVFPR		MP_MPAv1_NewWF_BGP_1_A.csv
	MP_MPAv1_NewWF_BGP_1_A.csv	485	Meta-Protein 1073	Metagenome unknown	root	1	7	contig7628000065_1	ATYALADGVDTSFEVGYK		MP_MPAv1_NewWF_BGP_1_A.csv
	MP_MPAv1_NewWF_BGP_1_A.csv	486	Meta-Protein 1074	Metagenome unknown	root	1	1	contig60457000033_2	TAELSAFYQSGIIAR		MP_MPAv1_NewWF_BGP_1_A.csv
	MP_MPAv1_NewWF_BGP_1_A.csv	487	Meta-Protein 1075	Metagenome unknown	root	1	2	contig319000005_35	AALAGTPAQQVITNAIEPK		MP_MPAv1_NewWF_BGP_1_A.csv
	MP_MPAv1_NewWF_BGP_1_A.csv	488	Meta-Protein 110	Metagenome unknown	root	6	11	contig71746000006_4, contig35974000023_3, contig139724000004_11	AIDLDAQDEFMTVK, LICASGPTGGHLIRPSDGATPK, LICASGPTGGHLIRPSDGVTPK, TFPTLDCSQCILTPK, TSLLEDLIPKVGTIILATGYDIFPIEEK		MP_MPAv1_NewWF_BGP_1_A.csv
	MP_MPAv1_NewWF_BGP_1_A.csv	489	Meta-Protein 1076	Metagenome unknown	root	1	1	contig244000018_8	LISEDTGGDWSAAANAFTK		MP_MPAv1_NewWF_BGP_1_A.csv
	MP_MPAv1_NewWF_BGP_1_A.csv	490	Meta-Protein 1077	Metagenome unknown	root	1	1	contig138994000045_1	ALGDLNEFYAVR		MP_MPAv1_NewWF_BGP_1_A.csv
	MP_MPAv1_NewWF_BGP_1_A.csv	491	Meta-Protein 1078	Metagenome unknown	root	1	1	contig415000033_3	NMFETVLNVEK		MP_MPAv1_NewWF_BGP_1_A.csv
	MP_MPAv1_NewWF_BGP_1_A.csv	492	Meta-Protein 1079	Metagenome unknown	root	1	1	contig138849000055_3	NGAGYDVVFYPQYETQIK		MP_MPAv1_NewWF_BGP_1_A.csv
	MP_MPAv1_NewWF_BGP_1_A.csv	493	Meta-Protein 111	Metagenome unknown	root	2	1	contig2055000012_2, contig8503000046_1	MIINDIIARMIINDILAR		MP_MPAv1_NewWF_BGP_1_A.csv
	MP_MPAv1_NewWF_BGP_1_A.csv	494	Meta-Protein 1080	Metagenome unknown	root	1	2	contig139803000041_2	APAAFVEPSEFNEVMK		MP_MPAv1_NewWF_BGP_1_A.csv
	MP_MPAv1_NewWF_BGP_1_A.csv	495	Meta-Protein 1081	Metagenome unknown	root	2	4	contig18900000074_1	NIEDIAFIWNKVAAWWDMTPQGGTPGGDR		MP_MPAv1_NewWF_BGP_1_A.csv
	MP_MPAv1_NewWF_BGP_1_A.csv	496	Meta-Protein 1082	Metagenome unknown	root	2	2	contig30218000077_1	IVKPGGTISNINYFGEGDTIPIPRNGPIDEQIMDLTGGK		MP_MPAv1_NewWF_BGP_1_A.csv
	MP_MPAv1_NewWF_BGP_1_A.csv	497	Meta-Protein 112	ACDG2_METMA Acetyl-CoA decarbonylase/synthase complex subunit gamma 2 OS=Methanosarcina mazei (strain ATCC BAA-159 / DSM 3647 / Goe1 / Go1 / JCM 11833 / OCM 88) GN=cdhE2 PE=3 SV=1	root	18	66	Q8PV87, contig5383000018_26, Q8TH44, Q8PZ09, Q50539, Q9C4Z0	AGLEVAKDKNPLIYAANK, AGLEVAKDKNPLIYAANKDNWK, AGLEVAKDKNPLLYAANK, AGLEVAKDKNPLLYAANKDNWK, DKNPLIYAANKDNWK, DKNPLLYAANKDNWK, DVTHNTVIIPGLAAR, EVGELALEYNVPVVVSAINDLDALK, KDVTHNTVIIPGLAAR, LAELDRLLAPEIR, MFFDVTDTMDEAALVER, MKINSPLEAYK, NLLLDGVAIR, SVSNDPAKFAAAVK, TFAEAGIKDIVLDPGTSPSGQGLK, VAEVGIPMIFCSFNPAVLK, VMVGPMDSGRLPGWFEKYLPQTNCGECGEATCMAFASK		MP_MPAv1_NewWF_BGP_1_A.csv
	MP_MPAv1_NewWF_BGP_1_A.csv	498	Meta-Protein 1083	Metagenome unknown	root	1	1	contig139381000077_2	MEELWGVTGLAK		MP_MPAv1_NewWF_BGP_1_A.csv
	MP_MPAv1_NewWF_BGP_1_A.csv	499	Meta-Protein 1084	Metagenome unknown	root	3	8	contig2084000015_2	EGDIVDQVMSLTK, IGNVNYLGSGESVLIPRNNMILGHEAVGEVVEVGSLVK		MP_MPAv1_NewWF_BGP_1_A.csv
	MP_MPAv1_NewWF_BGP_1_A.csv	500	Meta-Protein 113	Metagenome unknown	root	2	1	contig1589000038_1, contig1950000023_8	GITQEELADALEVSRGLTQEELADALEVSR		MP_MPAv1_NewWF_BGP_1_A.csv
	MP_MPAv1_NewWF_BGP_1_A.csv	501	Meta-Protein 1085	Metagenome unknown	root	1	1	contig42743000002_11	FSALNPEPIGYIADNPTK		MP_MPAv1_NewWF_BGP_1_A.csv
	MP_MPAv1_NewWF_BGP_1_A.csv	502	Meta-Protein 114	Metagenome unknown	root	2	2	contig5994000012_8, contig47672000035_3, contig139188000057_5	HTDTAQVADIHLQVKILEVENACIIGSTVFHR		MP_MPAv1_NewWF_BGP_1_A.csv
	MP_MPAv1_NewWF_BGP_1_A.csv	503	Meta-Protein 1086	Metagenome unknown	root	2	3	contig479000012_2	GILTESEAQELVDQFIIKVALYGVDTLIAEK		MP_MPAv1_NewWF_BGP_1_A.csv
	MP_MPAv1_NewWF_BGP_1_A.csv	504	Meta-Protein 1087	Metagenome unknown	root	2	2	contig1343000027_17	AIFGIIESGDAVARVNLEAAGELIGLR		MP_MPAv1_NewWF_BGP_1_A.csv
	MP_MPAv1_NewWF_BGP_1_A.csv	505	Meta-Protein 1088	Metagenome unknown	root	1	1	contig4055000011_3	ASMPKPENESDYLYR		MP_MPAv1_NewWF_BGP_1_A.csv
	MP_MPAv1_NewWF_BGP_1_A.csv	506	Meta-Protein 115	Metagenome unknown	root	2	1	contig139240000058_10, contig130665000036_1	LQLINGQIDYITRLQLINGQLDYITR		MP_MPAv1_NewWF_BGP_1_A.csv
	MP_MPAv1_NewWF_BGP_1_A.csv	507	Meta-Protein 116	Metagenome unknown	root	4	7	contig19350000075_2, contig16873000014_2	NLESENIVALADVDWK, QVCDWIYDGQIGEVTR, SIDAVVVATADHTHALIAADAITMGKVETFTDRPIWPQGLNRPAK		MP_MPAv1_NewWF_BGP_1_A.csv
	MP_MPAv1_NewWF_BGP_1_A.csv	508	Meta-Protein 1089	Metagenome unknown	root	1	2	contig8863000055_2	SAPFSLGIIGR		MP_MPAv1_NewWF_BGP_1_A.csv
	MP_MPAv1_NewWF_BGP_1_A.csv	509	Meta-Protein 1090	Metagenome unknown	root	1	1	contig77000039_16	VGIFGLSTPDTVIVTHPK		MP_MPAv1_NewWF_BGP_1_A.csv
	MP_MPAv1_NewWF_BGP_1_A.csv	510	Meta-Protein 117	Metagenome unknown	root	2	1	contig139946000046_25, contig139008000003_11	IAMVPQASMNSLNPVIRIAMVPQASMNSLNPVLR		MP_MPAv1_NewWF_BGP_1_A.csv
	MP_MPAv1_NewWF_BGP_1_A.csv	511	Meta-Protein 118	Metagenome unknown	root	11	26	contig3030000011_78, contig977000022_5, contig1452000001_8	AKAVANALTNEYGIDSSR, AVANALTNEYGIDSSR, GQQVSVYNTAEYMK, IDKGQQVSVYNTAEYMK, INSYKIDKGQQVSVYNTAEYMK, LGWMGQIEIGR, LGWMGQLEIGR, NQNQSLTYNLGLINNFR, QEFTPAELMDYNLINDLNSQINR, QTGTPAYNLALSEKWNSPVWGTR		MP_MPAv1_NewWF_BGP_1_A.csv
	MP_MPAv1_NewWF_BGP_1_A.csv	512	Meta-Protein 119	Metagenome unknown	root	7	9	ATB_S_contig005441, contig2550000034_5, contig1128000023_15	AAEASIIEVYGK, LQADYSSKNDYTAYWR, NWAFAGNDKFDGYDDPDSNVVK, QHINSALTIDGIHQIK, QLTVEVPIGDLGK, QLTVEVPLGDLGKYEAGPTLTAFYR		MP_MPAv1_NewWF_BGP_1_A.csv
	MP_MPAv1_NewWF_BGP_1_A.csv	513	Meta-Protein 1091	Metagenome unknown	root	1	1	contig8473000055_2	MALVPQASMNSLNPVIR		MP_MPAv1_NewWF_BGP_1_A.csv
	MP_MPAv1_NewWF_BGP_1_A.csv	514	Meta-Protein 1092	Metagenome unknown	root	1	3	contig2282000029_24	YGYSDLEPYISEEQLR		MP_MPAv1_NewWF_BGP_1_A.csv
	MP_MPAv1_NewWF_BGP_1_A.csv	515	Meta-Protein 120	Metagenome unknown	root	3	12	contig100381000063_1, contig46000033_18, contig109257000025_3	ATADTDGDGVIDQWGYTSR, LLFTMNEPAAIEALEFARLTCFGVLPLTAK		MP_MPAv1_NewWF_BGP_1_A.csv
	MP_MPAv1_NewWF_BGP_1_A.csv	516	Meta-Protein 121	Metagenome unknown	root	15	62	contig50389000032_2, contig98604000012_1, contig43498000040_2, contig53608000063_1	ASDNWFMGLAGGIDTYNMK, ASDNWFMGLAGGIDTYNMKDFDDFGDR, ASDNWFMGLGGGINTYNMK, DFDDFGDRIGWIGQLTFGK, DWFEKPNSDNDLFK, FAIDAGEPVIDWEKDVK, FAIDAGEPVIDWENDVK, FAVDLGEPVTDYKNDVK, GQNQSLTLNAGIINNFR, HQHVSIYNTAEYLK, HQHVSIYNTAEYLKQNPDAK, IDRHQHVSIYNTAEYLK, QDFTPAELMDYSLINDLNSQINR, QNQSLTLNGGIINNFRWVSPIWGVR		MP_MPAv1_NewWF_BGP_1_A.csv
	MP_MPAv1_NewWF_BGP_1_A.csv	517	Meta-Protein 122	Metagenome unknown	Methanosarcina	1	4	contig139803000041_8, Q9Y8K0, P80651, Q8TTZ9	EFQQFEFGSGLNASNSGNIVR		MP_MPAv1_NewWF_BGP_1_A.csv
	MP_MPAv1_NewWF_BGP_1_A.csv	518	Meta-Protein 1093	Metagenome unknown	root	1	1	contig966000061_6	IVALTGMITGIAASLSMAASEYLSTK		MP_MPAv1_NewWF_BGP_1_A.csv
	MP_MPAv1_NewWF_BGP_1_A.csv	519	Meta-Protein 123	G3P_CLOPA Glyceraldehyde-3-phosphate dehydrogenase OS=Clostridium pasteurianum GN=gap PE=1 SV=1	root	7	17	Q59309, contig166000050_1	INDLTDPAMLAHLLK, TVSWYDNEMSYTSQLVR, VGTMTTVHGYTGDQMTLDGPHR, VGTMTTVHGYTGDQMTLDGPHRK, VPVPTGSLTELVSVLDK, VPVPTGSLTELVSVLDKKVSAERDPEQIDWANDGVEIVLEATGFFATK		MP_MPAv1_NewWF_BGP_1_A.csv
	MP_MPAv1_NewWF_BGP_1_A.csv	520	Meta-Protein 124	Metagenome unknown	root	32	153	contig947000024_5, contig139724000004_5, contig11119000027_2, contig139433000016_10, contig27951000013_1	AKFKDTIDLYDDAGK, AKFNDTIDLYDDTGK, AKFNDTIDLYDDTGKLLK, ELDLDIVGNKDAVISK, EMDLDIVGNKDAVIGK, EMVQVQEGDDTNIREFSGGK, ENGATGTIGTVVQSLVER, FKDTIDLYDDAGK, FNDTIDLYDDTGK, FNDTIDLYDDTGKLLK, GALVTSILNIPQNNEGLGYALR, GAQVTSILSIPQNNEGLGYALR, GAVWGAYPHTMDMK, GGYFQYYDTK, HAAGVAIPCVVAAAALDAGTQMFSPESTSK, IKEMVQVQEGDDTKIR, IKEMVQVQEGDDTKIREFSGGK, IREMVQVQEGDDTNIR, IREMVQVQEGDDTNIREFSGGK, IYADTYGKVDVFNKPIQQIAQGV, IY…		MP_MPAv1_NewWF_BGP_1_A.csv
	MP_MPAv1_NewWF_BGP_1_A.csv	521	Meta-Protein 1094	Metagenome unknown	root	1	1	contig1676000006_3	QIAFNAGLEGSIIAEK		MP_MPAv1_NewWF_BGP_1_A.csv
	MP_MPAv1_NewWF_BGP_1_A.csv	522	Meta-Protein 125	Metagenome unknown	root	1	2	contig1740000061_6, contig12333000037_56	YGVSQAILDAVAR		MP_MPAv1_NewWF_BGP_1_A.csv
	MP_MPAv1_NewWF_BGP_1_A.csv	523	Meta-Protein 1095	Metagenome unknown	root	1	1	contig139868000029_13	LANEIVDPLLELGKK		MP_MPAv1_NewWF_BGP_1_A.csv
	MP_MPAv1_NewWF_BGP_1_A.csv	524	Meta-Protein 1096	Metagenome unknown	root	1	1	contig36104000057_1	ALTQYEQLVEDNLGPAK		MP_MPAv1_NewWF_BGP_1_A.csv
	MP_MPAv1_NewWF_BGP_1_A.csv	525	Meta-Protein 1097	Metagenome unknown	root	1	1	contig1660000018_2	LVAEAIDALDIR		MP_MPAv1_NewWF_BGP_1_A.csv
	MP_MPAv1_NewWF_BGP_1_A.csv	526	Meta-Protein 1098	Metagenome unknown	root	1	1	contig580000049_36	LGLALLDLEDPRK		MP_MPAv1_NewWF_BGP_1_A.csv
	MP_MPAv1_NewWF_BGP_1_A.csv	527	Meta-Protein 1099	RIMP_ACISJ Ribosome maturation factor RimP OS=Acidovorax sp. (strain JS42) GN=rimP PE=3 SV=2	Acidovorax sp. JS42	1	1	A1W8Z6	QLQFALEVEGVDYTRLEVSSPGIDR		MP_MPAv1_NewWF_BGP_1_A.csv
	MP_MPAv1_NewWF_BGP_1_A.csv	528	Meta-Protein 1100	Metagenome unknown	root	1	1	contig138787000051_12	NLGDQGYDAISILR		MP_MPAv1_NewWF_BGP_1_A.csv
	MP_MPAv1_NewWF_BGP_1_A.csv	529	Meta-Protein 1101	Metagenome unknown	root	7	100	ATB_B_contig103492	AKGSVTQTIADENENVIGLDVWYR, ARLEFDVVDVADVAIDFEPDNNIR, DATVISGTVTWTEAAIK, GSVTQTIADENENVIGLDVWYR, LEFDVVDVADVAIDFEPDNNIR, TDATVISGTVTWTEAAIKTFVELNDIVEGFDFGLAYAR		MP_MPAv1_NewWF_BGP_1_A.csv
	MP_MPAv1_NewWF_BGP_1_A.csv	530	Meta-Protein 1102	Metagenome unknown	root	1	4	contig491000078_17	MEVASELGVPLTQGYNGNLTSR		MP_MPAv1_NewWF_BGP_1_A.csv
	MP_MPAv1_NewWF_BGP_1_A.csv	531	Meta-Protein 126	Metagenome unknown	root	1	2	contig6768000044_2, contig436000076_9	DLAPTDAIMAMR		MP_MPAv1_NewWF_BGP_1_A.csv
	MP_MPAv1_NewWF_BGP_1_A.csv	532	Meta-Protein 1103	Metagenome unknown	root	3	11	contig251000078_1	DTYTLWGTNYYDYEK, INPSLIIASGFDKINPSLIIASGFDKLDPYAR		MP_MPAv1_NewWF_BGP_1_A.csv
	MP_MPAv1_NewWF_BGP_1_A.csv	533	Meta-Protein 127	Metagenome unknown	root	9	20	contig5461000037_1, contig4289000026_2, contig4289000026_1	ASAQTIIDDMFGY, DLLANEGLEDPYELLAR, DTDGDGIIDQYGLSNMDPK, GALFPVNEILPDEYFEALPK, IASPTALASGGEAEWGAGK, QWVDWVLVDK, VIVGWGDVGDTALNR, VLVGWGDVGDTALNRVYWSLDEPEGVAGLR		MP_MPAv1_NewWF_BGP_1_A.csv
	MP_MPAv1_NewWF_BGP_1_A.csv	534	Meta-Protein 128	Metagenome unknown	root	1	1	contig30234000050_18, contig64450000045_1	STYLIDEADFISCSK		MP_MPAv1_NewWF_BGP_1_A.csv
	MP_MPAv1_NewWF_BGP_1_A.csv	535	Meta-Protein 1104	Metagenome unknown	root	1	2	contig11775000008_2	AFFELDLSK		MP_MPAv1_NewWF_BGP_1_A.csv
	MP_MPAv1_NewWF_BGP_1_A.csv	536	Meta-Protein 1105	Metagenome unknown	root	1	3	contig139238000016_2	GVLDEAMEQAIAR		MP_MPAv1_NewWF_BGP_1_A.csv
	MP_MPAv1_NewWF_BGP_1_A.csv	537	Meta-Protein 1106	Metagenome unknown	root	1	3	contig550000031_5	AALDALLEAAR		MP_MPAv1_NewWF_BGP_1_A.csv
	MP_MPAv1_NewWF_BGP_1_A.csv	538	Meta-Protein 1107	Metagenome unknown	root	1	1	contig1805000014_1	ANGKDVPHPITLEK		MP_MPAv1_NewWF_BGP_1_A.csv
	MP_MPAv1_NewWF_BGP_1_A.csv	539	Meta-Protein 1108	Metagenome unknown	root	1	2	contig1374000032_83	LTAELGDKVQLVGDDLFVTNTER		MP_MPAv1_NewWF_BGP_1_A.csv
	MP_MPAv1_NewWF_BGP_1_A.csv	540	Meta-Protein 1109	Metagenome unknown	root	2	9	contig462000051_1	ASTNNSFYIDYIESTYGTSVTGKFKFEDPETVPTDVILPQQEVNCGSPAAVR		MP_MPAv1_NewWF_BGP_1_A.csv
	MP_MPAv1_NewWF_BGP_1_A.csv	541	Meta-Protein 129	Metagenome unknown	root	8	11	contig21000052_6, contig139628000068_112, Q464Z4, Q8PUR8, Q8TRC4, contig37978000064_3	FDTDKYYFTVVDCPGHR, IPVEDAYTISGIGTVPVGR, KGDKVIFMPGGASGEVK, LMYDAGAVPTHIIEK, NMITGASQADAAVLVVAAPDGVMAQTK, SIEMHHEEIPQALPGDNIGWNVR, YKEVVEQVSGILKYKEVVEQVSGLLK		MP_MPAv1_NewWF_BGP_1_A.csv
	MP_MPAv1_NewWF_BGP_1_A.csv	542	Meta-Protein 130	Metagenome unknown	root	2	3	ATB_S_contig035833, ATB_G5_contig023863	DITGAVLSPFDAYLVCRYGIETTFVDVSDLEAVRR		MP_MPAv1_NewWF_BGP_1_A.csv
	MP_MPAv1_NewWF_BGP_1_A.csv	543	Meta-Protein 131	Metagenome unknown	root	15	79	contig947000024_2, contig139433000016_7, contig139724000004_2, contig11119000027_5, contig12701000078_4	AHTTIFHSLGDVAFRDDQEYIEYVQR, APGAAYPTAHPPLAEQQEPDCPIR, APGAAYPTAHPPLAEQQEPDCPIRK, AVEIGKPMDEKWLK, DLINTELLDPAR, DVTDEDIVLILGHR, DVTDEDIVLLLGHR, DVTDEDIVMILGHR, ELINTELLDPAR, LAENGMMFDMLQR, LDENGMMFDMLQR, LDENGMMFDMLQRR, LRDVTDEDIVLLLGHR, MRDVTDEDIVMILGHRSVLGDDGIVR		MP_MPAv1_NewWF_BGP_1_A.csv
	MP_MPAv1_NewWF_BGP_1_A.csv	544	Meta-Protein 132	Metagenome unknown	root	9	19	contig138985000072_46, contig303000037_3, contig1689000059_2	ENPIYSEDFTTMTVK, FVLPFLQPTGR, GLNVFHSQYWKPIGEK, HVFEQVEDPLSFQFNPPVGTGPYK, IFNSNLPFEMAEEAK, IFNSNLPFEMAEEAR, MLPYLEEYTLEIDGEEYK, VYKTDDYTVVFELTQPNSRWVNEEIDYFIDQMEQTDYSDPK		MP_MPAv1_NewWF_BGP_1_A.csv
	MP_MPAv1_NewWF_BGP_1_A.csv	545	Meta-Protein 1110	Metagenome unknown	root	2	3	contig188000043_6	ELAPEMEILPIRIVAVAFDSDPEEIQALR		MP_MPAv1_NewWF_BGP_1_A.csv
	MP_MPAv1_NewWF_BGP_1_A.csv	546	Meta-Protein 1111	Metagenome unknown	root	1	1	contig1177000034_4	IQVVSPVIGSVTEETAFK		MP_MPAv1_NewWF_BGP_1_A.csv
	MP_MPAv1_NewWF_BGP_1_A.csv	547	Meta-Protein 1112	Metagenome unknown	root	1	1	ATB_S_contig065296	AFTVILPLK		MP_MPAv1_NewWF_BGP_1_A.csv
	MP_MPAv1_NewWF_BGP_1_A.csv	548	Meta-Protein 1113	Metagenome unknown	root	1	1	contig9083000066_3	TGKFGCVIIDSVSALLPTAEAEAEMSNQAMGLQSR		MP_MPAv1_NewWF_BGP_1_A.csv
	MP_MPAv1_NewWF_BGP_1_A.csv	549	Meta-Protein 1114	Metagenome unknown	root	1	2	contig182000041_44	EIENYFGLETLR		MP_MPAv1_NewWF_BGP_1_A.csv
	MP_MPAv1_NewWF_BGP_1_A.csv	550	Meta-Protein 133	Metagenome unknown	root	1	4	ATB_B_contig099781, contig2284000003_1	ILFLEGRPIVSNLSEIR		MP_MPAv1_NewWF_BGP_1_A.csv
	MP_MPAv1_NewWF_BGP_1_A.csv	551	Meta-Protein 1115	Metagenome unknown	root	1	2	contig140003000046_30	LNDFLNLAPEVR		MP_MPAv1_NewWF_BGP_1_A.csv
	MP_MPAv1_NewWF_BGP_1_A.csv	552	Meta-Protein 134	Metagenome unknown	root	9	21	contig138551000059_1, contig140087000023_22	APGPWANDLLVDVSAK, AYDFTLNQAVNVYLADEDTKEGAR, DKDWLYEVK, IEDPFKYALILK, KRDDFDDVIAVSLNTK, LPVDFSPYIAK, NIAYVGEGKPIDAIWKR, VNFDYDTNFIKDSRVSDALKVWAGHR		MP_MPAv1_NewWF_BGP_1_A.csv
	MP_MPAv1_NewWF_BGP_1_A.csv	553	Meta-Protein 1116	Metagenome unknown	root	1	1	contig139839000013_5	AGYINPDAAVLDEVGPYSAVK		MP_MPAv1_NewWF_BGP_1_A.csv
	MP_MPAv1_NewWF_BGP_1_A.csv	554	Meta-Protein 1117	Metagenome unknown	root	1	1	contig117465000071_2	IVAVSAIDNLVKGASGQAIQNMNLMCGLK		MP_MPAv1_NewWF_BGP_1_A.csv
	MP_MPAv1_NewWF_BGP_1_A.csv	555	Meta-Protein 1118	Metagenome unknown	root	1	1	contig366000036_1	IWDVSTGEVLYTYPGR		MP_MPAv1_NewWF_BGP_1_A.csv
	MP_MPAv1_NewWF_BGP_1_A.csv	556	Meta-Protein 135	Metagenome unknown	root	3	5	ATB_G30_contig069762, ATB_S_contig141421, contig139284000077_1	EITELVFPAAVR, GFNYLDAIPYDRGVAILEAPPEEAYLSLWR		MP_MPAv1_NewWF_BGP_1_A.csv
	MP_MPAv1_NewWF_BGP_1_A.csv	557	Meta-Protein 136	Metagenome unknown	root	3	9	contig59678000020_1, contig139147000073_33	GIVDPESFVIDFDQYIQK, LASGTVLGLFDQRWSFNKANEALHQQGK		MP_MPAv1_NewWF_BGP_1_A.csv
	MP_MPAv1_NewWF_BGP_1_A.csv	558	Meta-Protein 137	Metagenome unknown	root	1	1	contig12701000078_7, contig12764000036_10	NGATGTIGTVVQSLVER		MP_MPAv1_NewWF_BGP_1_A.csv
	MP_MPAv1_NewWF_BGP_1_A.csv	559	Meta-Protein 1119	Metagenome unknown	root	1	1	contig139396000068_5	EVLLLEEMVDAAMQVMDLVQGHDAESLR		MP_MPAv1_NewWF_BGP_1_A.csv
	MP_MPAv1_NewWF_BGP_1_A.csv	560	Meta-Protein 138	Metagenome unknown	root	7	14	contig1548000039_3, contig139929000023_4, contig2634000064_1, ATB_S_contig009022	DKPVLDVQPLSIGGKENPAR, GFTTNFEDLTGLR, GGTSFMEDYVYHLDPAGQR, LGEIYYHLAR, MVVNEVEVVDPPADLPK, MVVNEVEVVDPPADLPKLPVARSLGERPEIPVTVVYKPVMTDSSSIRR		MP_MPAv1_NewWF_BGP_1_A.csv
	MP_MPAv1_NewWF_BGP_1_A.csv	561	Meta-Protein 139	Metagenome unknown	root	1	2	contig867000069_10, contig139565000026_9	LLITQYGGPDGELSAALR		MP_MPAv1_NewWF_BGP_1_A.csv
	MP_MPAv1_NewWF_BGP_1_A.csv	562	Meta-Protein 140	Metagenome unknown	root	2	2	contig139040000047_10, contig139527000026_5	LIPACDVSEQISLASKNLTLFLYPDDSDDAGR		MP_MPAv1_NewWF_BGP_1_A.csv
	MP_MPAv1_NewWF_BGP_1_A.csv	563	Meta-Protein 1120	Metagenome unknown	root	1	1	contig890000000_2	LTVMGLDVEVVPAYTVGK		MP_MPAv1_NewWF_BGP_1_A.csv
	MP_MPAv1_NewWF_BGP_1_A.csv	564	Meta-Protein 1121	Metagenome unknown	root	1	3	contig139803000041_6	DAHAVVGTGLLPSAEELQ		MP_MPAv1_NewWF_BGP_1_A.csv
	MP_MPAv1_NewWF_BGP_1_A.csv	565	Meta-Protein 1122	SDCG8_DANRE Serologically defined colon cancer antigen 8 homolog OS=Danio rerio GN=Sdccag8 PE=3 SV=2	Danio rerio	1	1	B8JK76	EELMQTLSSLSQK		MP_MPAv1_NewWF_BGP_1_A.csv
	MP_MPAv1_NewWF_BGP_1_A.csv	566	Meta-Protein 141	Metagenome unknown	root	5	9	contig51167000006_2, contig1615000002_7, ATB_G5_contig099002	LLDPDLVAVLGAVDK, LLDPDLVAVLGAVDKQVAR, NTVTDGGGQDIFSDKVFLLSR, NTVTDGGGQDLFSDKVFLLSRQWLNSEASTFEWVSK		MP_MPAv1_NewWF_BGP_1_A.csv
	MP_MPAv1_NewWF_BGP_1_A.csv	567	Meta-Protein 1123	Metagenome unknown	root	1	2	contig130000028_25	GADMIANVPIQSLVR		MP_MPAv1_NewWF_BGP_1_A.csv
	MP_MPAv1_NewWF_BGP_1_A.csv	568	Meta-Protein 142	Metagenome unknown	root	1	2	contig139252000057_18, contig139074000039_35	IEGFVVFVPGTK		MP_MPAv1_NewWF_BGP_1_A.csv
	MP_MPAv1_NewWF_BGP_1_A.csv	569	Meta-Protein 143	Metagenome unknown	root	2	1	contig5683000052_4, Q97I51	FNDIKEGDVIEAFQMVKFNDIKEGDVLEAFQMVK		MP_MPAv1_NewWF_BGP_1_A.csv
	MP_MPAv1_NewWF_BGP_1_A.csv	570	Meta-Protein 1124	Metagenome unknown	root	1	3	contig139421000027_2	LDSEQAVFNLVYNSMAAGAK		MP_MPAv1_NewWF_BGP_1_A.csv
	MP_MPAv1_NewWF_BGP_1_A.csv	571	Meta-Protein 144	Metagenome unknown	root	1	3	contig139189000057_3, contig3570000055_1	ASLGEEFGLPVGTDVTGR		MP_MPAv1_NewWF_BGP_1_A.csv
	MP_MPAv1_NewWF_BGP_1_A.csv	572	Meta-Protein 1125	Metagenome unknown	root	4	13	contig139742000078_5	AIFQGPAGYNVPEQVNMFK, ANPDTAAIFTLGPLGAIPTIK, GITEVITEELGGTVDKLDITQDATQAIGILRGWVTQETAEIVELLVEQGYR		MP_MPAv1_NewWF_BGP_1_A.csv
	MP_MPAv1_NewWF_BGP_1_A.csv	573	Meta-Protein 1126	Metagenome unknown	root	1	1	contig5761000067_10	VLFELSGVSEEIAR		MP_MPAv1_NewWF_BGP_1_A.csv
	MP_MPAv1_NewWF_BGP_1_A.csv	574	Meta-Protein 145	Metagenome unknown	root	2	2	contig199000039_33, contig51660000079_2	SEYTPFEMIAYTGSRVITNQALFGFDEETKR		MP_MPAv1_NewWF_BGP_1_A.csv
	MP_MPAv1_NewWF_BGP_1_A.csv	575	Meta-Protein 146	Metagenome unknown	root	1	2	contig73000033_10, contig68000056_2	NILLQDAPGDWTIETK		MP_MPAv1_NewWF_BGP_1_A.csv
	MP_MPAv1_NewWF_BGP_1_A.csv	576	Meta-Protein 1127	Metagenome unknown	root	1	4	contig1102000035_5	EVINWGQGDAYNAFIGGR		MP_MPAv1_NewWF_BGP_1_A.csv
	MP_MPAv1_NewWF_BGP_1_A.csv	577	Meta-Protein 1128	Metagenome unknown	root	1	3	contig139712000004_19	ISLVGFGTFEVR		MP_MPAv1_NewWF_BGP_1_A.csv
	MP_MPAv1_NewWF_BGP_1_A.csv	578	Meta-Protein 147	Metagenome unknown	root	6	7	contig4164000005_1, contig94000050_2, A3DAF4	EKGEPLSIGLLGNAADVLPEFVR, GITPDVVTDQTSAHDPLNGYIPR, GYTVEEAAQLRAEDPQR, KGEISAPVVIGR, KGELSAPVVIGRTLQELENDETLLVQSGKPVGVFR		MP_MPAv1_NewWF_BGP_1_A.csv
	MP_MPAv1_NewWF_BGP_1_A.csv	579	Meta-Protein 1129	Metagenome unknown	root	3	9	contig2637000043_13	IGDDFREIIVEALQHELTPR, SIWLGGENPNTLFRVLDFLWFTDGIEGEVLK		MP_MPAv1_NewWF_BGP_1_A.csv
	MP_MPAv1_NewWF_BGP_1_A.csv	580	Meta-Protein 148	Metagenome unknown	root	5	16	contig330000043_2, contig139090000045_8, contig7714000035_4, contig15000059_14	AGEIWVGDNPSLGLHVGR, AVELAIGSPDAIIKPGQK, IFKRPNDNPVGMYR, VLIKPNLAFQAPPESFAVVDPRVVEAVVAYFKENSK		MP_MPAv1_NewWF_BGP_1_A.csv
	MP_MPAv1_NewWF_BGP_1_A.csv	581	Meta-Protein 149	Metagenome unknown	root	5	15	ATB_S_contig033541, contig781000064_4	AAHAGVAPENGISAILVAAEALTK, IGGSAGNLIAVLEGSK, LLDEFLELVQIDSASKDER, LTEEDYVVQLALRSDGTTILAADDVAGIAAILEAVR		MP_MPAv1_NewWF_BGP_1_A.csv
	MP_MPAv1_NewWF_BGP_1_A.csv	582	Meta-Protein 1130	Metagenome unknown	root	1	2	contig139464000056_50	GVFASTSLIPGEDWR		MP_MPAv1_NewWF_BGP_1_A.csv
	MP_MPAv1_NewWF_BGP_1_A.csv	583	Meta-Protein 1131	Metagenome unknown	root	1	2	contig203000016_2	NAASTQYPGTSVLIDAFR		MP_MPAv1_NewWF_BGP_1_A.csv
	MP_MPAv1_NewWF_BGP_1_A.csv	584	Meta-Protein 150	Metagenome unknown	root	2	5	contig138624000052_12, contig11332000066_5	IIEDLIDGLSVYLEEKLMGLQNIDLISER		MP_MPAv1_NewWF_BGP_1_A.csv
	MP_MPAv1_NewWF_BGP_1_A.csv	585	Meta-Protein 1132	Metagenome unknown	root	1	2	contig2594000021_6	STELLNLLEAR		MP_MPAv1_NewWF_BGP_1_A.csv
	MP_MPAv1_NewWF_BGP_1_A.csv	586	Meta-Protein 1133	Metagenome unknown	root	1	1	contig10738000000_2	FIPISSFVGDNIAK		MP_MPAv1_NewWF_BGP_1_A.csv
	MP_MPAv1_NewWF_BGP_1_A.csv	587	Meta-Protein 1134	Metagenome unknown	root	1	2	contig4826000063_1	YQDASLPTTGGSLVTYVPNLR		MP_MPAv1_NewWF_BGP_1_A.csv
	MP_MPAv1_NewWF_BGP_1_A.csv	588	Meta-Protein 1135	Metagenome unknown	root	1	1	contig1914000047_5	VQLVGFGTFDVAER		MP_MPAv1_NewWF_BGP_1_A.csv
	MP_MPAv1_NewWF_BGP_1_A.csv	589	Meta-Protein 1136	Metagenome unknown	root	1	2	contig682000011_1	ATLPLETGLGNITTEASYESYDFKPR		MP_MPAv1_NewWF_BGP_1_A.csv
	MP_MPAv1_NewWF_BGP_1_A.csv	590	Meta-Protein 1137	Metagenome unknown	root	3	3	contig1036000072_10	AAYEAEIAELEESLK, AAYEAEIAELEESLKAVRYGEDVIEQIEKEQAAFSEK		MP_MPAv1_NewWF_BGP_1_A.csv
	MP_MPAv1_NewWF_BGP_1_A.csv	591	Meta-Protein 1138	Metagenome unknown	root	1	1	contig89000054_14	EGTAGISLFIVPK		MP_MPAv1_NewWF_BGP_1_A.csv
	MP_MPAv1_NewWF_BGP_1_A.csv	592	Meta-Protein 151	Metagenome unknown	root	1	2	contig669000075_3, contig139421000030_1	GANQTIGGNASTTFYNLYLEGTGTK		MP_MPAv1_NewWF_BGP_1_A.csv
	MP_MPAv1_NewWF_BGP_1_A.csv	593	Meta-Protein 1139	Metagenome unknown	root	1	3	contig735000032_173	DAPVLDGKLDDAAWALAAEK		MP_MPAv1_NewWF_BGP_1_A.csv
	MP_MPAv1_NewWF_BGP_1_A.csv	594	Meta-Protein 1140	Metagenome unknown	root	1	1	contig31439000026_2	MVHLTVGADPFPPYQYIDKEGNVSGLDYDVVK		MP_MPAv1_NewWF_BGP_1_A.csv
	MP_MPAv1_NewWF_BGP_1_A.csv	595	Meta-Protein 1141	Metagenome unknown	root	1	1	contig4055000011_2	WGLADQEIPGFVK		MP_MPAv1_NewWF_BGP_1_A.csv
	MP_MPAv1_NewWF_BGP_1_A.csv	596	Meta-Protein 1142	Metagenome unknown	root	5	13	contig1259000026_1	ATSDANMYYLYIDDINIR, ATSDANMYYLYIDDINIRK, ITNFGLNDATVDITFK, LLDNDVAVTEILLQDSYSTGATVQPKSTSYPESFEVYLATAPDPSAIIGSPIISK		MP_MPAv1_NewWF_BGP_1_A.csv
	MP_MPAv1_NewWF_BGP_1_A.csv	597	Meta-Protein 1143	Metagenome unknown	root	1	2	contig319000053_3	VGIIGLVTDETPFVTHPR		MP_MPAv1_NewWF_BGP_1_A.csv
	MP_MPAv1_NewWF_BGP_1_A.csv	598	Meta-Protein 1144	Metagenome unknown	root	1	1	contig255000035_2	AISTISFVIITGISGAGKSEAMK		MP_MPAv1_NewWF_BGP_1_A.csv
	MP_MPAv1_NewWF_BGP_1_A.csv	599	Meta-Protein 152	Metagenome unknown	root	6	15	contig42048000072_3, contig140113000023_9, contig391000011_2	ATDPTDVEATVAVSTEALK, LHSFDPGGNWTLWEK, NFALDLGDGELFYPYDPEAGFR, SLNNFYSEYMAPIGENNR, WSTPEFDEIIRYMLPFLEPTGNK		MP_MPAv1_NewWF_BGP_1_A.csv
	MP_MPAv1_NewWF_BGP_1_A.csv	600	Meta-Protein 1145	Metagenome unknown	root	1	2	contig139730000014_2	FMLPFLEPTGNK		MP_MPAv1_NewWF_BGP_1_A.csv
	MP_MPAv1_NewWF_BGP_1_A.csv	601	Meta-Protein 1146	Metagenome unknown	root	1	2	contig219000015_1	LADLGIISGYPDGTFKPDNLVTR		MP_MPAv1_NewWF_BGP_1_A.csv
	MP_MPAv1_NewWF_BGP_1_A.csv	602	Meta-Protein 153	Metagenome unknown	root	9	25	contig182000074_14, contig3406000010_7, contig139442000016_11, contig9768000067_1	EILAGTLEGDTLAK, EVLAGTLEGDTLAK, FQDALDNEQEILVR, FSEALTNEQEILVR, GIESAAEYALQR, LADIAMEIFAVESALLR, LADMAMEIFAVESALLR, NTVLDFIENEVVPKSVILENVKVPVENMLWK		MP_MPAv1_NewWF_BGP_1_A.csv
	MP_MPAv1_NewWF_BGP_1_A.csv	603	Meta-Protein 154	Metagenome unknown	root	1	2	contig5862000078_8, contig4795000021_4	LSVLELNELVK		MP_MPAv1_NewWF_BGP_1_A.csv
	MP_MPAv1_NewWF_BGP_1_A.csv	604	Meta-Protein 1147	Metagenome unknown	root	1	2	contig15748000008_2	VPLPYAPDALEPVISK		MP_MPAv1_NewWF_BGP_1_A.csv
	MP_MPAv1_NewWF_BGP_1_A.csv	605	Meta-Protein 1148	Metagenome unknown	root	1	1	contig158000004_26	AFIDVVSEELAK		MP_MPAv1_NewWF_BGP_1_A.csv
	MP_MPAv1_NewWF_BGP_1_A.csv	606	Meta-Protein 1149	Metagenome unknown	root	1	3	contig23097000030_2	YTPAQLADMLDANPQLTK		MP_MPAv1_NewWF_BGP_1_A.csv
	MP_MPAv1_NewWF_BGP_1_A.csv	607	Meta-Protein 1150	Metagenome unknown	root	1	1	contig311000065_1	FIPAISGYDGLKPSDPLGQDVLR		MP_MPAv1_NewWF_BGP_1_A.csv
	MP_MPAv1_NewWF_BGP_1_A.csv	608	Meta-Protein 155	Metagenome unknown	root	3	7	contig136000009_2, ATB_S_contig128651, contig350000062_10	DNTPQDTIQRPSTIYGVTK, FIPEFELDFDVDPVRNAFNVTAMSFAPEDIAR		MP_MPAv1_NewWF_BGP_1_A.csv
	MP_MPAv1_NewWF_BGP_1_A.csv	609	Meta-Protein 1151	Metagenome unknown	root	1	4	contig4485000053_3	LAEDGMMFDMLQR		MP_MPAv1_NewWF_BGP_1_A.csv
	MP_MPAv1_NewWF_BGP_1_A.csv	610	Meta-Protein 156	Metagenome unknown	root	7	28	contig5537000041_3, contig3869000030_2, contig2684000061_1, contig1243000023_3, contig662000012_2	FVYLTTVEPEF, GFVGATGVISLDENGDAVK, KLTGNPNSIVEISSYNTGDQDFTAQLTNVK, NKNPDVIFAPGNYGESALLIR, QIPAVGCSPTNPLVTLNNDYYFR, TAAVIQDVTQDYSVGLAKVGSADPQAIRDGLAEVK		MP_MPAv1_NewWF_BGP_1_A.csv
	MP_MPAv1_NewWF_BGP_1_A.csv	611	Meta-Protein 1152	Metagenome unknown	root	1	3	contig163000034_8	AEAITMLDNVLENSK		MP_MPAv1_NewWF_BGP_1_A.csv
	MP_MPAv1_NewWF_BGP_1_A.csv	612	Meta-Protein 157	Metagenome unknown	root	2	2	contig139726000014_28, ATB_S_contig059832, contig139237000033_36, O32467	GYPGYMYTDLATIYERGYPGYMYTDLATLYER		MP_MPAv1_NewWF_BGP_1_A.csv
	MP_MPAv1_NewWF_BGP_1_A.csv	613	Meta-Protein 1153	Metagenome unknown	root	1	4	ATB_S_contig169563	VLPPAEVEWALVR		MP_MPAv1_NewWF_BGP_1_A.csv
	MP_MPAv1_NewWF_BGP_1_A.csv	614	Meta-Protein 1154	EFTU_RUBXD Elongation factor Tu OS=Rubrobacter xylanophilus (strain DSM 9941 / NBRC 16129) GN=tuf1 PE=3 SV=1	Rubrobacter xylanophilus DSM 9941	1	1	Q1AU14	TVGAGVVTQIIE		MP_MPAv1_NewWF_BGP_1_A.csv
	MP_MPAv1_NewWF_BGP_1_A.csv	615	Meta-Protein 158	Metagenome unknown	root	6	10	contig4121000004_1, contig138799000006_37, contig1839000057_4	AYGATDIINYR, FEGFDKIEDALLLMK, GYPMHSGDALGGWK, VIVPAITPDWGDINSQR, VIVPAITPDWGDLNSQRVLIAGGNVDTFAQAIK		MP_MPAv1_NewWF_BGP_1_A.csv
	MP_MPAv1_NewWF_BGP_1_A.csv	616	Meta-Protein 1155	Metagenome unknown	root	1	1	contig42743000002_12	ESFMQNVDLISNLK		MP_MPAv1_NewWF_BGP_1_A.csv
	MP_MPAv1_NewWF_BGP_1_A.csv	617	Meta-Protein 159	Metagenome unknown	root	2	2	contig139006000060_4, contig855000012_3	IALGAVAPTPIRMLLPFDYVR		MP_MPAv1_NewWF_BGP_1_A.csv
	MP_MPAv1_NewWF_BGP_1_A.csv	618	Meta-Protein 1156	Metagenome unknown	root	1	1	contig6847000024_2	GNYLWLGGSPTDDNAYLVR		MP_MPAv1_NewWF_BGP_1_A.csv
	MP_MPAv1_NewWF_BGP_1_A.csv	619	Meta-Protein 1157	Metagenome unknown	root	2	6	contig14544000061_1	EIPALGDYGIAAFKYLEGIPEGLNVDLLPYVQK		MP_MPAv1_NewWF_BGP_1_A.csv
	MP_MPAv1_NewWF_BGP_1_A.csv	620	Meta-Protein 160	Metagenome unknown	root	3	3	contig5387000057_20, contig6496000033_5	FIEQIDELLK, LTDRFIEQIDELLKMLVITPWDK		MP_MPAv1_NewWF_BGP_1_A.csv
	MP_MPAv1_NewWF_BGP_1_A.csv	621	Meta-Protein 161	EFTU1_SYNWW Elongation factor Tu 1 OS=Syntrophomonas wolfei subsp. wolfei (strain DSM 2245B / Goettingen) GN=tuf1 PE=3 SV=1	Syntrophomonas wolfei subsp. wolfei str. Goettingen	1	1	Q0AUH8, Q0AUG3	LLDYAEAGDNIGTLLR		MP_MPAv1_NewWF_BGP_1_A.csv
	MP_MPAv1_NewWF_BGP_1_A.csv	622	Meta-Protein 1158	Metagenome unknown	root	1	3	contig1228000005_11	NADQALLIFGPAQAAVAK		MP_MPAv1_NewWF_BGP_1_A.csv
	MP_MPAv1_NewWF_BGP_1_A.csv	623	Meta-Protein 162	Metagenome unknown	root	2	1	contig1380000042_5, contig1993000076_4	NIIGDLELDETLTSRNLIGDLELDETLTSR		MP_MPAv1_NewWF_BGP_1_A.csv
	MP_MPAv1_NewWF_BGP_1_A.csv	624	Meta-Protein 163	Metagenome unknown	root	3	14	contig2855000041_2, contig4501000031_1, contig38868000008_2, contig38868000008_1, contig14871000039_3, contig1262000027_1, contig2418000075_2, contig18631000068_2	LEHTITNLNTMSENLTASESR, MIINHNLNALNAHRNAQDGISLIQTAEGGLNETHAILQR		MP_MPAv1_NewWF_BGP_1_A.csv
	MP_MPAv1_NewWF_BGP_1_A.csv	625	Meta-Protein 164	Metagenome unknown	root	4	2	contig386000070_75, contig138456000005_15, contig139472000027_17, contig31666000052_2	SDIIQLIR, SDLIQLIR, SDLLQILRSDLLQLLR		MP_MPAv1_NewWF_BGP_1_A.csv
	MP_MPAv1_NewWF_BGP_1_A.csv	626	Meta-Protein 1159	Metagenome unknown	root	2	4	contig4275000039_6	GEATVNDIIQALEREDWAAIDDCSYIYPLVQR		MP_MPAv1_NewWF_BGP_1_A.csv
	MP_MPAv1_NewWF_BGP_1_A.csv	627	Meta-Protein 1160	Metagenome unknown	root	1	2	contig11119000027_9	DAFAWLDAKPIIEPK		MP_MPAv1_NewWF_BGP_1_A.csv
	MP_MPAv1_NewWF_BGP_1_A.csv	628	Meta-Protein 1161	Metagenome unknown	root	1	2	contig8822000016_1	AAIEMLNNNFYNVLSK		MP_MPAv1_NewWF_BGP_1_A.csv
	MP_MPAv1_NewWF_BGP_1_A.csv	629	Meta-Protein 1162	Metagenome unknown	root	1	1	contig139707000053_34	AALPSIENLLER		MP_MPAv1_NewWF_BGP_1_A.csv
	MP_MPAv1_NewWF_BGP_1_A.csv	630	Meta-Protein 1163	Metagenome unknown	root	1	2	contig33402000023_2	TGESMLQITVDQLAR		MP_MPAv1_NewWF_BGP_1_A.csv
	MP_MPAv1_NewWF_BGP_1_A.csv	631	Meta-Protein 1164	Metagenome unknown	root	1	1	contig3292000057_1	IELVETPWAELGEK		MP_MPAv1_NewWF_BGP_1_A.csv
	MP_MPAv1_NewWF_BGP_1_A.csv	632	Meta-Protein 1165	Metagenome unknown	root	2	3	contig139185000033_30	IGLVNMVVPAAEVMDTAKQYVFTGDFFDAETAYR		MP_MPAv1_NewWF_BGP_1_A.csv
	MP_MPAv1_NewWF_BGP_1_A.csv	633	Meta-Protein 1166	Metagenome unknown	root	1	1	contig138480000005_4	VYDMAIEDLLK		MP_MPAv1_NewWF_BGP_1_A.csv
	MP_MPAv1_NewWF_BGP_1_A.csv	634	Meta-Protein 1167	Metagenome unknown	root	1	2	contig5287000051_1	SGQGFENELMFFGAR		MP_MPAv1_NewWF_BGP_1_A.csv
	MP_MPAv1_NewWF_BGP_1_A.csv	635	Meta-Protein 1168	Metagenome unknown	root	2	2	contig1207000006_2	FGADINYPVNENINIFGGADYRGSFGFYAGGLLPVTEK		MP_MPAv1_NewWF_BGP_1_A.csv
	MP_MPAv1_NewWF_BGP_1_A.csv	636	Meta-Protein 1169	Metagenome unknown	root	2	2	contig2787000029_2	TLVDDVIPMIDANYRVNFIMDNLIAEAK		MP_MPAv1_NewWF_BGP_1_A.csv
	MP_MPAv1_NewWF_BGP_1_A.csv	637	Meta-Protein 165	Metagenome unknown	root	11	27	contig20483000070_1, ATB_S_contig099391, contig9545000040_2, contig22627000005_6, contig139069000062_20, contig23049000030_15, contig1400000001_2, contig1310000022_1	DNLYEVIILGGFHALEDVYR, EMGADIMFTDANHDENLQNSQIENLISR, GIEQDAILLDVVPITK, GIEQDAVFAEVIPVTK, GIEQDAVFAEVIPVTKDNLYEVIVK, GLAGIVPTCGQDVDLAAAQR, IAEGTQAVSIFK, IAEGTQAVSIFKDVR, TAIEAAMELAEGKKPSQINGK, VIVDLVPKYFWIGGSPTDDNAYLVR		MP_MPAv1_NewWF_BGP_1_A.csv
	MP_MPAv1_NewWF_BGP_1_A.csv	638	Meta-Protein 166	Metagenome unknown	root	1	2	contig11378000061_1, contig75823000037_3	VLLIAPEQLAQLR		MP_MPAv1_NewWF_BGP_1_A.csv
	MP_MPAv1_NewWF_BGP_1_A.csv	639	Meta-Protein 1170	Metagenome unknown	root	1	1	contig138827000011_6	SSATPRGANATTSPAGSVIPGK		MP_MPAv1_NewWF_BGP_1_A.csv
	MP_MPAv1_NewWF_BGP_1_A.csv	640	Meta-Protein 167	Metagenome unknown	root	12	54	contig732000073_1, contig5725000035_8	AGITAEVPAGMVSADKYTSEAVVDAVTLDGK, EGGINFEVIPMPTLEGK, GLEFLNDLVNTHK, GQDIVYNTGHRIPVAK, IYAVPFAQETSALFVNK, IYAVPFAQETSALFVNKDLVK, LMAADITGDIAK, NNDGTLDPTDIGLGNEGSVK, NQEVAWDLMEVFVEK, SDFAAGNTGFYISGPWDVGTAK, TAGQNMVDQIKEGINQLQTNPTTMEELVEMAK		MP_MPAv1_NewWF_BGP_1_A.csv
	MP_MPAv1_NewWF_BGP_1_A.csv	641	Meta-Protein 168	Metagenome unknown	root	6	8	contig139244000058_55, Q8TIJ3, ATB_B_contig001362, contig580000049_55, contig139244000058_56, contig580000049_54	ELLDKVYNQTVEK, LASLPYDEFVNELQR, LDFTYDSILKDVYER, LLNMGIDEITR, PLLENLWGRTQYWDAISGVAGSDVTSLTALESK		MP_MPAv1_NewWF_BGP_1_A.csv
	MP_MPAv1_NewWF_BGP_1_A.csv	642	Meta-Protein 169	RUXX_METMA Putative snRNP Sm-like protein OS=Methanosarcina mazei (strain ATCC BAA-159 / DSM 3647 / Goe1 / Go1 / JCM 11833 / OCM 88) GN=MM_0339 PE=3 SV=1	Methanosarcina mazei Go1	1	2	Q8PZZ9, contig139628000068_9	ANRPLDILNNALDTPVIVR		MP_MPAv1_NewWF_BGP_1_A.csv
	MP_MPAv1_NewWF_BGP_1_A.csv	643	Meta-Protein 1171	Metagenome unknown	root	3	4	contig15684000023_8	LSAAIPSNTAADIIETTSYTMR, LVAAFMDETLVDDIDRLVAAFMDETLVDDIDRMK		MP_MPAv1_NewWF_BGP_1_A.csv
	MP_MPAv1_NewWF_BGP_1_A.csv	644	Meta-Protein 1172	Metagenome unknown	root	3	5	contig76000068_2	DNYSIEYAPVGLWTLAR, SGYTWYNAQGIEISDPTLLRTIDYEVGFQQMIGEFSAIK		MP_MPAv1_NewWF_BGP_1_A.csv
	MP_MPAv1_NewWF_BGP_1_A.csv	645	Meta-Protein 170	Metagenome unknown	root	5	8	contig139152000061_7, contig95600000008_1, contig11804000020_2	AGDFILKPTKENMEK, GVIPFAQMLEER, IGIPVALTNDANAAAIGEMTYGAAR, IIFSGLKEDDAAVLGASALGWEVILFSGLKEDDAAVLGASALGWEV		MP_MPAv1_NewWF_BGP_1_A.csv
	MP_MPAv1_NewWF_BGP_1_A.csv	646	Meta-Protein 1173	Metagenome unknown	root	1	1	contig8878000001_4	LSNQEIEIPLIIGGK		MP_MPAv1_NewWF_BGP_1_A.csv
	MP_MPAv1_NewWF_BGP_1_A.csv	647	Meta-Protein 171	Metagenome unknown	root	4	9	ATB_B_contig002251, ATB_S_contig025572, contig2040000001_4	AAFDNIVSYIEYAK, ALYEAAGNFYVNDKPTGAVVSQQPFGGAR, FNTYYMEEIYRLGQFHQAGPEEVQAAIEAALR		MP_MPAv1_NewWF_BGP_1_A.csv
	MP_MPAv1_NewWF_BGP_1_A.csv	648	Meta-Protein 1174	Metagenome unknown	root	2	2	contig1521000077_3	DIGLEAGDTLTLTPMPNRMDSGVSADDPIFQMADLSR		MP_MPAv1_NewWF_BGP_1_A.csv
	MP_MPAv1_NewWF_BGP_1_A.csv	649	Meta-Protein 1175	Metagenome unknown	root	2	6	contig1564000036_1	ETATTLESAPPLIDVILLAQEKYSLLGTDSGLLLWEASSDGRK		MP_MPAv1_NewWF_BGP_1_A.csv
	MP_MPAv1_NewWF_BGP_1_A.csv	650	Meta-Protein 172	Metagenome unknown	root	6	14	ATB_S_contig021092, contig7858000029_2	EQLDDTKAPDNVPQWAQIEAAIQR, ILDENGYPAVTEPEFVEALEFYAK, LFHDGITPVDSGGTDLFQEFAR, SWEDEELIGNPMMAVLR, TAVEAAQALEADIRTDLLAEVGFSEPPQTWDELR		MP_MPAv1_NewWF_BGP_1_A.csv
	MP_MPAv1_NewWF_BGP_1_A.csv	651	Meta-Protein 173	PHSM_STRPN Maltodextrin phosphorylase OS=Streptococcus pneumoniae serotype 4 (strain ATCC BAA-334 / TIGR4) GN=malP PE=3 SV=2	root	10	14	P29849, contig139467000022_5, contig9442000036_4	DATKLESLLK, EASKEEIYLALLELTK, LFDIDTIDETLVEEGIDFDKEEIKK, LLSNNLINLGIYDDVK, LLSNNLINLGLYDDVK, MLEVGDEENLTR, TDIQFDVLFGGFK, TIEQYNKEIWK, VVMIENYNVTKVVMIENYNVTKAEK		MP_MPAv1_NewWF_BGP_1_A.csv
	MP_MPAv1_NewWF_BGP_1_A.csv	652	Meta-Protein 1176	Metagenome unknown	root	1	1	contig5000005_34	SIAALPNGMLTGEVKVLGFDPATGVLSWEGD		MP_MPAv1_NewWF_BGP_1_A.csv
	MP_MPAv1_NewWF_BGP_1_A.csv	653	Meta-Protein 1177	Metagenome unknown	root	2	3	contig234000049_2	AGLEPLAAYSLEALQKNQVIAWLEELVEK		MP_MPAv1_NewWF_BGP_1_A.csv
	MP_MPAv1_NewWF_BGP_1_A.csv	654	Meta-Protein 174	Metagenome unknown	root	16	74	contig516000058_19, contig384000050_2, contig5017000060_2, ATB_S_contig089431	AAIANLEAFEYGYWQPK, EAFEFGYWQPK, ELIPEPPKTLDEFFQIAK, FNEEQDEIFVESIYQGR, GIIYEMVTK, KALEQMIGMLEDGSALLIDGYEDGAFGDR, MLVEEAIDAMLSERF, MLVEEAIQEMLSE, MLVEEAIQEMLSER, MLVEEAIQEMLSERF, SNWVMYYNK, TGYLPVTYSGLDHPEYVAWLEANPHK, TLDEFFQIAK, VFLGEDIDLALAEGR, VFLGEDIDMALAEGRWLTNAENTVYFATK		MP_MPAv1_NewWF_BGP_1_A.csv
	MP_MPAv1_NewWF_BGP_1_A.csv	655	Meta-Protein 175	Metagenome unknown	root	3	4	contig751000001_4, ATB_S_contig060353	ESTNSTPIQVLSAPEVVVVPLLQHAGR, IEEAGIVGMGGAGFPTAPKLMVEYPEEIILGAK		MP_MPAv1_NewWF_BGP_1_A.csv
	MP_MPAv1_NewWF_BGP_1_A.csv	656	Meta-Protein 176	Metagenome unknown	root	3	5	ATB_S_contig041353, contig139737000014_11, contig12931000070_2, ATB_S_contig041351	ELVILPATLHPEWQEVVR, FGQPELALFSVTEARTKAEMDAFVSTLR		MP_MPAv1_NewWF_BGP_1_A.csv
	MP_MPAv1_NewWF_BGP_1_A.csv	657	Meta-Protein 1178	Metagenome unknown	root	1	4	ATB_G5_contig033781	VGAWWDMSPDEGSPFGAK		MP_MPAv1_NewWF_BGP_1_A.csv
	MP_MPAv1_NewWF_BGP_1_A.csv	658	Meta-Protein 177	Metagenome unknown	root	3	6	contig102326000055_1, contig3796000041_1	AADGQLIGTLGGHASGVK, ALAWSPQGDILASAGEDVVVRTVAWSPDGSLLLSGGDALDVK		MP_MPAv1_NewWF_BGP_1_A.csv
	MP_MPAv1_NewWF_BGP_1_A.csv	659	Meta-Protein 178	VATB_METBA V-type ATP synthase beta chain OS=Methanosarcina barkeri GN=atpB PE=3 SV=1	root	8	32	P22663, contig139244000058_52, Q60187, A2SST6, Q46FH4, Q8TIJ0	AVSDQLYAAYAEGR, AVVFLNLADDPAVER, FLEFADLFEDK, FLEFADLFEDKFVR, IVPDQLLDINGAAMNPYAR, LPPKDFIQTGISTIDGTNTLVR, TEPVGYNEIVNIRTISQIAGPLIFVEK		MP_MPAv1_NewWF_BGP_1_A.csv
	MP_MPAv1_NewWF_BGP_1_A.csv	660	Meta-Protein 1179	Metagenome unknown	root	1	1	contig484000009_10	ILGIESLLDR		MP_MPAv1_NewWF_BGP_1_A.csv
	MP_MPAv1_NewWF_BGP_1_A.csv	661	Meta-Protein 1180	Metagenome unknown	root	1	2	contig139098000017_2	VVDLISYMASVDSK		MP_MPAv1_NewWF_BGP_1_A.csv
	MP_MPAv1_NewWF_BGP_1_A.csv	662	Meta-Protein 1181	Metagenome unknown	root	3	4	contig101000059_24	ALAFSYPVEPDLIVK, DLGGLADLAPYIDSHLPDLKSLYDVAGVNFFVPASSK		MP_MPAv1_NewWF_BGP_1_A.csv
	MP_MPAv1_NewWF_BGP_1_A.csv	663	Meta-Protein 1182	Metagenome unknown	root	1	4	contig25488000073_1	QVTFVDGVGTLDVDAWK		MP_MPAv1_NewWF_BGP_1_A.csv
	MP_MPAv1_NewWF_BGP_1_A.csv	664	Meta-Protein 179	Metagenome unknown	root	6	12	contig138783000051_13, contig176000056_1, contig1751000054_1	ATSGGPFASVELLR, GDQTLFWVFNDR, GPINVSVVDPLNVIDAR, IEGQGNGGNILDILPESEKEILANNFVQELK, VLDGPDAPDLVIQELNRWLSGVPDEEGSSSLNWIR		MP_MPAv1_NewWF_BGP_1_A.csv
	MP_MPAv1_NewWF_BGP_1_A.csv	665	Meta-Protein 1183	Metagenome unknown	root	1	2	contig139623000075_4	SPSGYILSPGCEFPVNALPVK		MP_MPAv1_NewWF_BGP_1_A.csv
	MP_MPAv1_NewWF_BGP_1_A.csv	666	Meta-Protein 180	Metagenome unknown	root	1	3	contig97000046_1, contig367000039_5	LLELAWEGWR		MP_MPAv1_NewWF_BGP_1_A.csv
	MP_MPAv1_NewWF_BGP_1_A.csv	667	Meta-Protein 1184	Metagenome unknown	root	1	1	contig139654000029_1	NAAAGYFLPLNDYLK		MP_MPAv1_NewWF_BGP_1_A.csv
	MP_MPAv1_NewWF_BGP_1_A.csv	668	Meta-Protein 1185	Metagenome unknown	root	2	11	contig35284000058_1	DKLGQVVDWFEPEQAEVQLRLGQVVDWFEPEQAEVQLR		MP_MPAv1_NewWF_BGP_1_A.csv
	MP_MPAv1_NewWF_BGP_1_A.csv	669	Meta-Protein 1186	Metagenome unknown	root	1	2	contig138344000005_1	ALLGEITSQQMLDEIAK		MP_MPAv1_NewWF_BGP_1_A.csv
	MP_MPAv1_NewWF_BGP_1_A.csv	670	Meta-Protein 1187	Metagenome unknown	root	1	3	contig1010000023_2	QTLERMQLNR		MP_MPAv1_NewWF_BGP_1_A.csv
	MP_MPAv1_NewWF_BGP_1_A.csv	671	Meta-Protein 181	Metagenome unknown	root	4	13	contig9598000026_6, contig4153000047_4	AIYNSINGSIIPENIEALAK, AIYNSINGSILPENIEALAK, DNLIQQLTRSDVDAAIVLAFNPADPSVAGR		MP_MPAv1_NewWF_BGP_1_A.csv
	MP_MPAv1_NewWF_BGP_1_A.csv	672	Meta-Protein 1188	Metagenome unknown	root	1	2	contig139657000012_5	VMITEFDLSALPSPK		MP_MPAv1_NewWF_BGP_1_A.csv
	MP_MPAv1_NewWF_BGP_1_A.csv	673	Meta-Protein 1189	Metagenome unknown	root	1	1	contig1728000012_1	GNEETISSLENLVIAAK		MP_MPAv1_NewWF_BGP_1_A.csv
	MP_MPAv1_NewWF_BGP_1_A.csv	674	Meta-Protein 1190	Metagenome unknown	root	1	3	contig12973000017_4	NAGPAGTFLFGVIER		MP_MPAv1_NewWF_BGP_1_A.csv
	MP_MPAv1_NewWF_BGP_1_A.csv	675	Meta-Protein 182	Metagenome unknown	root	3	3	contig2895000072_1, contig4584000005_2	DKINQDLLNIIDEVTDAYGIK, NIIGNMTLDEVLSGRNILGNMTLDEVLSGR		MP_MPAv1_NewWF_BGP_1_A.csv
	MP_MPAv1_NewWF_BGP_1_A.csv	676	Meta-Protein 1191	Metagenome unknown	root	1	1	contig9823000023_1	SDELLTTWNQVATTIK		MP_MPAv1_NewWF_BGP_1_A.csv
	MP_MPAv1_NewWF_BGP_1_A.csv	677	Meta-Protein 1192	Metagenome unknown	root	1	2	contig130000071_12	AVASESGLLTTIAWGVDGK		MP_MPAv1_NewWF_BGP_1_A.csv
	MP_MPAv1_NewWF_BGP_1_A.csv	678	Meta-Protein 183	ACKA_SYNWW Acetate kinase OS=Syntrophomonas wolfei subsp. wolfei (strain DSM 2245B / Goettingen) GN=ackA PE=3 SV=1	root	3	1	Q0AYW5, contig5000038_191, contig139896000041_23	IFIIPTNEELVIAR, IFLIPTNEELVIARLFIIPTNEELVIAR		MP_MPAv1_NewWF_BGP_1_A.csv
	MP_MPAv1_NewWF_BGP_1_A.csv	679	Meta-Protein 1193	Metagenome unknown	root	1	1	contig139450000056_8	NSPLVSVVGQVPTDDFGVMAR		MP_MPAv1_NewWF_BGP_1_A.csv
	MP_MPAv1_NewWF_BGP_1_A.csv	680	Meta-Protein 1194	Metagenome unknown	root	1	2	contig139171000010_8	VVNTVIDSIVDAVAKDEK		MP_MPAv1_NewWF_BGP_1_A.csv
	MP_MPAv1_NewWF_BGP_1_A.csv	681	Meta-Protein 1195	Metagenome unknown	root	2	6	contig518000046_1	ILNGEEVPDFIPVPVKLITIENAEGFSW		MP_MPAv1_NewWF_BGP_1_A.csv
	MP_MPAv1_NewWF_BGP_1_A.csv	682	Meta-Protein 184	Metagenome unknown	root	6	25	ATB_S_contig118102, contig1909000079_2, contig3661000074_2, ATB_S_contig024211, contig11664000065_1	ALEAGIPVIGTNADAGPDNPR, GAQDAAAMINAFDPTVK, VAIGVEDLGHTSLAER, VISGGWDLVPTTIENIK, VISGGWDLVPTTIENIKDGYTKVLAQTLIDHIGTSGK		MP_MPAv1_NewWF_BGP_1_A.csv
	MP_MPAv1_NewWF_BGP_1_A.csv	683	Meta-Protein 1196	Metagenome unknown	root	2	3	contig32000064_7	EADDTYKNPGLYSNPVVDGYLETALRNAGSDILGNIYEWTR		MP_MPAv1_NewWF_BGP_1_A.csv
	MP_MPAv1_NewWF_BGP_1_A.csv	684	Meta-Protein 1197	Metagenome unknown	root	1	1	contig457000028_4	AAAIDLAGRDVLEAVQMSVNPK		MP_MPAv1_NewWF_BGP_1_A.csv
	MP_MPAv1_NewWF_BGP_1_A.csv	685	Meta-Protein 185	Metagenome unknown	root	18	59	ATB_S_contig170503, contig433000037_5, contig6203000009_2, contig64398000018_1, ATB_G5_contig035601, contig8060000046_2, contig139466000056_85, contig2906000016_4, contig139708000053_18, contig735000068_1, contig187000027_49, contig130572000023_1, contig11955000009_1	DGVDFLLISAANASGWDDVLESAKR, DGVDYLLISAAHASGWDDVLLAAK, DGVDYLLISAAHASGWDDVLLAAKR, GIVYQEEIILDTDTITDEHIEK, GIVYQEELILDTDTITDEHIEK, LNIVWDGTGGDTWSLEEAR, LNIVWDGTGGDTWSLEEARK, LNLVWDGTGGDTWSLEEAR, LNLVWDGTGGDTWSLEEARK, MASQIDQWIK, NVQAGYWNADVQCNPR, QANVEDLNLVFSR, QANVEDMDAVFSR, QANVEDMNVVFSR, QTNTADVNEQMAAAMGYIR, SAPVLQAAEEGKLNIVWDGTGGDTWSLEEAR, YGINADPGKGVITRYGINPDPGKGVITR		MP_MPAv1_NewWF_BGP_1_A.csv
	MP_MPAv1_NewWF_BGP_1_A.csv	686	Meta-Protein 1198	Metagenome unknown	root	1	1	contig138557000059_4	VSVTPISIIAGATNEEDYVK		MP_MPAv1_NewWF_BGP_1_A.csv
	MP_MPAv1_NewWF_BGP_1_A.csv	687	Meta-Protein 1199	Metagenome unknown	root	1	3	contig1660000018_3	NIVNTLDIIPESLEK		MP_MPAv1_NewWF_BGP_1_A.csv
	MP_MPAv1_NewWF_BGP_1_A.csv	688	Meta-Protein 1200	Metagenome unknown	root	1	1	contig139529000075_7	GHYELIDSFLDEVTR		MP_MPAv1_NewWF_BGP_1_A.csv
	MP_MPAv1_NewWF_BGP_1_A.csv	689	Meta-Protein 1201	Metagenome unknown	root	1	1	contig2311000033_1	EISEELLEVLR		MP_MPAv1_NewWF_BGP_1_A.csv
	MP_MPAv1_NewWF_BGP_1_A.csv	690	Meta-Protein 1202	Metagenome unknown	root	2	8	contig661000077_3	AIFPDLITAINDLPETPRATPSVIDINYILAER		MP_MPAv1_NewWF_BGP_1_A.csv
	MP_MPAv1_NewWF_BGP_1_A.csv	691	Meta-Protein 1203	Metagenome unknown	root	1	1	contig3252000012_1	QLGVEGAMALLMK		MP_MPAv1_NewWF_BGP_1_A.csv
	MP_MPAv1_NewWF_BGP_1_A.csv	692	Meta-Protein 1204	Metagenome unknown	root	2	2	contig1015000020_6	CELVVAEVLEAAPVKSLADTAWGLLEPGTQTR		MP_MPAv1_NewWF_BGP_1_A.csv
	MP_MPAv1_NewWF_BGP_1_A.csv	693	Meta-Protein 186	Metagenome unknown	root	2	6	contig18191000073_4, contig139703000004_5	AVMNFGGVEENVVTRDEFPLSKTGIVPPPDVDVILVAPK		MP_MPAv1_NewWF_BGP_1_A.csv
	MP_MPAv1_NewWF_BGP_1_A.csv	694	Meta-Protein 1205	Metagenome unknown	root	1	1	contig30691000070_4	AAEVILDVR		MP_MPAv1_NewWF_BGP_1_A.csv
	MP_MPAv1_NewWF_BGP_1_A.csv	695	Meta-Protein 1206	Metagenome unknown	root	1	2	contig245000059_1	GAGNWSQTYIAAPTGLEMTWPR		MP_MPAv1_NewWF_BGP_1_A.csv
	MP_MPAv1_NewWF_BGP_1_A.csv	696	Meta-Protein 1207	Metagenome unknown	root	1	1	contig2000023_30	MIGAMELSQMFFEMEQLGNAGEK		MP_MPAv1_NewWF_BGP_1_A.csv
	MP_MPAv1_NewWF_BGP_1_A.csv	697	Meta-Protein 187	Metagenome unknown	root	2	2	contig344000014_17, contig89373000040_4	AGETYEFESMYPEFIKTLENLMAAFAGESQAAR		MP_MPAv1_NewWF_BGP_1_A.csv
	MP_MPAv1_NewWF_BGP_1_A.csv	698	Meta-Protein 1208	Metagenome unknown	root	1	1	contig21000028_62	IIDGFMIQGGCPHTKPGGNMSLAGTGGPGYQIK		MP_MPAv1_NewWF_BGP_1_A.csv
	MP_MPAv1_NewWF_BGP_1_A.csv	699	Meta-Protein 1209	Metagenome unknown	root	1	3	contig632000031_10	AEPLLAGPLDVALYQK		MP_MPAv1_NewWF_BGP_1_A.csv
	MP_MPAv1_NewWF_BGP_1_A.csv	700	Meta-Protein 1210	Metagenome unknown	root	2	2	contig12058000003_1	DTTPGQILSVFENLSMKEAANPFFEAVPDIVEK		MP_MPAv1_NewWF_BGP_1_A.csv
	MP_MPAv1_NewWF_BGP_1_A.csv	701	Meta-Protein 188	Metagenome unknown	root	2	5	contig9077000070_1, ATB_S_contig102492	MLGGDPPDSFQVHAGQELIGTWVVAQRSNVMYYIPENLKK		MP_MPAv1_NewWF_BGP_1_A.csv
	MP_MPAv1_NewWF_BGP_1_A.csv	702	Meta-Protein 189	Metagenome unknown	root	5	18	ATB_G30_contig024392, contig139737000014_13, contig13474000013_54	DYAWIEQNLQPGTELVDR, GGIIDDILAYR, MPLYGNDIDEDTTPLEAGLGR, SPPLVEEVLGVSVAELRSSVGIFDLTHMGEFEVTGPGALDTVNR		MP_MPAv1_NewWF_BGP_1_A.csv
	MP_MPAv1_NewWF_BGP_1_A.csv	703	Meta-Protein 1211	Metagenome unknown	root	1	1	contig17819000017_2	SGIADNLQLSLPFR		MP_MPAv1_NewWF_BGP_1_A.csv
	MP_MPAv1_NewWF_BGP_1_A.csv	704	Meta-Protein 1212	Metagenome unknown	root	1	1	contig338000071_2	LQGLELVLYGAEQSGNISQR		MP_MPAv1_NewWF_BGP_1_A.csv
	MP_MPAv1_NewWF_BGP_1_A.csv	705	Meta-Protein 1213	Metagenome unknown	root	1	1	contig52000056_7	DNPCIMFAPDLSQMIFNQILGLGDKNHNR		MP_MPAv1_NewWF_BGP_1_A.csv
	MP_MPAv1_NewWF_BGP_1_A.csv	706	Meta-Protein 1214	Metagenome unknown	root	1	1	contig1716000061_3	AAGLEDPFELWK		MP_MPAv1_NewWF_BGP_1_A.csv
	MP_MPAv1_NewWF_BGP_1_A.csv	707	Meta-Protein 1215	MURC_PROAC UDP-N-acetylmuramate--L-alanine ligase OS=Propionibacterium acnes (strain KPA171202 / DSM 16379) GN=murC PE=3 SV=1	Propionibacterium acnes KPA171202	1	1	Q6A9Q1	EDPIPGVTGELVHDAVIAAGGDSR		MP_MPAv1_NewWF_BGP_1_A.csv
	MP_MPAv1_NewWF_BGP_1_A.csv	708	Meta-Protein 190	ACDA2_METMA Acetyl-CoA decarbonylase/synthase complex subunit alpha 2 OS=Methanosarcina mazei (strain ATCC BAA-159 / DSM 3647 / Goe1 / Go1 / JCM 11833 / OCM 88) GN=cdhA2 PE=1 SV=4	Methanosarcina	14	59	Q49163, Q8TRZ4, Q8THW2, Q8TJC6, Q46G04, Q49161, Q08368	ADPEAPLIEIGMGTIDK, DVYLIAEEFLK, DVYLIAEEFLKR, EIPILNVLEK, FVRNEADLPLAK, GSYEYLEALHDVCIGCR, IKFDVSAQPTNLK, KYLGVEPEDWWK, LTHWMELSK, LTHWMELSKK, NEADLPLAKREELLK, SGMPDVIVVDEQCVR, TLAGNLAEVADYTLNRYLGVEPEDWWK		MP_MPAv1_NewWF_BGP_1_A.csv
	MP_MPAv1_NewWF_BGP_1_A.csv	709	Meta-Protein 1216	Metagenome unknown	root	1	2	contig465000024_2	FQYYELEDLLK		MP_MPAv1_NewWF_BGP_1_A.csv
	MP_MPAv1_NewWF_BGP_1_A.csv	710	Meta-Protein 1217	Metagenome unknown	root	2	4	contig848000057_9	IAESVDIPMILYNVPSRTGQDMPVEVIAELAK		MP_MPAv1_NewWF_BGP_1_A.csv
	MP_MPAv1_NewWF_BGP_1_A.csv	711	Meta-Protein 191	Metagenome unknown	root	1	2	contig1387000058_1, ATB_S_contig159623	ISTDAELLLELAR		MP_MPAv1_NewWF_BGP_1_A.csv
	MP_MPAv1_NewWF_BGP_1_A.csv	712	Meta-Protein 1218	Metagenome unknown	root	1	2	contig910000005_2	IMTNLGELLLGGK		MP_MPAv1_NewWF_BGP_1_A.csv
	MP_MPAv1_NewWF_BGP_1_A.csv	713	Meta-Protein 1219	Metagenome unknown	root	1	2	ATB_S_contig146921	LNIIFGEDSWLAGENGR		MP_MPAv1_NewWF_BGP_1_A.csv
	MP_MPAv1_NewWF_BGP_1_A.csv	714	Meta-Protein 1220	Metagenome unknown	root	1	1	contig139330000069_8	AGVLGAAALAILESK		MP_MPAv1_NewWF_BGP_1_A.csv
	MP_MPAv1_NewWF_BGP_1_A.csv	715	Meta-Protein 1221	Metagenome unknown	root	2	2	contig191000058_8	EYIGDPNFDFVPLYELLSKYGTMTLAEVLAPAIK		MP_MPAv1_NewWF_BGP_1_A.csv
	MP_MPAv1_NewWF_BGP_1_A.csv	716	Meta-Protein 192	Metagenome unknown	root	3	5	ATB_S_contig134601, contig139697000054_4	EAVQVILSGMEGR, IDAQFLGELPAALRLLRLPEIDNLEK		MP_MPAv1_NewWF_BGP_1_A.csv
	MP_MPAv1_NewWF_BGP_1_A.csv	717	Meta-Protein 193	Metagenome unknown	root	4	6	contig139067000060_22, contig36000026_7, contig4479000025_12	GLNTGIGDEGGFAPDLSSNEEAIAVIIEATEK, MDTTIIDVFAR, VNQIGSLTETIDAIEMAKVNQIGSLTETLDAIEMAK		MP_MPAv1_NewWF_BGP_1_A.csv
	MP_MPAv1_NewWF_BGP_1_A.csv	718	Meta-Protein 1222	Metagenome unknown	root	4	8	contig139101000034_1	EKQEEAIMFLIESAELR, FPYQEGMEVAELFMR, TNNFNDVLTNLQTAIQRVADGVITTSVLADALTTDPSFSDDNFQR		MP_MPAv1_NewWF_BGP_1_A.csv
	MP_MPAv1_NewWF_BGP_1_A.csv	719	Meta-Protein 1223	Metagenome unknown	root	1	5	ATB_S_contig071113	EFALLGQVLGDER		MP_MPAv1_NewWF_BGP_1_A.csv
	MP_MPAv1_NewWF_BGP_1_A.csv	720	Meta-Protein 1224	Metagenome unknown	root	2	2	contig1521000077_10	EISSSAEGVPIDSIVFSRYLVIPLAQNLVTEDR		MP_MPAv1_NewWF_BGP_1_A.csv
	MP_MPAv1_NewWF_BGP_1_A.csv	721	Meta-Protein 1225	Metagenome unknown	root	1	1	contig139592000027_6	GAVVDLSQFPDFPEVAQR		MP_MPAv1_NewWF_BGP_1_A.csv
	MP_MPAv1_NewWF_BGP_1_A.csv	722	Meta-Protein 1226	Metagenome unknown	root	1	1	contig47654000031_3	VVTNDWLADDEIAVFR		MP_MPAv1_NewWF_BGP_1_A.csv
	MP_MPAv1_NewWF_BGP_1_A.csv	723	Meta-Protein 1227	Metagenome unknown	root	1	3	contig11632000011_1	VINDNFGLEEGLMTTVHAMTATQK		MP_MPAv1_NewWF_BGP_1_A.csv
	MP_MPAv1_NewWF_BGP_1_A.csv	724	Meta-Protein 1228	Metagenome unknown	root	1	1	contig1125000023_4	ILIIACPLIGIVICAKGMK		MP_MPAv1_NewWF_BGP_1_A.csv
	MP_MPAv1_NewWF_BGP_1_A.csv	725	Meta-Protein 1229	Metagenome unknown	root	1	1	contig826000015_4	ASGALDDVLAVLK		MP_MPAv1_NewWF_BGP_1_A.csv
	MP_MPAv1_NewWF_BGP_1_A.csv	726	Meta-Protein 1230	Metagenome unknown	root	1	1	contig138753000019_13	QIQPGLPVVGQTIFDVPK		MP_MPAv1_NewWF_BGP_1_A.csv
	MP_MPAv1_NewWF_BGP_1_A.csv	727	Meta-Protein 1231	Metagenome unknown	root	1	2	contig3159000063_6	VLSGFISGEDAIAGIVGR		MP_MPAv1_NewWF_BGP_1_A.csv
	MP_MPAv1_NewWF_BGP_1_A.csv	728	Meta-Protein 1232	Metagenome unknown	root	1	2	contig3965000044_3	DFMASITDVVGGR		MP_MPAv1_NewWF_BGP_1_A.csv
	MP_MPAv1_NewWF_BGP_1_A.csv	729	Meta-Protein 1233	PSRA_DICDI Serine/threonine-protein phosphatase 2A regulatory subunit psrA OS=Dictyostelium discoideum GN=psrA PE=3 SV=1	Dictyostelium discoideum	1	2	Q54VB6	LFMEIDMDLFNK		MP_MPAv1_NewWF_BGP_1_A.csv
	MP_MPAv1_NewWF_BGP_1_A.csv	730	Meta-Protein 1234	Metagenome unknown	root	1	1	contig2679000024_1	MIAPVFEELSEEYAGR		MP_MPAv1_NewWF_BGP_1_A.csv
	MP_MPAv1_NewWF_BGP_1_A.csv	731	Meta-Protein 1235	Metagenome unknown	root	1	1	contig139824000029_37	IQDVEGIEVVAINDLTDAK		MP_MPAv1_NewWF_BGP_1_A.csv
	MP_MPAv1_NewWF_BGP_1_A.csv	732	Meta-Protein 194	Metagenome unknown	root	1	2	contig432000047_4, ATB_S_contig090341	MADLVLWNGDPLEVQSR		MP_MPAv1_NewWF_BGP_1_A.csv
	MP_MPAv1_NewWF_BGP_1_A.csv	733	Meta-Protein 1236	Metagenome unknown	root	1	1	contig3953000048_1	IQEGINALAGYAEIFQR		MP_MPAv1_NewWF_BGP_1_A.csv
	MP_MPAv1_NewWF_BGP_1_A.csv	734	Meta-Protein 195	Metagenome unknown	root	3	4	contig43523000060_5, contig15223000030_1	IMVPSGWTDWEEAIR, ISNGNWGSYDNPELFRSAEAVGINIIPDFPDQSLFDNNR		MP_MPAv1_NewWF_BGP_1_A.csv
	MP_MPAv1_NewWF_BGP_1_A.csv	735	Meta-Protein 1237	Metagenome unknown	root	1	1	contig1593000058_44	HPIVQGGMGLGISWDK		MP_MPAv1_NewWF_BGP_1_A.csv
	MP_MPAv1_NewWF_BGP_1_A.csv	736	Meta-Protein 1238	Metagenome unknown	root	1	2	ATB_G30_contig024102	SVLESPEIQQLFEEQPYYR		MP_MPAv1_NewWF_BGP_1_A.csv
	MP_MPAv1_NewWF_BGP_1_A.csv	737	Meta-Protein 196	Metagenome unknown	root	2	4	contig16670000078_1, contig139256000069_7	GALYVWGPDIEGCYQIKLQEDGETIWITDNYFLK		MP_MPAv1_NewWF_BGP_1_A.csv
	MP_MPAv1_NewWF_BGP_1_A.csv	738	Meta-Protein 1239	Metagenome unknown	root	1	3	contig855000012_4	LLDFLREELDLTGAK		MP_MPAv1_NewWF_BGP_1_A.csv
	MP_MPAv1_NewWF_BGP_1_A.csv	739	Meta-Protein 1240	Metagenome unknown	root	1	3	contig517000008_1	ALPANLDWAIGEFSK		MP_MPAv1_NewWF_BGP_1_A.csv
	MP_MPAv1_NewWF_BGP_1_A.csv	740	Meta-Protein 197	Metagenome unknown	root	2	6	ATB_S_contig021951, contig139667000075_5	NALTNLESIAQAAGTSLQKVVHTEKAPAAIGPYSQAIK		MP_MPAv1_NewWF_BGP_1_A.csv
	MP_MPAv1_NewWF_BGP_1_A.csv	741	Meta-Protein 1241	Metagenome unknown	root	1	4	contig40591000016_1	VSELLLQSSFDDVLASGAR		MP_MPAv1_NewWF_BGP_1_A.csv
	MP_MPAv1_NewWF_BGP_1_A.csv	742	Meta-Protein 1242	Metagenome unknown	root	1	3	contig65642000027_1	ASGAPVIAGAIEFAGEMAK		MP_MPAv1_NewWF_BGP_1_A.csv
	MP_MPAv1_NewWF_BGP_1_A.csv	743	Meta-Protein 1243	Metagenome unknown	root	1	3	contig139256000069_5	DIEAPIELVVETSK		MP_MPAv1_NewWF_BGP_1_A.csv
	MP_MPAv1_NewWF_BGP_1_A.csv	744	Meta-Protein 1244	Metagenome unknown	root	1	1	contig1335000037_2	EALSTQISIIGENLSIRR		MP_MPAv1_NewWF_BGP_1_A.csv
	MP_MPAv1_NewWF_BGP_1_A.csv	745	Meta-Protein 1245	Metagenome unknown	root	1	3	contig575000028_3	EQVILQMGSDPEMALLTVQQR		MP_MPAv1_NewWF_BGP_1_A.csv
	MP_MPAv1_NewWF_BGP_1_A.csv	746	Meta-Protein 198	Metagenome unknown	root	8	14	contig32391000051_17, Q46CA1, Q8TGX7, Q8PW06	AAVEEGVVTGGGISLFR, DMLEDIAVLTGGQVISEDK, DVFEDLFEAGVIDPTK, KDVFEDLFEAGVIDPTK, SALQNAASIAGMVLTTEALVTEFDEEKDER, TQDNTGDGTTTATLLAQSMIR, VGYNGVITVEDSKVVQVATVSANNDEEIGNLISDAMER		MP_MPAv1_NewWF_BGP_1_A.csv
	MP_MPAv1_NewWF_BGP_1_A.csv	747	Meta-Protein 1246	Metagenome unknown	root	1	2	contig139372000016_4	MDSYQVVLEYFEK		MP_MPAv1_NewWF_BGP_1_A.csv
	MP_MPAv1_NewWF_BGP_1_A.csv	748	Meta-Protein 1247	Metagenome unknown	root	1	2	contig382000069_1	DVDLLSFEIR		MP_MPAv1_NewWF_BGP_1_A.csv
	MP_MPAv1_NewWF_BGP_1_A.csv	749	Meta-Protein 1248	Metagenome unknown	root	1	3	contig16127000040_4	YTEPDANGELILDYYIPVK		MP_MPAv1_NewWF_BGP_1_A.csv
	MP_MPAv1_NewWF_BGP_1_A.csv	750	Meta-Protein 199	Metagenome unknown	root	2	5	contig5740000042_10, contig18621000050_2	FALENDIVDGVLAVKFALENDIVDGVLAVKK		MP_MPAv1_NewWF_BGP_1_A.csv
	MP_MPAv1_NewWF_BGP_1_A.csv	751	Meta-Protein 200	Metagenome unknown	root	7	15	contig57539000017_2, ATB_G5_contig080291	ADVITLHVPLTSETK, AKELDMPVLR, GFGMDIIAYDIYQDINSNIK, GQLTNEVNQFLEGIKA, MKDDAILINTAR, VPSYSPEAVAEHAAALLLAVNRYVSLDELFSK		MP_MPAv1_NewWF_BGP_1_A.csv
	MP_MPAv1_NewWF_BGP_1_A.csv	752	Meta-Protein 1249	Metagenome unknown	root	2	4	contig139119000058_3	LFGETELLFPVEQIAYLKLGEVGFTGLVYQPVVLGEAK		MP_MPAv1_NewWF_BGP_1_A.csv
	MP_MPAv1_NewWF_BGP_1_A.csv	753	Meta-Protein 1250	Metagenome unknown	root	1	1	contig23000058_5	IVASLVFLVMLCAAGTCTANAELRWSK		MP_MPAv1_NewWF_BGP_1_A.csv
	MP_MPAv1_NewWF_BGP_1_A.csv	754	Meta-Protein 1251	Metagenome unknown	root	1	1	contig28000075_22	SGSSLALEPVQFEFFGK		MP_MPAv1_NewWF_BGP_1_A.csv
	MP_MPAv1_NewWF_BGP_1_A.csv	755	Meta-Protein 201	Metagenome unknown	root	3	5	contig1093000005_67, contig19636000004_11	NGEGIQHIAFR, NGEGIQHLAFRVAFLPTGDSEVELLESTSPDGPIAK		MP_MPAv1_NewWF_BGP_1_A.csv
	MP_MPAv1_NewWF_BGP_1_A.csv	756	Meta-Protein 1252	Metagenome unknown	root	1	1	contig188000065_12	FEALLAEMGVMTAEEAEAIRK		MP_MPAv1_NewWF_BGP_1_A.csv
	MP_MPAv1_NewWF_BGP_1_A.csv	757	Meta-Protein 1253	Metagenome unknown	root	1	1	contig11818000012_1	AEFAQVMFNLIK		MP_MPAv1_NewWF_BGP_1_A.csv
	MP_MPAv1_NewWF_BGP_1_A.csv	758	Meta-Protein 1254	Metagenome unknown	root	1	2	contig1526000018_1	SLEEIVVEALR		MP_MPAv1_NewWF_BGP_1_A.csv
	MP_MPAv1_NewWF_BGP_1_A.csv	759	Meta-Protein 1255	Metagenome unknown	root	1	1	contig24958000003_1	IADVIVPEVFNPYVVQR		MP_MPAv1_NewWF_BGP_1_A.csv
	MP_MPAv1_NewWF_BGP_1_A.csv	760	Meta-Protein 202	Metagenome unknown	root	1	2	contig3105000066_1, ATB_B_contig048961	VEVVAIVIPSTPITITDNK		MP_MPAv1_NewWF_BGP_1_A.csv
	MP_MPAv1_NewWF_BGP_1_A.csv	761	Meta-Protein 1256	Metagenome unknown	root	1	1	contig48051000015_4	AILSNNPENLLDVLAK		MP_MPAv1_NewWF_BGP_1_A.csv
	MP_MPAv1_NewWF_BGP_1_A.csv	762	Meta-Protein 203	Metagenome unknown	root	7	10	contig612000075_2, contig4640000017_3, contig581000072_2, contig1344000040_1, contig139738000012_7, contig139847000013_51	ACFIDPFQGK, ACFLDPFQGK, AKNPDVIFAPSAATTAPLIIK, DFEGVTGIINFTEEGDADKNIAVIK, DFEGVTGIINFTEEGDADKNLAVIK, NPDVIFAPSAATTAPLIIKTVKDGQFVFVDSVEVK		MP_MPAv1_NewWF_BGP_1_A.csv
	MP_MPAv1_NewWF_BGP_1_A.csv	763	Meta-Protein 1257	Metagenome unknown	root	1	1	contig660000051_1	FGDLDNPFLVSIR		MP_MPAv1_NewWF_BGP_1_A.csv
	MP_MPAv1_NewWF_BGP_1_A.csv	764	Meta-Protein 1258	Metagenome unknown	root	1	1	contig202000013_23	GADDITVIGGGIIPDRDFQPLYDAGIK		MP_MPAv1_NewWF_BGP_1_A.csv
	MP_MPAv1_NewWF_BGP_1_A.csv	765	Meta-Protein 1259	Metagenome unknown	root	1	4	contig20313000051_1	FNEIQDEIFVEAIYQGR		MP_MPAv1_NewWF_BGP_1_A.csv
	MP_MPAv1_NewWF_BGP_1_A.csv	766	Meta-Protein 1260	Metagenome unknown	root	3	6	contig139252000015_24	GDAGSLISSIPDLVPEIMDK, GVEDTIREIASELEKIEPVAFIMLSEEEAR		MP_MPAv1_NewWF_BGP_1_A.csv
	MP_MPAv1_NewWF_BGP_1_A.csv	767	Meta-Protein 1261	Metagenome unknown	root	1	1	contig21000022_14	MFPGMGGIGGR		MP_MPAv1_NewWF_BGP_1_A.csv
	MP_MPAv1_NewWF_BGP_1_A.csv	768	Meta-Protein 1262	Metagenome unknown	root	1	1	contig139833000041_10	MEKLSLGDITVSVK		MP_MPAv1_NewWF_BGP_1_A.csv
	MP_MPAv1_NewWF_BGP_1_A.csv	769	Meta-Protein 1263	Metagenome unknown	root	1	1	contig17819000017_4	ALEFSNPVSVSFNPLESSLSK		MP_MPAv1_NewWF_BGP_1_A.csv
	MP_MPAv1_NewWF_BGP_1_A.csv	770	Meta-Protein 1264	Metagenome unknown	root	1	2	contig6837000003_2	LSIPQFDEELALQAIK		MP_MPAv1_NewWF_BGP_1_A.csv
	MP_MPAv1_NewWF_BGP_1_A.csv	771	Meta-Protein 1265	Metagenome unknown	root	2	3	contig465000024_3	KYDDIVFIVDAVSSAAGSKYDDIVFIVDAVSSAAGSK		MP_MPAv1_NewWF_BGP_1_A.csv
	MP_MPAv1_NewWF_BGP_1_A.csv	772	Meta-Protein 1266	Metagenome unknown	root	1	1	contig77000039_8	SAVLGGELVPVIVGSAIK		MP_MPAv1_NewWF_BGP_1_A.csv
	MP_MPAv1_NewWF_BGP_1_A.csv	773	Meta-Protein 204	Metagenome unknown	root	3	9	contig101000049_1, contig139421000027_9, contig11892000016_2	IIGENFFEVAGR, QGYDPQYDYEDNGLVILPERVGDTFTMPGANGVFEILPNSR		MP_MPAv1_NewWF_BGP_1_A.csv
	MP_MPAv1_NewWF_BGP_1_A.csv	774	Meta-Protein 1267	Metagenome unknown	root	1	1	contig8928000071_1	QSITDAELEFWLR		MP_MPAv1_NewWF_BGP_1_A.csv
	MP_MPAv1_NewWF_BGP_1_A.csv	775	Meta-Protein 1268	Metagenome unknown	root	2	3	contig1439000068_4	LQGLNQELEWDGENMVFTNIPENATVRVETASPFSEAGPFNEMVVMGVVAVR		MP_MPAv1_NewWF_BGP_1_A.csv
	MP_MPAv1_NewWF_BGP_1_A.csv	776	Meta-Protein 1269	Metagenome unknown	root	1	1	contig1077000061_4	TPELDARLVAENIANQLVK		MP_MPAv1_NewWF_BGP_1_A.csv
	MP_MPAv1_NewWF_BGP_1_A.csv	777	Meta-Protein 1270	Metagenome unknown	root	1	2	contig573000078_13	LVAELITPIAMEEGLR		MP_MPAv1_NewWF_BGP_1_A.csv
	MP_MPAv1_NewWF_BGP_1_A.csv	778	Meta-Protein 1271	Metagenome unknown	root	4	12	contig25000072_6	DAAAVINPILEVTPIGE, TPQQAIKDAAAVINPILEVTPIGE, VSSIDSPEAVEALSFLTTLVDKVVADYNAMQDEIYIVPTFVSR		MP_MPAv1_NewWF_BGP_1_A.csv
	MP_MPAv1_NewWF_BGP_1_A.csv	779	Meta-Protein 205	Metagenome unknown	root	2	3	contig1357000045_45, P17878	AGISLNDNFVKVLDLISYMAEVDAK		MP_MPAv1_NewWF_BGP_1_A.csv
	MP_MPAv1_NewWF_BGP_1_A.csv	780	Meta-Protein 206	Metagenome unknown	root	3	5	contig114113000063_1, contig1509000048_5, contig135913000019_1, contig45000020_1	AAIGFSDVSANDWFYDEIAK, AETVTMLDNALKAGYISGYQDGTVKPNQEISR		MP_MPAv1_NewWF_BGP_1_A.csv
	MP_MPAv1_NewWF_BGP_1_A.csv	781	Meta-Protein 1272	Metagenome unknown	root	1	1	contig139619000053_4	NPLLLLADEPTGTLDPMTAR		MP_MPAv1_NewWF_BGP_1_A.csv
	MP_MPAv1_NewWF_BGP_1_A.csv	782	Meta-Protein 207	Metagenome unknown	root	1	3	ATB_S_contig037112, contig27866000044_3	VIGSIDPVEVIAGGFK		MP_MPAv1_NewWF_BGP_1_A.csv
	MP_MPAv1_NewWF_BGP_1_A.csv	783	Meta-Protein 208	Metagenome unknown	root	3	3	contig642000075_9, contig139743000078_6	FFENTVAEIMDR, SLALFLIGEEPIEKSLALFLIGEEPLEK		MP_MPAv1_NewWF_BGP_1_A.csv
	MP_MPAv1_NewWF_BGP_1_A.csv	784	Meta-Protein 1273	Metagenome unknown	root	1	1	contig5842000014_1	DVELDPTFTWELR		MP_MPAv1_NewWF_BGP_1_A.csv
	MP_MPAv1_NewWF_BGP_1_A.csv	785	Meta-Protein 1274	Metagenome unknown	root	1	1	contig54344000033_28	AAVGDYVADQLEAIGFTTK		MP_MPAv1_NewWF_BGP_1_A.csv
	MP_MPAv1_NewWF_BGP_1_A.csv	786	Meta-Protein 209	Metagenome unknown	root	2	4	contig139252000015_79, contig139628000068_19, contig139244000058_47	IQLIEGDVWGHRKSIEMFLEMQR		MP_MPAv1_NewWF_BGP_1_A.csv
	MP_MPAv1_NewWF_BGP_1_A.csv	787	Meta-Protein 1275	Metagenome unknown	root	1	6	contig574000029_35	SNNFSLGIDIGSTTVK		MP_MPAv1_NewWF_BGP_1_A.csv
	MP_MPAv1_NewWF_BGP_1_A.csv	788	Meta-Protein 210	Metagenome unknown	root	1	2	contig8297000072_2, contig16000010_15	AMLTGAGLTIFDLGR		MP_MPAv1_NewWF_BGP_1_A.csv
	MP_MPAv1_NewWF_BGP_1_A.csv	789	Meta-Protein 1276	Metagenome unknown	root	1	2	contig1343000027_5	IVDGEVGFDELSEYAIGLK		MP_MPAv1_NewWF_BGP_1_A.csv
	MP_MPAv1_NewWF_BGP_1_A.csv	790	Meta-Protein 1277	Metagenome unknown	root	1	3	contig698000060_1	ALTAFEELVEENLGPAK		MP_MPAv1_NewWF_BGP_1_A.csv
	MP_MPAv1_NewWF_BGP_1_A.csv	791	Meta-Protein 1278	KRAF1_CAEBR Raf homolog serine/threonine-protein kinase OS=Caenorhabditis briggsae GN=lin-45 PE=3 SV=2	Caenorhabditis briggsae	1	1	Q61UC4	KDQGSPMASPSTPLYPK		MP_MPAv1_NewWF_BGP_1_A.csv
	MP_MPAv1_NewWF_BGP_1_A.csv	792	Meta-Protein 1279	Metagenome unknown	root	1	1	contig2146000015_3	EITIEEAEGNLDGLNFLAGK		MP_MPAv1_NewWF_BGP_1_A.csv
	MP_MPAv1_NewWF_BGP_1_A.csv	793	Meta-Protein 211	Metagenome unknown	root	12	76	contig3965000044_4, ATB_S_contig026262, contig59770000013_5, contig4549000067_5	ARLWDNVPGLANELNEALVK, AVFAMNDPEAIEAIEMWK, DIAAYEDEFVEYFLPYVK, DLFVQAGLPTPNELQNEGR, EVDFDYGWVFFPMGPR, IASYMADGMREYFTDGEGR, IEFVQVDWDGAEHR, ILASIIAGDPVGDLIYITNR, LDLYALPDHAK, LDPWPIEQEMAVYANGGGIIK, LWDNVPGLANELNEALVKSEMDAVAPVIQALLDEAYNK		MP_MPAv1_NewWF_BGP_1_A.csv
	MP_MPAv1_NewWF_BGP_1_A.csv	794	Meta-Protein 1280	Metagenome unknown	root	1	1	contig38668000069_6	ELDLLFTALDK		MP_MPAv1_NewWF_BGP_1_A.csv
	MP_MPAv1_NewWF_BGP_1_A.csv	795	Meta-Protein 1281	Metagenome unknown	root	1	1	contig14867000073_1	NAQDGISLIQTAEGSLNETHAILQR		MP_MPAv1_NewWF_BGP_1_A.csv
	MP_MPAv1_NewWF_BGP_1_A.csv	796	Meta-Protein 212	Metagenome unknown	root	3	5	ATB_S_contig042632, contig139238000016_4	ELFEPEGLEVLAGNIGGK, ILIDPFLTGNPLASKVVVLEPGKSFEL		MP_MPAv1_NewWF_BGP_1_A.csv
	MP_MPAv1_NewWF_BGP_1_A.csv	797	Meta-Protein 1282	Metagenome unknown	root	1	1	contig7209000027_2	ELLATFVPVFSAESVQK		MP_MPAv1_NewWF_BGP_1_A.csv
	MP_MPAv1_NewWF_BGP_1_A.csv	798	Meta-Protein 1283	Metagenome unknown	root	1	2	contig64539000053_1	AFLTETDVETLEGIMAK		MP_MPAv1_NewWF_BGP_1_A.csv
	MP_MPAv1_NewWF_BGP_1_A.csv	799	Meta-Protein 1284	Metagenome unknown	root	1	1	contig139208000033_5	AASLEEILTTADIITVHTPVTPETK		MP_MPAv1_NewWF_BGP_1_A.csv
	MP_MPAv1_NewWF_BGP_1_A.csv	800	Meta-Protein 1285	Metagenome unknown	root	1	1	contig138808000019_15	QTIGHLLMGFITGNSGQVLSSIIK		MP_MPAv1_NewWF_BGP_1_A.csv
	MP_MPAv1_NewWF_BGP_1_A.csv	801	Meta-Protein 1286	Metagenome unknown	root	1	2	contig139682000014_61	AAQPIFILR		MP_MPAv1_NewWF_BGP_1_A.csv
	MP_MPAv1_NewWF_BGP_1_A.csv	802	Meta-Protein 213	Metagenome unknown	root	2	5	contig2454000064_11, contig1130000073_1	AIELETGGVDIAYNIAPIDELRAVTGPLPPLVWASR		MP_MPAv1_NewWF_BGP_1_A.csv
	MP_MPAv1_NewWF_BGP_1_A.csv	803	Meta-Protein 214	ADH1_CLOSA NADPH-dependent butanol dehydrogenase OS=Clostridium saccharobutylicum GN=adh1 PE=3 SV=1	root	2	1	P13604, contig17000033_36	FIAIPSTSGTATEVTAFSVITDYKFLAIPSTSGTATEVTAFSVITDYK		MP_MPAv1_NewWF_BGP_1_A.csv
	MP_MPAv1_NewWF_BGP_1_A.csv	804	Meta-Protein 1287	Metagenome unknown	root	1	1	contig138967000050_1	IIYDLILEAVR		MP_MPAv1_NewWF_BGP_1_A.csv
	MP_MPAv1_NewWF_BGP_1_A.csv	805	Meta-Protein 1288	Metagenome unknown	root	1	1	contig248000004_23	GSLAGLLPYGDANAIVVDMAK		MP_MPAv1_NewWF_BGP_1_A.csv
	MP_MPAv1_NewWF_BGP_1_A.csv	806	Meta-Protein 215	Metagenome unknown	root	3	8	contig16873000014_1, contig125635000012_3, contig1439000068_3	SALEYQILDNERHPDAK, VSPGANSGVFYFAQEIPGEPIWKVSPGANSGVFYLAQEIPGEPIWK		MP_MPAv1_NewWF_BGP_1_A.csv
	MP_MPAv1_NewWF_BGP_1_A.csv	807	Meta-Protein 216	Metagenome unknown	root	1	3	ATB_S_contig027701, contig139483000012_1	ELPLLVLSGEADPVGGYGR		MP_MPAv1_NewWF_BGP_1_A.csv
	MP_MPAv1_NewWF_BGP_1_A.csv	808	Meta-Protein 1289	ZEB1_MAIZE Zein-beta OS=Zea mays PE=2 SV=1	Zea mays	2	34	P06673	MMDVQSVAQQLQMMMMDVQSVAQQLQMMMQLER		MP_MPAv1_NewWF_BGP_1_A.csv
	MP_MPAv1_NewWF_BGP_1_A.csv	809	Meta-Protein 1290	Metagenome unknown	root	1	1	contig7358000026_2	NAQDGISLIQTAEGSLNESHAILQR		MP_MPAv1_NewWF_BGP_1_A.csv
	MP_MPAv1_NewWF_BGP_1_A.csv	810	Meta-Protein 1291	Metagenome unknown	root	1	1	contig121000010_3	AGILGSFLTFGDPR		MP_MPAv1_NewWF_BGP_1_A.csv
	MP_MPAv1_NewWF_BGP_1_A.csv	811	Meta-Protein 217	Metagenome unknown	root	19	64	contig138978000039_6, contig139508000014_2, contig139798000078_64, contig139494000053_3, ATB_G30_contig046481	AAEGGEVVTHIASDNVLGGR, AAEIQVVGFDATDDAVK, AAEIQVVGFDATDDAVKAVQEGR, AGIPIITVDR, ERGQGFNEIITQYPEIEVVAR, FIPVALELVK, GKVVEIEGIPGTNAAR, GKVVELEGIPGTNAAR, GQGFNEIITQYPEIEVVAR, GVDLILVNPTDSAAVVPAILAANR, GVDLILVNPTDSSAVVPAILAANR, LMGQLGVEYAVK, MAGEFIAELLGGK, MAGEFIAELLGGKGK, QLAGIEDLIAR, VLDAQDDPARQLAGIEDLIAR, VLSGETVDKFIPVPLELVK, VVEIEGIPGTNAARVVELEGIPGTNAAR		MP_MPAv1_NewWF_BGP_1_A.csv
	MP_MPAv1_NewWF_BGP_1_A.csv	812	Meta-Protein 1292	Metagenome unknown	root	1	3	contig151000018_2	LGETWDFGQYIEPIVR		MP_MPAv1_NewWF_BGP_1_A.csv
	MP_MPAv1_NewWF_BGP_1_A.csv	813	Meta-Protein 1293	Metagenome unknown	root	2	4	contig139920000046_5	SGVEEVVLSAVTGLGELGKKTAADSLELETVSTLLLLEEIGK		MP_MPAv1_NewWF_BGP_1_A.csv
	MP_MPAv1_NewWF_BGP_1_A.csv	814	Meta-Protein 1294	Metagenome unknown	root	1	1	contig138991000060_6	DIEKDSALNNTIDILIK		MP_MPAv1_NewWF_BGP_1_A.csv
	MP_MPAv1_NewWF_BGP_1_A.csv	815	Meta-Protein 1295	Metagenome unknown	root	1	2	contig1267000025_2	EYVPLLVVGQGVEPVNLGVR		MP_MPAv1_NewWF_BGP_1_A.csv
	MP_MPAv1_NewWF_BGP_1_A.csv	816	Meta-Protein 1296	Metagenome unknown	root	1	1	contig509000061_1	QDVDLSEYINETVIFR		MP_MPAv1_NewWF_BGP_1_A.csv
	MP_MPAv1_NewWF_BGP_1_A.csv	817	Meta-Protein 1297	Metagenome unknown	root	1	5	contig808000043_6	GVVDPEMFVINYDQYIER		MP_MPAv1_NewWF_BGP_1_A.csv
	MP_MPAv1_NewWF_BGP_1_A.csv	818	Meta-Protein 1298	RS28_METAC 30S ribosomal protein S28e OS=Methanosarcina acetivorans (strain ATCC 35395 / DSM 2834 / JCM 12185 / C2A) GN=rps28e PE=3 SV=1	Methanosarcina acetivorans C2A	1	1	Q8TQL8	IGDILMLLETSR		MP_MPAv1_NewWF_BGP_1_A.csv
	MP_MPAv1_NewWF_BGP_1_A.csv	819	Meta-Protein 218	Metagenome unknown	root	19	71	contig46146000072_1, contig1209000055_30, contig3294000032_1, contig38136000070_4, contig7208000062_3, contig1879000028_1, contig59228000075_1, contig34095000000_1, contig5205000006_1, contig57933000018_1	AGVTQIIFGSPLGPDMTNSIR, AGVTQIIFGSPLGPDMVNSIR, AVLGIGPGDLSTLPK, DFEIAIPTIK, DFEIAIPTIKK, DIDFAWITNHYNNR, FDVGAYTAMSIDKDEK, GIPIYIGAQGPK, GIPVYIGAQGPK, HAYPTLAMIAANTDTIK, KTGEMEFFDYDGAK, LAESKDIDFAWITNHYNNR, LREGVIQIR, MLELAGEIGDGALINASNPK, MLELAGEIGDGALINASNPKDFEIAIPTIK, TAGSLVGDAEIDAFTIAGTPDTVK, TGEMEFFDYDGAK, TTYGIEFVPGSINVKTTYGIEFVPGSVNVK		MP_MPAv1_NewWF_BGP_1_A.csv
	MP_MPAv1_NewWF_BGP_1_A.csv	820	Meta-Protein 1299	Metagenome unknown	root	1	2	contig139021000050_20	AGDADIILAGGVENMSAAPYLLPK		MP_MPAv1_NewWF_BGP_1_A.csv
	MP_MPAv1_NewWF_BGP_1_A.csv	821	Meta-Protein 1300	Metagenome unknown	root	1	2	contig139217000056_1	TSDFVALIEDGVSFK		MP_MPAv1_NewWF_BGP_1_A.csv
	MP_MPAv1_NewWF_BGP_1_A.csv	822	Meta-Protein 219	Metagenome unknown	root	3	13	contig626000046_2, contig523000010_1	DAVDVALAVLKGEEVEAVK, FTVEDGLKDMADILMRVTGDNYDMGVQGAHYIVEK		MP_MPAv1_NewWF_BGP_1_A.csv
	MP_MPAv1_NewWF_BGP_1_A.csv	823	Meta-Protein 1301	Metagenome unknown	root	1	1	contig1026000029_2	GIEAFVAINEPLD		MP_MPAv1_NewWF_BGP_1_A.csv
	MP_MPAv1_NewWF_BGP_1_A.csv	824	Meta-Protein 1302	Metagenome unknown	root	1	3	contig16929000079_2	NILFGGEGLFDTVVTGPGK		MP_MPAv1_NewWF_BGP_1_A.csv
	MP_MPAv1_NewWF_BGP_1_A.csv	825	Meta-Protein 1303	Metagenome unknown	root	1	2	contig1688000064_1	NAQDGISLIQTAEGALQESHAILQR		MP_MPAv1_NewWF_BGP_1_A.csv
	MP_MPAv1_NewWF_BGP_1_A.csv	826	Meta-Protein 1304	Metagenome unknown	root	1	1	contig139624000044_1	VGIILPLTGSEAMFGTMEK		MP_MPAv1_NewWF_BGP_1_A.csv
	MP_MPAv1_NewWF_BGP_1_A.csv	827	Meta-Protein 1305	Metagenome unknown	root	1	1	contig19000053_60	ALMSLGFLDEDGILK		MP_MPAv1_NewWF_BGP_1_A.csv
	MP_MPAv1_NewWF_BGP_1_A.csv	828	Meta-Protein 220	CH60_CARHZ 60 kDa chaperonin OS=Carboxydothermus hydrogenoformans (strain ATCC BAA-161 / DSM 6008 / Z-2901) GN=groL PE=3 SV=1	root	2	1	Q3ADX3, contig919000053_4	ISAIADILPILEKISAIADLLPILEK		MP_MPAv1_NewWF_BGP_1_A.csv
	MP_MPAv1_NewWF_BGP_1_A.csv	829	Meta-Protein 1306	Metagenome unknown	root	1	1	contig139657000012_16	NTFPLSDVTLLDGPFK		MP_MPAv1_NewWF_BGP_1_A.csv
	MP_MPAv1_NewWF_BGP_1_A.csv	830	Meta-Protein 1307	Metagenome unknown	root	1	1	contig138554000018_18	AVNAVFESIQEALAAGEK		MP_MPAv1_NewWF_BGP_1_A.csv
	MP_MPAv1_NewWF_BGP_1_A.csv	831	Meta-Protein 1308	Metagenome unknown	root	1	1	contig4795000038_4	IEYYSTGEIQDIKPKFDYAAMPVLK		MP_MPAv1_NewWF_BGP_1_A.csv
	MP_MPAv1_NewWF_BGP_1_A.csv	832	Meta-Protein 1309	Metagenome unknown	root	2	2	contig18029000065_2	ESFLSDVMWMNQLKSLNATNDPLIVLDGIPFAGK		MP_MPAv1_NewWF_BGP_1_A.csv
	MP_MPAv1_NewWF_BGP_1_A.csv	833	Meta-Protein 1310	Metagenome unknown	root	1	2	contig134000036_8	VLADIDQAIALLPATQPEVGR		MP_MPAv1_NewWF_BGP_1_A.csv
	MP_MPAv1_NewWF_BGP_1_A.csv	834	Meta-Protein 1311	RBS1_FRIAG Ribulose bisphosphate carboxylase small chain 1/4, chloroplastic OS=Fritillaria agrestis GN=RBCS1 PE=2 SV=1	Fritillaria agrestis	1	1	O24634	ASSTMLSSVATAACAAPAQASMVAPFVGLK		MP_MPAv1_NewWF_BGP_1_A.csv
	MP_MPAv1_NewWF_BGP_1_A.csv	835	Meta-Protein 221	Metagenome unknown	root	4	11	contig2605000008_14, contig2042000064_4, contig86000006_1	AAALGVDEIDISSK, FGAQVAIETVNNALEK, IRDVDMAKEMMEFTKNAQDTISLIQTAEGALTESHAILQR		MP_MPAv1_NewWF_BGP_1_A.csv
	MP_MPAv1_NewWF_BGP_1_A.csv	836	Meta-Protein 1312	Metagenome unknown	root	1	1	contig139193000021_4	EVEGMCLVTTALFNNDYELLHDRIDIR		MP_MPAv1_NewWF_BGP_1_A.csv
	MP_MPAv1_NewWF_BGP_1_A.csv	837	Meta-Protein 1313	Metagenome unknown	root	1	1	contig11000033_84	NAQDGISLLQVAEGGLSEIHAMLQR		MP_MPAv1_NewWF_BGP_1_A.csv
	MP_MPAv1_NewWF_BGP_1_A.csv	838	Meta-Protein 1314	Metagenome unknown	root	1	1	contig3278000006_1	SSLLNRLTGAGVLVQNQLFATLD		MP_MPAv1_NewWF_BGP_1_A.csv
	MP_MPAv1_NewWF_BGP_1_A.csv	839	Meta-Protein 1315	Metagenome unknown	root	1	2	contig48000009_33	AATESILEVLFK		MP_MPAv1_NewWF_BGP_1_A.csv
	MP_MPAv1_NewWF_BGP_1_A.csv	840	Meta-Protein 1316	Metagenome unknown	root	1	1	contig139203000014_1	VIAQDLGVFFKDIA		MP_MPAv1_NewWF_BGP_1_A.csv
	MP_MPAv1_NewWF_BGP_1_A.csv	841	Meta-Protein 1317	Metagenome unknown	root	1	2	ATB_B_contig122332	ELGDAMFENILFK		MP_MPAv1_NewWF_BGP_1_A.csv
	MP_MPAv1_NewWF_BGP_1_A.csv	842	Meta-Protein 1318	Metagenome unknown	root	1	2	contig2436000017_5	IGVTLAEVTDPVL		MP_MPAv1_NewWF_BGP_1_A.csv
	MP_MPAv1_NewWF_BGP_1_A.csv	843	Meta-Protein 1319	Metagenome unknown	root	1	1	contig139276000069_4	INNTESDVSSIIDSIIK		MP_MPAv1_NewWF_BGP_1_A.csv
	MP_MPAv1_NewWF_BGP_1_A.csv	844	Meta-Protein 1320	Metagenome unknown	root	2	2	contig313000059_10	AYEVMDGETGQQILASLEPLNIKEFQVFDLPFIITDKDR		MP_MPAv1_NewWF_BGP_1_A.csv
	MP_MPAv1_NewWF_BGP_1_A.csv	845	Meta-Protein 1321	Metagenome unknown	root	1	1	contig1811000060_9	VDLFLAEADYILK		MP_MPAv1_NewWF_BGP_1_A.csv
	MP_MPAv1_NewWF_BGP_1_A.csv	846	Meta-Protein 1322	Metagenome unknown	root	1	1	contig35301000021_1	DDELLVTLAGPIK		MP_MPAv1_NewWF_BGP_1_A.csv
	MP_MPAv1_NewWF_BGP_1_A.csv	847	Meta-Protein 222	Metagenome unknown	root	1	2	contig139671000053_9, contig139671000053_1	ASIPEEMGLVTLPFANVGK		MP_MPAv1_NewWF_BGP_1_A.csv
	MP_MPAv1_NewWF_BGP_1_A.csv	848	Meta-Protein 223	Metagenome unknown	root	2	2	contig611000010_2, contig9514000047_1	NSYSSAVDKIQQGLQAKQVDTVQHPIFVNIVEAIK		MP_MPAv1_NewWF_BGP_1_A.csv
	MP_MPAv1_NewWF_BGP_1_A.csv	849	Meta-Protein 1323	Metagenome unknown	root	1	1	contig139429000075_5	ALILEVIDRDLASWGK		MP_MPAv1_NewWF_BGP_1_A.csv
	MP_MPAv1_NewWF_BGP_1_A.csv	850	Meta-Protein 1324	Metagenome unknown	root	1	2	contig2596000044_1	TDWEILDELMR		MP_MPAv1_NewWF_BGP_1_A.csv
	MP_MPAv1_NewWF_BGP_1_A.csv	851	Meta-Protein 1325	Metagenome unknown	root	1	3	contig3000070_27	LMSPFFPLEDLR		MP_MPAv1_NewWF_BGP_1_A.csv
	MP_MPAv1_NewWF_BGP_1_A.csv	852	Meta-Protein 1326	Metagenome unknown	root	1	1	contig139466000022_9	QVDQGGILGTLGDMFER		MP_MPAv1_NewWF_BGP_1_A.csv
	MP_MPAv1_NewWF_BGP_1_A.csv	853	Meta-Protein 1327	Metagenome unknown	root	1	3	contig15774000029_5	GTIDGLLVSSEVLESFK		MP_MPAv1_NewWF_BGP_1_A.csv
	MP_MPAv1_NewWF_BGP_1_A.csv	854	Meta-Protein 1328	Metagenome unknown	root	1	1	contig650000016_4	DAETAGLQDVLIYTLK		MP_MPAv1_NewWF_BGP_1_A.csv
	MP_MPAv1_NewWF_BGP_1_A.csv	855	Meta-Protein 1329	Metagenome unknown	root	1	1	contig7289000045_2	LGEWENVLGISYGDWQMR		MP_MPAv1_NewWF_BGP_1_A.csv
	MP_MPAv1_NewWF_BGP_1_A.csv	856	Meta-Protein 1330	Metagenome unknown	root	1	2	contig1243000004_5	YEQAWAQEEELFASVLNR		MP_MPAv1_NewWF_BGP_1_A.csv
	MP_MPAv1_NewWF_BGP_1_A.csv	857	Meta-Protein 224	Metagenome unknown	root	2	5	contig139272000069_22, contig488000000_1, contig389000005_4, contig1045000011_1	IVDIPVPITVGPAFEGEVIRLGELPPILNR		MP_MPAv1_NewWF_BGP_1_A.csv
	MP_MPAv1_NewWF_BGP_1_A.csv	858	Meta-Protein 1331	Metagenome unknown	root	1	1	contig1223000071_3	DGEYVPTFKDAFEAIVLR		MP_MPAv1_NewWF_BGP_1_A.csv
	MP_MPAv1_NewWF_BGP_1_A.csv	859	Meta-Protein 1332	Metagenome unknown	root	1	5	contig4178000021_1	QAGGPVFDWFDISAVGTR		MP_MPAv1_NewWF_BGP_1_A.csv
	MP_MPAv1_NewWF_BGP_1_A.csv	860	Meta-Protein 1333	Metagenome unknown	root	3	5	contig138887000025_6	NSPLWFAFFDK, QAGNNPYVVLGLLDSEENVNPTEDDNSELMAEVFSATEANLGGIGSEK		MP_MPAv1_NewWF_BGP_1_A.csv
	MP_MPAv1_NewWF_BGP_1_A.csv	861	Meta-Protein 225	Metagenome unknown	root	2	5	contig32933000063_4, contig54026000016_6	DVFEALKELQVPVIRIGLLVDEWGTWWDEEPGTVR		MP_MPAv1_NewWF_BGP_1_A.csv
	MP_MPAv1_NewWF_BGP_1_A.csv	862	Meta-Protein 1334	Metagenome unknown	root	1	1	contig139811000044_12	AAAPEAIVLALAGSEMVR		MP_MPAv1_NewWF_BGP_1_A.csv
	MP_MPAv1_NewWF_BGP_1_A.csv	863	Meta-Protein 226	Metagenome unknown	root	2	2	contig138552000059_60, contig96000018_152	EQLAVSAFAEALEVVPKTLAENAGLDSIDALVDLR		MP_MPAv1_NewWF_BGP_1_A.csv
	MP_MPAv1_NewWF_BGP_1_A.csv	864	Meta-Protein 227	ACDD1_METTE Acetyl-CoA decarbonylase/synthase complex subunit delta 1 OS=Methanosarcina thermophila GN=cdhD1 PE=1 SV=1	root	13	73	Q50538, contig5383000018_27, Q9C4Z1, Q8TJC2, Q8PRQ5, Q8TRZ8	ALPFFPDAPMPYR, AVKENYDDVMDNPGEWAK, DRIIMDPTTAALGYGLDYAYTNMER, ESWMVSSPLKEDSDWGPR, FNADMITIHLISTDPLIK, FNADMITIHLISTDPLIKDTSPK, HMTQTLFGSIEAEPVDIANWIGAEV, IAGMFGYPVSVGAPATAPAVSPALAAPK, IIMDPTTAALGYGLDYAYTNMER, LAALMGDDELTFPMSSGTTNAWGAR, NQVTIDVFDMR, TVEEVLQAVDVPIAIGGSGNPQKDPLVLAKYDHDVLSWTQLDMNAQK		MP_MPAv1_NewWF_BGP_1_A.csv
	MP_MPAv1_NewWF_BGP_1_A.csv	865	Meta-Protein 1335	Metagenome unknown	root	1	4	contig133917000057_1	NNILQQAATAMLA		MP_MPAv1_NewWF_BGP_1_A.csv
	MP_MPAv1_NewWF_BGP_1_A.csv	866	Meta-Protein 1336	Metagenome unknown	root	1	2	contig138590000001_1	YITEIYADTLEILSR		MP_MPAv1_NewWF_BGP_1_A.csv
	MP_MPAv1_NewWF_BGP_1_A.csv	867	Meta-Protein 1337	Metagenome unknown	root	1	1	contig139252000057_65	SLALNLLTDFQGELSTK		MP_MPAv1_NewWF_BGP_1_A.csv
	MP_MPAv1_NewWF_BGP_1_A.csv	868	Meta-Protein 1338	Metagenome unknown	root	1	1	contig12000071_14	KSWFCFDGAVVALGAAISSTAAVAVR		MP_MPAv1_NewWF_BGP_1_A.csv
	MP_MPAv1_NewWF_BGP_1_A.csv	869	Meta-Protein 228	Metagenome unknown	root	7	17	contig18280000010_2, contig2191000024_1	ATDTGAYQPALDTALQSGGSSAPDIYAAEAAFVLK, FFDAAEELKAK, GYAIISGDGDLWHAVENSSEK, IAQYTVDIGTRPSDK, NMTEFDEDINSFWR, SDGKLDFLGGQDMFEIFVPAGENASGKVGPGMDKFFDAAEELK		MP_MPAv1_NewWF_BGP_1_A.csv
	MP_MPAv1_NewWF_BGP_1_A.csv	870	Meta-Protein 229	Metagenome unknown	root	2	1	contig21201000057_1, contig138644000063_8	DADALLLITSLRDADALLLLTSLR		MP_MPAv1_NewWF_BGP_1_A.csv
	MP_MPAv1_NewWF_BGP_1_A.csv	871	Meta-Protein 1339	Metagenome unknown	root	1	2	contig36505000073_3	TILAEAIANGLEQGIISGR		MP_MPAv1_NewWF_BGP_1_A.csv
	MP_MPAv1_NewWF_BGP_1_A.csv	872	Meta-Protein 1340	Metagenome unknown	root	1	4	contig208000026_5	SMDVFVDAIAENEALIGR		MP_MPAv1_NewWF_BGP_1_A.csv
	MP_MPAv1_NewWF_BGP_1_A.csv	873	Meta-Protein 1341	Metagenome unknown	root	1	2	contig96000072_18	FVAYGLGIGDNGIIWDEIGR		MP_MPAv1_NewWF_BGP_1_A.csv
	MP_MPAv1_NewWF_BGP_1_A.csv	874	Meta-Protein 1342	Metagenome unknown	root	1	1	contig139642000075_20	NGGVQSGFMIPQYVAASLVSENKVLSHPASVDSIPSSANK		MP_MPAv1_NewWF_BGP_1_A.csv
	MP_MPAv1_NewWF_BGP_1_A.csv	875	Meta-Protein 1343	Metagenome unknown	root	1	5	contig7169000066_1	SFLMPVEDVFTITGR		MP_MPAv1_NewWF_BGP_1_A.csv
	MP_MPAv1_NewWF_BGP_1_A.csv	876	Meta-Protein 230	Metagenome unknown	root	1	1	contig88000065_4, contig10596000059_14	LIGPQDLFADVAFDR		MP_MPAv1_NewWF_BGP_1_A.csv
	MP_MPAv1_NewWF_BGP_1_A.csv	877	Meta-Protein 1344	Metagenome unknown	root	1	1	contig1746000016_4	WQVLEPIPELDEIADKLTR		MP_MPAv1_NewWF_BGP_1_A.csv
	MP_MPAv1_NewWF_BGP_1_A.csv	878	Meta-Protein 231	Metagenome unknown	root	4	10	contig8219000065_10, contig139434000056_4	ASDQDKVIEEAINEIIQPK, DLEPYEIVYYMYSTK, DNVAAEFTSIGAVTSEWERVMTVEDLEPILYEFK		MP_MPAv1_NewWF_BGP_1_A.csv
	MP_MPAv1_NewWF_BGP_1_A.csv	879	Meta-Protein 1345	Metagenome unknown	root	1	1	contig1357000045_33	AIYTGAPLSDVNQQVTVLEQVIAK		MP_MPAv1_NewWF_BGP_1_A.csv
	MP_MPAv1_NewWF_BGP_1_A.csv	880	Meta-Protein 1346	Metagenome unknown	root	2	5	contig336000016_4	NILEEAFQMVMGGSTVEAALAEAKVALDQVLETLPSVGTQGAFIGR		MP_MPAv1_NewWF_BGP_1_A.csv
	MP_MPAv1_NewWF_BGP_1_A.csv	881	Meta-Protein 232	Metagenome unknown	root	5	11	contig24041000006_2, contig19471000054_1, contig29907000012_14	EDIMDVLQR, LAQAWSVTTGDKNIR, LDMTPGEYQFIAWIDVNK, NGNQIEIANSTPLPLKNGNQIEIANSTPLPLKGGQFR		MP_MPAv1_NewWF_BGP_1_A.csv
	MP_MPAv1_NewWF_BGP_1_A.csv	882	Meta-Protein 233	Metagenome unknown	root	14	42	contig141000014_2, contig121000047_3, ATB_S_contig018071, contig121000047_2, contig965000064_2	AWSGTAVVIPVFAPQK, DGESQMWLYLPALGR, FAEPENPYEVR, GYYGDFDYQLGK, KPGLGHPELALR, LALEDELDSLGK, LAYDFNPDASADLVILYGTQEK, LKDGKLELDQLWLK, LMLEAGPQGAQLLEAIEGAK, MDEEGDAQFLEYLAPGDVR, MSSSALLGGDLRGEAVWAGR, QGPTGQEILDELSFR, TLTLSDFQLVSGELIPHRVSQEEVSPDIFTVR		MP_MPAv1_NewWF_BGP_1_A.csv
	MP_MPAv1_NewWF_BGP_1_A.csv	883	Meta-Protein 1347	Metagenome unknown	root	1	1	contig313000004_1	FLQLGEIAPGLDLVDGPR		MP_MPAv1_NewWF_BGP_1_A.csv
	MP_MPAv1_NewWF_BGP_1_A.csv	884	Meta-Protein 234	Metagenome unknown	root	1	2	contig3108000070_2, contig704000026_4	MAFDPQIEELLPELGR		MP_MPAv1_NewWF_BGP_1_A.csv
	MP_MPAv1_NewWF_BGP_1_A.csv	885	Meta-Protein 235	Metagenome unknown	root	1	3	contig1269000078_2, contig1539000063_5, ATB_S_contig068882	ADEAPVLIQVNEGILEVATTSR		MP_MPAv1_NewWF_BGP_1_A.csv
	MP_MPAv1_NewWF_BGP_1_A.csv	886	Meta-Protein 1348	Metagenome unknown	root	1	2	contig138924000076_39	MDGLTVPLLELGLK		MP_MPAv1_NewWF_BGP_1_A.csv
	MP_MPAv1_NewWF_BGP_1_A.csv	887	Meta-Protein 1349	Metagenome unknown	root	1	6	contig110981000021_1	EVDKPFLMPVEDVFSITGR		MP_MPAv1_NewWF_BGP_1_A.csv
	MP_MPAv1_NewWF_BGP_1_A.csv	888	Meta-Protein 1350	Metagenome unknown	root	1	1	contig1416000046_6	EFLAPFLPVPVVEK		MP_MPAv1_NewWF_BGP_1_A.csv
	MP_MPAv1_NewWF_BGP_1_A.csv	889	Meta-Protein 1351	Metagenome unknown	root	1	2	contig138644000063_23	FIEGVPEGVDVDLLPFVQK		MP_MPAv1_NewWF_BGP_1_A.csv
	MP_MPAv1_NewWF_BGP_1_A.csv	890	Meta-Protein 236	Metagenome unknown	root	7	10	contig139734000012_10, contig139678000004_4, contig139267000069_7, contig193000063_4, contig242000057_6	ALQFMDTLLEEDVHR, DVLAWDGYSYPK, HYEPYLDTLR, LANSGAVIGDQFPKLEGR, NYDNYLSVISTGR, TLDAYFDLLERTLDEFFDLLER		MP_MPAv1_NewWF_BGP_1_A.csv
	MP_MPAv1_NewWF_BGP_1_A.csv	891	Meta-Protein 1352	Metagenome unknown	root	1	2	contig139154000040_6	IYSLAAPVDEIISYYEDK		MP_MPAv1_NewWF_BGP_1_A.csv
	MP_MPAv1_NewWF_BGP_1_A.csv	892	Meta-Protein 1353	Metagenome unknown	root	1	2	ATB_G5_contig055901	AIGQDYVDSLLNALEK		MP_MPAv1_NewWF_BGP_1_A.csv
	MP_MPAv1_NewWF_BGP_1_A.csv	893	Meta-Protein 1354	Metagenome unknown	root	1	1	contig139487000078_6	EAAALELASVILAQGR		MP_MPAv1_NewWF_BGP_1_A.csv
	MP_MPAv1_NewWF_BGP_1_A.csv	894	Meta-Protein 1355	Metagenome unknown	root	2	2	contig59000011_33	GLTPEDILNYTEGETHNALLNGEAVFARSDIVSAEDAAILQSGQYTFDDLIALGEK		MP_MPAv1_NewWF_BGP_1_A.csv
	MP_MPAv1_NewWF_BGP_1_A.csv	895	Meta-Protein 1356	Metagenome unknown	root	1	1	contig146000050_8	QSWSFGDLDF		MP_MPAv1_NewWF_BGP_1_A.csv
	MP_MPAv1_NewWF_BGP_1_A.csv	896	Meta-Protein 1357	Metagenome unknown	root	1	1	contig138801000055_18	MDSYAPQLLDQGLLGMIGK		MP_MPAv1_NewWF_BGP_1_A.csv
	MP_MPAv1_NewWF_BGP_1_A.csv	897	Meta-Protein 1358	Metagenome unknown	root	1	1	contig4951000030_2	DNISETVLSFLK		MP_MPAv1_NewWF_BGP_1_A.csv
	MP_MPAv1_NewWF_BGP_1_A.csv	898	Meta-Protein 1359	Metagenome unknown	root	1	1	ATB_G5_contig025902	DLDVYYIPANELALELGTSK		MP_MPAv1_NewWF_BGP_1_A.csv
	MP_MPAv1_NewWF_BGP_1_A.csv	899	Meta-Protein 1360	Metagenome unknown	root	1	2	contig2677000027_5	AAIENAVETIIQTIR		MP_MPAv1_NewWF_BGP_1_A.csv
	MP_MPAv1_NewWF_BGP_1_A.csv	900	Meta-Protein 1361	EX7L_PSEFS Exodeoxyribonuclease 7 large subunit OS=Pseudomonas fluorescens (strain SBW25) GN=xseA PE=3 SV=1	Pseudomonas fluorescens SBW25	2	3	C3K1K5	APTPSAAAELLAPDASHLVRAPTPSAAAELLAPDASHLVRQ		MP_MPAv1_NewWF_BGP_1_A.csv
	MP_MPAv1_NewWF_BGP_1_A.csv	901	Meta-Protein 1362	Metagenome unknown	root	1	1	contig3420000063_1	FIEEDMYLFTVIPAVK		MP_MPAv1_NewWF_BGP_1_A.csv
	MP_MPAv1_NewWF_BGP_1_A.csv	902	Meta-Protein 1363	Metagenome unknown	root	2	3	contig139127000073_11	NHAPVHLSEFEMRSSEEFPLETVLTLEGGLR		MP_MPAv1_NewWF_BGP_1_A.csv
	MP_MPAv1_NewWF_BGP_1_A.csv	903	Meta-Protein 1364	Metagenome unknown	root	1	1	contig1368000022_5	EQAAVILANLLQLK		MP_MPAv1_NewWF_BGP_1_A.csv
	MP_MPAv1_NewWF_BGP_1_A.csv	904	Meta-Protein 1365	Metagenome unknown	root	1	1	contig140026000054_6	MIAGLEEISQGELYIGDNLVNDVAPK		MP_MPAv1_NewWF_BGP_1_A.csv
	MP_MPAv1_NewWF_BGP_1_A.csv	905	Meta-Protein 1366	Metagenome unknown	root	1	1	contig7096000035_1	VVFMEEIEESLFR		MP_MPAv1_NewWF_BGP_1_A.csv
	MP_MPAv1_NewWF_BGP_1_A.csv	906	Meta-Protein 1367	Metagenome unknown	root	1	2	contig138565000018_14	DLYENEFVALENGTLFK		MP_MPAv1_NewWF_BGP_1_A.csv
	MP_MPAv1_NewWF_BGP_1_A.csv	907	Meta-Protein 237	Metagenome unknown	root	3	6	contig436000076_6, contig10158000019_1	AIYEIVIDGVDEDAIR, FELKDVLAEYLTVWAIPIMEGEYIGEEEFGAVK		MP_MPAv1_NewWF_BGP_1_A.csv
	MP_MPAv1_NewWF_BGP_1_A.csv	908	Meta-Protein 1368	Metagenome unknown	root	1	1	contig3967000044_23	GVRSLMVEGGGETIFSFFQAGLVDR		MP_MPAv1_NewWF_BGP_1_A.csv
	MP_MPAv1_NewWF_BGP_1_A.csv	909	Meta-Protein 1369	Metagenome unknown	root	1	2	contig3728000059_1	DGIVNIGGFLALNDQELYQK		MP_MPAv1_NewWF_BGP_1_A.csv
	MP_MPAv1_NewWF_BGP_1_A.csv	910	Meta-Protein 1370	Metagenome unknown	root	1	2	contig223000061_1	SLSEAPGVSGYEFGLLELIK		MP_MPAv1_NewWF_BGP_1_A.csv
	MP_MPAv1_NewWF_BGP_1_A.csv	911	Meta-Protein 1371	Metagenome unknown	root	1	1	contig121000010_7	IDAVWAQDDDIALGVIEAVK		MP_MPAv1_NewWF_BGP_1_A.csv
	MP_MPAv1_NewWF_BGP_1_A.csv	912	Meta-Protein 1372	Metagenome unknown	root	1	1	contig139911000046_4	NILFGGEGLFLTTLEGPGK		MP_MPAv1_NewWF_BGP_1_A.csv
	MP_MPAv1_NewWF_BGP_1_A.csv	913	Meta-Protein 1373	Metagenome unknown	root	2	4	contig19000053_61	DLLMLLMAKSGTALGALTSDETGSLLEEIINQR		MP_MPAv1_NewWF_BGP_1_A.csv
	MP_MPAv1_NewWF_BGP_1_A.csv	914	Meta-Protein 238	Metagenome unknown	root	1	3	contig1057000073_3, contig873000056_12	IWPYASEEEALFDVLR		MP_MPAv1_NewWF_BGP_1_A.csv
	MP_MPAv1_NewWF_BGP_1_A.csv	915	Meta-Protein 1374	Metagenome unknown	root	1	1	contig139667000026_25	IPVPGVDEVDGLQGIFFR		MP_MPAv1_NewWF_BGP_1_A.csv
	MP_MPAv1_NewWF_BGP_1_A.csv	916	Meta-Protein 1375	Metagenome unknown	root	3	4	contig130055000003_6	EQLDLFNDLQAIAEGTR, LPDNLGDVLWPANFGLRSPADLLDSWLIGWK		MP_MPAv1_NewWF_BGP_1_A.csv
	MP_MPAv1_NewWF_BGP_1_A.csv	917	Meta-Protein 1376	Metagenome unknown	root	1	1	contig39000067_3	VLYDIIDFPLQIDSGR		MP_MPAv1_NewWF_BGP_1_A.csv
	MP_MPAv1_NewWF_BGP_1_A.csv	918	Meta-Protein 1377	Metagenome unknown	root	1	2	contig435000059_3	DVPDIFHYEAAQIIDFAR		MP_MPAv1_NewWF_BGP_1_A.csv
	MP_MPAv1_NewWF_BGP_1_A.csv	919	Meta-Protein 1378	Metagenome unknown	root	1	1	contig26000033_6	NQDYVLVDADYSQIELR		MP_MPAv1_NewWF_BGP_1_A.csv
	MP_MPAv1_NewWF_BGP_1_A.csv	920	Meta-Protein 1379	Metagenome unknown	root	1	3	contig139760000014_41	AAVEEGLVPGGGVALLSAIGVVSK		MP_MPAv1_NewWF_BGP_1_A.csv
	MP_MPAv1_NewWF_BGP_1_A.csv	921	Meta-Protein 1380	Metagenome unknown	root	1	2	contig111000048_77	SLWVPDNSEISSLIDFGK		MP_MPAv1_NewWF_BGP_1_A.csv
	MP_MPAv1_NewWF_BGP_1_A.csv	922	Meta-Protein 1381	Metagenome unknown	root	1	2	contig174000012_5	ETLDFLSSFLPK		MP_MPAv1_NewWF_BGP_1_A.csv
	MP_MPAv1_NewWF_BGP_1_A.csv	923	Meta-Protein 1382	Metagenome unknown	root	1	1	contig139226000057_29	SGAVDIVVVDSVAALVPR		MP_MPAv1_NewWF_BGP_1_A.csv
	MP_MPAv1_NewWF_BGP_1_A.csv	924	Meta-Protein 1383	Metagenome unknown	root	1	1	contig139109000047_11	ALVDEILENSEFLVK		MP_MPAv1_NewWF_BGP_1_A.csv
	MP_MPAv1_NewWF_BGP_1_A.csv	925	Meta-Protein 1384	Metagenome unknown	root	1	2	contig157000016_4	DLSEWSEIPNPLDPEGLAR		MP_MPAv1_NewWF_BGP_1_A.csv
	MP_MPAv1_NewWF_BGP_1_A.csv	926	Meta-Protein 1385	Metagenome unknown	root	1	2	contig50046000022_1	VLSDIIPLIDDFER		MP_MPAv1_NewWF_BGP_1_A.csv
	MP_MPAv1_NewWF_BGP_1_A.csv	927	Meta-Protein 1386	Metagenome unknown	root	1	1	contig7928000044_4	ITILEAIGLAGDLK		MP_MPAv1_NewWF_BGP_1_A.csv
	MP_MPAv1_NewWF_BGP_1_A.csv	928	Meta-Protein 1387	Metagenome unknown	root	1	1	contig139283000021_1	DGVSTVSPFVVLQ		MP_MPAv1_NewWF_BGP_1_A.csv
	MP_MPAv1_NewWF_BGP_1_A.csv	929	Meta-Protein 1388	Metagenome unknown	root	1	1	contig139540000068_35	QGVDTEEMLDLYSDMVVLER		MP_MPAv1_NewWF_BGP_1_A.csv
	MP_MPAv1_NewWF_BGP_1_A.csv	930	Meta-Protein 239	Metagenome unknown	root	5	11	contig130000071_6, contig138685000063_1	AEAGGTLEEVKAVAEK, GMLDAGVAGAVFTSPTPDQVFEAIK, KLEGFEVMVR, LDDELKELLDAQADTPAFRVALVSGGGSGHEPSHAGFVGK		MP_MPAv1_NewWF_BGP_1_A.csv
	MP_MPAv1_NewWF_BGP_1_A.csv	931	Meta-Protein 240	Metagenome unknown	root	2	5	contig2677000027_4, contig1517000016_2	ATNEISALSFALDETSQLQMRERDELLDLESGIIYQPVLGYFQAPDGTR		MP_MPAv1_NewWF_BGP_1_A.csv
	MP_MPAv1_NewWF_BGP_1_A.csv	932	Meta-Protein 1389	Metagenome unknown	root	1	2	contig806000015_2	GMLDGAVAGAVFTSPTPDQVFEAIK		MP_MPAv1_NewWF_BGP_1_A.csv
	MP_MPAv1_NewWF_BGP_1_A.csv	933	Meta-Protein 241	Metagenome unknown	root	7	10	contig517000001_11, contig632000031_3, contig116767000040_2, contig139381000077_1, contig131942000044_4, contig5953000011_3	FALENNIVDGVLAVK, FALENNIVDGVLAVKK, GANLLNAAVAAGAVATEPANPK, GCDAMGIYELAK, GCDAMGLYELAK, MFGHTPGVDLELPVLALVEEQAERQADLACGNWGVIGDK		MP_MPAv1_NewWF_BGP_1_A.csv
	MP_MPAv1_NewWF_BGP_1_A.csv	934	Meta-Protein 242	Metagenome unknown	root	1	2	contig526000052_12, Q8Q0F2	ASETDFETFMQEAILGR		MP_MPAv1_NewWF_BGP_1_A.csv
	MP_MPAv1_NewWF_BGP_1_A.csv	935	Meta-Protein 1390	Metagenome unknown	root	1	1	contig1343000027_21	LGLFDPDEEVPYAQLPYEILASDEHR		MP_MPAv1_NewWF_BGP_1_A.csv
	MP_MPAv1_NewWF_BGP_1_A.csv	936	Meta-Protein 1391	Metagenome unknown	root	2	6	contig139074000039_59	DLLISIAETAMTGKTLAENAGLDPIDMLMELR		MP_MPAv1_NewWF_BGP_1_A.csv
	MP_MPAv1_NewWF_BGP_1_A.csv	937	Meta-Protein 1392	Metagenome unknown	root	1	1	contig9147000013_85	SGNFIDATSFGILEFVK		MP_MPAv1_NewWF_BGP_1_A.csv
	MP_MPAv1_NewWF_BGP_1_A.csv	938	Meta-Protein 1393	Metagenome unknown	root	1	3	contig139697000054_2	FFGLTIEEIFQEDEYR		MP_MPAv1_NewWF_BGP_1_A.csv
	MP_MPAv1_NewWF_BGP_1_A.csv	939	Meta-Protein 1394	Metagenome unknown	root	1	1	contig50037000060_2	VIIPVDLFGLPADYPR		MP_MPAv1_NewWF_BGP_1_A.csv
	MP_MPAv1_NewWF_BGP_1_A.csv	940	Meta-Protein 1395	Metagenome unknown	root	1	2	contig556000024_3	ELPLEDFILGVR		MP_MPAv1_NewWF_BGP_1_A.csv
	MP_MPAv1_NewWF_BGP_1_A.csv	941	Meta-Protein 243	Metagenome unknown	root	4	9	contig7944000041_5, contig69205000016_3, contig139101000034_5, contig5704000036_3	AFGVLVEEDGVALR, QIMPTFTMDAYDAK, VGDYITIEEILSVGDYITLEEILS		MP_MPAv1_NewWF_BGP_1_A.csv
	MP_MPAv1_NewWF_BGP_1_A.csv	942	Meta-Protein 1396	Metagenome unknown	root	1	1	contig3687000011_1	EMLDDIDWLTGYLQQK		MP_MPAv1_NewWF_BGP_1_A.csv
	MP_MPAv1_NewWF_BGP_1_A.csv	943	Meta-Protein 1397	Metagenome unknown	root	1	3	contig765000060_1	VGNTAPVPLDMLEGILAK		MP_MPAv1_NewWF_BGP_1_A.csv
	MP_MPAv1_NewWF_BGP_1_A.csv	944	Meta-Protein 1398	Metagenome unknown	root	1	1	contig139069000062_12	IVELWTPIFDEFDK		MP_MPAv1_NewWF_BGP_1_A.csv
	MP_MPAv1_NewWF_BGP_1_A.csv	945	Meta-Protein 1399	Metagenome unknown	root	1	2	contig139594000067_27	LLFTMNEPAAIEALEFVR		MP_MPAv1_NewWF_BGP_1_A.csv
	MP_MPAv1_NewWF_BGP_1_A.csv	946	Meta-Protein 1400	Metagenome unknown	root	1	1	contig138306000031_7	LGELDTEMIEEFFR		MP_MPAv1_NewWF_BGP_1_A.csv
	MP_MPAv1_NewWF_BGP_1_A.csv	947	Meta-Protein 244	Metagenome unknown	root	2	3	contig64764000032_1, contig3146000018_7	ALEAAAAILEESPYLEMLEERNSTDLEDIFIAHIAGMDVFAR		MP_MPAv1_NewWF_BGP_1_A.csv
	MP_MPAv1_NewWF_BGP_1_A.csv	948	Meta-Protein 1401	Metagenome unknown	root	1	1	contig139208000033_6	SLDVAVLQDQLLAPILK		MP_MPAv1_NewWF_BGP_1_A.csv
	MP_MPAv1_NewWF_BGP_1_A.csv	949	Meta-Protein 1402	Metagenome unknown	root	1	1	contig10895000076_3	TGDELEAIFTVADALR		MP_MPAv1_NewWF_BGP_1_A.csv
	MP_MPAv1_NewWF_BGP_1_A.csv	950	Meta-Protein 1403	Metagenome unknown	root	2	4	contig1364000078_2	VLQILEQLAADVEELKVLQILEQLAADVEELKQAQR		MP_MPAv1_NewWF_BGP_1_A.csv
	MP_MPAv1_NewWF_BGP_1_A.csv	951	Meta-Protein 1404	Metagenome unknown	root	1	1	contig1340000075_18	GAATNAVQIAEVLVKENLI		MP_MPAv1_NewWF_BGP_1_A.csv
	MP_MPAv1_NewWF_BGP_1_A.csv	952	Meta-Protein 245	Metagenome unknown	root	5	6	ATB_G5_contig068091, contig139592000027_9, contig25081000039_2	AGDEVVQLYIR, AGDEVVQLYLR, SEELTGQKPLLGQVLLVGETLELPR, SLDQLPPFTDYSMEGRVYPALVEAVAQGLISEEEIDR		MP_MPAv1_NewWF_BGP_1_A.csv
	MP_MPAv1_NewWF_BGP_1_A.csv	953	Meta-Protein 1405	Metagenome unknown	root	1	1	contig139252000015_57	IEETAPFVDFFIIR		MP_MPAv1_NewWF_BGP_1_A.csv
	MP_MPAv1_NewWF_BGP_1_A.csv	954	Meta-Protein 1406	Metagenome unknown	root	1	1	contig1706000042_1	IFQANISALQETAQVLETEALER		MP_MPAv1_NewWF_BGP_1_A.csv
	MP_MPAv1_NewWF_BGP_1_A.csv	955	Meta-Protein 246	Metagenome unknown	root	1	5	contig93447000011_1, contig1291000048_9	EPVPIAQVLYEMVPR		MP_MPAv1_NewWF_BGP_1_A.csv
	MP_MPAv1_NewWF_BGP_1_A.csv	956	Meta-Protein 1407	Metagenome unknown	root	1	2	contig41248000030_1	YSYDALLESTLGLTIIEEGK		MP_MPAv1_NewWF_BGP_1_A.csv
	MP_MPAv1_NewWF_BGP_1_A.csv	957	Meta-Protein 1408	Metagenome unknown	root	1	1	contig139199000069_3	NFGDLFPVLDVETPIEPK		MP_MPAv1_NewWF_BGP_1_A.csv
	MP_MPAv1_NewWF_BGP_1_A.csv	958	Meta-Protein 1409	Metagenome unknown	root	1	2	contig138630000035_3	QLNEFLPDGIELSEDDISSLIR		MP_MPAv1_NewWF_BGP_1_A.csv
	MP_MPAv1_NewWF_BGP_1_A.csv	959	Meta-Protein 1410	Metagenome unknown	root	1	1	contig846000076_3	IVELWTPIFDEFDR		MP_MPAv1_NewWF_BGP_1_A.csv
	MP_MPAv1_NewWF_BGP_1_A.csv	960	Meta-Protein 247	Metagenome unknown	root	7	27	contig3859000061_2, ATB_S_contig057341, contig9489000057_1, contig59463000075_1, ATB_G30_contig082961, contig139069000062_56, contig7328000067_1	EKIQEVLDDQY, FIKEAVESVMLENMDTR, FMELPYMDVFMNDMER, GHIVFLHENGYQFER, IDNPEFFESGEWR, LRIDNPEFFESGEWRLVIREGDIIVR		MP_MPAv1_NewWF_BGP_1_A.csv
	MP_MPAv1_NewWF_BGP_1_A.csv	961	Meta-Protein 1411	Metagenome unknown	root	1	1	contig50893000045_1	VLFIDAFTFDDIAPVAK		MP_MPAv1_NewWF_BGP_1_A.csv
	MP_MPAv1_NewWF_BGP_1_A.csv	962	Meta-Protein 1412	Metagenome unknown	root	1	1	contig18954000011_11	SIDTEVIFLPAASFLER		MP_MPAv1_NewWF_BGP_1_A.csv
	MP_MPAv1_NewWF_BGP_1_A.csv	963	Meta-Protein 1413	Metagenome unknown	root	1	4	contig8000024_6	DVITDYPITYLIISPR		MP_MPAv1_NewWF_BGP_1_A.csv
	MP_MPAv1_NewWF_BGP_1_A.csv	964	Meta-Protein 1414	Metagenome unknown	root	1	1	contig139371000048_3	GGIFNEDDLPEQVLTVLGR		MP_MPAv1_NewWF_BGP_1_A.csv
	MP_MPAv1_NewWF_BGP_1_A.csv	965	Meta-Protein 1415	Metagenome unknown	root	1	1	contig139260000069_7	TESLSTVLEVIALVK		MP_MPAv1_NewWF_BGP_1_A.csv
	MP_MPAv1_NewWF_BGP_1_A.csv	966	Meta-Protein 248	Metagenome unknown	root	8	13	contig139039000060_15, contig2217000073_2	CKEMANAMLDEGVDVIWLAAGR, CKEMANAMLDEGVDVLWLAAGR, EGALGYSHNLIPADIIEEVDKLAER, EMANAMLDEGVDVIWLAAGR, EMANAMLDEGVDVLWLAAGR, FAIVDTAVDAPNVASYVYR, SGLGGIMAAEERYSYVGDWADPAK		MP_MPAv1_NewWF_BGP_1_A.csv
	MP_MPAv1_NewWF_BGP_1_A.csv	967	Meta-Protein 1416	Metagenome unknown	root	1	1	contig147000005_10	GIAQEYNVVVEEVLTGFK		MP_MPAv1_NewWF_BGP_1_A.csv
	MP_MPAv1_NewWF_BGP_1_A.csv	968	Meta-Protein 1417	Metagenome unknown	root	1	2	contig111666000032_2	LPVDPIGDLLASIK		MP_MPAv1_NewWF_BGP_1_A.csv
	MP_MPAv1_NewWF_BGP_1_A.csv	969	Meta-Protein 1418	Metagenome unknown	root	1	1	contig1128000015_1	SETIFDPYAQITYQEAVTMLVR		MP_MPAv1_NewWF_BGP_1_A.csv
	MP_MPAv1_NewWF_BGP_1_A.csv	970	Meta-Protein 1419	Metagenome unknown	root	1	2	contig5874000014_4	GAADVLQALENELGVSR		MP_MPAv1_NewWF_BGP_1_A.csv
	MP_MPAv1_NewWF_BGP_1_A.csv	971	Meta-Protein 1420	Metagenome unknown	root	1	2	contig168000078_3	LLVDYLMSAEGQSELGTALGTLR		MP_MPAv1_NewWF_BGP_1_A.csv
	MP_MPAv1_NewWF_BGP_1_A.csv	972	Meta-Protein 1421	Metagenome unknown	root	1	1	contig125958000058_4	NAEFVALTQQILDAAIK		MP_MPAv1_NewWF_BGP_1_A.csv
	MP_MPAv1_NewWF_BGP_1_A.csv	973	Meta-Protein 1422	Metagenome unknown	root	1	2	contig35000055_28	DALLPINAVLGDAYFDEAR		MP_MPAv1_NewWF_BGP_1_A.csv
	MP_MPAv1_NewWF_BGP_1_A.csv	974	Meta-Protein 1423	Metagenome unknown	root	1	1	contig3545000065_1	ELLKEVLEIAVSDFTK		MP_MPAv1_NewWF_BGP_1_A.csv
	MP_MPAv1_NewWF_BGP_1_A.csv	975	Meta-Protein 1424	Metagenome unknown	root	1	2	contig139803000041_5	VDKLDAIADDLVNSLSPSEPLLNSWPGR		MP_MPAv1_NewWF_BGP_1_A.csv
	MP_MPAv1_NewWF_BGP_1_A.csv	976	Meta-Protein 249	Metagenome unknown	root	1	2	contig478000041_30, contig138971000071_17	SGDIDPAIVFFLMEK		MP_MPAv1_NewWF_BGP_1_A.csv
	MP_MPAv1_NewWF_BGP_1_A.csv	977	Meta-Protein 1425	Metagenome unknown	root	1	1	contig8669000075_2	AEVDAELQELIDLFGGKEEFQQQLQR		MP_MPAv1_NewWF_BGP_1_A.csv
	MP_MPAv1_NewWF_BGP_1_A.csv	978	Meta-Protein 1426	Metagenome unknown	root	1	1	contig598000079_3	EYYVPEGLEGELLEAWIR		MP_MPAv1_NewWF_BGP_1_A.csv
	MP_MPAv1_NewWF_BGP_1_A.csv	979	Meta-Protein 250	Metagenome unknown	root	3	5	contig6059000048_2, contig114000054_1	DFSTPLDLILR, EGEGFGDEVESLVVLRGAFDDINLDATFVK		MP_MPAv1_NewWF_BGP_1_A.csv
	MP_MPAv1_NewWF_BGP_1_A.csv	980	Meta-Protein 1427	Metagenome unknown	root	1	7	contig139106000000_2	AGVLQEAMELFNIGGYEK		MP_MPAv1_NewWF_BGP_1_A.csv
	MP_MPAv1_NewWF_BGP_1_A.csv	981	Meta-Protein 1428	Metagenome unknown	root	1	1	ATB_S_contig080533	ELEEVLVIDEMTGALNFR		MP_MPAv1_NewWF_BGP_1_A.csv
	MP_MPAv1_NewWF_BGP_1_A.csv	982	Meta-Protein 251	Metagenome unknown	root	6	27	ATB_G5_contig044761, contig20099000042_3, ATB_S_contig053961	ATLSYEVMENIAVQGTVK, FGFTLIPGPK, MTLVADVGYAPR, TETLLTLGGLYR, VASEEDLQIFIGGGYAMLTLTEKVSVEGDASYLMGFGDNK		MP_MPAv1_NewWF_BGP_1_A.csv
	MP_MPAv1_NewWF_BGP_1_A.csv	983	Meta-Protein 1429	Metagenome unknown	root	1	1	contig5000017_13	SALSYPPGSAIAREIAQEIEPLIADEDEAK		MP_MPAv1_NewWF_BGP_1_A.csv
	MP_MPAv1_NewWF_BGP_1_A.csv	984	Meta-Protein 1430	Metagenome unknown	root	1	1	contig73000079_7	SLSDETFLFLDSDDLSFTLR		MP_MPAv1_NewWF_BGP_1_A.csv
	MP_MPAv1_NewWF_BGP_1_A.csv	985	Meta-Protein 1431	Metagenome unknown	root	1	1	contig20033000069_1	IGIIDTGLDSVGEIVAVMK		MP_MPAv1_NewWF_BGP_1_A.csv
	MP_MPAv1_NewWF_BGP_1_A.csv	986	Meta-Protein 1432	Metagenome unknown	root	2	8	contig2074000012_4	AVDNVNEIIAPALIGMVALDQRGLSTAVGDEGGFAPNLAGGTEEAIDSILTAIR		MP_MPAv1_NewWF_BGP_1_A.csv
	MP_MPAv1_NewWF_BGP_1_A.csv	987	Meta-Protein 1433	Metagenome unknown	root	1	2	contig7984000045_1	FAADAREEGFDEIADVLEAIAR		MP_MPAv1_NewWF_BGP_1_A.csv
	MP_MPAv1_NewWF_BGP_1_A.csv	988	Meta-Protein 1434	Metagenome unknown	root	1	2	contig97000024_5	DLLYMVESIPADSTWTAAAVGR		MP_MPAv1_NewWF_BGP_1_A.csv
	MP_MPAv1_NewWF_BGP_1_A.csv	989	Meta-Protein 1435	Metagenome unknown	root	1	1	contig46505000034_2	DTTPGQILSVFENLAMK		MP_MPAv1_NewWF_BGP_1_A.csv
	MP_MPAv1_NewWF_BGP_1_A.csv	990	Meta-Protein 1436	Metagenome unknown	root	1	1	contig535000018_12	DAENALNAFMESVQEALVKGEK		MP_MPAv1_NewWF_BGP_1_A.csv
	MP_MPAv1_NewWF_BGP_1_A.csv	991	Meta-Protein 1437	Metagenome unknown	root	1	1	contig139522000016_104	IEETISPVALETIGNWISEHTQ		MP_MPAv1_NewWF_BGP_1_A.csv
	MP_MPAv1_NewWF_BGP_1_A.csv	992	Meta-Protein 1438	Metagenome unknown	root	2	2	contig10410000067_1	LIVEDEVDFLLAPISTAFLKNDLVPLLEDAGIEVVFDK		MP_MPAv1_NewWF_BGP_1_A.csv
	MP_MPAv1_NewWF_BGP_1_A.csv	993	Meta-Protein 252	Metagenome unknown	root	1	6	ATB_S_contig052952, contig45107000035_1	NAQDAISLVQTAEGALNETQAILQR		MP_MPAv1_NewWF_BGP_1_A.csv
	MP_MPAv1_NewWF_BGP_1_A.csv	994	Meta-Protein 1439	Metagenome unknown	root	1	2	contig38726000047_19	LIVEYPLSIL		MP_MPAv1_NewWF_BGP_1_A.csv
	MP_MPAv1_NewWF_BGP_1_A.csv	995	Meta-Protein 1440	Metagenome unknown	root	1	2	contig67019000023_1	EAQVLEELYILLR		MP_MPAv1_NewWF_BGP_1_A.csv
	MP_MPAv1_NewWF_BGP_1_A.csv	996	Meta-Protein 253	Metagenome unknown	root	1	5	contig750000062_15, contig1874000051_9	TPETDAQLVAESIAFALER		MP_MPAv1_NewWF_BGP_1_A.csv
	MP_MPAv1_NewWF_BGP_1_A.csv	997	Meta-Protein 254	Metagenome unknown	root	2	1	contig624000010_8, contig58613000017_3	NSEAALNAFISSVEDALKNSEAALNAFLSSVEDALK		MP_MPAv1_NewWF_BGP_1_A.csv
	MP_MPAv1_NewWF_BGP_1_A.csv	998	Meta-Protein 1441	Metagenome unknown	root	1	1	contig158000002_7	DFNEKEVLEILLNDITK		MP_MPAv1_NewWF_BGP_1_A.csv
	MP_MPAv1_NewWF_BGP_1_A.csv	999	Meta-Protein 255	Metagenome unknown	root	1	3	ATB_S_contig047113, contig13476000025_3	ALVNEPDVLLLDEPLAALDLK		MP_MPAv1_NewWF_BGP_1_A.csv
	MP_MPAv1_NewWF_BGP_1_A.csv	1000	Meta-Protein 1442	Metagenome unknown	root	1	2	ATB_B_contig011542	DNVLQVLEEALR		MP_MPAv1_NewWF_BGP_1_A.csv
	MP_MPAv1_NewWF_BGP_1_A.csv	1001	Meta-Protein 256	Metagenome unknown	root	5	17	ATB_G5_contig085121, contig139237000074_68, contig960000075_50	DAYGLLLSSIDDQNPVVFIENK, IAKEGTDVTIITYGK, QVYDALEAAENLAKDEINAEVIDLR, VGALNTPIPFATDLESYVVPNARVLYAMQNDVDENELKPIPLGK		MP_MPAv1_NewWF_BGP_1_A.csv
	MP_MPAv1_NewWF_BGP_1_A.csv	1002	Meta-Protein 1443	Metagenome unknown	root	1	2	contig93673000021_3	ALGEFDPNLFYIVEDLR		MP_MPAv1_NewWF_BGP_1_A.csv
	MP_MPAv1_NewWF_BGP_1_A.csv	1003	Meta-Protein 1444	Metagenome unknown	root	1	5	contig580000049_5	VSESAGVTLTEILEEYGLEISR		MP_MPAv1_NewWF_BGP_1_A.csv
	MP_MPAv1_NewWF_BGP_1_A.csv	1004	Meta-Protein 1445	Metagenome unknown	root	1	1	contig7071000023_25	LGDFDTELIEEFLR		MP_MPAv1_NewWF_BGP_1_A.csv
	MP_MPAv1_NewWF_BGP_1_A.csv	1005	Meta-Protein 1446	Metagenome unknown	root	1	2	contig139165000000_13	EVYTLLQDAAVNFIGNVEGR		MP_MPAv1_NewWF_BGP_1_A.csv
	MP_MPAv1_NewWF_BGP_1_A.csv	1006	Meta-Protein 257	Metagenome unknown	root	2	2	contig139024000003_5, contig139849000029_248	VGDILDLAAALDIVNKVGDILDLAAALDLVNK		MP_MPAv1_NewWF_BGP_1_A.csv
	MP_MPAv1_NewWF_BGP_1_A.csv	1007	Meta-Protein 1447	Metagenome unknown	root	1	5	contig1302000007_2	SVIPNPELVQELLALAAEK		MP_MPAv1_NewWF_BGP_1_A.csv
	MP_MPAv1_NewWF_BGP_1_A.csv	1008	Meta-Protein 1448	Metagenome unknown	root	1	1	contig1190000007_2	GLDAGTAYEILSIDIADVDVGR		MP_MPAv1_NewWF_BGP_1_A.csv
	MP_MPAv1_NewWF_BGP_1_A.csv	1009	Meta-Protein 258	Metagenome unknown	root	1	1	contig139579000078_3, contig139154000073_3	AVEEIATLIANLED		MP_MPAv1_NewWF_BGP_1_A.csv
	MP_MPAv1_NewWF_BGP_1_A.csv	1010	Meta-Protein 1449	Metagenome unknown	root	1	2	contig138973000071_33	MDFGSFLSAPEIK		MP_MPAv1_NewWF_BGP_1_A.csv
	MP_MPAv1_NewWF_BGP_1_A.csv	1011	Meta-Protein 1450	Metagenome unknown	root	1	1	contig255000037_7	LEIPEGIDVINQWIDLSGNR		MP_MPAv1_NewWF_BGP_1_A.csv
	MP_MPAv1_NewWF_BGP_1_A.csv	1012	Meta-Protein 1451	Metagenome unknown	root	1	5	contig139045000003_44	VGDQVIYEVVEDVLVDGR		MP_MPAv1_NewWF_BGP_1_A.csv
	MP_MPAv1_NewWF_BGP_1_A.csv	1013	Meta-Protein 1452	Metagenome unknown	root	1	1	contig139729000012_35	CGNLGTSPVIDLVLDER		MP_MPAv1_NewWF_BGP_1_A.csv
	MP_MPAv1_NewWF_BGP_1_A.csv	1014	Meta-Protein 259	Metagenome unknown	root	1	3	contig2934000010_7, contig72034000034_2	DGEFVPASWDEALDLIATR		MP_MPAv1_NewWF_BGP_1_A.csv
	MP_MPAv1_NewWF_BGP_1_A.csv	1015	Meta-Protein 1453	Metagenome unknown	root	1	1	contig31000003_6	IIGILPLMVEFEPDGITEK		MP_MPAv1_NewWF_BGP_1_A.csv
	MP_MPAv1_NewWF_BGP_1_A.csv	1016	Meta-Protein 1454	Metagenome unknown	root	1	1	contig672000012_3	DGLEQIADLFLK		MP_MPAv1_NewWF_BGP_1_A.csv
	MP_MPAv1_NewWF_BGP_1_A.csv	1017	Meta-Protein 1455	Metagenome unknown	root	1	1	contig139619000053_11	NLDPETVELISIGVASALR		MP_MPAv1_NewWF_BGP_1_A.csv
	MP_MPAv1_NewWF_BGP_1_A.csv	1018	Meta-Protein 1456	Metagenome unknown	root	1	4	contig2306000039_5	MPDLNAASIESAISMVVGTAK		MP_MPAv1_NewWF_BGP_1_A.csv
	MP_MPAv1_NewWF_BGP_1_A.csv	1019	Meta-Protein 1457	Metagenome unknown	root	1	2	contig107323000041_4	DIGLDLLQFIK		MP_MPAv1_NewWF_BGP_1_A.csv
	MP_MPAv1_NewWF_BGP_1_A.csv	1020	Meta-Protein 1458	Metagenome unknown	root	1	1	contig138960000060_10	IPELILTSTMVMDSLTDEEKEIFR		MP_MPAv1_NewWF_BGP_1_A.csv
	MP_MPAv1_NewWF_BGP_1_A.csv	1021	Meta-Protein 1459	Metagenome unknown	root	1	2	ATB_S_contig138861	IDASFIIDQLDYLAR		MP_MPAv1_NewWF_BGP_1_A.csv
	MP_MPAv1_NewWF_BGP_1_A.csv	1022	Meta-Protein 1460	Metagenome unknown	root	1	1	contig138927000076_24	TVEAANEIEDTFKDMDGVDDIGNERPVVEAIINISK		MP_MPAv1_NewWF_BGP_1_A.csv
	MP_MPAv1_NewWF_BGP_1_A.csv	1023	Meta-Protein 1461	Metagenome unknown	root	1	3	contig1163000018_1	QELLEAIVNQYILDGLSK		MP_MPAv1_NewWF_BGP_1_A.csv
	MP_MPAv1_NewWF_BGP_1_A.csv	1024	Meta-Protein 1462	Metagenome unknown	root	1	2	contig182000072_2	MGGAYAPLDIIGDFLR		MP_MPAv1_NewWF_BGP_1_A.csv
	MP_MPAv1_NewWF_BGP_1_A.csv	1025	Meta-Protein 1463	Metagenome unknown	root	2	5	contig1983000062_2	IYSIALPAEAIATLAEMPDGIISELEEITVATWVR		MP_MPAv1_NewWF_BGP_1_A.csv
	MP_MPAv1_NewWF_BGP_1_A.csv	1026	Meta-Protein 1464	Metagenome unknown	root	1	2	contig139614000012_19	ITNVQEILPLLEQVVQSGAK		MP_MPAv1_NewWF_BGP_1_A.csv
	MP_MPAv1_NewWF_BGP_1_A.csv	1027	Meta-Protein 1465	Metagenome unknown	root	1	1	contig138552000059_20	VLNIENVIGEVIESEDKVLIPVTR		MP_MPAv1_NewWF_BGP_1_A.csv
	MP_MPAv1_NewWF_BGP_1_A.csv	1028	Meta-Protein 260	Metagenome unknown	root	1	1	contig2270000005_3, contig139450000036_18	NSTDLEDIFIAHISGMDVFAR		MP_MPAv1_NewWF_BGP_1_A.csv
	MP_MPAv1_NewWF_BGP_1_A.csv	1029	Meta-Protein 1466	Metagenome unknown	root	1	2	contig138641000001_2	VAVMEALAEALEAGGSPSDAIAAFK		MP_MPAv1_NewWF_BGP_1_A.csv
	MP_MPAv1_NewWF_BGP_1_A.csv	1030	Meta-Protein 1467	Metagenome unknown	root	1	1	contig139472000027_11	VTLYDGSYHPVDSSEMAFKMAAILAFR		MP_MPAv1_NewWF_BGP_1_A.csv
	MP_MPAv1_NewWF_BGP_1_A.csv	1031	Meta-Protein 1468	Metagenome unknown	root	1	1	contig139329000048_3	GTFTESEIQEFVDDFVLK		MP_MPAv1_NewWF_BGP_1_A.csv
	MP_MPAv1_NewWF_BGP_1_A.csv	1032	Meta-Protein 1469	Metagenome unknown	root	1	1	contig39000030_31	VFNDTIYEVAGIVMNEALK		MP_MPAv1_NewWF_BGP_1_A.csv
	MP_MPAv1_NewWF_BGP_1_A.csv	1033	Meta-Protein 1470	Metagenome unknown	root	1	1	ATB_S_contig063542	GLNTAVGDEGGFAPNLQSNEEAIQAIMQAIER		MP_MPAv1_NewWF_BGP_1_A.csv
	MP_MPAv1_NewWF_BGP_1_A.csv	1034	Meta-Protein 1471	Metagenome unknown	root	1	2	contig2507000023_3	VSPSPVLVESLIEAYTPMGITAENVAER		MP_MPAv1_NewWF_BGP_1_A.csv
	MP_MPAv1_NewWF_BGP_1_A.csv	1035	Meta-Protein 1472	Metagenome unknown	root	1	1	contig5725000035_4	AIKESLGEINIIAEDLGYMTDEVIEMR		MP_MPAv1_NewWF_BGP_1_A.csv
	MP_MPAv1_NewWF_BGP_1_A.csv	1036	Meta-Protein 1473	Metagenome unknown	root	1	1	contig139231000016_2	SGAIDVLIVDSVAALVPR		MP_MPAv1_NewWF_BGP_1_A.csv
	MP_MPAv1_NewWF_BGP_1_A.csv	1037	Meta-Protein 1474	Metagenome unknown	root	1	2	contig39891000017_3	DLDGLLDALEAMQK		MP_MPAv1_NewWF_BGP_1_A.csv
	MP_MPAv1_NewWF_BGP_1_A.csv	1038	Meta-Protein 261	Metagenome unknown	root	2	2	ATB_S_contig048281, contig636000006_2	FIVESNYSGQLEELIASRGNDALPLGALAAGVK		MP_MPAv1_NewWF_BGP_1_A.csv
	MP_MPAv1_NewWF_BGP_1_A.csv	1039	Meta-Protein 1475	Metagenome unknown	root	1	2	contig1004000014_13	NNFTDVAINVLEMLK		MP_MPAv1_NewWF_BGP_1_A.csv
	MP_MPAv1_NewWF_BGP_1_A.csv	1040	Meta-Protein 1476	Metagenome unknown	root	1	1	contig49480000070_3	DLLSIFNDSLNATLTR		MP_MPAv1_NewWF_BGP_1_A.csv
	MP_MPAv1_NewWF_BGP_1_A.csv	1041	Meta-Protein 262	Metagenome unknown	root	1	9	contig5925000073_15, contig138967000047_2	LLDDYADLAYALTLVDVR		MP_MPAv1_NewWF_BGP_1_A.csv
	MP_MPAv1_NewWF_BGP_1_A.csv	1042	Meta-Protein 1477	Metagenome unknown	root	1	2	contig139302000007_13	DDTNNSILFNITEMVSLPK		MP_MPAv1_NewWF_BGP_1_A.csv
	MP_MPAv1_NewWF_BGP_1_A.csv	1043	Meta-Protein 1478	Metagenome unknown	root	1	3	ATB_S_contig010913	IADAFNLVVLEEGFAQAMVEK		MP_MPAv1_NewWF_BGP_1_A.csv
	MP_MPAv1_NewWF_BGP_1_A.csv	1044	Meta-Protein 1479	Metagenome unknown	root	1	1	contig2065000065_5	DVLSTIQQLEIVLNK		MP_MPAv1_NewWF_BGP_1_A.csv
	MP_MPAv1_NewWF_BGP_1_A.csv	1045	Meta-Protein 263	Metagenome unknown	root	1	1	contig139222000015_2, contig3546000039_2	VALISGGGSGHEPSHGGFVGK		MP_MPAv1_NewWF_BGP_1_A.csv
	MP_MPAv1_NewWF_BGP_1_A.csv	1046	Meta-Protein 264	Metagenome unknown	root	2	4	contig139531000044_3, contig9123000018_2, contig7111000012_1	AFIFVDEIVLDHTAEHYLQSYVTAR		MP_MPAv1_NewWF_BGP_1_A.csv
	MP_MPAv1_NewWF_BGP_1_A.csv	1047	Meta-Protein 265	Metagenome unknown	root	1	10	contig20943000017_5, contig1277000034_4	DIVGTIIVTAIEGGDVK		MP_MPAv1_NewWF_BGP_1_A.csv
	MP_MPAv1_NewWF_BGP_1_A.csv	1048	Meta-Protein 1480	Metagenome unknown	root	1	1	contig44522000058_8	TKEEILQAIENMTVLELSELVK		MP_MPAv1_NewWF_BGP_1_A.csv
	MP_MPAv1_NewWF_BGP_1_A.csv	1049	Meta-Protein 1481	Metagenome unknown	root	1	2	contig139660000044_2	DMQDTFFITEELLLR		MP_MPAv1_NewWF_BGP_1_A.csv
	MP_MPAv1_NewWF_BGP_1_A.csv	1050	Meta-Protein 1482	Metagenome unknown	root	1	2	contig5383000018_28	GIPLFEIPDDSIAAVEIESIVK		MP_MPAv1_NewWF_BGP_1_A.csv
	MP_MPAv1_NewWF_BGP_1_A.csv	1051	Meta-Protein 1483	Metagenome unknown	root	1	1	contig64870000054_2	DLNLLPVMASVQAFGAEAEQASR		MP_MPAv1_NewWF_BGP_1_A.csv
	MP_MPAv1_NewWF_BGP_1_A.csv	1052	Meta-Protein 1484	Metagenome unknown	root	1	1	contig2801000068_1	DINMEQIAGVYDDLFEIAK		MP_MPAv1_NewWF_BGP_1_A.csv
	MP_MPAv1_NewWF_BGP_1_A.csv	1053	Meta-Protein 1485	Metagenome unknown	root	1	1	contig139021000057_5	NSLEDEVSASLLSIVFEK		MP_MPAv1_NewWF_BGP_1_A.csv
	MP_MPAv1_NewWF_BGP_1_A.csv	1054	Meta-Protein 1486	Metagenome unknown	root	1	1	contig32391000051_16	YLFVDFKDILATVEEE		MP_MPAv1_NewWF_BGP_1_A.csv
	MP_MPAv1_NewWF_BGP_1_A.csv	1055	Meta-Protein 1487	Metagenome unknown	root	1	2	contig2010000006_2	DMLIDILDDPLTIAR		MP_MPAv1_NewWF_BGP_1_A.csv
	MP_MPAv1_NewWF_BGP_1_A.csv	1056	Meta-Protein 1488	Metagenome unknown	root	1	5	contig139549000078_2	EALEQAGGDLLDALILLEK		MP_MPAv1_NewWF_BGP_1_A.csv
	MP_MPAv1_NewWF_BGP_1_A.csv	1057	Meta-Protein 1489	Metagenome unknown	root	1	2	contig139218000074_6	DAIAALAVIIDEVR		MP_MPAv1_NewWF_BGP_1_A.csv
	MP_MPAv1_NewWF_BGP_1_A.csv	1058	Meta-Protein 1490	Metagenome unknown	root	1	4	contig1114000039_3	LVIEDIVLEYFDVAK		MP_MPAv1_NewWF_BGP_1_A.csv
	MP_MPAv1_NewWF_BGP_1_A.csv	1059	Meta-Protein 266	ZEAU_MAIZE 22 kDa alpha-zein 4 OS=Zea mays GN=AZS22-4 PE=1 SV=1	Zea mays	2	7	O48966, Q94IM1, P04698	FSLMNPVLSRQQPIVGGAIF		MP_MPAv1_NewWF_BGP_1_A.csv
	MP_MPAv1_NewWF_BGP_1_A.csv	1060	Meta-Protein 1491	Metagenome unknown	root	1	1	contig139469000030_14	DIDKDFLMPIEDIFSITGR		MP_MPAv1_NewWF_BGP_1_A.csv
	MP_MPAv1_NewWF_BGP_1_A.csv	1061	Meta-Protein 267	Metagenome unknown	root	1	8	contig37885000046_1, contig13530000075_2	YDLGISEEIEGFVATAFK		MP_MPAv1_NewWF_BGP_1_A.csv
	MP_MPAv1_NewWF_BGP_1_A.csv	1062	Meta-Protein 1492	Metagenome unknown	root	1	1	contig35974000023_4	WATVMEDVVNTITELGPSPLK		MP_MPAv1_NewWF_BGP_1_A.csv
	MP_MPAv1_NewWF_BGP_1_A.csv	1063	Meta-Protein 1493	Metagenome unknown	root	1	1	contig7414000027_1	IITPYENILIVMHEGASGGGKSEMIEQIHR		MP_MPAv1_NewWF_BGP_1_A.csv
	MP_MPAv1_NewWF_BGP_1_A.csv	1064	Meta-Protein 268	Metagenome unknown	root	1	2	contig9055000014_1, ATB_S_contig161851	QLLADYQTLIANLR		MP_MPAv1_NewWF_BGP_1_A.csv
	MP_MPAv1_NewWF_BGP_1_A.csv	1065	Meta-Protein 269	Metagenome unknown	root	1	2	contig10491000002_2, contig809000026_22	AEAALVVFNTLFSE		MP_MPAv1_NewWF_BGP_1_A.csv
	MP_MPAv1_NewWF_BGP_1_A.csv	1066	Meta-Protein 1494	Metagenome unknown	root	1	1	contig139233000057_7	DLDDYLQLLIAMK		MP_MPAv1_NewWF_BGP_1_A.csv
	MP_MPAv1_NewWF_BGP_1_A.csv	1067	Meta-Protein 1495	Metagenome unknown	root	1	10	contig139075000060_13	SYLDAAVAEVNAVLNQ		MP_MPAv1_NewWF_BGP_1_A.csv
	MP_MPAv1_NewWF_BGP_1_A.csv	1068	Meta-Protein 1496	Metagenome unknown	root	1	1	contig221000063_11	GIPAEIMAVLEDAFR		MP_MPAv1_NewWF_BGP_1_A.csv
	MP_MPAv1_NewWF_BGP_1_A.csv	1069	Meta-Protein 1497	Metagenome unknown	root	1	1	contig71000032_4	MKVGIIGAGTMGAGIAQAFAMTDGFDVCLCDIK		MP_MPAv1_NewWF_BGP_1_A.csv
	MP_MPAv1_NewWF_BGP_1_A.csv	1070	Meta-Protein 1498	Metagenome unknown	root	1	1	contig139634000044_5	EAGATAAQEVAFTLADGIAYVDAAIK		MP_MPAv1_NewWF_BGP_1_A.csv
	MP_MPAv1_NewWF_BGP_1_A.csv	1071	Meta-Protein 1499	Metagenome unknown	root	1	1	contig23450000051_2	VGLDSGIPTVFGIITSDTLEQAIER		MP_MPAv1_NewWF_BGP_1_A.csv
	MP_MPAv1_NewWF_BGP_1_A.csv	1072	Meta-Protein 270	Metagenome unknown	root	1	3	contig138980000003_16, Q46BQ2	LAELELGEIVMTDIVEGLPQGK		MP_MPAv1_NewWF_BGP_1_A.csv
	MP_MPAv1_NewWF_BGP_1_A.csv	1073	Meta-Protein 1500	Metagenome unknown	root	1	1	contig13084000019_54	VWTLASLFADACESDIGGSLYQGISDSQIRLYVHR		MP_MPAv1_NewWF_BGP_1_A.csv
	MP_MPAv1_NewWF_BGP_1_A.csv	1074	Meta-Protein 271	Metagenome unknown	root	5	28	contig139468000030_10, contig629000071_3, contig943000050_8, contig115000052_94	DIPFPMLSDQNGNIGR, FIIDPDGIVQAFEVMTPPVGR, FLIDPDGIVQAFEVMTPPVGR, MLDGKDIPFPMLSDQNGNIGRTLKPGPELVGNVWK		MP_MPAv1_NewWF_BGP_1_A.csv
	MP_MPAv1_NewWF_BGP_1_A.csv	1075	Meta-Protein 272	Metagenome unknown	root	1	2	contig12939000026_1, contig764000012_1	DGWLGDVAVVAWLEEETVK		MP_MPAv1_NewWF_BGP_1_A.csv
	MP_MPAv1_NewWF_BGP_1_A.csv	1076	Meta-Protein 1501	Metagenome unknown	root	1	1	contig202000038_5	HSFDLEEEAKLIENAVVTVLEEGYR		MP_MPAv1_NewWF_BGP_1_A.csv
	MP_MPAv1_NewWF_BGP_1_A.csv	1077	Meta-Protein 1502	Metagenome unknown	root	1	1	contig11636000059_6	DAEAAVNAFIGCVEETLVK		MP_MPAv1_NewWF_BGP_1_A.csv
	MP_MPAv1_NewWF_BGP_1_A.csv	1078	Meta-Protein 273	Metagenome unknown	root	3	6	contig18255000062_4, contig95128000037_2, contig56797000041_1, contig139069000017_38	ALSGDDPMAAIGDLVAAYWAR, LGDNADKLTGFAMHSATVAKTIISDVIVPEVFNPYVIER		MP_MPAv1_NewWF_BGP_1_A.csv
	MP_MPAv1_NewWF_BGP_1_A.csv	1079	Meta-Protein 1503	Metagenome unknown	root	1	1	contig2324000051_5	VIVDEVIAALQQEGVELLR		MP_MPAv1_NewWF_BGP_1_A.csv
	MP_MPAv1_NewWF_BGP_1_A.csv	1080	Meta-Protein 1504	Metagenome unknown	root	1	1	contig45000006_36	QAILSAAEAAEMILR		MP_MPAv1_NewWF_BGP_1_A.csv
	MP_MPAv1_NewWF_BGP_1_A.csv	1081	Meta-Protein 1505	Metagenome unknown	root	1	2	contig138720000051_2	CELVIAEVLEASR		MP_MPAv1_NewWF_BGP_1_A.csv
	MP_MPAv1_NewWF_BGP_1_A.csv	1082	Meta-Protein 1506	Metagenome unknown	root	1	1	contig24458000053_1	DMAFGLYDLVAPEINEVTQIGK		MP_MPAv1_NewWF_BGP_1_A.csv
	MP_MPAv1_NewWF_BGP_1_A.csv	1083	Meta-Protein 1507	Metagenome unknown	root	2	5	contig138368000066_2	MTEDLVEVLLNLQAPIRSLDELDQLFLEIIR		MP_MPAv1_NewWF_BGP_1_A.csv
	MP_MPAv1_NewWF_BGP_1_A.csv	1084	Meta-Protein 1508	Metagenome unknown	root	1	5	contig12333000037_30	VLEILEEITADINDLAK		MP_MPAv1_NewWF_BGP_1_A.csv
	MP_MPAv1_NewWF_BGP_1_A.csv	1085	Meta-Protein 1509	Metagenome unknown	root	1	1	contig56804000038_2	QVGLLGELLAAAEEDLELR		MP_MPAv1_NewWF_BGP_1_A.csv
	MP_MPAv1_NewWF_BGP_1_A.csv	1086	Meta-Protein 1510	Metagenome unknown	root	1	4	contig1093000005_65	EAGATAAQEIAFTLADGIAYVDAAIK		MP_MPAv1_NewWF_BGP_1_A.csv
	MP_MPAv1_NewWF_BGP_1_A.csv	1087	Meta-Protein 274	Metagenome unknown	root	1	3	contig138558000001_3, contig37280000052_3, contig139527000078_3	NYDPGDVALQLPILVVESINPVK		MP_MPAv1_NewWF_BGP_1_A.csv
	MP_MPAv1_NewWF_BGP_1_A.csv	1088	Meta-Protein 275	Metagenome unknown	root	2	8	ATB_S_contig019812, contig3240000078_1	MPSTSQPSPAEFVEVYERSAEEILTEVEGILDSLR		MP_MPAv1_NewWF_BGP_1_A.csv
	MP_MPAv1_NewWF_BGP_1_A.csv	1089	Meta-Protein 1511	Metagenome unknown	root	1	4	contig514000027_3	DLEALAVGLYEGIDEDFLR		MP_MPAv1_NewWF_BGP_1_A.csv
	MP_MPAv1_NewWF_BGP_1_A.csv	1090	Meta-Protein 1512	Metagenome unknown	root	1	2	contig138167000070_16	LTQENDVLLIFDEVITGFR		MP_MPAv1_NewWF_BGP_1_A.csv
	MP_MPAv1_NewWF_BGP_1_A.csv	1091	Meta-Protein 1513	Metagenome unknown	root	1	1	contig138465000024_22	ILVPGMNEAAFILQEGLATVEDIDK		MP_MPAv1_NewWF_BGP_1_A.csv
	MP_MPAv1_NewWF_BGP_1_A.csv	1092	Meta-Protein 276	Metagenome unknown	root	1	2	contig139124000045_15, contig139487000030_15	LRLEYLQEQVNWR		MP_MPAv1_NewWF_BGP_1_A.csv
	MP_MPAv1_NewWF_BGP_1_A.csv	1093	Meta-Protein 1514	Metagenome unknown	root	1	1	contig139234000061_7	MTSAYHAVHNLAEEK		MP_MPAv1_NewWF_BGP_1_A.csv
	MP_MPAv1_NewWF_BGP_1_A.csv	1094	Meta-Protein 1515	Metagenome unknown	root	1	1	contig139594000027_1	MHNIHWNVVGK		MP_MPAv1_NewWF_BGP_1_A.csv
	MP_MPAv1_NewWF_BGP_1_A.csv	1095	Meta-Protein 1516	ARGC_METMJ N-acetyl-gamma-glutamyl-phosphate reductase OS=Methanoculleus marisnigri (strain ATCC 35101 / DSM 1498 / JR1) GN=argC PE=3 SV=1	Methanoculleus marisnigri JR1	1	1	A3CRT6	KLDGTPVASVHPHLR		MP_MPAv1_NewWF_BGP_1_A.csv
	MP_MPAv1_NewWF_BGP_1_A.csv	1096	Meta-Protein 1517	Metagenome unknown	root	1	1	contig3573000046_2	LLTGHDRPISGHVLEK		MP_MPAv1_NewWF_BGP_1_A.csv
	MP_MPAv1_NewWF_BGP_1_A.csv	1097	Meta-Protein 1518	Metagenome unknown	root	1	1	contig14396000074_7	AHASFIKDLAK		MP_MPAv1_NewWF_BGP_1_A.csv
	MP_MPAv1_NewWF_BGP_1_A.csv	1098	Meta-Protein 1519	Metagenome unknown	root	1	1	contig11703000042_14	SSWAPFYNLHK		MP_MPAv1_NewWF_BGP_1_A.csv
	MP_MPAv1_NewWF_BGP_1_A.csv	1099	Meta-Protein 277	Metagenome unknown	root	2	2	contig7889000068_2, contig10424000058_4	GLMTTVHAYTNDQNIHDNSHKGLMTTVHAYTNDQNIHDNSHKK		MP_MPAv1_NewWF_BGP_1_A.csv
	MP_MPAv1_NewWF_BGP_1_A.csv	1100	Meta-Protein 278	Metagenome unknown	root	1	1	contig2135000033_27, contig138755000019_6	KNIPVGIAHIR		MP_MPAv1_NewWF_BGP_1_A.csv
	MP_MPAv1_NewWF_BGP_1_A.csv	1101	Meta-Protein 1520	Metagenome unknown	root	1	1	contig13859000009_5	THALHIGGSNTIDGVK		MP_MPAv1_NewWF_BGP_1_A.csv
	MP_MPAv1_NewWF_BGP_1_A.csv	1102	Meta-Protein 1521	Metagenome unknown	root	2	2	contig248000004_8	ELHRHPEVSMQEFRRHGDTAVIGILK		MP_MPAv1_NewWF_BGP_1_A.csv
	MP_MPAv1_NewWF_BGP_1_A.csv	1103	Meta-Protein 279	Metagenome unknown	root	2	1	contig4420000030_12, contig139539000036_6	AHAHRADDIMTAIRAHAHRADDIMTALR		MP_MPAv1_NewWF_BGP_1_A.csv
	MP_MPAv1_NewWF_BGP_1_A.csv	1104	Meta-Protein 1522	Metagenome unknown	root	1	1	contig32928000014_4	HITTLVPIKR		MP_MPAv1_NewWF_BGP_1_A.csv
	MP_MPAv1_NewWF_BGP_1_A.csv	1105	Meta-Protein 280	ILVC_STRZP Ketol-acid reductoisomerase (NADP(+)) OS=Streptococcus pneumoniae (strain P1031) GN=ilvC PE=3 SV=1	Bacteria	2	2	C1CIU7, A4VXL3, Q2NAU8	IAVIGYGSQGHAHAQNLRIAVLGYGSQGHAHAQNLR		MP_MPAv1_NewWF_BGP_1_A.csv
	MP_MPAv1_NewWF_BGP_1_A.csv	1106	Meta-Protein 1523	PER39_ARATH Peroxidase 39 OS=Arabidopsis thaliana GN=PER39 PE=1 SV=1	Arabidopsis thaliana	1	1	Q9SUT2	MHFHDCFVR		MP_MPAv1_NewWF_BGP_1_A.csv
	MP_MPAv1_NewWF_BGP_1_A.csv	1107	Meta-Protein 281	Metagenome unknown	root	2	7	contig1419000000_1, contig58345000021_1, contig22595000066_2, contig12052000049_1, contig1751000078_3, contig6219000003_1, contig91733000031_1, contig107000005_3, contig6266000045_1	MIINHNLNAMNAHRNAQDGISLIQTAEGALQETHAILQR		MP_MPAv1_NewWF_BGP_1_A.csv
	MP_MPAv1_NewWF_BGP_1_A.csv	1108	Meta-Protein 282	Metagenome unknown	root	3	6	contig13685000043_3, contig1653000040_7, contig5358000061_7, contig139619000068_17, contig138924000076_5, contig3782000065_4	EAGLEIVELGGVQPNPR, VFGVDQDFYNPERVLLHYGGGHIVR		MP_MPAv1_NewWF_BGP_1_A.csv
	MP_MPAv1_NewWF_BGP_1_A.csv	1109	Meta-Protein 1524	Metagenome unknown	root	1	1	contig138667000063_2	IGQGAKPGIGGHLPGEKVNEEVSK		MP_MPAv1_NewWF_BGP_1_A.csv
	MP_MPAv1_NewWF_BGP_1_A.csv	1110	Meta-Protein 283	Metagenome unknown	root	4	2	contig574000018_1, contig139548000067_13, contig1130000011_7, contig139726000014_9	IGDLIMLLVPDQVQK, LGDLIMILVPDQVQK, TVAIIGYGSQGHAHAQNLKTVAILGYGSQGHAHAQNLK		MP_MPAv1_NewWF_BGP_1_A.csv
	MP_MPAv1_NewWF_BGP_1_A.csv	1111	Meta-Protein 284	Metagenome unknown	root	48	188	contig139041000045_1, contig1068000023_28, contig11119000027_6, contig427000026_1, contig968000027_9, contig12701000078_3, contig139433000016_6, contig16000010_4, contig4485000053_2, contig139724000004_1, contig43243000047_1, P07962, contig139433000048_15, ATB_G5_contig021593, contig138952000045_2, contig23215000019_1, contig1649000055_9, contig22503000029_1, contig25337000062_1	ALWQAIHIPTTVVR, ARGPNEPGGLSFGHLSDIIQTSR, ASLEVVKDIATESTLYGIETYEK, ATLDVVKDIATESTIYGIETYEK, CHLGGIPLGQR, DIATESTIYGIETYEK, DIATESTIYGIETYEKFPTALEDHFGGSQR, DIATESTLYGIETYEK, DIATESTLYGIETYEKFPTALEDHFGGSQR, FAQEFGSNKQTGGDITSNTTK, FPTALEDHFGGSQR, FQGQDVQSDTAEYYKYNGVR, GAIREFMPAGER, GALREFMPAGER, GDAFTVNPLVK, GDAWCFDPR, GIAFYNPMMHSGAPLGQR, GIPMMNQDIGVPLGQR, GISMYDPERAHLGGIPMGQR, GLAFYNPMMHSGAPLGQR, GP…		MP_MPAv1_NewWF_BGP_1_A.csv
	MP_MPAv1_NewWF_BGP_1_A.csv	1112	Meta-Protein 1525	Metagenome unknown	root	1	1	contig14997000072_2	INEEGHAMHGDVLNRPFK		MP_MPAv1_NewWF_BGP_1_A.csv
	MP_MPAv1_NewWF_BGP_1_A.csv	1113	Meta-Protein 1526	Metagenome unknown	root	1	1	contig27903000031_1	RLVESVSRPLQVR		MP_MPAv1_NewWF_BGP_1_A.csv
	MP_MPAv1_NewWF_BGP_1_A.csv	1114	Meta-Protein 285	Metagenome unknown	root	3	3	contig59503000001_3, contig139491000056_3	EKVNVHGGAIALGHPVGATGTK, VNVHGGAIALGHPVGATGTKYSISREEQDQFALESHQK		MP_MPAv1_NewWF_BGP_1_A.csv
	MP_MPAv1_NewWF_BGP_1_A.csv	1115	Meta-Protein 286	Metagenome unknown	root	1	1	contig6939000027_1, contig5094000000_30	ITQNLLHDNQRPPYAK		MP_MPAv1_NewWF_BGP_1_A.csv
	MP_MPAv1_NewWF_BGP_1_A.csv	1116	Meta-Protein 1527	Metagenome unknown	root	1	1	contig1099000031_2	IHPARIEEMVEK		MP_MPAv1_NewWF_BGP_1_A.csv
	MP_MPAv1_NewWF_BGP_1_A.csv	1117	Meta-Protein 287	Metagenome unknown	root	2	3	contig59000078_15, contig5373000014_14	GITINTSHVEYETEKRKTVVTGVEMFRK		MP_MPAv1_NewWF_BGP_1_A.csv
	MP_MPAv1_NewWF_BGP_1_A.csv	1118	Meta-Protein 1528	Metagenome unknown	root	1	1	contig913000047_6	LSQNLLHDNQRPPYAK		MP_MPAv1_NewWF_BGP_1_A.csv
	MP_MPAv1_NewWF_BGP_1_A.csv	1119	Meta-Protein 288	Metagenome unknown	root	4	9	contig57162000058_1, contig614000062_2	AGLPSIDSYSLQALQNER, DFQLDNMQDIILIR, DQVIDWLEEVINKRHELAFEGLR		MP_MPAv1_NewWF_BGP_1_A.csv
	MP_MPAv1_NewWF_BGP_1_A.csv	1120	Meta-Protein 1529	Metagenome unknown	root	1	1	contig139682000014_60	IKNVISNELGKPVR		MP_MPAv1_NewWF_BGP_1_A.csv
	MP_MPAv1_NewWF_BGP_1_A.csv	1121	Meta-Protein 289	Metagenome unknown	root	1	1	contig139514000027_3, contig12333000037_53	TTHEALGIPTKEANAQGIR		MP_MPAv1_NewWF_BGP_1_A.csv
	MP_MPAv1_NewWF_BGP_1_A.csv	1122	Meta-Protein 290	Metagenome unknown	Methanoculleus marisnigri JR1	1	2	contig139501000068_18, A3CTG3	AAEKPHMNLAVIGHIDHGK		MP_MPAv1_NewWF_BGP_1_A.csv
	MP_MPAv1_NewWF_BGP_1_A.csv	1123	Meta-Protein 1530	Metagenome unknown	root	1	1	contig26910000023_1	INDKHFEVIVR		MP_MPAv1_NewWF_BGP_1_A.csv
	MP_MPAv1_NewWF_BGP_1_A.csv	1124	Meta-Protein 1531	PUR8_STRMU Adenylosuccinate lyase OS=Streptococcus mutans serotype c (strain ATCC 700610 / UA159) GN=purB PE=3 SV=2	Streptococcus mutans UA159	1	1	P72478	NIERFEHAAAGVEAGK		MP_MPAv1_NewWF_BGP_1_A.csv
	MP_MPAv1_NewWF_BGP_1_A.csv	1125	Meta-Protein 291	Metagenome unknown	root	1	1	contig1764000048_5, ATB_B_contig043193	KLFVFEHESR		MP_MPAv1_NewWF_BGP_1_A.csv
	MP_MPAv1_NewWF_BGP_1_A.csv	1126	Meta-Protein 292	Metagenome unknown	root	2	1	contig5761000067_9, Q97EI4, contig60299000057_6	INIHTAKPGMVIGKLNIHTAKPGMVIGK		MP_MPAv1_NewWF_BGP_1_A.csv
	MP_MPAv1_NewWF_BGP_1_A.csv	1127	Meta-Protein 1532	DIA_DROME Protein diaphanous OS=Drosophila melanogaster GN=dia PE=2 SV=2	Drosophila melanogaster	1	1	P48608	FLEIIEDMNIPKDK		MP_MPAv1_NewWF_BGP_1_A.csv
	MP_MPAv1_NewWF_BGP_1_A.csv	1128	Meta-Protein 293	Metagenome unknown	root	2	4	contig11453000066_2, contig8548000012_9	KGDILVINTGYHKYAWDQPEADEVR		MP_MPAv1_NewWF_BGP_1_A.csv
	MP_MPAv1_NewWF_BGP_1_A.csv	1129	Meta-Protein 1533	Metagenome unknown	root	1	1	contig19404000067_2	EHILLSHQVGVPR		MP_MPAv1_NewWF_BGP_1_A.csv
	MP_MPAv1_NewWF_BGP_1_A.csv	1130	Meta-Protein 1534	Metagenome unknown	root	1	1	contig114240000037_5	ALSGYWTDTHSEEVKR		MP_MPAv1_NewWF_BGP_1_A.csv
	MP_MPAv1_NewWF_BGP_1_A.csv	1131	Meta-Protein 1535	Metagenome unknown	root	1	1	contig1970000002_1	GAMREFIPAGER		MP_MPAv1_NewWF_BGP_1_A.csv
	MP_MPAv1_NewWF_BGP_1_A.csv	1132	Meta-Protein 294	Metagenome unknown	root	1	1	contig6379000041_2, contig52950000076_1	HTLPTASEVQKLER		MP_MPAv1_NewWF_BGP_1_A.csv
	MP_MPAv1_NewWF_BGP_1_A.csv	1133	Meta-Protein 295	Metagenome unknown	root	1	1	contig5007000003_5, ATB_G5_contig042533	LWVSGHTHEPVLQR		MP_MPAv1_NewWF_BGP_1_A.csv
	MP_MPAv1_NewWF_BGP_1_A.csv	1134	Meta-Protein 296	Metagenome unknown	root	1	2	contig139382000010_28, contig292000031_15, contig493000052_61	QLLEAGVHFGHQTR		MP_MPAv1_NewWF_BGP_1_A.csv
	MP_MPAv1_NewWF_BGP_1_A.csv	1135	Meta-Protein 1536	SYR_SYNS9 Arginine--tRNA ligase OS=Synechococcus sp. (strain CC9902) GN=argS PE=3 SV=1	Synechococcus sp. CC9902	1	1	Q3AVY5	FDRVIVEVEDELLPNR		MP_MPAv1_NewWF_BGP_1_A.csv
	MP_MPAv1_NewWF_BGP_1_A.csv	1136	Meta-Protein 1537	Metagenome unknown	root	1	1	ATB_G30_contig029483	EVMVEIESIARK		MP_MPAv1_NewWF_BGP_1_A.csv
	MP_MPAv1_NewWF_BGP_1_A.csv	1137	Meta-Protein 297	EFG_CLOB8 Elongation factor G OS=Clostridium beijerinckii (strain ATCC 51743 / NCIMB 8052) GN=fusA PE=3 SV=1	root	2	5	A6LPQ8, contig15604000039_2, contig548000060_4, contig27023000053_4	LVHGSYHEVDSSEMAFKSEVETLEAGELGAIIGLK		MP_MPAv1_NewWF_BGP_1_A.csv
	MP_MPAv1_NewWF_BGP_1_A.csv	1138	Meta-Protein 1538	Metagenome unknown	root	1	1	contig139302000048_2	TALLEAEHTAFNSRK		MP_MPAv1_NewWF_BGP_1_A.csv
	MP_MPAv1_NewWF_BGP_1_A.csv	1139	Meta-Protein 298	Metagenome unknown	root	1	1	contig139154000010_11, contig2119000077_18	HELSGTLHGLMR		MP_MPAv1_NewWF_BGP_1_A.csv
	MP_MPAv1_NewWF_BGP_1_A.csv	1140	Meta-Protein 299	Metagenome unknown	root	12	35	contig138746000011_8, contig139522000016_149, Q9ZN99, ATB_B_contig072823, contig52489000016_1, contig1996000064_3, contig134000036_79, contig569000032_6	ALGIDISTVDLNLPER, AMTPDQQQVLFENTAR, GPLMLQDIWFLEK, GSGAFGTFTVTHDITNYTK, GSQLNYEPNSYGNWKDQPQYALPVEK, LAHFDREVIPER, LGVNHHQIPVNSPQGVK, MKGDNYKNPMDKNELGEPLPSR, MYIQVMTEEQANSMK, RGPLMLQDIWFLEK, RGPMLLQDIWFIEKYDFREDDNDYYTQPGELFR		MP_MPAv1_NewWF_BGP_1_A.csv
	MP_MPAv1_NewWF_BGP_1_A.csv	1141	Meta-Protein 1539	Metagenome unknown	root	1	1	contig6571000017_1	AGLEEVIHHGQPATGVK		MP_MPAv1_NewWF_BGP_1_A.csv
	MP_MPAv1_NewWF_BGP_1_A.csv	1142	Meta-Protein 300	Metagenome unknown	root	1	1	contig10249000052_31, contig98097000020_20	AAEPYKGVVIHGVSESTPPSK		MP_MPAv1_NewWF_BGP_1_A.csv
	MP_MPAv1_NewWF_BGP_1_A.csv	1143	Meta-Protein 301	CISY_BRADU Citrate synthase OS=Bradyrhizobium diazoefficiens (strain JCM 10833 / IAM 13628 / NBRC 14792 / USDA 110) GN=gltA PE=3 SV=2	Alphaproteobacteria	1	1	P94325, P51042	IFILHADHEQNASTSTVR		MP_MPAv1_NewWF_BGP_1_A.csv
	MP_MPAv1_NewWF_BGP_1_A.csv	1144	Meta-Protein 1540	Metagenome unknown	root	1	1	contig139628000068_73	SHIATLKDLEDAK		MP_MPAv1_NewWF_BGP_1_A.csv
	MP_MPAv1_NewWF_BGP_1_A.csv	1145	Meta-Protein 302	Metagenome unknown	root	2	2	contig139678000053_15, contig3920000057_42, contig139130000057_6, contig102000007_20, contig3000031_15, contig3505000049_12, contig1252000050_4, contig6827000060_8, contig103000026_39, contig291000019_17, contig1008000056_7, contig139442000021_8	GIMTTVHSYTNDQRGLMTTVHSYTNDQR		MP_MPAv1_NewWF_BGP_1_A.csv
	MP_MPAv1_NewWF_BGP_1_A.csv	1146	Meta-Protein 1541	Metagenome unknown	root	1	1	contig139738000012_5	MDNIKIEGAFSHQAK		MP_MPAv1_NewWF_BGP_1_A.csv
	MP_MPAv1_NewWF_BGP_1_A.csv	1147	Meta-Protein 303	Metagenome unknown	root	1	1	contig28792000077_1, ATB_B_contig006652	NKYTYFASVAR		MP_MPAv1_NewWF_BGP_1_A.csv
	MP_MPAv1_NewWF_BGP_1_A.csv	1148	Meta-Protein 1542	Metagenome unknown	root	1	1	contig185000033_23	GITINTSHVEYETNNR		MP_MPAv1_NewWF_BGP_1_A.csv
	MP_MPAv1_NewWF_BGP_1_A.csv	1149	Meta-Protein 304	Metagenome unknown	root	1	2	contig1172000060_1, contig15915000079_1, contig300000078_11	FHTQTGGSTLTAQQPDNNIVR		MP_MPAv1_NewWF_BGP_1_A.csv
	MP_MPAv1_NewWF_BGP_1_A.csv	1150	Meta-Protein 305	Metagenome unknown	root	1	1	contig10673000059_4, contig14469000062_1	RVNLPAQTLVK		MP_MPAv1_NewWF_BGP_1_A.csv
	MP_MPAv1_NewWF_BGP_1_A.csv	1151	Meta-Protein 306	Metagenome unknown	root	2	4	contig18405000025_3, contig2027000050_1	GWEKPITIARHAYGDIYKDVEMK		MP_MPAv1_NewWF_BGP_1_A.csv
	MP_MPAv1_NewWF_BGP_1_A.csv	1152	Meta-Protein 307	Metagenome unknown	root	1	3	contig10447000065_2, contig3024000033_3, contig139272000069_21, contig10564000044_2, contig1790000008_7	KPLLYAATADNYEK		MP_MPAv1_NewWF_BGP_1_A.csv
	MP_MPAv1_NewWF_BGP_1_A.csv	1153	Meta-Protein 1543	TPIS_CLOBA Triosephosphate isomerase OS=Clostridium botulinum (strain Alaska E43 / Type E3) GN=tpiA PE=3 SV=1	Clostridium botulinum E3 str. Alaska E43	1	1	B2UY22	VVEELKPLVK		MP_MPAv1_NewWF_BGP_1_A.csv
	MP_MPAv1_NewWF_BGP_1_A.csv	1154	Meta-Protein 1544	Metagenome unknown	root	1	1	contig139325000069_3	VSYPIYHIK		MP_MPAv1_NewWF_BGP_1_A.csv
	MP_MPAv1_NewWF_BGP_1_A.csv	1155	Meta-Protein 308	Metagenome unknown	Proteobacteria	1	2	contig1286000011_12, Q1D778, Q17VN8, contig7684000063_4	RVGGATYQVPVEVR		MP_MPAv1_NewWF_BGP_1_A.csv
	MP_MPAv1_NewWF_BGP_1_A.csv	1156	Meta-Protein 309	Metagenome unknown	root	1	1	contig575000038_1, contig21413000021_1	SKYGSAFDGTDACGGVNYGSTR		MP_MPAv1_NewWF_BGP_1_A.csv
	MP_MPAv1_NewWF_BGP_1_A.csv	1157	Meta-Protein 310	Metagenome unknown	Clostridium beijerinckii NCIMB 8052	1	2	contig138324000064_2, A6LPU6	KPEFAFEEAVRR		MP_MPAv1_NewWF_BGP_1_A.csv
	MP_MPAv1_NewWF_BGP_1_A.csv	1158	Meta-Protein 1545	Metagenome unknown	root	1	1	contig139483000012_5	TPHFYVFDKER		MP_MPAv1_NewWF_BGP_1_A.csv
	MP_MPAv1_NewWF_BGP_1_A.csv	1159	Meta-Protein 1546	Metagenome unknown	root	1	1	contig582000051_1	NAEKMILENQVK		MP_MPAv1_NewWF_BGP_1_A.csv
	MP_MPAv1_NewWF_BGP_1_A.csv	1160	Meta-Protein 311	MTBC_METBA Dimethylamine corrinoid protein OS=Methanosarcina barkeri GN=mtbC PE=1 SV=3	root	4	9	O93657, contig139495000016_45, contig139535000067_28, contig1456000016_1	AKEVMEPSEIIEK, AKGELEPSEIIEK, GLAAGMNEVGILFERSIVSTMLQSAGFEVYDIGR		MP_MPAv1_NewWF_BGP_1_A.csv
	MP_MPAv1_NewWF_BGP_1_A.csv	1161	Meta-Protein 312	Metagenome unknown	root	2	4	contig205000047_1, contig21050000029_3, contig2507000034_1	TTGFVSSTVGGGLARYRPADVAPSSTTASIYK		MP_MPAv1_NewWF_BGP_1_A.csv
	MP_MPAv1_NewWF_BGP_1_A.csv	1162	Meta-Protein 313	RS2_STACT 30S ribosomal protein S2 OS=Staphylococcus carnosus (strain TM300) GN=rpsB PE=3 SV=1	root	2	2	B9DPG8, A6U174, contig3327000062_7	KVDEAYNFIKKVDEAYNFLK		MP_MPAv1_NewWF_BGP_1_A.csv
	MP_MPAv1_NewWF_BGP_1_A.csv	1163	Meta-Protein 314	Metagenome unknown	root	1	1	contig1183000076_2, contig1579000045_3	AVGESVEKPLAYYK		MP_MPAv1_NewWF_BGP_1_A.csv
	MP_MPAv1_NewWF_BGP_1_A.csv	1164	Meta-Protein 1547	Metagenome unknown	root	1	1	contig139480000029_3	AEAFAAFKEGVK		MP_MPAv1_NewWF_BGP_1_A.csv
	MP_MPAv1_NewWF_BGP_1_A.csv	1165	Meta-Protein 315	Metagenome unknown	root	4	18	contig2231000036_6, contig2189000000_4, contig781000078_6, contig694000027_6, contig67647000021_2, ATB_B_contig045483, contig56000027_17, contig10583000038_15	KFQVGFEEGVK, SNIVGFVGGMEVPLIR, VGLIFAEGGLGDQSFNDAAYRWANPDAQVLVNYAGAFDDPGR		MP_MPAv1_NewWF_BGP_1_A.csv
	MP_MPAv1_NewWF_BGP_1_A.csv	1166	Meta-Protein 316	Metagenome unknown	root	2	2	contig4329000049_1, contig18000075_103, contig139059000039_54	PIVTSTEMFKKPLVTSTEMFKK		MP_MPAv1_NewWF_BGP_1_A.csv
	MP_MPAv1_NewWF_BGP_1_A.csv	1167	Meta-Protein 317	Metagenome unknown	root	1	2	contig3482000029_20, contig22069000052_1, contig120177000037_3, contig139083000017_105, contig45000037_9, contig26513000066_2	LYTIYSPPEHR		MP_MPAv1_NewWF_BGP_1_A.csv
	MP_MPAv1_NewWF_BGP_1_A.csv	1168	Meta-Protein 318	Metagenome unknown	root	6	18	contig1371000028_4, contig138944000072_3, contig139494000053_5	AGEIVVETYEGFR, AIEDFGIEVR, GVLGDDFPMEILDK, GVLGDDFPMEILDKVAELTEK, RVDQAAYLMVQKVKAGEIVVETYEGFR		MP_MPAv1_NewWF_BGP_1_A.csv
	MP_MPAv1_NewWF_BGP_1_A.csv	1169	Meta-Protein 319	Metagenome unknown	root	9	15	contig32_12, contig6879000057_2, contig139569000075_10, contig907000020_28, contig139237000074_8, contig7543000018_19	ANLILNPDELKMGDAIPVQAQK, DTAFFSTNCAMQTPLIK, GLIINQAVPGTNAAVDK, LIMMDFLTYGEEHIIN, LIMMDFLTYGEEHILN, LSVTTSPYTEEGLEIPHFR, LTVSTSPYTEEGLEIPHFR, TIVHYSFPRTLVHYSFPR		MP_MPAv1_NewWF_BGP_1_A.csv
	MP_MPAv1_NewWF_BGP_1_A.csv	1170	Meta-Protein 320	Metagenome unknown	root	1	1	contig1814000050_1, contig5831000021_1	AIFAADKVTGGEVR		MP_MPAv1_NewWF_BGP_1_A.csv
	MP_MPAv1_NewWF_BGP_1_A.csv	1171	Meta-Protein 321	Metagenome unknown	root	6	14	contig121868000079_1, contig46000006_4, contig3570000033_4, ATB_G30_contig089383	DGFVTPQEALDAAQAELESR, FTVNTPENVETLQYMVDR, MREIFEAQNPNIK, QVVTIDFLNFSSSGDNEVHLEK, TGFDTSVSDPNALAAFRVNIQTIGYGDYFVR		MP_MPAv1_NewWF_BGP_1_A.csv
	MP_MPAv1_NewWF_BGP_1_A.csv	1172	Meta-Protein 1548	ISPE_THEP1 4-diphosphocytidyl-2-C-methyl-D-erythritol kinase OS=Thermotoga petrophila (strain RKU-1 / ATCC BAA-488 / DSM 13995) GN=ispE PE=3 SV=1	Thermotoga petrophila RKU-1	1	1	A5IMJ0	NTGEEFGLKVTLK		MP_MPAv1_NewWF_BGP_1_A.csv
	MP_MPAv1_NewWF_BGP_1_A.csv	1173	Meta-Protein 322	Metagenome unknown	root	2	1	contig579000053_11, contig16531000001_2	VAIIGYGSQGHAHALNLKVAILGYGSQGHAHALNLK		MP_MPAv1_NewWF_BGP_1_A.csv
	MP_MPAv1_NewWF_BGP_1_A.csv	1174	Meta-Protein 323	PUS10_IGNAA tRNA pseudouridine synthase Pus10 OS=Ignisphaera aggregans (strain DSM 17230 / JCM 13409 / AQ1.S1) GN=pus10 PE=3 SV=1	root	1	2	E0SNQ8, contig1673000019_4	RLEEFFR		MP_MPAv1_NewWF_BGP_1_A.csv
	MP_MPAv1_NewWF_BGP_1_A.csv	1175	Meta-Protein 1549	Metagenome unknown	root	1	1	contig3000034_35	MNIETVIASIR		MP_MPAv1_NewWF_BGP_1_A.csv
	MP_MPAv1_NewWF_BGP_1_A.csv	1176	Meta-Protein 324	Metagenome unknown	root	2	5	contig139825000041_1, contig139878000004_10, contig8282000043_2, contig39000071_17	GLEQASTNAQDGISLIQTAEGALNETQAILQRLEHTIANADNTAENLQAAESR		MP_MPAv1_NewWF_BGP_1_A.csv
	MP_MPAv1_NewWF_BGP_1_A.csv	1177	Meta-Protein 325	Metagenome unknown	root	1	1	contig7170000012_3, contig787000044_89, contig29892000061_7, contig4088000003_5	GLMTTVHAYTTDQR		MP_MPAv1_NewWF_BGP_1_A.csv
	MP_MPAv1_NewWF_BGP_1_A.csv	1178	Meta-Protein 326	Metagenome unknown	root	2	1	contig3781000061_8, contig139938000004_25, contig1637000050_27	HVPVYITEDMVGHKHVPVYLTEDMVGHK		MP_MPAv1_NewWF_BGP_1_A.csv
	MP_MPAv1_NewWF_BGP_1_A.csv	1179	Meta-Protein 327	Metagenome unknown	root	2	5	contig6229000068_1, contig1749000001_1, ATB_S_contig135582, contig7684000063_5	GQYGHVVLEVEPNERLGANPVAVQWPIGAEDTFR		MP_MPAv1_NewWF_BGP_1_A.csv
	MP_MPAv1_NewWF_BGP_1_A.csv	1180	Meta-Protein 328	Metagenome unknown	root	2	1	contig119075000051_2, contig139143000061_17, contig1461000016_2	IQHNASQIDNYLEQRLQHNASQIDNYLEQR		MP_MPAv1_NewWF_BGP_1_A.csv
	MP_MPAv1_NewWF_BGP_1_A.csv	1181	Meta-Protein 329	RL1_CLOP1 50S ribosomal protein L1 OS=Clostridium perfringens (strain ATCC 13124 / DSM 756 / JCM 1290 / NCIMB 6125 / NCTC 8237 / Type A) GN=rplA PE=3 SV=1	root	2	2	Q0TMN5, contig12841000049_4, contig470000012_21, contig138370000066_41	AKFDETIEIHVRAKFDETIELHVR		MP_MPAv1_NewWF_BGP_1_A.csv
	MP_MPAv1_NewWF_BGP_1_A.csv	1182	Meta-Protein 330	Metagenome unknown	root	3	6	contig5853000071_4, contig3522000041_1	NLRDAFAGESMAHMK, STHYALEAEKIHADMYGQAKYQIYANVAEKEGLPNVAK		MP_MPAv1_NewWF_BGP_1_A.csv
	MP_MPAv1_NewWF_BGP_1_A.csv	1183	Meta-Protein 331	Metagenome unknown	root	1	1	contig1303000048_28, contig139465000075_2	FVNEYAERDVLAK		MP_MPAv1_NewWF_BGP_1_A.csv
	MP_MPAv1_NewWF_BGP_1_A.csv	1184	Meta-Protein 332	Metagenome unknown	root	2	1	contig96000008_5, contig2882000048_3	KLEVTVPIRKLEVTVPLR		MP_MPAv1_NewWF_BGP_1_A.csv
	MP_MPAv1_NewWF_BGP_1_A.csv	1185	Meta-Protein 333	RS7_CLOPE 30S ribosomal protein S7 OS=Clostridium perfringens (strain 13 / Type A) GN=rpsG PE=3 SV=1	Clostridium perfringens	1	1	Q8XHS0, Q0SQE0	RIGGANYQVPIEVRPER		MP_MPAv1_NewWF_BGP_1_A.csv
	MP_MPAv1_NewWF_BGP_1_A.csv	1186	Meta-Protein 334	Metagenome unknown	root	5	6	contig138792000006_23, contig125991000063_3, contig297000063_9	KLLKPDPNIEIINIHGK, NMKEDVIEGFK, NMKEDVLEGFK, SINSEIPVIFLTAKVGADDYITKPFSMEELVFR		MP_MPAv1_NewWF_BGP_1_A.csv
	MP_MPAv1_NewWF_BGP_1_A.csv	1187	Meta-Protein 335	Metagenome unknown	root	2	6	contig139301000010_2, contig139868000029_14, contig3856000006_3, contig139616000068_1, ATB_G5_contig043832	IFIKDEAANASGSFKIQSQYGVGNTPIIELR		MP_MPAv1_NewWF_BGP_1_A.csv
	MP_MPAv1_NewWF_BGP_1_A.csv	1188	Meta-Protein 336	COFC_MYCLE 2-phospho-L-lactate guanylyltransferase OS=Mycobacterium leprae (strain TN) GN=cofC PE=3 SV=1	Mycobacterium leprae	1	2	O33128, B8ZS07	AGGTADVGLIIAVK		MP_MPAv1_NewWF_BGP_1_A.csv
	MP_MPAv1_NewWF_BGP_1_A.csv	1189	Meta-Protein 337	Metagenome unknown	root	2	1	contig26573000067_4, contig139012000072_4	IEVHPLGIGGKLEVHPLGIGGK		MP_MPAv1_NewWF_BGP_1_A.csv
	MP_MPAv1_NewWF_BGP_1_A.csv	1190	Meta-Protein 338	Metagenome unknown	root	2	1	contig99000010_10, contig92196000031_4, contig139178000058_7, contig139230000022_1, contig6207000003_1	NVAAGANPIFIKRNVAAGANPIFLKR		MP_MPAv1_NewWF_BGP_1_A.csv
	MP_MPAv1_NewWF_BGP_1_A.csv	1191	Meta-Protein 339	HMC1_METTE Chromosomal protein MC1 OS=Methanosarcina thermophila PE=1 SV=1	root	1	1	P12770, contig1068000023_12	NFVLRDEDGNEHGVFTGK		MP_MPAv1_NewWF_BGP_1_A.csv
	MP_MPAv1_NewWF_BGP_1_A.csv	1192	Meta-Protein 1550	Metagenome unknown	root	1	1	contig139827000054_2	NGSFSSTGSGNATAAEDGTVTLYHR		MP_MPAv1_NewWF_BGP_1_A.csv
	MP_MPAv1_NewWF_BGP_1_A.csv	1193	Meta-Protein 340	Metagenome unknown	root	1	3	contig18113000059_4, contig139321000010_20, contig1935000066_4, contig64481000017_2, contig844000058_12	AIAYAELVHAR		MP_MPAv1_NewWF_BGP_1_A.csv
	MP_MPAv1_NewWF_BGP_1_A.csv	1194	Meta-Protein 341	Metagenome unknown	root	4	9	contig2468000014_1, contig139319000056_8, contig138794000051_1, contig50337000026_1, contig139732000078_46, contig1630000000_3, contig138520000043_22	ALILEDQNFQK, IMPVKDVIEPR, NLTPDEVEVFETPTLTEGLKVAYVEMLQSQGLMHDTYVYGVDAK		MP_MPAv1_NewWF_BGP_1_A.csv
	MP_MPAv1_NewWF_BGP_1_A.csv	1195	Meta-Protein 1551	Metagenome unknown	root	1	1	contig53000052_73	VGARPDDLFYEGGIKK		MP_MPAv1_NewWF_BGP_1_A.csv
	MP_MPAv1_NewWF_BGP_1_A.csv	1196	Meta-Protein 342	Metagenome unknown	root	1	1	contig138779000055_2, contig40000027_9	YIQENNIPFGPAK		MP_MPAv1_NewWF_BGP_1_A.csv
	MP_MPAv1_NewWF_BGP_1_A.csv	1197	Meta-Protein 1552	Metagenome unknown	root	1	2	contig390000000_59	SAIRDDNPLVFVEHK		MP_MPAv1_NewWF_BGP_1_A.csv
	MP_MPAv1_NewWF_BGP_1_A.csv	1198	Meta-Protein 343	Metagenome unknown	root	1	2	contig139261000000_3, contig1203000005_8	ASVQYIIDGK		MP_MPAv1_NewWF_BGP_1_A.csv
	MP_MPAv1_NewWF_BGP_1_A.csv	1199	Meta-Protein 344	Metagenome unknown	root	3	5	ATB_S_contig027403, contig139429000077_33	ALEEEFMDELNAR, QLISQALAEEQVATAADLDVIYGALRYATRYEMVELTAR		MP_MPAv1_NewWF_BGP_1_A.csv
	MP_MPAv1_NewWF_BGP_1_A.csv	1200	Meta-Protein 345	Metagenome unknown	root	3	6	contig6763000006_4, contig575000028_1	AAIAMALASNPK, DAFAVVGLPLDFLSRSGPVQAVDGVSFQLQQGR		MP_MPAv1_NewWF_BGP_1_A.csv
	MP_MPAv1_NewWF_BGP_1_A.csv	1201	Meta-Protein 346	Metagenome unknown	root	1	4	contig18128000053_2, ATB_S_contig026631, ATB_B_contig018393	NSHPAYDTIANEWR		MP_MPAv1_NewWF_BGP_1_A.csv
	MP_MPAv1_NewWF_BGP_1_A.csv	1202	Meta-Protein 347	Metagenome unknown	root	1	1	contig139734000013_27, contig1112000059_2, contig785000071_26, contig139608000004_6, contig61432000039_11	VGVAMPTQSLQR		MP_MPAv1_NewWF_BGP_1_A.csv
	MP_MPAv1_NewWF_BGP_1_A.csv	1203	Meta-Protein 348	Metagenome unknown	root	8	13	contig200000032_17, contig2965000058_9, contig87000042_19, contig1112000039_1, contig2963000051_6, contig436000033_2, contig139288000058_14, contig138809000028_18, contig139826000041_13, contig139354000069_35	AGDADVVVAGGMENMSR, AGIKPEMVNEVIMGNVLQAGLGQNPAR, AGLPVEVSAMTINK, DVPAVDLGAIVIK, DVPAVDLGALVIK, GLDPAIMGYGPVASTK, VNVNGGAIAIGHPIGASGARVNVNGGAIALGHPIGASGAR		MP_MPAv1_NewWF_BGP_1_A.csv
	MP_MPAv1_NewWF_BGP_1_A.csv	1204	Meta-Protein 1553	Metagenome unknown	root	1	1	contig413000015_13	SPVILQVSSGAR		MP_MPAv1_NewWF_BGP_1_A.csv
	MP_MPAv1_NewWF_BGP_1_A.csv	1205	Meta-Protein 349	OMPA_ATLHE Outer membrane protein A (Fragment) OS=Atlantibacter hermannii GN=ompA PE=3 SV=1	Enterobacteriaceae	3	7	P24754, P0DJO6, Q8Z7S0, P04845, P24755	LGGMVWR, LSDHDTGVSPLAAVGVEYALTKLSYPIADDLDIYTR		MP_MPAv1_NewWF_BGP_1_A.csv
	MP_MPAv1_NewWF_BGP_1_A.csv	1206	Meta-Protein 350	Metagenome unknown	root	5	4	contig527000079_2, contig33000027_23, Q8TK19, C6BYL8, A6QBT0, Q022T0, contig267000013_35, contig177000036_275, contig2638000018_3, contig25000077_49, contig12282000045_110, contig139391000007_46	IITCHIGNGSSITAVK, IITCHLGNGSSITAVK, VLVINAGSSSIK, VLVINAGSSSLKVLVLNAGSSSLK		MP_MPAv1_NewWF_BGP_1_A.csv
	MP_MPAv1_NewWF_BGP_1_A.csv	1207	Meta-Protein 351	Metagenome unknown	Clostridium perfringens str. 13	1	1	contig139688000012_12, Q8XHV6	VASQVASILR		MP_MPAv1_NewWF_BGP_1_A.csv
	MP_MPAv1_NewWF_BGP_1_A.csv	1208	Meta-Protein 352	Metagenome unknown	root	6	14	contig139799000041_12, ATB_S_contig137501, contig139427000027_9, contig942000059_1, contig138491000043_6, contig7800000041_2	AAIGIMPMWQIDPSEYEFR, GAFYPVDEILPPEYFEK, LPHRDFFTLATR, VYYALDEPQAINALR, YLSGDSQYDIWRYLSGDSQYDLWR		MP_MPAv1_NewWF_BGP_1_A.csv
	MP_MPAv1_NewWF_BGP_1_A.csv	1209	Meta-Protein 353	Metagenome unknown	root	1	2	contig408000008_21, contig62000055_1	YLALLNNIETGK		MP_MPAv1_NewWF_BGP_1_A.csv
	MP_MPAv1_NewWF_BGP_1_A.csv	1210	Meta-Protein 1554	Metagenome unknown	root	1	1	ATB_G30_contig006681	VENLHTYFEVR		MP_MPAv1_NewWF_BGP_1_A.csv
	MP_MPAv1_NewWF_BGP_1_A.csv	1211	Meta-Protein 354	Metagenome unknown	root	41	155	contig139254000022_10, contig139543000030_97, contig139212000073_5, contig5298000065_3, contig12015000042_1, contig315000019_27, contig16912000002_1, contig139845000041_1, contig18471000002_3, contig139849000029_264, contig103000028_32, ATB_G5_contig055533, ATB_S_contig020171, contig10946000046_1, contig2926000068_2, contig6062000020_5, contig140158000023_39	AAETSSTDVTDRIFEGLVTLHR, AAETSSTDVTDRLFEGLVTLHR, AAETSSTDVTGAIFEGLVSLHR, DPNGNPIEFDLITNPGVPIR, DPNGNPIEFDMITNPGVVIR, DPQGNPIEFDLITNPGVPIR, DYEISEDGTEIIFYLR, DYEISEDGTEIIFYLRR, EYEISEDGTEVTFYLR, IASYRIDQELILVR, IDEVWLAAQR, IDEVWVEAQR, IDQELILVR, IFEGLVTLHR, IINLAEEFGMEVGR, ILDVAGDLGDSIGR, ISSYRIDQELILVR, LFEGLVTLHR, LSSYRIDQELILVR, LSWFTDVNFR, NAFPDGIGGSVGSAWNYIWVDR, NATPDAVGGSIGSAWNFMWIDR, NDFFLKD…		MP_MPAv1_NewWF_BGP_1_A.csv
	MP_MPAv1_NewWF_BGP_1_A.csv	1212	Meta-Protein 355	Metagenome unknown	root	1	2	contig41248000017_1, contig8474000040_1	DLTVELPEWVK		MP_MPAv1_NewWF_BGP_1_A.csv
	MP_MPAv1_NewWF_BGP_1_A.csv	1213	Meta-Protein 356	MTRA_METBF Tetrahydromethanopterin S-methyltransferase subunit A OS=Methanosarcina barkeri (strain Fusaro / DSM 804) GN=mtrA PE=3 SV=1	root	7	22	Q9Y8K4, contig139803000041_4, ATB_B_contig061781, O59640	DNRIEGAVGAIPYVENLNAEAIAR, FQEQVEAVDLIDTEDMGAITAK, GHVTGQSMLALHANGVK, GHVTGQSMLALHANGVKDNR, IEGAVGAIPYVENLNAEAIAR, VVAHIISNPNIRYLLVTGSEVK		MP_MPAv1_NewWF_BGP_1_A.csv
	MP_MPAv1_NewWF_BGP_1_A.csv	1214	Meta-Protein 357	Metagenome unknown	root	1	2	contig104000071_149, contig139187000034_93	LSRPTPTTVLGTNNASSLAER		MP_MPAv1_NewWF_BGP_1_A.csv
	MP_MPAv1_NewWF_BGP_1_A.csv	1215	Meta-Protein 358	Metagenome unknown	root	4	4	contig2135000033_18, contig205000042_6, contig8433000022_35, contig112845000079_8, contig139431000012_8, contig420000075_9, contig140067000054_18	SLGSSNPINVVR, SLGSSNPLNVVR, VILKPASEGTGVIAGGPVRVLLKPASEGTGVIAGGPVR		MP_MPAv1_NewWF_BGP_1_A.csv
	MP_MPAv1_NewWF_BGP_1_A.csv	1216	Meta-Protein 359	Metagenome unknown	root	1	1	contig139488000056_10, contig34000021_53	GTAQNPDIYFQTR		MP_MPAv1_NewWF_BGP_1_A.csv
	MP_MPAv1_NewWF_BGP_1_A.csv	1217	Meta-Protein 360	Metagenome unknown	root	3	3	ATB_S_contig064681, contig115000052_118, contig674000002_2	EIQVFHTVLQTPDNQK, VIIPNSDLSNASAINYSAYDTRVPISFDSDFKR		MP_MPAv1_NewWF_BGP_1_A.csv
	MP_MPAv1_NewWF_BGP_1_A.csv	1218	Meta-Protein 361	Metagenome unknown	root	1	1	contig2095000056_17, contig6519000054_1	AIISVDANTQSHGVVIR		MP_MPAv1_NewWF_BGP_1_A.csv
	MP_MPAv1_NewWF_BGP_1_A.csv	1219	Meta-Protein 362	G3P1_KLUMA Glyceraldehyde-3-phosphate dehydrogenase 1 OS=Kluyveromyces marxianus GN=GAP1 PE=1 SV=1	root	10	20	P84998, P00356, P49433, contig51338000062_3, contig16956000000_15, contig139344000010_194, contig26000044_58, contig140013000054_1, contig139141000010_5, contig450000075_1, contig1153000049_2, P00359, contig139197000000_7	DDIQVVGVNDLLDVDYIAYMLK, GILGYTDEDVVSSDFIGDPR, IVSNASCTTNCLAPIAK, IVSNASCTTNCLAPLAK, VISWYDNEWGYSCK, VLHDNFGVLEGLMTTVHSTTATQK, VPTIDVSVVDLTVR, VPTLDVSVVDLTVR, WGEIGADYVVESTGLFLTKYDTVHGQFKGTIEVK		MP_MPAv1_NewWF_BGP_1_A.csv
	MP_MPAv1_NewWF_BGP_1_A.csv	1220	Meta-Protein 363	Metagenome unknown	root	5	5	contig139361000007_202, contig1732000014_2, Q7MTV8, B2RLL7, contig46390000009_4, Q2NJ39, contig36991000053_4, contig1481000052_1	AAVPSGASTGENEAIELR, AAVPSGASTGENEALELR, CQLVGDDLFVTNVEFLEK, SGETEDTTIADIAVATNSGQIKSGETEDTTIADLAVATNSGQIK		MP_MPAv1_NewWF_BGP_1_A.csv
	MP_MPAv1_NewWF_BGP_1_A.csv	1221	Meta-Protein 364	Metagenome unknown	root	6	12	contig751000074_2, contig138644000035_12	HKLEPYIAALNR, RVFDLFELGEVEMDVAQR, SAGEFEVMIEAFGNQPDPQLRK, VDPEGNQLPYVDR, VFDLFELGEVEMDVAQRVLSHALMVPK		MP_MPAv1_NewWF_BGP_1_A.csv
	MP_MPAv1_NewWF_BGP_1_A.csv	1222	Meta-Protein 365	Metagenome unknown	root	2	1	contig1365000070_3, contig960000064_1, contig21823000023_1, contig10018000002_2	VAVIGGGNVAMDAARVAVLGGGNVAMDAAR		MP_MPAv1_NewWF_BGP_1_A.csv
	MP_MPAv1_NewWF_BGP_1_A.csv	1223	Meta-Protein 366	Metagenome unknown	root	1	1	contig2343000064_1, contig139215000058_4, contig986000046_1	IIEPDDAIVR		MP_MPAv1_NewWF_BGP_1_A.csv
	MP_MPAv1_NewWF_BGP_1_A.csv	1224	Meta-Protein 367	Metagenome unknown	root	14	41	contig10807000017_1, contig10100000053_3, contig11119000027_11, contig10100000053_1, contig4153000047_5, contig6729000062_1, Q2FRN2, contig4402000076_1, contig34410000039_2	AKDPGAFPGEPMIVEVK, EAGAAAEEVTGEVQPLSGELALMHAR, FQDQVEMVNIMESEDMGTIK, FQEQVEIVNIMETEDLGTIK, GHLSGQSFIALHQNGVSEGR, GHLSGQSFMALHAGGVSGGK, IEFVDAEMAQR, IIEQMVTDIGYR, IVGAEGAIPFIENLSDEAIKR, IVGAQGAIPFIENLPDEAIK, IVGAQGAIPFIENLPDEAIKR, KIEFVDAEMAQR, KSPASGWPIVKVIANVISNPNIR		MP_MPAv1_NewWF_BGP_1_A.csv
	MP_MPAv1_NewWF_BGP_1_A.csv	1225	Meta-Protein 368	Metagenome unknown	root	1	1	contig139430000056_92, contig288000068_33	YTYPACAITVR		MP_MPAv1_NewWF_BGP_1_A.csv
	MP_MPAv1_NewWF_BGP_1_A.csv	1226	Meta-Protein 369	Metagenome unknown	root	18	56	contig76000016_6, contig2248000015_39, contig45067000015_2, contig1309000045_7, contig1069000072_1	AAELYQEWSKR, ATDFMGQTDIGFAATR, DIPGSAAAQQAMTWK, DLPDDDPAHAYIK, DLPDIFQSWGGSVMGGYADAGR, DLPHIFQSWGGSVMGGYADAGR, ELKDIPGSAAAQQAMTWK, FGGMEAFDNAQAR, GFFGATPLGEAYGDAQQLMATGK, GYFGPTPLGEAYGDAQQLMATGK, IGFYPFPVLEGGK, LLTNYEMVVEENVGPAK, NPDIELEYLALGDPGLMDK, NPDIELEYLALGDPGLMDKTK, RGYFGPTPLGEAYGDAQQLMATGK, VADTLLANGIQPFAVGAR, YAMSVEACSAELGRYNLEVPTTIAEMEK		MP_MPAv1_NewWF_BGP_1_A.csv
	MP_MPAv1_NewWF_BGP_1_A.csv	1227	Meta-Protein 1555	Metagenome unknown	root	1	1	contig32243000070_1	TGNDFPYEIK		MP_MPAv1_NewWF_BGP_1_A.csv
	MP_MPAv1_NewWF_BGP_1_A.csv	1228	Meta-Protein 370	Metagenome unknown	root	1	1	contig509000020_13, contig1035000057_4	SIDLVVNKLER		MP_MPAv1_NewWF_BGP_1_A.csv
	MP_MPAv1_NewWF_BGP_1_A.csv	1229	Meta-Protein 1556	Metagenome unknown	root	1	1	ATB_B_contig065461	VISGINTDYNGDLR		MP_MPAv1_NewWF_BGP_1_A.csv
	MP_MPAv1_NewWF_BGP_1_A.csv	1230	Meta-Protein 371	Metagenome unknown	root	3	6	contig6246000022_2, contig627000036_1, contig231000078_2, contig139929000023_5	IYGAFVEHLGR, LYGAFVEHLGRTIEPNEVGVNEFVDWTR		MP_MPAv1_NewWF_BGP_1_A.csv
	MP_MPAv1_NewWF_BGP_1_A.csv	1231	Meta-Protein 372	Metagenome unknown	root	12	41	contig17762000015_1, contig4872000000_4, contig139646000036_29, contig14550000043_5, contig137000036_5, ATB_S_contig103591, contig43000039_30, contig2229000073_1, contig894000034_1, contig4549000067_53, contig7895000025_2	AIVVCQAVPGTTAAFK, DIRPDIVLIAGVPHEDPAVIGPVADIAMETDQLR, DIRPDIVLIAGVPHEDPAVIGPVADIAMETDQLRR, GPAIAQLAAEMGAK, HIQEGLDFSDMAAVEEAIYEATGVR, HMSMELLAVR, IGLITGTVSQGEEEYQAALK, KILHYSFPR, KLIHYSFPR, LGLEVIEVTAPDPMGDAGLPGTQQFILEDIPR, QAAIHGTDIAFFGTNCGMMEPAIRRGPAIAQLAAEMGAK		MP_MPAv1_NewWF_BGP_1_A.csv
	MP_MPAv1_NewWF_BGP_1_A.csv	1232	Meta-Protein 373	Metagenome unknown	root	1	1	contig8718000033_11, contig3688000020_2	NPEEVIQIPASK		MP_MPAv1_NewWF_BGP_1_A.csv
	MP_MPAv1_NewWF_BGP_1_A.csv	1233	Meta-Protein 374	Metagenome unknown	root	1	1	contig1608000069_2, contig34719000054_1	LEHTIANLGTSAENLQAAESR		MP_MPAv1_NewWF_BGP_1_A.csv
	MP_MPAv1_NewWF_BGP_1_A.csv	1234	Meta-Protein 375	Metagenome unknown	root	1	1	contig504000057_5, contig2284000050_21	TLHPDNMAAGPASYGMTDTMGR		MP_MPAv1_NewWF_BGP_1_A.csv
	MP_MPAv1_NewWF_BGP_1_A.csv	1235	Meta-Protein 376	Metagenome unknown	root	2	3	contig1206000032_3, contig25109000011_2, contig25498000058_2	AVAEAIVEATEKIGNSIVEDDKLDLAR		MP_MPAv1_NewWF_BGP_1_A.csv
	MP_MPAv1_NewWF_BGP_1_A.csv	1236	Meta-Protein 377	Metagenome unknown	root	1	6	contig139015000072_38, contig12446000077_15, contig1066000014_1, contig13605000040_10	LIAIDEMR		MP_MPAv1_NewWF_BGP_1_A.csv
	MP_MPAv1_NewWF_BGP_1_A.csv	1237	Meta-Protein 378	Metagenome unknown	root	2	3	contig1219000015_23, contig326000018_17, B2UYA9	LIDIVNPSPKVSGPVPLPTEKDVVTILR		MP_MPAv1_NewWF_BGP_1_A.csv
	MP_MPAv1_NewWF_BGP_1_A.csv	1238	Meta-Protein 379	ENO_STAAM Enolase OS=Staphylococcus aureus (strain Mu50 / ATCC 700699) GN=eno PE=3 SV=1	Bacilli	1	2	P64078, A8Z1A4, Q6GIL4, Q032H8	GLETAVGDEGGFAPK		MP_MPAv1_NewWF_BGP_1_A.csv
	MP_MPAv1_NewWF_BGP_1_A.csv	1239	Meta-Protein 380	Metagenome unknown	root	1	5	contig48000009_31, contig48000009_29, contig48000009_37, contig48000009_27	VSQAVMEHVGADAWADDAAR		MP_MPAv1_NewWF_BGP_1_A.csv
	MP_MPAv1_NewWF_BGP_1_A.csv	1240	Meta-Protein 381	Metagenome unknown	root	1	1	contig113000072_32, contig2918000076_2	VVYDTYATNEDMYVK		MP_MPAv1_NewWF_BGP_1_A.csv
	MP_MPAv1_NewWF_BGP_1_A.csv	1241	Meta-Protein 382	Metagenome unknown	root	1	2	contig34410000039_4, contig11660000038_1, contig67025000038_9, contig2388000040_5	IIANVISNPNIR		MP_MPAv1_NewWF_BGP_1_A.csv
	MP_MPAv1_NewWF_BGP_1_A.csv	1242	Meta-Protein 383	Metagenome unknown	root	7	17	contig67000050_12, contig140255000023_15, contig104000071_175, contig139187000034_67, contig139099000047_24, contig12981000023_3, contig35623000066_1	ASFEDEDLFYAYIAGMDAFAK, EGYETLLNTDTALELDNYAR, LLQMAVDYAK, SGRQEMLESILNQYILETN, VGLKELEEYALK, YASYTEGIGKDIVEGKYYNPDEVIMGK		MP_MPAv1_NewWF_BGP_1_A.csv
	MP_MPAv1_NewWF_BGP_1_A.csv	1243	Meta-Protein 384	Metagenome unknown	root	61	292	contig139745000013_49, contig935000044_1, contig2562000049_43, contig941000004_45, contig26480000020_1, contig1688000057_15, contig7432000027_10, contig60098000022_7, contig1142000052_1, contig138936000025_40, contig25049000035_1, contig936000078_39, contig139043000050_31, contig163000033_64, contig12275000016_1, ATB_S_contig046843, contig28232000075_1, contig31808000072_1, ATB_S_contig046842	AAAAAAAEKEPIETTVIER, AAIDWELEPFAWTQK, ADASAEFDVFVPVTLSAEVMGAQTK, ADKPEGAMFDQYAAGVGLFGK, AELMAEIEAAK, AGANLGYGFDWSGAK, AMIAALSDWVDELDGDVAVLK, AMIAALSDWVDELDGDVAVLKEDVAGLKEDVAAVEDR, AMIAALSEWVDEIDTDVAAVK, ANEVAIEALTGDMAYLEAR, AQVSRLELLINENR, ASDSGEIDVAAALEYK, ATFDPVTLDLK, ATTPELTKEDVEFIAEALIR, DQPEVEVPSMDEIEELIAK, EANYNVTSGGLVYK, EANYNVTSGGLVYKDDFK, EDVEFIAEALIR, EGQDERDYGLTHSLNLSYAFTDNVK, ELTKEDVE…		MP_MPAv1_NewWF_BGP_1_A.csv
	MP_MPAv1_NewWF_BGP_1_A.csv	1244	Meta-Protein 385	Metagenome unknown	root	1	1	contig94000063_11, contig373000047_1, contig139626000014_3	MPVTGEVLQVR		MP_MPAv1_NewWF_BGP_1_A.csv
	MP_MPAv1_NewWF_BGP_1_A.csv	1245	Meta-Protein 1557	Metagenome unknown	root	1	1	contig139432000022_15	GAIIDRSGGDCVLLTVTDLTR		MP_MPAv1_NewWF_BGP_1_A.csv
	MP_MPAv1_NewWF_BGP_1_A.csv	1246	Meta-Protein 386	Metagenome unknown	root	2	3	contig293000012_4, contig104000009_1, contig139011000072_8	AANIPVIAYDRSGQTKFPDEIAIVNWEAK		MP_MPAv1_NewWF_BGP_1_A.csv
	MP_MPAv1_NewWF_BGP_1_A.csv	1247	Meta-Protein 387	Metagenome unknown	root	1	2	contig7024000018_1, contig139660000036_26, contig195000017_3	LIYTTAITATPAGEGK		MP_MPAv1_NewWF_BGP_1_A.csv
	MP_MPAv1_NewWF_BGP_1_A.csv	1248	Meta-Protein 388	Metagenome unknown	root	1	2	contig1397000036_7, contig138924000076_34, contig139003000047_10	LIDYLVQR		MP_MPAv1_NewWF_BGP_1_A.csv
	MP_MPAv1_NewWF_BGP_1_A.csv	1249	Meta-Protein 389	Metagenome unknown	root	1	1	ATB_S_contig007353, contig4577000044_2	QVVEIQESPGLVNPR		MP_MPAv1_NewWF_BGP_1_A.csv
	MP_MPAv1_NewWF_BGP_1_A.csv	1250	Meta-Protein 390	Metagenome unknown	root	5	13	contig11596000008_5, contig139074000060_14, ATB_S_contig016811, contig6827000060_9, contig7815000042_3, contig5453000047_2	AALPTIQHVIK, ALAALGDIFVNDAFGTAHR, AVAGLEPGDVLLLENVR, FYAAETENDPEFAKVLPGVAALDDK		MP_MPAv1_NewWF_BGP_1_A.csv
	MP_MPAv1_NewWF_BGP_1_A.csv	1251	Meta-Protein 391	PSAB_ANTMA Photosystem I P700 chlorophyll a apoprotein A2 OS=Antirrhinum majus GN=psaB PE=3 SV=1	root	2	3	Q33332, A6MM35, P31088, Q9MTN7, Q85FY6, A4QL18, Q09MH9	TPIANLIRTPLANLIR		MP_MPAv1_NewWF_BGP_1_A.csv
	MP_MPAv1_NewWF_BGP_1_A.csv	1252	Meta-Protein 392	GLPK_BACCR Glycerol kinase OS=Bacillus cereus (strain ATCC 14579 / DSM 31 / JCM 2152 / NBRC 15305 / NCIMB 9373 / NRRL B-3711) GN=glpK PE=3 SV=1	Bacteria	1	4	Q81GZ2, C1EKE4, A0Q880, P18157, Q2YXR6, B7HG04, contig299000001_9	VKWILDNVEGAR		MP_MPAv1_NewWF_BGP_1_A.csv
	MP_MPAv1_NewWF_BGP_1_A.csv	1253	Meta-Protein 1558	Metagenome unknown	root	1	1	contig139742000013_9	TVLIANTSNMPVAAR		MP_MPAv1_NewWF_BGP_1_A.csv
	MP_MPAv1_NewWF_BGP_1_A.csv	1254	Meta-Protein 393	Metagenome unknown	root	1	1	contig13205000017_13, contig6763000006_3	ALFEATSDPDAENLK		MP_MPAv1_NewWF_BGP_1_A.csv
	MP_MPAv1_NewWF_BGP_1_A.csv	1255	Meta-Protein 394	MTD_METB6 F420-dependent methylenetetrahydromethanopterin dehydrogenase OS=Methanoregula boonei (strain DSM 21154 / JCM 14090 / 6A8) GN=mtd PE=3 SV=1	root	14	49	A7I5N7, contig1209000055_27, A3CSZ5, contig57933000018_3, O29544, contig14110000014_1, contig38136000070_2, contig34095000000_3, contig139178000057_1, Q2FU89, B8GJQ7	AAYEIAQQVAAVNVK, ADREDMITFMATSGTK, AVEGEFSNPYALAK, DQFAALKESDFGYIIMK, EFLDPIEMADYNGNLIK, KMQMELDKVIDQVK, LGNIASGVMAELLLDER, LQPEDIDRVVNNMK, MQMELDKVIDQVK, QAMYLCEEARELEK, REFLDPIEMADYNGNLIK, VVMTADKAVEGEFSNPYALAK, YIPIVASAHEMMRYIPLVASAHEMMR		MP_MPAv1_NewWF_BGP_1_A.csv
	MP_MPAv1_NewWF_BGP_1_A.csv	1256	Meta-Protein 395	Metagenome unknown	root	3	4	contig353000068_3, contig2974000052_1, contig1327000030_1, contig33919000010_1, contig139658000046_3	VISWYDNEWGYSNK, VLDLIAHMAKVLSWYDNEWGYSNK		MP_MPAv1_NewWF_BGP_1_A.csv
	MP_MPAv1_NewWF_BGP_1_A.csv	1257	Meta-Protein 396	Metagenome unknown	root	1	1	contig5608000010_1, ATB_G5_contig057212	AAAFGSYGWSGEAVK		MP_MPAv1_NewWF_BGP_1_A.csv
	MP_MPAv1_NewWF_BGP_1_A.csv	1258	Meta-Protein 397	Metagenome unknown	root	1	2	contig3367000019_1, contig8349000057_1, contig31489000006_1	LDYTVNNLNTASENVTAANSR		MP_MPAv1_NewWF_BGP_1_A.csv
	MP_MPAv1_NewWF_BGP_1_A.csv	1259	Meta-Protein 398	Metagenome unknown	root	11	25	contig139379000010_154, contig139615000068_18, contig89641000049_1, contig7082000042_1, contig139573000041_2	GIPSISYDMSYANQSLAR, LAFSADYFDKK, LEGAIGGVDGTNNPIR, NGNINVLNNYR, NILRDPDNGLYYATSK, SDALQNIITPDAAAALQGK, SWLQVGTNNSIEK, VSGVQVLTNSGAPGEGASIR, VSQSNSHSFSTPYYATPQAK, WETSDQLDLGVEMRYITDDSGNPLLQR		MP_MPAv1_NewWF_BGP_1_A.csv
	MP_MPAv1_NewWF_BGP_1_A.csv	1260	Meta-Protein 399	Metagenome unknown	root	16	59	contig3458000041_4, contig7937000043_2, ATB_G30_contig006001, contig139888000029_11, contig138985000072_84, ATB_S_contig021511, contig145000023_6, ATB_G5_contig055222, ATB_S_contig015601	DDWDRSPTGMLFGEPAPK, GHAVSDDPAELRETFGIGWFK, ITITDINDVAHHQFK, NETLYVTMLTGR, NFALDLGDGELFYPYDPDVALR, RDDWDRSPTGMLFGEPAPK, SLQIFDSQYMAPLGEPNR, SLQIFDSQYMAPLGEPNRGHGSR, SPTGMLFGEPAPK, TGDYEVVFELK, TGDYEVVFELKQPDSR, VGTPSNFNEWVGWR, VLAQLTHQLDVADYDAESFAAAMAQGETIR, WSTPEMDDIIR, YMLPFLQPTGNKYVLFQTFADNSAK		MP_MPAv1_NewWF_BGP_1_A.csv
	MP_MPAv1_NewWF_BGP_1_A.csv	1261	Meta-Protein 400	PSBC_ACOAM Photosystem II CP43 reaction center protein OS=Acorus americanus GN=psbC PE=3 SV=1	Streptophyta	1	2	A9LYI1, B5LMM0, Q3V538, A4QKS7	SPTGEVIFGGETMR		MP_MPAv1_NewWF_BGP_1_A.csv
	MP_MPAv1_NewWF_BGP_1_A.csv	1262	Meta-Protein 401	RL20_STRT2 50S ribosomal protein L20 OS=Streptococcus thermophilus (strain ATCC BAA-250 / LMG 18311) GN=rplT PE=3 SV=1	Streptococcus	1	1	Q5M472, Q3K0D0, Q03KJ1, A4W251	MLADLAVNDAAAFTALADAAKAK		MP_MPAv1_NewWF_BGP_1_A.csv
	MP_MPAv1_NewWF_BGP_1_A.csv	1263	Meta-Protein 402	Metagenome unknown	root	4	5	contig139275000074_14, contig139160000057_13, contig30000046_29, contig139162000057_7, contig4604000019_21	FHPGVSLEEVK, IVAVGEWAPK, TACDALGLDPAVYEILKEPQRVIEVNIPVR		MP_MPAv1_NewWF_BGP_1_A.csv
	MP_MPAv1_NewWF_BGP_1_A.csv	1264	Meta-Protein 403	Metagenome unknown	root	9	21	contig48306000053_2, contig839000072_4, P51009, contig615000037_3, contig2713000054_1, contig1076000073_1	AVGLVIPEIAGK, AVGLVIPELAGK, AVGLVIPELAGKLDGGAQR, AVGLVLPELAGK, GFMTTIHAYTNDQNTLDAPHR, LMIDNPEYNVVAINDLTDAK, VAAWYDNEMSYTNQLIR, VPTITGSITELVCTLDKVTANANPAELPWK		MP_MPAv1_NewWF_BGP_1_A.csv
	MP_MPAv1_NewWF_BGP_1_A.csv	1265	Meta-Protein 1559	Metagenome unknown	root	1	4	contig138966000045_7	NQLLLNEAAK		MP_MPAv1_NewWF_BGP_1_A.csv
	MP_MPAv1_NewWF_BGP_1_A.csv	1266	Meta-Protein 404	Metagenome unknown	root	1	2	contig1024000071_1, contig138984000072_32, contig199000036_3	LVTQLFGDR		MP_MPAv1_NewWF_BGP_1_A.csv
	MP_MPAv1_NewWF_BGP_1_A.csv	1267	Meta-Protein 405	Metagenome unknown	root	1	1	contig53_62, contig58625000024_3	TVLIANTSDMPVAAR		MP_MPAv1_NewWF_BGP_1_A.csv
	MP_MPAv1_NewWF_BGP_1_A.csv	1268	Meta-Protein 406	Metagenome unknown	root	1	1	contig139118000061_6, contig139633000012_10	MTIEQVDAITGPPMGHPK		MP_MPAv1_NewWF_BGP_1_A.csv
	MP_MPAv1_NewWF_BGP_1_A.csv	1269	Meta-Protein 407	Metagenome unknown	root	1	1	contig48221000022_2, contig139798000078_50, contig245000006_1	GVDALAINPVDR		MP_MPAv1_NewWF_BGP_1_A.csv
	MP_MPAv1_NewWF_BGP_1_A.csv	1270	Meta-Protein 408	Metagenome unknown	root	1	1	contig13883000043_1, contig1640000023_1	STVVTGVEMFR		MP_MPAv1_NewWF_BGP_1_A.csv
	MP_MPAv1_NewWF_BGP_1_A.csv	1271	Meta-Protein 409	PSBD_ARATH Photosystem II D2 protein OS=Arabidopsis thaliana GN=psbD PE=1 SV=3	root	5	7	P56761, Q4G395, B0Z4V6, Q33C42, Q8M9W4, B2XTH7, Q1KXW4, A0ZZ30, P28253, A6MMT9, Q116J3, Q5MZ82, Q6H956, A2T330, Q7Y4H2, Q7YJX7, A4QKA0	AAEDPEFETFYTK, AYDFVSQEIR, AYDFVSQELR, NILLNEGIRNILLNEGLR		MP_MPAv1_NewWF_BGP_1_A.csv
	MP_MPAv1_NewWF_BGP_1_A.csv	1272	Meta-Protein 410	Metagenome unknown	root	12	40	contig758000028_2, contig139628000068_78, P0CW04	ADLALEIFAYK, CGSIDPAVVPFIMEK, CGSIDPAVVPFIMEKENLSTR, FTSSALIDADVEK, IGITDSIITQK, ILSGLENFGVK, SGVLGVSGVSNDFR, SLTDPEFGVIKDMGEINAVGHR, SVETTMGFTPLEGVCMGTR, VFVIPTNEELTIAR, YAYMYALPYEVYEKYQLIDMTTESPLAIGLCER		MP_MPAv1_NewWF_BGP_1_A.csv
	MP_MPAv1_NewWF_BGP_1_A.csv	1273	Meta-Protein 411	Metagenome unknown	root	2	1	contig13194000005_16, contig139322000027_7, contig1029000042_4	HPYTQALLSAIPEADPTIKKHPYTQALLSAIPEADPTLKK		MP_MPAv1_NewWF_BGP_1_A.csv
	MP_MPAv1_NewWF_BGP_1_A.csv	1274	Meta-Protein 412	Metagenome unknown	root	18	72	contig70000003_5, contig56439000051_6, contig30941000066_1, contig99786000042_2, contig31762000072_3, contig37023000022_3, contig140045000023_5, contig26874000040_1	DGDIVEQVLEK, DLIKPVVVIEE, DMILGHEAVGEVVEVGSLVK, FIHCGLMLGGR, FKGFDKLEEALLLMK, GFDKLEEALLLMK, GVDKVCIAGGDVHTIEQAIK, GYGATDIVNYK, GYGATDIVNYKDGDIVEQVLEK, IGEIGWIEK, IGEIGWIEKEAPK, KIGEIGWIEK, KIGEIGWIEKEAPK, LASLVETGKLDLSPMITHR, LDLSPMITHR, MLKPGGIVGNVNYLGSGEYVTIPR, TDGKGVDKVCIAGGDVHTIEQAIKVCIAGGDVHTIEQAIK		MP_MPAv1_NewWF_BGP_1_A.csv
	MP_MPAv1_NewWF_BGP_1_A.csv	1275	Meta-Protein 413	Metagenome unknown	root	1	1	contig966000030_1, contig597000015_13	AVASHALSIFGDHSDVMAAR		MP_MPAv1_NewWF_BGP_1_A.csv
	MP_MPAv1_NewWF_BGP_1_A.csv	1276	Meta-Protein 414	Metagenome unknown	root	2	2	contig2455000069_14, contig3010000065_1, contig1388000038_2, contig2234000071_8, contig1546000030_11, contig1275000073_10	IGIVTGTVSQGEEEFRIGLVTGTVSQGEEEFR		MP_MPAv1_NewWF_BGP_1_A.csv
	MP_MPAv1_NewWF_BGP_1_A.csv	1277	Meta-Protein 415	Metagenome unknown	root	2	4	contig338000040_12, contig298000047_5	AVECGYWNLYRSALAEAGRGEIEVVGGR		MP_MPAv1_NewWF_BGP_1_A.csv
	MP_MPAv1_NewWF_BGP_1_A.csv	1278	Meta-Protein 416	Metagenome unknown	root	1	1	contig4648000079_1, contig6639000017_6	VMLEAFGGAAVK		MP_MPAv1_NewWF_BGP_1_A.csv
	MP_MPAv1_NewWF_BGP_1_A.csv	1279	Meta-Protein 417	Metagenome unknown	root	1	1	contig16000045_4, contig3344000035_2	SLGHGDVNFEEIIR		MP_MPAv1_NewWF_BGP_1_A.csv
	MP_MPAv1_NewWF_BGP_1_A.csv	1280	Meta-Protein 418	Metagenome unknown	root	3	4	ATB_G30_contig013251, contig4305000067_20, contig17384000067_1	IAYVETPENLMK, IGAIITDNPEFATRLFNLDAPESPFNK		MP_MPAv1_NewWF_BGP_1_A.csv
	MP_MPAv1_NewWF_BGP_1_A.csv	1281	Meta-Protein 419	Metagenome unknown	root	3	4	contig5037000004_9, contig3937000039_7, C3KVP5, contig326000018_10	ADIDYGFAEADTTYGK, NVETNAQLVAENIAAQLEKNVETNAQLVAENIAAQLEKR		MP_MPAv1_NewWF_BGP_1_A.csv
	MP_MPAv1_NewWF_BGP_1_A.csv	1282	Meta-Protein 420	Metagenome unknown	root	3	10	contig139131000015_10, contig1529000075_5, contig732000013_2	HANDFYALSEGKEVDAR, LEYETGQVPFNDEKTQLTGGTGPDLMYVR		MP_MPAv1_NewWF_BGP_1_A.csv
	MP_MPAv1_NewWF_BGP_1_A.csv	1283	Meta-Protein 421	Metagenome unknown	root	1	3	contig28797000007_4, contig4511000064_1, contig19782000022_1, contig593000051_29	IIQLGGTPVINPK		MP_MPAv1_NewWF_BGP_1_A.csv
	MP_MPAv1_NewWF_BGP_1_A.csv	1284	Meta-Protein 422	PSB_METMA Proteasome subunit beta OS=Methanosarcina mazei (strain ATCC BAA-159 / DSM 3647 / Goe1 / Go1 / JCM 11833 / OCM 88) GN=psmB PE=3 SV=1	root	3	7	Q8PZ04, contig5383000018_20, Q12YV7, Q9P992, Q46G14	DSASGENIDVVVITK, NGPGIYSLDALGGSIEETRVYQVDDLVAMTIAGSVGDAQQLVR		MP_MPAv1_NewWF_BGP_1_A.csv
	MP_MPAv1_NewWF_BGP_1_A.csv	1285	Meta-Protein 423	Metagenome unknown	root	6	12	contig139827000054_1, contig139497000056_2, contig57381000004_2, contig616000034_2	ENKDTYSIDKGFGLR, LTVAMNDESLYGYIIK, QTYGFSGHMTGDCDSVNTISR, SYQEMLQDAVDNVMK, TAVSDYIPVTVKVLTVKPSQEGDESIGVEER		MP_MPAv1_NewWF_BGP_1_A.csv
	MP_MPAv1_NewWF_BGP_1_A.csv	1286	Meta-Protein 424	Metagenome unknown	root	10	18	contig139946000046_16, contig139677000014_48, contig1062000023_1, contig1219000044_4, contig706000009_2, contig139280000000_21, contig28008000020_1, contig973000026_65, contig128999000034_13, contig139470000067_4, contig1219000044_3, contig54344000033_9, contig139181000000_18	DLPTLLQTR, EMAELLNTADVFR, IAAGNPPDVAAIPGPGAMK, IAAGNPPDVAALPGPGAMK, LAAGNPPDVAAIPGPGAMK, LGTNNKIDPAAYPDDLTR, QASFITGFIADANPDVVIGK, QASFITSFITDANPDVVLGR, VIDPQVLAEDYNNAWIELGTYKVKEAFEIFGK		MP_MPAv1_NewWF_BGP_1_A.csv
	MP_MPAv1_NewWF_BGP_1_A.csv	1287	Meta-Protein 425	Metagenome unknown	root	26	59	contig2345000035_1, contig7071000023_87, Q46509, contig139248000015_100, contig17866000064_1, contig2041000026_1, contig552000027_7, contig66170000024_4, contig4556000076_1, contig139237000074_77, contig4945000038_9, contig371000046_1, contig960000075_40, ATB_G5_contig064611, contig85000024_1, contig22417000044_1	ADYVVSMEDLFVGR, AGMPQIKDVPDNIR, AKYTVEDDFYVGR, ALRKPDGTYMTYDEVIEK, AVVDGQIYGGMAQGIGLALTEDFEDLKK, AYGSPQSLFASETLMDVLAEK, CTGYIPIVDAVMDAAR, CTGYIPLVDAVMDAAR, CTGYKPLVDAVMDAAR, GAQFIGAGYGIPNIR, GTQFMGAGYNIPNIR, GYGSPQSLFSSEVLIDK, ITKLPALPEK, LAAEMGVDPFELR, LVMNDMALAPAGGPAGGSR, MGMDPLELR, SPFFIDIK, SPFFIDLK, SPFFMNVK, TTLVVDPDALLVDVLR, TVATNHAWGSAFR, VFQYGDVLAIVLSENPK, VTGTIDYGADLGLK, VTGTLDYGADLGLK,…		MP_MPAv1_NewWF_BGP_1_A.csv
	MP_MPAv1_NewWF_BGP_1_A.csv	1288	Meta-Protein 426	Metagenome unknown	root	5	16	contig35000055_19, contig138985000072_45, contig2755000011_1, contig65483000024_1, contig559000009_1, ATB_G5_contig064642, contig47105000023_1	CLNQYSNLPIMVSTR, NPEAAAIFVNWLNSHPDSLR, QDLFDQYGLEVPTTWDDFAAQAR, QDLFDQYGLEVPTTWEEFAEQARVVWEDFGVHYEK		MP_MPAv1_NewWF_BGP_1_A.csv
	MP_MPAv1_NewWF_BGP_1_A.csv	1289	Meta-Protein 427	Metagenome unknown	root	2	5	contig469000068_191, contig63585000056_2, contig6183000009_1	KLLDEAQAGDNVGVLLRLLDEAQAGDNVGVLLR		MP_MPAv1_NewWF_BGP_1_A.csv
	MP_MPAv1_NewWF_BGP_1_A.csv	1290	Meta-Protein 428	Metagenome unknown	root	2	4	contig968000027_6, contig16000010_7, contig138952000045_5, contig1649000055_12	NIMANHVVALASKSILEVPQNNEGAGYALR		MP_MPAv1_NewWF_BGP_1_A.csv
	MP_MPAv1_NewWF_BGP_1_A.csv	1291	Meta-Protein 429	Metagenome unknown	root	1	1	contig349000057_46, contig1894000004_32	AAVPSGASTGAFEAVELR		MP_MPAv1_NewWF_BGP_1_A.csv
	MP_MPAv1_NewWF_BGP_1_A.csv	1292	Meta-Protein 1560	Metagenome unknown	root	1	1	contig57393000079_1	AGIPSGASTGAFEAVELR		MP_MPAv1_NewWF_BGP_1_A.csv
	MP_MPAv1_NewWF_BGP_1_A.csv	1293	Meta-Protein 430	Metagenome unknown	root	2	1	contig1325000019_13, contig139636000014_13, contig746000052_2	TTASIQGFGNVAEYAARTTASLQGFGNVAEYAAR		MP_MPAv1_NewWF_BGP_1_A.csv
	MP_MPAv1_NewWF_BGP_1_A.csv	1294	Meta-Protein 431	Metagenome unknown	root	2	1	contig139209000057_62, contig139528000027_22, contig138824000055_6, contig139944000004_61	ILDTSVIIDGRLLDTSVIIDGR		MP_MPAv1_NewWF_BGP_1_A.csv
	MP_MPAv1_NewWF_BGP_1_A.csv	1295	Meta-Protein 432	Metagenome unknown	root	8	16	contig20094000002_2, contig4874000056_1, contig1365000023_1, contig517000010_3, contig787000044_50, contig6449000044_5, contig639000043_1, contig139260000000_21, contig138924000076_90, contig72000008_10, contig94000060_3, contig2406000038_19, contig3479000011_6, contig678000047_1, contig14061000021_1	FNESVQTWNTTIR, GYASHEQQVFADVAEAR, LLAISEAYPELK, LLAISEAYPELKADTSFIR, LLALSEAYPELK, RADLIPNLVETVK, RFFEASPGAQEVPQVSFTPEDQMEANASLDSALGR		MP_MPAv1_NewWF_BGP_1_A.csv
	MP_MPAv1_NewWF_BGP_1_A.csv	1296	Meta-Protein 433	Metagenome unknown	root	1	1	contig3079000050_5, contig1610000074_5	IAQEMVLGIGGVK		MP_MPAv1_NewWF_BGP_1_A.csv
	MP_MPAv1_NewWF_BGP_1_A.csv	1297	Meta-Protein 434	Metagenome unknown	root	1	1	contig897000046_15, contig49353000079_15	INSLDYSLLSR		MP_MPAv1_NewWF_BGP_1_A.csv
	MP_MPAv1_NewWF_BGP_1_A.csv	1298	Meta-Protein 435	Metagenome unknown	root	1	1	contig139311000010_37, contig6630000067_6	GFAVAMSALDNAR		MP_MPAv1_NewWF_BGP_1_A.csv
	MP_MPAv1_NewWF_BGP_1_A.csv	1299	Meta-Protein 436	Metagenome unknown	root	1	1	contig139203000034_22, contig109000057_5	YSISDTAQYGDLTVGPR		MP_MPAv1_NewWF_BGP_1_A.csv
	MP_MPAv1_NewWF_BGP_1_A.csv	1300	Meta-Protein 437	Metagenome unknown	root	1	1	contig89222000058_10, contig139428000077_26	GLNSSYAIFQDATGK		MP_MPAv1_NewWF_BGP_1_A.csv
	MP_MPAv1_NewWF_BGP_1_A.csv	1301	Meta-Protein 438	Metagenome unknown	root	1	1	contig12799000073_4, contig5637000018_13	AQSMDALTSMSTVAGYK		MP_MPAv1_NewWF_BGP_1_A.csv
	MP_MPAv1_NewWF_BGP_1_A.csv	1302	Meta-Protein 439	Metagenome unknown	root	3	3	contig139691000004_2, contig787000044_24, contig347000032_2, contig3776000061_1, contig60571000038_1, contig3550000011_10	IVVNQPVYNMINR, IVVNQPVYNMLNRQPNVASALVGASRPEQIEANVK		MP_MPAv1_NewWF_BGP_1_A.csv
	MP_MPAv1_NewWF_BGP_1_A.csv	1303	Meta-Protein 440	Metagenome unknown	root	3	8	ATB_S_contig029321, contig550000009_1	AGDSVLDAVMLAGGLLESADAQR, AGGVLPTGDPSAIAITRFLADNLPLESGDVIIVPR		MP_MPAv1_NewWF_BGP_1_A.csv
	MP_MPAv1_NewWF_BGP_1_A.csv	1304	Meta-Protein 441	Metagenome unknown	root	2	1	contig105000006_1, contig139458000056_6, contig835000067_21	WLSDNSIEWAKWLSDNSLEWAK		MP_MPAv1_NewWF_BGP_1_A.csv
	MP_MPAv1_NewWF_BGP_1_A.csv	1305	Meta-Protein 442	Metagenome unknown	root	30	91	contig978000054_2, contig33766000006_2, ATB_G30_contig017752, contig62675000048_8, contig181000021_4, contig139204000057_78, contig389000067_40, contig271000026_2, contig458000018_20, contig59000022_16, contig90000001_13, contig139194000007_1, contig2677000076_1, contig139044000060_48	AFRDNAELLLGEDADK, DFPLYGAGDRTEDNLIK, DPNTGTVWAIEALLFQNK, DPNTGTVWAIEALLFQNKK, FLQIGEEGVHHIVHEDGAIEMLPVVGEK, HLLWPNYK, INTFVREDWLK, KINTFVREDWLK, KLNQWYNEGLIWK, LGLEEPRTLEEFENMLR, LNQWYNEGLIWK, NMVGEEAAFIAVECFPNDAGIYR, NMVGEEAAFIAVECFPNDAGIYRK, NNLLAQAIVAKPEEFDAVWDR, NNLLAQAIVAKVEEFDAVWDR, RNNLLAQAIVAKPEEFDAVWDR, SIALNYPGVEAK, SNPGGSPPEDNFFTDFIK, SNPGGSPPEDNFFTDFIKK, SNPGGSPPEDNFWTDFIK, SNPGGSPPED…		MP_MPAv1_NewWF_BGP_1_A.csv
	MP_MPAv1_NewWF_BGP_1_A.csv	1306	Meta-Protein 443	Metagenome unknown	root	2	4	contig139849000029_106, contig6496000033_7, ATB_G5_contig067392, contig2247000069_7	IAAEGLVTSYIHMGGRNEGKPEHIIDKIVEGR		MP_MPAv1_NewWF_BGP_1_A.csv
	MP_MPAv1_NewWF_BGP_1_A.csv	1307	Meta-Protein 444	Metagenome unknown	root	3	6	contig28668000013_1, contig19000024_15, contig250000068_5, contig43594000014_1, contig1718000017_2, contig203000004_4, contig129000003_4	KAYDYLGINPDSK, SIDPIFQQEVTVTRTFGAVMTTEVNCGQVR		MP_MPAv1_NewWF_BGP_1_A.csv
	MP_MPAv1_NewWF_BGP_1_A.csv	1308	Meta-Protein 445	Metagenome unknown	root	2	1	contig5675000067_15, contig452000062_1, contig109000068_29, contig139279000061_56	DMNVVSNASCTTNCLAPIAKDMNVVSNASCTTNCLAPLAK		MP_MPAv1_NewWF_BGP_1_A.csv
	MP_MPAv1_NewWF_BGP_1_A.csv	1309	Meta-Protein 446	Metagenome unknown	root	11	36	contig453000015_50, contig5821000075_2, contig331000053_3, contig379000031_5, contig69125000055_2, contig1125000057_3	AVYAMSDPEAIEAIELWK, DIDAYEDEYVEYFLPYVK, DMFVAAGLPTPNELQNEGK, GRLEKVEEAFNCK, IAGHSADGMREYFADGEGR, ILASIVAGDPVGDLIYVSNR, LDLYALPDHAR, LDPWPIEQEMAAYANGGGIMK, LWDNIPGLGNELNEALVK, NMDIGSAQGWIYNRSEMDAVAPVIQSLLDEAYNK		MP_MPAv1_NewWF_BGP_1_A.csv
	MP_MPAv1_NewWF_BGP_1_A.csv	1310	Meta-Protein 447	Metagenome unknown	root	2	3	contig139732000053_28, contig472000042_11, contig138306000031_18	FGQPETGLGITPGFGGTQRNLAETIAANAPIAVK		MP_MPAv1_NewWF_BGP_1_A.csv
	MP_MPAv1_NewWF_BGP_1_A.csv	1311	Meta-Protein 448	Metagenome unknown	root	1	1	contig139738000012_61, contig139849000004_48	VGQTTADNLFTLEATR		MP_MPAv1_NewWF_BGP_1_A.csv
	MP_MPAv1_NewWF_BGP_1_A.csv	1312	Meta-Protein 449	Metagenome unknown	root	1	1	contig138156000070_16, contig139722000026_54	YSPIGELGQFAK		MP_MPAv1_NewWF_BGP_1_A.csv
	MP_MPAv1_NewWF_BGP_1_A.csv	1313	Meta-Protein 450	Metagenome unknown	root	3	5	contig36320000065_2, contig27830000035_1, contig138650000063_17, contig139316000010_71, contig230000075_31, contig139400000021_83	IAEEEGFPEIAAVLR, NILTAFAGESQARNLLTAFAGESQAR		MP_MPAv1_NewWF_BGP_1_A.csv
	MP_MPAv1_NewWF_BGP_1_A.csv	1314	Meta-Protein 451	Metagenome unknown	root	30	49	contig27572000014_1, contig57539000017_1, contig1161000032_47, contig139207000010_3, contig139560000026_4, contig7477000068_11, contig4482000019_16, contig1270000035_6, contig15994000030_3, contig1542000010_2, contig1588000067_1, contig138467000024_15, contig158000031_16, contig956000067_2, contig32_19, contig1189000067_1, ATB_S_contig059731, contig10971000035_1, contig10583000038_1, contig736000…	AIASHALSIFGDHQDVMAVR, ALASHALSIFGDHQDVMAVR, AVFDNLALNEPK, EAANPYYLAVPK, FYGFGSDGTVGANQNSIK, FYGLGSDGTVGANQNSIK, FYNIDAVK, GTAQNPDIFFQNR, GTAQNPDIYFQGR, HFVEVLPESVKR, HVIEAMNQVGELTGR, IDVIDYEEMAK, IIGDHTDMYAQGYYEYDSKK, IQISPLDCTGCGNCAQVCPAKEK, IQVSPLDCTGCGSCANVCPSK, IVDYDAINEFR, IYDLLDGIK, KGEDIVNMNYQAVDR, LFNYYGHPEAER, LVDMDAIAAFR, LVDMEAVAAFR, LVDYDAINEFR, LVDYDALNEFR, SPIKAPYLVR, SVAAHALSIFGDHS…		MP_MPAv1_NewWF_BGP_1_A.csv
	MP_MPAv1_NewWF_BGP_1_A.csv	1315	Meta-Protein 452	Metagenome unknown	root	12	27	contig139211000057_1, contig3554000012_1, contig97000076_14, contig139569000068_23, contig138848000079_9, contig4231000079_6, contig295000058_97, contig139284000015_15, contig97000024_10, contig138834000076_3, contig139632000036_10, contig1864000048_4, contig25533000009_29	AAVDKGIAELVK, AVAGHALSIFGDHSDVMAAR, DTTPAQIFAVFNNLK, GTAQNPDILFQAK, IAGELLPGVFHVSAR, LVDMDAVNEFR, NAFYDKAEKPVIVGGR, SLEIPEVVNVSAPGTVR, SLFYNKEDAPVIVGGR, TKEPGSVGEPLYLDVK, TSHEIQKIETIDYADLAKVPFVNFFDGFR		MP_MPAv1_NewWF_BGP_1_A.csv
	MP_MPAv1_NewWF_BGP_1_A.csv	1316	Meta-Protein 453	Metagenome unknown	root	11	13	contig7609000019_20, contig2882000048_2, contig998000062_1, contig139810000023_7, contig3063000069_10, contig1030000018_15, contig96000008_4, contig1187000010_4, contig43000039_67, contig1268000071_21, contig126000010_51, contig1110000020_1	AIPIITEYLK, ITVLSVAPLFAEAIR, LIANLITAAGADR, LIANLLTAAGADR, LLANILTAAGADR, LLANLITAAGADR, LLANLLTAAGADR, LTVLSVAPLFAEAIR, NLQDVIVVSPDVGGVVR, NLQDVLVVSPDVGGVVRTAILLDDMIDTGGTIVNAAK		MP_MPAv1_NewWF_BGP_1_A.csv
	MP_MPAv1_NewWF_BGP_1_A.csv	1317	Meta-Protein 454	Metagenome unknown	root	1	3	contig380000069_7, contig4737000012_18, contig139215000040_66	LVSWYDNEWGYSNK		MP_MPAv1_NewWF_BGP_1_A.csv
	MP_MPAv1_NewWF_BGP_1_A.csv	1318	Meta-Protein 455	Metagenome unknown	root	12	41	contig28682000052_4, contig970000060_2, contig17486000019_4, contig139064000062_66, contig2751000032_4, contig139485000027_14, contig1450000078_2, contig138845000028_29, contig139674000036_170, contig1735000011_13	APFMIDGDWK, FTDPEFVNALEFYAQMYK, IDVTSDNIEPLVVER, IMNINYSEVNGLFASGR, LETAGTIPSRIDVTSDNIEPLVVER, LVGDEKLHEIIRGEAK, MTIFPAIPGEITK, MTIFPAIPGEITKK, STSLHTLGLVK, TANFLTDVTTGEALIPVDQQPNFK, VEAYAAADRLPDVVFMWPGGRVQEALEAWR		MP_MPAv1_NewWF_BGP_1_A.csv
	MP_MPAv1_NewWF_BGP_1_A.csv	1319	Meta-Protein 456	Metagenome unknown	root	2	6	contig139613000026_5, contig655000077_1, contig1730000015_4	AVLVLDQDNIIRLVSIVPSLDTGVCDAQTR		MP_MPAv1_NewWF_BGP_1_A.csv
	MP_MPAv1_NewWF_BGP_1_A.csv	1320	Meta-Protein 457	Metagenome unknown	root	1	1	contig139826000013_15, ATB_G30_contig075123	VAVVPGSAFGDSGEGFVR		MP_MPAv1_NewWF_BGP_1_A.csv
	MP_MPAv1_NewWF_BGP_1_A.csv	1321	Meta-Protein 1561	Metagenome unknown	root	1	2	contig8024000028_2	LGKIMLLK		MP_MPAv1_NewWF_BGP_1_A.csv
	MP_MPAv1_NewWF_BGP_1_A.csv	1322	Meta-Protein 458	Metagenome unknown	root	1	1	ATB_S_contig065182, contig2887000014_1	LSYDQAVEMLQK		MP_MPAv1_NewWF_BGP_1_A.csv
	MP_MPAv1_NewWF_BGP_1_A.csv	1323	Meta-Protein 459	Metagenome unknown	root	2	1	contig139613000026_15, contig76000075_5, contig139465000067_10	DSNQDILGFVHQVPERDSNQDLLGFVHQVPER		MP_MPAv1_NewWF_BGP_1_A.csv
	MP_MPAv1_NewWF_BGP_1_A.csv	1324	Meta-Protein 460	Metagenome unknown	root	1	1	contig120000075_40, ATB_S_contig077482	AAVEEGIIPGGGVAYIR		MP_MPAv1_NewWF_BGP_1_A.csv
	MP_MPAv1_NewWF_BGP_1_A.csv	1325	Meta-Protein 461	Metagenome unknown	root	1	2	contig911000009_1, contig1516000072_2, contig2447000071_1, contig995000010_5	SMAWELGPEIR		MP_MPAv1_NewWF_BGP_1_A.csv
	MP_MPAv1_NewWF_BGP_1_A.csv	1326	Meta-Protein 462	Metagenome unknown	root	15	30	contig138898000025_10, contig580000049_57, contig139244000058_53, Q60186, contig3967000044_57, contig139381000007_29, A7IAU8, Q2FP52, Q46FH3, Q8TIJ1, P22662, contig2186000015_9, contig139490000026_6, C3NGV1, contig14181000011_1, P48414, contig1575000045_1	DMGYDVSLMADSTSR, EASVYTGMTIAEYYR, EASVYTGMTLAEYYR, EIFLQQNAFHPIDTYSPFAK, GNEMADVLWEFPELEDPQTGRPLMER, GSITAIGAVSPPGGDFSEPVTQNTLR, ILDGLFPVAK, KGDHVNGGDVIGVVQETVNIEHK, LEEMPGEEGYPAYLSAR, TIIVANTSNMPVAAR, TILVANTSNMPVAAR, TLLVANTSNMPVAAR, VAGPVVTAIGLDAK, VGHEGLMGEVIQIVGDKVKFEEDFDGSLNAVLAK		MP_MPAv1_NewWF_BGP_1_A.csv
	MP_MPAv1_NewWF_BGP_1_A.csv	1327	Meta-Protein 1562	Metagenome unknown	root	1	2	contig18000034_3	EYKPDLFIAGPAFNAGR		MP_MPAv1_NewWF_BGP_1_A.csv
	MP_MPAv1_NewWF_BGP_1_A.csv	1328	Meta-Protein 463	Metagenome unknown	root	2	3	contig85550000060_1, contig10303000039_1, contig15149000061_17, contig57000009_12, contig139732000078_47, contig2661000045_1	KYEPDIFIAGPAFNAGRKYEPDLFIAGPAFNAGR		MP_MPAv1_NewWF_BGP_1_A.csv
	MP_MPAv1_NewWF_BGP_1_A.csv	1329	Meta-Protein 464	Metagenome unknown	root	1	2	contig484000063_2, contig952000017_1, contig93072000015_68, contig6218000049_11	YINVTAITPTPLGEGK		MP_MPAv1_NewWF_BGP_1_A.csv
	MP_MPAv1_NewWF_BGP_1_A.csv	1330	Meta-Protein 465	Metagenome unknown	root	3	7	contig3860000013_1, contig21974000069_4, contig1903000058_6	ILENVTADDYINSDLPDVDKEVIEAVFDSYK, IYGLAQNEALAAIDAKNAILSWNSVNPISPEEAYQELK		MP_MPAv1_NewWF_BGP_1_A.csv
	MP_MPAv1_NewWF_BGP_1_A.csv	1331	Meta-Protein 1563	Metagenome unknown	root	1	1	contig138628000052_34	IENYIEAMKVK		MP_MPAv1_NewWF_BGP_1_A.csv
	MP_MPAv1_NewWF_BGP_1_A.csv	1332	Meta-Protein 466	Metagenome unknown	root	22	65	contig611000059_2, contig7859000053_2, contig153000008_4, ATB_G30_contig076881, contig9413000014_1, contig116855000064_2, contig12340000028_1, contig37000000_13	AINTLVGLGVVTGYEDGTFKPER, ALGYTDDCNELKGMTWPTNFK, FVLNDDDEITAIVATK, GIVVGDGDGNFRPDAQVSYDEAITMIVR, GLVIGTGDGKFTPDR, GLVIGTGDGNFTPDR, IDGTASGDKAEVLGIVTTQQTK, INPAYNNAGDEVQAVVAFMEGAK, LASYDKGFNVTTATVDPK, LATQDDETIVFDVYAK, LIVEILGYGDLVAGSK, LIVEILGYGDLVSGAK, NGEIEMFFVK, QVSYDEAITMVVR, SNFADTQGHWADPWIALAAGR, TAATGWLPLAENATIVGVK, TQDSDKEDVLLLSR, TVSYDEAITMIVR, VAAQIFENGAIK, VFVNDDDEVVYVTK, VYLNDDDQVVYVKY…		MP_MPAv1_NewWF_BGP_1_A.csv
	MP_MPAv1_NewWF_BGP_1_A.csv	1333	Meta-Protein 467	Metagenome unknown	Thermoanaerobacter brockii	2	4	contig2973000029_3, P14941, contig139943000004_4, contig660000000_9, contig397000000_2	VVVPAITPDWRYYGATDIVNYK		MP_MPAv1_NewWF_BGP_1_A.csv
	MP_MPAv1_NewWF_BGP_1_A.csv	1334	Meta-Protein 468	Metagenome unknown	root	2	1	contig58584000022_4, Q1JCN8, contig2465000026_1, A4ISP4	SGETEDSTIADIAVATNAGQIKSGETEDSTIADLAVATNAGQIK		MP_MPAv1_NewWF_BGP_1_A.csv
	MP_MPAv1_NewWF_BGP_1_A.csv	1335	Meta-Protein 469	Metagenome unknown	root	56	179	contig1674000056_2, contig139708000053_11, contig757000075_2, contig20291000049_1, contig76000076_6, ATB_G5_contig016812, ATB_G5_contig048563, contig334000005_21, ATB_G30_contig027362, contig138928000072_12, ATB_G5_contig048561, contig335000066_4, contig1338000055_6, contig48037000079_1, contig138985000072_77, contig3088000022_9, contig144000068_3, ATB_S_contig066122, contig795000005_15, contig20…	AISPLMAEQIK, AYYQKLNEMYNK, DAGALIPLNDLIEEHAPNIK, DAGALIPLNDLIEEHAPNIKR, DAGALIPLNDLIEEHAPNLK, DAGALIPLNDLIEEHAPNLKR, DAGALLPLNDLIEEHAPNLK, DAGALLPLNDLIEEHAPNLKR, DAGMLIPLNDLVEK, DIKPLMVEQMK, DNPDSIFVPLPIVIDPLVEER, DNPDSILVPIPIVIDTLVEER, DNPESIFVPLPIVIDPLVEER, DVFGGPYFYNSFPNLR, EFTVFTGEPLPDYPGSTIVGDIIEAESGVR, EFTVFTGEPLPDYPGSTIVGDIIER, FIDYLLK, FLDYLIK, FLDYLIKEDTQR, FLDYLIR, FLDYLIREDTQR, FLDYLLK…		MP_MPAv1_NewWF_BGP_1_A.csv
	MP_MPAv1_NewWF_BGP_1_A.csv	1336	Meta-Protein 470	MTRB_METBF Tetrahydromethanopterin S-methyltransferase subunit B OS=Methanosarcina barkeri (strain Fusaro / DSM 804) GN=mtrB PE=3 SV=1	Methanosarcina	1	1	Q9Y8K3, P80655	DSIQYSMEPVFER		MP_MPAv1_NewWF_BGP_1_A.csv
	MP_MPAv1_NewWF_BGP_1_A.csv	1337	Meta-Protein 471	Metagenome unknown	root	5	5	contig48000063_27, contig138788000079_1, contig3683000030_2, contig40855000057_1, contig138621000032_26, contig4260000039_10, Q8J1H3, Q1DTF9, Q01982, contig5360000005_1, contig938000078_3	IVAWYDNEWGYSNK, LVAWYDNEWGYSNK, VISNASCTTNCLAPIAK, VISNASCTTNCLAPLAKVLSNASCTTNCLAPLAK		MP_MPAv1_NewWF_BGP_1_A.csv
	MP_MPAv1_NewWF_BGP_1_A.csv	1338	Meta-Protein 1564	Metagenome unknown	root	1	1	contig269000023_6	TNTILQSAFFK		MP_MPAv1_NewWF_BGP_1_A.csv
	MP_MPAv1_NewWF_BGP_1_A.csv	1339	Meta-Protein 472	Metagenome unknown	root	1	2	contig23049000030_28, contig139665000012_33, contig6846000012_6, contig1532000061_30	YPGGNFVSGYNWEDGVGPK		MP_MPAv1_NewWF_BGP_1_A.csv
	MP_MPAv1_NewWF_BGP_1_A.csv	1340	Meta-Protein 473	Metagenome unknown	root	1	1	contig139067000060_26, contig339000077_2	VLSWYDNEWGYAQK		MP_MPAv1_NewWF_BGP_1_A.csv
	MP_MPAv1_NewWF_BGP_1_A.csv	1341	Meta-Protein 474	PSBA_AETCO Photosystem II protein D1 OS=Aethionema cordifolium GN=psbA PE=3 SV=1	root	4	3	A4QJ96, A4QKH2, P24625, A5GTY4, Q1KVU8, Q09MJ8, B1XM24, P09752, A0A315, O98733, B1XIP3	VINTWADIINR, VINTWADILNR, VLNTWADIINRVLNTWADILNR		MP_MPAv1_NewWF_BGP_1_A.csv
	MP_MPAv1_NewWF_BGP_1_A.csv	1342	Meta-Protein 475	Metagenome unknown	root	2	1	contig3937000039_17, contig138481000043_17, contig13344000024_2, A5VLI9	NIYAQIIDDVKNIYAQLIDDVK		MP_MPAv1_NewWF_BGP_1_A.csv
	MP_MPAv1_NewWF_BGP_1_A.csv	1343	Meta-Protein 476	Metagenome unknown	root	1	2	contig2043000038_1, contig139636000012_80, contig976000047_9	TLPGAVFVVDPR		MP_MPAv1_NewWF_BGP_1_A.csv
	MP_MPAv1_NewWF_BGP_1_A.csv	1344	Meta-Protein 477	Metagenome unknown	root	1	3	contig20000029_2, contig49865000041_1, contig69000010_2, contig17000004_24	LIPACDISEQISLASK		MP_MPAv1_NewWF_BGP_1_A.csv
	MP_MPAv1_NewWF_BGP_1_A.csv	1345	Meta-Protein 478	Metagenome unknown	Methanosarcina	2	2	contig1093000045_1, Q8TS72, P58970, contig10211000053_7	AGANVFGPVVNTNTSKELREELDIGVITSVPGAAK		MP_MPAv1_NewWF_BGP_1_A.csv
	MP_MPAv1_NewWF_BGP_1_A.csv	1346	Meta-Protein 479	Metagenome unknown	root	1	1	contig26929000071_1, contig21271000067_1	LGLVTPYVEYETGYK		MP_MPAv1_NewWF_BGP_1_A.csv
	MP_MPAv1_NewWF_BGP_1_A.csv	1347	Meta-Protein 480	Metagenome unknown	Thermoanaerobacter tengcongensis MB4	1	1	contig139313000000_18, Q8R751	VIEGQNGLFIAMPSR		MP_MPAv1_NewWF_BGP_1_A.csv
	MP_MPAv1_NewWF_BGP_1_A.csv	1348	Meta-Protein 481	RL16_PAEAT 50S ribosomal protein L16 OS=Paenarthrobacter aurescens (strain TC1) GN=rplP PE=3 SV=1	root	1	1	A1R8T8, contig326000018_9	VLFELSGVNEEVAR		MP_MPAv1_NewWF_BGP_1_A.csv
	MP_MPAv1_NewWF_BGP_1_A.csv	1349	Meta-Protein 482	Metagenome unknown	root	2	1	contig37246000037_1, contig4736000045_10, contig59456000066_3	FVIIDGNPHAGDFVPVVKFVILDGNPHAGDFVPVVK		MP_MPAv1_NewWF_BGP_1_A.csv
	MP_MPAv1_NewWF_BGP_1_A.csv	1350	Meta-Protein 483	Metagenome unknown	root	1	1	contig119031000057_5, contig138608000052_5	LFETDPSGTLLEYK		MP_MPAv1_NewWF_BGP_1_A.csv
	MP_MPAv1_NewWF_BGP_1_A.csv	1351	Meta-Protein 484	Metagenome unknown	root	2	3	contig27000029_8, contig6938000032_1, contig9325000010_18, contig139049000039_12, contig6840000076_1, contig138981000071_36, contig784000022_5	VQIVGDDLFVTNTERVQLVGDDLFVTNTER		MP_MPAv1_NewWF_BGP_1_A.csv
	MP_MPAv1_NewWF_BGP_1_A.csv	1352	Meta-Protein 485	Metagenome unknown	root	1	4	contig138594000042_33, contig48000063_108, contig26985000003_11, contig139045000045_2, contig139600000012_16, contig139775000046_2	FGDPENPLLVSVR		MP_MPAv1_NewWF_BGP_1_A.csv
	MP_MPAv1_NewWF_BGP_1_A.csv	1353	Meta-Protein 486	Metagenome unknown	root	2	4	ATB_G30_contig085662, contig75000056_18, ATB_G5_contig039312	NTDLQGFFASPLGYKWSDGSDLTAHDFVYAWNR		MP_MPAv1_NewWF_BGP_1_A.csv
	MP_MPAv1_NewWF_BGP_1_A.csv	1354	Meta-Protein 487	Metagenome unknown	root	1	1	contig139233000058_6, contig703000030_1	QPLFEFSGACAGCGETAYIK		MP_MPAv1_NewWF_BGP_1_A.csv
	MP_MPAv1_NewWF_BGP_1_A.csv	1355	Meta-Protein 488	Metagenome unknown	root	5	7	contig5784000054_3, contig1439000068_1, contig125635000012_2, contig1832000062_1	ELGQSGMVGFDAIFNNIEK, MSYEYLIDSPFVK, VAEIGYTGIEAAGYADGKFYGLEPK, YIIVEVEKYDYAPLESIKYLVVPWIPTPK		MP_MPAv1_NewWF_BGP_1_A.csv
	MP_MPAv1_NewWF_BGP_1_A.csv	1356	Meta-Protein 489	Metagenome unknown	root	1	2	contig491000045_22, contig172000055_2, contig9284000012_1	APFDTLADTLR		MP_MPAv1_NewWF_BGP_1_A.csv
	MP_MPAv1_NewWF_BGP_1_A.csv	1357	Meta-Protein 490	Metagenome unknown	root	8	11	contig1774000054_2, ATB_S_contig159022, contig1509000077_2, contig932000074_4, contig163000033_55	HGGIEHVIIDFAQEDLEK, HGGIEHVLIDFAQEDLEK, LDLTEEDGRLIVPVAAVIPAR, LGDLVALEDTDNRFGR, LIVPVAAVIPAR, MAIEDKVLIK, NQAYNTLACVGNEAVVISGDAKTAYGVDREGVPFVLPGTGGITYNVK		MP_MPAv1_NewWF_BGP_1_A.csv
	MP_MPAv1_NewWF_BGP_1_A.csv	1358	Meta-Protein 491	Metagenome unknown	root	2	5	contig138776000006_30, contig118000045_1, contig180000002_5	APETWDELVEMAIHLRVGNYLIDEYLR		MP_MPAv1_NewWF_BGP_1_A.csv
	MP_MPAv1_NewWF_BGP_1_A.csv	1359	Meta-Protein 492	PSA_METM7 Proteasome subunit alpha OS=Methanococcus maripaludis (strain C7 / ATCC BAA-1331) GN=psmA PE=3 SV=1	root	9	17	A6VIP0, Q59565, Q469M6, contig139560000068_23, Q60177, contig95000008_74, Q8TPX5, ATB_B_contig022462, Q6M0L9, contig139442000056_10, Q97BZ8, Q6L0W3, contig18000065_34, Q8PTU1	AADGVVLLVDKR, IFQIDDHIGAATSGLVADAR, IFQIDDHVAAATSGLVADAR, KLVPEEVENYVQQILAK, LFETDPSGALIEYK, LFETDPSGALLEYK, LFQVEYAR, LVPEEVENYVQQILAKVSYDEPIGVEVISK		MP_MPAv1_NewWF_BGP_1_A.csv
	MP_MPAv1_NewWF_BGP_1_A.csv	1360	Meta-Protein 493	Metagenome unknown	root	6	16	contig6442000026_3, contig5333000040_5	AEEMYPFLADVK, AEEMYPFLADVKK, AFALIQEVVAEG, AMAVEEFIPYIK, AMAVEEFIPYIKNELGKTVDYAAYAIVDGAPLDTK		MP_MPAv1_NewWF_BGP_1_A.csv
	MP_MPAv1_NewWF_BGP_1_A.csv	1361	Meta-Protein 494	Metagenome unknown	root	1	1	contig249000024_31, contig139486000067_36	YIDVTAITPTPLGEGK		MP_MPAv1_NewWF_BGP_1_A.csv
	MP_MPAv1_NewWF_BGP_1_A.csv	1362	Meta-Protein 495	Metagenome unknown	root	4	5	contig125914000054_2, contig224000051_2, contig2424000055_10, contig7217000008_262, contig139242000022_5, contig140010000023_7, contig3596000023_18, contig12000049_101, contig26000005_79, contig172000063_28, contig29443000043_3	AVALVIPELK, AVALVLPELK, GLMNTIHSYTNDQRGLMTTVHSFTNDQR		MP_MPAv1_NewWF_BGP_1_A.csv
	MP_MPAv1_NewWF_BGP_1_A.csv	1363	Meta-Protein 496	Metagenome unknown	root	2	1	contig810000022_6, contig427000011_8	IAMVPQAAMNSLNPVIRIAMVPQAAMNSLNPVLR		MP_MPAv1_NewWF_BGP_1_A.csv
	MP_MPAv1_NewWF_BGP_1_A.csv	1364	Meta-Protein 497	Metagenome unknown	root	1	2	contig2714000045_3, contig139613000075_18, contig6749000072_1, contig4407000029_3	DAGTIAGLEVLR		MP_MPAv1_NewWF_BGP_1_A.csv
	MP_MPAv1_NewWF_BGP_1_A.csv	1365	Meta-Protein 498	Metagenome unknown	root	4	4	contig2482000069_30, contig139045000003_29, contig1080000036_3, contig138987000071_35, contig936000078_25	DDGLVGFIEAADDNFLGR, LDTPIGLLR, LDTPLGIIRLDTPLGLLR		MP_MPAv1_NewWF_BGP_1_A.csv
	MP_MPAv1_NewWF_BGP_1_A.csv	1366	Meta-Protein 499	Metagenome unknown	root	1	1	contig10746000062_1, ATB_G30_contig048452	FTSETGVGMLDPWK		MP_MPAv1_NewWF_BGP_1_A.csv
	MP_MPAv1_NewWF_BGP_1_A.csv	1367	Meta-Protein 500	Metagenome unknown	root	13	43	contig5080000061_1, contig139074000060_13, contig4033000034_2, P00361, contig138924000076_51, contig139564000048_16, contig364000077_9, contig139349000010_11, contig139083000073_7, contig1922000002_3, ATB_B_contig028833, contig10985000008_3, contig51000047_58, contig139707000053_33, contig52865000064_2, contig4298000047_3, contig1390000011_2, contig4385000026_4, ATB_S_contig016813, contig13874300…	GALDDPNFDVVAINDLTDAK, GAVADPNFEIVAVNDLTDAK, GILAFEEEPLVSTDFMGNDNSSIVDAALTK, GLMTTVHAYTNDQR, GSELSSIVDGLSTMVIEDDLVK, ILDLPHKDLR, KGLMTTVHAYTNDQR, LKGILAFEEEPLVSTDFMGNDNSSIVDAALTK, LLDLPHKDLR, NIPWGELGVEYVVESTGVFR, VMDLVDYIAAK, VPVSTVSVVDLVVETEKPVTAEAANAELKKVVAWYDNEWGYSMR		MP_MPAv1_NewWF_BGP_1_A.csv
	MP_MPAv1_NewWF_BGP_1_A.csv	1368	Meta-Protein 501	G3P_LACDT Glyceraldehyde-3-phosphate dehydrogenase (Fragment) OS=Lactarius deterrimus GN=GPD PE=3 SV=1	Agaricomycetes	1	2	P55070, Q8TFJ2	FGIVEGLMSTIHATTATQK		MP_MPAv1_NewWF_BGP_1_A.csv
	MP_MPAv1_NewWF_BGP_1_A.csv	1369	Meta-Protein 502	Metagenome unknown	root	6	11	contig139862000013_49, contig73000053_2, contig5663000054_15	ALELMTELVGAGPR, IPGTADYIESLDIHLSEALSGQVSAQEALDR, KLDRPNFVANESGASWSPVISK, LTGATYEVAEIPFGEFQAK, TWQELLDVAKYNNVFWFDPETMEPLINSPGHVR		MP_MPAv1_NewWF_BGP_1_A.csv
	MP_MPAv1_NewWF_BGP_1_A.csv	1370	Meta-Protein 1565	DNAK_XANCB Chaperone protein DnaK OS=Xanthomonas campestris pv. campestris (strain B100) GN=dnaK PE=3 SV=1	Xanthomonas campestris pv. campestris str. B100	1	1	B0RVU2	VTEAVITVPAYFNDSQR		MP_MPAv1_NewWF_BGP_1_A.csv
	MP_MPAv1_NewWF_BGP_1_A.csv	1371	Meta-Protein 1566	DNAK_DEIDV Chaperone protein DnaK OS=Deinococcus deserti (strain VCD115 / DSM 17065 / LMG 22923) GN=dnaK PE=3 SV=1	Deinococcus deserti VCD115	1	1	C1CZH9	ITDAVITVPAYFDNSQR		MP_MPAv1_NewWF_BGP_1_A.csv
	MP_MPAv1_NewWF_BGP_1_A.csv	1372	Meta-Protein 503	Metagenome unknown	root	3	2	contig3598000044_2, contig139568000026_26, contig779000036_4, contig115000052_37	DIIILVPEEQGVHIR, IAHATQGGDKACSYGCLGYGSCVKLAHATQGGDKACSYGCLGYGSCVK		MP_MPAv1_NewWF_BGP_1_A.csv
	MP_MPAv1_NewWF_BGP_1_A.csv	1373	Meta-Protein 504	Metagenome unknown	root	1	1	contig139636000012_32, contig51180000037_1	GYLTVFEDGTFQGTR		MP_MPAv1_NewWF_BGP_1_A.csv
	MP_MPAv1_NewWF_BGP_1_A.csv	1374	Meta-Protein 505	EFTU_STRA1 Elongation factor Tu OS=Streptococcus agalactiae serotype Ia (strain ATCC 27591 / A909 / CDC SS700) GN=tuf PE=3 SV=1	Streptococcus	2	1	Q3K1U4, Q8E0H1, Q5M101, P72483	QLDEGIAGDNVGVLLRQLDEGLAGDNVGVLLR		MP_MPAv1_NewWF_BGP_1_A.csv
	MP_MPAv1_NewWF_BGP_1_A.csv	1375	Meta-Protein 506	Metagenome unknown	root	18	61	contig139173000040_6, contig65416000048_2, contig39000067_6, contig111000054_8, contig139957000046_2, contig333000070_2, contig342000007_12	DLYSQISGWDADLIVPLGER, DLYSVINGWDADLIVPLGQR, EDWQHSTVGVVTGK, FGVTIWGNDLR, GEPFVINMTYLAETEAQAGR, GIAFQMAKEPYNNPDFR, GLAFQMAKEPYNNPDFR, IDDYTVLIK, IVPEHIYSKVEDVTQFK, NPNISAWYKDFPYATSDDPCSK, QMAMINNEVDILCEVTPEMLEVMMAR, REDWQHSTVGVVTGK, SQGYDIPDDEEALIDMFGIGCWK, SYELGMEFMK, VAIADLPFIGFHSGIK, VEDVTQFKDSNPVVAGPYTVK, VHPDSDRSYELGMEFMKYAPEAAEKLFIK		MP_MPAv1_NewWF_BGP_1_A.csv
	MP_MPAv1_NewWF_BGP_1_A.csv	1376	Meta-Protein 1567	Metagenome unknown	root	1	1	contig1964000074_3	VILEDGMSTDINGPESVYITTK		MP_MPAv1_NewWF_BGP_1_A.csv
	MP_MPAv1_NewWF_BGP_1_A.csv	1377	Meta-Protein 1568	Metagenome unknown	root	1	1	contig11936000068_4	VFLDVGPDFAYLTIPGK		MP_MPAv1_NewWF_BGP_1_A.csv
	MP_MPAv1_NewWF_BGP_1_A.csv	1378	Meta-Protein 507	Metagenome unknown	root	1	1	contig402000068_1, contig402000068_6	NPELAWEFIK		MP_MPAv1_NewWF_BGP_1_A.csv
	MP_MPAv1_NewWF_BGP_1_A.csv	1379	Meta-Protein 508	Metagenome unknown	root	1	2	contig139868000029_15, contig139901000046_19	GYLQEDANIGDEVTVLTR		MP_MPAv1_NewWF_BGP_1_A.csv
	MP_MPAv1_NewWF_BGP_1_A.csv	1380	Meta-Protein 509	Metagenome unknown	root	16	48	contig1030000018_34, contig138935000039_3, contig139443000030_52, contig126000010_69, contig139418000048_3, contig1244000009_3, contig53877000079_1, contig13474000013_5, contig1268000071_3, contig313000030_16, contig139655000014_74	AIIDYWNEQLQER, DGSLFTGASALIQEIGGVK, IATLVDELR, ILDADFPTLMANVTR, ITNYNAFLIPVTAEVPEHPQVR, LATIVDEIR, LATLVDEIR, LVADTGIMLR, LVVEDGQIVEYESELLPVTADIPK, NVEGLVFHEPISVAK, NVVGLVFHDPIAVAK, TQETNLGNLIADIIR, TSETNLGNLVADVIR, VGIIGLVAEETPIVTHPK, VGIMGLVAQETPMVTHPKVQAVIDRWNEQVEHR		MP_MPAv1_NewWF_BGP_1_A.csv
	MP_MPAv1_NewWF_BGP_1_A.csv	1381	Meta-Protein 510	Metagenome unknown	root	3	2	contig723000050_5, contig3494000057_3, O32755, contig139857000004_46, P0DB18, contig47000050_133, contig5000071_22, contig479000016_3	AIGLVIPELNGK, AIGLVLPELNGKALGLVLPELNGK		MP_MPAv1_NewWF_BGP_1_A.csv
	MP_MPAv1_NewWF_BGP_1_A.csv	1382	Meta-Protein 511	Metagenome unknown	root	2	4	contig2069000013_1, contig614000062_1	GIDIGYYPSPRIANSEGIIYGPDHVLGQGTTELFR		MP_MPAv1_NewWF_BGP_1_A.csv
	MP_MPAv1_NewWF_BGP_1_A.csv	1383	Meta-Protein 1569	Metagenome unknown	root	1	1	contig147000051_1	ILDIEHLLER		MP_MPAv1_NewWF_BGP_1_A.csv
	MP_MPAv1_NewWF_BGP_1_A.csv	1384	Meta-Protein 1570	Metagenome unknown	root	1	1	contig20169000016_108	CGVGGSAKDGEILIQGDIR		MP_MPAv1_NewWF_BGP_1_A.csv
	MP_MPAv1_NewWF_BGP_1_A.csv	1385	Meta-Protein 512	Metagenome unknown	root	3	2	contig410000051_23, contig5526000033_2, contig5246000045_2, contig2527000001_1, contig361000035_5, contig285000041_87, contig4273000031_13, contig213000079_3, contig139727000029_6, contig2653000072_5, contig139789000029_12	VNAIAPGFFITEQNR, VNAIAPGFFLTEQNRVNALAPGFFLTEQNR		MP_MPAv1_NewWF_BGP_1_A.csv
	MP_MPAv1_NewWF_BGP_1_A.csv	1386	Meta-Protein 513	EFTU_LACP7 Elongation factor Tu OS=Lachnoclostridium phytofermentans (strain ATCC 700394 / DSM 18823 / ISDg) GN=tuf PE=3 SV=1	root	7	12	A9KRZ4, contig138565000018_28, contig379000021_28, P18906, contig925000046_38, contig221000012_1, contig516000056_4, contig906000032_33, contig124958000023_1, contig1017000024_1, contig147000007_1, contig15810000034_1, contig501000052_17, contig11410000013_4, contig138471000005_14	ESDKPFLMPVEDVFSITGR, GITISTSHVEYETNNR, ILDEAQAGDNIGALLR, LLDEAQAGDNIGALLR, VSEEVEIVGIRDENRK, VVVTGIEMFRVVVTGIEMFRK		MP_MPAv1_NewWF_BGP_1_A.csv
	MP_MPAv1_NewWF_BGP_1_A.csv	1387	Meta-Protein 514	Metagenome unknown	root	1	2	contig331000013_19, contig139390000027_4, contig2321000014_3	FGLLINEMVK		MP_MPAv1_NewWF_BGP_1_A.csv
	MP_MPAv1_NewWF_BGP_1_A.csv	1388	Meta-Protein 515	Metagenome unknown	root	1	2	contig480000075_26, contig5033000049_2, contig9964000041_6	VQLVGFGTFEVR		MP_MPAv1_NewWF_BGP_1_A.csv
	MP_MPAv1_NewWF_BGP_1_A.csv	1389	Meta-Protein 516	Metagenome unknown	root	4	8	contig13474000013_51, ATB_S_contig041352, contig349000044_2, contig126000010_23, contig139737000014_10	ANVPLIFER, ELAPFLPGPVVEK, STLDQFIEVMRTFSTPHGGGGPGAGPIVVSK		MP_MPAv1_NewWF_BGP_1_A.csv
	MP_MPAv1_NewWF_BGP_1_A.csv	1390	Meta-Protein 517	Metagenome unknown	root	4	6	ATB_B_contig024492, contig139074000039_40, contig139252000057_13	GWWQEDLAPYGIEK, RVDAVFLPHPSPTVVER, SLTREDIFDTSFYEKVLGMTPGDAVTAISAK		MP_MPAv1_NewWF_BGP_1_A.csv
	MP_MPAv1_NewWF_BGP_1_A.csv	1391	Meta-Protein 518	PSBC_ATRBE Photosystem II CP43 reaction center protein OS=Atropa belladonna GN=psbC PE=3 SV=1	Viridiplantae	1	3	Q8S8X7, Q2VEI0, Q68S10, Q08684, Q8HB52, Q09MI2	DQETTGFAWWAGNAR		MP_MPAv1_NewWF_BGP_1_A.csv
	MP_MPAv1_NewWF_BGP_1_A.csv	1392	Meta-Protein 519	Metagenome unknown	root	3	5	contig420000067_8, contig88000049_24, contig138924000076_38, contig1520000022_2, ATB_S_contig060733	GIFELMDIQK, GTGEGWITAEYSMLPRSASITGAFIALSDALR		MP_MPAv1_NewWF_BGP_1_A.csv
	MP_MPAv1_NewWF_BGP_1_A.csv	1393	Meta-Protein 1571	Metagenome unknown	root	1	1	contig10000048_8	NVLIFFSQWRDIFMDPIK		MP_MPAv1_NewWF_BGP_1_A.csv
	MP_MPAv1_NewWF_BGP_1_A.csv	1394	Meta-Protein 520	Metagenome unknown	root	6	19	contig139430000067_14, contig2382000057_24, contig5000076_3, contig3823000052_1	FENFTQADYDAIYAK, FGYGFVQGAEYAAHEIGLTDPVQVK, LGFMGGMAVPAVVR, SFNQGAWEGVEAYAK, YTYVGNFNATPENQAKYYQPAEQSDTAYLDSIALAVK		MP_MPAv1_NewWF_BGP_1_A.csv
	MP_MPAv1_NewWF_BGP_1_A.csv	1395	Meta-Protein 521	Metagenome unknown	root	2	2	contig10211000053_4, P58983, contig139445000030_13	GYTAGMEEVGEQFEQGSLFLPHVIAAAEAMKTMVGGAPVTQDWADKIGADIYGESANDAVAK		MP_MPAv1_NewWF_BGP_1_A.csv
	MP_MPAv1_NewWF_BGP_1_A.csv	1396	Meta-Protein 522	Metagenome unknown	root	1	4	contig73000040_1, ATB_B_contig072281, contig2322000033_1	ISNLGLNDETIDITFK		MP_MPAv1_NewWF_BGP_1_A.csv
	MP_MPAv1_NewWF_BGP_1_A.csv	1397	Meta-Protein 523	Metagenome unknown	root	1	2	contig138924000076_145, contig5287000052_16, contig20784000045_9	VMTDPIADMLTR		MP_MPAv1_NewWF_BGP_1_A.csv
	MP_MPAv1_NewWF_BGP_1_A.csv	1398	Meta-Protein 524	Metagenome unknown	root	1	1	contig5475000023_28, contig7485000031_37	MVTDPIADMLTR		MP_MPAv1_NewWF_BGP_1_A.csv
	MP_MPAv1_NewWF_BGP_1_A.csv	1399	Meta-Protein 525	Metagenome unknown	root	1	2	contig38562000003_2, contig4133000025_1	ISTVGDAIAYIEQHAK		MP_MPAv1_NewWF_BGP_1_A.csv
	MP_MPAv1_NewWF_BGP_1_A.csv	1400	Meta-Protein 526	Metagenome unknown	root	10	47	contig234000038_17, contig139443000030_36, contig3063000069_17, contig633000077_15, contig139847000013_45, contig5800000070_3, contig126000010_58, contig492000079_1, contig139738000012_13, contig4640000017_9, contig2863000061_1, contig1019000053_1, contig3561000022_5, contig13474000013_16, contig330000022_20, contig8446000073_6, contig139234000010_8, contig74000058_1, contig248000073_3, contig505…	AAGDAVEAVFAAISEALAK, AAGDAVEAVFAAISEALAKEEK, AAGDAVEAVFAAISEALAREEK, GVNPSTGEEIMIPATK, KGVNPATKEEIMIPATK, KGVNPSTGEEIMIPATK, MNKAELIANVADKSGMTK, MNKAELIASVAEK, VTIVGFGTFEVRVTLVGFGTFEVR		MP_MPAv1_NewWF_BGP_1_A.csv
	MP_MPAv1_NewWF_BGP_1_A.csv	1401	Meta-Protein 527	Metagenome unknown	root	20	53	contig139213000057_23, contig139371000048_4, contig1407000076_1, contig12322000047_1, contig1448000059_1, contig139212000073_35, contig139849000029_294, contig4073000070_36, contig139674000036_3, contig703000031_6, contig138845000028_195, contig139508000027_7, contig1286000030_4, contig139543000030_66, contig6250000034_1, contig436000008_4	AIVKDSAGTLFPDDPVQQLR, CCVAGCSAALIDEERK, DDAGTFLPEYVEK, DGVQVFPEVMIPLIGTPQELK, DSAGTLFPDDPVQQLR, EGVKVFPEVMIPLVGTVQELK, GILEKDPFQSLDQVGVGSLVQMGVEK, GMPEVYAELER, IESLEEINPMLGHR, KREDEGVEQDNELSVEALK, LAADMGLAVEELK, LAADMGLAVEELKAR, LGVTYPEIYAMQAR, LLDPPLHEFVPQDAEIIR, NETSPEDIGGMDVAEGILTAR, NETSPEDIGGMHVAEGILTAR, TPLPIAELKK, VEPEQLDQLLHPMIDPK, VFPEVMIPLVGTVQELKVSMPGMMDTVLNLGLNDTTVEALAK		MP_MPAv1_NewWF_BGP_1_A.csv
	MP_MPAv1_NewWF_BGP_1_A.csv	1402	Meta-Protein 528	Metagenome unknown	root	1	1	contig4629000064_2, contig23112000043_1	TDDYTVIFELK		MP_MPAv1_NewWF_BGP_1_A.csv
	MP_MPAv1_NewWF_BGP_1_A.csv	1403	Meta-Protein 529	Metagenome unknown	root	2	2	contig734000033_9, contig764000060_2, contig139312000069_6, contig994000021_6	LIELGAPDIIVRLLELGAPDIIVR		MP_MPAv1_NewWF_BGP_1_A.csv
	MP_MPAv1_NewWF_BGP_1_A.csv	1404	Meta-Protein 530	Metagenome unknown	root	2	2	contig403000014_4, contig260000016_4, contig1080000058_1	FIEFLTTPEMAARVAPPHSTWASTPPDFVAGR		MP_MPAv1_NewWF_BGP_1_A.csv
	MP_MPAv1_NewWF_BGP_1_A.csv	1405	Meta-Protein 531	RRBR2_CLOAB Reverse rubrerythrin-2 OS=Clostridium acetobutylicum (strain ATCC 824 / DSM 792 / JCM 1419 / LMG 5710 / VKM B-1787) GN=rbr3B PE=1 SV=1	root	1	1	Q97D83, contig138905000025_40	FAELLGEVVVADTK		MP_MPAv1_NewWF_BGP_1_A.csv
	MP_MPAv1_NewWF_BGP_1_A.csv	1406	Meta-Protein 532	Metagenome unknown	Methanobacteriales	3	5	contig218000021_94, P11562, P12973, contig7312000005_42, contig124000057_45, O27233	ELIETEFFDPAR, ELLETEFFDPARLDEDGMMFDMLR		MP_MPAv1_NewWF_BGP_1_A.csv
	MP_MPAv1_NewWF_BGP_1_A.csv	1407	Meta-Protein 533	Metagenome unknown	root	5	4	contig35000079_1, contig59000078_1, contig11839000018_1, contig22457000078_3, contig4561000022_1, contig19792000039_1, contig619000068_9, contig90000061_1, contig1105000052_1	ILDYAQAGDNIGTLLR, LITPIAIEEGIR, LITPIAIEEGLR, LITPIALEEGLRLLDYAQAGDNIGTLLR		MP_MPAv1_NewWF_BGP_1_A.csv
	MP_MPAv1_NewWF_BGP_1_A.csv	1408	Meta-Protein 534	Metagenome unknown	root	2	1	contig403000079_2, contig304000075_1	ALSIADTSDFGILRALSLADTSDFGILR		MP_MPAv1_NewWF_BGP_1_A.csv
	MP_MPAv1_NewWF_BGP_1_A.csv	1409	Meta-Protein 535	Metagenome unknown	root	2	2	contig95525000042_1, contig12939000026_3, ATB_B_contig057713	NAIKNQIQTYVSKSITDAELESWLR		MP_MPAv1_NewWF_BGP_1_A.csv
	MP_MPAv1_NewWF_BGP_1_A.csv	1410	Meta-Protein 536	Metagenome unknown	root	2	4	contig13473000005_6, contig97185000019_1, contig71481000003_3, contig108959000006_1, contig24688000032_1	AEFDLAYQLEQERFAAIFPAATLVK		MP_MPAv1_NewWF_BGP_1_A.csv
	MP_MPAv1_NewWF_BGP_1_A.csv	1411	Meta-Protein 537	Metagenome unknown	root	5	5	contig139514000027_6, contig858000077_4, contig139000000003_15, contig316000075_4, contig139674000036_76, contig139806000041_25, contig52000057_21, contig13999000018_3, contig644000073_8, ATB_S_contig104172, contig839000070_8	GLTGFYFDDQR, MIIKDVVLSK, MLIKDVVLSK, YGVTQAILDAVARYGVTQALLDAVAR		MP_MPAv1_NewWF_BGP_1_A.csv
	MP_MPAv1_NewWF_BGP_1_A.csv	1412	Meta-Protein 538	Metagenome unknown	root	1	2	contig15723000070_89, contig2550000031_11, contig206000064_4	EMQIIFQDPYGSLNPR		MP_MPAv1_NewWF_BGP_1_A.csv
	MP_MPAv1_NewWF_BGP_1_A.csv	1413	Meta-Protein 539	Metagenome unknown	root	2	5	contig46933000043_2, contig1896000019_8, contig52890000014_1	SFLTLMDFTPEEIRYLLDLAADLK		MP_MPAv1_NewWF_BGP_1_A.csv
	MP_MPAv1_NewWF_BGP_1_A.csv	1414	Meta-Protein 540	Metagenome unknown	root	2	2	ATB_B_contig004411, contig1884000067_4	AAAGDIVILDQLTVEAPKSVGLNVYDILNSEK		MP_MPAv1_NewWF_BGP_1_A.csv
	MP_MPAv1_NewWF_BGP_1_A.csv	1415	Meta-Protein 541	Metagenome unknown	root	1	2	contig428000071_6, contig89494000037_8	TFGDEVSAVVFGK		MP_MPAv1_NewWF_BGP_1_A.csv
	MP_MPAv1_NewWF_BGP_1_A.csv	1416	Meta-Protein 542	Metagenome unknown	root	1	1	contig334000057_49, contig563000031_5	MLIADEPVSMLDASVR		MP_MPAv1_NewWF_BGP_1_A.csv
	MP_MPAv1_NewWF_BGP_1_A.csv	1417	Meta-Protein 543	Metagenome unknown	root	18	62	contig2102000007_4, contig29474000044_2, contig938000040_6, contig575000043_2	AFLTGDDPILTGGMGDTIAAGVSGTWNAEAIKEK, ANIPLAALAEQSK, ANLPLAALAEQSK, ANPEKEYDITLAVVSEADAK, DVLGSYWAPAEAFGTAMEAK, LGDNFAATKLPTFTAGSEQIQMGSFAGYK, LPTFTAGSEQIQMGSFAGYK, LVGVNSQTENAIEAMELAEWITNEQNQLIR, LWGSQEDQDMLAEMVEEFK, LWGSQEDQDMLAEMVEEFKK, LYAYPMTADNGYFLYYDK, NKEQIIAANTEGSVEAATIDGK, SLDSILAAADK, SLDSILAAADKAGK, SLQEQLDEMVDQIQSGQ, SVISEEEAKSLDSILAAADK, VAESDDVKANIPLAALAEQSKYATSQKDVLGSYWAPAEAFGTAMEAK		MP_MPAv1_NewWF_BGP_1_A.csv
	MP_MPAv1_NewWF_BGP_1_A.csv	1418	Meta-Protein 544	Metagenome unknown	root	5	6	contig2823000058_1, contig139398000036_2, ATB_S_contig057943	GSFTSQFSHYEEVPAQIAEQVIAESK, LVPVQLPIGEAEAFSGIVDLVAMK, TITATNAAGEEITIGAADGELAALVYK, TSLAEAMLFVAKVSLYDGSYHPVDSSEMAFK		MP_MPAv1_NewWF_BGP_1_A.csv
	MP_MPAv1_NewWF_BGP_1_A.csv	1419	Meta-Protein 545	CH601_RHOP2 60 kDa chaperonin 1 OS=Rhodopseudomonas palustris (strain HaA2) GN=groL1 PE=3 SV=1	Bacteria	3	1	Q2IZ16, P60364, A9BXL3, Q00767, A6U6I5	TNDIAGDGTTTATVLAQAIVR, TNDIAGDGTTTATVLAQALVRTNDLAGDGTTTATVLAQAIVR		MP_MPAv1_NewWF_BGP_1_A.csv
	MP_MPAv1_NewWF_BGP_1_A.csv	1420	Meta-Protein 546	Metagenome unknown	root	3	12	contig88000058_6, contig138565000018_16, contig139450000016_6, contig139756000013_28, contig1268000039_4	DLTPQEIMEGNFER, GDPITDMVENMAAEQKLAQVIISQFGGPDGELAASMR		MP_MPAv1_NewWF_BGP_1_A.csv
	MP_MPAv1_NewWF_BGP_1_A.csv	1421	Meta-Protein 547	Metagenome unknown	root	1	1	contig139623000075_11, ATB_B_contig040731	VLDIGCGPGTLSLPLSK		MP_MPAv1_NewWF_BGP_1_A.csv
	MP_MPAv1_NewWF_BGP_1_A.csv	1422	Meta-Protein 548	Metagenome unknown	root	1	2	contig59000078_10, contig139229000074_67, contig104963000025_1	LGIQAFEPVLVEGR		MP_MPAv1_NewWF_BGP_1_A.csv
	MP_MPAv1_NewWF_BGP_1_A.csv	1423	Meta-Protein 549	Metagenome unknown	root	1	1	contig139419000027_10, ATB_S_contig085632	VGIMIAGGDYPDLIGPGQAR		MP_MPAv1_NewWF_BGP_1_A.csv
	MP_MPAv1_NewWF_BGP_1_A.csv	1424	Meta-Protein 550	Metagenome unknown	root	1	1	contig6928000056_2, contig31410000025_1	IRDLDMAEEIMAFTK		MP_MPAv1_NewWF_BGP_1_A.csv
	MP_MPAv1_NewWF_BGP_1_A.csv	1425	Meta-Protein 551	Metagenome unknown	root	3	4	contig837000007_6, Q03IL2, contig139571000012_24, contig225000079_5, contig620000012_4, Q9CE35	SGDIDPGAIFYIMK, SGDIDPGAIFYLMKVFVIPTDEELVIAR		MP_MPAv1_NewWF_BGP_1_A.csv
	MP_MPAv1_NewWF_BGP_1_A.csv	1426	Meta-Protein 552	Metagenome unknown	root	1	1	contig787000044_90, contig2406000038_60	AHASTTGVADYLPAVSGFLMEK		MP_MPAv1_NewWF_BGP_1_A.csv
	MP_MPAv1_NewWF_BGP_1_A.csv	1427	Meta-Protein 553	Metagenome unknown	root	2	2	ATB_S_contig055162, contig6612000042_1, contig139807000041_2	DSILQLIRDSILQLLR		MP_MPAv1_NewWF_BGP_1_A.csv
	MP_MPAv1_NewWF_BGP_1_A.csv	1428	Meta-Protein 554	Metagenome unknown	root	1	1	contig8438000031_26, contig65000049_12	NLDANNIGAMFVVDPR		MP_MPAv1_NewWF_BGP_1_A.csv
	MP_MPAv1_NewWF_BGP_1_A.csv	1429	Meta-Protein 555	Metagenome unknown	root	1	2	contig2474000064_4, contig876000060_1, contig139178000058_4, contig559000005_4	EALSWLYANIEDR		MP_MPAv1_NewWF_BGP_1_A.csv
	MP_MPAv1_NewWF_BGP_1_A.csv	1430	Meta-Protein 556	Metagenome unknown	root	2	6	ATB_G5_contig091681, contig14263000054_1	AEFAQVMDNLLKALENAVANGLLKGDNGK		MP_MPAv1_NewWF_BGP_1_A.csv
	MP_MPAv1_NewWF_BGP_1_A.csv	1431	Meta-Protein 1572	Metagenome unknown	root	1	1	contig139235000074_1	DYQIAYTLDDLMSIKEGK		MP_MPAv1_NewWF_BGP_1_A.csv
	MP_MPAv1_NewWF_BGP_1_A.csv	1432	Meta-Protein 557	Metagenome unknown	root	3	10	contig8956000026_1, contig253000075_1, contig7547000031_1, contig3598000001_1, contig94302000066_6, contig3272000016_4, contig36869000053_1, contig139383000007_2, contig139091000060_20	AMLDLGPAWIDR, AMLDLGPAWLDRTILAEAVANGLEDGIINGVG		MP_MPAv1_NewWF_BGP_1_A.csv
	MP_MPAv1_NewWF_BGP_1_A.csv	1433	Meta-Protein 558	Metagenome unknown	root	1	1	contig51419000041_2, contig138960000062_2	AVAGALTDLTPFIER		MP_MPAv1_NewWF_BGP_1_A.csv
	MP_MPAv1_NewWF_BGP_1_A.csv	1434	Meta-Protein 559	Metagenome unknown	Paracoccidioides sp. 'lutzii' Pb01	1	2	contig587000037_2, Q96VN5, contig1812000043_1	VVIAYEPIWAIGTGK		MP_MPAv1_NewWF_BGP_1_A.csv
	MP_MPAv1_NewWF_BGP_1_A.csv	1435	Meta-Protein 560	Metagenome unknown	root	2	2	contig139272000074_11, contig43006000061_2, contig640000056_49, Q5HIC7, contig62000061_2, contig139804000029_78, Q5WLR4	ILDYAEAGDNIGALLRLLDYAEAGDNIGALLR		MP_MPAv1_NewWF_BGP_1_A.csv
	MP_MPAv1_NewWF_BGP_1_A.csv	1436	Meta-Protein 561	Metagenome unknown	root	1	2	contig14731000069_1, ATB_B_contig049802, contig138688000035_2	IYPVNPFAGPELLGEK		MP_MPAv1_NewWF_BGP_1_A.csv
	MP_MPAv1_NewWF_BGP_1_A.csv	1437	Meta-Protein 562	ENO_MARMM Enolase OS=Maricaulis maris (strain MCS10) GN=eno PE=3 SV=2	root	2	1	Q0APT2, contig749000038_6, B1LZU6	GNPTVEVDVILEDGSFGRGNPTVEVDVLLEDGSFGR		MP_MPAv1_NewWF_BGP_1_A.csv
	MP_MPAv1_NewWF_BGP_1_A.csv	1438	Meta-Protein 563	Metagenome unknown	root	3	2	contig139405000012_4, contig6525000006_2, contig14771000043_1, contig4162000048_2	NDFTIGIVDDVTFK, TKEPGSIGEPLYLDVKTKEPGSLGEPLYLDVK		MP_MPAv1_NewWF_BGP_1_A.csv
	MP_MPAv1_NewWF_BGP_1_A.csv	1439	Meta-Protein 564	Metagenome unknown	root	3	15	contig919000052_2, contig391000069_6, ATB_S_contig112573, contig27704000060_1, contig139849000029_305	DVPEVQLADLEWADAIIFSVPTR, QFLDTTGGLWFRRVPELAPPAAIESNPAWK		MP_MPAv1_NewWF_BGP_1_A.csv
	MP_MPAv1_NewWF_BGP_1_A.csv	1440	Meta-Protein 565	Metagenome unknown	root	1	2	contig139252000057_20, contig139074000039_33	IEGFVVFVPNTSVGDEVR		MP_MPAv1_NewWF_BGP_1_A.csv
	MP_MPAv1_NewWF_BGP_1_A.csv	1441	Meta-Protein 566	Metagenome unknown	root	2	2	contig192000015_1, contig39138000031_1, ATB_S_contig065572	QDEILPGLLLRVGDGNYIGAGIYGGYVQK		MP_MPAv1_NewWF_BGP_1_A.csv
	MP_MPAv1_NewWF_BGP_1_A.csv	1442	Meta-Protein 567	Metagenome unknown	Bacteroides thetaiotaomicron VPI-5482	1	2	contig27995000009_1, Q8A753, contig72084000060_1	VDFNVPLDENFNITDDTR		MP_MPAv1_NewWF_BGP_1_A.csv
	MP_MPAv1_NewWF_BGP_1_A.csv	1443	Meta-Protein 568	Metagenome unknown	root	1	4	contig7157000018_2, contig52699000077_2, contig139032000034_4	ITLYNAMSEADFTLTAAPK		MP_MPAv1_NewWF_BGP_1_A.csv
	MP_MPAv1_NewWF_BGP_1_A.csv	1444	Meta-Protein 569	Metagenome unknown	root	1	1	contig3563000048_2, contig35606000064_1	ILENTFRNVNIALVNEMAIICEK		MP_MPAv1_NewWF_BGP_1_A.csv
	MP_MPAv1_NewWF_BGP_1_A.csv	1445	Meta-Protein 570	Metagenome unknown	root	1	1	contig45111000034_3, contig47348000011_2	LADVIMVLAPDEIQAK		MP_MPAv1_NewWF_BGP_1_A.csv
	MP_MPAv1_NewWF_BGP_1_A.csv	1446	Meta-Protein 571	Metagenome unknown	root	6	7	contig6539000074_1, contig623000019_1, contig140005000046_7, contig48371000011_2, contig351000053_2, contig139683000041_11	AFVYHGPENMSLDQVPKPK, GADVTIEANGFEPTFK, IPELIDLIK, IPELINLIK, LPELLDLLKLWGPANIIAVDIDDSRLEFAQK		MP_MPAv1_NewWF_BGP_1_A.csv
	MP_MPAv1_NewWF_BGP_1_A.csv	1447	Meta-Protein 1573	Metagenome unknown	root	1	1	contig139478000012_4	LISVPEDVR		MP_MPAv1_NewWF_BGP_1_A.csv
	MP_MPAv1_NewWF_BGP_1_A.csv	1448	Meta-Protein 572	Metagenome unknown	root	1	4	contig1219000015_9, contig139229000074_46, contig5936000076_11, B2TII9, contig138324000064_22, Q8XHT7, contig139416000027_5, Q97EJ2	VMTDPIADLLTR		MP_MPAv1_NewWF_BGP_1_A.csv
	MP_MPAv1_NewWF_BGP_1_A.csv	1449	Meta-Protein 573	Metagenome unknown	root	1	1	contig139703000004_2, contig129337000070_1	AGGILGIMNELAK		MP_MPAv1_NewWF_BGP_1_A.csv
	MP_MPAv1_NewWF_BGP_1_A.csv	1450	Meta-Protein 574	Metagenome unknown	root	2	4	contig3113000011_1, contig294000050_2, contig764000062_6, contig16192000014_16	ANVSEIMNIIGEVKDIADILGIELGK		MP_MPAv1_NewWF_BGP_1_A.csv
	MP_MPAv1_NewWF_BGP_1_A.csv	1451	Meta-Protein 575	Metagenome unknown	root	1	1	contig2247000025_24, contig38104000036_1	FLGFEQIFK		MP_MPAv1_NewWF_BGP_1_A.csv
	MP_MPAv1_NewWF_BGP_1_A.csv	1452	Meta-Protein 576	Metagenome unknown	root	5	6	contig723000004_2, contig13607000028_1, contig3334000020_11, contig891000031_3	GIFGIIQDVNPEDDPLIYEALTTPR, LKATQAEHGDVVKPEVFAK, NHDPMANLDFLVVPLGK, TSTAMIPGQTIVGDDIAYLKTSTAMLPGQTIVGDDIAYLK		MP_MPAv1_NewWF_BGP_1_A.csv
	MP_MPAv1_NewWF_BGP_1_A.csv	1453	Meta-Protein 577	Metagenome unknown	root	2	7	contig46217000007_4, contig52950000076_4, contig139210000000_32	IGEALSNGDVEGAKDIARMEDASITFLDQVIK		MP_MPAv1_NewWF_BGP_1_A.csv
	MP_MPAv1_NewWF_BGP_1_A.csv	1454	Meta-Protein 578	Metagenome unknown	root	1	1	contig139724000014_7, contig29892000061_11	VNQIGTLTETLNAIEMAK		MP_MPAv1_NewWF_BGP_1_A.csv
	MP_MPAv1_NewWF_BGP_1_A.csv	1455	Meta-Protein 579	Metagenome unknown	root	1	1	contig734000069_7, contig139129000015_7	DLAWFGEFGK		MP_MPAv1_NewWF_BGP_1_A.csv
	MP_MPAv1_NewWF_BGP_1_A.csv	1456	Meta-Protein 580	Metagenome unknown	root	6	16	contig5612000048_3, contig139619000068_6, contig8322000008_13, contig13099000048_4, ATB_S_contig014211, ATB_S_contig095921	ALALNDEKWVADAIDGSLDLVTAADGR, DALRELFEAIEASGK, DFLNWLVYDPEGQKR, LAENVPVNGLLDTFDLMK, LVLDASIMPAFKNITIVPEDPLAASLLEYVR		MP_MPAv1_NewWF_BGP_1_A.csv
	MP_MPAv1_NewWF_BGP_1_A.csv	1457	Meta-Protein 581	Metagenome unknown	root	1	3	contig7882000035_2, contig562000033_2, contig230000041_2, contig12580000069_1	YINPDVIVASMIK		MP_MPAv1_NewWF_BGP_1_A.csv
	MP_MPAv1_NewWF_BGP_1_A.csv	1458	Meta-Protein 582	Metagenome unknown	root	3	4	contig23000019_20, contig1093000005_64	AIIIDENTNVLVMGITGR, AVGLTFIDVLKVAPLPFDVPQLVK		MP_MPAv1_NewWF_BGP_1_A.csv
	MP_MPAv1_NewWF_BGP_1_A.csv	1459	Meta-Protein 583	Metagenome unknown	root	7	13	contig138621000032_50, contig139895000029_26, contig6507000030_1, contig3999000053_3, contig5166000008_1, contig9596000072_1	DLGIDVDNLLK, DVWGTDDPAVIKDK, GYAIISGDGDLWHAVENSSDQGWIVDGK, NLTQYDETINGYWR, VGPGWDKFFQAAEDLK, VINLWSFTDEVPKVLNLWSFTDEVPK		MP_MPAv1_NewWF_BGP_1_A.csv
	MP_MPAv1_NewWF_BGP_1_A.csv	1460	Meta-Protein 584	Metagenome unknown	root	7	11	contig138789000006_103, contig710000053_6, contig4393000041_2, contig627000060_2, contig22000066_8, contig1825000072_1, contig7779000045_1, contig286000057_47, contig138821000055_55, contig31000014_165, contig110000011_6, contig952000057_166	AIGLVIPEIDGK, AIGLVIPELAGK, AIGLVIPELDGK, AIGLVIPELDGKLAGAAQR, ENSIVVDGTEIR, QMFGAEGYEIVAINDLTDAKQMFGAEGYEIVALNDLTDAK		MP_MPAv1_NewWF_BGP_1_A.csv
	MP_MPAv1_NewWF_BGP_1_A.csv	1461	Meta-Protein 585	Metagenome unknown	root	2	3	contig95525000042_2, contig129727000025_1, contig764000012_6	EGTNLWFDVMAVPSNAKMQNPDLAFAIPK		MP_MPAv1_NewWF_BGP_1_A.csv
	MP_MPAv1_NewWF_BGP_1_A.csv	1462	Meta-Protein 586	K2C1_HUMAN Keratin, type II cytoskeletal 1 OS=Homo sapiens GN=KRT1 PE=1 SV=6	Mammalia	1	2	P04264, Q08D91, Q4FZU2, Q922U2	SLDLDSIIAEVK		MP_MPAv1_NewWF_BGP_1_A.csv
	MP_MPAv1_NewWF_BGP_1_A.csv	1463	Meta-Protein 587	Metagenome unknown	root	1	2	contig362000025_2, contig138961000072_2, contig61432000039_7, contig139069000062_15	GLVFLPYLTGER		MP_MPAv1_NewWF_BGP_1_A.csv
	MP_MPAv1_NewWF_BGP_1_A.csv	1464	Meta-Protein 588	Metagenome unknown	root	2	1	contig33357000002_1, contig27220000050_2, contig3737000015_5	DFNDSFSIELLNRDFNDSFSLEILNR		MP_MPAv1_NewWF_BGP_1_A.csv
	MP_MPAv1_NewWF_BGP_1_A.csv	1465	Meta-Protein 589	Metagenome unknown	root	10	37	contig26310000014_3, contig54241000029_2, contig1067000066_1, contig138790000079_10	AMLDLGPVWLDR, GIAEQGDIFEPIGMIR, IEYSDEYHFLEDERVYLTK, IFEPIGMIR, ITEVLLVVNPQDYLR, LCSDIEKELNAEFK, TILGEAIANGLEDGIINGR, VVQSAYMDEGTAVLGLAK, YLMAMGIGDKYVLDIFPFPTR		MP_MPAv1_NewWF_BGP_1_A.csv
	MP_MPAv1_NewWF_BGP_1_A.csv	1466	Meta-Protein 590	Metagenome unknown	root	7	15	ATB_S_contig028073, contig533000032_1, contig36597000069_1	AANHDEIPENLRDSADVPR, ESLDAVYDLLEPYK, FDGSGILKGGPNPENAK, LYPGIAVDLIR, MQAEAPRPGGDIILGIAK, NAIFTASSTMVPEAVARVVHPDAPGPGPLPPLSEVVLIDYDDAK		MP_MPAv1_NewWF_BGP_1_A.csv
	MP_MPAv1_NewWF_BGP_1_A.csv	1467	Meta-Protein 591	Metagenome unknown	root	3	6	contig7696000077_1, contig1093000005_68, contig21103000010_1	GFIQDVIDPR, IQEGVDALDGYGQIFFRMLYAYSEATTPK		MP_MPAv1_NewWF_BGP_1_A.csv
	MP_MPAv1_NewWF_BGP_1_A.csv	1468	Meta-Protein 592	Metagenome unknown	root	10	30	contig138066000009_17, ATB_S_contig183263, contig694000011_24, contig3330000040_4, contig139528000067_14, contig1517000016_3, contig103444000009_1, contig7618000052_2, contig1193000027_2, contig208000021_27	AAGVNYGFTQIPSYK, DAIENAVEIIVQTIK, DLVGEDGIGSFEELVELYHAELAPK, ETMLAIYEGDPRPTAFLPAAEIINEDPDMR, LLDEGVIAR, MLANIFLNDFVATK, MLANIFLNEFVATK, MLANLFLNDFVATK, MLANLFLNEFVATKNFVAEYGIPVK		MP_MPAv1_NewWF_BGP_1_A.csv
	MP_MPAv1_NewWF_BGP_1_A.csv	1469	Meta-Protein 593	Metagenome unknown	root	1	2	contig1505000079_9, contig6578000035_14	VLADGSIQDPAEYGWPLEMAR		MP_MPAv1_NewWF_BGP_1_A.csv
	MP_MPAv1_NewWF_BGP_1_A.csv	1470	Meta-Protein 594	Metagenome unknown	root	4	9	contig16673000013_6, contig18072000029_1, contig2223000052_1, contig470000073_1, contig358000054_1	MGNNLYTASVNSGEATIR, MGNNLYTASVNSGEATLR, MITTGDEILQDIINLKMITTGDEILQDIINLKR		MP_MPAv1_NewWF_BGP_1_A.csv
	MP_MPAv1_NewWF_BGP_1_A.csv	1471	Meta-Protein 595	Metagenome unknown	root	1	1	contig316000075_2, contig210000027_14	AYDPTVFAALPVLK		MP_MPAv1_NewWF_BGP_1_A.csv
	MP_MPAv1_NewWF_BGP_1_A.csv	1472	Meta-Protein 596	Metagenome unknown	root	3	3	contig140034000054_3, contig139051000039_27, B0TCA0, contig1300000037_1, contig140000000054_7	TNDVAGDGTTTATILAQAIIR, TNDVAGDGTTTATLLAQAIIRTNDVAGDGTTTATLLAQALIR		MP_MPAv1_NewWF_BGP_1_A.csv
	MP_MPAv1_NewWF_BGP_1_A.csv	1473	Meta-Protein 1574	EFTU_YEAST Elongation factor Tu, mitochondrial OS=Saccharomyces cerevisiae (strain ATCC 204508 / S288c) GN=TUF1 PE=1 SV=1	Saccharomyces cerevisiae S288c	1	1	P02992	DLNKPFLMPVEDIFSISGR		MP_MPAv1_NewWF_BGP_1_A.csv
	MP_MPAv1_NewWF_BGP_1_A.csv	1474	Meta-Protein 597	Metagenome unknown	root	1	1	contig139237000057_20, contig308000043_13	VALTGLGLPSEMAEYIR		MP_MPAv1_NewWF_BGP_1_A.csv
	MP_MPAv1_NewWF_BGP_1_A.csv	1475	Meta-Protein 598	Metagenome unknown	root	1	3	contig3954000015_2, contig2575000063_1, contig139946000046_55	ASGAPVIAGAIEFAADMAK		MP_MPAv1_NewWF_BGP_1_A.csv
	MP_MPAv1_NewWF_BGP_1_A.csv	1476	Meta-Protein 599	ARCA_CLOP1 Arginine deiminase OS=Clostridium perfringens (strain ATCC 13124 / DSM 756 / JCM 1290 / NCIMB 6125 / NCTC 8237 / Type A) GN=arcA PE=3 SV=1	Clostridia	1	1	Q0TUR5, B8D2J5	LLFDDIPYLK		MP_MPAv1_NewWF_BGP_1_A.csv
	MP_MPAv1_NewWF_BGP_1_A.csv	1477	Meta-Protein 600	Metagenome unknown	root	2	5	contig2550000034_2, contig16794000052_1	DLAEIVFLLPGKSIGWNIALADNDGLFR		MP_MPAv1_NewWF_BGP_1_A.csv
	MP_MPAv1_NewWF_BGP_1_A.csv	1478	Meta-Protein 601	Metagenome unknown	root	1	3	contig1107000052_16, contig13474000013_45, contig139026000050_11, contig287000026_8, contig139588000012_8	EADFIDIVTWR		MP_MPAv1_NewWF_BGP_1_A.csv
	MP_MPAv1_NewWF_BGP_1_A.csv	1479	Meta-Protein 602	Metagenome unknown	root	1	4	contig138944000072_9, contig139494000053_11, ATB_G5_contig042371	EGAEVLAVAGEDPILVVGTYGQGK		MP_MPAv1_NewWF_BGP_1_A.csv
	MP_MPAv1_NewWF_BGP_1_A.csv	1480	Meta-Protein 1575	Metagenome unknown	root	1	1	contig3932000068_1	AEAFVVLYNTMLDR		MP_MPAv1_NewWF_BGP_1_A.csv
	MP_MPAv1_NewWF_BGP_1_A.csv	1481	Meta-Protein 603	PSBB_ATRBE Photosystem II CP47 reaction center protein OS=Atropa belladonna GN=psbB PE=3 SV=1	Eukaryota	3	4	Q7FNS4, A4QKV7, Q85X12, Q19VC2, B2XWP9, P56307, B5LMP9, A6MME8, B1A961, A9LYC6, A6MM62, Q06J24, A4QK44	QGMFVIPFMTR, QGMFVLPFMTRRAQLGEIFELDR		MP_MPAv1_NewWF_BGP_1_A.csv
	MP_MPAv1_NewWF_BGP_1_A.csv	1482	Meta-Protein 604	Metagenome unknown	root	17	47	contig7304000005_25, contig306000076_4, contig4488000073_2, contig437000001_7, contig780000074_23, contig117890000079_1, contig139916000046_16, contig62717000002_2, contig22627000005_10, contig61432000039_8, contig5901000049_6, contig139474000022_11, contig21690000026_34, contig134000009_23, contig33000035_3, contig139677000014_39, contig139734000013_24, contig5824000076_50, contig58925000005_1, …	AEAAFEFMSK, AKAEAAFEFMSK, EGYETLLNTDLKLELDNLAR, EIGFTGQFLIEPK, ELGGENYVFWGGR, ELSEYAMANQEIK, FLHMAVDYAK, FMHGAATSPNADVFAYAAAR, GEVGFKELSEYAMANQEIK, INIEANHATLAGHTFQHELR, INLEANHATLAGHTFQHELR, LNIEANHATLAGHTFQHELR, LTSGRQELLETILNR, NLDEITALLK, QELLETILNR, VHAAFEFMEKYMHGAATSPNADVFAYAAAR		MP_MPAv1_NewWF_BGP_1_A.csv
	MP_MPAv1_NewWF_BGP_1_A.csv	1483	Meta-Protein 605	Metagenome unknown	root	1	2	contig4491000029_1, contig138826000011_2, contig15748000008_5	SFIEPGEIINGWQVEVAPK		MP_MPAv1_NewWF_BGP_1_A.csv
	MP_MPAv1_NewWF_BGP_1_A.csv	1484	Meta-Protein 606	Metagenome unknown	root	5	2	contig139134000015_6, contig365000045_49, contig119000016_4, contig21327000017_6, contig1322000076_2, contig57000009_14, contig3275000032_23, contig5816000026_1, contig1692000054_10, Q9EV94, contig2761000021_1, contig5208000018_12, contig138626000001_12	IVGFQEGIIDMSGPGADYTPFSK, TVIITDEYAGR, TVILTDEYAGR, TVLITDEYAGRTVLLTDEYAGR		MP_MPAv1_NewWF_BGP_1_A.csv
	MP_MPAv1_NewWF_BGP_1_A.csv	1485	Meta-Protein 607	Metagenome unknown	Rhodococcus erythropolis PR4	1	1	contig7855000055_2, C0ZVT7	ETDKPFLMPVEDVFTITGR		MP_MPAv1_NewWF_BGP_1_A.csv
	MP_MPAv1_NewWF_BGP_1_A.csv	1486	Meta-Protein 608	Metagenome unknown	root	1	1	contig19837000010_2, contig114308000074_6	YLGEILGAEVVWDDAAR		MP_MPAv1_NewWF_BGP_1_A.csv
	MP_MPAv1_NewWF_BGP_1_A.csv	1487	Meta-Protein 609	Metagenome unknown	root	9	10	contig16662000075_1, contig13960000041_1, contig66118000015_6, B6YQT0, contig534000025_2, contig60097000042_1, contig12173000077_1, contig15830000024_3, contig5110000066_4	AAVEEGTVPGGGVAYIR, AAVEEGTVPGGGVAYLR, EIQTGKPLLIIAEDIDSEALTTLVVNR, EIQTGKPLLIIAEDVESEALTTLVVNR, GIETYVDVVEGMQFDR, GLTLESATLDMLGR, TNDDAGDGTTTAIVLAQSIINVGLK, TNDDAGDGTTTAIVLAQSIISVGLKVALENAASVAGMFLTTECVITDKK		MP_MPAv1_NewWF_BGP_1_A.csv
	MP_MPAv1_NewWF_BGP_1_A.csv	1488	Meta-Protein 610	Metagenome unknown	Lactococcus lactis subsp. lactis Il1403	1	2	contig57444000053_1, Q07637	GDMGIEVPFEMVPVYQK		MP_MPAv1_NewWF_BGP_1_A.csv
	MP_MPAv1_NewWF_BGP_1_A.csv	1489	Meta-Protein 611	Metagenome unknown	root	6	11	ATB_B_contig075713, contig139215000021_3, contig1912000072_31	AAGATVLADVREVYEQADLIIK, ATLVTQDGKIVHEGTLESMR, HLEPEWLEKER, LVELGIPDELAVGEGGYAK, NVFNFVDNLVAEGRVSATPETVSQFVK		MP_MPAv1_NewWF_BGP_1_A.csv
	MP_MPAv1_NewWF_BGP_1_A.csv	1490	Meta-Protein 612	Metagenome unknown	root	1	1	contig383000077_7, contig139556000067_2	ASFEQIDVLTAAFAGAK		MP_MPAv1_NewWF_BGP_1_A.csv
	MP_MPAv1_NewWF_BGP_1_A.csv	1491	Meta-Protein 613	MTTB1_METAC Trimethylamine methyltransferase MttB1 OS=Methanosarcina acetivorans (strain ATCC 35395 / DSM 2834 / JCM 12185 / C2A) GN=mttB1 PE=3 SV=4	root	6	14	Q8TTA9, contig10211000053_2, contig10211000053_9, O93658, contig8252000024_1, P58973, Q8TS73, contig2411000043_3	AIHYATMEVLMNPGVQVSDPEAR, DVAGQGAQDVHETLTPLANTSK, GTAPVGSPELGLISGAVAK, ICDWAENIDYFSLPVSAR, KGTAPVGSPELGLISGAVAKLCDWAENIDYFSLPVSAR		MP_MPAv1_NewWF_BGP_1_A.csv
	MP_MPAv1_NewWF_BGP_1_A.csv	1492	Meta-Protein 614	Metagenome unknown	root	1	2	contig15130000032_1, contig199000039_64	NNFYIDPTSIEDYIAR		MP_MPAv1_NewWF_BGP_1_A.csv
	MP_MPAv1_NewWF_BGP_1_A.csv	1493	Meta-Protein 615	Metagenome unknown	root	1	2	contig215000040_85, contig11940000023_3, contig139034000072_30	IIAEAIMEMWEK		MP_MPAv1_NewWF_BGP_1_A.csv
	MP_MPAv1_NewWF_BGP_1_A.csv	1494	Meta-Protein 616	ENO_CLOTH Enolase OS=Clostridium thermocellum (strain ATCC 27405 / DSM 1237 / NBRC 103400 / NCIMB 10682 / NRRL B-4536 / VPI 7372) GN=eno PE=3 SV=1	root	1	1	A3DBQ5, contig51000047_62	VNQIGTLTETLDAIEMANR		MP_MPAv1_NewWF_BGP_1_A.csv
	MP_MPAv1_NewWF_BGP_1_A.csv	1495	Meta-Protein 617	Metagenome unknown	root	2	1	contig30630000040_2, contig127424000065_2	MGAEAILDLLQRMGAEALLDLLQR		MP_MPAv1_NewWF_BGP_1_A.csv
	MP_MPAv1_NewWF_BGP_1_A.csv	1496	Meta-Protein 618	Metagenome unknown	root	2	7	contig47129000064_4, contig721000032_1, contig68996000027_2, contig91684000024_2	LLDPELVAVLGAVDKLLDPELVAVLGAVDKQVAR		MP_MPAv1_NewWF_BGP_1_A.csv
	MP_MPAv1_NewWF_BGP_1_A.csv	1497	Meta-Protein 619	Metagenome unknown	root	1	1	contig10866000062_1, contig3764000001_1	NAQDGISLIQTAEGALNETHSILQR		MP_MPAv1_NewWF_BGP_1_A.csv
	MP_MPAv1_NewWF_BGP_1_A.csv	1498	Meta-Protein 620	ENO_CLOP1 Enolase OS=Clostridium perfringens (strain ATCC 13124 / DSM 756 / JCM 1290 / NCIMB 6125 / NCTC 8237 / Type A) GN=eno PE=3 SV=1	root	26	68	Q0TQZ2, contig477000051_3, contig139083000073_3, A4XKV0, contig583000028_1, Q181T5, contig504000075_1, contig139453000077_5, Q2RLT8, contig11961000074_1, contig4292000032_9, contig139563000067_18, A6LR09, Q8XKU4, Q0STE0, B2TPW4, contig8966000024_1, contig1503000054_168, contig364000077_5, contig3036000048_3, contig139545000048_16, contig138542000032_5, contig138511000043_61, contig139349000010_15…	AAVPSGASTGMFEAVELR, AGYEAGKDMFIAIDAASSEYYKDGK, AIVPSGASTGAFEAVELR, ALVPSGASTGAFEAVELR, GIAQGVANSILIK, GIDMGVGNSILIK, GYSTAIGDEGGFAPNLK, IEEELDAVGEYAGLK, IEEELDEIAEYR, ILDTDEMIAYYK, KVQLVGDDLFVTNTERLEK, LNQIGTLTETLNAIEMANR, LTEAIGDKVQLVGDDLFVTNTER, LTEALGDKVQLVGDDLFVTNTER, MGAEVFHNLK, MGAEVFHNLR, MIINDVIAR, SGETEDTTIADIVVAVNAGQIK, SGETEDTTIADLVVATNSGQIK, SGETEDTTIADLVVAVNAGQIK, SLDLPLYQYVGGVNAK, S…		MP_MPAv1_NewWF_BGP_1_A.csv
	MP_MPAv1_NewWF_BGP_1_A.csv	1499	Meta-Protein 621	Metagenome unknown	root	2	4	ATB_S_contig123371, contig468000068_3, contig454000048_22	LEFEFLVPEGSRQTEQMALLFQQNMEDLGIK		MP_MPAv1_NewWF_BGP_1_A.csv
	MP_MPAv1_NewWF_BGP_1_A.csv	1500	Meta-Protein 622	Metagenome unknown	root	1	1	contig41330000024_2, contig338000060_10	MGIDVWEVIDAAK		MP_MPAv1_NewWF_BGP_1_A.csv
	MP_MPAv1_NewWF_BGP_1_A.csv	1501	Meta-Protein 623	Metagenome unknown	root	1	1	contig139853000041_87, contig721000039_1	VLLLDEPLGALDLK		MP_MPAv1_NewWF_BGP_1_A.csv
	MP_MPAv1_NewWF_BGP_1_A.csv	1502	Meta-Protein 624	Metagenome unknown	root	4	21	contig24108000068_1, contig36998000027_3, contig126970000068_1, contig38018000070_1, contig34406000049_1, contig19424000065_1, contig9906000038_4, contig787000055_1, contig9011000058_2, contig18696000025_5, contig36069000071_1, contig212000014_9, contig117951000018_1	MIINHNMNALNAHR, NAQDGISLIQTAEGALNETHAILQR, NAQDGISLLQTAEGALNETHAILQRNSQDGISMIQTAEGALNETHNILQR		MP_MPAv1_NewWF_BGP_1_A.csv
	MP_MPAv1_NewWF_BGP_1_A.csv	1503	Meta-Protein 625	Metagenome unknown	root	20	110	contig139723000041_7, contig30691000070_1, contig139221000058_39, ATB_G30_contig004842, contig2066000068_2, contig139799000041_28, contig5456000020_3, contig824000010_26	AIGINANPAFPDAGLYDER, AIGINANPAFPDAGVYNDR, ALAFAVNPEIIVER, DAQVAEEYGFWYDPDLAK, DDNWWGNAVFGQPKPK, DNELTYTPLWR, DNNLTYTPIWR, EIVDMIIYENNVALGMLMQR, FNQLPPLSDESLAVASEIQK, FNQLPPMSEESLAVASEIQK, HIWENVPGEDLMVITNDDPVGSGPYKK, MVPVSDSTGLFGGWTEYR, NIYFSDGQPLTAADVVFTYELAR, QMLDEAGYVDADGDGWR, RALAFAVNPEIIVER, THVTEGNYGRYDNQELFDLIYK, TLDLSNYFIPGVPAIK, VAEECGFWYDPEIAK, YDNQELFDLIFKYDNQELFDLIYK		MP_MPAv1_NewWF_BGP_1_A.csv
	MP_MPAv1_NewWF_BGP_1_A.csv	1504	Meta-Protein 626	Metagenome unknown	root	1	1	contig639000026_4, contig572000039_10	VNQIGTLTETLEAIEMANR		MP_MPAv1_NewWF_BGP_1_A.csv
	MP_MPAv1_NewWF_BGP_1_A.csv	1505	Meta-Protein 627	Metagenome unknown	root	1	1	contig139000000062_5, contig92997000073_23	MPGITGENFMILLESR		MP_MPAv1_NewWF_BGP_1_A.csv
	MP_MPAv1_NewWF_BGP_1_A.csv	1506	Meta-Protein 628	Metagenome unknown	root	11	13	contig10302000006_58, contig2227000018_3, contig26804000075_3, contig139100000017_13, contig513000041_5, contig306000000_15, contig5028000013_43, contig915000013_2, contig2474000064_7, contig5639000029_5, contig6084000053_1	EIELEDPYENIGAQLVK, EIELEDPYENLGAQLVK, GIEQAVEAVVAEIK, GIIDPAMVTR, GVGFDVLTEEYVDMVER, ISAVADILPVLEK, ISAVADLLPVLEK, KLEHGVNTLADAVK, QVIVTKEETTIVDGK, QVLVTKEETTIVDGKSYGSPTITNDGVTIAR		MP_MPAv1_NewWF_BGP_1_A.csv
	MP_MPAv1_NewWF_BGP_1_A.csv	1507	Meta-Protein 629	Metagenome unknown	root	1	2	contig1254000022_1, contig139090000062_7, contig352000018_6, contig139143000000_2	SVDTSMGFTPLEGLMMGTR		MP_MPAv1_NewWF_BGP_1_A.csv
	MP_MPAv1_NewWF_BGP_1_A.csv	1508	Meta-Protein 630	Metagenome unknown	root	3	10	ATB_S_contig011723, ATB_S_contig089802, contig375000012_4, contig973000026_50, contig5156000023_7, contig139946000046_24, contig139008000003_12, contig109961000016_7, contig139734000013_5	ALLKEPLHPYTR, LAPIEDFLPKVEILQLLQGLQR		MP_MPAv1_NewWF_BGP_1_A.csv
	MP_MPAv1_NewWF_BGP_1_A.csv	1509	Meta-Protein 631	Metagenome unknown	root	1	1	contig334000002_2, contig139826000013_16	GATPEMVEFLDAALAR		MP_MPAv1_NewWF_BGP_1_A.csv
	MP_MPAv1_NewWF_BGP_1_A.csv	1510	Meta-Protein 632	Metagenome unknown	Proteus mirabilis	1	1	contig63297000059_2, P42321	GPMLLQDVWFLEK		MP_MPAv1_NewWF_BGP_1_A.csv
	MP_MPAv1_NewWF_BGP_1_A.csv	1511	Meta-Protein 633	Metagenome unknown	root	1	1	contig139100000017_4, contig61471000006_1	AGIPLIEIVTAPDITSPR		MP_MPAv1_NewWF_BGP_1_A.csv
	MP_MPAv1_NewWF_BGP_1_A.csv	1512	Meta-Protein 634	Metagenome unknown	root	2	3	contig504000069_2, contig135624000071_1, contig19320000002_1	GIEVVVYEPALDADEFFRVAFFNELDSFAEIR		MP_MPAv1_NewWF_BGP_1_A.csv
	MP_MPAv1_NewWF_BGP_1_A.csv	1513	Meta-Protein 635	Metagenome unknown	Firmicutes	2	2	contig139388000067_3, Q97LM4, P54716, contig139473000056_4	SIGGVIEILDYMEKSIGGVLEILDYMEK		MP_MPAv1_NewWF_BGP_1_A.csv
	MP_MPAv1_NewWF_BGP_1_A.csv	1514	Meta-Protein 636	Metagenome unknown	root	1	1	contig301000061_5, contig1085000034_13	AGDFEVAPLMLAWSR		MP_MPAv1_NewWF_BGP_1_A.csv
	MP_MPAv1_NewWF_BGP_1_A.csv	1515	Meta-Protein 637	VATD_METAC V-type ATP synthase subunit D OS=Methanosarcina acetivorans (strain ATCC 35395 / DSM 2834 / JCM 12185 / C2A) GN=atpD PE=3 SV=1	root	1	3	Q8TII9, contig20188000069_2, contig3967000044_55, contig105114000026_41	DGLILEFFK		MP_MPAv1_NewWF_BGP_1_A.csv
	MP_MPAv1_NewWF_BGP_1_A.csv	1516	Meta-Protein 638	Metagenome unknown	root	2	1	contig139911000041_34, contig560000012_8, contig9685000052_9	SIDTSMGFTPLEGLMMGTRSLDTSMGFTPLEGLMMGTR		MP_MPAv1_NewWF_BGP_1_A.csv
	MP_MPAv1_NewWF_BGP_1_A.csv	1517	Meta-Protein 1576	Metagenome unknown	root	1	1	contig65814000030_25	SVETSMGFTPLEGLMMGTR		MP_MPAv1_NewWF_BGP_1_A.csv
	MP_MPAv1_NewWF_BGP_1_A.csv	1518	Meta-Protein 1577	Metagenome unknown	root	1	1	contig763000014_3	DIELEDPFENIGAQLVK		MP_MPAv1_NewWF_BGP_1_A.csv
	MP_MPAv1_NewWF_BGP_1_A.csv	1519	Meta-Protein 639	Metagenome unknown	root	2	3	contig139363000022_32, contig73000016_29, contig139252000058_11, contig11065000069_2	ILDIEHLLNRMVAGLEEITEGELYIGDKLMNDVAPK		MP_MPAv1_NewWF_BGP_1_A.csv
	MP_MPAv1_NewWF_BGP_1_A.csv	1520	Meta-Protein 640	ENO_STRT2 Enolase OS=Streptococcus thermophilus (strain ATCC BAA-250 / LMG 18311) GN=eno PE=3 SV=1	root	8	21	Q5M561, contig138855000079_17, Q1JML5, Q97QS2, Q72XY5, contig139433000077_32, P64081, Q03LI0, contig139824000029_40, C1C7C0, contig14903000026_8, Q81X78	AAADYLEVPLYSYLGGFNTK, AVDNVNNIIAEAIIGFDVR, AVDNVNNIIAEAIIGFDVRDQQAIDR, FEGTEDAVETILSAIK, GIKEEAANSILIK, IEDQLGEVAEYR, VNQIGTLTETFEAIEMAKVQLVGDDFFVTNTSYLAR		MP_MPAv1_NewWF_BGP_1_A.csv
	MP_MPAv1_NewWF_BGP_1_A.csv	1521	Meta-Protein 641	RS18_CLOK5 30S ribosomal protein S18 OS=Clostridium kluyveri (strain ATCC 8527 / DSM 555 / NCIMB 10680) GN=rpsR PE=3 SV=1	Clostridium	1	1	A5N438, B1IHQ2	NIALLPFTTE		MP_MPAv1_NewWF_BGP_1_A.csv
	MP_MPAv1_NewWF_BGP_1_A.csv	1522	Meta-Protein 642	Metagenome unknown	root	1	1	ATB_G30_contig079083, contig425000066_3	FMDEGYPLQLIFPK		MP_MPAv1_NewWF_BGP_1_A.csv
	MP_MPAv1_NewWF_BGP_1_A.csv	1523	Meta-Protein 643	Metagenome unknown	root	1	2	contig7568000023_1, contig1083000033_20	FTIELITPIAMEEGLR		MP_MPAv1_NewWF_BGP_1_A.csv
	MP_MPAv1_NewWF_BGP_1_A.csv	1524	Meta-Protein 644	Metagenome unknown	root	1	1	contig750000062_14, ATB_G5_contig025073	GNEVTFGEFGLQALEPGWIK		MP_MPAv1_NewWF_BGP_1_A.csv
	MP_MPAv1_NewWF_BGP_1_A.csv	1525	Meta-Protein 645	Metagenome unknown	root	1	1	contig39014000039_1, contig31439000021_1	LAIAENLIYPLIEGADTR		MP_MPAv1_NewWF_BGP_1_A.csv
	MP_MPAv1_NewWF_BGP_1_A.csv	1526	Meta-Protein 646	Metagenome unknown	root	3	4	contig13532000008_2, contig64110000019_5	IIDWLAEDFLKEEGIDLR, ITDAVITVPAYFNDSQRVDIDGHLYSPQEISAIILQK		MP_MPAv1_NewWF_BGP_1_A.csv
	MP_MPAv1_NewWF_BGP_1_A.csv	1527	Meta-Protein 647	Metagenome unknown	root	1	2	contig1413000030_1, contig35612000018_7	AGIEPSMVEEVYFGNVLGAGLGQNVAR		MP_MPAv1_NewWF_BGP_1_A.csv
	MP_MPAv1_NewWF_BGP_1_A.csv	1528	Meta-Protein 648	Metagenome unknown	root	5	10	contig13833000065_1, contig221000056_9, contig3665000074_5, contig24247000063_1	DGVDYLLISAANASGWDDVLQSAK, DGVDYLLISAANASGWDDVLQSAKR, GIVYQQELILDTNTITDEHIEK, QANVEDMFEVFSRYGINEDPGKGVITR		MP_MPAv1_NewWF_BGP_1_A.csv
	MP_MPAv1_NewWF_BGP_1_A.csv	1529	Meta-Protein 649	Metagenome unknown	root	1	2	contig31177000061_7, contig138656000001_9	DVEKPFLMPVEDVFSITGR		MP_MPAv1_NewWF_BGP_1_A.csv
	MP_MPAv1_NewWF_BGP_1_A.csv	1530	Meta-Protein 650	Metagenome unknown	root	1	1	contig218000021_113, contig7312000005_62	AVDAIFGFEPDDILPDAYK		MP_MPAv1_NewWF_BGP_1_A.csv
	MP_MPAv1_NewWF_BGP_1_A.csv	1531	Meta-Protein 651	Metagenome unknown	root	1	2	contig53089000007_1, contig16000041_1, contig55621000030_17, contig122447000065_3	NAQDAISLIQTAEGALNETHAILQR		MP_MPAv1_NewWF_BGP_1_A.csv
	MP_MPAv1_NewWF_BGP_1_A.csv	1532	Meta-Protein 652	Metagenome unknown	root	1	2	contig151000025_41, ATB_G5_contig019023	EVAIVSLADAVEAAVR		MP_MPAv1_NewWF_BGP_1_A.csv
	MP_MPAv1_NewWF_BGP_1_A.csv	1533	Meta-Protein 1578	BTBDJ_BOVIN BTB/POZ domain-containing protein 19 OS=Bos taurus GN=BTBD19 PE=2 SV=1	Bos taurus	1	1	A6QPA3	HSVLEVLTAAVEYGLEELR		MP_MPAv1_NewWF_BGP_1_A.csv
	MP_MPAv1_NewWF_BGP_1_A.csv	1534	Meta-Protein 1579	Metagenome unknown	root	1	1	contig43040000013_2	TPAVSMPIDPVDIFLEK		MP_MPAv1_NewWF_BGP_1_A.csv
	MP_MPAv1_NewWF_BGP_1_A.csv	1535	Meta-Protein 653	Metagenome unknown	root	1	2	contig4327000065_4, contig139842000029_20, contig1238000012_2, contig139215000074_13	SSTMDGLDSLLSVVQMPK		MP_MPAv1_NewWF_BGP_1_A.csv
	MP_MPAv1_NewWF_BGP_1_A.csv	1536	Meta-Protein 654	Metagenome unknown	root	2	5	contig2433000054_14, contig139074000034_1, contig108342000024_2, contig22065000000_14, ATB_B_contig057282, contig702000040_7	EFDLLHIFMQNVGKILIVDDEPSIQELIR		MP_MPAv1_NewWF_BGP_1_A.csv
	MP_MPAv1_NewWF_BGP_1_A.csv	1537	Meta-Protein 655	Metagenome unknown	root	1	2	ATB_B_contig045242, Q8Q093, contig2065000065_7	ETILVPGVFDMPLAIK		MP_MPAv1_NewWF_BGP_1_A.csv
	MP_MPAv1_NewWF_BGP_1_A.csv	1538	Meta-Protein 656	RECA_ACEAC Protein RecA (Fragment) OS=Acetobacter aceti GN=recA PE=3 SV=2	root	2	1	Q08784, contig493000052_2	SGAVDVIVVDSVAALVPRSGAVDVLVVDSVAALVPR		MP_MPAv1_NewWF_BGP_1_A.csv
	MP_MPAv1_NewWF_BGP_1_A.csv	1539	Meta-Protein 657	Metagenome unknown	root	1	4	contig4681000004_3, contig139405000022_1, contig327000022_24, contig57822000018_2	ALVVEPQVLLFDEPLSNLDAK		MP_MPAv1_NewWF_BGP_1_A.csv
	MP_MPAv1_NewWF_BGP_1_A.csv	1540	Meta-Protein 658	Metagenome unknown	root	1	2	contig139175000040_15, contig538000002_1	IDIALITPIAIEEGLR		MP_MPAv1_NewWF_BGP_1_A.csv
	MP_MPAv1_NewWF_BGP_1_A.csv	1541	Meta-Protein 659	Metagenome unknown	root	1	1	contig21491000005_2, contig898000046_1	SGAVDVVVIDSVAALVPR		MP_MPAv1_NewWF_BGP_1_A.csv
	MP_MPAv1_NewWF_BGP_1_A.csv	1542	Meta-Protein 660	Metagenome unknown	root	1	3	contig138860000025_9, contig26733000075_7	VGVGDVLIGAAALAADYNGVSK		MP_MPAv1_NewWF_BGP_1_A.csv
	MP_MPAv1_NewWF_BGP_1_A.csv	1543	Meta-Protein 661	Metagenome unknown	root	1	1	ATB_S_contig147451, contig215000017_2	LTGLEYLNLIGDVYGVDGATR		MP_MPAv1_NewWF_BGP_1_A.csv
	MP_MPAv1_NewWF_BGP_1_A.csv	1544	Meta-Protein 662	Metagenome unknown	root	1	3	contig281000060_7, contig139293000061_22	ALVYDPQILLLDEPLANLDAK		MP_MPAv1_NewWF_BGP_1_A.csv
	MP_MPAv1_NewWF_BGP_1_A.csv	1545	Meta-Protein 663	Metagenome unknown	root	5	8	contig1396000055_5, contig19613000058_2, contig139849000029_129, B9KYR9, contig57367000077_1	FVLNPTLAEQAESDLEITIAGTK, ISGVTQLIMAEALEQAR, TGIDFFPLLVDYEER, YTILTDIQGIEDALGDMDFKYTILTDIQGLEDALGDMDFK		MP_MPAv1_NewWF_BGP_1_A.csv
	MP_MPAv1_NewWF_BGP_1_A.csv	1546	Meta-Protein 664	Metagenome unknown	root	1	2	contig1221000054_3, Q8TUH5	SVNEIMDILNNESEPLFLR		MP_MPAv1_NewWF_BGP_1_A.csv
	MP_MPAv1_NewWF_BGP_1_A.csv	1547	Meta-Protein 665	Metagenome unknown	root	17	62	contig20165000037_5, contig3779000008_1, contig9884000065_1, contig3158000050_3, contig17680000011_1, contig139479000027_5, contig2015000058_1, contig12488000022_1, ATB_S_contig127411, contig2029000002_9	AGDADAIYVGQQDLPQVK, AGDADAIYVGQQDLPQVR, DVIAMAGGPDDFVDISEVDPAILR, DVIAMAGGPDDFVDISEVDPAILRK, EQFDALIDAGIK, FDDYWQGPAALK, FHNGAELTAEDVKYSFLR, FQVDVIGLEWATVLDR, FQVEVIGLEWATVLDK, GPAALKNVVIK, GPFPQSLPYVNTEQEYFSHDLAK, KTALEILEFNIEQINPK, KTALEILEYNIER, LDGNGIPSDFFADVNVR, LYVEQAIAMPFMEATTHR, TALEILEFNIEQINPKWYDQALEEMTLYDK		MP_MPAv1_NewWF_BGP_1_A.csv
	MP_MPAv1_NewWF_BGP_1_A.csv	1548	Meta-Protein 666	Metagenome unknown	root	1	2	contig3311000068_2, contig139619000068_21	EMGVLAVEMEAAALYMNAAK		MP_MPAv1_NewWF_BGP_1_A.csv
	MP_MPAv1_NewWF_BGP_1_A.csv	1549	Meta-Protein 667	Metagenome unknown	root	5	8	contig791000004_37, contig138545000059_2, contig4_27, contig138958000071_24, contig6457000043_28, contig1717000052_3, contig22169000024_8, contig9000012_170, contig1359000078_3, contig115000066_13, contig95165000057_2, contig742000015_1, contig1083000015_12, contig14000019_9, contig154000002_31, contig139136000033_16	GTNHGPAPIPQEGKWVQAK, TIIEALNTDLVCDAINTAMR, TILEALNTDLVCDAINTAMR, TLLEALNTDLVCDAINTAMRTQSAFSEGGLPVGGGLEDLGK		MP_MPAv1_NewWF_BGP_1_A.csv
	MP_MPAv1_NewWF_BGP_1_A.csv	1550	Meta-Protein 668	Metagenome unknown	root	2	2	contig3875000033_1, contig3327000062_29, contig139063000047_8, contig3578000013_1, contig139564000048_263	EGIDFFPLIVDYEEREGIDFFPLLVDYEER		MP_MPAv1_NewWF_BGP_1_A.csv
	MP_MPAv1_NewWF_BGP_1_A.csv	1551	Meta-Protein 669	ATPA_SORBI ATP synthase subunit alpha, chloroplastic OS=Sorghum bicolor GN=atpA PE=3 SV=1	Poaceae	1	4	A1E9S1, Q6ENW6, P0C2Z5, A1EA05, A8Y9G7	IIGLGEIMSGELVEFAEGTR		MP_MPAv1_NewWF_BGP_1_A.csv
	MP_MPAv1_NewWF_BGP_1_A.csv	1552	Meta-Protein 670	Metagenome unknown	root	1	1	contig367000049_100, contig590000028_5	GSDDTLFALVDGVLR		MP_MPAv1_NewWF_BGP_1_A.csv
	MP_MPAv1_NewWF_BGP_1_A.csv	1553	Meta-Protein 671	Metagenome unknown	root	1	1	contig480000006_5, contig101000071_25	YLGGEYDLLVDIPTSVVNELK		MP_MPAv1_NewWF_BGP_1_A.csv
	MP_MPAv1_NewWF_BGP_1_A.csv	1554	Meta-Protein 672	Metagenome unknown	root	1	2	contig4464000032_5, contig1537000050_29	ALMMDPLTAAVCSLSEIK		MP_MPAv1_NewWF_BGP_1_A.csv
	MP_MPAv1_NewWF_BGP_1_A.csv	1555	Meta-Protein 673	Metagenome unknown	root	1	1	contig205000015_2, ATB_B_contig036353	YLDAEALLIGVIGDAGAGK		MP_MPAv1_NewWF_BGP_1_A.csv
	MP_MPAv1_NewWF_BGP_1_A.csv	1556	Meta-Protein 674	Metagenome unknown	root	59	126	contig31559000034_30, contig24640000038_1, A4XZ92, contig24729000044_1, contig139667000012_1, contig706000054_14, A4FPM7, A3PV96, A6TWI4, contig21716000064_1, contig139640000053_56, Q21SF0, Q5YPG4, contig125151000050_1, A1W2Q5, contig139669000053_1, contig56133000041_11, contig32561000063_1, contig99961000055_1, contig5964000026_1, contig3785000009_1, contig10686000076_1, Q3SSW8, contig4046100005…	ADMVDDEEIIELVEMEVR, ADMVDDEEILELVEMEVR, ADMVDDEELIELVEMEVR, ADMVDDEELLELVEMEVR, ADMVDDPELIELVEMEVR, ADMVDDPELLELVEMEVR, ATDKPFIMPVEDVFTITGR, ATDKPFLMPVEDVFTITGR, AVDKPFLMPVEDVFSITGR, DIDKPFLMPVEDVFSITGR, DTDKPFLMPVEDVFSITGR, DVAKPFLMPVEDVFTITGR, DVDKPFLMPVEDVFTITGR, ELLDFYNFDSTNTPVIR, ELLSEYDFPGDDIPVVSGSALK, ELLSEYEFPGDDIPIIK, ELLSEYEFPGDDIPILK, ELLSEYNFPGDDIPVIK, FEAEVYVLSK, FVGQVYVLK, GITINTSHV…		MP_MPAv1_NewWF_BGP_1_A.csv
	MP_MPAv1_NewWF_BGP_1_A.csv	1557	Meta-Protein 675	Metagenome unknown	root	1	1	contig13421000008_2, contig45016000037_3	GMDVVLIDDIVDTAGTITR		MP_MPAv1_NewWF_BGP_1_A.csv
	MP_MPAv1_NewWF_BGP_1_A.csv	1558	Meta-Protein 1580	Metagenome unknown	root	1	1	contig215000010_12	TIADIYEDIVDLAGVR		MP_MPAv1_NewWF_BGP_1_A.csv
	MP_MPAv1_NewWF_BGP_1_A.csv	1559	Meta-Protein 676	CYB6_SACOF Cytochrome b6 OS=Saccharum officinarum GN=petB PE=3 SV=1	Streptophyta	2	3	Q6ENT4, Q71KN3, Q6YXN2, Q0ZIY9, Q2L933, Q332U7, Q4VZI6	IVTGVPEAIPVIGSPLVEILRIVTGVPEAIPVIGSPLVELLR		MP_MPAv1_NewWF_BGP_1_A.csv
	MP_MPAv1_NewWF_BGP_1_A.csv	1560	Meta-Protein 677	Metagenome unknown	root	1	1	ATB_S_contig011231, contig817000036_7	EYIGELLEFLDSYTK		MP_MPAv1_NewWF_BGP_1_A.csv
	MP_MPAv1_NewWF_BGP_1_A.csv	1561	Meta-Protein 678	Metagenome unknown	root	1	2	contig638000056_3, contig543000027_55, contig4526000032_1, contig483000065_55	ISNIQEILPLLEQVVQSGAK		MP_MPAv1_NewWF_BGP_1_A.csv
	MP_MPAv1_NewWF_BGP_1_A.csv	1562	Meta-Protein 679	PSBB_SECCE Photosystem II CP47 reaction center protein OS=Secale cereale GN=psbB PE=3 SV=1	root	4	11	P09447, P0C363, contig9726000074_2, Q06GX1, Q09FT5, Q09G20, P0C362, P24065, Q32RQ6, P05641, A1E9V0	DVFAGIDPDLDAQVEFGTFQK, MPTFFETFPVVLVDEEGIVR, VSDGLAENLSLSEAWSKYQWDQGYFQQEIYR		MP_MPAv1_NewWF_BGP_1_A.csv
	MP_MPAv1_NewWF_BGP_1_A.csv	1563	Meta-Protein 680	Metagenome unknown	root	1	3	contig139434000027_10, contig136087000044_1, contig7996000020_3, contig139434000027_9	TIWQDFDDLMAEMESR		MP_MPAv1_NewWF_BGP_1_A.csv
	MP_MPAv1_NewWF_BGP_1_A.csv	1564	Meta-Protein 681	Metagenome unknown	root	1	1	ATB_B_contig053521, contig66661000042_1	LPAAAQVELPILEIFDR		MP_MPAv1_NewWF_BGP_1_A.csv
	MP_MPAv1_NewWF_BGP_1_A.csv	1565	Meta-Protein 682	RECA_RHOJR Protein RecA OS=Rhodococcus jostii (strain RHA1) GN=recA PE=3 SV=1	root	2	1	Q0S1P9, contig138808000019_51	SGAIDILVVDSVAALVPRSGALDILVVDSVAALVPR		MP_MPAv1_NewWF_BGP_1_A.csv
	MP_MPAv1_NewWF_BGP_1_A.csv	1566	Meta-Protein 683	Metagenome unknown	root	1	2	contig43979000063_2, contig10252000074_2, contig137821000037_1, contig63973000010_3	DFTYIDDIIEGVVR		MP_MPAv1_NewWF_BGP_1_A.csv
	MP_MPAv1_NewWF_BGP_1_A.csv	1567	Meta-Protein 684	Metagenome unknown	root	4	4	contig139340000021_19, contig115000051_1, contig15132000019_9, contig8438000031_53, contig6374000001_3, contig139186000073_66, contig558000076_2, contig1086000048_1, contig120000025_82, contig139442000027_14, contig139165000073_108, contig139566000068_35, contig426000048_7	SGAIDVIVIDSVAALVPR, SGAIDVIVLDSVAALVPR, SGAIDVLVIDSVAALVPRSGALDVIVIDSVAALVPR		MP_MPAv1_NewWF_BGP_1_A.csv
	MP_MPAv1_NewWF_BGP_1_A.csv	1568	Meta-Protein 685	Metagenome unknown	root	1	1	contig2696000035_3, ATB_S_contig121771	ISADSVESLIVEAASQIPGVQQVR		MP_MPAv1_NewWF_BGP_1_A.csv
	MP_MPAv1_NewWF_BGP_1_A.csv	1569	Meta-Protein 686	Metagenome unknown	root	2	4	contig2997000049_1, contig1082000022_2	DIEQLWIDQFDWMYRWATLEEMADWFLAK		MP_MPAv1_NewWF_BGP_1_A.csv
	MP_MPAv1_NewWF_BGP_1_A.csv	1570	Meta-Protein 1581	Metagenome unknown	root	1	1	contig25563000019_2	EAYVVTQILEAIYESAK		MP_MPAv1_NewWF_BGP_1_A.csv
	MP_MPAv1_NewWF_BGP_1_A.csv	1571	Meta-Protein 687	Metagenome unknown	root	1	2	contig50230000023_2, contig138682000063_1	ATDLPFLMPVEDVFSITGR		MP_MPAv1_NewWF_BGP_1_A.csv
	MP_MPAv1_NewWF_BGP_1_A.csv	1572	Meta-Protein 688	Metagenome unknown	root	2	4	contig139031000017_12, contig139211000058_1, contig201000059_84	ILEQDPFETIDQEGVGILVDMAVKVFGDAVNPLLVSVR		MP_MPAv1_NewWF_BGP_1_A.csv
	MP_MPAv1_NewWF_BGP_1_A.csv	1573	Meta-Protein 689	Metagenome unknown	root	4	11	contig3584000068_2, ATB_S_contig137461, contig138368000066_8, contig138688000035_6	AGLQPLGEQYLSDLEQAFR, DGWIDWLENR, GWIEEIPELAVYRYFGDDIVVDELIAMEWAR		MP_MPAv1_NewWF_BGP_1_A.csv
	MP_MPAv1_NewWF_BGP_1_A.csv	1574	Meta-Protein 690	Metagenome unknown	root	1	1	contig51000076_5, contig139064000062_21, contig139674000036_126, contig138845000028_73	LLQEEVSFPLIAAFTVQEEVGLR		MP_MPAv1_NewWF_BGP_1_A.csv
	MP_MPAv1_NewWF_BGP_1_A.csv	1575	Meta-Protein 691	Metagenome unknown	root	14	29	contig76000007_120, contig139145000061_15, contig67000045_59, contig155000035_107, contig705000016_7, contig4836000021_1, contig4727000074_18, contig5966000004_4, contig10139000024_4, contig1206000054_24, contig3886000061_2, contig15665000030_47, contig139220000074_27, contig197000011_15, contig521000051_42, contig110000028_1, contig759000073_5, contig139160000040_23, contig274000074_10, contig99…	ANIDRLVGGAGEATIIAR, ANIDRLVGGAGEATILAR, GLDAGTAFEILSIDIADVDVGR, GLDSGTAFEILSIDIADVDVGR, LVGGAGEATIIAR, LVGGAGEATILAR, LVLDKGLDAGTAFEILSIDIADVDVGR, NVLEAVQMSVNPK, SGNLGVMDYYAMQNILADTR, VGEGIVTSVGSSASHADVLENPDVISK, VIETPIISAVAK, VIETPLISAVAK, VVEAEAEVPKAIAEALRVVEAEAEVPKALAEALR		MP_MPAv1_NewWF_BGP_1_A.csv
	MP_MPAv1_NewWF_BGP_1_A.csv	1576	Meta-Protein 1582	Metagenome unknown	root	1	1	contig139140000061_4	DLVEWIISLDSPTYR		MP_MPAv1_NewWF_BGP_1_A.csv
	MP_MPAv1_NewWF_BGP_1_A.csv	1577	Meta-Protein 692	Metagenome unknown	root	1	2	contig971000025_4, ATB_S_contig034643	YAIDMEALIETLMEGR		MP_MPAv1_NewWF_BGP_1_A.csv
	MP_MPAv1_NewWF_BGP_1_A.csv	1578	Meta-Protein 693	Metagenome unknown	root	1	2	contig139542000078_2, contig2178000066_9, contig139235000056_3	IEALELQNLFEVAEATAIAAEAR		MP_MPAv1_NewWF_BGP_1_A.csv
	MP_MPAv1_NewWF_BGP_1_A.csv	1579	Meta-Protein 694	Metagenome unknown	root	1	1	ATB_S_contig021652, contig4365000045_2	DQPVFPEPQALLSEAPLILGLDGAQK		MP_MPAv1_NewWF_BGP_1_A.csv
	MP_MPAv1_NewWF_BGP_1_A.csv	1580	Meta-Protein 695	PSBD_OENEH Photosystem II D2 protein OS=Oenothera elata subsp. hookeri GN=psbD PE=3 SV=2	Streptophyta	1	2	Q9MTN1, A4GGA2, Q06GR5	DLFDIMDDWLR		MP_MPAv1_NewWF_BGP_1_A.csv
	MP_MPAv1_NewWF_BGP_1_A.csv	1581	Meta-Protein 696	Metagenome unknown	root	1	3	contig372000071_3, contig372000071_4, contig44850000070_1, contig6338000011_1, contig238000037_1, contig139128000074_5	NAQDGISLIQTAEGALDEVSNMLVR		MP_MPAv1_NewWF_BGP_1_A.csv
	MP_MPAv1_NewWF_BGP_1_A.csv	1582	Meta-Protein 1583	Metagenome unknown	root	1	1	contig23704000018_3	DIDTLIYELFLK		MP_MPAv1_NewWF_BGP_1_A.csv
	MP_MPAv1_NewWF_BGP_1_A.csv	1583	Meta-Protein 697	Metagenome unknown	root	11	41	contig210000072_5, contig163000033_2, contig898000048_2, ATB_S_contig090581, contig139539000036_13, ATB_G30_contig011451, contig5812000027_2, contig138968000039_2, contig425000007_6, contig139045000003_103, contig19005000003_1, contig366000044_2, ATB_G5_contig003903, contig3401000002_14, contig139389000069_75, contig138077000009_24, contig139203000034_15, contig865000000_1, contig24196000000_94, …	FGNVTAVDNISLDIK, IHLFDKDTEEVIR, ILDIEHLLDR, ILDLEHLLDR, ILGIENLLDR, ILGLENLLDR, LLGIENLLDR, LQTTIIYVTHDQTEAMTMGDR, MLGIENLLDR, TFKVEIPAERVFLMDEPLSNLDAK		MP_MPAv1_NewWF_BGP_1_A.csv
	MP_MPAv1_NewWF_BGP_1_B.csv	1	Meta-Protein 643	Metagenome unknown	root	1	1	contig143000008_1	ITYSATDAAGNTGTK		MP_MPAv1_NewWF_BGP_1_B.csv
	MP_MPAv1_NewWF_BGP_1_B.csv	2	Meta-Protein 644	Metagenome unknown	root	1	2	contig297000063_8	AGSSHVIHLHGELMNAR		MP_MPAv1_NewWF_BGP_1_B.csv
	MP_MPAv1_NewWF_BGP_1_B.csv	3	Meta-Protein 645	Metagenome unknown	root	1	3	contig882000042_152	RPQIHPVAAEIVK		MP_MPAv1_NewWF_BGP_1_B.csv
	MP_MPAv1_NewWF_BGP_1_B.csv	4	Meta-Protein 1	Metagenome unknown	root	1	1	contig9350000029_2, contig4503000063_1	HVVKDGSAVVVPSGANHNVLNTSK		MP_MPAv1_NewWF_BGP_1_B.csv
	MP_MPAv1_NewWF_BGP_1_B.csv	5	Meta-Protein 646	Metagenome unknown	root	1	1	contig139340000007_8	AVLQIAHGMAEHSAR		MP_MPAv1_NewWF_BGP_1_B.csv
	MP_MPAv1_NewWF_BGP_1_B.csv	6	Meta-Protein 647	Metagenome unknown	root	3	6	contig5994000012_6	AAEIANLDVWEGK, ALFAHHIGDLGERHPVSKLIGEVEREVDGEK		MP_MPAv1_NewWF_BGP_1_B.csv
	MP_MPAv1_NewWF_BGP_1_B.csv	7	Meta-Protein 648	Metagenome unknown	root	3	3	contig9020000014_1	AHQAIQDAMQQNSYLQR, AVALDKDTFTTIAAARIQHHASQIDNYLEQR		MP_MPAv1_NewWF_BGP_1_B.csv
	MP_MPAv1_NewWF_BGP_1_B.csv	8	Meta-Protein 649	Metagenome unknown	root	1	1	contig138789000028_6	TVLGVLKNDNHVSR		MP_MPAv1_NewWF_BGP_1_B.csv
	MP_MPAv1_NewWF_BGP_1_B.csv	9	Meta-Protein 650	Metagenome unknown	root	4	12	contig47012000066_4	FHNYVQVYPAR, KMTAIGNQSQAVIDLHK, NSVISHYEILKSVDTFVQAIADAEALIGLEGVR		MP_MPAv1_NewWF_BGP_1_B.csv
	MP_MPAv1_NewWF_BGP_1_B.csv	10	Meta-Protein 651	Metagenome unknown	root	1	1	contig5561000053_8	VNHQVGTHNLANQGEGSTSNIMYTR		MP_MPAv1_NewWF_BGP_1_B.csv
	MP_MPAv1_NewWF_BGP_1_B.csv	11	Meta-Protein 652	Metagenome unknown	root	1	1	contig152000013_1	SLEHVNIGTIGHVDHGK		MP_MPAv1_NewWF_BGP_1_B.csv
	MP_MPAv1_NewWF_BGP_1_B.csv	12	Meta-Protein 653	Metagenome unknown	root	2	4	contig4470000000_1	LNEEVISIVRRGHNFTLNADFK		MP_MPAv1_NewWF_BGP_1_B.csv
	MP_MPAv1_NewWF_BGP_1_B.csv	13	Meta-Protein 654	Metagenome unknown	root	1	2	contig629000071_2	GQPKPAAAEPAVVQEVQKGEER		MP_MPAv1_NewWF_BGP_1_B.csv
	MP_MPAv1_NewWF_BGP_1_B.csv	14	Meta-Protein 655	Metagenome unknown	root	4	8	contig614000062_2	AGLPSIDSYSLQALQNER, DFQLDNMQDIILIR, DQVIDWLEEVINKRHELAFEGLR		MP_MPAv1_NewWF_BGP_1_B.csv
	MP_MPAv1_NewWF_BGP_1_B.csv	15	Meta-Protein 656	Metagenome unknown	root	1	1	contig5501000036_1	VGQVVSVHVIPRPHSDVEK		MP_MPAv1_NewWF_BGP_1_B.csv
	MP_MPAv1_NewWF_BGP_1_B.csv	16	Meta-Protein 657	EF1A_METLZ Elongation factor 1-alpha OS=Methanocorpusculum labreanum (strain ATCC 43576 / DSM 4855 / Z) GN=tuf PE=3 SV=1	Methanocorpusculum labreanum Z	1	1	A2STF0	AAAKPHMNLAVIGHIDHGK		MP_MPAv1_NewWF_BGP_1_B.csv
	MP_MPAv1_NewWF_BGP_1_B.csv	17	Meta-Protein 658	Metagenome unknown	root	1	1	contig1197000062_3	HIHMNSADAEAFGVK		MP_MPAv1_NewWF_BGP_1_B.csv
	MP_MPAv1_NewWF_BGP_1_B.csv	18	Meta-Protein 659	Metagenome unknown	root	4	7	contig139658000012_2	GVVGVEYFFAPK, LGHTNLYDREFVTK, VTDVMHVNATNIVLGGDYLMYRYYLDDQVAIR		MP_MPAv1_NewWF_BGP_1_B.csv
	MP_MPAv1_NewWF_BGP_1_B.csv	19	Meta-Protein 660	Metagenome unknown	root	1	1	contig139707000053_54	INQILHEHTGQPLDKIER		MP_MPAv1_NewWF_BGP_1_B.csv
	MP_MPAv1_NewWF_BGP_1_B.csv	20	Meta-Protein 661	Metagenome unknown	root	1	1	contig139165000000_13	VGLLNVGHEPGKGNQLAK		MP_MPAv1_NewWF_BGP_1_B.csv
	MP_MPAv1_NewWF_BGP_1_B.csv	21	Meta-Protein 662	Metagenome unknown	root	5	14	contig139742000078_5	AIFQGPAGYNVPEQVNMFK, ANPDTAAIFTLGPLGAIPTIK, FKLDPADYDTGR, GWVTQETAEIVELLVEQGYRVVVAIHQAGHVGLEAR		MP_MPAv1_NewWF_BGP_1_B.csv
	MP_MPAv1_NewWF_BGP_1_B.csv	22	Meta-Protein 663	Metagenome unknown	root	1	12	contig8244000033_3	VSIGEEIPHPNTAEHHIR		MP_MPAv1_NewWF_BGP_1_B.csv
	MP_MPAv1_NewWF_BGP_1_B.csv	23	Meta-Protein 664	Metagenome unknown	root	2	2	contig824000062_2	AKFPGAQHVPFSEEKKAAALILEHMK		MP_MPAv1_NewWF_BGP_1_B.csv
	MP_MPAv1_NewWF_BGP_1_B.csv	24	Meta-Protein 665	Metagenome unknown	root	1	1	contig331000038_3	AHPGVTVKDEITADTDGNYQTK		MP_MPAv1_NewWF_BGP_1_B.csv
	MP_MPAv1_NewWF_BGP_1_B.csv	25	Meta-Protein 666	ZEB2_MAIZE 16 kDa gamma-zein OS=Zea mays PE=1 SV=1	Zea mays	1	7	P08031	HQCSPAATPYGSPQCQALQQQCCHQIR		MP_MPAv1_NewWF_BGP_1_B.csv
	MP_MPAv1_NewWF_BGP_1_B.csv	26	Meta-Protein 2	Metagenome unknown	root	2	7	ATB_S_contig021951, contig139667000075_5	NALTNLESIAQAAGTSLQKVVHTEKAPAAIGPYSQAIK		MP_MPAv1_NewWF_BGP_1_B.csv
	MP_MPAv1_NewWF_BGP_1_B.csv	27	Meta-Protein 667	Metagenome unknown	root	3	4	contig6150000022_3	HRPTVLGLPVR, SAVVLQVQDGEFKSLGIDAPFLGGDTFEAPEFIEIGGK		MP_MPAv1_NewWF_BGP_1_B.csv
	MP_MPAv1_NewWF_BGP_1_B.csv	28	Meta-Protein 668	Metagenome unknown	root	1	1	contig138306000031_19	AAWLKDNGKPYTVEAAR		MP_MPAv1_NewWF_BGP_1_B.csv
	MP_MPAv1_NewWF_BGP_1_B.csv	29	Meta-Protein 3	Metagenome unknown	root	2	4	contig98097000020_20, contig10249000052_31	AAEPYKGVVIHGVSESTPPSKDGELYGIPFEAFLK		MP_MPAv1_NewWF_BGP_1_B.csv
	MP_MPAv1_NewWF_BGP_1_B.csv	30	Meta-Protein 669	Metagenome unknown	root	1	1	contig41712000062_2	ELGSAIYHFHAK		MP_MPAv1_NewWF_BGP_1_B.csv
	MP_MPAv1_NewWF_BGP_1_B.csv	31	Meta-Protein 670	CISY_RICSI Citrate synthase (Fragment) OS=Rickettsia sibirica GN=gltA PE=3 SV=1	Rickettsia sibirica	1	1	Q59778	IFILHADHEQNASTSTVR		MP_MPAv1_NewWF_BGP_1_B.csv
	MP_MPAv1_NewWF_BGP_1_B.csv	32	Meta-Protein 671	Metagenome unknown	root	5	7	contig42000075_13	AEAITMLDNVLENAK, DVPAGSWFYDYIR, ISDAVLDILGDGSYTSK, TPATDFEGHWARVAQAIGYISGYSANEFGPNDPITR		MP_MPAv1_NewWF_BGP_1_B.csv
	MP_MPAv1_NewWF_BGP_1_B.csv	33	Meta-Protein 4	Metagenome unknown	root	3	9	contig71746000006_4, contig35974000023_3	LICASGPTGGHLIRPSDGATPK, TSLLEDLIPKVGTIILATGYDIFPIEEK		MP_MPAv1_NewWF_BGP_1_B.csv
	MP_MPAv1_NewWF_BGP_1_B.csv	34	Meta-Protein 672	Metagenome unknown	root	3	3	contig139738000012_59	SHVLVCGGTGCSSSNSALIR, SVLEGDPHSVLEAMAIAGYAIGATKVLTEMAPEEVIQLVK		MP_MPAv1_NewWF_BGP_1_B.csv
	MP_MPAv1_NewWF_BGP_1_B.csv	35	Meta-Protein 673	Metagenome unknown	root	1	2	contig139685000053_1	GKPVADAMKEDLIR		MP_MPAv1_NewWF_BGP_1_B.csv
	MP_MPAv1_NewWF_BGP_1_B.csv	36	Meta-Protein 674	Metagenome unknown	root	6	19	contig526000052_1	AAGYDVVDLGR, AAGYDVVDLGRDVPVDEVVAAVEK, AIFEGEEDDVVEGLQK, DVPVDEVVAAVEK, IANFIKEHGDNIVKMIEIDPSSILVR		MP_MPAv1_NewWF_BGP_1_B.csv
	MP_MPAv1_NewWF_BGP_1_B.csv	37	Meta-Protein 675	Metagenome unknown	root	1	1	contig1833000058_1	GQPKPAAETAVVQEVQKGEER		MP_MPAv1_NewWF_BGP_1_B.csv
	MP_MPAv1_NewWF_BGP_1_B.csv	38	Meta-Protein 676	Metagenome unknown	root	1	2	contig13346000033_2	LKAQQILADSEER		MP_MPAv1_NewWF_BGP_1_B.csv
	MP_MPAv1_NewWF_BGP_1_B.csv	39	Meta-Protein 677	Metagenome unknown	root	2	4	contig139628000068_20	FMGVTQGSVLASELDKLLMQKPILEELEKK		MP_MPAv1_NewWF_BGP_1_B.csv
	MP_MPAv1_NewWF_BGP_1_B.csv	40	Meta-Protein 5	Metagenome unknown	root	1	1	contig107913000027_2, contig24229000029_1	GVNAHEHDEYTGHYVSEELMR		MP_MPAv1_NewWF_BGP_1_B.csv
	MP_MPAv1_NewWF_BGP_1_B.csv	41	Meta-Protein 678	Metagenome unknown	root	4	8	contig139021000050_21	FVGGNEQAVISPDSFK, KLAEVGEDHYDATFYK, PHYNYLLQTRWADDMFMVQNPICK		MP_MPAv1_NewWF_BGP_1_B.csv
	MP_MPAv1_NewWF_BGP_1_B.csv	42	Meta-Protein 679	Metagenome unknown	root	1	1	contig2111000054_3	LGMGLAASLDITDNMMLKNYAR		MP_MPAv1_NewWF_BGP_1_B.csv
	MP_MPAv1_NewWF_BGP_1_B.csv	43	Meta-Protein 6	Metagenome unknown	root	1	2	contig512000037_4, contig176000027_2	KYEYIHEAIMDEK		MP_MPAv1_NewWF_BGP_1_B.csv
	MP_MPAv1_NewWF_BGP_1_B.csv	44	Meta-Protein 680	Metagenome unknown	root	3	4	contig140125000023_2	SAQLEEGLGALVLR, SLNQQVSAHVSEYEAKVSTYTSLESGLSTLSTDLAAFK		MP_MPAv1_NewWF_BGP_1_B.csv
	MP_MPAv1_NewWF_BGP_1_B.csv	45	Meta-Protein 7	Metagenome unknown	root	1	2	contig138728000006_14, contig47672000035_3	HTDTAQVADIHLQVK		MP_MPAv1_NewWF_BGP_1_B.csv
	MP_MPAv1_NewWF_BGP_1_B.csv	46	Meta-Protein 681	Metagenome unknown	root	1	1	contig1068000023_37	LKPHVFYVDEGSQTVR		MP_MPAv1_NewWF_BGP_1_B.csv
	MP_MPAv1_NewWF_BGP_1_B.csv	47	Meta-Protein 682	Metagenome unknown	root	1	1	contig844000058_12	STHYALEAEKIHAQMYDTAK		MP_MPAv1_NewWF_BGP_1_B.csv
	MP_MPAv1_NewWF_BGP_1_B.csv	48	Meta-Protein 683	Metagenome unknown	root	1	2	contig3554000012_1	NAFYDKAEKPVIVGGR		MP_MPAv1_NewWF_BGP_1_B.csv
	MP_MPAv1_NewWF_BGP_1_B.csv	49	Meta-Protein 8	Metagenome unknown	root	1	1	contig52271000024_1, contig59503000001_3	YSISREEQDQFALESHQK		MP_MPAv1_NewWF_BGP_1_B.csv
	MP_MPAv1_NewWF_BGP_1_B.csv	50	Meta-Protein 684	Metagenome unknown	root	1	3	contig2027000050_1	HAYGDIYKDVEMK		MP_MPAv1_NewWF_BGP_1_B.csv
	MP_MPAv1_NewWF_BGP_1_B.csv	51	Meta-Protein 685	Metagenome unknown	root	5	10	contig49000026_1	DAFVEATQQFMGIK, EAQIGYSNVTGNLPTTK, SEIYGMPWFTETR, SVFKEQMQFAKVWDNAMEIGGAYSFETTK		MP_MPAv1_NewWF_BGP_1_B.csv
	MP_MPAv1_NewWF_BGP_1_B.csv	52	Meta-Protein 686	Metagenome unknown	root	1	1	contig15577000056_1	HTVGFQGGNDQGSYYAAVNHVK		MP_MPAv1_NewWF_BGP_1_B.csv
	MP_MPAv1_NewWF_BGP_1_B.csv	53	Meta-Protein 687	Metagenome unknown	root	1	1	contig139484000014_4	TLVGRPGSTITVPK		MP_MPAv1_NewWF_BGP_1_B.csv
	MP_MPAv1_NewWF_BGP_1_B.csv	54	Meta-Protein 688	Metagenome unknown	root	1	1	contig139615000068_17	YVSSALTLNDVKK		MP_MPAv1_NewWF_BGP_1_B.csv
	MP_MPAv1_NewWF_BGP_1_B.csv	55	Meta-Protein 689	Metagenome unknown	root	2	3	contig1416000046_5	AIGISGIEELFSDIPSEVKLDRRQEIIISQAVHPEYR		MP_MPAv1_NewWF_BGP_1_B.csv
	MP_MPAv1_NewWF_BGP_1_B.csv	56	Meta-Protein 690	Metagenome unknown	root	1	1	contig4000023_15	HYTPETNYAYFNTMKK		MP_MPAv1_NewWF_BGP_1_B.csv
	MP_MPAv1_NewWF_BGP_1_B.csv	57	Meta-Protein 691	Metagenome unknown	root	3	8	contig109257000025_4	FAITSGSGEQILQTDILPK, KVGEAYELLRLADKYFAPGEEGQIAALVALDEAMAK		MP_MPAv1_NewWF_BGP_1_B.csv
	MP_MPAv1_NewWF_BGP_1_B.csv	58	Meta-Protein 692	Metagenome unknown	root	1	1	contig129517000039_7	VFQTLHTAAAIER		MP_MPAv1_NewWF_BGP_1_B.csv
	MP_MPAv1_NewWF_BGP_1_B.csv	59	Meta-Protein 693	Metagenome unknown	root	1	1	ATB_S_contig079322	AVGESVEKPLAYYK		MP_MPAv1_NewWF_BGP_1_B.csv
	MP_MPAv1_NewWF_BGP_1_B.csv	60	Meta-Protein 694	Metagenome unknown	root	1	1	contig2693000022_16	MKEVVIVSAVR		MP_MPAv1_NewWF_BGP_1_B.csv
	MP_MPAv1_NewWF_BGP_1_B.csv	61	Meta-Protein 695	Metagenome unknown	root	1	1	contig5950000043_5	GITINSSHIEYETENR		MP_MPAv1_NewWF_BGP_1_B.csv
	MP_MPAv1_NewWF_BGP_1_B.csv	62	Meta-Protein 696	Metagenome unknown	root	1	2	contig107000061_18	LKVLTSSTDNSPSSFTK		MP_MPAv1_NewWF_BGP_1_B.csv
	MP_MPAv1_NewWF_BGP_1_B.csv	63	Meta-Protein 697	Metagenome unknown	root	1	1	contig408000008_2	SHSESITIETEEEITPEKAR		MP_MPAv1_NewWF_BGP_1_B.csv
	MP_MPAv1_NewWF_BGP_1_B.csv	64	Meta-Protein 698	Metagenome unknown	root	1	1	contig139685000013_6	GELVTLVKEER		MP_MPAv1_NewWF_BGP_1_B.csv
	MP_MPAv1_NewWF_BGP_1_B.csv	65	Meta-Protein 699	Metagenome unknown	root	5	21	contig4160000071_24	GNELVEQLLEDYSVIIK, ILMVGQRPSASLK, LEEMYDFVAEQIDEVAER, LQEADSVAIRGNELVEQLLEDYSVIIKVADQLDVYLADLHVLYTK		MP_MPAv1_NewWF_BGP_1_B.csv
	MP_MPAv1_NewWF_BGP_1_B.csv	66	Meta-Protein 700	Metagenome unknown	root	1	1	contig5910000016_2	RYAGVSHLNVAELDDAK		MP_MPAv1_NewWF_BGP_1_B.csv
	MP_MPAv1_NewWF_BGP_1_B.csv	67	Meta-Protein 701	Metagenome unknown	root	1	1	contig3573000046_1	KVVVGHWQDAEVLK		MP_MPAv1_NewWF_BGP_1_B.csv
	MP_MPAv1_NewWF_BGP_1_B.csv	68	Meta-Protein 702	Metagenome unknown	root	1	1	contig2375000077_1	YRPVEIQPNNSSANTYTVR		MP_MPAv1_NewWF_BGP_1_B.csv
	MP_MPAv1_NewWF_BGP_1_B.csv	69	Meta-Protein 703	Metagenome unknown	root	4	6	contig203000016_1	KPNVAYNQAGYAPDFSK, NNTQDGWFIVR, VALIELDPFYDAPITAYIDRWIVVGSAADAIVNR		MP_MPAv1_NewWF_BGP_1_B.csv
	MP_MPAv1_NewWF_BGP_1_B.csv	70	Meta-Protein 704	Metagenome unknown	root	1	2	contig139724000004_11	LICASGPTGGHLIRPSDGVTPK		MP_MPAv1_NewWF_BGP_1_B.csv
	MP_MPAv1_NewWF_BGP_1_B.csv	71	Meta-Protein 705	Metagenome unknown	root	3	4	contig313000059_10	AYEVMDGETGQQILASLEPLNIK, EFQVFDLPFIITDKDRLGFSTEPDSHYGKGSAEFER		MP_MPAv1_NewWF_BGP_1_B.csv
	MP_MPAv1_NewWF_BGP_1_B.csv	72	Meta-Protein 706	Metagenome unknown	root	16	44	contig2438000017_48	AVSFVTEHLQGLVDK, AVSFVTEHLQGLVDKSTTSNDFSK, DVLTTLGDTGNAVWK, GIPGPLEQSLIGSK, IDGTAVPAGSSYLAAIPEK, IFTSGVVSGNLEYLK, INPVGDVDYTNPIGIYHMGR, LHEAIALIAGR, LSTYYLEVMDFVSK, MPGSASLYPGGYTYPATVADITK, NNQGMGLWEAPR, RLHEAIALIAGR, VNVTVDPLTR, VPFDTWIENTYK, VSTEVDANGVITDAQSSSLIFRYDGIPGEVGPLAR		MP_MPAv1_NewWF_BGP_1_B.csv
	MP_MPAv1_NewWF_BGP_1_B.csv	73	Meta-Protein 707	Metagenome unknown	root	1	1	contig94000002_4	KAPILIQTSMGAAK		MP_MPAv1_NewWF_BGP_1_B.csv
	MP_MPAv1_NewWF_BGP_1_B.csv	74	Meta-Protein 708	Metagenome unknown	root	1	1	contig4055000011_3	ASMPKPENESDYLYR		MP_MPAv1_NewWF_BGP_1_B.csv
	MP_MPAv1_NewWF_BGP_1_B.csv	75	Meta-Protein 9	Metagenome unknown	root	15	43	contig27946000077_1, contig139509000048_5	ADPINDNYTGWVLLSLDK, ADPINDNYTGWVLLSLDKR, ASVVWEPVPGAEGYVVR, EYRPEEYGWTEGGHPLK, FSSTNYGDAAMLYDEETGR, GDTLIQLFPTGVDEEGVMHGK, GGEPVITMFEDDYYLFVSMQR, KASVVWEPVPGAEGYVVR, SFIQNPTTYCNPISLTQGSGR, TDYIELPTSVHAR, VETSSTLENYWPAFAVDEDAK, VEYGDYPQYLPGVK, VFGNPEEATFTK, VFGNPEEATFTKVENVTAVRYSDDLIFPYFDHR		MP_MPAv1_NewWF_BGP_1_B.csv
	MP_MPAv1_NewWF_BGP_1_B.csv	76	Meta-Protein 709	Metagenome unknown	root	1	1	contig138774000006_15	KVLTEIQDGTFAK		MP_MPAv1_NewWF_BGP_1_B.csv
	MP_MPAv1_NewWF_BGP_1_B.csv	77	Meta-Protein 710	Metagenome unknown	root	3	11	contig719000070_1	LAEWHEEGIYHYGGR, NVIEEELEAIFAGAKVAIDQLNYSPPTSDTR		MP_MPAv1_NewWF_BGP_1_B.csv
	MP_MPAv1_NewWF_BGP_1_B.csv	78	Meta-Protein 711	Metagenome unknown	root	1	1	contig139284000077_2	HLNYSPEPVTEIR		MP_MPAv1_NewWF_BGP_1_B.csv
	MP_MPAv1_NewWF_BGP_1_B.csv	79	Meta-Protein 712	Metagenome unknown	root	1	2	contig104000012_22	LEHTIANADNTAENLQAAESR		MP_MPAv1_NewWF_BGP_1_B.csv
	MP_MPAv1_NewWF_BGP_1_B.csv	80	Meta-Protein 10	Metagenome unknown	root	1	4	contig121868000079_1, contig22228000054_4	MREIFEAQNPNIK		MP_MPAv1_NewWF_BGP_1_B.csv
	MP_MPAv1_NewWF_BGP_1_B.csv	81	Meta-Protein 713	Metagenome unknown	root	4	14	contig165000036_3	GTAYNYYDGTAWGTQISR, GTGTLADRGTAYNYYDGTAWGTQISR, IFHNQPIGNTEYDIQSNKIYLYPDGTIGATWIR		MP_MPAv1_NewWF_BGP_1_B.csv
	MP_MPAv1_NewWF_BGP_1_B.csv	82	Meta-Protein 714	Metagenome unknown	root	1	1	contig704000026_2	YGVEFAGGQGIHAGR		MP_MPAv1_NewWF_BGP_1_B.csv
	MP_MPAv1_NewWF_BGP_1_B.csv	83	Meta-Protein 715	Metagenome unknown	root	1	3	contig97935000027_2	TQFGKPIAANQMIQEK		MP_MPAv1_NewWF_BGP_1_B.csv
	MP_MPAv1_NewWF_BGP_1_B.csv	84	Meta-Protein 716	Metagenome unknown	root	1	1	contig138932000003_4	TPDGEFKDIAHPINTSAR		MP_MPAv1_NewWF_BGP_1_B.csv
	MP_MPAv1_NewWF_BGP_1_B.csv	85	Meta-Protein 717	Metagenome unknown	root	1	3	contig138510000043_9	LHEVFDTYGPAIKR		MP_MPAv1_NewWF_BGP_1_B.csv
	MP_MPAv1_NewWF_BGP_1_B.csv	86	Meta-Protein 718	Metagenome unknown	root	1	1	contig29057000024_1	IAIPANKVEENPAIK		MP_MPAv1_NewWF_BGP_1_B.csv
	MP_MPAv1_NewWF_BGP_1_B.csv	87	Meta-Protein 719	Metagenome unknown	root	1	1	contig139944000004_25	AGAGGSGAGCIASVLFGHILK		MP_MPAv1_NewWF_BGP_1_B.csv
	MP_MPAv1_NewWF_BGP_1_B.csv	88	Meta-Protein 720	Metagenome unknown	root	1	1	contig582000077_5	IFAETNVKPHQVAAIGVTNQR		MP_MPAv1_NewWF_BGP_1_B.csv
	MP_MPAv1_NewWF_BGP_1_B.csv	89	Meta-Protein 721	Metagenome unknown	root	1	1	contig2365000072_7	YVDKIEAPDDYTVK		MP_MPAv1_NewWF_BGP_1_B.csv
	MP_MPAv1_NewWF_BGP_1_B.csv	90	Meta-Protein 722	Metagenome unknown	root	1	1	contig139671000053_2	LNHPHGMAVNEDGEIFVANK		MP_MPAv1_NewWF_BGP_1_B.csv
	MP_MPAv1_NewWF_BGP_1_B.csv	91	Meta-Protein 723	Metagenome unknown	root	1	3	contig105000065_34	NIVLEGFQSFNSK		MP_MPAv1_NewWF_BGP_1_B.csv
	MP_MPAv1_NewWF_BGP_1_B.csv	92	Meta-Protein 11	RL1_CLOPS 50S ribosomal protein L1 OS=Clostridium perfringens (strain SM101 / Type A) GN=rplA PE=3 SV=1	root	2	2	Q0SQD3, contig138370000066_41, contig470000012_21	AKFDETIEIHVRAKFDETIELHVR		MP_MPAv1_NewWF_BGP_1_B.csv
	MP_MPAv1_NewWF_BGP_1_B.csv	93	Meta-Protein 724	DYH3_HUMAN Dynein heavy chain 3, axonemal OS=Homo sapiens GN=DNAH3 PE=2 SV=1	Homo sapiens	1	1	Q8TD57	QSGGSGKSPQEVVEELAQDILSK		MP_MPAv1_NewWF_BGP_1_B.csv
	MP_MPAv1_NewWF_BGP_1_B.csv	94	Meta-Protein 725	Metagenome unknown	root	1	1	contig95511000029_3	VGEINFHANIPATDRR		MP_MPAv1_NewWF_BGP_1_B.csv
	MP_MPAv1_NewWF_BGP_1_B.csv	95	Meta-Protein 12	Metagenome unknown	root	6	8	contig297000063_9, contig139576000012_4	ESELLALLCAHANDILER, KLLKPDPNIEIINIHGK, NMKEDVIEGFK, NMKEDVLEGFK, SINSEIPVIFLTAKVGADDYITKPFSMEELVFR		MP_MPAv1_NewWF_BGP_1_B.csv
	MP_MPAv1_NewWF_BGP_1_B.csv	96	Meta-Protein 726	Metagenome unknown	root	1	3	contig139021000050_8	MFAHSYVDAETIK		MP_MPAv1_NewWF_BGP_1_B.csv
	MP_MPAv1_NewWF_BGP_1_B.csv	97	Meta-Protein 727	Metagenome unknown	root	8	14	contig367000049_80	FFEAAEELKQK, FKELYPDEFPYEIK, GYAIISGDGDLWHAVENSSDQGWVVDGK, NLTQYDETINKVWR, REEFFDLSK, SIAKDVWGTDDPEVIKGK, TFNIYAFTDEVPNMIKTFNIYAFTDEVPNMIKK		MP_MPAv1_NewWF_BGP_1_B.csv
	MP_MPAv1_NewWF_BGP_1_B.csv	98	Meta-Protein 13	Metagenome unknown	root	3	8	contig139290000061_8, contig18625000019_2	ALDATLDAIADELK, ALDATLDAIADELKSGGKMNKSELVDAIAQK		MP_MPAv1_NewWF_BGP_1_B.csv
	MP_MPAv1_NewWF_BGP_1_B.csv	99	Meta-Protein 728	Metagenome unknown	root	1	1	contig506000036_36	ITLRPSGFTDSQGNQTVR		MP_MPAv1_NewWF_BGP_1_B.csv
	MP_MPAv1_NewWF_BGP_1_B.csv	100	Meta-Protein 729	Metagenome unknown	root	1	1	contig97751000059_1	KAQLYPIGLR		MP_MPAv1_NewWF_BGP_1_B.csv
	MP_MPAv1_NewWF_BGP_1_B.csv	101	Meta-Protein 14	OTC_ALKMQ Ornithine carbamoyltransferase OS=Alkaliphilus metalliredigens (strain QYMF) GN=argF PE=3 SV=1	root	1	1	A6TWW1, contig460000050_7	HSVVFDEAENRLHTIK		MP_MPAv1_NewWF_BGP_1_B.csv
	MP_MPAv1_NewWF_BGP_1_B.csv	102	Meta-Protein 730	Metagenome unknown	root	20	86	contig139045000003_41	AGFEVGPLSLDGAYSNTAK, DEDLAVVAYILTANK, DLVEEGEVADPTVLTHK, EAELTEEDVELIAQELIAQQVQK, ETKDEDLAVVAYILTANK, FDILPELDR, FYRETKDEDLAVVAYILTANK, GAALDLGYNAELK, GAALDLGYNAELKK, ITDGAFDPWK, ITDGAFDPWKVK, KVPTVKPEATAVGAGIYGDIGK, LIVDAFTEDIAELNER, LNYGADIAMDLGEEEDNTRFDLK, TTDGGLTYGASAAYER, VAALEAAQADVATKEEVAAVQADVDAVK, VAALEAAQADVATKEEVAAVQADVDAVKADVK, VFDLGALPITVDAR, VPTVKPEATAVGAGIYGDIGKYASAVTDPDDDDNPVANTLVK		MP_MPAv1_NewWF_BGP_1_B.csv
	MP_MPAv1_NewWF_BGP_1_B.csv	103	Meta-Protein 731	Metagenome unknown	root	1	5	contig32430000069_1	YPIPSIGADEVELLPINLK		MP_MPAv1_NewWF_BGP_1_B.csv
	MP_MPAv1_NewWF_BGP_1_B.csv	104	Meta-Protein 732	Metagenome unknown	root	13	49	contig2999000006_3	AIYEGKSEYNADVLGR, ATQFGWISAPK, DGDNKPGITLTGFYR, GESEDRVDWEFSSGVK, GQTDVTAAATYTEAAFQLK, IGDTGPSVTFGAETK, LFVDGAVEGYNVGAAYELAK, LGLYDQYFK, LTIDATAPVVADVASVK, SRVEVPVADVATVTADFEGTTMR, TDVTAAATYTEAAFQLK, VEVPVADVATVTADFEGTTMRVVVQADGSIPAGDLDIALK		MP_MPAv1_NewWF_BGP_1_B.csv
	MP_MPAv1_NewWF_BGP_1_B.csv	105	Meta-Protein 733	Metagenome unknown	root	1	2	contig164000074_2	MNKEELITAMAK		MP_MPAv1_NewWF_BGP_1_B.csv
	MP_MPAv1_NewWF_BGP_1_B.csv	106	Meta-Protein 15	Metagenome unknown	root	1	3	contig60537000028_6, contig139644000012_14, contig139077000045_16	MNKAELVASIAEK		MP_MPAv1_NewWF_BGP_1_B.csv
	MP_MPAv1_NewWF_BGP_1_B.csv	107	Meta-Protein 16	MTRH_METAC Tetrahydromethanopterin S-methyltransferase subunit H OS=Methanosarcina acetivorans (strain ATCC 35395 / DSM 2834 / JCM 12185 / C2A) GN=mtrH PE=3 SV=1	root	13	22	Q8TU06, P80650, O93716, contig139803000041_1	AAAENLWNTQVSLSDETGLPYVNQIVGETPESIKR, ELGIEIADLADHPVTK, FDKKQEVFEIGGVK, FDKKQEVFELGGVK, FGGQPGEYPTVLVSTMFYAR, GKIDILEVGGSGQTK, GKLDILEVGGSGQTK, IDILEVGGSGQTK, KQEVFEIGGVK, KQEVFELGGVK, LDILEVGGSGQTK, TPFLIDSSAGNVRYIDWFVEIDDRTPFLIDSSAGNVR		MP_MPAv1_NewWF_BGP_1_B.csv
	MP_MPAv1_NewWF_BGP_1_B.csv	108	Meta-Protein 734	Metagenome unknown	root	1	1	contig608000075_3	VVAERLECYDDQTVAYNK		MP_MPAv1_NewWF_BGP_1_B.csv
	MP_MPAv1_NewWF_BGP_1_B.csv	109	Meta-Protein 735	Metagenome unknown	root	2	6	contig1163000018_1	NGGLASGGLNFDAKPRQELLEAIVNQYILDGLSK		MP_MPAv1_NewWF_BGP_1_B.csv
	MP_MPAv1_NewWF_BGP_1_B.csv	110	Meta-Protein 736	Metagenome unknown	root	1	1	contig139172000010_3	ILQQEKPQDYVLATNETHTVR		MP_MPAv1_NewWF_BGP_1_B.csv
	MP_MPAv1_NewWF_BGP_1_B.csv	111	Meta-Protein 737	Metagenome unknown	root	1	2	contig2626000004_7	AAAAGEHEEWAHDYPEFAR		MP_MPAv1_NewWF_BGP_1_B.csv
	MP_MPAv1_NewWF_BGP_1_B.csv	112	Meta-Protein 738	IF2G_THEVO Translation initiation factor 2 subunit gamma OS=Thermoplasma volcanium (strain ATCC 51530 / DSM 4299 / JCM 9571 / NBRC 15438 / GSS1) GN=eif2g PE=3 SV=1	Thermoplasma volcanium GSS1	1	1	Q978W8	YSYDMIKPGGLAAVGTK		MP_MPAv1_NewWF_BGP_1_B.csv
	MP_MPAv1_NewWF_BGP_1_B.csv	113	Meta-Protein 739	Metagenome unknown	root	1	1	contig13006000021_1	LEHTINNLSTSSENLTAAESR		MP_MPAv1_NewWF_BGP_1_B.csv
	MP_MPAv1_NewWF_BGP_1_B.csv	114	Meta-Protein 740	Metagenome unknown	root	4	10	contig106788000030_4	IVDDDQLQISFEK, TLLLPDNVDKEK, VPAINIIENENEFLVEVAAPGLTKVPAINIIENENEFLVEVAAPGLTKDDFK		MP_MPAv1_NewWF_BGP_1_B.csv
	MP_MPAv1_NewWF_BGP_1_B.csv	115	Meta-Protein 741	Metagenome unknown	root	3	4	contig139611000012_1	IGNDIYSDLMYDALK, SAQPIEAAYSHDPSFARSKHFLEMPSELTGGEAK		MP_MPAv1_NewWF_BGP_1_B.csv
	MP_MPAv1_NewWF_BGP_1_B.csv	116	Meta-Protein 742	Metagenome unknown	root	4	5	contig66257000008_1	AAFSGGSNLAILAGTKAEEDAK, AIFTDYVTGQLGEDGVKK, ATFNSPEGIDAMNWYVDLVRHLDDAAQKVDAALAQEK		MP_MPAv1_NewWF_BGP_1_B.csv
	MP_MPAv1_NewWF_BGP_1_B.csv	117	Meta-Protein 743	Metagenome unknown	root	1	1	contig138660000035_27	NAMGGVAGGLGNIPGLF		MP_MPAv1_NewWF_BGP_1_B.csv
	MP_MPAv1_NewWF_BGP_1_B.csv	118	Meta-Protein 744	Metagenome unknown	root	1	3	contig2438000017_49	ISHFTDHYIFGPK		MP_MPAv1_NewWF_BGP_1_B.csv
	MP_MPAv1_NewWF_BGP_1_B.csv	119	Meta-Protein 745	Metagenome unknown	root	11	17	contig4517000032_1	DMNAGVVVNPLDALK, HRIDALALVEGQK, IDGSQLLFDNK, ISFGGGTAETNFR, LLSLSGTYMGQELNAAEYMK, LTIDDREDNAYLATNSR, NMFDVGVDMAFMNR, QAVIDGGYVNALDGGASTNFMK, SKDMDLTISGNVAYQK, TEDLLYDYDVPVPPFVHPKTINMLSAEGYR		MP_MPAv1_NewWF_BGP_1_B.csv
	MP_MPAv1_NewWF_BGP_1_B.csv	120	Meta-Protein 746	Metagenome unknown	root	1	1	contig8188000030_2	MNKSELVAAIAEK		MP_MPAv1_NewWF_BGP_1_B.csv
	MP_MPAv1_NewWF_BGP_1_B.csv	121	Meta-Protein 747	Metagenome unknown	root	8	26	contig276000044_3	AFVDVYAVENFDIR, ANYLIGSSSTALK, ANYLIGSSSTALKFEAEK, ASFDADKDVVASVLAR, FGMISAADAAPATGMR, FTATAEMDSFK, LATDADKNTNFALGSYKLTVLPFAQYEYNLDTEVSK		MP_MPAv1_NewWF_BGP_1_B.csv
	MP_MPAv1_NewWF_BGP_1_B.csv	122	Meta-Protein 748	Metagenome unknown	root	2	3	contig1093000005_65	EAGATAAQEIAFTLADGIAYVDAAIKEIHNSAYQYQLAIDNK		MP_MPAv1_NewWF_BGP_1_B.csv
	MP_MPAv1_NewWF_BGP_1_B.csv	123	Meta-Protein 17	Metagenome unknown	root	3	8	contig10499000073_2, contig186000026_4	ACEMLADAGIPLGNQAVLLR, AYFNATEEEWNDWRGKTPMLPEYVISHGR		MP_MPAv1_NewWF_BGP_1_B.csv
	MP_MPAv1_NewWF_BGP_1_B.csv	124	Meta-Protein 749	Metagenome unknown	root	3	5	contig580000049_51	AQANIDKSVNYLVQEFER, LMVEEAIDAKSVNYLVQEFER		MP_MPAv1_NewWF_BGP_1_B.csv
	MP_MPAv1_NewWF_BGP_1_B.csv	125	Meta-Protein 750	Metagenome unknown	root	2	4	contig889000014_1	AANTADQPNNVVPHLGGNAQISEGKNLEGGLEFTGDLR		MP_MPAv1_NewWF_BGP_1_B.csv
	MP_MPAv1_NewWF_BGP_1_B.csv	126	Meta-Protein 751	Metagenome unknown	root	3	5	contig139623000075_21	LVLDSDDRYTIR, QVDVEGEKVWLEFTKTGETLDLGEGYALEAK		MP_MPAv1_NewWF_BGP_1_B.csv
	MP_MPAv1_NewWF_BGP_1_B.csv	127	Meta-Protein 752	Metagenome unknown	root	1	3	contig137987000049_11	VNVNGGAIALGHPLGATGGR		MP_MPAv1_NewWF_BGP_1_B.csv
	MP_MPAv1_NewWF_BGP_1_B.csv	128	Meta-Protein 18	Metagenome unknown	root	6	8	contig8919000019_3, contig188000065_11, contig13524000077_4	ASIRDDNPVIFVEHK, ASIRDDNPVLFVEHK, MKELSVAEAIR, QGEDVTVVATSMMVYK, TGGFGGEIAAIVAEEGFDYLDAPIKRTLVPLDKDIILSSVEK		MP_MPAv1_NewWF_BGP_1_B.csv
	MP_MPAv1_NewWF_BGP_1_B.csv	129	Meta-Protein 753	Metagenome unknown	root	1	1	contig180000025_2	EVLNLPDFQGTSVMNECDGDVPYTR		MP_MPAv1_NewWF_BGP_1_B.csv
	MP_MPAv1_NewWF_BGP_1_B.csv	130	Meta-Protein 754	Metagenome unknown	root	7	15	contig526000052_2	AKNAAIECINIIEEGAKK, DMFVASDLNR, MAYSSADEMVFGR, SLVAYEAGAVGPGK, SLVAYEAGAVGPGKDCGYENTICK, TGLGLEIGAGYTIPEVNYAPRPEAGVSKTIMEDYHDEYGIK		MP_MPAv1_NewWF_BGP_1_B.csv
	MP_MPAv1_NewWF_BGP_1_B.csv	131	Meta-Protein 755	Metagenome unknown	root	4	12	contig139592000044_3	GLAYANFNPIEGLVYTSR, LSPISGESQSANPFIQR, SQDGQVFYNGQWQLSSLSRYINYLLDDAKK		MP_MPAv1_NewWF_BGP_1_B.csv
	MP_MPAv1_NewWF_BGP_1_B.csv	132	Meta-Protein 19	Metagenome unknown	root	1	5	contig23778000045_1, contig134273000055_4	AGFLDEKGELPR		MP_MPAv1_NewWF_BGP_1_B.csv
	MP_MPAv1_NewWF_BGP_1_B.csv	133	Meta-Protein 756	Metagenome unknown	root	8	16	contig139244000058_10	DLTNEHIDLIQK, EGVLDVLER, FIDTKDYNQTTYICER, ICGICSALHGVTYTR, IKGFPTGEAIMR, LADVPIVVLTIDPCISCTER, NTPDWDIYKDLGFKQLAYEAGTAGPTLR		MP_MPAv1_NewWF_BGP_1_B.csv
	MP_MPAv1_NewWF_BGP_1_B.csv	134	Meta-Protein 757	Metagenome unknown	root	1	2	contig26513000066_2	FEKGEGVVVIDGVSHAVK		MP_MPAv1_NewWF_BGP_1_B.csv
	MP_MPAv1_NewWF_BGP_1_B.csv	135	Meta-Protein 758	Metagenome unknown	root	4	10	contig139296000022_1	FYEDIPDVVESYMAEITK, LVDQEALEGFR, SAFYGKEDAPVIVGGRYIAENNIEFYTLNAVK		MP_MPAv1_NewWF_BGP_1_B.csv
	MP_MPAv1_NewWF_BGP_1_B.csv	136	Meta-Protein 759	Metagenome unknown	root	1	3	contig19088000047_1	IHFQTVQQTVDEGGPLKR		MP_MPAv1_NewWF_BGP_1_B.csv
	MP_MPAv1_NewWF_BGP_1_B.csv	137	Meta-Protein 760	Metagenome unknown	root	2	4	contig27000067_1	FNNVTVDIVPVNFEKTTVYTGNAVQITTSEGER		MP_MPAv1_NewWF_BGP_1_B.csv
	MP_MPAv1_NewWF_BGP_1_B.csv	138	Meta-Protein 761	Metagenome unknown	root	3	8	contig1563000070_2	DAVAMAISQVLQGWDIDSALR, DAVAMAISQVLQGWDIDSALREAEETVKISYGVYNYEAR		MP_MPAv1_NewWF_BGP_1_B.csv
	MP_MPAv1_NewWF_BGP_1_B.csv	139	Meta-Protein 762	Metagenome unknown	root	4	7	contig188000043_6	AAEIMVEFLK, ELAPEMEILPIR, IVAVAFDSDPEEIQALRTDKIHSFLATDNIEAGGK		MP_MPAv1_NewWF_BGP_1_B.csv
	MP_MPAv1_NewWF_BGP_1_B.csv	140	Meta-Protein 763	Metagenome unknown	root	1	1	ATB_G30_contig026823	AFTSPEGTASFTAR		MP_MPAv1_NewWF_BGP_1_B.csv
	MP_MPAv1_NewWF_BGP_1_B.csv	141	Meta-Protein 764	Metagenome unknown	root	1	1	contig758000061_1	EGDVLIGLPSSGLHSNGFSLVRK		MP_MPAv1_NewWF_BGP_1_B.csv
	MP_MPAv1_NewWF_BGP_1_B.csv	142	Meta-Protein 20	GLPK_NATTJ Glycerol kinase OS=Natranaerobius thermophilus (strain ATCC BAA-1301 / DSM 18059 / JW/NM-WN-LF) GN=glpK PE=3 SV=1	Clostridia	2	1	B2A2C4, Q8R8J4	ATLESIAYQTRATLESLAYQTR		MP_MPAv1_NewWF_BGP_1_B.csv
	MP_MPAv1_NewWF_BGP_1_B.csv	143	Meta-Protein 21	Metagenome unknown	root	2	3	contig1964000074_3, ATB_S_contig026631	NSHPAYDTIANEWRVILEDGMSTDINGPESVYITTK		MP_MPAv1_NewWF_BGP_1_B.csv
	MP_MPAv1_NewWF_BGP_1_B.csv	144	Meta-Protein 765	Metagenome unknown	root	3	12	contig2191000024_1	FFDAAEELKAK, NMTEFDEDINSFWRVGPGMDKFFDAAEELK		MP_MPAv1_NewWF_BGP_1_B.csv
	MP_MPAv1_NewWF_BGP_1_B.csv	145	Meta-Protein 766	Metagenome unknown	root	1	2	contig98635000034_4	GGYGVTGNQNFSPGVATR		MP_MPAv1_NewWF_BGP_1_B.csv
	MP_MPAv1_NewWF_BGP_1_B.csv	146	Meta-Protein 767	Metagenome unknown	root	1	1	contig139246000056_5	YDQEKENPSLELFNNAGHR		MP_MPAv1_NewWF_BGP_1_B.csv
	MP_MPAv1_NewWF_BGP_1_B.csv	147	Meta-Protein 22	Metagenome unknown	root	4	7	contig138641000032_78, contig58038000077_2	ITEDTAGALDDERESLKLR, NEWITLDLPAGVR, TLTLELPENARVSNINYIVDR		MP_MPAv1_NewWF_BGP_1_B.csv
	MP_MPAv1_NewWF_BGP_1_B.csv	148	Meta-Protein 23	Metagenome unknown	root	32	98	contig6226000040_1, contig62180000044_1, contig556000067_1	ADVADLRVDEIDATLAAHLAGHEK, ADYDLNENLNLWGDVNWAK, AEFAPIEASYYHTYAR, AEFITELDVLNAR, AELDPIEASYYHTYAR, AEYAPIEASYYHTYAR, AGAKAELDPIEASYYHTYAR, AGIADVGAEYELAFGDLK, AGIANVSAEYALEFGDLK, AGLAFDLNDVTIVWPK, ANYAIYEGVDLK, AWDDYLSGVVAPHEVR, AWDDYLSTIVDEQEVR, DGIEAGTFYNRDEVNAK, DLLVVGTPWTK, DLQIEGTPWTK, ENFDHVVSVSADYAFAEGWK, FYLEEGAYEQYK, HFYETAGAWQDGGNRVTVK, IQEASAATPWIWR, IREESAAVAEVPWK, ISGSSEVKFEDIDIR, ISG…		MP_MPAv1_NewWF_BGP_1_B.csv
	MP_MPAv1_NewWF_BGP_1_B.csv	149	Meta-Protein 24	Metagenome unknown	root	1	2	contig139244000058_54, contig580000049_56	VYETADIQATESAVR		MP_MPAv1_NewWF_BGP_1_B.csv
	MP_MPAv1_NewWF_BGP_1_B.csv	150	Meta-Protein 768	Metagenome unknown	root	2	2	contig910000005_1	ISDPFQGTHQIGVKVGEAGASELLINPFPR		MP_MPAv1_NewWF_BGP_1_B.csv
	MP_MPAv1_NewWF_BGP_1_B.csv	151	Meta-Protein 769	Metagenome unknown	root	4	5	contig2279000069_13	MWHSVSNTAEYGGMTVGPK, QASVYYSEIEPNLK, TADVIMILLPDEKTYTEGIGVPGLIAVYQDATGNAR		MP_MPAv1_NewWF_BGP_1_B.csv
	MP_MPAv1_NewWF_BGP_1_B.csv	152	Meta-Protein 770	Metagenome unknown	root	1	1	contig180000052_10	AAEALMAADPTIDALIPAGGGGD		MP_MPAv1_NewWF_BGP_1_B.csv
	MP_MPAv1_NewWF_BGP_1_B.csv	153	Meta-Protein 771	Metagenome unknown	root	1	2	contig2870000032_14	YYVGGVSMVR		MP_MPAv1_NewWF_BGP_1_B.csv
	MP_MPAv1_NewWF_BGP_1_B.csv	154	Meta-Protein 772	Metagenome unknown	root	5	7	contig85000049_7	EAFNWLIDR, IWLVDVAGANPYR, SDSPPNPAAGNYVADLVEDVLGFEVER, TVVHYPDNLYETPLHDGSKYTVLGTTFPDAAIR		MP_MPAv1_NewWF_BGP_1_B.csv
	MP_MPAv1_NewWF_BGP_1_B.csv	155	Meta-Protein 773	Metagenome unknown	root	1	1	contig138973000071_32	HGPEYSIVESLK		MP_MPAv1_NewWF_BGP_1_B.csv
	MP_MPAv1_NewWF_BGP_1_B.csv	156	Meta-Protein 25	Metagenome unknown	root	4	8	ATB_S_contig090273, contig4268000036_1	AFLGLDPSDPAGEAGR, AITGTVVYKDFPATNSGK, ETTANLIEFYTTAFAGVTSPGQTKGAGPADPRPVIITTHGYLNSK		MP_MPAv1_NewWF_BGP_1_B.csv
	MP_MPAv1_NewWF_BGP_1_B.csv	157	Meta-Protein 774	Metagenome unknown	root	5	8	contig179000025_4	AGDGDVFVVGGMESMSTAPYAVPK, DLTAPQLAAVVIR, FQAEIVPVVIPQR, ILEETNLPPEEIDEVILGNVLQAAAGQNPARSYASSALDPGIMGLGPVEATR		MP_MPAv1_NewWF_BGP_1_B.csv
	MP_MPAv1_NewWF_BGP_1_B.csv	158	Meta-Protein 775	Metagenome unknown	root	1	1	contig221000027_4	LADRIPADIMEK		MP_MPAv1_NewWF_BGP_1_B.csv
	MP_MPAv1_NewWF_BGP_1_B.csv	159	Meta-Protein 776	Metagenome unknown	root	1	2	ATB_G30_contig006681	VENLHTYFEVR		MP_MPAv1_NewWF_BGP_1_B.csv
	MP_MPAv1_NewWF_BGP_1_B.csv	160	Meta-Protein 777	Metagenome unknown	root	1	2	contig18621000050_1	TTGFEELKATVEK		MP_MPAv1_NewWF_BGP_1_B.csv
	MP_MPAv1_NewWF_BGP_1_B.csv	161	Meta-Protein 26	MTRA_METBF Tetrahydromethanopterin S-methyltransferase subunit A OS=Methanosarcina barkeri (strain Fusaro / DSM 804) GN=mtrA PE=3 SV=1	root	5	13	Q9Y8K4, ATB_B_contig061781, contig139803000041_4, O59640	DNRIEGAVGAIPYVENLNAEAIAR, FQEQVEAVDLIDTEDMGAITAK, GHVTGQSMLALHANGVK, IEGAVGAIPYVENLNAEAIARYLLVTGSEVK		MP_MPAv1_NewWF_BGP_1_B.csv
	MP_MPAv1_NewWF_BGP_1_B.csv	162	Meta-Protein 778	Metagenome unknown	root	9	34	contig1343000027_19	AAVAVMPMWQVNQNNDWDFR, GATVTYVLHHDHLADFR, GYFVGDYQMR, LDDNGKVVFSLGEPEAVEALR, LPHNQFFQLASR, MDFGEIDFK, VVFSLGEPEAVEALR, YLAGDSTYDLWRYVSDRMDFGEIDFK		MP_MPAv1_NewWF_BGP_1_B.csv
	MP_MPAv1_NewWF_BGP_1_B.csv	163	Meta-Protein 779	Metagenome unknown	root	1	1	contig139172000061_8	IAYFGGINNAK		MP_MPAv1_NewWF_BGP_1_B.csv
	MP_MPAv1_NewWF_BGP_1_B.csv	164	Meta-Protein 780	Metagenome unknown	root	3	6	contig110925000008_1	NMDINEGNTNSIVLSNENFR, SYGPYRLETLEAAKVVIDVLDDAAAK		MP_MPAv1_NewWF_BGP_1_B.csv
	MP_MPAv1_NewWF_BGP_1_B.csv	165	Meta-Protein 781	Metagenome unknown	root	1	1	contig2388000040_2	VAKDPITGDTFPEYK		MP_MPAv1_NewWF_BGP_1_B.csv
	MP_MPAv1_NewWF_BGP_1_B.csv	166	Meta-Protein 782	Metagenome unknown	root	1	1	contig139187000034_93	LSRPTPTTVLGTNNASSLAER		MP_MPAv1_NewWF_BGP_1_B.csv
	MP_MPAv1_NewWF_BGP_1_B.csv	167	Meta-Protein 27	Metagenome unknown	root	1	2	contig138734000051_3, contig139460000067_11	NLVYAYGGAVTR		MP_MPAv1_NewWF_BGP_1_B.csv
	MP_MPAv1_NewWF_BGP_1_B.csv	168	Meta-Protein 783	Metagenome unknown	root	2	3	contig111000046_51	ITNIPEGNKLAVGQENDFNRYYWESADEDIAVVNSK		MP_MPAv1_NewWF_BGP_1_B.csv
	MP_MPAv1_NewWF_BGP_1_B.csv	169	Meta-Protein 784	Metagenome unknown	root	1	1	contig36923000009_2	NVATTLAMGGEVK		MP_MPAv1_NewWF_BGP_1_B.csv
	MP_MPAv1_NewWF_BGP_1_B.csv	170	Meta-Protein 28	Metagenome unknown	root	4	7	contig7312000005_43, contig218000021_95	GDAFVLNPLVK, GENEPGGIAFGFLADICQSSR, GIPQYDPDVGTPLGQRVFTGNDEIADEIDQR		MP_MPAv1_NewWF_BGP_1_B.csv
	MP_MPAv1_NewWF_BGP_1_B.csv	171	Meta-Protein 785	FA2H_RAT Fatty acid 2-hydroxylase OS=Rattus norvegicus GN=Fa2h PE=1 SV=2	Rattus norvegicus	1	1	Q2LAM0	MAPAPPPAASFTSAEVQR		MP_MPAv1_NewWF_BGP_1_B.csv
	MP_MPAv1_NewWF_BGP_1_B.csv	172	Meta-Protein 29	Metagenome unknown	root	2	11	contig15801000005_1, contig38490000056_1	LYMEENPGVEVRTFDDLVEALDILEAK		MP_MPAv1_NewWF_BGP_1_B.csv
	MP_MPAv1_NewWF_BGP_1_B.csv	173	Meta-Protein 30	Metagenome unknown	root	17	32	contig32718000056_2, contig36720000056_1, contig36093000038_1	AAGDLGAIATTFNYK, AGANYTLDKNNDLTEHVYTVDYAK, GKLAVIDTTFNYK, ITDDVKATFDYMHR, KGFYENPFNYK, LAVIDTTFNYK, LILDYTFSDALK, LTLGYNFTDALK, NIEAGFTPIR, NIEAGFTPIRGTAGETK, NIEEDFTSIVGR, SYLDIEDATSR, TFNLGDFDVTPEFAMNLGDAK, TFNLGNIEVTPEFAMNK, TWTVEEVTNIIAGVEAK, YTLDKNNDLTEHVYTVDYAKYTLNKDNDLSEHVYTVDYAK		MP_MPAv1_NewWF_BGP_1_B.csv
	MP_MPAv1_NewWF_BGP_1_B.csv	174	Meta-Protein 31	Metagenome unknown	root	1	2	contig13097000023_1, contig7221000001_1	LGIGTSSPSYDLHVQR		MP_MPAv1_NewWF_BGP_1_B.csv
	MP_MPAv1_NewWF_BGP_1_B.csv	175	Meta-Protein 786	Metagenome unknown	root	9	23	contig3085000059_5	DATYDIFTFTNANR, DATYDIFTFTNANRK, GLHDYSAPPPWYK, IVFDPNNPDVIYIGNDGGVFK, MIIGSYPYGELYR, SIGGPEAPGSDGFSSYLAPILLK, SLNGDNASFEQLANPWGTNVAR, SNEFGGNSQTFYSSGVTAYIKSQGLQWVNVGPTNLGGR		MP_MPAv1_NewWF_BGP_1_B.csv
	MP_MPAv1_NewWF_BGP_1_B.csv	176	Meta-Protein 787	Metagenome unknown	root	2	4	contig1228000005_11	IYDWNYEATKNADQALLIFGPAQAAVAK		MP_MPAv1_NewWF_BGP_1_B.csv
	MP_MPAv1_NewWF_BGP_1_B.csv	177	Meta-Protein 788	Metagenome unknown	root	1	1	contig1838000008_1	VNVDGGAIALGHPIGASGAR		MP_MPAv1_NewWF_BGP_1_B.csv
	MP_MPAv1_NewWF_BGP_1_B.csv	178	Meta-Protein 789	Metagenome unknown	root	2	4	contig764000062_4	EKIQNAILDEYAKIQNAILDEYAK		MP_MPAv1_NewWF_BGP_1_B.csv
	MP_MPAv1_NewWF_BGP_1_B.csv	179	Meta-Protein 790	Metagenome unknown	root	16	58	contig139855000004_3	AELYALKDLPIGK, AIEDNFIPYANVLGEHITAEQAAER, AYEDSPVYDESEKASFNAWLPTHK, EAMNILIDREYISNEIYGGMAVAK, EYISNEIYGGMAVAK, FFPITASFPDYAR, FGPWVDEVIVVEEPDASAALSR, FITAGEKFPEGLK, FTTIEERNELFR, LEAGDIDVYAYTVSMPDLFQK, SVAYYPENFFAVSK, TSAEATPIWYLGDPGEGK, VQHLNYIAGASLDILNEYLDK, VVSIPTFETLEFVTTR, WDVFAEPMIAEVEIIGSRYAHDPVKADAIIAEEMVK		MP_MPAv1_NewWF_BGP_1_B.csv
	MP_MPAv1_NewWF_BGP_1_B.csv	180	Meta-Protein 791	Metagenome unknown	root	2	3	contig56000025_6	FGFAGANDNHYSFKVKEQWEAFEAQLEKLN		MP_MPAv1_NewWF_BGP_1_B.csv
	MP_MPAv1_NewWF_BGP_1_B.csv	181	Meta-Protein 792	Metagenome unknown	root	1	1	contig129517000039_8	GKSLNLLNSIWPYVMMSAGCMGLK		MP_MPAv1_NewWF_BGP_1_B.csv
	MP_MPAv1_NewWF_BGP_1_B.csv	182	Meta-Protein 793	Metagenome unknown	root	1	1	contig21050000029_3	TTGFVSSTVGGGLAR		MP_MPAv1_NewWF_BGP_1_B.csv
	MP_MPAv1_NewWF_BGP_1_B.csv	183	Meta-Protein 32	Metagenome unknown	root	1	4	contig11119000027_8, contig63275000064_1	VDKDPITGDTFPEYK		MP_MPAv1_NewWF_BGP_1_B.csv
	MP_MPAv1_NewWF_BGP_1_B.csv	184	Meta-Protein 794	GL84_ORYSJ Germin-like protein 8-4 OS=Oryza sativa subsp. japonica GN=GER1 PE=2 SV=1	Oryza sativa Japonica Group	1	9	Q6YZZ6	IDYAPLGVNPPHIHPR		MP_MPAv1_NewWF_BGP_1_B.csv
	MP_MPAv1_NewWF_BGP_1_B.csv	185	Meta-Protein 795	Metagenome unknown	root	2	3	contig8548000012_9	KGDILVINTGYHKYAWDQPEADEVR		MP_MPAv1_NewWF_BGP_1_B.csv
	MP_MPAv1_NewWF_BGP_1_B.csv	186	Meta-Protein 796	Metagenome unknown	root	5	7	contig2438000017_47	EDVGIVGANIDTVAK, IKLEDIPSIVDDYGRPK, VAVGAAAVVAGVHAVR, YLVIGNKPFKYLVIGNKPFKESLAEAAK		MP_MPAv1_NewWF_BGP_1_B.csv
	MP_MPAv1_NewWF_BGP_1_B.csv	187	Meta-Protein 797	Metagenome unknown	root	2	3	contig139868000029_16	EQGIGITVDEFKKGVDIVGVVGR		MP_MPAv1_NewWF_BGP_1_B.csv
	MP_MPAv1_NewWF_BGP_1_B.csv	188	Meta-Protein 798	Metagenome unknown	root	1	1	contig21000022_13	ALLEQEGKPELALR		MP_MPAv1_NewWF_BGP_1_B.csv
	MP_MPAv1_NewWF_BGP_1_B.csv	189	Meta-Protein 799	Metagenome unknown	root	1	1	contig509000020_13	SIDLVVNKLER		MP_MPAv1_NewWF_BGP_1_B.csv
	MP_MPAv1_NewWF_BGP_1_B.csv	190	Meta-Protein 800	Metagenome unknown	root	4	5	contig855000012_5	AAGYSSSGVYDIPNMK, APAMPNDAASSALIK, VLPVDTDTSAYEWQTVASRYFGVPVEDIDIAESMVFVK		MP_MPAv1_NewWF_BGP_1_B.csv
	MP_MPAv1_NewWF_BGP_1_B.csv	191	Meta-Protein 33	Metagenome unknown	root	5	10	contig1943000072_14, contig139489000022_15, contig104182000032_17	GGVHAMTLPIAR, LHEAGANVVIADLNEEKGNALAAK, LHGAGANVVIADLNEEKGK, TAIVTGGASGLGEAAAVRVNTIAPGTFDTPMLAQLPQAAR		MP_MPAv1_NewWF_BGP_1_B.csv
	MP_MPAv1_NewWF_BGP_1_B.csv	192	Meta-Protein 34	Metagenome unknown	root	15	40	contig139681000053_1, contig19126000019_1, contig101000017_3	ANIGNYVYNSVAAER, ASIGYTGQNGILK, DLINMTSIPAGTNFR, DLNNQNIDVMAGYEWQR, GLTVNAQDMITGK, GVANFLSTINPNDIESFTVLK, IAGVLVTPNDGTPGGGSTIR, IAGVVVTPNDGTPGGGATIR, ISATVQNPFVITDYK, LGNENTDWQKEIYR, MINEDFLINNPTISDMK, MNVGPNGVWSPLGFFENK, NKVLQNIGSLK, SINKDAPHNPVALLKSSTNHVGGGYDGYDIQDKWNR		MP_MPAv1_NewWF_BGP_1_B.csv
	MP_MPAv1_NewWF_BGP_1_B.csv	193	Meta-Protein 801	Metagenome unknown	root	1	4	contig2521000001_1	FLGPSGGYTSDAIK		MP_MPAv1_NewWF_BGP_1_B.csv
	MP_MPAv1_NewWF_BGP_1_B.csv	194	Meta-Protein 802	Metagenome unknown	root	2	2	contig11018000029_1	GSYAILTLDKGDNYEKISGLEASAELMK		MP_MPAv1_NewWF_BGP_1_B.csv
	MP_MPAv1_NewWF_BGP_1_B.csv	195	Meta-Protein 803	Metagenome unknown	root	4	6	contig314000004_4	ALGYEYNETDPAIVAQAR, AVIEEFEQETGIR, EAVVGFMYSNQAVKFETNTPEDSLINR		MP_MPAv1_NewWF_BGP_1_B.csv
	MP_MPAv1_NewWF_BGP_1_B.csv	196	Meta-Protein 804	Metagenome unknown	root	3	3	contig436000044_3	ELSFEVGDPVNIIEIDQSLRR, KLTSYEFEFYEPYITKLLGGTLPDSDKFR		MP_MPAv1_NewWF_BGP_1_B.csv
	MP_MPAv1_NewWF_BGP_1_B.csv	197	Meta-Protein 805	Metagenome unknown	root	1	2	contig12764000036_4	MYEEFYYR		MP_MPAv1_NewWF_BGP_1_B.csv
	MP_MPAv1_NewWF_BGP_1_B.csv	198	Meta-Protein 806	Metagenome unknown	root	1	2	contig72000024_1	SDIVDKDLISHAPNLK		MP_MPAv1_NewWF_BGP_1_B.csv
	MP_MPAv1_NewWF_BGP_1_B.csv	199	Meta-Protein 35	Metagenome unknown	root	1	2	contig139356000027_2, contig607000015_1	IIAVDAIDER		MP_MPAv1_NewWF_BGP_1_B.csv
	MP_MPAv1_NewWF_BGP_1_B.csv	200	Meta-Protein 807	Metagenome unknown	root	2	3	contig1179000041_2	AAEVTTDITPMSYTVEDGIITVKSGTQNTYALVVDNSTEGAESR		MP_MPAv1_NewWF_BGP_1_B.csv
	MP_MPAv1_NewWF_BGP_1_B.csv	201	Meta-Protein 36	Metagenome unknown	root	4	7	contig23215000011_1, contig22319000028_1	ALDSPNIDDTYVK, IGTLQASDAANALIK, KSEVGTTTGAYHVFTTGTEKLQASDAANALIK		MP_MPAv1_NewWF_BGP_1_B.csv
	MP_MPAv1_NewWF_BGP_1_B.csv	202	Meta-Protein 808	Metagenome unknown	root	3	8	contig1587000072_2	FDYELNFNVK, LTLNDQWFTANVWGNGQELSDKTNWEFSGAVNAGHGLGK		MP_MPAv1_NewWF_BGP_1_B.csv
	MP_MPAv1_NewWF_BGP_1_B.csv	203	Meta-Protein 809	Metagenome unknown	root	6	14	contig7021000063_1	DLNVAGVEFNYK, KGFELAGLNLNAK, LALKGEMPLLIDGLK, TNELGATYPIVEGTDLVVNYK, VFNLDADTTVKVTPNLFTGIGLNTEVFYANVDEAGDKESK		MP_MPAv1_NewWF_BGP_1_B.csv
	MP_MPAv1_NewWF_BGP_1_B.csv	204	Meta-Protein 810	Metagenome unknown	root	1	1	contig139697000054_3	QVQIEEQDERLVHINSFAK		MP_MPAv1_NewWF_BGP_1_B.csv
	MP_MPAv1_NewWF_BGP_1_B.csv	205	Meta-Protein 811	USP7_PINMG Uncharacterized shell protein 7 OS=Pinctada margaritifera PE=1 SV=1	Pinctada margaritifera	1	1	H2A0N6	AGAAAGASAGIGNQGRGAGLLR		MP_MPAv1_NewWF_BGP_1_B.csv
	MP_MPAv1_NewWF_BGP_1_B.csv	206	Meta-Protein 812	Metagenome unknown	root	1	1	contig12000036_20	CSNRDLLGIR		MP_MPAv1_NewWF_BGP_1_B.csv
	MP_MPAv1_NewWF_BGP_1_B.csv	207	Meta-Protein 813	Metagenome unknown	root	1	1	contig7594000005_1	VGISMPTQSLQR		MP_MPAv1_NewWF_BGP_1_B.csv
	MP_MPAv1_NewWF_BGP_1_B.csv	208	Meta-Protein 814	Metagenome unknown	root	1	1	contig140005000046_7	LWGPANIIAVDIDDSRLEFAQK		MP_MPAv1_NewWF_BGP_1_B.csv
	MP_MPAv1_NewWF_BGP_1_B.csv	209	Meta-Protein 815	GL32_ORYSJ Putative germin-like protein 3-2 OS=Oryza sativa subsp. japonica GN=Os03g0651800 PE=3 SV=1	Oryza sativa Japonica Group	1	2	Q7XZY1	TVSKGEVFVFPR		MP_MPAv1_NewWF_BGP_1_B.csv
	MP_MPAv1_NewWF_BGP_1_B.csv	210	Meta-Protein 816	Metagenome unknown	root	2	5	contig371000037_1	EGQDTFNPLKGSISPRIDSDLSKYDVYLQSAAR		MP_MPAv1_NewWF_BGP_1_B.csv
	MP_MPAv1_NewWF_BGP_1_B.csv	211	Meta-Protein 817	Metagenome unknown	root	1	1	contig177000024_3	GLADLEDGVQLMKPIDGLGELLKR		MP_MPAv1_NewWF_BGP_1_B.csv
	MP_MPAv1_NewWF_BGP_1_B.csv	212	Meta-Protein 37	Metagenome unknown	root	1	1	contig812000017_3, contig139031000045_18	TLHPDNMAAGPASYGMTDTMGR		MP_MPAv1_NewWF_BGP_1_B.csv
	MP_MPAv1_NewWF_BGP_1_B.csv	213	Meta-Protein 818	Metagenome unknown	root	4	10	contig56000025_14	IDDESWMVTQAQTSR, VFDSDGNLTYSMTLLEYER, VTSEWIIAPDVGWPLAVKVVEEQKVAGVDGFLAR		MP_MPAv1_NewWF_BGP_1_B.csv
	MP_MPAv1_NewWF_BGP_1_B.csv	214	Meta-Protein 819	Metagenome unknown	root	2	3	contig139864000004_67	ANIKPEQIAAIGITNQRAVPSESGLLTTIAYGINDEVK		MP_MPAv1_NewWF_BGP_1_B.csv
	MP_MPAv1_NewWF_BGP_1_B.csv	215	Meta-Protein 820	Metagenome unknown	root	3	3	contig661000077_2	AGYGQTSNQSVDPYATLGR, IPGVEMSQVSTKPGSPMQIRSSTTNWAVENLLTYDR		MP_MPAv1_NewWF_BGP_1_B.csv
	MP_MPAv1_NewWF_BGP_1_B.csv	216	Meta-Protein 821	Metagenome unknown	root	2	2	contig127000011_10	DKYGYEYYEALGDQKVVIYTSMYEDIIEEVDR		MP_MPAv1_NewWF_BGP_1_B.csv
	MP_MPAv1_NewWF_BGP_1_B.csv	217	Meta-Protein 822	Metagenome unknown	root	1	1	contig138967000050_2	INEILQQTTGQPLEK		MP_MPAv1_NewWF_BGP_1_B.csv
	MP_MPAv1_NewWF_BGP_1_B.csv	218	Meta-Protein 823	Metagenome unknown	root	4	7	contig779000036_2	FIFNSEVQEIQGEGR, GLYGGQMQNTLEIENYPGFK, GTGILDEWGYVVTGADMKTLEVGGEVIEAR		MP_MPAv1_NewWF_BGP_1_B.csv
	MP_MPAv1_NewWF_BGP_1_B.csv	219	Meta-Protein 824	Metagenome unknown	root	1	3	contig1936000013_8	NRPVNIEANFTEVGTYK		MP_MPAv1_NewWF_BGP_1_B.csv
	MP_MPAv1_NewWF_BGP_1_B.csv	220	Meta-Protein 825	Metagenome unknown	root	1	1	contig16670000078_3	AIVEAVNNFDNPAK		MP_MPAv1_NewWF_BGP_1_B.csv
	MP_MPAv1_NewWF_BGP_1_B.csv	221	Meta-Protein 826	Metagenome unknown	root	3	6	contig15960000028_2	AGFLMNDIGFK, NLDTEDNEADAITSLLASAEYKLDALTAKYTYDALTFEGWYK		MP_MPAv1_NewWF_BGP_1_B.csv
	MP_MPAv1_NewWF_BGP_1_B.csv	222	Meta-Protein 827	Metagenome unknown	root	3	8	contig139252000077_1	IQMIDALDPLDVGTTSVTLK, NGVAHYDGEGNLAFVGNVRVGLTDFTFSTK		MP_MPAv1_NewWF_BGP_1_B.csv
	MP_MPAv1_NewWF_BGP_1_B.csv	223	Meta-Protein 828	ANXA2_RAT Annexin A2 OS=Rattus norvegicus GN=Anxa2 PE=1 SV=2	Rattus norvegicus	1	1	Q07936	ELPSAMKSALSGHLETVMLGLLK		MP_MPAv1_NewWF_BGP_1_B.csv
	MP_MPAv1_NewWF_BGP_1_B.csv	224	Meta-Protein 829	Metagenome unknown	root	1	5	contig126880000017_1	IKELGGEPTSALAGPIVK		MP_MPAv1_NewWF_BGP_1_B.csv
	MP_MPAv1_NewWF_BGP_1_B.csv	225	Meta-Protein 830	Metagenome unknown	root	10	33	contig139679000026_2	ALFYNVDMFK, AMQWYVDLVR, ASFSGGSNLVVLK, FLLEKDNMVEYTK, NAFMNANYVSTTYK, NLTHMLPAQVEVFADPYYDSGVWK, QEFVNVLSEYVDGTYNDNTVKK, SYGVPWFAETR, TTLEYSTAYPPLATWGDIENIVKVNVEIIGWDVAWQR		MP_MPAv1_NewWF_BGP_1_B.csv
	MP_MPAv1_NewWF_BGP_1_B.csv	226	Meta-Protein 831	Metagenome unknown	root	1	1	contig60859000050_1	LMEGMGLGDSVNR		MP_MPAv1_NewWF_BGP_1_B.csv
	MP_MPAv1_NewWF_BGP_1_B.csv	227	Meta-Protein 832	Metagenome unknown	root	2	5	contig7741000043_1	VFAVNYDGTLVDPDGKVTKVEPYEELLTR		MP_MPAv1_NewWF_BGP_1_B.csv
	MP_MPAv1_NewWF_BGP_1_B.csv	228	Meta-Protein 833	Metagenome unknown	root	2	4	contig139535000067_7	AEEVIAYIEATMQDLESRSSTIGQASAQAAAEADTLQSK		MP_MPAv1_NewWF_BGP_1_B.csv
	MP_MPAv1_NewWF_BGP_1_B.csv	229	Meta-Protein 834	Metagenome unknown	root	3	5	contig9629000079_4	LEPGEAIISQAGGR, MNYSIEGGTLPAVLIRYTAQGLAEVAFSSSFPGR		MP_MPAv1_NewWF_BGP_1_B.csv
	MP_MPAv1_NewWF_BGP_1_B.csv	230	Meta-Protein 835	Metagenome unknown	root	2	3	contig5904000061_1	FTPSEDDPEVTDPYVKGGAPVYVDTLMK		MP_MPAv1_NewWF_BGP_1_B.csv
	MP_MPAv1_NewWF_BGP_1_B.csv	231	Meta-Protein 836	Metagenome unknown	root	3	7	contig10211000053_2	DVAGQGAQDVHETLTPLANTSK, GTAPVGSPELGLISGAVAKKGTAPVGSPELGLISGAVAK		MP_MPAv1_NewWF_BGP_1_B.csv
	MP_MPAv1_NewWF_BGP_1_B.csv	232	Meta-Protein 837	Metagenome unknown	root	1	1	contig524000018_3	MTVGETTESSIEEIR		MP_MPAv1_NewWF_BGP_1_B.csv
	MP_MPAv1_NewWF_BGP_1_B.csv	233	Meta-Protein 838	Metagenome unknown	root	1	1	contig139486000022_20	VVYDTYATNEDMYVK		MP_MPAv1_NewWF_BGP_1_B.csv
	MP_MPAv1_NewWF_BGP_1_B.csv	234	Meta-Protein 839	Metagenome unknown	root	3	9	contig139208000033_12	EAAFQVLEILTSPEVQQWVLER, LEQVAAIDPDIYGLALQPEFARQATVEEALQEAQQR		MP_MPAv1_NewWF_BGP_1_B.csv
	MP_MPAv1_NewWF_BGP_1_B.csv	235	Meta-Protein 840	Metagenome unknown	root	1	1	contig140139000023_36	GNSLIGGNSLYVSNR		MP_MPAv1_NewWF_BGP_1_B.csv
	MP_MPAv1_NewWF_BGP_1_B.csv	236	Meta-Protein 841	Metagenome unknown	root	7	11	contig136000041_32	GQLGGNAALNFTLPAK, LGDFQYPVPNYLAGNYHK, MAGMGIMITDYPVYQDK, SIDQDFAPFAR, TAAGSTTPTYILLLK, VTVTPFFAWPKYDGFTGDIIGNTYLK		MP_MPAv1_NewWF_BGP_1_B.csv
	MP_MPAv1_NewWF_BGP_1_B.csv	237	Meta-Protein 842	Metagenome unknown	root	3	5	contig163000034_8	AEAITMLDNVLENSK, LSDLDKLDSIKLDRTIEYNGTITDPEIK		MP_MPAv1_NewWF_BGP_1_B.csv
	MP_MPAv1_NewWF_BGP_1_B.csv	238	Meta-Protein 843	Metagenome unknown	root	6	17	contig5028000013_55	AFADGNIGDISLGLAFAR, IGLSDTLLTLTVQK, LTVVKDGDNANEFSLSANYR, MEVPVMDLATLTVDFDQK, VTYADAALQAIASAKYQLSLYDQYFK		MP_MPAv1_NewWF_BGP_1_B.csv
	MP_MPAv1_NewWF_BGP_1_B.csv	239	Meta-Protein 38	Metagenome unknown	root	3	4	contig30000046_29, contig139160000057_13, contig139162000057_7	FHPGVSLEEVK, IVAVGEWAPKNEATGFGVAVITR		MP_MPAv1_NewWF_BGP_1_B.csv
	MP_MPAv1_NewWF_BGP_1_B.csv	240	Meta-Protein 39	Metagenome unknown	root	4	8	ATB_S_contig009022, contig139929000023_4, contig2970000051_3, contig2634000064_1	DKPVLDVQPLSIGGKENPAR, GFTTNFEDLTGLR, GGTSFMEDYVYHLDPAGQRLGEIYYHLAR		MP_MPAv1_NewWF_BGP_1_B.csv
	MP_MPAv1_NewWF_BGP_1_B.csv	241	Meta-Protein 844	Metagenome unknown	root	1	1	contig535000057_4	TPGLHVILVGDNPASK		MP_MPAv1_NewWF_BGP_1_B.csv
	MP_MPAv1_NewWF_BGP_1_B.csv	242	Meta-Protein 845	Metagenome unknown	root	1	1	contig1019000004_14	VLNNTGEDLVLQAQK		MP_MPAv1_NewWF_BGP_1_B.csv
	MP_MPAv1_NewWF_BGP_1_B.csv	243	Meta-Protein 40	Metagenome unknown	root	3	5	contig218000021_91, contig7312000005_39	ELDLDIVGNADAIAAK, TVAVNLEGTENALKYVNEAAAEIKNQV		MP_MPAv1_NewWF_BGP_1_B.csv
	MP_MPAv1_NewWF_BGP_1_B.csv	244	Meta-Protein 41	Metagenome unknown	root	5	10	contig1912000072_31, contig139215000021_3	AAGATVLADVREVYEQADLIIK, HLEPEWLEKER, LVELGIPDELAVGEGGYAK, NVFNFVDNLVAEGRVSATPETVSQFVK		MP_MPAv1_NewWF_BGP_1_B.csv
	MP_MPAv1_NewWF_BGP_1_B.csv	245	Meta-Protein 846	Metagenome unknown	root	1	1	contig5994000012_8	HTDTAQVADIYLQVK		MP_MPAv1_NewWF_BGP_1_B.csv
	MP_MPAv1_NewWF_BGP_1_B.csv	246	Meta-Protein 847	VPS27_USTMA Vacuolar protein sorting-associated protein 27 OS=Ustilago maydis (strain 521 / FGSC 9021) GN=VPS27 PE=3 SV=1	Ustilago maydis 521	1	1	Q4P7Q1	TGMVGAPLPASVQAMYEKASSARPR		MP_MPAv1_NewWF_BGP_1_B.csv
	MP_MPAv1_NewWF_BGP_1_B.csv	247	Meta-Protein 848	Metagenome unknown	root	3	10	contig542000061_2	FIEIGKDVLEK, IYAEINPDVTINIVETPWDDVQTKNFGVPFDNGAAITALR		MP_MPAv1_NewWF_BGP_1_B.csv
	MP_MPAv1_NewWF_BGP_1_B.csv	248	Meta-Protein 849	Metagenome unknown	root	2	3	contig5925000073_16	AGLFETKPMDQVKPGLDTVKVGIVGVPCQVQAVR		MP_MPAv1_NewWF_BGP_1_B.csv
	MP_MPAv1_NewWF_BGP_1_B.csv	249	Meta-Protein 850	Metagenome unknown	root	1	1	contig67646000034_4	EISVTANEEQATIYAENR		MP_MPAv1_NewWF_BGP_1_B.csv
	MP_MPAv1_NewWF_BGP_1_B.csv	250	Meta-Protein 851	Metagenome unknown	root	3	11	ATB_B_contig103493	LVLADDYFTASIWGNK, LVLADDYFTASIWGNKQELSDKQELSDKATYFGMIK		MP_MPAv1_NewWF_BGP_1_B.csv
	MP_MPAv1_NewWF_BGP_1_B.csv	251	Meta-Protein 42	Metagenome unknown	root	9	22	contig138551000059_1, contig140087000023_22	APGPWANDLLVDVSAK, AYDFTLNQAVNVYLADEDTKEGAR, DKDWLYEVK, FRLEYLSSADYK, IEDPFKYALILK, LPVDFSPYIAK, NIAYVGEGKPIDAIWK, NIAYVGEGKPIDAIWKRTLGLMVEGFDYELGPVNLAVK		MP_MPAv1_NewWF_BGP_1_B.csv
	MP_MPAv1_NewWF_BGP_1_B.csv	252	Meta-Protein 852	Metagenome unknown	root	2	4	contig11303000076_3	AIEGPLLGDITRAIEGPLLGDITRK		MP_MPAv1_NewWF_BGP_1_B.csv
	MP_MPAv1_NewWF_BGP_1_B.csv	253	Meta-Protein 853	Metagenome unknown	root	1	1	contig40734000008_6	ILKTEMPPMGHSR		MP_MPAv1_NewWF_BGP_1_B.csv
	MP_MPAv1_NewWF_BGP_1_B.csv	254	Meta-Protein 854	Metagenome unknown	root	2	11	contig561000049_7	NTRPIAEANAQEQALKLETEGQTLTRQINEAGTVATFVVDEVAGK		MP_MPAv1_NewWF_BGP_1_B.csv
	MP_MPAv1_NewWF_BGP_1_B.csv	255	Meta-Protein 855	Metagenome unknown	root	1	1	contig3263000071_6	VSGTHPNATTFGINFEDAR		MP_MPAv1_NewWF_BGP_1_B.csv
	MP_MPAv1_NewWF_BGP_1_B.csv	256	Meta-Protein 856	Metagenome unknown	root	1	3	contig235000069_2	SVQDLDGIGMSILEISHR		MP_MPAv1_NewWF_BGP_1_B.csv
	MP_MPAv1_NewWF_BGP_1_B.csv	257	Meta-Protein 857	Metagenome unknown	root	1	1	contig2439000052_1	DLGDAQSCQVNINCSPEGDNWQVQKR		MP_MPAv1_NewWF_BGP_1_B.csv
	MP_MPAv1_NewWF_BGP_1_B.csv	258	Meta-Protein 43	Metagenome unknown	root	6	12	contig402000065_13, contig44026000045_1, contig1459000013_1	ATNILAGIEAAK, EFDAELLELGIR, KATNILAGIEAAK, TTFVGLTYDITEDVAANLDYK, VEEDNAINFIGFDVFANAAYRYEVATILAR		MP_MPAv1_NewWF_BGP_1_B.csv
	MP_MPAv1_NewWF_BGP_1_B.csv	259	Meta-Protein 858	Metagenome unknown	root	1	1	contig764000012_2	TIVQETFYPNAPR		MP_MPAv1_NewWF_BGP_1_B.csv
	MP_MPAv1_NewWF_BGP_1_B.csv	260	Meta-Protein 44	Metagenome unknown	root	18	70	contig139284000056_1, contig139511000048_1, contig139780000044_9, contig110043000024_1	AGDIDVWATTSSNATAFDSVR, ALELSLEDSPR, ATALNVEWLGYQAGPSLR, DQGHIFEQMFSR, FVTVGEVYPGGLVVPR, GDFLMQLVLDWDR, GMASPLWLAMDPIPELDEISEK, IFTVDQISFIPK, IYTVDQISYIAR, KLVGDYVGEQLSK, LIDRDYIAQELYGGLALPK, LVGDYVGEQLSK, MEVTVQEGLPVAK, MGTWVDEVIIVEEPDVSTAISR, MGTWVDEVVIVEEPNITTAISR, TIIASELMDAGAK, TIMLNNAYVDYSRYNMLNNSYVDYSR		MP_MPAv1_NewWF_BGP_1_B.csv
	MP_MPAv1_NewWF_BGP_1_B.csv	261	Meta-Protein 859	Metagenome unknown	root	8	21	contig1343000027_20	AFVNGTGANLGDPMQAVR, IAYLSGNTELFK, LINIYAHEEQKELQIPAFVGR, LNADWQITDNVK, LSENSFQVGLVEVK, LTYTGIDKVTLVGEVGR, NDYILGAVITTKVGDDLALTGQAVASGINAFGFYGK		MP_MPAv1_NewWF_BGP_1_B.csv
	MP_MPAv1_NewWF_BGP_1_B.csv	262	Meta-Protein 860	Metagenome unknown	root	4	11	contig139190000073_1	FSGPALLGYEEEVVLGK, FSVTELDAGRLPK, IITPFTVDVEAVELKYVSQGLGVSADDVLYANK		MP_MPAv1_NewWF_BGP_1_B.csv
	MP_MPAv1_NewWF_BGP_1_B.csv	263	Meta-Protein 861	ZEAA_MAIZE Zein-alpha 19D1 OS=Zea mays PE=2 SV=1	Zea mays	1	2	P06678	FEYPTIQSYR		MP_MPAv1_NewWF_BGP_1_B.csv
	MP_MPAv1_NewWF_BGP_1_B.csv	264	Meta-Protein 45	Metagenome unknown	root	8	19	contig319000053_3, contig139443000030_52, contig105000068_6	ILDADFPTLMANVTR, LVADTGIMLR, LVVEDGQIVEYESELLPVTADIPK, NVVGLVFHDPIAVAK, TQETNLGNLIADIIR, VGIMGLVAQETPMVTHPK, VQAVIDRWNEQVEHRYYLVATNDFLAAGGDGYDTLK		MP_MPAv1_NewWF_BGP_1_B.csv
	MP_MPAv1_NewWF_BGP_1_B.csv	265	Meta-Protein 862	Metagenome unknown	root	1	1	contig4779000053_6	IAIETIQQLK		MP_MPAv1_NewWF_BGP_1_B.csv
	MP_MPAv1_NewWF_BGP_1_B.csv	266	Meta-Protein 863	Metagenome unknown	root	3	8	contig2980000056_1	AFLFIEALYTDAK, GWIHPDAATMENTAEQMKNMLNFGIEGIHYTVNPDGR		MP_MPAv1_NewWF_BGP_1_B.csv
	MP_MPAv1_NewWF_BGP_1_B.csv	267	Meta-Protein 864	Metagenome unknown	root	2	8	contig2146000032_6	FDVQDKQSLQLEALKINITTTDLEGLGEIIDAAVK		MP_MPAv1_NewWF_BGP_1_B.csv
	MP_MPAv1_NewWF_BGP_1_B.csv	268	Meta-Protein 865	Metagenome unknown	root	1	1	contig1004000014_23	IAATEGLGEMDLSK		MP_MPAv1_NewWF_BGP_1_B.csv
	MP_MPAv1_NewWF_BGP_1_B.csv	269	Meta-Protein 46	Metagenome unknown	root	8	66	contig50096000040_3, ATB_S_contig003263	ALEFQYAYDFETGK, EAMNYIIDRDYIAQELYEGLAQPK, LVGDYVSEQLSK, MGTWVDEVIIVEEPNINTAISR, QIIWEEMMNHGAK, RLVGDYVSEQLSK, RMGTWVDEVIIVEEPNINTAISRTLMLNPAYVDYAR		MP_MPAv1_NewWF_BGP_1_B.csv
	MP_MPAv1_NewWF_BGP_1_B.csv	270	Meta-Protein 866	Metagenome unknown	root	1	3	contig11417000023_40	VIDPLEIDR		MP_MPAv1_NewWF_BGP_1_B.csv
	MP_MPAv1_NewWF_BGP_1_B.csv	271	Meta-Protein 867	Metagenome unknown	root	1	1	contig2647000035_2	AIQMVAENLVK		MP_MPAv1_NewWF_BGP_1_B.csv
	MP_MPAv1_NewWF_BGP_1_B.csv	272	Meta-Protein 868	Metagenome unknown	root	2	5	contig10211000053_3	AMQGIPVSEETLSVESIQKDLAAVAHEKVEDILK		MP_MPAv1_NewWF_BGP_1_B.csv
	MP_MPAv1_NewWF_BGP_1_B.csv	273	Meta-Protein 47	Metagenome unknown	root	18	99	ATB_B_contig124062, ATB_S_contig003262, contig575000028_4	AEISVASDLAQGIGSTHLWPSTIR, ALELSLLDSPR, ATQLDIEWLGYNTGPSLPVLAK, FEQYSEPADKWAMFDEPR, FITVGEKYPEGLTAPR, FITVGEKYPEGLTAPRK, GFVSNPYTGNYMPHR, GFVSNPYTGNYMPHRIER, IERIEVTVEEGLPVAK, IEVTVEEGLPVAK, IYTVDQLSYIPR, KTVVYYREDLYDTVLWHDGSK, MGSQQVLVEPWNPVAGSNWAFDNLAIR, NFSSMEERNDLYAR, RAEISVASDLAQGIGSTHLWPSTIR, RFEQYSEPADKWAMFDEPR, TVVYYREDLYDTVLWHDGSKWLDYAIENNYLPWEHVLK		MP_MPAv1_NewWF_BGP_1_B.csv
	MP_MPAv1_NewWF_BGP_1_B.csv	274	Meta-Protein 869	Metagenome unknown	root	8	49	contig559000061_3	DNVQEALIDSGYYDAGEFTGI, EQLAAIIGEVTTDWDMNVAK, FEDVIAETPYSVEVLFSQGSSAAEK, FEGVTVISYDR, QRVDVGIVLPTKDEPR, SIADVFAADPDVTEYFITGQDAEK, TPQTDATYFNQAIDVPSKVLAADAMNMAIDILEGR		MP_MPAv1_NewWF_BGP_1_B.csv
	MP_MPAv1_NewWF_BGP_1_B.csv	275	Meta-Protein 870	Metagenome unknown	root	4	6	contig139678000004_4	IYILDIWGR, LANSGAVIGDQFPKLEGR, TLDAYFDLLERYLPGVIMSDNFDAAWDEYVAR		MP_MPAv1_NewWF_BGP_1_B.csv
	MP_MPAv1_NewWF_BGP_1_B.csv	276	Meta-Protein 871	NIFJ_NOSS1 Pyruvate-flavodoxin oxidoreductase OS=Nostoc sp. (strain PCC 7120 / SAG 25.82 / UTEX 2576) GN=nifJ PE=2 SV=2	Nostoc sp. PCC 7120	1	3	Q06879	SLATHALSIFGDHSDVMAAR		MP_MPAv1_NewWF_BGP_1_B.csv
	MP_MPAv1_NewWF_BGP_1_B.csv	277	Meta-Protein 872	Metagenome unknown	root	1	1	contig674000002_2	EIQVFHTVLQTPDNQK		MP_MPAv1_NewWF_BGP_1_B.csv
	MP_MPAv1_NewWF_BGP_1_B.csv	278	Meta-Protein 873	Metagenome unknown	root	4	9	contig850000016_2	ATANVTEELTDVGVK, AVAPFESFGYNMK, LLDQFDISDLVKYAISPDTSLELSYR		MP_MPAv1_NewWF_BGP_1_B.csv
	MP_MPAv1_NewWF_BGP_1_B.csv	279	Meta-Protein 874	Metagenome unknown	root	1	1	contig139212000073_46	GANAGPVYTEPFANVR		MP_MPAv1_NewWF_BGP_1_B.csv
	MP_MPAv1_NewWF_BGP_1_B.csv	280	Meta-Protein 48	Metagenome unknown	root	3	10	contig43418000003_2, ATB_G5_contig006421, ATB_G30_contig089443	LSNIDYNEEFR, TILNDSFLEYQKVLKVELDEEEINNLNK		MP_MPAv1_NewWF_BGP_1_B.csv
	MP_MPAv1_NewWF_BGP_1_B.csv	281	Meta-Protein 49	Metagenome unknown	root	9	34	contig402000023_2, contig1801000069_1, contig369000070_5	AGVWSVDPDIEIIGNYTGAFDDPAK, AGVWSVDPDIEIIGNYTGAFDDPAKGK, EGYDVVWAIGFLLEDAVKK, EHEGSFLVGVLAAETTK, FGIIDSGFDEEVHATELQNVLGVLFK, IASGDFVVPEFPSDVYK, RVDVGVFEGTLMLLDPNFK, TPSDYEPNLSMLARVDVGVFEGTLMLLDPNFK		MP_MPAv1_NewWF_BGP_1_B.csv
	MP_MPAv1_NewWF_BGP_1_B.csv	282	Meta-Protein 875	Metagenome unknown	root	1	1	contig139118000061_6	MTIEQVDAITGPPMGHPK		MP_MPAv1_NewWF_BGP_1_B.csv
	MP_MPAv1_NewWF_BGP_1_B.csv	283	Meta-Protein 876	Metagenome unknown	root	2	3	contig2992000075_9	IAYFVGIDKYPFLLIDKIEELVPGQK		MP_MPAv1_NewWF_BGP_1_B.csv
	MP_MPAv1_NewWF_BGP_1_B.csv	284	Meta-Protein 877	Metagenome unknown	root	1	2	contig3914000032_2	GVGTVGQAAAGLMTEQPEK		MP_MPAv1_NewWF_BGP_1_B.csv
	MP_MPAv1_NewWF_BGP_1_B.csv	285	Meta-Protein 878	Metagenome unknown	root	1	2	contig139749000041_13	SIDKIYGLNDQGLPVESK		MP_MPAv1_NewWF_BGP_1_B.csv
	MP_MPAv1_NewWF_BGP_1_B.csv	286	Meta-Protein 879	Metagenome unknown	root	1	1	contig60_30	TSVVTGVEMFR		MP_MPAv1_NewWF_BGP_1_B.csv
	MP_MPAv1_NewWF_BGP_1_B.csv	287	Meta-Protein 880	Metagenome unknown	root	1	3	contig2105000017_3	LGTADEPLEKLEFK		MP_MPAv1_NewWF_BGP_1_B.csv
	MP_MPAv1_NewWF_BGP_1_B.csv	288	Meta-Protein 50	Metagenome unknown	root	6	13	contig186000026_5, contig32793000062_1	ADLDEETVYQITK, EIQLEGALEGITTPIHPGAAK, IQAEEPYFVR, KVIPAGTYDGQEEDIHTITCK, NVEDLKGLTIAVGPPGSGTVGLTEKVLAAAGLDINKDINPQNDTFGDAATK		MP_MPAv1_NewWF_BGP_1_B.csv
	MP_MPAv1_NewWF_BGP_1_B.csv	289	Meta-Protein 881	Metagenome unknown	root	1	1	contig450000021_6	AVDADGNEIIFTAR		MP_MPAv1_NewWF_BGP_1_B.csv
	MP_MPAv1_NewWF_BGP_1_B.csv	290	Meta-Protein 882	Metagenome unknown	root	3	7	contig735000068_1	DGVDFLLISAANASGWDDVLESAK, DGVDFLLISAANASGWDDVLESAKRQANVEDMDAVFSR		MP_MPAv1_NewWF_BGP_1_B.csv
	MP_MPAv1_NewWF_BGP_1_B.csv	291	Meta-Protein 51	Metagenome unknown	root	1	2	contig139327000021_6, contig511000038_34	YSISDTAEYGDYVTGNR		MP_MPAv1_NewWF_BGP_1_B.csv
	MP_MPAv1_NewWF_BGP_1_B.csv	292	Meta-Protein 883	Metagenome unknown	root	1	1	contig110000076_4	IYEPIGMIR		MP_MPAv1_NewWF_BGP_1_B.csv
	MP_MPAv1_NewWF_BGP_1_B.csv	293	Meta-Protein 884	Metagenome unknown	root	3	5	contig139610000012_9	AGVPAAGTIEEMVEK, ILFVGQGISSTAEIIEFARVADAVQAQDDMEVIGVSK		MP_MPAv1_NewWF_BGP_1_B.csv
	MP_MPAv1_NewWF_BGP_1_B.csv	294	Meta-Protein 885	Metagenome unknown	root	1	1	contig54344000033_28	AAVGDYVADQLEAIGFTTK		MP_MPAv1_NewWF_BGP_1_B.csv
	MP_MPAv1_NewWF_BGP_1_B.csv	295	Meta-Protein 886	Metagenome unknown	root	2	2	contig59000011_33	ATIMTNDSGQMHDQLLNSLSSKGLTPEDILNYTEGETHNALLNGEAVFAR		MP_MPAv1_NewWF_BGP_1_B.csv
	MP_MPAv1_NewWF_BGP_1_B.csv	296	Meta-Protein 887	Metagenome unknown	root	4	21	contig3509000009_26	AFAVNGIIPDSK, AFAVNGIIPDSKEQIEYK, NTGNIPGQLFISATESSSVQSLADNVKNVDSSIQNNEMGQTLNVDMK		MP_MPAv1_NewWF_BGP_1_B.csv
	MP_MPAv1_NewWF_BGP_1_B.csv	297	Meta-Protein 888	Metagenome unknown	root	3	6	contig3191000053_2	ALGYDVFGR, IGAAFTGLVDSENSDQKVGAEYDFPQVPGLK		MP_MPAv1_NewWF_BGP_1_B.csv
	MP_MPAv1_NewWF_BGP_1_B.csv	298	Meta-Protein 889	Metagenome unknown	root	2	4	contig15756000037_1	LVEVLSQYTSPDLVKTAMDEAWWK		MP_MPAv1_NewWF_BGP_1_B.csv
	MP_MPAv1_NewWF_BGP_1_B.csv	299	Meta-Protein 890	Metagenome unknown	root	3	5	contig518000047_69	AVSLGLDKGIEDVALTDVVSR, LIYNAMFATNSKSATEFAPNDNITFQEAVTMAVR		MP_MPAv1_NewWF_BGP_1_B.csv
	MP_MPAv1_NewWF_BGP_1_B.csv	300	Meta-Protein 891	Metagenome unknown	root	1	1	contig4648000079_1	VMLEAFGGAAVK		MP_MPAv1_NewWF_BGP_1_B.csv
	MP_MPAv1_NewWF_BGP_1_B.csv	301	Meta-Protein 52	Metagenome unknown	root	4	11	contig139131000015_10, contig1529000075_5, contig732000013_2	HANDFYALSEGKEVDAR, IKFTPTNPPDYNAVLR, LEYETGQVPFNDEKTQLTGGTGPDLMYVR		MP_MPAv1_NewWF_BGP_1_B.csv
	MP_MPAv1_NewWF_BGP_1_B.csv	302	Meta-Protein 53	Metagenome unknown	root	17	58	contig939000039_2, ATB_B_contig013902, contig39000065_1	ADLNFLPDWIWK, DRFEGYVPMHGYGAANYTNK, DSEAQLIAFNR, DVEDYNTFEPWLEAHPEVSGLTK, FEGYVPMHGYGAANYTNK, FTVEYLKENQVPR, GDVDVLPGLTRPADINIIK, ITIYTPTYEAAPTSAELGK, ITIYTPTYEVAPTSAELGK, KITIYTPTYEVAPTSAELGK, LIGHGPFILDQYK, LLDEAGYTVDPATGIR, LYDGMMEVDPDTMQDIPWLAK, QAADEAQLILAR, SWDIETWEPAPGQEGTVITWHLEEGVK, VLNPCTGSSAYEWEVMGRWEPYGPYVDQIIMPIIK		MP_MPAv1_NewWF_BGP_1_B.csv
	MP_MPAv1_NewWF_BGP_1_B.csv	303	Meta-Protein 892	Metagenome unknown	root	1	1	contig4305000067_20	IGAIITDNPEFATR		MP_MPAv1_NewWF_BGP_1_B.csv
	MP_MPAv1_NewWF_BGP_1_B.csv	304	Meta-Protein 893	Metagenome unknown	root	5	10	ATB_G5_contig080291	ADVITLHVPLTSETK, GFGMDIIAYDIYQDINSNIK, GQLTNEVNQFLEGIKA, VPSYSPEAVAEHAAALLLAVNRYVSLDELFSK		MP_MPAv1_NewWF_BGP_1_B.csv
	MP_MPAv1_NewWF_BGP_1_B.csv	305	Meta-Protein 894	Metagenome unknown	root	2	3	contig233000079_14	FTDAAEVADWAQRGGLTEAQAQIFNSNAGINR		MP_MPAv1_NewWF_BGP_1_B.csv
	MP_MPAv1_NewWF_BGP_1_B.csv	306	Meta-Protein 895	Metagenome unknown	root	2	3	contig139220000033_1	FGDSIDGDNVAFGIVADTKLQDGALVLQGEYVNR		MP_MPAv1_NewWF_BGP_1_B.csv
	MP_MPAv1_NewWF_BGP_1_B.csv	307	Meta-Protein 54	Metagenome unknown	root	4	12	contig14108000049_2, contig19385000007_1	IAVIDTGIDPDHPDLEAK, LPQAWAVTTGDPGVR, LTAVPDFDWVFLRWEGDVPEGEEEKNPITVVMDGPK		MP_MPAv1_NewWF_BGP_1_B.csv
	MP_MPAv1_NewWF_BGP_1_B.csv	308	Meta-Protein 896	Metagenome unknown	root	3	4	contig111000028_98	LEPFASPYAPFGVSSLQYK, NFVAAGGKDYTMIGDLAKWTTGDSFDPELALEYR		MP_MPAv1_NewWF_BGP_1_B.csv
	MP_MPAv1_NewWF_BGP_1_B.csv	309	Meta-Protein 897	Metagenome unknown	root	1	1	ATB_B_contig018393	SVMETPEYQEYLER		MP_MPAv1_NewWF_BGP_1_B.csv
	MP_MPAv1_NewWF_BGP_1_B.csv	310	Meta-Protein 55	Metagenome unknown	root	2	5	contig3586000030_17, contig139244000058_8	FGVLNIGTPKQADIMVVTGAVNYK		MP_MPAv1_NewWF_BGP_1_B.csv
	MP_MPAv1_NewWF_BGP_1_B.csv	311	Meta-Protein 898	Metagenome unknown	root	3	6	contig1699000011_2	AGDGNVILAGLDSK, DLGFIAPFNTFKDDEKPADPLAKNIFDLYIDNSITDR		MP_MPAv1_NewWF_BGP_1_B.csv
	MP_MPAv1_NewWF_BGP_1_B.csv	312	Meta-Protein 56	Metagenome unknown	root	4	12	contig121270000001_6, contig833000012_2	AIVVNQAVPGTVAAIR, HMAMPLLAK, IGIVTGTVSQGEDEYRGAEKMELSDLDAVK		MP_MPAv1_NewWF_BGP_1_B.csv
	MP_MPAv1_NewWF_BGP_1_B.csv	313	Meta-Protein 899	Metagenome unknown	root	1	1	contig139605000029_2	MTIFTPTYEVAPTSAELGK		MP_MPAv1_NewWF_BGP_1_B.csv
	MP_MPAv1_NewWF_BGP_1_B.csv	314	Meta-Protein 900	Metagenome unknown	root	3	4	contig11840000062_1	ANPDLGWTGVGGNKFEPTNPASAQMIYK, GLSEIADVAELTNADVATALVEGLKYQAAILYLR		MP_MPAv1_NewWF_BGP_1_B.csv
	MP_MPAv1_NewWF_BGP_1_B.csv	315	Meta-Protein 901	Metagenome unknown	root	1	2	contig1737000059_1	ATFTGDDPAVVNALR		MP_MPAv1_NewWF_BGP_1_B.csv
	MP_MPAv1_NewWF_BGP_1_B.csv	316	Meta-Protein 902	Metagenome unknown	root	1	2	contig15748000008_2	VPLPYAPDALEPVISK		MP_MPAv1_NewWF_BGP_1_B.csv
	MP_MPAv1_NewWF_BGP_1_B.csv	317	Meta-Protein 903	Metagenome unknown	root	3	6	contig26615000038_1	LFPVKDGYTFEPPFDTVTK, LNLEDDDAQYSVLKTAEDEVVTLTGTLSK		MP_MPAv1_NewWF_BGP_1_B.csv
	MP_MPAv1_NewWF_BGP_1_B.csv	318	Meta-Protein 904	Metagenome unknown	root	1	1	contig139432000056_11	FLDELVAR		MP_MPAv1_NewWF_BGP_1_B.csv
	MP_MPAv1_NewWF_BGP_1_B.csv	319	Meta-Protein 57	Metagenome unknown	root	7	21	contig13167000079_1, contig138985000072_30, contig42661000063_2	AIKDYFDGVDIPK, DIFTIGIDGNPDAIEDVSK, IAILEGVPGYHTTER, LAPDRESNFQAQVAMVEDMIQR, NVDAIAICAINDK, NVDAIALCAINDKTPTEIVDLDNWER		MP_MPAv1_NewWF_BGP_1_B.csv
	MP_MPAv1_NewWF_BGP_1_B.csv	320	Meta-Protein 905	Metagenome unknown	root	1	3	contig3085000059_14	ISEGNYLTAPATWEEK		MP_MPAv1_NewWF_BGP_1_B.csv
	MP_MPAv1_NewWF_BGP_1_B.csv	321	Meta-Protein 58	Metagenome unknown	root	3	7	contig645000003_1, contig209000035_25	VDAGLAEVFAQGK, VGQFVYELGPVVLKVNFDWDKNYLADTR		MP_MPAv1_NewWF_BGP_1_B.csv
	MP_MPAv1_NewWF_BGP_1_B.csv	322	Meta-Protein 906	Metagenome unknown	root	3	5	contig91000041_15	GNLFGTAPEDAVYAR, GTDALEGEEAAWMSDIILVKPGTEYRNPSFEQAVNLPLGWTPTR		MP_MPAv1_NewWF_BGP_1_B.csv
	MP_MPAv1_NewWF_BGP_1_B.csv	323	Meta-Protein 907	Metagenome unknown	root	1	1	contig765000008_8	IREIGQTIGEIVGGEAIHPSNPR		MP_MPAv1_NewWF_BGP_1_B.csv
	MP_MPAv1_NewWF_BGP_1_B.csv	324	Meta-Protein 59	CB23_SOLLC Chlorophyll a-b binding protein 13, chloroplastic OS=Solanum lycopersicum GN=CAB13 PE=1 SV=1	Streptophyta	1	3	P27489, Q9S7M0	VDFKEPVWFK		MP_MPAv1_NewWF_BGP_1_B.csv
	MP_MPAv1_NewWF_BGP_1_B.csv	325	Meta-Protein 60	Metagenome unknown	root	5	16	contig138944000072_3, contig139494000053_5	AGEIVVETYEGFR, AIEDFGIEVR, GVLGDDFPMEILDK, GVLGDDFPMEILDKVAELTEKQGAAYIDPEIQVLVAFAGSFSDPVR		MP_MPAv1_NewWF_BGP_1_B.csv
	MP_MPAv1_NewWF_BGP_1_B.csv	326	Meta-Protein 908	Metagenome unknown	root	3	6	contig28460000055_8	ALTGEQTIDQVIDYITK, ALTLILETGEGYSKFGLEDIPEIQNKR		MP_MPAv1_NewWF_BGP_1_B.csv
	MP_MPAv1_NewWF_BGP_1_B.csv	327	Meta-Protein 909	Metagenome unknown	root	2	4	contig29390000059_2	QLTAEVPLGDLGKYEAGPNLTAFYR		MP_MPAv1_NewWF_BGP_1_B.csv
	MP_MPAv1_NewWF_BGP_1_B.csv	328	Meta-Protein 910	Metagenome unknown	root	2	2	contig5743000014_9	ELAMAGAVFGEYEVVKVGFTGMAYQPVVAGEAK		MP_MPAv1_NewWF_BGP_1_B.csv
	MP_MPAv1_NewWF_BGP_1_B.csv	329	Meta-Protein 61	Metagenome unknown	root	1	1	contig139734000013_1, contig139946000046_28, contig7840000025_1, contig5156000023_3	GHFWIGNGPMYLEK		MP_MPAv1_NewWF_BGP_1_B.csv
	MP_MPAv1_NewWF_BGP_1_B.csv	330	Meta-Protein 62	Metagenome unknown	root	2	1	contig746000052_2, contig139636000014_13	TTASIQGFGNVAEYAARTTASLQGFGNVAEYAAR		MP_MPAv1_NewWF_BGP_1_B.csv
	MP_MPAv1_NewWF_BGP_1_B.csv	331	Meta-Protein 911	Metagenome unknown	root	6	9	contig139101000034_1	ASQTLAAIPNPDATTAYLAAIVAAR, EKQEEAIMFLIESAELR, FPYQEGMEVAELFMR, SNNAALAQLLVK, TNNFNDVLTNLQTAIQRVADGVITTSVLADALTTDPSFSDDNFQR		MP_MPAv1_NewWF_BGP_1_B.csv
	MP_MPAv1_NewWF_BGP_1_B.csv	332	Meta-Protein 63	Metagenome unknown	root	8	20	contig101000017_4, contig139681000053_2	AAEAYLTYAEAVVR, ADGGTTGDIEFPDTDVPFMR, ADLFQWIETELKEIEPEMYEPK, GASPIDGYTALQAINEIR, NWGSSIFLIDATR, QLTNIDKDGILDEWAR, TDGMPTWGTTGGWGGNRYLFMADNAGTIDGSTVNDAPK		MP_MPAv1_NewWF_BGP_1_B.csv
	MP_MPAv1_NewWF_BGP_1_B.csv	333	Meta-Protein 912	Metagenome unknown	root	2	5	contig3046000009_1	NTVLDFVENEVIPKTVFTPEEFDEIHLMIK		MP_MPAv1_NewWF_BGP_1_B.csv
	MP_MPAv1_NewWF_BGP_1_B.csv	334	Meta-Protein 913	Metagenome unknown	root	1	4	contig30533000059_2	HTAWVVGAGVNAVTEFK		MP_MPAv1_NewWF_BGP_1_B.csv
	MP_MPAv1_NewWF_BGP_1_B.csv	335	Meta-Protein 914	Metagenome unknown	root	1	1	contig138382000066_8	FIEFATSPEIQAK		MP_MPAv1_NewWF_BGP_1_B.csv
	MP_MPAv1_NewWF_BGP_1_B.csv	336	Meta-Protein 64	Metagenome unknown	root	5	14	contig29907000012_14, contig19471000054_1, contig24041000006_2	EDIMDVLQR, LAQAWSVTTGDKNIR, LDMTPGEYQFIAWIDVNK, NGNQIEIANSTPLPLKNGNQIEIANSTPLPLKGGQFR		MP_MPAv1_NewWF_BGP_1_B.csv
	MP_MPAv1_NewWF_BGP_1_B.csv	337	Meta-Protein 915	Metagenome unknown	root	2	7	contig104468000041_2	FVANYSTGTALEDASGVTLTATHRMDNNVLAQIDALTK		MP_MPAv1_NewWF_BGP_1_B.csv
	MP_MPAv1_NewWF_BGP_1_B.csv	338	Meta-Protein 65	Metagenome unknown	root	1	2	contig139487000030_15, contig139124000045_15	LRLEYLQEQVNWR		MP_MPAv1_NewWF_BGP_1_B.csv
	MP_MPAv1_NewWF_BGP_1_B.csv	339	Meta-Protein 916	Metagenome unknown	root	1	1	contig490000039_7	AQAMDALTSMSTVAGYK		MP_MPAv1_NewWF_BGP_1_B.csv
	MP_MPAv1_NewWF_BGP_1_B.csv	340	Meta-Protein 917	Metagenome unknown	root	1	1	contig67676000039_8	AQSMDALTSMSTVAGYK		MP_MPAv1_NewWF_BGP_1_B.csv
	MP_MPAv1_NewWF_BGP_1_B.csv	341	Meta-Protein 918	Metagenome unknown	root	2	2	contig39175000035_2	LIEQASETAIANMAAIMGRWDAMTASTLDYTPK		MP_MPAv1_NewWF_BGP_1_B.csv
	MP_MPAv1_NewWF_BGP_1_B.csv	342	Meta-Protein 919	Metagenome unknown	root	1	1	contig139148000015_9	IGGLGPLTGDAATYGQSVK		MP_MPAv1_NewWF_BGP_1_B.csv
	MP_MPAv1_NewWF_BGP_1_B.csv	343	Meta-Protein 920	Metagenome unknown	root	1	1	contig139920000046_24	GAETFYEAIQMGAEIYHVLGK		MP_MPAv1_NewWF_BGP_1_B.csv
	MP_MPAv1_NewWF_BGP_1_B.csv	344	Meta-Protein 921	Metagenome unknown	root	1	1	contig53608000063_4	VVGTDPQSDIALLK		MP_MPAv1_NewWF_BGP_1_B.csv
	MP_MPAv1_NewWF_BGP_1_B.csv	345	Meta-Protein 922	Metagenome unknown	root	1	1	contig263000057_5	GYGFIECEDGEDVFVHFTAIQGSGFR		MP_MPAv1_NewWF_BGP_1_B.csv
	MP_MPAv1_NewWF_BGP_1_B.csv	346	Meta-Protein 923	Metagenome unknown	root	1	1	contig139799000013_15	QTEFTTIAIHGWDSADAQAR		MP_MPAv1_NewWF_BGP_1_B.csv
	MP_MPAv1_NewWF_BGP_1_B.csv	347	Meta-Protein 924	Metagenome unknown	root	2	2	contig139154000040_6	IYSLAAPVDEIISYYEDKNVATTMAYLMNVDEASSR		MP_MPAv1_NewWF_BGP_1_B.csv
	MP_MPAv1_NewWF_BGP_1_B.csv	348	Meta-Protein 925	Metagenome unknown	root	1	1	ATB_S_contig050613	YVIGVDFGTDSAR		MP_MPAv1_NewWF_BGP_1_B.csv
	MP_MPAv1_NewWF_BGP_1_B.csv	349	Meta-Protein 66	MCRG_METBF Methyl-coenzyme M reductase subunit gamma OS=Methanosarcina barkeri (strain Fusaro / DSM 804) GN=mcrG PE=1 SV=3	root	10	76	P07964, contig1068000023_29, contig9000014_11	APGSDYPSTHPPLAEMGEPACSIR, EISDEDLTAILGHR, LEGGTIIMDKDQVAIPLDR, LQEDGVMFDMLDR, LREISDEDLTAILGHR, QFYPGATSVAENR, RLEGGTIIMDKDQVAIPLDR, VDNVPFRDDAEVIEWVQR, VQMETEITDPALSGMRYVQFTDSMYNAPATPYFR		MP_MPAv1_NewWF_BGP_1_B.csv
	MP_MPAv1_NewWF_BGP_1_B.csv	350	Meta-Protein 67	Metagenome unknown	root	1	2	contig102134000047_1, contig3601000013_3	VAVLEEGIGGWK		MP_MPAv1_NewWF_BGP_1_B.csv
	MP_MPAv1_NewWF_BGP_1_B.csv	351	Meta-Protein 926	Metagenome unknown	root	2	5	contig575000028_1	DAFAVVGLPLDFLSRSGPVQAVDGVSFQLQQGR		MP_MPAv1_NewWF_BGP_1_B.csv
	MP_MPAv1_NewWF_BGP_1_B.csv	352	Meta-Protein 927	Metagenome unknown	root	1	2	ATB_S_contig029321	AGGVLPTGDPSAIAITR		MP_MPAv1_NewWF_BGP_1_B.csv
	MP_MPAv1_NewWF_BGP_1_B.csv	353	Meta-Protein 928	Metagenome unknown	root	1	5	contig808000043_6	GVVDPEMFVINYDQYIER		MP_MPAv1_NewWF_BGP_1_B.csv
	MP_MPAv1_NewWF_BGP_1_B.csv	354	Meta-Protein 68	Metagenome unknown	root	1	3	contig56388000052_5, contig138000059_9	IGATNTIFWAR		MP_MPAv1_NewWF_BGP_1_B.csv
	MP_MPAv1_NewWF_BGP_1_B.csv	355	Meta-Protein 69	Metagenome unknown	root	2	6	contig208000026_5, contig2291000020_3	GAAAELHNVDFMDMIHRSMDVFVDAIAENEALIGR		MP_MPAv1_NewWF_BGP_1_B.csv
	MP_MPAv1_NewWF_BGP_1_B.csv	356	Meta-Protein 929	Metagenome unknown	root	1	1	contig36991000053_4	GNPTVEVDVYTESGAFGR		MP_MPAv1_NewWF_BGP_1_B.csv
	MP_MPAv1_NewWF_BGP_1_B.csv	357	Meta-Protein 70	Metagenome unknown	root	5	12	contig138577000042_15, contig139375000056_14	ADSAGFFDENGEPIINRPYLVR, DIAPATVFYRK, DTDGDGHPDHWMLADAGEIVGIMR, IGAWSTEWTEAIARLFSSWEGFVDVAR		MP_MPAv1_NewWF_BGP_1_B.csv
	MP_MPAv1_NewWF_BGP_1_B.csv	358	Meta-Protein 71	Metagenome unknown	root	3	4	contig2454000064_24, contig12939000026_2	FEGPTIMVYGR, FEGPTLMVYGRIVVDDYYTTSGGYSQER		MP_MPAv1_NewWF_BGP_1_B.csv
	MP_MPAv1_NewWF_BGP_1_B.csv	359	Meta-Protein 930	Metagenome unknown	root	1	1	contig17819000017_2	SGIADNLQLSLPFR		MP_MPAv1_NewWF_BGP_1_B.csv
	MP_MPAv1_NewWF_BGP_1_B.csv	360	Meta-Protein 931	Metagenome unknown	root	1	1	contig1629000027_1	LIESQIIGYAYR		MP_MPAv1_NewWF_BGP_1_B.csv
	MP_MPAv1_NewWF_BGP_1_B.csv	361	Meta-Protein 72	ACDB1_METMA Acetyl-CoA decarbonylase/synthase complex subunit beta 1 OS=Methanosarcina mazei (strain ATCC BAA-159 / DSM 3647 / Goe1 / Go1 / JCM 11833 / OCM 88) GN=cdhC1 PE=3 SV=1	root	9	36	Q8PZ11, Q9V2Z4, Q8TJC4, contig5383000018_29, P72021, Q8PV85, Q8TRZ6	AEFPFEISPMFEGER, DTAAKLDSLEPFGK, EYQGMAPNGIGFSTMAGQTGGGK, EYQGMAPNGLGFSTMAGQTGGGK, IATEKDVTDIESLK, KEGMFVELGGPK, MQVTFYTDQAEVEK, VHDFINYCQGIMHLNQRVSLCGAINWFDGR		MP_MPAv1_NewWF_BGP_1_B.csv
	MP_MPAv1_NewWF_BGP_1_B.csv	362	Meta-Protein 73	Metagenome unknown	root	5	8	contig2040000001_4, ATB_S_contig025572	AAFDNIVSYIEYAK, ALYEAAGNFYVNDKPTGAVVSQQPFGGAR, FNTYYMEEIYR, LGQFHQAGPEEVQAAIEAALRSNAIFQMPRPENEPVFNYAPGSPEK		MP_MPAv1_NewWF_BGP_1_B.csv
	MP_MPAv1_NewWF_BGP_1_B.csv	363	Meta-Protein 932	Metagenome unknown	root	1	1	ATB_S_contig101421	WNYDITTNTVLK		MP_MPAv1_NewWF_BGP_1_B.csv
	MP_MPAv1_NewWF_BGP_1_B.csv	364	Meta-Protein 933	Metagenome unknown	root	2	2	contig139244000058_11	ADKTWEINLFRETVKVSVPIVDKPK		MP_MPAv1_NewWF_BGP_1_B.csv
	MP_MPAv1_NewWF_BGP_1_B.csv	365	Meta-Protein 934	Metagenome unknown	root	1	3	contig138565000018_15	IYLDTHPNDQEALDYWR		MP_MPAv1_NewWF_BGP_1_B.csv
	MP_MPAv1_NewWF_BGP_1_B.csv	366	Meta-Protein 74	Metagenome unknown	root	6	12	ATB_S_contig168501, contig561000051_2, contig835000067_21	APETREEFLDYVR, SAAFFSPEGVEALR, SVVDSEEFAALTEQFEFAK, TGAPPGVVVLSPNDYFR, WLSDNSIEWAKWLSDNSLEWAK		MP_MPAv1_NewWF_BGP_1_B.csv
	MP_MPAv1_NewWF_BGP_1_B.csv	367	Meta-Protein 935	Metagenome unknown	root	4	10	contig7628000065_1	ATYALADGVDTSFEVGYK, FDGAGWIQLER, VGAAYTLGDWTFDGWYRWSNEGVDLDPDPESEKLSDGFAK		MP_MPAv1_NewWF_BGP_1_B.csv
	MP_MPAv1_NewWF_BGP_1_B.csv	368	Meta-Protein 936	Metagenome unknown	root	1	1	contig2507000023_3	VSPSPVLVESLIEAYTPMGITAENVAER		MP_MPAv1_NewWF_BGP_1_B.csv
	MP_MPAv1_NewWF_BGP_1_B.csv	369	Meta-Protein 937	Metagenome unknown	root	1	1	contig54000060_21	ETTDLTLIMADSGERYDLSAIEHLK		MP_MPAv1_NewWF_BGP_1_B.csv
	MP_MPAv1_NewWF_BGP_1_B.csv	370	Meta-Protein 75	Metagenome unknown	root	4	15	contig139433000067_12, contig158000024_19, contig3368000033_1	NLASAVISHIAR, TLIGQTSGESYMLEFK, TLIGQTSGESYMLEFKNPGQKVTGQGNCFFAELAK		MP_MPAv1_NewWF_BGP_1_B.csv
	MP_MPAv1_NewWF_BGP_1_B.csv	371	Meta-Protein 938	Metagenome unknown	root	1	2	contig42239000023_2	NALIQYGEYLER		MP_MPAv1_NewWF_BGP_1_B.csv
	MP_MPAv1_NewWF_BGP_1_B.csv	372	Meta-Protein 939	Metagenome unknown	root	1	1	contig125000052_2	LVISQTASKMNIGFNTGEGGVLHEER		MP_MPAv1_NewWF_BGP_1_B.csv
	MP_MPAv1_NewWF_BGP_1_B.csv	373	Meta-Protein 940	Metagenome unknown	root	1	1	contig83000016_100	VDEALAVVGMSEYAESPPHSLSGGQK		MP_MPAv1_NewWF_BGP_1_B.csv
	MP_MPAv1_NewWF_BGP_1_B.csv	374	Meta-Protein 76	Metagenome unknown	root	2	2	contig1476000022_6, contig139021000050_12	EYDAAQLGALAIKVNVNGSAIAYGHPIGSSGAR		MP_MPAv1_NewWF_BGP_1_B.csv
	MP_MPAv1_NewWF_BGP_1_B.csv	375	Meta-Protein 941	Metagenome unknown	root	1	1	contig2000037_3	YFATAPSLFGDVEHAREAAEGLLIAR		MP_MPAv1_NewWF_BGP_1_B.csv
	MP_MPAv1_NewWF_BGP_1_B.csv	376	Meta-Protein 942	Metagenome unknown	root	1	2	contig7007000027_1	SYPISTYAIAGDYVK		MP_MPAv1_NewWF_BGP_1_B.csv
	MP_MPAv1_NewWF_BGP_1_B.csv	377	Meta-Protein 943	Metagenome unknown	root	2	3	contig138801000055_16	HDGMFYLGEPMIEGFSQIRYGVTQALLDAAAK		MP_MPAv1_NewWF_BGP_1_B.csv
	MP_MPAv1_NewWF_BGP_1_B.csv	378	Meta-Protein 944	RL20_ENTFA 50S ribosomal protein L20 OS=Enterococcus faecalis (strain ATCC 700802 / V583) GN=rplT PE=3 SV=1	Enterococcus faecalis V583	1	1	Q837C7	MLADLAVNDAAAFTALAEQAK		MP_MPAv1_NewWF_BGP_1_B.csv
	MP_MPAv1_NewWF_BGP_1_B.csv	379	Meta-Protein 77	Metagenome unknown	root	6	16	contig3594000043_8, contig279000074_7	EADILVLTVPLPAQK, EGAAGKPLLDATGPLEATIGGSPTR, FAQAGEEVIIGSR, FIILPDGSAAQR, GAENPDAAKEADILVLTVPLPAQKIGVIGGTGGQGLGIAVR		MP_MPAv1_NewWF_BGP_1_B.csv
	MP_MPAv1_NewWF_BGP_1_B.csv	380	Meta-Protein 945	Metagenome unknown	root	1	1	contig12669000038_1	DGEALEGDISEYGSLK		MP_MPAv1_NewWF_BGP_1_B.csv
	MP_MPAv1_NewWF_BGP_1_B.csv	381	Meta-Protein 78	Metagenome unknown	root	1	2	contig3401000048_1, ATB_G30_contig005791	LGDAENPLLVSVR		MP_MPAv1_NewWF_BGP_1_B.csv
	MP_MPAv1_NewWF_BGP_1_B.csv	382	Meta-Protein 79	MCRB_METBF Methyl-coenzyme M reductase subunit beta OS=Methanosarcina barkeri (strain Fusaro / DSM 804) GN=mcrB PE=1 SV=3	root	13	61	P07955, contig1068000023_32	AAQNVSSTLLYFNDILEK, AAQNVSSTLLYFNDILEKETGLPGCDYGK, AIEDGIISVDK, AIEDGIISVDKTAPSGYK, ANDVPMWNACAAVGTLAATMVNCGAGR, DGTIGTVIESVVR, ENGKDGTIGTVIESVVR, GLNYDLTGNAEAIAESVK, GLNYDLTGNAEAIAESVKNYVQVDEGDDTEVK, NYVQVDEGDDTEVKIVK, RAIEDGIISVDK, RAIEDGIISVDKTAPSGYKSVAVNLAGIQGALASGK		MP_MPAv1_NewWF_BGP_1_B.csv
	MP_MPAv1_NewWF_BGP_1_B.csv	383	Meta-Protein 946	Metagenome unknown	root	2	2	contig7080000032_13	TPVKPWQEGMVVFTVEDRVAADVVSMDSSLPLK		MP_MPAv1_NewWF_BGP_1_B.csv
	MP_MPAv1_NewWF_BGP_1_B.csv	384	Meta-Protein 947	Metagenome unknown	root	1	1	contig5925000073_13	EIGQTIGEIVGGEAIHPSNPR		MP_MPAv1_NewWF_BGP_1_B.csv
	MP_MPAv1_NewWF_BGP_1_B.csv	385	Meta-Protein 948	Metagenome unknown	root	1	1	contig601000058_31	TSLWDDQWAADQGPAGK		MP_MPAv1_NewWF_BGP_1_B.csv
	MP_MPAv1_NewWF_BGP_1_B.csv	386	Meta-Protein 949	Metagenome unknown	root	1	2	contig139849000004_48	VGQTTADNLFTLEATR		MP_MPAv1_NewWF_BGP_1_B.csv
	MP_MPAv1_NewWF_BGP_1_B.csv	387	Meta-Protein 950	Metagenome unknown	root	1	4	contig583000026_6	EFGDALVGAYGGVR		MP_MPAv1_NewWF_BGP_1_B.csv
	MP_MPAv1_NewWF_BGP_1_B.csv	388	Meta-Protein 951	Metagenome unknown	root	1	1	contig472000042_11	FGQPETGLGITPGFGGTQR		MP_MPAv1_NewWF_BGP_1_B.csv
	MP_MPAv1_NewWF_BGP_1_B.csv	389	Meta-Protein 952	Metagenome unknown	root	2	3	contig138911000003_2	IAVLAVPADAAQDVANRVGTSVEGIPISSLEEIPR		MP_MPAv1_NewWF_BGP_1_B.csv
	MP_MPAv1_NewWF_BGP_1_B.csv	390	Meta-Protein 953	Metagenome unknown	root	1	1	contig138978000039_11	AQEVGLPVIVVNSK		MP_MPAv1_NewWF_BGP_1_B.csv
	MP_MPAv1_NewWF_BGP_1_B.csv	391	Meta-Protein 80	Metagenome unknown	root	3	5	ATB_B_contig138321, contig139053000050_14	IVTFAEDNNVDMIVVGSLGK, QILIATDGSETANEAADFAMEMFGCSGAKVYAVYVIDTTPYR		MP_MPAv1_NewWF_BGP_1_B.csv
	MP_MPAv1_NewWF_BGP_1_B.csv	392	Meta-Protein 954	Metagenome unknown	root	1	1	contig18000031_17	TVPTDATSTVLEHFK		MP_MPAv1_NewWF_BGP_1_B.csv
	MP_MPAv1_NewWF_BGP_1_B.csv	393	Meta-Protein 955	Metagenome unknown	root	1	1	contig139826000013_3	QVELFTLELGQGHR		MP_MPAv1_NewWF_BGP_1_B.csv
	MP_MPAv1_NewWF_BGP_1_B.csv	394	Meta-Protein 956	Metagenome unknown	root	1	2	contig129517000039_19	HGETIFQYMLSK		MP_MPAv1_NewWF_BGP_1_B.csv
	MP_MPAv1_NewWF_BGP_1_B.csv	395	Meta-Protein 81	Metagenome unknown	root	6	25	contig8738000040_2, contig112698000033_1	GINAFALGVR, LPDVETVYVENVPESSDAER, MTESNLVGYVAAMPIPEVVR, TAENVGIYFGR, VFEGPIKDNQGVLRVVWTNTWYDPAR		MP_MPAv1_NewWF_BGP_1_B.csv
	MP_MPAv1_NewWF_BGP_1_B.csv	396	Meta-Protein 957	Metagenome unknown	root	1	2	contig38754000060_1	EFALLGQVQGDTR		MP_MPAv1_NewWF_BGP_1_B.csv
	MP_MPAv1_NewWF_BGP_1_B.csv	397	Meta-Protein 958	Metagenome unknown	root	1	1	contig139685000013_10	YLDINVGPSSTEPVEAMK		MP_MPAv1_NewWF_BGP_1_B.csv
[truncated: 26,143 more rows]

## Sheet: COPY Raw MP MPAv2
Content	Name	Custom.Meta-Protein No.	Custom.Meta-Protein Accession	Custom.Meta-Protein Description	Custom.Meta-Protein Taxonomy	Custom.Superkingdom	Custom.Kingdom	Custom.Phylum	Custom.Class	Custom.Order	Custom.Family	Custom.Genus	Custom.Species	Custom.Meta-Protein UniRef100	Custom.Meta-Protein UniRef90	Custom.Meta-Protein UniRef50	Custom.Meta-Protein KO	Custom.Meta-Protein EC	Custom.Peptide Count	Custom.Spectral Count	Custom.Proteins	Custom.Peptides	Custom.	Custom.filename
[truncated: 24,775 more rows]

[truncated: 3 more sheets: Count MP MPAv1, Count MP MPAv2, Summary Table]
