# Supplementary material for: A Robust and Universal Metaproteomics Workflow for Research Studies and Routine Diagnostics Within 24 h Using Phenol Extraction, FASP Digest, and the MetaProteomeAnalyzer
Source: Front Microbiol. 2019 Aug 16;10:1883. doi: 10.3389/fmicb.2019.01883 (PMC6707425; doi:10.3389/fmicb.2019.01883)
Supplement: TABLE S15 — Number of identified KOs and ECs. [file Table_15.XLSX]

## Sheet: DESCRIPTION
General description
This file compares the number of identified KO- and EC numbers for all samples.
Overview table sheets
Table	Content
OUTPUT_DATA_COMPARE	A copy of the metaprotein profiles from the compare panel.
NonRedundant KOs	This tables has a non-redundant list of all non-redundant KO numbers and queries for all KO numbers of all samples the corresponding spectral counts.
NonRedundant ECs	This tables has a non-redundant list of all non-redundant EC-numbers and queries for all EC-numbers of all samples the corresponding spectral counts.
SUMMARY_Figure	This worksheets comprises the final figure and two-tailed Ttests (inhomoge variances)
Table sheet description/legend
OUTPUT_DATA_COMPARE
This table sheet contains the results of the MPA compare panel imported into Excel, metaproteins are created considering the spectra of all samples resulting in a consistent comparison table
Column	Description
Metaprotein number	The number of the metaprotein.
Description	The description of the metaprotein.
Ontologies	The list of all ontologies for a metaprotein.
EC_numbers_reformatted	Copy of "EC-numbers" with ";" before and afterwards. Required format for later query of the Ecs
EC-numbers	The list of all EC-numbers for a metaprotein.
KO_reformatted	Copy of "KO-numbers" with ";" before and afterwards. Required format for later query of the KOs
KO-numbers	The list of all KO numbers for a metaprotein.
UniRef50	The UniRef50 cluster ID.
UniRef90	The UniRef50 cluster ID.
UniRef100	The UniRef100 cluster ID.
Superkingdom	The NCBI taxonomy on superkingdom level.
Kingdom	The NCBI taxonomy on kingdom level.
Phylum	The NCBI taxonomy on phylum level.
Class	The NCBI taxonomy on class level.
Order	The NCBI taxonomy on order level.
Family	The NCBI taxonomy on family level.
Genus	The NCBI taxonomy on genus level.
Species	The NCBI taxonomy on species level.
Subspecies	The NCBI taxonomy on subspecies level.
SUM	Sum of all spectra over all samples
SAMPLES	Sample BGP1-3, Hgut1-3, Soil, Compost, WWTP for the old and new workflow with the corresponding spectral abundance.
NonRedundant KOs
This tables has a non-redundant list of all non-redundant KO numbers and queries for all KO numbers of all samples the corresponding spectral counts. A summary could be found in the last row. The number of identified KO numbers is calculated as the number of all KOs minus the "0" entries for each sample.
Column	Description
KO-numbers	non-redundant list of all KOs (multiple KOs were splitted in single KO numbers)
Sum (this sheet)	Sum of all spectra of all samples from this sheet (Quality Control 1)
Sum(Output_DATA_COMPARE)	Sum of all spectra of all samples from the Sheet "Output_DATA_CONTROL" (Quality Control 2)
SAMPLES	Sample BGP1-3, Hgut1-3, Soil, Compost, WWTP for the old and new workflow with the corresponding spectral abundance.
NonRedundant ECs
This tables has a non-redundant list of all non-redundant EC numbers and queries for all EC numbers of all samples the corresponding spectral counts. A summary could be found in the last row. The number of identified EC numbers is calculated as the number of all ECs minus the "0" entries for each sample.
Column	Description
EC-numbers	non-redundant list of all KOs (multiple KOs were splitted in single KO numbers)
Sum (this sheet)	Sum of all spectra of all samples from this sheet (Quality Control 1)
Sum(Output_DATA_COMPARE)	Sum of all spectra of all samples from the Sheet "Output_DATA_CONTROL" (Quality Control 2)
SAMPLES	Sample BGP1-3, Hgut1-3, Soil, Compost, WWTP for the old and new workflow with the corresponding spectral abundance.
Summary Figure
This worksheets comprises the final figure and two-tailed Ttests (inhomoge variances)
Elements	Description
1. List of all KOs and ECs	Copy of summary row (last row) from the worksheets "NonRedundant_KOs" and "NonRedundant_ECs".
2. Input data and plot for EC-numbers	Dot plot with average values. Extra column is required for a proper format. Two-tailed Ttest is calculated assuming unequal variances.
3. Input data and plot for KO-numbers	Dot plot with average values. Extra column is required for a proper format. Two-tailed Ttest is calculated assuming unequal variances.

## Sheet: OUTPUT_DATA_COMPARE
Metaprotein number	Description	Ontologies	EC_numbers_reformatted	EC-numbers	KO_reformatted	KO-numbers	UniRef50	UniRef90	UniRef100	Superkingdom	Kingdom	Phylum	Class	Order	Family	Genus	Species	Subspecies	Sum	NewWF_BGP_1_A	NewWF_BGP_1_B	NewWF_BGP_1_C	NewWF_BGP_2_A	NewWF_BGP_2_B	NewWF_BGP_2_C	NewWF_BGP_3_A	NewWF_BGP_3_B	NewWF_BGP_3_C	OldWF_BGP_1_A	OldWF_BGP_1_B	OldWF_BGP_1_C	OldWF_BGP_2_B	OldWF_BGP_2_C	OldWF_BGP_2_A	OldWF_BGP_3_A	OldWF_BGP_3_B	OldWF_BGP_3_C	NewWF_Hgut_1_A	NewWF_Hgut_1_B	NewWF_Hgut_1_C	NewWF_Hgut_2_A	NewWF_Hgut_2_B	NewWF_Hgut_2_C	NewWF_Hgut_3_A	NewWF_Hgut_3_B	NewWF_Hgut_3_C	OldWF_Hgut_1_A	OldWF_Hgut_1_B	OldWF_Hgut_1_C
Meta-Protein 252	Metagenome unknown		;;		;;					Uncategorized	Uncategorized	unknown	Uncategorized	Uncategorized	Uncategorized	Uncategorized	Uncategorized	Uncategorized	222	15	16	12	16	14	10	13	17	4	32	17	16	7	5	6	7	9	6	0	0	0	0	0	0	0	0	0	0	0	0
Meta-Protein 3082	BLAST_GLUA_DICDI Lysosomal beta glucosidase OS=Dictyostelium discoideum GN=gluA PE=1 SV=2_Q23892	Complete proteome;Direct protein sequencing;Glycoprotein;Glycosidase;Hydrolase;Lysosome;Reference proteome;Signal;	;3.2.1.21;;	3.2.1.21;	;K05349;;	K05349;	UniRef50_Q23892	UniRef90_Q23892	UniRef100_Q23892	Eukaryota	Dictyostelium discoideum	unknown	Dictyostelium discoideum	Dictyosteliida	Dictyostelium discoideum	Dictyostelium	Dictyostelium discoideum	Dictyostelium discoideum	29	4	3	4	5	5	2	0	0	1	5	0	0	0	0	0	0	0	0	0	0	0	0	0	0	0	0	0	0	0	0
Meta-Protein 844	BLAST_SUSA_BACTN Neopullulanase SusA OS=Bacteroides thetaiotaomicron (strain ATCC 29148 / DSM 2079 / NCTC 10582 / E50 / VPI-5482) GN=susA PE=3 SV=1_Q8A1G0	Carbohydrate metabolism;Complete proteome;Glycosidase;Hydrolase;Metal-binding;Periplasm;Polysaccharide degradation;Reference proteome;Signal;	;3.2.1.135;;	3.2.1.135;	;K21575;;	K21575;	UniRef50_Q8A1G0	UniRef90_Q8A1G0	UniRef100_Q8A1G0	Bacteria	Bacteroides thetaiotaomicron VPI-5482	unknown	Bacteroidia	Bacteroidales	Bacteroidaceae	Bacteroides	Bacteroides thetaiotaomicron	Bacteroides thetaiotaomicron VPI-5482	1	0	1	0	0	0	0	0	0	0	0	0	0	0	0	0	0	0	0	0	0	0	0	0	0	0	0	0	0	0	0
Meta-Protein 2873	Metagenome unknown		;;		;;					Uncategorized	Uncategorized	unknown	Uncategorized	Uncategorized	Uncategorized	Uncategorized	Uncategorized	Uncategorized	60	7	6	7	8	7	5	4	3	1	2	2	3	1	1	1	1	0	1	0	0	0	0	0	0	0	0	0	0	0	0
Meta-Protein 3732	ABCB5_DICDI ABC transporter B family member 5 OS=Dictyostelium discoideum GN=abcB5 PE=3 SV=1	ATP-binding;Complete proteome;Membrane;Nucleotide-binding;Reference proteome;Transmembrane;Transmembrane helix;Transport;	;;;	;	;K05662;;	K05662;	UniRef50_Q8T9W2	UniRef90_Q8T9W2	UniRef100_Q8T9W2	Eukaryota	Dictyostelium discoideum	unknown	Dictyostelium discoideum	Dictyosteliida	Dictyostelium discoideum	Dictyostelium	Dictyostelium discoideum	Dictyostelium discoideum	1	0	0	0	1	0	0	0	0	0	0	0	0	0	0	0	0	0	0	0	0	0	0	0	0	0	0	0	0	0	0
Meta-Protein 4760	BLAST_GRIR_STRM4 Beta sliding clamp homolog GriR OS=Streptomyces muensis GN=griR PE=1 SV=1_A0A0E3URH8	Antibiotic resistance;Cytoplasm;DNA replication;DNA-binding;DNA-directed DNA polymerase;Nucleotidyltransferase;Transferase;	;;;	;	;;;	;	UniRef50_A0A0E3URH8	UniRef90_A0A0E3URH8	UniRef100_A0A0E3URH8	Bacteria	Streptomyces sp. MBRL 179	unknown	Actinobacteria	Actinomycetales	Streptomycetaceae	Streptomyces	Streptomyces sp. MBRL 179	Streptomyces sp. MBRL 179	1	0	0	0	0	0	0	0	0	0	0	0	0	0	0	0	0	0	0	0	0	0	0	0	1	0	0	0	0	0	0
Meta-Protein 4510	BLAST_RPIB_ECOLI Ribose-5-phosphate isomerase B OS=Escherichia coli (strain K12) GN=rpiB PE=1 SV=2_P37351	3D-structure;Carbohydrate metabolism;Complete proteome;Isomerase;Reference proteome;	;5.3.1.6;;	5.3.1.6;	;K01808;;	K01808;	UniRef50_P37351	UniRef90_P37351	UniRef100_P37351	Bacteria	Escherichia coli K-12	unknown	Gammaproteobacteria	Enterobacteriales	Enterobacteriaceae	Escherichia	Escherichia coli	Escherichia coli K-12	1	0	0	0	0	0	0	0	0	0	0	0	0	0	0	0	0	0	0	0	1	0	0	0	0	0	0	0	0	0	0
Meta-Protein 2334	BLAST_MCCA_SHEON Dissimilatory sulfite reductase SirA OS=Shewanella oneidensis (strain MR-1) GN=sirA PE=1 SV=2_Q8EJI6	Complete proteome;Copper;Electron transport;Heme;Iron;Metal-binding;Oxidoreductase;Periplasm;Reference proteome;Signal;Sulfate respiration;Transport;	;1.8.99.-;;	1.8.99.-;	;;;	;	UniRef50_Q8EJI6	UniRef90_Q8EJI6	UniRef100_Q8EJI6	Bacteria	Shewanella oneidensis MR-1	unknown	Gammaproteobacteria	Alteromonadales	Shewanellaceae	Shewanella	Shewanella oneidensis	Shewanella oneidensis MR-1	15	0	0	0	0	0	0	0	0	0	0	0	0	0	0	0	0	0	0	0	0	0	0	0	0	7	4	3	0	0	0
Meta-Protein 5187	BLAST_YJCS_ECOLI Putative alkyl/aryl-sulfatase YjcS OS=Escherichia coli (strain K12) GN=yjcS PE=1 SV=2_P32717	3D-structure;Complete proteome;Hydrolase;Reference proteome;Signal;	;3.1.6.-;;	3.1.6.-;	;;;	;	UniRef50_P32717	UniRef90_P32717	UniRef100_P32717	Bacteria	Escherichia coli K-12	unknown	Gammaproteobacteria	Enterobacteriales	Enterobacteriaceae	Escherichia	Escherichia coli	Escherichia coli K-12	1	0	0	0	0	0	0	0	0	0	0	0	0	0	0	0	0	0	0	0	0	0	0	0	0	0	0	0	0	0	0
Meta-Protein 2762	Metagenome unknown		;;		;;					Uncategorized	Uncategorized	unknown	Uncategorized	Uncategorized	Uncategorized	Uncategorized	Uncategorized	Uncategorized	29	4	3	2	2	2	3	6	4	2	1	0	0	0	0	0	0	0	0	0	0	0	0	0	0	0	0	0	0	0	0
Meta-Protein 4997	BLAST_HTRA_SYNY3 Putative serine protease HtrA OS=Synechocystis sp. (strain PCC 6803 / Kazusa) GN=htrA PE=1 SV=1_P73354	Cell outer membrane;Complete proteome;Hydrolase;Membrane;Protease;Reference proteome;Transmembrane;Transmembrane helix;	;;;	;	;;;	;	UniRef50_P73354	UniRef90_P73354	UniRef100_P73354	Bacteria	Synechocystis sp. PCC 6803 substr. Kazusa	unknown	Synechocystis sp. PCC 6803 substr. Kazusa	Chroococcales	Synechocystis sp. PCC 6803 substr. Kazusa	Synechocystis	Synechocystis sp. PCC 6803	Synechocystis sp. PCC 6803 substr. Kazusa	1	0	0	0	0	0	0	0	0	0	0	0	0	0	0	0	0	0	0	0	0	0	0	0	0	0	0	0	0	0	0
Meta-Protein 4328	BLAST_HSP16_ONYPE Probable Hsp20 family chaperone OS=Onion yellows phytoplasma (strain OY-M) GN=PAM_028 PE=1 SV=1_P81958	Chaperone;Complete proteome;Direct protein sequencing;Reference proteome;	;;;	;	;;;	;	UniRef50_P81958	UniRef90_P81958	UniRef100_P81958	Bacteria	Onion yellows phytoplasma OY-M	unknown	Mollicutes	Acholeplasmatales	Acholeplasmataceae	Candidatus Phytoplasma	Onion yellows phytoplasma	Onion yellows phytoplasma OY-M	2	0	0	0	0	0	0	0	0	0	0	0	0	0	0	0	0	0	0	1	0	0	0	0	0	0	0	0	0	1	0
Meta-Protein 4023	BLAST_HPR_THEMA Hydroxypyruvate reductase OS=Thermotoga maritima (strain ATCC 43589 / MSB8 / DSM 3109 / JCM 10099) GN=TM_1401 PE=1 SV=1_Q9X1C1	Complete proteome;NAD;Oxidoreductase;Reference proteome;	;1.1.1.81;;	1.1.1.81;	;K00058;;	K00058;	UniRef50_Q9X1C1	UniRef90_Q9X1C1	UniRef100_Q9X1C1	Bacteria	Thermotoga maritima MSB8	unknown	Thermotogae	Thermotogales	Thermotogaceae	Thermotoga	Thermotoga maritima	Thermotoga maritima MSB8	1	0	0	0	0	0	0	1	0	0	0	0	0	0	0	0	0	0	0	0	0	0	0	0	0	0	0	0	0	0	0
Meta-Protein 2135	BLAST_PHSM_STRPN Maltodextrin phosphorylase OS=Streptococcus pneumoniae serotype 4 (strain ATCC BAA-334 / TIGR4) GN=malP PE=3 SV=2_P29849	Allosteric enzyme;Carbohydrate metabolism;Complete proteome;Glycosyltransferase;Pyridoxal phosphate;Transferase;	;2.4.1.1;;	2.4.1.1;	;K00688;;	K00688;	UniRef50_P29849	UniRef90_P29849	UniRef100_P29849	Bacteria	Streptococcus pneumoniae TIGR4	unknown	Bacilli	Lactobacillales	Streptococcaceae	Streptococcus	Streptococcus pneumoniae	Streptococcus pneumoniae TIGR4	1	0	0	0	0	0	0	0	0	0	0	0	0	0	0	0	0	0	0	0	0	0	1	0	0	0	0	0	0	0	0
Meta-Protein 4190	BLAST_OPPA_BACSU Oligopeptide-binding protein OppA OS=Bacillus subtilis (strain 168) GN=oppA PE=1 SV=1_P24141	Cell membrane;Competence;Complete proteome;Lipoprotein;Membrane;Palmitate;Peptide transport;Phosphoprotein;Protein transport;Reference proteome;Signal;Sporulation;Transport;	;;;	;	;K15580;;	K15580;	UniRef50_P24141	UniRef90_P24141	UniRef100_P24141	Bacteria	Bacillus subtilis subsp. subtilis str. 168	unknown	Bacilli	Bacillales	Bacillaceae	Bacillus	Bacillus subtilis subsp. subtilis str. 168	Bacillus subtilis subsp. subtilis	2	0	0	0	0	0	0	0	0	0	2	0	0	0	0	0	0	0	0	0	0	0	0	0	0	0	0	0	0	0	0
Meta-Protein 639	BLAST_RS4_GEOSW 30S ribosomal protein S4 OS=Geobacillus sp. (strain WCH70) GN=rpsD PE=3 SV=1_C5D699	3D-structure;Antibiotic resistance;Complete proteome;Direct protein sequencing;RNA-binding;Reference proteome;Ribonucleoprotein;Ribosomal protein;rRNA-binding;	;;;	;	;;K02986;;	;K02986;	UniRef50_P81288	UniRef90_P81288	UniRef100_C5D699	Bacteria	Bacillaceae	unknown	Bacilli	Bacillales	Bacillaceae	Bacillaceae	Bacillaceae	Bacillaceae	8	1	2	1	0	1	0	1	1	1	0	0	0	0	0	0	0	0	0	0	0	0	0	0	0	0	0	0	0	0	0
Meta-Protein 824	Metagenome unknown		;;		;;					Uncategorized	Uncategorized	unknown	Uncategorized	Uncategorized	Uncategorized	Uncategorized	Uncategorized	Uncategorized	5	0	1	0	0	1	2	0	0	1	0	0	0	0	0	0	0	0	0	0	0	0	0	0	0	0	0	0	0	0	0
Meta-Protein 5031	XOXF_PARDE Putative dehydrogenase XoxF OS=Paracoccus denitrificans GN=xoxF PE=3 SV=2	Calcium;Metal-binding;Oxidoreductase;PQQ;Signal;	;1.1.99.-;;	1.1.99.-;	;;;	;	UniRef50_P29968	UniRef90_P29968	UniRef100_P29968	Bacteria	Paracoccus denitrificans	unknown	Alphaproteobacteria	Rhodobacterales	Rhodobacteraceae	Paracoccus	Paracoccus denitrificans	Paracoccus denitrificans	6	0	0	0	0	0	0	0	0	0	0	0	0	0	0	0	0	0	0	0	0	0	0	0	0	0	0	0	0	0	0
Meta-Protein 3088	Metagenome unknown		;;		;;					Uncategorized	Uncategorized	unknown	Uncategorized	Uncategorized	Uncategorized	Uncategorized	Uncategorized	Uncategorized	9	1	1	1	2	2	0	2	0	0	0	0	0	0	0	0	0	0	0	0	0	0	0	0	0	0	0	0	0	0	0
Meta-Protein 1853	Metagenome Unknown		;;		;;					Uncategorized	Uncategorized	unknown	Uncategorized	Uncategorized	Uncategorized	Uncategorized	Uncategorized	Uncategorized	2	0	0	0	0	0	0	0	0	0	0	0	0	0	0	0	0	0	0	0	2	0	0	0	0	0	0	0	0	0	0
Meta-Protein 2786	ISPE_THEP1 4-diphosphocytidyl-2-C-methyl-D-erythritol kinase OS=Thermotoga petrophila (strain RKU-1 / ATCC BAA-488 / DSM 13995) GN=ispE PE=3 SV=1	ATP-binding;Complete proteome;Isoprene biosynthesis;Kinase;Nucleotide-binding;Transferase;	;2.7.1.148;;	2.7.1.148;	;K00919;;	K00919;	UniRef50_Q9X1A3	UniRef90_Q9X1A3	UniRef100_A5IMJ0	Bacteria	Thermotoga petrophila RKU-1	unknown	Thermotogae	Thermotogales	Thermotogaceae	Thermotoga	Thermotoga petrophila	Thermotoga petrophila RKU-1	1	1	0	0	0	0	0	0	0	0	0	0	0	0	0	0	0	0	0	0	0	0	0	0	0	0	0	0	0	0	0
Meta-Protein 387	Metagenome unknown	3D-structure;Cell membrane;Complete proteome;Glycoprotein;Lipoprotein;Membrane;Signal;Sugar transport;Transport;	;;;	;	;K02027;;	K02027;	UniRef50_Q7LYW7	UniRef90_Q7LYW7	UniRef100_Q7LYW7	Archaea	Thermococcus litoralis DSM 5473	unknown	Thermococci	Thermococcales	Thermococcaceae	Thermococcus	Thermococcus litoralis	Thermococcus litoralis DSM 5473	170	14	15	13	25	23	12	17	15	10	7	2	4	2	2	2	2	3	2	0	0	0	0	0	0	0	0	0	0	0	0
Meta-Protein 5151	BLAST_OMP32_DELAC Outer membrane porin protein 32 OS=Delftia acidovorans GN=omp32 PE=1 SV=1_P24305	3D-structure;Cell outer membrane;Direct protein sequencing;Ion transport;Membrane;Porin;Pyrrolidone carboxylic acid;Signal;Transmembrane;Transmembrane beta strand;Transport;	;;;	;	;;;	;	UniRef50_P24305	UniRef90_P24305	UniRef100_P24305	Bacteria	Delftia acidovorans	unknown	Betaproteobacteria	Burkholderiales	Comamonadaceae	Delftia	Delftia acidovorans	Delftia acidovorans	1	0	0	0	0	0	0	0	0	0	0	0	0	0	0	0	0	0	0	0	0	0	0	0	0	0	0	0	0	0	0
Meta-Protein 5052	G3P_SORMA Glyceraldehyde-3-phosphate dehydrogenase OS=Sordaria macrospora GN=GPD PE=3 SV=2	Cytoplasm;Glycolysis;NAD;Oxidoreductase;	;1.2.1.12;;	1.2.1.12;	;;;	;	UniRef50_P00355	UniRef90_P54118	UniRef100_Q8WZN0	Eukaryota	Fungi	unknown	Sordariomycetes	Sordariales	Sordariaceae	Sordaria	Sordaria macrospora	Sordaria macrospora	5	0	0	0	0	0	0	0	0	0	0	0	0	0	0	0	0	0	0	0	0	0	0	0	0	0	0	0	0	0	0
Meta-Protein 1469	DNAK_LACP7 Chaperone protein DnaK OS=Lachnoclostridium phytofermentans (strain ATCC 700394 / DSM 18823 / ISDg) GN=dnaK PE=3 SV=1	ATP-binding;Chaperone;Complete proteome;Nucleotide-binding;Phosphoprotein;Reference proteome;Stress response;	;;;	;	;K04043;;	K04043;	UniRef50_P30721	UniRef90_A9KKU0	UniRef100_A9KKU0	Bacteria	Firmicutes	unknown	Firmicutes	Firmicutes	Firmicutes	Firmicutes	Firmicutes	Firmicutes	26	0	0	0	0	0	0	0	0	0	0	0	0	0	0	0	0	0	0	2	0	0	0	0	1	2	4	5	1	0	0
Meta-Protein 3216	Metagenome unknown		;;		;;					Uncategorized	Uncategorized	unknown	Uncategorized	Uncategorized	Uncategorized	Uncategorized	Uncategorized	Uncategorized	1	1	0	0	0	0	0	0	0	0	0	0	0	0	0	0	0	0	0	0	0	0	0	0	0	0	0	0	0	0	0
Meta-Protein 103	BLAST_GSIB_PECAS Glutathione-binding protein GsiB OS=Pectobacterium atrosepticum (strain SCRI 1043 / ATCC BAA-672) GN=gsiB PE=3 SV=1_Q6D3B0	Complete proteome;Periplasm;Reference proteome;Signal;Transport;	;;;	;	;;K02035;K13889;;	;K02035;K13889;	EMPTY	EMPTY	EMPTY	Bacteria	Proteobacteria	unknown	Proteobacteria	Proteobacteria	Proteobacteria	Proteobacteria	Proteobacteria	Proteobacteria	729	65	58	49	91	60	69	58	59	44	37	21	24	17	15	10	19	15	18	0	0	0	0	0	0	0	0	0	0	0	0
Meta-Protein 3300	BLAST_GRPE_METBF Protein GrpE OS=Methanosarcina barkeri (strain Fusaro / DSM 804) GN=grpE PE=3 SV=1_Q465Y5	Chaperone;Complete proteome;Cytoplasm;Reference proteome;Stress response;	;;;	;	;K03687;;	K03687;	UniRef50_P0CW11	UniRef90_Q465Y5	UniRef100_Q465Y5	Archaea	Methanosarcina barkeri str. Fusaro	unknown	Methanomicrobia	Methanosarcinales	Methanosarcinaceae	Methanosarcina	Methanosarcina barkeri	Methanosarcina barkeri str. Fusaro	2	1	1	0	0	0	0	0	0	0	0	0	0	0	0	0	0	0	0	0	0	0	0	0	0	0	0	0	0	0	0
Meta-Protein 1493	BLAST_RL33_BACV8 50S ribosomal protein L33 OS=Bacteroides vulgatus (strain ATCC 8482 / DSM 1447 / JCM 5826 / NBRC 14291 / NCTC 11154) GN=rpmG PE=3 SV=1_A6L5E5	Complete proteome;Reference proteome;Ribonucleoprotein;Ribosomal protein;	;;;	;	;K02913;;	K02913;	UniRef50_P06392	UniRef90_Q8A9A0	UniRef100_A6L5E5	Bacteria	Bacteroidales	unknown	Bacteroidia	Bacteroidales	Bacteroidales	Bacteroidales	Bacteroidales	Bacteroidales	6	0	0	0	0	0	0	0	0	0	0	0	0	0	0	0	0	0	0	2	1	0	0	0	2	0	0	1	0	0	0
Meta-Protein 351	BLAST_PRXU_PEPAC Selenocysteine-containing peroxiredoxin PrxU OS=Peptoclostridium acidaminophilum GN=prxU PE=1 SV=2_Q9L3Q5	Antioxidant;Direct protein sequencing;Oxidoreductase;Peroxidase;Redox-active center;Selenocysteine;	;1.11.1.15;;	1.11.1.15;	;;;	;	UniRef50_Q9L3Q5	UniRef90_Q9L3Q5	UniRef100_Q9L3Q5	Bacteria	Eubacterium acidaminophilum	unknown	Clostridia	Clostridiales	Eubacteriaceae	Eubacterium	Eubacterium acidaminophilum	Eubacterium acidaminophilum	132	29	27	26	7	8	5	6	3	2	12	3	4	0	0	0	0	0	0	0	0	0	0	0	0	0	0	0	0	0	0
Meta-Protein 4970	Metagenome Unknown		;;		;;					Uncategorized	Uncategorized	unknown	Uncategorized	Uncategorized	Uncategorized	Uncategorized	Uncategorized	Uncategorized	1	0	0	0	0	0	0	0	0	0	0	0	0	0	0	0	0	0	0	0	0	0	0	0	0	0	0	0	0	0	1
Meta-Protein 1415	BLAST_TYPA_BACSU GTP-binding protein TypA/BipA homolog OS=Bacillus subtilis (strain 168) GN=typA PE=3 SV=1_O07631	3D-structure;Complete proteome;Cytoplasm;Direct protein sequencing;Elongation factor;GTP-binding;Nucleotide-binding;Phosphoprotein;Protein biosynthesis;Reference proteome;	;;;	;	;K02355;K06207;;	K02355;K06207;	UniRef50_O07631	UniRef90_O07631	UniRef100_O07631	Bacteria	Bacteria	unknown	Bacteria	Bacteria	Bacteria	Bacteria	Bacteria	Bacteria	3	0	0	0	0	0	0	0	0	0	0	0	0	0	0	0	0	0	0	1	0	0	1	0	1	0	0	0	0	0	0
Meta-Protein 1243	THID_ECOLI Hydroxymethylpyrimidine/phosphomethylpyrimidine kinase OS=Escherichia coli (strain K12) GN=thiD PE=1 SV=1	3D-structure;ATP-binding;Complete proteome;Direct protein sequencing;Kinase;Nucleotide-binding;Reference proteome;Thiamine biosynthesis;Transferase;	;2.7.1.49;2.7.4.7;;	2.7.1.49;2.7.4.7;	;K00941;;	K00941;	UniRef50_P76422	UniRef90_P76422	EMPTY	Bacteria	Enterobacteriaceae	unknown	Gammaproteobacteria	Enterobacteriales	Enterobacteriaceae	Enterobacteriaceae	Enterobacteriaceae	Enterobacteriaceae	4	0	0	0	0	0	0	0	0	0	4	0	0	0	0	0	0	0	0	0	0	0	0	0	0	0	0	0	0	0	0
Meta-Protein 4864	BLAST_RS5_PARD8 30S ribosomal protein S5 OS=Parabacteroides distasonis (strain ATCC 8503 / DSM 20701 / CIP 104284 / JCM 5825 / NCTC 11152) GN=rpsE PE=3 SV=1_A6LEH4	Complete proteome;RNA-binding;Reference proteome;Ribonucleoprotein;Ribosomal protein;rRNA-binding;	;;;	;	;K02988;;	K02988;	UniRef50_Q18CH3	UniRef90_A6LEH4	UniRef100_A6LEH4	Bacteria	Parabacteroides distasonis ATCC 8503	unknown	Bacteroidia	Bacteroidales	Porphyromonadaceae	Parabacteroides	Parabacteroides distasonis	Parabacteroides distasonis ATCC 8503	3	0	0	0	0	0	0	0	0	0	0	0	0	0	0	0	0	0	0	0	0	0	0	0	0	2	0	1	0	0	0
Meta-Protein 1631	Metagenome Unknown		;;		;;					Uncategorized	Uncategorized	unknown	Uncategorized	Uncategorized	Uncategorized	Uncategorized	Uncategorized	Uncategorized	1	0	0	0	0	0	0	0	0	0	0	0	0	0	0	0	0	0	0	1	0	0	0	0	0	0	0	0	0	0	0
Meta-Protein 3438	Metagenome unknown		;;		;;					Uncategorized	Uncategorized	unknown	Uncategorized	Uncategorized	Uncategorized	Uncategorized	Uncategorized	Uncategorized	1	0	1	0	0	0	0	0	0	0	0	0	0	0	0	0	0	0	0	0	0	0	0	0	0	0	0	0	0	0	0
Meta-Protein 3766	Metagenome unknown		;;		;;					Uncategorized	Uncategorized	unknown	Uncategorized	Uncategorized	Uncategorized	Uncategorized	Uncategorized	Uncategorized	1	0	0	0	1	0	0	0	0	0	0	0	0	0	0	0	0	0	0	0	0	0	0	0	0	0	0	0	0	0	0
Meta-Protein 588	BLAST_RPRY_BACFR Transcriptional regulatory protein RprY OS=Bacteroides fragilis (strain YCH46) GN=rprY PE=3 SV=2_Q9AE24	Complete proteome;Cytoplasm;DNA-binding;Phosphoprotein;Transcription;Transcription regulation;Two-component regulatory system;	;;;	;	;;;	;	UniRef50_Q9AE24	UniRef90_Q9AE24	UniRef100_Q9AE24	Bacteria	Bacteroides fragilis YCH46	unknown	Bacteroidia	Bacteroidales	Bacteroidaceae	Bacteroides	Bacteroides fragilis	Bacteroides fragilis YCH46	39	6	7	5	6	3	2	2	2	0	3	2	1	0	0	0	0	0	0	0	0	0	0	0	0	0	0	0	0	0	0
Meta-Protein 1520	Metagenome Unknown		;;		;;					Uncategorized	Uncategorized	unknown	Uncategorized	Uncategorized	Uncategorized	Uncategorized	Uncategorized	Uncategorized	6	0	0	0	0	0	0	0	0	0	0	0	0	0	0	0	0	0	0	1	2	0	0	0	2	0	0	0	1	0	0
Meta-Protein 5185	BLAST_MOCB_RHIML Putative rhizopine-binding protein OS=Rhizobium meliloti GN=mocB PE=3 SV=1_P49308	Periplasm;Signal;Transport;	;;;	;	;;;	;	UniRef50_P49308	UniRef90_P49308	UniRef100_P49308	Bacteria	Sinorhizobium meliloti	unknown	Alphaproteobacteria	Rhizobiales	Rhizobiaceae	Sinorhizobium	Sinorhizobium meliloti	Sinorhizobium meliloti	1	0	0	0	0	0	0	0	0	0	0	0	0	0	0	0	0	0	0	0	0	0	0	0	0	0	0	0	0	0	0
Meta-Protein 1455	AFRP_STRGR A-factor receptor protein OS=Streptomyces griseus GN=arpA PE=1 SV=1	Cytoplasm;Direct protein sequencing;DNA-binding;Repressor;Sporulation;Transcription;Transcription regulation;	;;;	;	;;;	;	UniRef50_Q9ZN78	UniRef90_Q9ZN78	UniRef100_Q9ZN78	Bacteria	Streptomyces griseus	unknown	Actinobacteria	Actinomycetales	Streptomycetaceae	Streptomyces	Streptomyces griseus	Streptomyces griseus	3	0	0	0	0	0	0	0	0	0	0	0	0	0	0	0	0	0	0	2	1	0	0	0	0	0	0	0	0	0	0
Meta-Protein 4338	BLAST_NPLB_XENLA N-acetylneuraminate lyase B OS=Xenopus laevis GN=npl-b PE=2 SV=1_Q5XGL8	Carbohydrate metabolism;Cytoplasm;Lyase;Schiff base;	;4.1.3.3;;	4.1.3.3;	;K01639;;	K01639;	UniRef50_Q5XGL8	UniRef90_Q5XGL8	UniRef100_Q5XGL8	Eukaryota	Metazoa	unknown	Amphibia	Anura	Pipidae	Xenopus	Xenopus laevis	Xenopus laevis	2	0	0	0	0	0	0	0	0	0	0	0	0	0	0	0	0	0	0	1	1	0	0	0	0	0	0	0	0	0	0
Meta-Protein 2576	BLAST_PUR5_LACP7 Phosphoribosylformylglycinamidine cyclo-ligase OS=Lachnoclostridium phytofermentans (strain ATCC 700394 / DSM 18823 / ISDg) GN=purM PE=3 SV=1_A9KHX3	ATP-binding;Complete proteome;Cytoplasm;Ligase;Nucleotide-binding;Purine biosynthesis;Reference proteome;	;6.3.3.1;;	6.3.3.1;	;K01933;;	K01933;	UniRef50_Q5L3D0	UniRef90_C4ZH75	UniRef100_C4ZH75	Bacteria	Clostridiales	unknown	Clostridia	Clostridiales	Clostridiales	Clostridiales	Clostridiales	Clostridiales	1	0	0	0	0	0	0	0	0	0	0	0	0	0	0	0	0	0	0	0	0	0	0	0	0	0	0	0	0	0	0
Meta-Protein 5077	BLAST_FMM_MORNO Fimbrial protein OS=Moraxella nonliquefaciens GN=tfpA PE=1 SV=2_P09829	Direct protein sequencing;Fimbrium;Methylation;	;;;	;	;;;	;	UniRef50_P09829	UniRef90_P09829	UniRef100_P09829	Bacteria	Moraxella nonliquefaciens	unknown	Gammaproteobacteria	Pseudomonadales	Moraxellaceae	Moraxella	Moraxella nonliquefaciens	Moraxella nonliquefaciens	2	0	0	0	0	0	0	0	0	0	0	0	0	0	0	0	0	0	0	0	0	0	0	0	0	0	0	0	0	0	0
Meta-Protein 4278	SSFA2_HUMAN Sperm-specific antigen 2 OS=Homo sapiens GN=SSFA2 PE=1 SV=3	Actin-binding;Alternative splicing;Coiled coil;Complete proteome;Cytoplasm;Isopeptide bond;Phosphoprotein;Polymorphism;Reference proteome;Ubl conjugation;	;;;	;	;;;	;	UniRef50_P28290	UniRef90_P28290	UniRef100_P28290	Eukaryota	Metazoa	unknown	Mammalia	Primates	Hominidae	Homo	Homo sapiens	Homo sapiens	1	0	0	0	0	0	0	0	0	0	0	0	1	0	0	0	0	0	0	0	0	0	0	0	0	0	0	0	0	0	0
Meta-Protein 3182	FTSZ_WIGBR Cell division protein FtsZ OS=Wigglesworthia glossinidia brevipalpis GN=ftsZ PE=3 SV=1	Cell cycle;Cell division;Complete proteome;Cytoplasm;GTP-binding;Nucleotide-binding;Reference proteome;Septation;	;;;	;	;K03531;;	K03531;	UniRef50_Q9ALA3	UniRef90_Q9ALA3	UniRef100_Q9ALA3	Bacteria	Wigglesworthia glossinidia endosymbiont of Glossina brevipalpis	unknown	Gammaproteobacteria	Enterobacteriales	Enterobacteriaceae	Wigglesworthia	Wigglesworthia glossinidia	Wigglesworthia glossinidia endosymbiont of Glossina brevipalpis	1	1	0	0	0	0	0	0	0	0	0	0	0	0	0	0	0	0	0	0	0	0	0	0	0	0	0	0	0	0	0
Meta-Protein 1879	BLAST_PORF_PSEFL Outer membrane porin F OS=Pseudomonas fluorescens GN=oprF PE=1 SV=1_P37726	3D-structure;Apoptosis;Cell outer membrane;Complete proteome;Direct protein sequencing;Disulfide bond;Ion transport;Membrane;Porin;Pyrrolidone carboxylic acid;Reference proteome;Repeat;Signal;Transmembrane;Transmembrane beta strand;Transport;	;;;	;	;;K03286;;	;K03286;	EMPTY	EMPTY	UniRef100_P37726	Bacteria	Bacteria	unknown	Bacteria	Bacteria	Bacteria	Bacteria	Bacteria	Bacteria	78	0	0	0	0	0	0	0	0	0	0	0	0	0	0	0	0	0	0	0	0	9	18	15	0	0	0	0	0	0	0
Meta-Protein 2302	Metagenome Unknown		;;		;;					Uncategorized	Uncategorized	unknown	Uncategorized	Uncategorized	Uncategorized	Uncategorized	Uncategorized	Uncategorized	19	0	0	0	0	0	0	0	0	0	0	0	0	0	0	0	0	0	0	0	0	0	0	0	0	6	5	7	0	0	0
Meta-Protein 2063	Metagenome Unknown		;;		;;					Uncategorized	Uncategorized	unknown	Uncategorized	Uncategorized	Uncategorized	Uncategorized	Uncategorized	Uncategorized	1	0	0	0	0	0	0	0	0	0	0	0	0	0	0	0	0	0	0	0	0	0	1	0	0	0	0	0	0	0	0
Meta-Protein 4889	BLAST_PCCB_HALMT Propionyl-CoA carboxylase, carboxyltransferase subunit OS=Haloferax mediterranei (strain ATCC 33500 / DSM 1411 / JCM 8866 / NBRC 14739 / NCIMB 2177 / R-4) GN=pccB PE=1 SV=1_I3R7F1	Complete proteome;Ligase;Lyase;Reference proteome;	;6.4.1.3;;	6.4.1.3;	;K19312;;	K19312;	UniRef50_P07633	UniRef90_I3R7F1	UniRef100_I3R7F1	Archaea	Haloferax mediterranei ATCC 33500	unknown	Halobacteria	Halobacteriales	Halobacteriaceae	Haloferax	Haloferax mediterranei	Haloferax mediterranei ATCC 33500	2	0	0	0	0	0	0	0	0	0	0	0	0	0	0	0	0	0	0	0	0	0	0	0	0	0	1	1	0	0	0
Meta-Protein 257	Metagenome unknown		;;		;;					Uncategorized	Uncategorized	unknown	Uncategorized	Uncategorized	Uncategorized	Uncategorized	Uncategorized	Uncategorized	305	20	24	21	48	39	25	26	20	16	11	8	8	8	6	1	9	9	6	0	0	0	0	0	0	0	0	0	0	0	0
Meta-Protein 3058	BLAST_SSB_BACTN Single-stranded DNA-binding protein OS=Bacteroides thetaiotaomicron (strain ATCC 29148 / DSM 2079 / NCTC 10582 / E50 / VPI-5482) GN=ssb PE=3 SV=1_Q8A7M7	Complete proteome;DNA-binding;Reference proteome;	;;;	;	;K03111;;	K03111;	UniRef50_Q8A7M7	UniRef90_Q8A7M7	UniRef100_Q8A7M7	Bacteria	Bacteroides thetaiotaomicron VPI-5482	unknown	Bacteroidia	Bacteroidales	Bacteroidaceae	Bacteroides	Bacteroides thetaiotaomicron	Bacteroides thetaiotaomicron VPI-5482	6	2	0	2	1	0	1	0	0	0	0	0	0	0	0	0	0	0	0	0	0	0	0	0	0	0	0	0	0	0	0
Meta-Protein 3249	SLAP2_THET8 S-layer protein OS=Thermus thermophilus (strain HB8 / ATCC 27634 / DSM 579) GN=slpA PE=3 SV=1	Cell wall;S-layer;Secreted;Signal;	;;;	;	;;;	;	UniRef50_P35830	UniRef90_P35830	UniRef100_P35830	Bacteria	Thermus thermophilus HB8	unknown	Deinococci	Thermales	Thermaceae	Thermus	Thermus thermophilus	Thermus thermophilus HB8	2	1	0	0	1	0	0	0	0	0	0	0	0	0	0	0	0	0	0	0	0	0	0	0	0	0	0	0	0	0	0
Meta-Protein 2759	BLAST_MTAC_METBF Methanol--corrinoid protein OS=Methanosarcina barkeri (strain Fusaro / DSM 804) GN=mtaC PE=1 SV=1_Q46EH4	3D-structure;Cobalt;Complete proteome;Direct protein sequencing;Metal-binding;Reference proteome;	;;;	;	;K14081;;	K14081;	UniRef50_Q46EH4	UniRef90_Q46EH4	UniRef100_Q46EH4	Archaea	Methanosarcina barkeri str. Fusaro	unknown	Methanomicrobia	Methanosarcinales	Methanosarcinaceae	Methanosarcina	Methanosarcina barkeri	Methanosarcina barkeri str. Fusaro	161	21	19	20	17	12	8	5	3	1	19	9	11	5	3	4	0	2	2	0	0	0	0	0	0	0	0	0	0	0	0
Meta-Protein 705	BLAST_POTA_DESHY Spermidine/putrescine import ATP-binding protein PotA OS=Desulfitobacterium hafniense (strain Y51) GN=potA PE=3 SV=2_Q24XJ2	ATP-binding;Cell membrane;Complete proteome;Hydrolase;Membrane;Nucleotide-binding;Reference proteome;Transport;	;3.6.3.31;;	3.6.3.31;	;K11072;;	K11072;	EMPTY	EMPTY	EMPTY	Bacteria	Clostridiales	unknown	Clostridia	Clostridiales	Clostridiales	Clostridiales	Clostridiales	Clostridiales	6	3	1	1	0	0	0	1	0	0	0	0	0	0	0	0	0	0	0	0	0	0	0	0	0	0	0	0	0	0	0
Meta-Protein 1615	BLAST_MSMX_BACSU Maltodextrin import ATP-binding protein MsmX OS=Bacillus subtilis (strain 168) GN=msmX PE=3 SV=1_P94360	ATP-binding;Cell inner membrane;Cell membrane;Complete proteome;Hydrolase;Membrane;Nucleotide-binding;Polysaccharide transport;Reference proteome;Sugar transport;Transport;	;;3.6.3.-;3.6.3.20;;	;3.6.3.-;3.6.3.20;	;K05816;K10112;;	K05816;K10112;	UniRef50_Q1QTX6	UniRef90_Q00752	UniRef100_Q00752	cellular organisms	cellular organisms	unknown	cellular organisms	cellular organisms	cellular organisms	cellular organisms	cellular organisms	cellular organisms	254	21	18	17	13	11	16	14	13	12	15	11	14	2	5	2	6	5	6	5	6	2	7	6	6	5	5	4	1	0	0
Meta-Protein 31	BLAST_ILVC_CLOTH Ketol-acid reductoisomerase (NADP(+)) OS=Clostridium thermocellum (strain ATCC 27405 / DSM 1237 / NBRC 103400 / NCIMB 10682 / NRRL B-4536 / VPI 7372) GN=ilvC PE=3 SV=1_A3DIE1	Amino-acid biosynthesis;Branched-chain amino acid biosynthesis;Complete proteome;Magnesium;Metal-binding;NADP;Nucleotide-binding;Oxidoreductase;Reference proteome;	;1.1.1.86;;	1.1.1.86;	;K00053;;	K00053;	UniRef50_C1DFH7	UniRef90_A3DIE1	UniRef100_A3DIE1	Bacteria	Clostridium thermocellum ATCC 27405	unknown	Clostridia	Clostridiales	Clostridiaceae	Clostridium	Clostridium thermocellum	Clostridium thermocellum ATCC 27405	12	2	4	2	0	1	0	1	1	1	0	0	0	0	0	0	0	0	0	0	0	0	0	0	0	0	0	0	0	0	0
Meta-Protein 53	BLAST_CAS7_HALVD CRISPR-associated protein Cas7 OS=Haloferax volcanii (strain ATCC 29605 / DSM 3757 / JCM 8879 / NBRC 14742 / NCIMB 2012 / VKM B-1768 / DS2) GN=cas7 PE=1 SV=1_D4GQN6	Antiviral defense;Complete proteome;Cytoplasm;Plasmid;Reference proteome;	;;;	;	;K19115;;	K19115;	UniRef50_D4GQN6	UniRef90_D4GQN6	UniRef100_D4GQN6	Archaea	Haloferax volcanii DS2	unknown	Halobacteria	Halobacteriales	Halobacteriaceae	Haloferax	Haloferax volcanii	Haloferax volcanii DS2	5	1	0	0	1	1	0	1	1	0	0	0	0	0	0	0	0	0	0	0	0	0	0	0	0	0	0	0	0	0	0
Meta-Protein 1168	BLAST_CYSK_BACSU Cysteine synthase OS=Bacillus subtilis (strain 168) GN=cysK PE=1 SV=3_P37887	Amino-acid biosynthesis;Complete proteome;Cysteine biosynthesis;Cytoplasm;Direct protein sequencing;Phosphoprotein;Pyridoxal phosphate;Reference proteome;Transferase;	;2.5.1.47;;	2.5.1.47;	;;K01738;;	;K01738;	UniRef50_P37887	UniRef90_P37887	UniRef100_P37887	cellular organisms	cellular organisms	unknown	cellular organisms	cellular organisms	cellular organisms	cellular organisms	cellular organisms	cellular organisms	1	0	0	0	0	0	0	0	1	0	0	0	0	0	0	0	0	0	0	0	0	0	0	0	0	0	0	0	0	0	0
Meta-Protein 2421	BLAST_ADEC_ENTFA Adenine deaminase OS=Enterococcus faecalis (strain ATCC 700802 / V583) GN=ade PE=3 SV=1_Q835Z6	Carbohydrate metabolism;Complete proteome;Hydrolase;Manganese;Metal-binding;Pyrimidine biosynthesis;Reference proteome;Zinc;	;3.5.1.-;3.5.2.3;3.5.4.2;;	3.5.1.-;3.5.2.3;3.5.4.2;	;K01465;K01486;K02079;;	K01465;K01486;K02079;	UniRef50_Q835Z6	UniRef90_Q835Z6	UniRef100_Q835Z6	Bacteria	Bacteria	unknown	Bacteria	Bacteria	Bacteria	Bacteria	Bacteria	Bacteria	3	0	0	0	0	0	0	0	0	0	0	0	0	0	0	0	0	0	0	0	0	0	0	0	0	2	0	1	0	0	0
Meta-Protein 4423	BLAST_ATPA_FUSNN ATP synthase subunit alpha OS=Fusobacterium nucleatum subsp. nucleatum (strain ATCC 25586 / CIP 101130 / JCM 8532 / LMG 13131) GN=atpA PE=3 SV=1_Q8RGE0	ATP synthesis;ATP-binding;CF(1);Cell inner membrane;Cell membrane;Complete proteome;Hydrogen ion transport;Hydrolase;Ion transport;Membrane;Nucleotide-binding;Reference proteome;Transport;	;3.6.3.14;;	3.6.3.14;	;K02111;;	K02111;	UniRef50_Q8DLP3	EMPTY	EMPTY	Bacteria	Bacteria	unknown	Bacteria	Bacteria	Bacteria	Bacteria	Bacteria	Bacteria	8	0	0	0	0	0	0	0	0	0	0	0	0	0	0	0	0	0	0	2	0	1	1	0	0	0	1	0	0	0	1
Meta-Protein 4501	BLAST_MANA1_BACSU Mannose-6-phosphate isomerase ManA OS=Bacillus subtilis (strain 168) GN=manA PE=2 SV=1_O31646	Complete proteome;Isomerase;Metal-binding;Reference proteome;Zinc;	;5.3.1.8;;	5.3.1.8;	;K01809;;	K01809;	UniRef50_O31646	UniRef90_O31646	UniRef100_O31646	Bacteria	Bacillus subtilis subsp. subtilis str. 168	unknown	Bacilli	Bacillales	Bacillaceae	Bacillus	Bacillus subtilis subsp. subtilis str. 168	Bacillus subtilis subsp. subtilis	1	0	0	0	0	0	0	0	0	0	0	0	0	0	0	0	0	0	0	0	1	0	0	0	0	0	0	0	0	0	0
Meta-Protein 3655	Metagenome unknown		;;		;;					Uncategorized	Uncategorized	unknown	Uncategorized	Uncategorized	Uncategorized	Uncategorized	Uncategorized	Uncategorized	11	0	0	0	1	2	2	3	1	2	0	0	0	0	0	0	0	0	0	0	0	0	0	0	0	0	0	0	0	0	0
Meta-Protein 1589	BLAST_RL20_BACFN 50S ribosomal protein L20 OS=Bacteroides fragilis (strain ATCC 25285 / DSM 2151 / JCM 11019 / NCTC 9343) GN=rplT PE=3 SV=1_Q5LEQ3	Complete proteome;RNA-binding;Reference proteome;Ribonucleoprotein;Ribosomal protein;rRNA-binding;	;;;	;	;K02887;;	K02887;	UniRef50_P13070	UniRef90_Q8AAN9	UniRef100_A6L9S5	Bacteria	Bacteroidales	unknown	Bacteroidia	Bacteroidales	Bacteroidales	Bacteroidales	Bacteroidales	Bacteroidales	20	0	0	0	0	0	0	0	0	0	0	0	0	0	0	0	0	0	0	2	3	1	3	3	3	0	0	0	1	0	2
Meta-Protein 173	BLAST_RS19_CARHZ 30S ribosomal protein S19 OS=Carboxydothermus hydrogenoformans (strain ATCC BAA-161 / DSM 6008 / Z-2901) GN=rpsS PE=3 SV=1_Q3A9S0	Complete proteome;RNA-binding;Reference proteome;Ribonucleoprotein;Ribosomal protein;rRNA-binding;	;;;	;	;K02965;;	K02965;	EMPTY	EMPTY	EMPTY	cellular organisms	cellular organisms	unknown	cellular organisms	cellular organisms	cellular organisms	cellular organisms	cellular organisms	cellular organisms	13	1	1	1	1	1	0	1	1	1	1	1	1	0	0	0	0	0	0	0	0	0	0	1	0	1	0	0	0	0	0
Meta-Protein 2276	BLAST_RS4_LACP7 30S ribosomal protein S4 OS=Lachnoclostridium phytofermentans (strain ATCC 700394 / DSM 18823 / ISDg) GN=rpsD PE=3 SV=1_A9KJG7	Complete proteome;RNA-binding;Reference proteome;Ribonucleoprotein;Ribosomal protein;rRNA-binding;	;;;	;	;K02986;;	K02986;	UniRef50_Q9X1I3	UniRef90_C4Z2V6	UniRef100_C4Z2V6	Bacteria	Clostridia	unknown	Clostridia	Clostridia	Clostridia	Clostridia	Clostridia	Clostridia	16	0	0	0	0	0	0	0	0	0	0	0	0	0	0	0	0	0	0	0	0	0	0	0	0	6	3	1	0	0	0
Meta-Protein 3221	BLAST_SUSC_BACTN TonB-dependent receptor SusC OS=Bacteroides thetaiotaomicron (strain ATCC 29148 / DSM 2079 / NCTC 10582 / E50 / VPI-5482) GN=susC PE=1 SV=1_Q8A1G1	Carbohydrate metabolism;Cell outer membrane;Complete proteome;Membrane;Receptor;Reference proteome;Signal;TonB box;Transmembrane;Transmembrane beta strand;Transport;	;;;	;	;K21573;;	K21573;	UniRef50_Q8A1G1	UniRef90_Q8A1G1	UniRef100_Q8A1G1	Bacteria	Bacteroides thetaiotaomicron VPI-5482	unknown	Bacteroidia	Bacteroidales	Bacteroidaceae	Bacteroides	Bacteroides thetaiotaomicron	Bacteroides thetaiotaomicron VPI-5482	1	1	0	0	0	0	0	0	0	0	0	0	0	0	0	0	0	0	0	0	0	0	0	0	0	0	0	0	0	0	0
Meta-Protein 1179	BLAST_Y106_METJA Uncharacterized protein MJ0106 OS=Methanocaldococcus jannaschii (strain ATCC 43067 / DSM 2661 / JAL-1 / JCM 10045 / NBRC 100440) GN=MJ0106 PE=4 SV=1_Q57570	Cell membrane;Complete proteome;Membrane;Reference proteome;Transmembrane;Transmembrane helix;	;;;	;	;K06869;;	K06869;	UniRef50_Q57570	UniRef90_Q57570	UniRef100_Q57570	Archaea	Methanocaldococcus jannaschii DSM 2661	unknown	Methanococci	Methanococcales	Methanocaldococcaceae	Methanocaldococcus	Methanocaldococcus jannaschii	Methanocaldococcus jannaschii DSM 2661	5	0	0	0	0	0	0	0	0	0	1	1	2	1	0	0	0	0	0	0	0	0	0	0	0	0	0	0	0	0	0
Meta-Protein 901	BLAST_FDHC_METFO Probable formate transporter OS=Methanobacterium formicicum GN=fdhC PE=3 SV=1_P35839	Cell membrane;Membrane;Transmembrane;Transmembrane helix;Transport;	;;;	;	;;;	;	EMPTY	EMPTY	EMPTY	Archaea	Methanobacteriaceae	unknown	Methanobacteria	Methanobacteriales	Methanobacteriaceae	Methanobacteriaceae	Methanobacteriaceae	Methanobacteriaceae	9	0	0	1	1	0	0	2	2	2	1	0	0	0	0	0	0	0	0	0	0	0	0	0	0	0	0	0	0	0	0
Meta-Protein 1104	BLAST_ACCC_ECO57 Biotin carboxylase OS=Escherichia coli O157:H7 GN=accC PE=3 SV=1_Q8X9B6	3D-structure;ATP-binding;Biotin;Complete proteome;Direct protein sequencing;Fatty acid biosynthesis;Fatty acid metabolism;Ligase;Lipid biosynthesis;Lipid metabolism;Nucleotide-binding;Reference proteome;	;6.3.4.14;6.4.1.2;;	6.3.4.14;6.4.1.2;	;K01961;;	K01961;	UniRef50_P24182	UniRef90_P24182	EMPTY	Bacteria	Escherichia coli	unknown	Gammaproteobacteria	Enterobacteriales	Enterobacteriaceae	Escherichia	Escherichia coli	Escherichia coli	1	0	0	0	0	0	1	0	0	0	0	0	0	0	0	0	0	0	0	0	0	0	0	0	0	0	0	0	0	0	0
Meta-Protein 2499	BLAST_YHCH_ECOLI Uncharacterized protein YhcH OS=Escherichia coli (strain K12) GN=yhcH PE=2 SV=1_P45424	3D-structure;Complete proteome;Reference proteome;	;;;	;	;;;	;	EMPTY	EMPTY	EMPTY	Bacteria	Gammaproteobacteria	unknown	Gammaproteobacteria	Gammaproteobacteria	Gammaproteobacteria	Gammaproteobacteria	Gammaproteobacteria	Gammaproteobacteria	3	0	0	0	0	0	0	0	0	0	0	0	0	0	0	0	0	0	0	0	0	0	0	0	0	0	1	0	0	0	0
Meta-Protein 5057	IF4A_PHANO ATP-dependent RNA helicase eIF4A OS=Phaeosphaeria nodorum (strain SN15 / ATCC MYA-4574 / FGSC 10173) GN=TIF1 PE=3 SV=1	ATP-binding;Complete proteome;Cytoplasm;Helicase;Hydrolase;Initiation factor;Nucleotide-binding;Protein biosynthesis;Reference proteome;RNA-binding;	;3.6.4.13;;	3.6.4.13;	;K03257;;	K03257;	UniRef50_Q14240	UniRef90_Q5B948	UniRef100_Q0UU86	Eukaryota	Fungi	unknown	Dothideomycetes	Pleosporales	Phaeosphaeriaceae	Phaeosphaeria	Phaeosphaeria nodorum	Phaeosphaeria nodorum SN15	1	0	0	0	0	0	0	0	0	0	0	0	0	0	0	0	0	0	0	0	0	0	0	0	0	0	0	0	0	0	0
Meta-Protein 2754	BLAST_GLFT_STRP1 Glutamate formimidoyltransferase OS=Streptococcus pyogenes serotype M1 GN=M5005_Spy1772 PE=1 SV=1_Q99XR4	Complete proteome;Cytoplasm;Folate-binding;Histidine metabolism;Ligase;Reference proteome;Transferase;	;2.1.2.5;6.3.3.2;;	2.1.2.5;6.3.3.2;	;K00603;;	K00603;	UniRef50_Q99XR4	UniRef90_Q99XR4	UniRef100_Q99XR4	Bacteria	Streptococcus pyogenes serotype M1	unknown	Bacilli	Lactobacillales	Streptococcaceae	Streptococcus	Streptococcus pyogenes	Streptococcus pyogenes serotype M1	1	1	0	0	0	0	0	0	0	0	0	0	0	0	0	0	0	0	0	0	0	0	0	0	0	0	0	0	0	0	0
Meta-Protein 3906	BLAST_MOCB_RHIML Putative rhizopine-binding protein OS=Rhizobium meliloti GN=mocB PE=3 SV=1_P49308	Periplasm;Signal;Transport;	;;;	;	;;;	;	UniRef50_P49308	UniRef90_P49308	UniRef100_P49308	Bacteria	Sinorhizobium meliloti	unknown	Alphaproteobacteria	Rhizobiales	Rhizobiaceae	Sinorhizobium	Sinorhizobium meliloti	Sinorhizobium meliloti	1	0	0	0	0	0	1	0	0	0	0	0	0	0	0	0	0	0	0	0	0	0	0	0	0	0	0	0	0	0	0
Meta-Protein 1347	BLAST_LIPO_BACSU Lipoprotein LipO OS=Bacillus subtilis (strain 168) GN=lipO PE=1 SV=1_P37966	Cell membrane;Complete proteome;Lipoprotein;Membrane;Palmitate;Reference proteome;Signal;	;;;	;	;K17318;;	K17318;	UniRef50_P37966	UniRef90_P37966	UniRef100_P37966	Bacteria	Bacillus subtilis subsp. subtilis str. 168	unknown	Bacilli	Bacillales	Bacillaceae	Bacillus	Bacillus subtilis subsp. subtilis str. 168	Bacillus subtilis subsp. subtilis	88	0	0	0	0	0	0	0	0	0	0	0	0	0	0	0	0	0	0	6	0	1	2	3	2	23	14	14	1	0	1
Meta-Protein 241	BLAST_PGK_GEOSW Phosphoglycerate kinase OS=Geobacillus sp. (strain WCH70) GN=pgk PE=3 SV=1_C5D7M4	3D-structure;ATP-binding;Complete proteome;Cytoplasm;Glycolysis;Kinase;Nucleotide-binding;Phosphoprotein;Reference proteome;Transferase;	;2.7.2.3;;	2.7.2.3;	;;K00927;;	;K00927;	UniRef50_Q9SAJ4	EMPTY	EMPTY	Bacteria	Bacteria	unknown	Bacteria	Bacteria	Bacteria	Bacteria	Bacteria	Bacteria	71	15	9	10	5	2	3	6	2	3	5	6	3	1	0	0	0	1	0	0	0	0	0	0	0	0	0	0	0	0	0
Meta-Protein 1209	Metagenome unknown		;;		;;					Uncategorized	Uncategorized	unknown	Uncategorized	Uncategorized	Uncategorized	Uncategorized	Uncategorized	Uncategorized	1	0	0	0	0	0	0	0	0	0	1	0	0	0	0	0	0	0	0	0	0	0	0	0	0	0	0	0	0	0	0
Meta-Protein 393	BLAST_NQOR_DEIRA NAD(P)H dehydrogenase (quinone) OS=Deinococcus radiodurans (strain ATCC 13939 / DSM 20539 / JCM 16871 / LMG 4051 / NBRC 15346 / NCIMB 9279 / R1 / VKM B-1422) GN=DR_A0214 PE=1 SV=1_Q9RYU4	3D-structure;Complete proteome;FMN;Flavoprotein;NAD;NADP;Nucleotide-binding;Oxidoreductase;Reference proteome;	;1.6.5.2;;	1.6.5.2;	;K03809;;	K03809;	UniRef50_Q9RYU4	UniRef90_Q9RYU4	UniRef100_Q9RYU4	Bacteria	Deinococcus radiodurans R1	unknown	Deinococci	Deinococcales	Deinococcaceae	Deinococcus	Deinococcus radiodurans	Deinococcus radiodurans R1	86	15	14	14	9	3	4	4	3	3	6	3	5	0	0	0	0	1	2	0	0	0	0	0	0	0	0	0	0	0	0
Meta-Protein 1940	BLAST_SUSC_BACTN TonB-dependent receptor SusC OS=Bacteroides thetaiotaomicron (strain ATCC 29148 / DSM 2079 / NCTC 10582 / E50 / VPI-5482) GN=susC PE=1 SV=1_Q8A1G1	Carbohydrate metabolism;Cell outer membrane;Complete proteome;Membrane;Receptor;Reference proteome;Signal;TonB box;Transmembrane;Transmembrane beta strand;Transport;	;;;	;	;K21573;;	K21573;	UniRef50_Q8A1G1	UniRef90_Q8A1G1	UniRef100_Q8A1G1	Bacteria	Bacteroides thetaiotaomicron VPI-5482	unknown	Bacteroidia	Bacteroidales	Bacteroidaceae	Bacteroides	Bacteroides thetaiotaomicron	Bacteroides thetaiotaomicron VPI-5482	12	0	0	0	0	0	0	0	0	0	0	0	0	0	0	0	0	0	0	0	0	3	6	3	0	0	0	0	0	0	0
Meta-Protein 324	BLAST_NDLMS_EUBBA Nicotinate dehydrogenase large molybdopterin subunit OS=Eubacterium barkeri GN=ndhL PE=1 SV=1_Q0QLF2	3D-structure;Direct protein sequencing;Metal-binding;Molybdenum;NADP;Oxidoreductase;Selenium;	;1.17.1.5;;	1.17.1.5;	;K20447;;	K20447;	UniRef50_Q0QLF2	UniRef90_Q0QLF2	UniRef100_Q0QLF2	Bacteria	Eubacterium barkeri	unknown	Clostridia	Clostridiales	Eubacteriaceae	Eubacterium	Eubacterium barkeri	Eubacterium barkeri	83	7	5	4	19	15	15	8	6	3	1	0	0	0	0	0	0	0	0	0	0	0	0	0	0	0	0	0	0	0	0
Meta-Protein 4072	BLAST_Y248_CHLMU Uncharacterized protein TC_0248 OS=Chlamydia muridarum (strain MoPn / Nigg) GN=TC_0248 PE=3 SV=1_Q9PL60	Complete proteome;	;;;	;	;;;	;	UniRef50_O84866	UniRef90_Q9PL60	UniRef100_Q9PL60	Bacteria	Chlamydia muridarum Nigg	unknown	Chlamydiia	Chlamydiales	Chlamydiaceae	Chlamydia	Chlamydia muridarum	Chlamydia muridarum Nigg	1	0	0	0	0	0	0	0	1	0	0	0	0	0	0	0	0	0	0	0	0	0	0	0	0	0	0	0	0	0	0
Meta-Protein 2452	BLAST_CSPS_STRTR Cold shock protein CspSt (Fragment) OS=Streptococcus thermophilus PE=1 SV=1_P81622	Activator;Cytoplasm;DNA-binding;Direct protein sequencing;Stress response;Transcription;Transcription regulation;	;;;	;	;;;	;	UniRef50_P81622	UniRef90_P81622	UniRef100_P81622	Bacteria	Streptococcus thermophilus	unknown	Bacilli	Lactobacillales	Streptococcaceae	Streptococcus	Streptococcus thermophilus	Streptococcus thermophilus	6	0	0	0	0	0	0	0	0	0	0	0	0	0	0	0	0	0	0	0	0	0	0	0	0	1	0	0	2	1	2
Meta-Protein 621	BLAST_MTBC3_METMA Dimethylamine corrinoid protein 3 OS=Methanosarcina mazei (strain ATCC BAA-159 / DSM 3647 / Goe1 / Go1 / JCM 11833 / OCM 88) GN=mtbC3 PE=3 SV=1_P58981	Cobalt;Complete proteome;Metal-binding;Methanogenesis;Reference proteome;Repeat;	;;;	;	;K16179;;	K16179;	UniRef50_O93657	UniRef90_Q8TTB0	UniRef100_P58981	Archaea	Methanosarcina mazei Go1	unknown	Methanomicrobia	Methanosarcinales	Methanosarcinaceae	Methanosarcina	Methanosarcina mazei	Methanosarcina mazei Go1	12	2	2	2	2	1	0	2	0	1	0	0	0	0	0	0	0	0	0	0	0	0	0	0	0	0	0	0	0	0	0
Meta-Protein 1552	BLAST_SPI8_SOLTU Serine protease inhibitor 8 (Fragment) OS=Solanum tuberosum PE=1 SV=1_P24743	Complete proteome;Direct protein sequencing;Disulfide bond;Protease inhibitor;Reference proteome;Serine protease inhibitor;Vacuole;	;;;	;	;;;	;	UniRef50_P24743	UniRef90_P24743	UniRef100_P24743	Eukaryota	Viridiplantae	unknown	Solanum tuberosum	Solanales	Solanaceae	Solanum	Solanum tuberosum	Solanum tuberosum	4	0	0	0	0	0	0	0	0	0	0	0	0	0	0	0	0	0	0	4	0	0	0	0	0	0	0	0	0	0	0
Meta-Protein 1664	BLAST_KPRS_PORGI Ribose-phosphate pyrophosphokinase OS=Porphyromonas gingivalis (strain ATCC BAA-308 / W83) GN=prs PE=3 SV=1_Q7MT83	ATP-binding;Complete proteome;Cytoplasm;Kinase;Magnesium;Metal-binding;Nucleotide biosynthesis;Nucleotide-binding;Reference proteome;Transferase;	;2.7.6.1;;	2.7.6.1;	;K00948;;	K00948;	UniRef50_Q7MT83	UniRef90_Q7MT83	UniRef100_Q7MT83	Bacteria	Porphyromonas gingivalis W83	unknown	Bacteroidia	Bacteroidales	Porphyromonadaceae	Porphyromonas	Porphyromonas gingivalis	Porphyromonas gingivalis W83	35	0	0	0	0	0	0	0	0	0	0	0	0	0	0	0	0	0	0	2	4	3	10	3	6	2	2	1	0	0	1
Meta-Protein 3195	BLAST_ZB14_MAIZE 14 kDa zinc-binding protein OS=Zea mays GN=ZBP14 PE=1 SV=1_P42856	Complete proteome;Reference proteome;	;;;	;	;K02503;;	K02503;	UniRef50_P42856	UniRef90_P42856	UniRef100_P42856	Eukaryota	Viridiplantae	unknown	Liliopsida	Poales	Poaceae	Zea	Zea mays	Zea mays	1	1	0	0	0	0	0	0	0	0	0	0	0	0	0	0	0	0	0	0	0	0	0	0	0	0	0	0	0	0	0
Meta-Protein 601	BLAST_PNP_HELMI Polyribonucleotide nucleotidyltransferase OS=Heliobacterium modesticaldum (strain ATCC 51547 / Ice1) GN=pnp PE=3 SV=1_B0THS2	Complete proteome;Cytoplasm;Magnesium;Metal-binding;Nucleotidyltransferase;RNA-binding;Reference proteome;Transferase;	;2.7.7.8;;	2.7.7.8;	;K00962;;	K00962;	UniRef50_Q2IQ01	UniRef90_B0THS2	UniRef100_B0THS2	Bacteria	Bacteria	unknown	Bacteria	Bacteria	Bacteria	Bacteria	Bacteria	Bacteria	46	8	8	7	3	5	5	4	2	2	2	0	0	0	0	0	0	0	0	0	0	0	0	0	0	0	0	0	0	0	0
Meta-Protein 1636	BLAST_ACY1_HUMAN Aminoacylase-1 OS=Homo sapiens GN=ACY1 PE=1 SV=1_Q03154	3D-structure;Acetylation;Alternative splicing;Complete proteome;Cytoplasm;Direct protein sequencing;Disease mutation;Glycoprotein;Hydrolase;Membrane;Metal-binding;Phosphoprotein;Polymorphism;Reference proteome;Signal-anchor;Transmembrane;Transmembrane helix;Zinc;	;3.-.-.-;3.5.1.14;;	3.-.-.-;3.5.1.14;	;;K13706;K14677;;	;K13706;K14677;	UniRef50_Q03154	UniRef90_Q03154	EMPTY	Eukaryota	Metazoa	unknown	Mammalia	Eutheria	Eutheria	Eutheria	Eutheria	Eutheria	15	0	0	0	0	0	0	0	0	0	0	0	0	0	0	0	0	0	0	3	2	0	0	1	6	0	1	1	0	1	0
Meta-Protein 4240	BLAST_RL3_BACFR 50S ribosomal protein L3 OS=Bacteroides fragilis (strain YCH46) GN=rplC PE=3 SV=1_Q64NK8	Complete proteome;RNA-binding;Reference proteome;Ribonucleoprotein;Ribosomal protein;rRNA-binding;	;;;	;	;K02906;;	K02906;	UniRef50_Q9RXK2	UniRef90_Q8A476	UniRef100_Q5L8A9	Bacteria	Bacteroides fragilis	unknown	Bacteroidia	Bacteroidales	Bacteroidaceae	Bacteroides	Bacteroides fragilis	Bacteroides fragilis	1	0	0	0	0	0	0	0	0	0	1	0	0	0	0	0	0	0	0	0	0	0	0	0	0	0	0	0	0	0	0
Meta-Protein 3754	BLAST_SODF_METTM Superoxide dismutase [Fe] OS=Methanothermobacter marburgensis (strain ATCC BAA-927 / DSM 2133 / JCM 14651 / NBRC 100331 / OCM 82 / Marburg) GN=sod PE=3 SV=1_Q60036	Complete proteome;Iron;Metal-binding;Oxidoreductase;	;1.15.1.1;;	1.15.1.1;	;K04564;;	K04564;	UniRef50_P18868	UniRef90_Q60036	UniRef100_Q60036	Archaea	Methanothermobacter marburgensis str. Marburg	unknown	Methanobacteria	Methanobacteriales	Methanobacteriaceae	Methanothermobacter	Methanothermobacter marburgensis	Methanothermobacter marburgensis str. Marburg	1	0	0	0	1	0	0	0	0	0	0	0	0	0	0	0	0	0	0	0	0	0	0	0	0	0	0	0	0	0	0
Meta-Protein 237	BLAST_RS5_BACHD 30S ribosomal protein S5 OS=Bacillus halodurans (strain ATCC BAA-125 / DSM 18197 / FERM 7344 / JCM 9153 / C-125) GN=rpsE PE=3 SV=1_Q9Z9J7	Complete proteome;RNA-binding;Reference proteome;Ribonucleoprotein;Ribosomal protein;rRNA-binding;	;;;	;	;K02988;;	K02988;	UniRef50_P02357	UniRef90_Q5WLP5	UniRef100_Q5WLP5	Bacteria	Bacteria	unknown	Bacteria	Bacteria	Bacteria	Bacteria	Bacteria	Bacteria	29	5	3	4	0	0	0	1	2	2	5	3	3	0	0	0	0	1	0	0	0	0	0	0	0	0	0	0	0	0	0
Meta-Protein 4320	BLAST_RUBY_PORGI Rubrerythrin OS=Porphyromonas gingivalis (strain ATCC BAA-308 / W83) GN=rbr PE=2 SV=1_Q9AGG3	Complete proteome;Cytoplasm;Electron transport;Iron;Metal-binding;Reference proteome;Transport;	;;;	;	;;;	;	UniRef50_Q9AGG3	UniRef90_Q9AGG3	UniRef100_Q9AGG3	Bacteria	Porphyromonas gingivalis W83	unknown	Bacteroidia	Bacteroidales	Porphyromonadaceae	Porphyromonas	Porphyromonas gingivalis	Porphyromonas gingivalis W83	6	0	0	0	0	0	0	0	0	0	0	0	0	0	0	0	0	0	0	2	2	0	0	0	2	0	0	0	0	0	0
Meta-Protein 1673	BLAST_RRBR2_CLOAB Reverse rubrerythrin-2 OS=Clostridium acetobutylicum (strain ATCC 824 / DSM 792 / JCM 1419 / LMG 5710 / VKM B-1787) GN=rbr3B PE=1 SV=1_Q97D83	Complete proteome;Detoxification;Direct protein sequencing;Electron transport;Iron;Metal-binding;NAD;Oxidoreductase;Peroxidase;Reference proteome;Stress response;Transport;	;;1.11.1.1;;	;1.11.1.1;	;;K19824;;	;K19824;	EMPTY	EMPTY	UniRef100_Q58156	cellular organisms	cellular organisms	unknown	cellular organisms	cellular organisms	cellular organisms	cellular organisms	cellular organisms	cellular organisms	22	0	0	0	0	0	0	0	0	0	0	0	0	0	0	0	0	0	0	1	0	4	0	4	3	3	0	1	2	0	0
Meta-Protein 3349	BLAST_PBPB_MYCTU Penicillin-binding protein PbpB OS=Mycobacterium tuberculosis (strain ATCC 25618 / H37Rv) GN=pbpB PE=1 SV=1_L0T911	Cell membrane;Cell shape;Cell wall biogenesis/degradation;Complete proteome;Membrane;Peptidoglycan synthesis;Reference proteome;Transmembrane;Transmembrane helix;	;;;	;	;K03587;;	K03587;	UniRef50_L0T911	UniRef90_L0T911	UniRef100_L0T911	Bacteria	Mycobacterium tuberculosis H37Rv	unknown	Actinobacteria	Actinomycetales	Mycobacteriaceae	Mycobacterium	Mycobacterium tuberculosis	Mycobacterium tuberculosis H37Rv	1	0	1	0	0	0	0	0	0	0	0	0	0	0	0	0	0	0	0	0	0	0	0	0	0	0	0	0	0	0	0
Meta-Protein 2107	BLAST_XY10C_CELJA Endo-beta-1,4-xylanase Xyn10C OS=Cellvibrio japonicus GN=xyn10C PE=1 SV=2_Q59675	3D-structure;Carbohydrate metabolism;Cell outer membrane;Cellulose degradation;Direct protein sequencing;Disulfide bond;Glycosidase;Hydrolase;Lipoprotein;Membrane;Palmitate;Polysaccharide degradation;Repeat;Secreted;Signal;Xylan degradation;	;3.2.1.8;3.2.1.91;;	3.2.1.8;3.2.1.91;	;;;	;	UniRef50_Q59675	UniRef90_Q59675	UniRef100_Q59675	Bacteria	Bacteria	unknown	Bacteria	Bacteria	Bacteria	Bacteria	Bacteria	Bacteria	1	0	0	0	0	0	0	0	0	0	0	0	0	0	0	0	0	0	0	0	0	0	1	0	0	0	0	0	0	0	0
Meta-Protein 4567	BLAST_BGLX_DICCH Periplasmic beta-glucosidase/beta-xylosidase OS=Dickeya chrysanthemi GN=bgxA PE=3 SV=1_Q46684	Carbohydrate metabolism;Glycosidase;Hydrolase;Multifunctional enzyme;Periplasm;Polysaccharide degradation;Signal;Xylan degradation;	;3.2.1.21;3.2.1.37;;	3.2.1.21;3.2.1.37;	;;;	;	UniRef50_Q46684	UniRef90_Q46684	UniRef100_Q46684	Bacteria	Erwinia chrysanthemi	unknown	Gammaproteobacteria	Enterobacteriales	Enterobacteriaceae	Dickeya	Erwinia chrysanthemi	Erwinia chrysanthemi	6	0	0	0	0	0	0	0	0	0	0	0	0	0	0	0	0	0	0	0	0	2	3	0	0	0	0	0	0	0	0
Meta-Protein 2059	LEG3_CANLF Galectin-3 OS=Canis lupus familiaris GN=LGALS3 PE=1 SV=3	3D-structure;Acetylation;Complete proteome;Cytoplasm;Differentiation;Direct protein sequencing;Disulfide bond;IgE-binding protein;Immunity;Innate immunity;Lectin;Nucleus;Phosphoprotein;Polymorphism;Reference proteome;Repeat;Secreted;Spliceosome;mRNA processing;mRNA splicing;	;;;	;	;;K06831;;	;K06831;	UniRef50_P17931	EMPTY	EMPTY	Eukaryota	Metazoa	unknown	Mammalia	Eutheria	Eutheria	Eutheria	Eutheria	Eutheria	1	0	0	0	0	0	0	0	0	0	0	0	0	0	0	0	0	0	0	0	0	0	1	0	0	0	0	0	0	0	0
Meta-Protein 2291	BLAST_RS9_BACFR 30S ribosomal protein S9 OS=Bacteroides fragilis (strain YCH46) GN=rpsI PE=3 SV=1_Q64P28	Complete proteome;Reference proteome;Ribonucleoprotein;Ribosomal protein;	;;;	;	;K02996;;	K02996;	UniRef50_Q8A0Z5	UniRef90_Q8A0Z5	UniRef100_Q5L8W6	Bacteria	Bacteroides	unknown	Bacteroidia	Bacteroidales	Bacteroidaceae	Bacteroides	Bacteroides	Bacteroides	4	0	0	0	0	0	0	0	0	0	0	0	0	0	0	0	0	0	0	0	0	0	0	0	0	1	0	2	0	0	0
Meta-Protein 2651	BLAST_THIL_CUPNH Acetyl-CoA acetyltransferase OS=Cupriavidus necator (strain ATCC 17699 / H16 / DSM 428 / Stanier 337) GN=phaA PE=1 SV=1_P14611	3D-structure;Acyltransferase;Complete proteome;Cytoplasm;FMN;Flavoprotein;NADP;Oxidoreductase;PHB biosynthesis;RNA-binding;Reference proteome;Transferase;tRNA processing;tRNA-binding;	;1.1.1.36;1.3.1.-;1.3.1.91;2.3.1.9;;	1.1.1.36;1.3.1.-;1.3.1.91;2.3.1.9;	;;K00023;K00626;K05539;;	;K00023;K00626;K05539;	UniRef50_P14697	UniRef90_P14697	UniRef100_P14697	Bacteria	Proteobacteria	unknown	Proteobacteria	Proteobacteria	Proteobacteria	Proteobacteria	Proteobacteria	Proteobacteria	5	0	0	0	0	0	0	0	0	0	0	0	0	0	0	0	0	0	0	0	0	0	0	0	0	0	0	0	0	0	0
Meta-Protein 5112	Metagenome unknown		;;		;;					Uncategorized	Uncategorized	unknown	Uncategorized	Uncategorized	Uncategorized	Uncategorized	Uncategorized	Uncategorized	2	0	0	0	0	0	0	0	0	0	0	0	0	0	0	0	0	0	0	0	0	0	0	0	0	0	0	0	0	0	0
Meta-Protein 3761	Metagenome unknown		;;		;;					Uncategorized	Uncategorized	unknown	Uncategorized	Uncategorized	Uncategorized	Uncategorized	Uncategorized	Uncategorized	1	0	0	0	1	0	0	0	0	0	0	0	0	0	0	0	0	0	0	0	0	0	0	0	0	0	0	0	0	0	0
Meta-Protein 3226	BLAST_CSLA_PEDHD Chondroitinase-AC OS=Pedobacter heparinus (strain ATCC 13125 / DSM 2366 / CIP 104194 / JCM 7457 / NBRC 12017 / NCIMB 9290 / NRRL B-14731 / HIM 762-3) GN=cslA PE=1 SV=1_Q59288	3D-structure;Calcium;Complete proteome;Glycoprotein;Lyase;Metal-binding;Reference proteome;Signal;	;4.2.2.5;;	4.2.2.5;	;K19049;;	K19049;	UniRef50_Q59288	UniRef90_Q59288	UniRef100_Q59288	Bacteria	Pedobacter heparinus DSM 2366	unknown	Sphingobacteriia	Sphingobacteriales	Sphingobacteriaceae	Pedobacter	Pedobacter heparinus	Pedobacter heparinus DSM 2366	1	1	0	0	0	0	0	0	0	0	0	0	0	0	0	0	0	0	0	0	0	0	0	0	0	0	0	0	0	0	0
Meta-Protein 1377	BLAST_SUSC_BACTN TonB-dependent receptor SusC OS=Bacteroides thetaiotaomicron (strain ATCC 29148 / DSM 2079 / NCTC 10582 / E50 / VPI-5482) GN=susC PE=1 SV=1_Q8A1G1	Carbohydrate metabolism;Cell outer membrane;Complete proteome;Membrane;Receptor;Reference proteome;Signal;TonB box;Transmembrane;Transmembrane beta strand;Transport;	;;;	;	;K21573;;	K21573;	UniRef50_Q8A1G1	UniRef90_Q8A1G1	UniRef100_Q8A1G1	Bacteria	Bacteroides thetaiotaomicron VPI-5482	unknown	Bacteroidia	Bacteroidales	Bacteroidaceae	Bacteroides	Bacteroides thetaiotaomicron	Bacteroides thetaiotaomicron VPI-5482	1	0	0	0	0	0	0	0	0	0	0	0	0	0	0	0	0	0	0	1	0	0	0	0	0	0	0	0	0	0	0
Meta-Protein 3070	BLAST_MALE_THELN Trehalose/maltose-binding protein MalE OS=Thermococcus litoralis (strain ATCC 51850 / DSM 5473 / JCM 8560 / NS-C) GN=malE PE=1 SV=2_Q7LYW7	3D-structure;Cell membrane;Complete proteome;Glycoprotein;Lipoprotein;Membrane;Signal;Sugar transport;Transport;	;;;	;	;K02027;;	K02027;	UniRef50_Q7LYW7	UniRef90_Q7LYW7	UniRef100_Q7LYW7	Archaea	Thermococcus litoralis DSM 5473	unknown	Thermococci	Thermococcales	Thermococcaceae	Thermococcus	Thermococcus litoralis	Thermococcus litoralis DSM 5473	4	2	2	0	0	0	0	0	0	0	0	0	0	0	0	0	0	0	0	0	0	0	0	0	0	0	0	0	0	0	0
Meta-Protein 4373	BLAST_SCPA_ECOLI Methylmalonyl-CoA mutase OS=Escherichia coli (strain K12) GN=scpA PE=1 SV=2_P27253	Cobalamin;Cobalt;Complete proteome;Isomerase;Metal-binding;Reference proteome;	;5.4.99.2;;	5.4.99.2;	;K01847;;	K01847;	UniRef50_P22033	UniRef90_P27253	UniRef100_P27253	Bacteria	Escherichia coli K-12	unknown	Gammaproteobacteria	Enterobacteriales	Enterobacteriaceae	Escherichia	Escherichia coli	Escherichia coli K-12	1	0	0	0	0	0	0	0	0	0	0	0	0	0	0	0	0	0	0	1	0	0	0	0	0	0	0	0	0	0	0
Meta-Protein 2169	BLAST_RL17_EUBE2 50S ribosomal protein L17 OS=Eubacterium eligens (strain ATCC 27750 / VPI C15-48) GN=rplQ PE=3 SV=1_C4Z2V8	Complete proteome;Reference proteome;Ribonucleoprotein;Ribosomal protein;	;;;	;	;K02879;;	K02879;	UniRef50_C4Z2V8	UniRef90_C4Z2V8	UniRef100_C4Z2V8	Bacteria	Bacteria	unknown	Bacteria	Bacteria	Bacteria	Bacteria	Bacteria	Bacteria	13	0	0	0	0	0	0	0	0	0	0	0	0	0	0	0	0	0	0	0	0	0	1	1	0	3	4	0	0	0	0
Meta-Protein 2332	BLAST_OMPB1_NEIGO Major outer membrane protein P.IB OS=Neisseria gonorrhoeae GN=porB PE=3 SV=1_P18195	Cell outer membrane;Complete proteome;Direct protein sequencing;Ion transport;Membrane;Porin;Reference proteome;Signal;Transmembrane;Transmembrane beta strand;Transport;	;;;	;	;;;	;	EMPTY	EMPTY	UniRef100_P30691	Bacteria	Betaproteobacteria	unknown	Betaproteobacteria	Betaproteobacteria	Betaproteobacteria	Betaproteobacteria	Betaproteobacteria	Betaproteobacteria	6	0	0	0	0	0	0	0	0	0	0	0	0	0	0	0	0	0	0	0	0	0	0	0	0	3	2	0	0	0	0
Meta-Protein 2485	BLAST_AROE_LISMF Shikimate dehydrogenase (NADP(+)) OS=Listeria monocytogenes serotype 4b (strain F2365) GN=aroE PE=3 SV=1_Q723F9	3D-structure;Amino-acid biosynthesis;Aromatic amino acid biosynthesis;Complete proteome;NADP;Oxidoreductase;Reference proteome;	;1.1.1.25;;	1.1.1.25;	;K00014;;	K00014;	UniRef50_Q92EG7	UniRef90_Q92EG7	EMPTY	Bacteria	Firmicutes	unknown	Firmicutes	Firmicutes	Firmicutes	Firmicutes	Firmicutes	Firmicutes	4	0	0	0	0	0	0	0	0	0	0	0	0	0	0	0	0	0	0	0	0	0	0	0	0	0	4	0	0	0	0
Meta-Protein 720	BLAST_FRHG_METBF Coenzyme F420 hydrogenase subunit gamma OS=Methanosarcina barkeri (strain Fusaro / DSM 804) GN=frhG PE=1 SV=3_P80491	4Fe-4S;Complete proteome;Direct protein sequencing;Electron transport;Iron;Iron-sulfur;Metal-binding;Oxidoreductase;Reference proteome;Repeat;Transport;	;1.12.98.1;;	1.12.98.1;	;K00443;;	K00443;	UniRef50_P80491	UniRef90_P80491	UniRef100_P80491	Archaea	Methanosarcina barkeri str. Fusaro	unknown	Methanomicrobia	Methanosarcinales	Methanosarcinaceae	Methanosarcina	Methanosarcina barkeri	Methanosarcina barkeri str. Fusaro	99	9	9	9	9	8	6	10	10	8	9	3	2	0	0	0	2	3	2	0	0	0	0	0	0	0	0	0	0	0	0
Meta-Protein 4071	BLAST_YUID_BACSU Uncharacterized membrane protein YuiD OS=Bacillus subtilis (strain 168) GN=yuiD PE=4 SV=1_O32107	Cell membrane;Complete proteome;Membrane;Reference proteome;Transmembrane;Transmembrane helix;	;;;	;	;K09775;;	K09775;	UniRef50_O32107	UniRef90_O32107	UniRef100_O32107	Bacteria	Bacillus subtilis subsp. subtilis str. 168	unknown	Bacilli	Bacillales	Bacillaceae	Bacillus	Bacillus subtilis subsp. subtilis str. 168	Bacillus subtilis subsp. subtilis	1	0	0	0	0	0	0	0	1	0	0	0	0	0	0	0	0	0	0	0	0	0	0	0	0	0	0	0	0	0	0
Meta-Protein 3751	HBB_BATEA Hemoglobin subunit beta OS=Bathyraja eatonii GN=HBB PE=1 SV=1	Direct protein sequencing;Heme;Iron;Metal-binding;Oxygen transport;Transport;	;;;	;	;;;	;	UniRef50_P56692	UniRef90_P84217	UniRef100_P84217	Eukaryota	Metazoa	unknown	Chondrichthyes	Rajiformes	Arhynchobatidae	Bathyraja	Bathyraja eatonii	Bathyraja eatonii	1	0	0	0	1	0	0	0	0	0	0	0	0	0	0	0	0	0	0	0	0	0	0	0	0	0	0	0	0	0	0
Meta-Protein 4921	Metagenome Unknown		;;		;;					Uncategorized	Uncategorized	unknown	Uncategorized	Uncategorized	Uncategorized	Uncategorized	Uncategorized	Uncategorized	1	0	0	0	0	0	0	0	0	0	0	0	0	0	0	0	0	0	0	0	0	0	0	0	0	0	1	0	0	0	0
Meta-Protein 4580	BLAST_RS13_DESDA 30S ribosomal protein S13 OS=Desulfovibrio desulfuricans (strain ATCC 27774 / DSM 6949) GN=rpsM PE=3 SV=1_B8IYL4	Complete proteome;RNA-binding;Reference proteome;Ribonucleoprotein;Ribosomal protein;rRNA-binding;tRNA-binding;	;;;	;	;K02952;;	K02952;	UniRef50_P20282	UniRef90_B8IYL4	UniRef100_B8IYL4	Bacteria	Desulfovibrio desulfuricans subsp. desulfuricans str. ATCC 27774	unknown	Deltaproteobacteria	Desulfovibrionales	Desulfovibrionaceae	Desulfovibrio	Desulfovibrio desulfuricans subsp. desulfuricans str. ATCC 27774	Desulfovibrio desulfuricans subsp. desulfuricans	3	0	0	0	0	0	0	0	0	0	0	0	0	0	0	0	0	0	0	0	0	1	0	0	0	0	0	0	1	0	0
Meta-Protein 102	Metagenome unknown	Complete proteome;Periplasm;Reference proteome;Signal;Transport;	;;;	;	;K02027;;	K02027;	UniRef50_Q578M8	UniRef90_Q578M8	UniRef100_Q578M8	Bacteria	Brucella	unknown	Alphaproteobacteria	Rhizobiales	Brucellaceae	Brucella	Brucella	Brucella	784	109	106	87	90	73	47	64	60	40	55	18	16	0	2	0	5	6	6	0	0	0	0	0	0	0	0	0	0	0	0
Meta-Protein 1208	RS11_CLOK5 30S ribosomal protein S11 OS=Clostridium kluyveri (strain ATCC 8527 / DSM 555 / NCIMB 10680) GN=rpsK PE=3 SV=1	Complete proteome;RNA-binding;Reference proteome;Ribonucleoprotein;Ribosomal protein;rRNA-binding;	;;;	;	;K02948;;	K02948;	UniRef50_Q6N4V6	UniRef90_A6LPT8	UniRef100_A7FZ46	Bacteria	Clostridium	unknown	Clostridia	Clostridiales	Clostridiaceae	Clostridium	Clostridium	Clostridium	4	0	0	0	0	0	0	0	0	0	1	1	2	0	0	0	0	0	0	0	0	0	0	0	0	0	0	0	0	0	0
Meta-Protein 51	BLAST_CMPC_SYNP6 Bicarbonate transport ATP-binding protein CmpC OS=Synechococcus sp. (strain ATCC 27144 / PCC 6301 / SAUG 1402/1) GN=cmpC PE=3 SV=1_Q5MZ54	ATP-binding;Cell inner membrane;Cell membrane;Complete proteome;Hydrolase;Ion transport;Membrane;Nucleotide-binding;Reference proteome;Transport;	;3.6.3.-;;	3.6.3.-;	;K11952;;	K11952;	UniRef50_Q55462	UniRef90_Q55107	UniRef100_Q55107	Bacteria	Synechococcus elongatus	unknown	Synechococcus elongatus	Chroococcales	Synechococcus elongatus	Synechococcus	Synechococcus elongatus	Synechococcus elongatus	20	4	3	3	1	0	0	2	3	2	0	0	0	0	0	0	1	1	0	0	0	0	0	0	0	0	0	0	0	0	0
Meta-Protein 319	Metagenome unknown		;;		;;					Uncategorized	Uncategorized	unknown	Uncategorized	Uncategorized	Uncategorized	Uncategorized	Uncategorized	Uncategorized	2	1	0	0	0	0	1	0	0	0	0	0	0	0	0	0	0	0	0	0	0	0	0	0	0	0	0	0	0	0	0
Meta-Protein 3043	Metagenome unknown		;;		;;					Uncategorized	Uncategorized	unknown	Uncategorized	Uncategorized	Uncategorized	Uncategorized	Uncategorized	Uncategorized	15	2	2	2	1	1	2	2	0	2	1	0	0	0	0	0	0	0	0	0	0	0	0	0	0	0	0	0	0	0	0
Meta-Protein 4007	BLAST_SERA_METJA D-3-phosphoglycerate dehydrogenase OS=Methanocaldococcus jannaschii (strain ATCC 43067 / DSM 2661 / JAL-1 / JCM 10045 / NBRC 100440) GN=serA PE=3 SV=1_Q58424	Amino-acid biosynthesis;Complete proteome;NAD;Oxidoreductase;Reference proteome;Serine biosynthesis;	;1.1.1.95;;	1.1.1.95;	;K00058;;	K00058;	UniRef50_Q58424	UniRef90_Q58424	UniRef100_Q58424	Archaea	Methanocaldococcus jannaschii DSM 2661	unknown	Methanococci	Methanococcales	Methanocaldococcaceae	Methanocaldococcus	Methanocaldococcus jannaschii	Methanocaldococcus jannaschii DSM 2661	2	0	0	0	0	0	0	2	0	0	0	0	0	0	0	0	0	0	0	0	0	0	0	0	0	0	0	0	0	0	0
Meta-Protein 4314	Metagenome Unknown		;;		;;					Uncategorized	Uncategorized	unknown	Uncategorized	Uncategorized	Uncategorized	Uncategorized	Uncategorized	Uncategorized	11	0	0	0	0	0	0	0	0	0	0	0	0	0	0	0	0	0	0	3	0	0	0	0	4	0	2	1	0	1	0
Meta-Protein 4210	Metagenome unknown		;;		;;					Uncategorized	Uncategorized	unknown	Uncategorized	Uncategorized	Uncategorized	Uncategorized	Uncategorized	Uncategorized	1	0	0	0	0	0	0	0	0	0	1	0	0	0	0	0	0	0	0	0	0	0	0	0	0	0	0	0	0	0	0
Meta-Protein 4926	Metagenome Unknown		;;		;;					Uncategorized	Uncategorized	unknown	Uncategorized	Uncategorized	Uncategorized	Uncategorized	Uncategorized	Uncategorized	1	0	0	0	0	0	0	0	0	0	0	0	0	0	0	0	0	0	0	0	0	0	0	0	0	0	0	1	0	0	0
Meta-Protein 1591	BLAST_RL3_BACTN 50S ribosomal protein L3 OS=Bacteroides thetaiotaomicron (strain ATCC 29148 / DSM 2079 / NCTC 10582 / E50 / VPI-5482) GN=rplC PE=3 SV=1_Q8A476	Complete proteome;RNA-binding;Reference proteome;Ribonucleoprotein;Ribosomal protein;rRNA-binding;	;;;	;	;K02906;;	K02906;	EMPTY	EMPTY	EMPTY	Bacteria	Bacteroidales	unknown	Bacteroidia	Bacteroidales	Bacteroidales	Bacteroidales	Bacteroidales	Bacteroidales	42	0	0	0	0	0	0	0	0	0	0	0	0	0	0	0	0	0	0	6	6	4	11	4	6	1	0	2	1	0	1
Meta-Protein 4498	RAD25_SCHPO DNA damage checkpoint protein rad25 OS=Schizosaccharomyces pombe (strain 972 / ATCC 24843) GN=rad25 PE=1 SV=1	Cell cycle;Complete proteome;DNA damage;Phosphoprotein;Reference proteome;	;;;	;	;K06630;;	K06630;	UniRef50_P61981	UniRef90_P42657	UniRef100_P42657	Eukaryota	Fungi	unknown	Schizosaccharomycetes	Schizosaccharomycetales	Schizosaccharomycetaceae	Schizosaccharomyces	Schizosaccharomyces pombe	Schizosaccharomyces pombe 972h-	2	0	0	0	0	0	0	0	0	0	0	0	0	0	0	0	0	0	0	0	1	0	0	0	0	0	0	0	0	0	0
Meta-Protein 580	Metagenome unknown		;;		;;					Uncategorized	Uncategorized	unknown	Uncategorized	Uncategorized	Uncategorized	Uncategorized	Uncategorized	Uncategorized	11	1	2	1	0	0	0	0	0	0	3	3	1	0	0	0	0	0	0	0	0	0	0	0	0	0	0	0	0	0	0
Meta-Protein 3303	BLAST_SCPA_ECOLI Methylmalonyl-CoA mutase OS=Escherichia coli (strain K12) GN=scpA PE=1 SV=2_P27253	Cobalamin;Cobalt;Complete proteome;Isomerase;Metal-binding;Reference proteome;	;5.4.99.2;;	5.4.99.2;	;K01847;;	K01847;	UniRef50_P22033	UniRef90_P27253	UniRef100_P27253	Bacteria	Escherichia coli K-12	unknown	Gammaproteobacteria	Enterobacteriales	Enterobacteriaceae	Escherichia	Escherichia coli	Escherichia coli K-12	2	1	0	0	1	0	0	0	0	0	0	0	0	0	0	0	0	0	0	0	0	0	0	0	0	0	0	0	0	0	0
Meta-Protein 3488	BLAST_CH60_ACHLI 60 kDa chaperonin OS=Acholeplasma laidlawii (strain PG-8A) GN=groL PE=3 SV=1_A9NHL6	ATP-binding;Chaperone;Complete proteome;Cytoplasm;Nucleotide-binding;Reference proteome;	;;;	;	;K04077;;	K04077;	UniRef50_P23033	UniRef90_A9NHL6	UniRef100_A9NHL6	Bacteria	Acholeplasma laidlawii PG-8A	unknown	Mollicutes	Acholeplasmatales	Acholeplasmataceae	Acholeplasma	Acholeplasma laidlawii	Acholeplasma laidlawii PG-8A	1	0	0	1	0	0	0	0	0	0	0	0	0	0	0	0	0	0	0	0	0	0	0	0	0	0	0	0	0	0	0
Meta-Protein 3053	BLAST_PEPF_MYCPU Oligoendopeptidase F homolog OS=Mycoplasma pulmonis (strain UAB CTIP) GN=pepF PE=3 SV=1_Q98QP0	Complete proteome;Hydrolase;Metal-binding;Metalloprotease;Protease;Reference proteome;Zinc;	;3.4.24.-;;	3.4.24.-;	;K08602;;	K08602;	UniRef50_Q98QP0	UniRef90_Q98QP0	UniRef100_Q98QP0	Bacteria	Mycoplasma pulmonis UAB CTIP	unknown	Mollicutes	Mycoplasmatales	Mycoplasmataceae	Mycoplasma	Mycoplasma pulmonis	Mycoplasma pulmonis UAB CTIP	5	2	2	1	0	0	0	0	0	0	0	0	0	0	0	0	0	0	0	0	0	0	0	0	0	0	0	0	0	0	0
Meta-Protein 447	BLAST_FTHS_SYNFM Formate--tetrahydrofolate ligase OS=Syntrophobacter fumaroxidans (strain DSM 10017 / MPOB) GN=fhs PE=3 SV=1_A0LLR3	3D-structure;ATP-binding;Acetylation;Amino-acid biosynthesis;Complete proteome;Cytoplasm;Direct protein sequencing;Disease mutation;Histidine biosynthesis;Hydrolase;Ligase;Methionine biosynthesis;Multifunctional enzyme;NADP;Nucleotide-binding;One-carbon metabolism;Oxidoreductase;Phosphoprotein;Polymorphism;Purine biosynthesis;Reference proteome;	;1.5.1.5;3.5.4.9;6.3.4.3;;	1.5.1.5;3.5.4.9;6.3.4.3;	;K00288;K01938;;	K00288;K01938;	UniRef50_B5YJE1	UniRef90_Q6AL19	UniRef100_Q6AL19	cellular organisms	cellular organisms	unknown	cellular organisms	cellular organisms	cellular organisms	cellular organisms	cellular organisms	cellular organisms	18	3	3	2	1	1	1	1	0	0	3	1	2	0	0	0	0	0	0	0	0	0	0	0	0	0	0	0	0	0	0
Meta-Protein 1566	BLAST_SUDHA_PYRFU Sulfide dehydrogenase subunit alpha OS=Pyrococcus furiosus (strain ATCC 43587 / DSM 3638 / JCM 8422 / Vc1) GN=sudA PE=1 SV=1_Q8U195	3D-structure;3Fe-4S;4Fe-4S;Amino-acid biosynthesis;Complete proteome;Cytoplasm;Direct protein sequencing;FAD;Flavoprotein;Glutamate biosynthesis;Iron;Iron-sulfur;Metal-binding;NADP;Oxidoreductase;Reference proteome;	;1.18.1.2;1.4.1.13;1.8.1.19;;	1.18.1.2;1.4.1.13;1.8.1.19;	;K00266;K20202;;	K00266;K20202;	UniRef50_Q8U195	UniRef90_Q8U195	UniRef100_Q8U195	cellular organisms	cellular organisms	unknown	cellular organisms	cellular organisms	cellular organisms	cellular organisms	cellular organisms	cellular organisms	7	0	0	0	0	0	0	0	0	0	0	0	0	0	0	0	0	0	0	2	0	1	0	1	0	0	2	0	1	0	0
Meta-Protein 4810	DNAK_CHRVO Chaperone protein DnaK OS=Chromobacterium violaceum (strain ATCC 12472 / DSM 30191 / JCM 1249 / NBRC 12614 / NCIMB 9131 / NCTC 9757) GN=dnaK PE=3 SV=1	ATP-binding;Chaperone;Complete proteome;Nucleotide-binding;Phosphoprotein;Reference proteome;Stress response;	;;;	;	;K04043;;	K04043;	UniRef50_Q8GUM2	UniRef90_Q7NXI3	UniRef100_Q7NXI3	Bacteria	Chromobacterium violaceum ATCC 12472	unknown	Betaproteobacteria	Neisseriales	Neisseriaceae	Chromobacterium	Chromobacterium violaceum	Chromobacterium violaceum ATCC 12472	1	0	0	0	0	0	0	0	0	0	0	0	0	0	0	0	0	0	0	0	0	0	0	0	0	1	0	0	0	0	0
Meta-Protein 2600	BLAST_LIVB1_BRUA2 Leu/Ile/Val-binding protein homolog 1 OS=Brucella abortus (strain 2308) GN=BAB1_1794 PE=3 SV=1_Q2YLF8	Amino-acid transport;Cell inner membrane;Cell membrane;Complete proteome;Membrane;Reference proteome;Signal;Transmembrane;Transmembrane helix;Transport;	;;;	;	;K01997;K01998;K01999;;	K01997;K01998;K01999;	UniRef50_P22729	UniRef90_P21628	UniRef100_P21628	Bacteria	Proteobacteria	unknown	Proteobacteria	Proteobacteria	Proteobacteria	Proteobacteria	Proteobacteria	Proteobacteria	12	0	0	0	0	0	0	0	0	0	0	0	0	0	0	0	0	0	0	0	0	0	0	0	0	0	0	0	0	0	0
Meta-Protein 434	Metagenome unknown		;;		;;					Uncategorized	Uncategorized	unknown	Uncategorized	Uncategorized	Uncategorized	Uncategorized	Uncategorized	Uncategorized	10	2	2	1	0	0	0	0	0	0	3	2	0	0	0	0	0	0	0	0	0	0	0	0	0	0	0	0	0	0	0
Meta-Protein 1500	BLAST_EFG_THET2 Elongation factor G OS=Thermus thermophilus (strain HB27 / ATCC BAA-163 / DSM 7039) GN=fusA PE=1 SV=1_Q72I01	3D-structure;Complete proteome;Cytoplasm;Elongation factor;GTP-binding;Mitochondrion;Nucleotide-binding;Protein biosynthesis;Reference proteome;Transit peptide;	;;;	;	;;K02355;;	;K02355;	EMPTY	EMPTY	UniRef100_Q9RXK5	cellular organisms	cellular organisms	unknown	cellular organisms	cellular organisms	cellular organisms	cellular organisms	cellular organisms	cellular organisms	68	0	0	0	0	0	0	0	0	0	0	0	0	0	0	0	0	0	0	8	10	4	16	6	9	3	0	3	4	0	3
Meta-Protein 2740	BLAST_DAPAT_SYNFM LL-diaminopimelate aminotransferase OS=Syntrophobacter fumaroxidans (strain DSM 10017 / MPOB) GN=dapL PE=1 SV=1_A0LEA5	Aminotransferase;Complete proteome;Pyridoxal phosphate;Reference proteome;Transferase;	;2.6.1.83;;	2.6.1.83;	;K10206;;	K10206;	UniRef50_Q2RK33	UniRef90_A0LEA5	UniRef100_A0LEA5	Bacteria	Syntrophobacter fumaroxidans MPOB	unknown	Deltaproteobacteria	Syntrophobacterales	Syntrophobacteraceae	Syntrophobacter	Syntrophobacter fumaroxidans	Syntrophobacter fumaroxidans MPOB	8	3	1	2	0	0	0	0	0	0	2	0	0	0	0	0	0	0	0	0	0	0	0	0	0	0	0	0	0	0	0
Meta-Protein 1096	BLAST_SP0A_CLOPA Stage 0 sporulation protein A homolog OS=Clostridium pasteurianum GN=spo0A PE=3 SV=1_P52940	Activator;Calcium;Cytoplasm;DNA-binding;Metal-binding;Phosphoprotein;Repressor;Sporulation;Transcription;Transcription regulation;Two-component regulatory system;	;;;	;	;;;	;	UniRef50_P52933	UniRef90_P52933	UniRef100_P52933	Bacteria	Firmicutes	unknown	Firmicutes	Firmicutes	Firmicutes	Firmicutes	Firmicutes	Firmicutes	2	0	0	0	0	0	1	1	0	0	0	0	0	0	0	0	0	0	0	0	0	0	0	0	0	0	0	0	0	0	0
Meta-Protein 4296	BLAST_TRXM2_ORYSJ Thioredoxin M2, chloroplastic OS=Oryza sativa subsp. japonica GN=Os04g0530600 PE=2 SV=2_Q7X8R5	Chloroplast;Complete proteome;Disulfide bond;Electron transport;Plastid;Redox-active center;Reference proteome;Transit peptide;Transport;	;;;	;	;K03671;;	K03671;	UniRef50_Q7X8R5	UniRef90_Q7X8R5	UniRef100_Q7X8R5	Eukaryota	Viridiplantae	unknown	Liliopsida	Poales	Poaceae	Oryza	Oryza sativa	Oryza sativa Japonica Group	13	0	0	0	0	0	0	0	0	0	0	0	0	0	0	0	0	0	0	5	4	0	0	0	4	0	0	0	0	0	0
Meta-Protein 2736	PUR8_STRMU Adenylosuccinate lyase OS=Streptococcus mutans serotype c (strain ATCC 700610 / UA159) GN=purB PE=3 SV=2	Complete proteome;Lyase;Purine biosynthesis;Reference proteome;	;4.3.2.2;;	4.3.2.2;	;K01756;;	K01756;	UniRef50_P12047	UniRef90_P72478	UniRef100_P72478	Bacteria	Streptococcus mutans UA159	unknown	Bacilli	Lactobacillales	Streptococcaceae	Streptococcus	Streptococcus mutans	Streptococcus mutans UA159	1	1	0	0	0	0	0	0	0	0	0	0	0	0	0	0	0	0	0	0	0	0	0	0	0	0	0	0	0	0	0
Meta-Protein 110	BLAST_UGPB_BRUAB sn-glycerol-3-phosphate-binding periplasmic protein UgpB OS=Brucella abortus biovar 1 (strain 9-941) GN=ugpB PE=3 SV=1_Q578E6	3D-structure;Complete proteome;Periplasm;Reference proteome;Signal;Sugar transport;Transport;	;;;	;	;K05813;K15770;;	K05813;K15770;	UniRef50_P58300	UniRef90_P58300	EMPTY	cellular organisms	cellular organisms	unknown	cellular organisms	cellular organisms	cellular organisms	cellular organisms	cellular organisms	cellular organisms	70	10	11	10	7	4	4	5	4	3	8	1	3	0	0	0	0	0	0	0	0	0	0	0	0	0	0	0	0	0	0
Meta-Protein 1992	BLAST_RL4_AGARV 50S ribosomal protein L4 OS=Agathobacter rectalis (strain ATCC 33656 / DSM 3377 / JCM 17463 / KCTC 5835 / VPI 0990) GN=rplD PE=3 SV=1_C4ZBD5	Complete proteome;RNA-binding;Reference proteome;Ribonucleoprotein;Ribosomal protein;rRNA-binding;	;;;	;	;K02926;;	K02926;	UniRef50_P28601	UniRef90_C4ZBD5	UniRef100_C4ZBD5	Bacteria	Eubacterium rectale ATCC 33656	unknown	Clostridia	Clostridiales	Eubacteriaceae	Eubacterium	Eubacterium rectale	Eubacterium rectale ATCC 33656	1	0	0	0	0	0	0	0	0	0	0	0	0	0	0	0	0	0	0	0	0	1	0	0	0	0	0	0	0	0	0
Meta-Protein 4883	BLAST_PTAS_THETC Phosphate acetyltransferase OS=Thermoanaerobacterium thermosaccharolyticum (strain ATCC 7956 / DSM 571 / NCIB 9385 / NCA 3814) GN=pta PE=3 SV=2_Q59330	Acyltransferase;Complete proteome;Cytoplasm;Transferase;	;2.3.1.8;;	2.3.1.8;	;K00625;;	K00625;	UniRef50_P71103	UniRef90_Q59330	UniRef100_Q59330	Bacteria	Thermoanaerobacterium thermosaccharolyticum DSM 571	unknown	Clostridia	Thermoanaerobacterales	Thermoanaerobacterales Family III. Incertae Sedis	Thermoanaerobacterium	Thermoanaerobacterium thermosaccharolyticum	Thermoanaerobacterium thermosaccharolyticum DSM 571	1	0	0	0	0	0	0	0	0	0	0	0	0	0	0	0	0	0	0	0	0	0	0	0	0	1	0	0	0	0	0
Meta-Protein 858	MTSB_METMA Methylated-thiol--corrinoid protein MtsB OS=Methanosarcina mazei (strain ATCC BAA-159 / DSM 3647 / Goe1 / Go1 / JCM 11833 / OCM 88) GN=mtsB PE=3 SV=1	3D-structure;Cobalt;Complete proteome;Direct protein sequencing;Metal-binding;Reference proteome;	;;;	;	;K14081;K16955;;	K14081;K16955;	EMPTY	EMPTY	EMPTY	Archaea	Methanosarcina	unknown	Methanomicrobia	Methanosarcinales	Methanosarcinaceae	Methanosarcina	Methanosarcina	Methanosarcina	3	0	1	1	0	0	0	0	0	0	0	0	1	0	0	0	0	0	0	0	0	0	0	0	0	0	0	0	0	0	0
Meta-Protein 2829	Metagenome unknown		;;		;;					Uncategorized	Uncategorized	unknown	Uncategorized	Uncategorized	Uncategorized	Uncategorized	Uncategorized	Uncategorized	131	24	23	17	7	7	5	7	8	10	11	4	6	0	0	0	0	1	1	0	0	0	0	0	0	0	0	0	0	0	0
Meta-Protein 910	RBL_FAGEA Ribulose bisphosphate carboxylase large chain OS=Fagopyrum esculentum subsp. ancestrale GN=rbcL PE=3 SV=1	3D-structure;Acetylation;Calvin cycle;Carbon dioxide fixation;Chloroplast;Complete proteome;Direct protein sequencing;Disulfide bond;Hydroxylation;Lyase;Magnesium;Metal-binding;Methylation;Mitochondrion;Monooxygenase;NADP;Nucleotide-binding;Oxidoreductase;Phosphoprotein;Photorespiration;Photosynthesis;Plastid;RNA editing;Reference proteome;Stress response;	;;4.1.1.39;;	;4.1.1.39;	;;K01601;;	;K01601;	UniRef50_P00877	EMPTY	EMPTY	cellular organisms	cellular organisms	unknown	cellular organisms	cellular organisms	cellular organisms	cellular organisms	cellular organisms	cellular organisms	9	0	0	0	1	0	3	1	1	3	0	0	0	0	0	0	0	0	0	0	0	0	0	0	0	0	0	0	0	0	0
Meta-Protein 245	OMPA_SERMA Outer membrane protein A OS=Serratia marcescens GN=ompA PE=3 SV=1	3D-structure;Cell outer membrane;Complete proteome;Conjugation;Direct protein sequencing;Disulfide bond;Ion transport;Membrane;Porin;Reference proteome;Repeat;Signal;Transmembrane;Transmembrane beta strand;Transport;	;;;	;	;;K03286;;	;K03286;	UniRef50_Q8ZG77	UniRef90_P80444	UniRef100_P80444	Bacteria	Gammaproteobacteria	unknown	Gammaproteobacteria	Gammaproteobacteria	Gammaproteobacteria	Gammaproteobacteria	Gammaproteobacteria	Gammaproteobacteria	74	7	4	5	3	3	2	2	3	2	1	0	0	0	0	0	0	0	0	0	0	0	0	0	0	8	2	7	0	0	0
Meta-Protein 778	ENO_LACF3 Enolase OS=Lactobacillus fermentum (strain NBRC 3956 / LMG 18251) GN=eno PE=3 SV=1	Complete proteome;Cytoplasm;Glycolysis;Lyase;Magnesium;Metal-binding;Reference proteome;Secreted;	;4.2.1.11;;	4.2.1.11;	;K01689;;	K01689;	UniRef50_P42848	UniRef90_Q89Z05	UniRef100_Q89Z05	Bacteria	Bacteria	unknown	Bacteria	Bacteria	Bacteria	Bacteria	Bacteria	Bacteria	104	3	1	0	1	0	2	0	0	0	2	0	0	0	0	0	0	0	0	18	16	6	15	9	10	4	0	5	2	3	4
Meta-Protein 420	Metagenome unknown		;;		;;					Uncategorized	Uncategorized	unknown	Uncategorized	Uncategorized	Uncategorized	Uncategorized	Uncategorized	Uncategorized	68	14	11	13	4	4	2	5	3	2	6	2	2	0	0	0	0	0	0	0	0	0	0	0	0	0	0	0	0	0	0
Meta-Protein 5050	ENO_PENCI Enolase OS=Penicillium citrinum GN=enoA PE=1 SV=3	Allergen;Cytoplasm;Direct protein sequencing;Glycolysis;Lyase;Magnesium;Metal-binding;	;4.2.1.11;;	4.2.1.11;	;;;	;	UniRef50_Q96X46	UniRef90_Q96X46	UniRef100_Q96X46	Eukaryota	Fungi	unknown	Eurotiomycetes	Eurotiales	Trichocomaceae	Penicillium	Penicillium citrinum	Penicillium citrinum	6	0	0	0	0	0	0	0	0	0	0	0	0	0	0	0	0	0	0	0	0	0	0	0	0	0	0	0	0	0	0
Meta-Protein 4345	BLAST_BGH3B_BACO1 Beta-glucosidase BoGH3B OS=Bacteroides ovatus (strain ATCC 8483 / DSM 1896 / JCM 5824 / NCTC 11153) GN=BACOVA_02659 PE=1 SV=1_A7LXU3	3D-structure;Carbohydrate metabolism;Complete proteome;Glycosidase;Hydrolase;Periplasm;Polysaccharide degradation;Signal;	;3.2.1.21;;	3.2.1.21;	;;;	;	UniRef50_A7LXU3	UniRef90_A7LXU3	UniRef100_A7LXU3	Bacteria	Bacteroides ovatus ATCC 8483	unknown	Bacteroidia	Bacteroidales	Bacteroidaceae	Bacteroides	Bacteroides ovatus	Bacteroides ovatus ATCC 8483	6	0	0	0	0	0	0	0	0	0	0	0	0	0	0	0	0	0	0	2	1	0	0	0	2	0	0	0	0	0	1
Meta-Protein 4793	Metagenome Unknown		;;		;;					Uncategorized	Uncategorized	unknown	Uncategorized	Uncategorized	Uncategorized	Uncategorized	Uncategorized	Uncategorized	2	0	0	0	0	0	0	0	0	0	0	0	0	0	0	0	0	0	0	0	0	0	0	0	0	1	1	0	0	0	0
Meta-Protein 3452	BLAST_POTA_ONYPE Spermidine/putrescine import ATP-binding protein PotA OS=Onion yellows phytoplasma (strain OY-M) GN=potA PE=3 SV=1_Q6YPR6	ATP-binding;Cell membrane;Complete proteome;Hydrolase;Membrane;Nucleotide-binding;Reference proteome;Transport;	;3.6.3.31;;	3.6.3.31;	;K11072;;	K11072;	UniRef50_Q6YPR6	UniRef90_Q6YPR6	UniRef100_Q6YPR6	Bacteria	Onion yellows phytoplasma OY-M	unknown	Mollicutes	Acholeplasmatales	Acholeplasmataceae	Candidatus Phytoplasma	Onion yellows phytoplasma	Onion yellows phytoplasma OY-M	18	0	2	4	0	0	2	0	0	0	3	3	4	0	0	0	0	0	0	0	0	0	0	0	0	0	0	0	0	0	0
Meta-Protein 2217	BLAST_KDGK_THET8 2-dehydro-3-deoxygluconokinase OS=Thermus thermophilus (strain HB8 / ATCC 27634 / DSM 579) GN=kdgK PE=1 SV=1_Q53W83	3D-structure;ATP-binding;Carbohydrate metabolism;Complete proteome;Direct protein sequencing;Kinase;Nucleotide-binding;Plasmid;Reference proteome;Transferase;	;2.7.1.4;2.7.1.45;;	2.7.1.4;2.7.1.45;	;;K00847;K00874;;	;K00847;K00874;	UniRef50_Q53W83	UniRef90_Q53W83	UniRef100_Q53W83	cellular organisms	cellular organisms	unknown	cellular organisms	cellular organisms	cellular organisms	cellular organisms	cellular organisms	cellular organisms	1	0	0	0	0	0	0	0	0	0	0	0	0	0	0	0	0	0	0	0	0	0	0	0	1	0	0	0	0	0	0
Meta-Protein 3883	CPHA_CYAA5 Cyanophycin synthetase OS=Cyanothece sp. (strain ATCC 51142) GN=cphA PE=3 SV=1	ATP-binding;Complete proteome;Ligase;Nucleotide-binding;Reference proteome;	;6.3.2.29;6.3.2.30;;	6.3.2.29;6.3.2.30;	;K03802;;	K03802;	UniRef50_P56947	UniRef90_Q9KGY4	UniRef100_Q9KGY4	Bacteria	Cyanothece sp. ATCC 51142	unknown	Cyanothece sp. ATCC 51142	Chroococcales	Cyanothece sp. ATCC 51142	Cyanothece	Cyanothece sp. ATCC 51142	Cyanothece sp. ATCC 51142	1	0	0	0	0	0	1	0	0	0	0	0	0	0	0	0	0	0	0	0	0	0	0	0	0	0	0	0	0	0	0
Meta-Protein 696	ATPA_SACHY ATP synthase subunit alpha, chloroplastic OS=Saccharum hybrid GN=atpA PE=2 SV=2	3D-structure;ATP synthesis;ATP-binding;Acetylation;Alternative splicing;CF(1);Cell inner membrane;Cell membrane;Chloroplast;Complete proteome;Cyanelle;Direct protein sequencing;Disease mutation;Glycoprotein;Hydrogen ion transport;Hydrolase;Ion transport;Isopeptide bond;Membrane;Methylation;Mitochondrion;Mitochondrion inner membrane;Nucleotide-binding;Phosphoprotein;Plasmid;Plastid;Polymorphism;Pr…	;;3.6.3.14;3.6.3.15;;	;3.6.3.14;3.6.3.15;	;;K02111;K02112;K02115;K02132;;	;K02111;K02112;K02115;K02132;	UniRef50_P72245	UniRef90_P12985	EMPTY	cellular organisms	cellular organisms	unknown	cellular organisms	cellular organisms	cellular organisms	cellular organisms	cellular organisms	cellular organisms	243	4	4	2	8	7	3	5	7	7	0	0	0	0	0	0	1	1	0	6	5	8	10	8	5	3	2	2	3	0	1
Meta-Protein 138	BLAST_GALE_BACSU UDP-glucose 4-epimerase OS=Bacillus subtilis (strain 168) GN=galE PE=3 SV=1_P55180	Carbohydrate metabolism;Complete proteome;Galactose metabolism;Isomerase;NAD;Reference proteome;	;5.1.3.2;;	5.1.3.2;	;K01784;;	K01784;	UniRef50_P55180	UniRef90_P55180	UniRef100_P55180	Bacteria	Bacillus subtilis subsp. subtilis str. 168	unknown	Bacilli	Bacillales	Bacillaceae	Bacillus	Bacillus subtilis subsp. subtilis str. 168	Bacillus subtilis subsp. subtilis	7	1	2	1	0	0	0	1	1	0	1	0	0	0	0	0	0	0	0	0	0	0	0	0	0	0	0	0	0	0	0
Meta-Protein 3943	Metagenome unknown		;;		;;					Uncategorized	Uncategorized	unknown	Uncategorized	Uncategorized	Uncategorized	Uncategorized	Uncategorized	Uncategorized	3	0	0	0	0	0	1	0	1	1	0	0	0	0	0	0	0	0	0	0	0	0	0	0	0	0	0	0	0	0	0
Meta-Protein 1343	BLAST_RL31B_PARD8 50S ribosomal protein L31 type B OS=Parabacteroides distasonis (strain ATCC 8503 / DSM 20701 / CIP 104284 / JCM 5825 / NCTC 11152) GN=rpmE2 PE=3 SV=1_A6LDB6	Complete proteome;Reference proteome;Ribonucleoprotein;Ribosomal protein;	;;;	;	;K02909;;	K02909;	EMPTY	EMPTY	EMPTY	Bacteria	Bacteroidales	unknown	Bacteroidia	Bacteroidales	Bacteroidales	Bacteroidales	Bacteroidales	Bacteroidales	30	0	0	0	0	0	0	0	0	0	0	0	0	0	0	0	0	0	0	1	0	8	4	4	2	1	0	1	0	1	0
Meta-Protein 4728	BLAST_PCCB_HALMT Propionyl-CoA carboxylase, carboxyltransferase subunit OS=Haloferax mediterranei (strain ATCC 33500 / DSM 1411 / JCM 8866 / NBRC 14739 / NCIMB 2177 / R-4) GN=pccB PE=1 SV=1_I3R7F1	Complete proteome;Ligase;Lyase;Reference proteome;	;6.4.1.3;;	6.4.1.3;	;K19312;;	K19312;	UniRef50_P07633	UniRef90_I3R7F1	UniRef100_I3R7F1	Archaea	Haloferax mediterranei ATCC 33500	unknown	Halobacteria	Halobacteriales	Halobacteriaceae	Haloferax	Haloferax mediterranei	Haloferax mediterranei ATCC 33500	1	0	0	0	0	0	0	0	0	0	0	0	0	0	0	0	0	0	0	0	0	0	0	1	0	0	0	0	0	0	0
Meta-Protein 230	Metagenome unknown	Cell membrane;Complete proteome;Lipoprotein;Membrane;Palmitate;Reference proteome;Signal;Sugar transport;Transport;	;;;	;	;K10117;K17234;;	K10117;K17234;	UniRef50_O32156	UniRef90_O32156	UniRef100_O32156	Bacteria	Bacillus	unknown	Bacilli	Bacillales	Bacillaceae	Bacillus	Bacillus	Bacillus	139	26	29	25	17	8	6	9	6	8	3	1	1	0	0	0	0	0	0	0	0	0	0	0	0	0	0	0	0	0	0
Meta-Protein 697	BLAST_AGAL_ECOLI Alpha-galactosidase OS=Escherichia coli (strain K12) GN=melA PE=1 SV=1_P06720	Carbohydrate metabolism;Complete proteome;Direct protein sequencing;Glycosidase;Hydrolase;Manganese;Metal-binding;NAD;Reference proteome;	;3.2.1.22;;	3.2.1.22;	;K07406;;	K07406;	UniRef50_P06720	EMPTY	EMPTY	Bacteria	Bacteria	unknown	Bacteria	Bacteria	Bacteria	Bacteria	Bacteria	Bacteria	7	2	2	1	0	1	0	0	1	0	0	0	0	0	0	0	0	0	0	0	0	0	0	0	0	0	0	0	0	0	0
Meta-Protein 959	BLAST_PDTAR_MYCTU Probable transcriptional regulatory protein pdtaR OS=Mycobacterium tuberculosis (strain ATCC 25618 / H37Rv) GN=pdtaR PE=1 SV=1_P9WGM3	3D-structure;Acetylation;Complete proteome;Phosphoprotein;Reference proteome;Transcription;Transcription antitermination;Transcription regulation;Two-component regulatory system;	;;;	;	;K22010;;	K22010;	UniRef50_P9WGM2	UniRef90_P9WGM2	UniRef100_P9WGM2	Bacteria	Mycobacterium tuberculosis	unknown	Actinobacteria	Actinomycetales	Mycobacteriaceae	Mycobacterium	Mycobacterium tuberculosis	Mycobacterium tuberculosis	33	0	0	0	4	2	10	4	6	6	0	0	0	1	0	0	0	0	0	0	0	0	0	0	0	0	0	0	0	0	0
Meta-Protein 2331	BLAST_SUSD_BACTN Starch-binding protein SusD OS=Bacteroides thetaiotaomicron (strain ATCC 29148 / DSM 2079 / NCTC 10582 / E50 / VPI-5482) GN=susD PE=1 SV=1_Q8A1G2	3D-structure;Calcium;Carbohydrate metabolism;Cell outer membrane;Complete proteome;Lipoprotein;Membrane;Metal-binding;Palmitate;Reference proteome;Signal;	;;;	;	;K21572;;	K21572;	UniRef50_Q8A1G2	UniRef90_Q8A1G2	UniRef100_Q8A1G2	Bacteria	Bacteroides thetaiotaomicron VPI-5482	unknown	Bacteroidia	Bacteroidales	Bacteroidaceae	Bacteroides	Bacteroides thetaiotaomicron	Bacteroides thetaiotaomicron VPI-5482	17	0	0	0	0	0	0	0	0	0	0	0	0	0	0	0	0	0	0	0	0	0	0	0	0	9	2	6	0	0	0
Meta-Protein 4237	BLAST_RECF_GLOVI DNA replication and repair protein RecF OS=Gloeobacter violaceus (strain PCC 7421) GN=recF PE=3 SV=1_Q7NHY0	ATP-binding;Complete proteome;Cytoplasm;DNA damage;DNA repair;DNA replication;DNA-binding;Nucleotide-binding;Reference proteome;SOS response;	;;;	;	;K03629;;	K03629;	UniRef50_Q7NHY0	UniRef90_Q7NHY0	UniRef100_Q7NHY0	Bacteria	Gloeobacter violaceus PCC 7421	unknown	Gloeobacteria	Gloeobacterales	Gloeobacter violaceus PCC 7421	Gloeobacter	Gloeobacter violaceus	Gloeobacter violaceus PCC 7421	1	0	0	0	0	0	0	0	0	0	1	0	0	0	0	0	0	0	0	0	0	0	0	0	0	0	0	0	0	0	0
Meta-Protein 4158	Metagenome unknown		;;		;;					Uncategorized	Uncategorized	unknown	Uncategorized	Uncategorized	Uncategorized	Uncategorized	Uncategorized	Uncategorized	2	0	0	0	0	0	0	0	0	0	1	1	0	0	0	0	0	0	0	0	0	0	0	0	0	0	0	0	0	0	0
Meta-Protein 2446	BLAST_HBD_CLOAB 3-hydroxybutyryl-CoA dehydrogenase OS=Clostridium acetobutylicum (strain ATCC 824 / DSM 792 / JCM 1419 / LMG 5710 / VKM B-1787) GN=hbd PE=1 SV=2_P52041	Complete proteome;Fatty acid metabolism;Lipid metabolism;NADP;Oxidoreductase;Reference proteome;	;1.1.1.157;;	1.1.1.157;	;K00074;;	K00074;	UniRef50_Q0AVM2	UniRef90_P52041	UniRef100_P52041	Bacteria	Clostridia	unknown	Clostridia	Clostridia	Clostridia	Clostridia	Clostridia	Clostridia	16	0	0	0	0	0	0	0	0	0	0	0	0	0	0	0	0	0	0	0	0	0	0	0	0	1	3	0	2	0	0
Meta-Protein 2790	BLAST_OPPA_BACSU Oligopeptide-binding protein OppA OS=Bacillus subtilis (strain 168) GN=oppA PE=1 SV=1_P24141	Cell membrane;Competence;Complete proteome;Lipoprotein;Membrane;Palmitate;Peptide transport;Phosphoprotein;Protein transport;Reference proteome;Signal;Sporulation;Transport;	;;;	;	;K15580;;	K15580;	UniRef50_P24141	UniRef90_P24141	UniRef100_P24141	Bacteria	Bacillus subtilis subsp. subtilis str. 168	unknown	Bacilli	Bacillales	Bacillaceae	Bacillus	Bacillus subtilis subsp. subtilis str. 168	Bacillus subtilis subsp. subtilis	8	2	1	2	1	0	1	0	0	0	1	0	0	0	0	0	0	0	0	0	0	0	0	0	0	0	0	0	0	0	0
Meta-Protein 2961	BLAST_DBH_LACLA DNA-binding protein HU OS=Lactococcus lactis subsp. lactis (strain IL1403) GN=hup PE=3 SV=1_Q9CI64	3D-structure;Complete proteome;DNA condensation;DNA-binding;Reference proteome;	;;;	;	;K03530;;	K03530;	UniRef50_P68573	UniRef90_Q9CI64	UniRef100_Q9CI64	Bacteria	Lactococcus lactis subsp. lactis Il1403	unknown	Bacilli	Lactobacillales	Streptococcaceae	Lactococcus	Lactococcus lactis subsp. lactis Il1403	Lactococcus lactis subsp. lactis	33	1	1	2	1	1	2	5	2	2	2	2	3	1	1	1	2	2	2	0	0	0	0	0	0	0	0	0	0	0	0
Meta-Protein 4648	BLAST_Y258_BACTN Putative glucosamine-6-phosphate deaminase-like protein BT_0258 OS=Bacteroides thetaiotaomicron (strain ATCC 29148 / DSM 2079 / NCTC 10582 / E50 / VPI-5482) GN=BT_0258 PE=3 SV=1_Q8AB53	Complete proteome;Reference proteome;	;;;	;	;K02564;;	K02564;	UniRef50_Q8AB53	UniRef90_Q8AB53	UniRef100_Q8AB53	Bacteria	Bacteroides thetaiotaomicron VPI-5482	unknown	Bacteroidia	Bacteroidales	Bacteroidaceae	Bacteroides	Bacteroides thetaiotaomicron	Bacteroides thetaiotaomicron VPI-5482	1	0	0	0	0	0	0	0	0	0	0	0	0	0	0	0	0	0	0	0	0	0	1	0	0	0	0	0	0	0	0
Meta-Protein 2484	BLAST_IOLG4_SACEN Inositol 2-dehydrogenase 4 OS=Saccharopolyspora erythraea (strain ATCC 11635 / DSM 40517 / JCM 4748 / NBRC 13426 / NCIMB 8594 / NRRL 2338) GN=iolG4 PE=3 SV=1_A4FK61	Complete proteome;NAD;Oxidoreductase;Reference proteome;	;1.1.1.18;;	1.1.1.18;	;K00010;;	K00010;	UniRef50_A6WFC5	UniRef90_A4FK61	UniRef100_A4FK61	Bacteria	Saccharopolyspora erythraea NRRL 2338	unknown	Actinobacteria	Actinomycetales	Pseudonocardiaceae	Saccharopolyspora	Saccharopolyspora erythraea	Saccharopolyspora erythraea NRRL 2338	1	0	0	0	0	0	0	0	0	0	0	0	0	0	0	0	0	0	0	0	0	0	0	0	0	0	1	0	0	0	0
Meta-Protein 674	BLAST_PURE_PYRAB N5-carboxyaminoimidazole ribonucleotide mutase OS=Pyrococcus abyssi (strain GE5 / Orsay) GN=purE PE=3 SV=1_Q9UY68	3D-structure;Complete proteome;Isomerase;Purine biosynthesis;Reference proteome;	;5.4.99.18;;	5.4.99.18;	;K01588;;	K01588;	UniRef50_Q9UY68	UniRef90_Q9UY68	UniRef100_Q9UY68	cellular organisms	cellular organisms	unknown	cellular organisms	cellular organisms	cellular organisms	cellular organisms	cellular organisms	cellular organisms	7	2	2	2	0	0	1	0	0	0	0	0	0	0	0	0	0	0	0	0	0	0	0	0	0	0	0	0	0	0	0
Meta-Protein 2495	BLAST_SUDHA_PYRFU Sulfide dehydrogenase subunit alpha OS=Pyrococcus furiosus (strain ATCC 43587 / DSM 3638 / JCM 8422 / Vc1) GN=sudA PE=1 SV=1_Q8U195	3D-structure;3Fe-4S;4Fe-4S;Complete proteome;Cytoplasm;Direct protein sequencing;FAD;Flavoprotein;Iron;Iron-sulfur;Metal-binding;NADP;Oxidoreductase;Reference proteome;	;1.18.1.2;1.8.1.19;;	1.18.1.2;1.8.1.19;	;K20202;;	K20202;	UniRef50_Q8U195	UniRef90_Q8U195	UniRef100_Q8U195	Archaea	Pyrococcus furiosus DSM 3638	unknown	Thermococci	Thermococcales	Thermococcaceae	Pyrococcus	Pyrococcus furiosus	Pyrococcus furiosus DSM 3638	1	0	0	0	0	0	0	0	0	0	0	0	0	0	0	0	0	0	0	0	0	0	0	0	0	0	1	0	0	0	0
Meta-Protein 2690	BLAST_ILVC_LEPCP Ketol-acid reductoisomerase (NADP(+)) OS=Leptothrix cholodnii (strain ATCC 51168 / LMG 8142 / SP-6) GN=ilvC PE=3 SV=1_B1XYB1	Amino-acid biosynthesis;Branched-chain amino acid biosynthesis;Complete proteome;Leucine biosynthesis;Magnesium;Metal-binding;NADP;Nucleotide-binding;Oxidoreductase;Reference proteome;Transferase;	;1.1.1.86;2.3.3.13;;	1.1.1.86;2.3.3.13;	;K00053;K01649;;	K00053;K01649;	UniRef50_O67862	UniRef90_Q12B47	UniRef100_Q12B47	Bacteria	Burkholderiales	unknown	Betaproteobacteria	Burkholderiales	Burkholderiales	Burkholderiales	Burkholderiales	Burkholderiales	2	0	0	0	0	0	0	0	0	0	0	0	0	0	0	0	0	0	0	0	0	0	0	0	0	0	0	0	0	0	0
Meta-Protein 5189	BLAST_ALGE7_AZOVI Alginate lyase 7 OS=Azotobacter vinelandii GN=algE7 PE=1 SV=1_Q9ZFG9	Alginate biosynthesis;Calcium;Isomerase;Lyase;Repeat;Secreted;	;4.2.2.3;5.1.3.37;;	4.2.2.3;5.1.3.37;	;;;	;	UniRef50_Q9ZFG9	UniRef90_Q9ZFG9	UniRef100_Q9ZFG9	Bacteria	Azotobacter vinelandii	unknown	Gammaproteobacteria	Pseudomonadales	Pseudomonadaceae	Azotobacter	Azotobacter vinelandii	Azotobacter vinelandii	7	0	0	0	0	0	0	0	0	0	0	0	0	0	0	0	0	0	0	0	0	0	0	0	0	0	0	0	0	0	0
Meta-Protein 2666	BLAST_HCD2_BOVIN 3-hydroxyacyl-CoA dehydrogenase type-2 OS=Bos taurus GN=HSD17B10 PE=1 SV=3_O02691	3D-structure;Acetylation;Alternative splicing;Chromosomal rearrangement;Complete proteome;Direct protein sequencing;Disease mutation;Mental retardation;Mitochondrion;NAD;Neurodegeneration;Oxidoreductase;Reference proteome;tRNA processing;	;1.-.-.-;1.1.1.178;1.1.1.35;1.1.1.51;;	1.-.-.-;1.1.1.178;1.1.1.35;1.1.1.51;	;;K08683;;	;K08683;	UniRef50_P9WGQ6	UniRef90_P9WGQ6	UniRef100_P9WGQ6	cellular organisms	cellular organisms	unknown	cellular organisms	cellular organisms	cellular organisms	cellular organisms	cellular organisms	cellular organisms	5	0	0	0	0	0	0	0	0	0	0	0	0	0	0	0	0	0	0	0	0	0	0	0	0	0	0	0	0	0	0
Meta-Protein 440	BLAST_CH60_PARD8 60 kDa chaperonin OS=Parabacteroides distasonis (strain ATCC 8503 / DSM 20701 / CIP 104284 / JCM 5825 / NCTC 11152) GN=groL PE=3 SV=1_A6LIG0	ATP-binding;Chaperone;Complete proteome;Cytoplasm;Nucleotide-binding;Reference proteome;	;;;	;	;;K04077;;	;K04077;	UniRef50_P35635	UniRef90_Q9XCA9	UniRef100_Q9XCA9	Bacteria	Bacteria	unknown	Bacteria	Bacteria	Bacteria	Bacteria	Bacteria	Bacteria	80	1	2	1	12	9	22	5	12	10	0	1	1	0	1	0	1	1	1	0	0	0	0	0	0	0	0	0	0	0	0
Meta-Protein 735	BLAST_NOLF_RHIME Nodulation protein NolF OS=Rhizobium meliloti (strain 1021) GN=nolF PE=3 SV=2_P25196	Antibiotic resistance;Coiled coil;Complete proteome;Nodulation;Periplasm;Plasmid;Reference proteome;Signal;Transport;	;;;	;	;;K03585;;	;K03585;	UniRef50_Q8G2M7	UniRef90_Q8G2M7	UniRef100_Q8G2M7	Bacteria	Rhizobiales	unknown	Alphaproteobacteria	Rhizobiales	Rhizobiales	Rhizobiales	Rhizobiales	Rhizobiales	13	3	1	3	3	3	0	0	0	0	0	0	0	0	0	0	0	0	0	0	0	0	0	0	0	0	0	0	0	0	0
Meta-Protein 1155	BLAST_DTD_SYMTH D-aminoacyl-tRNA deacylase OS=Symbiobacterium thermophilum (strain T / IAM 14863) GN=dtd PE=3 SV=1_Q67LN1	Complete proteome;Cytoplasm;Hydrolase;RNA-binding;Reference proteome;tRNA-binding;	;3.1.1.-;3.1.1.96;;	3.1.1.-;3.1.1.96;	;K07560;;	K07560;	EMPTY	EMPTY	EMPTY	Bacteria	Clostridia	unknown	Clostridia	Clostridia	Clostridia	Clostridia	Clostridia	Clostridia	1	0	0	0	0	0	0	1	0	0	0	0	0	0	0	0	0	0	0	0	0	0	0	0	0	0	0	0	0	0	0
Meta-Protein 694	BLAST_PNP_HELMI Polyribonucleotide nucleotidyltransferase OS=Heliobacterium modesticaldum (strain ATCC 51547 / Ice1) GN=pnp PE=3 SV=1_B0THS2	Complete proteome;Cytoplasm;Magnesium;Metal-binding;Nucleotidyltransferase;RNA-binding;Reference proteome;Transferase;	;2.7.7.8;;	2.7.7.8;	;K00962;;	K00962;	UniRef50_Q2IQ01	UniRef90_B0THS2	UniRef100_B0THS2	Bacteria	Bacteria	unknown	Bacteria	Bacteria	Bacteria	Bacteria	Bacteria	Bacteria	8	2	3	1	0	0	0	1	0	0	1	0	0	0	0	0	0	0	0	0	0	0	0	0	0	0	0	0	0	0	0
Meta-Protein 1831	VDAC1_BOVIN Voltage-dependent anion-selective channel protein 1 OS=Bos taurus GN=VDAC1 PE=1 SV=3	3D-structure;Acetylation;Alternative splicing;Apoptosis;Cell membrane;Complete proteome;Direct protein sequencing;Host-virus interaction;Ion transport;Isopeptide bond;Membrane;Mitochondrion;Mitochondrion outer membrane;NAD;Nucleotide-binding;Phosphoprotein;Porin;Reference proteome;Transmembrane;Transmembrane beta strand;Transport;Ubl conjugation;	;;;	;	;K05862;K15041;;	K05862;K15041;	EMPTY	EMPTY	EMPTY	Eukaryota	Metazoa	unknown	Mammalia	Eutheria	Eutheria	Eutheria	Eutheria	Eutheria	6	0	0	0	0	0	0	0	0	0	0	0	0	0	0	0	0	0	0	0	1	0	0	0	2	0	0	0	0	1	1
Meta-Protein 3481	BLAST_HRCA_PELTS Heat-inducible transcription repressor HrcA OS=Pelotomaculum thermopropionicum (strain DSM 13744 / JCM 10971 / SI) GN=hrcA PE=3 SV=1_A5D3X8	Complete proteome;Reference proteome;Repressor;Stress response;Transcription;Transcription regulation;	;;;	;	;K03705;;	K03705;	UniRef50_B1I6D9	UniRef90_A5D3X8	UniRef100_A5D3X8	Bacteria	Pelotomaculum thermopropionicum SI	unknown	Clostridia	Clostridiales	Peptococcaceae	Pelotomaculum	Pelotomaculum thermopropionicum	Pelotomaculum thermopropionicum SI	2	0	0	1	0	0	0	1	0	0	0	0	0	0	0	0	0	0	0	0	0	0	0	0	0	0	0	0	0	0	0
Meta-Protein 1200	BLAST_HEMTB_METCA Bacteriohemerythrin OS=Methylococcus capsulatus (strain ATCC 33009 / NCIMB 11132 / Bath) GN=MCA0715 PE=1 SV=1_Q60AX2	3D-structure;Complete proteome;Iron;Metal-binding;Oxygen transport;Reference proteome;Transport;	;;;	;	;;K07216;;	;K07216;	EMPTY	EMPTY	EMPTY	Bacteria	Proteobacteria	unknown	Proteobacteria	Proteobacteria	Proteobacteria	Proteobacteria	Proteobacteria	Proteobacteria	1	0	0	0	0	0	0	0	0	0	1	0	0	0	0	0	0	0	0	0	0	0	0	0	0	0	0	0	0	0	0
Meta-Protein 3691	BLAST_BAMA_HELPY Outer membrane protein assembly factor BamA OS=Helicobacter pylori (strain ATCC 700392 / 26695) GN=bamA PE=3 SV=1_O25369	Cell outer membrane;Complete proteome;Membrane;Reference proteome;Repeat;Signal;Transmembrane;Transmembrane beta strand;	;;;	;	;K07277;;	K07277;	UniRef50_O25369	UniRef90_O25369	UniRef100_O25369	Bacteria	Helicobacter pylori 26695	unknown	Epsilonproteobacteria	Campylobacterales	Helicobacteraceae	Helicobacter	Helicobacter pylori	Helicobacter pylori 26695	6	0	0	0	2	3	0	0	0	1	0	0	0	0	0	0	0	0	0	0	0	0	0	0	0	0	0	0	0	0	0
Meta-Protein 3473	Metagenome unknown		;;		;;					Uncategorized	Uncategorized	unknown	Uncategorized	Uncategorized	Uncategorized	Uncategorized	Uncategorized	Uncategorized	3	0	0	1	0	0	0	0	0	0	1	1	0	0	0	0	0	0	0	0	0	0	0	0	0	0	0	0	0	0	0
Meta-Protein 5192	Metagenome unknown		;;		;;					Uncategorized	Uncategorized	unknown	Uncategorized	Uncategorized	Uncategorized	Uncategorized	Uncategorized	Uncategorized	4	0	0	0	0	0	0	0	0	0	0	0	0	0	0	0	0	0	0	0	0	0	0	0	0	0	0	0	0	0	0
Meta-Protein 1506	PFP_SPITD Pyrophosphate--fructose 6-phosphate 1-phosphotransferase OS=Spirochaeta thermophila (strain ATCC 49972 / DSM 6192 / RI 19.B1) GN=pfp PE=1 SV=1	Complete proteome;Cytoplasm;Direct protein sequencing;Glycolysis;Kinase;Magnesium;Metal-binding;Reference proteome;Transferase;	;2.7.1.90;;	2.7.1.90;	;;K00895;;	;K00895;	UniRef50_P70826	UniRef90_Q9FAF8	UniRef100_Q9FAF8	cellular organisms	cellular organisms	unknown	cellular organisms	cellular organisms	cellular organisms	cellular organisms	cellular organisms	cellular organisms	114	0	0	0	0	0	0	0	0	0	0	0	0	0	0	0	0	0	0	12	8	8	22	14	10	6	2	8	4	2	4
Meta-Protein 759	BLAST_DPS_PORG3 DNA protection during starvation protein OS=Porphyromonas gingivalis (strain ATCC 33277 / DSM 20709 / CIP 103683 / JCM 12257 / NCTC 11834 / 2561) GN=dps PE=1 SV=1_B2RMG0	3D-structure;Complete proteome;Cytoplasm;DNA condensation;DNA-binding;Direct protein sequencing;Iron;Iron storage;Metal-binding;Oxidoreductase;Reference proteome;	;1.16.-.-;;	1.16.-.-;	;;K04047;;	;K04047;	UniRef50_Q8RPQ1	UniRef90_P83695	EMPTY	Bacteria	Bacteria	unknown	Bacteria	Bacteria	Bacteria	Bacteria	Bacteria	Bacteria	14	2	2	2	0	0	0	0	0	0	5	2	1	0	0	0	0	0	0	0	0	0	0	0	0	0	0	0	0	0	0
Meta-Protein 3458	BLAST_AHPC_BACYN Alkyl hydroperoxide reductase C (Fragment) OS=Bacillus sp. (strain YN-1) PE=3 SV=1_P26830	Antioxidant;Cytoplasm;Disulfide bond;Oxidoreductase;Peroxidase;Redox-active center;	;1.11.1.15;;	1.11.1.15;	;;;	;	UniRef50_P0AE10	UniRef90_P26830	UniRef100_P26830	Bacteria	Bacillus sp. YN-1	unknown	Bacilli	Bacillales	Bacillaceae	Bacillus	Bacillus sp. YN-1	Bacillus sp. YN-1	1	0	1	0	0	0	0	0	0	0	0	0	0	0	0	0	0	0	0	0	0	0	0	0	0	0	0	0	0	0	0
Meta-Protein 2348	BLAST_PGAM2_HUMAN Phosphoglycerate mutase 2 OS=Homo sapiens GN=PGAM2 PE=1 SV=3_P15259	Complete proteome;Disease mutation;Glycogen storage disease;Glycolysis;Hydrolase;Isomerase;Phosphoprotein;Reference proteome;	;5.4.2.11;5.4.2.4;;	5.4.2.11;5.4.2.4;	;K01834;;	K01834;	UniRef50_P15259	UniRef90_P15259	UniRef100_P15259	Eukaryota	Metazoa	unknown	Mammalia	Eutheria	Eutheria	Eutheria	Eutheria	Eutheria	5	0	0	0	0	0	0	0	0	0	0	0	0	0	0	0	0	0	0	0	0	0	0	0	0	3	0	2	0	0	0
Meta-Protein 4707	BLAST_RL13_SYNFM 50S ribosomal protein L13 OS=Syntrophobacter fumaroxidans (strain DSM 10017 / MPOB) GN=rplM PE=3 SV=1_A0LIV4	Complete proteome;Reference proteome;Ribonucleoprotein;Ribosomal protein;	;;;	;	;K02871;;	K02871;	UniRef50_Q748X4	UniRef90_A0LIV4	UniRef100_A0LIV4	Bacteria	Syntrophobacter fumaroxidans MPOB	unknown	Deltaproteobacteria	Syntrophobacterales	Syntrophobacteraceae	Syntrophobacter	Syntrophobacter fumaroxidans	Syntrophobacter fumaroxidans MPOB	11	0	0	0	0	0	0	0	0	0	0	0	0	0	0	0	0	0	0	0	0	0	3	3	3	0	0	0	1	1	0
Meta-Protein 3509	BLAST_HSLO_ALKMQ 33 kDa chaperonin OS=Alkaliphilus metalliredigens (strain QYMF) GN=hslO PE=3 SV=1_A6TNN7	Chaperone;Complete proteome;Cytoplasm;Disulfide bond;Redox-active center;Reference proteome;Zinc;	;;;	;	;K04083;;	K04083;	UniRef50_A8MIA8	UniRef90_A6TNN7	UniRef100_A6TNN7	Bacteria	Alkaliphilus metalliredigens QYMF	unknown	Clostridia	Clostridiales	Clostridiaceae	Alkaliphilus	Alkaliphilus metalliredigens	Alkaliphilus metalliredigens QYMF	1	0	0	1	0	0	0	0	0	0	0	0	0	0	0	0	0	0	0	0	0	0	0	0	0	0	0	0	0	0	0
Meta-Protein 1375	BLAST_LIPO_BACSU Lipoprotein LipO OS=Bacillus subtilis (strain 168) GN=lipO PE=1 SV=1_P37966	Cell membrane;Complete proteome;Lipoprotein;Membrane;Palmitate;Reference proteome;Signal;	;;;	;	;K17318;;	K17318;	UniRef50_P37966	UniRef90_P37966	UniRef100_P37966	Bacteria	Bacillus subtilis subsp. subtilis str. 168	unknown	Bacilli	Bacillales	Bacillaceae	Bacillus	Bacillus subtilis subsp. subtilis str. 168	Bacillus subtilis subsp. subtilis	26	0	0	0	0	0	0	0	0	0	0	0	0	0	0	0	0	0	0	5	6	2	8	3	2	0	0	0	0	0	0
Meta-Protein 5162	BLAST_OMP32_DELAC Outer membrane porin protein 32 OS=Delftia acidovorans GN=omp32 PE=1 SV=1_P24305	3D-structure;Cell outer membrane;Direct protein sequencing;Ion transport;Membrane;Porin;Pyrrolidone carboxylic acid;Signal;Transmembrane;Transmembrane beta strand;Transport;	;;;	;	;;;	;	UniRef50_P24305	UniRef90_P24305	UniRef100_P24305	Bacteria	Delftia acidovorans	unknown	Betaproteobacteria	Burkholderiales	Comamonadaceae	Delftia	Delftia acidovorans	Delftia acidovorans	1	0	0	0	0	0	0	0	0	0	0	0	0	0	0	0	0	0	0	0	0	0	0	0	0	0	0	0	0	0	0
Meta-Protein 3362	Metagenome unknown		;;		;;					Uncategorized	Uncategorized	unknown	Uncategorized	Uncategorized	Uncategorized	Uncategorized	Uncategorized	Uncategorized	3	0	1	0	1	1	0	0	0	0	0	0	0	0	0	0	0	0	0	0	0	0	0	0	0	0	0	0	0	0	0
Meta-Protein 4149	Metagenome unknown		;;		;;					Uncategorized	Uncategorized	unknown	Uncategorized	Uncategorized	Uncategorized	Uncategorized	Uncategorized	Uncategorized	2	0	0	0	0	0	0	0	0	0	0	1	0	0	0	0	0	0	1	0	0	0	0	0	0	0	0	0	0	0	0
Meta-Protein 4629	BLAST_EFTU_PEPD6 Elongation factor Tu OS=Peptoclostridium difficile (strain 630) GN=tuf1 PE=3 SV=1_Q18CE4	Complete proteome;Cytoplasm;Elongation factor;GTP-binding;Nucleotide-binding;Protein biosynthesis;Reference proteome;	;;;	;	;K02358;;	K02358;	UniRef50_Q5SHN6	UniRef90_Q18CE4	UniRef100_Q18CE4	Bacteria	Clostridium difficile 630	unknown	Clostridia	Clostridiales	Peptostreptococcaceae	Clostridium difficile 630	[Clostridium] difficile	Clostridium difficile 630	24	0	0	0	0	0	0	0	0	0	0	0	0	0	0	0	0	0	0	0	0	0	2	0	0	7	4	5	0	0	0
Meta-Protein 4930	BLAST_SUSB_BACTN Glucan 1,4-alpha-glucosidase SusB OS=Bacteroides thetaiotaomicron (strain ATCC 29148 / DSM 2079 / NCTC 10582 / E50 / VPI-5482) GN=susB PE=1 SV=1_G8JZS4	3D-structure;Calcium;Carbohydrate metabolism;Complete proteome;Glycosidase;Hydrolase;Metal-binding;Periplasm;Polysaccharide degradation;Reference proteome;Signal;	;3.2.1.3;;	3.2.1.3;	;K21574;;	K21574;	UniRef50_G8JZS4	UniRef90_G8JZS4	UniRef100_G8JZS4	Bacteria	Bacteroides thetaiotaomicron VPI-5482	unknown	Bacteroidia	Bacteroidales	Bacteroidaceae	Bacteroides	Bacteroides thetaiotaomicron	Bacteroides thetaiotaomicron VPI-5482	1	0	0	0	0	0	0	0	0	0	0	0	0	0	0	0	0	0	0	0	0	0	0	0	0	0	0	1	0	0	0
Meta-Protein 422	BLAST_MAAL_CLOTT Methylaspartate ammonia-lyase OS=Clostridium tetanomorphum PE=1 SV=1_Q05514	3D-structure;Cobalamin;Cobalt;Complete proteome;Direct protein sequencing;Lyase;Magnesium;Metal-binding;Reference proteome;	;4.3.1.2;;	4.3.1.2;	;;K04835;;	;K04835;	UniRef50_O66145	UniRef90_Q3AEJ6	UniRef100_Q3AEJ6	Bacteria	Clostridia	unknown	Clostridia	Clostridia	Clostridia	Clostridia	Clostridia	Clostridia	48	8	4	6	2	2	1	4	2	2	2	4	3	1	1	0	2	2	2	0	0	0	0	0	0	0	0	0	0	0	0
Meta-Protein 4809	BLAST_RL1_CLOTH 50S ribosomal protein L1 OS=Clostridium thermocellum (strain ATCC 27405 / DSM 1237 / NBRC 103400 / NCIMB 10682 / NRRL B-4536 / VPI 7372) GN=rplA PE=3 SV=1_A3DIZ1	Complete proteome;RNA-binding;Reference proteome;Repressor;Ribonucleoprotein;Ribosomal protein;Translation regulation;rRNA-binding;tRNA-binding;	;;;	;	;K02863;;	K02863;	UniRef50_Q6N4R5	UniRef90_A3DIZ1	UniRef100_A3DIZ1	Bacteria	Clostridium thermocellum ATCC 27405	unknown	Clostridia	Clostridiales	Clostridiaceae	Clostridium	Clostridium thermocellum	Clostridium thermocellum ATCC 27405	1	0	0	0	0	0	0	0	0	0	0	0	0	0	0	0	0	0	0	0	0	0	0	0	0	1	0	0	0	0	0
Meta-Protein 1073	BLAST_YL567_MIMIV Uncharacterized protein L567 OS=Acanthamoeba polyphaga mimivirus GN=MIMI_L567 PE=1 SV=1_Q5UR50	Coiled coil;Complete proteome;Reference proteome;Virion;	;;;	;	;;;	;	UniRef50_Q5UR50	UniRef90_Q5UR50	UniRef100_Q5UR50	Viruses	Acanthamoeba polyphaga mimivirus	unknown	Acanthamoeba polyphaga mimivirus	Acanthamoeba polyphaga mimivirus	Mimiviridae	Mimivirus	Acanthamoeba polyphaga mimivirus	Acanthamoeba polyphaga mimivirus	15	0	0	0	0	0	3	4	2	0	1	1	2	0	1	0	0	1	0	0	0	0	0	0	0	0	0	0	0	0	0
Meta-Protein 1874	BLAST_NUSA_THET8 Transcription termination/antitermination protein NusA OS=Thermus thermophilus (strain HB8 / ATCC 27634 / DSM 579) GN=nusA PE=3 SV=1_P48514	Complete proteome;Cytoplasm;RNA-binding;Reference proteome;Repeat;Transcription;Transcription antitermination;Transcription regulation;Transcription termination;	;;;	;	;K02600;;	K02600;	UniRef50_P48514	UniRef90_P48514	UniRef100_P48514	Bacteria	Bacteria	unknown	Bacteria	Bacteria	Bacteria	Bacteria	Bacteria	Bacteria	4	0	0	0	0	0	0	0	0	0	0	0	0	0	0	0	0	0	0	0	1	0	2	1	0	0	0	0	0	0	0
Meta-Protein 4803	BLAST_DSBL_LELAM Thiol:disulfide interchange protein DsbL OS=Lelliottia amnigena GN=dsbL PE=3 SV=1_Q9XDP1	Disulfide bond;Periplasm;Redox-active center;Signal;	;;;	;	;;;	;	UniRef50_P0A4L7	UniRef90_Q9XDP1	UniRef100_Q9XDP1	Bacteria	Lelliottia amnigena	unknown	Gammaproteobacteria	Enterobacteriales	Enterobacteriaceae	Lelliottia	Lelliottia amnigena	Lelliottia amnigena	5	0	0	0	0	0	0	0	0	0	0	0	0	0	0	0	0	0	0	0	0	0	0	0	0	3	0	2	0	0	0
Meta-Protein 4127	BLAST_LPXK_BACFN Tetraacyldisaccharide 4-kinase OS=Bacteroides fragilis (strain ATCC 25285 / DSM 2151 / JCM 11019 / NCTC 9343) GN=lpxK PE=3 SV=1_Q5LAA4	ATP-binding;Complete proteome;Kinase;Lipid A biosynthesis;Lipid biosynthesis;Lipid metabolism;Nucleotide-binding;Reference proteome;Transferase;	;2.7.1.130;;	2.7.1.130;	;K00912;;	K00912;	UniRef50_Q5LAA4	UniRef90_Q5LAA4	UniRef100_Q5LAA4	Bacteria	Bacteroides fragilis NCTC 9343	unknown	Bacteroidia	Bacteroidales	Bacteroidaceae	Bacteroides	Bacteroides fragilis	Bacteroides fragilis NCTC 9343	1	0	0	0	0	0	0	0	0	0	0	0	0	0	0	0	1	0	0	0	0	0	0	0	0	0	0	0	0	0	0
Meta-Protein 1792	BLAST_PURA_BACV8 Adenylosuccinate synthetase OS=Bacteroides vulgatus (strain ATCC 8482 / DSM 1447 / JCM 5826 / NBRC 14291 / NCTC 11154) GN=purA PE=3 SV=1_A6L1X1	Complete proteome;Cytoplasm;GTP-binding;Ligase;Magnesium;Metal-binding;Nucleotide-binding;Purine biosynthesis;Reference proteome;	;6.3.4.4;;	6.3.4.4;	;K01939;;	K01939;	UniRef50_Q8A6N4	UniRef90_A6L1X1	UniRef100_A6L1X1	Bacteria	Bacteroidales	unknown	Bacteroidia	Bacteroidales	Bacteroidales	Bacteroidales	Bacteroidales	Bacteroidales	22	0	0	0	0	0	0	0	0	0	0	0	0	0	0	0	0	0	0	0	1	2	6	5	2	1	0	0	0	0	0
Meta-Protein 4985	BLAST_RBSR_BACHD Ribose operon repressor OS=Bacillus halodurans (strain ATCC BAA-125 / DSM 18197 / FERM 7344 / JCM 9153 / C-125) GN=rbsR PE=3 SV=1_Q9K6K2	Complete proteome;DNA-binding;Reference proteome;Repressor;Transcription;Transcription regulation;	;;;	;	;K02529;;	K02529;	UniRef50_Q9K6K2	UniRef90_Q9K6K2	UniRef100_Q9K6K2	Bacteria	Bacillus halodurans C-125	unknown	Bacilli	Bacillales	Bacillaceae	Bacillus	Bacillus halodurans	Bacillus halodurans C-125	1	0	0	0	0	0	0	0	0	0	0	0	0	0	0	0	0	0	0	0	0	0	0	0	0	0	0	0	0	0	0
Meta-Protein 703	BLAST_FLA_CLOTY Flagellin (Fragment) OS=Clostridium tyrobutyricum GN=fla PE=1 SV=2_P80583	Bacterial flagellum;Direct protein sequencing;Secreted;	;;;	;	;;;	;	UniRef50_P80583	UniRef90_P80583	UniRef100_P80583	Bacteria	Clostridium tyrobutyricum	unknown	Clostridia	Clostridiales	Clostridiaceae	Clostridium	Clostridium tyrobutyricum	Clostridium tyrobutyricum	26	6	5	5	3	2	1	2	1	0	1	0	0	0	0	0	0	0	0	0	0	0	0	0	0	0	0	0	0	0	0
Meta-Protein 2535	BLAST_DNAK_CLOCE Chaperone protein DnaK OS=Clostridium cellulolyticum (strain ATCC 35319 / DSM 5812 / JCM 6584 / H10) GN=dnaK PE=3 SV=1_B8I305	ATP-binding;Chaperone;Complete proteome;Nucleotide-binding;Phosphoprotein;Reference proteome;Stress response;	;;;	;	;;K04043;;	;K04043;	UniRef50_P39987	UniRef90_B8I305	UniRef100_B8I305	Bacteria	Firmicutes	unknown	Firmicutes	Firmicutes	Firmicutes	Firmicutes	Firmicutes	Firmicutes	1	0	0	0	0	0	0	0	0	0	0	0	0	0	0	0	0	0	0	0	0	0	0	0	0	0	0	0	0	0	0
Meta-Protein 999	BLAST_MTRH_METTH Tetrahydromethanopterin S-methyltransferase subunit H OS=Methanothermobacter thermautotrophicus (strain ATCC 29096 / DSM 1053 / JCM 10044 / NBRC 100330 / Delta H) GN=mtrH PE=3 SV=1_O27224	Complete proteome;Methanogenesis;Methyltransferase;One-carbon metabolism;Reference proteome;Transferase;	;2.1.1.86;;	2.1.1.86;	;K00584;;	K00584;	UniRef50_P80187	UniRef90_P80187	UniRef100_O27224	Archaea	Methanothermobacter thermautotrophicus str. Delta H	unknown	Methanobacteria	Methanobacteriales	Methanobacteriaceae	Methanothermobacter	Methanothermobacter thermautotrophicus	Methanothermobacter thermautotrophicus str. Delta H	1	0	0	0	1	0	0	0	0	0	0	0	0	0	0	0	0	0	0	0	0	0	0	0	0	0	0	0	0	0	0
Meta-Protein 2240	BLAST_FABF_BACSU 3-oxoacyl-[acyl-carrier-protein] synthase 2 OS=Bacillus subtilis (strain 168) GN=fabF PE=1 SV=1_O34340	3D-structure;Acyltransferase;Complete proteome;Fatty acid biosynthesis;Fatty acid metabolism;Lipid biosynthesis;Lipid metabolism;Reference proteome;Transferase;	;2.3.1.179;;	2.3.1.179;	;K09458;;	K09458;	UniRef50_O34340	UniRef90_O34340	UniRef100_O34340	Bacteria	Bacillus subtilis subsp. subtilis str. 168	unknown	Bacilli	Bacillales	Bacillaceae	Bacillus	Bacillus subtilis subsp. subtilis str. 168	Bacillus subtilis subsp. subtilis	2	0	0	0	0	0	0	0	0	0	0	0	0	0	0	0	0	0	0	0	0	0	0	0	2	0	0	0	0	0	0
Meta-Protein 4281	BLAST_YDFG_DICNO Probable NADP-dependent dehydrogenase in aabA 3region (Fragment) OS=Dichelobacter nodosus PE=3 SV=1_P39884	NADP;Oxidoreductase;	;1.1.1.-;;	1.1.1.-;	;;;	;	UniRef50_P39884	UniRef90_P39884	UniRef100_P39884	Bacteria	Dichelobacter nodosus	unknown	Gammaproteobacteria	Cardiobacteriales	Cardiobacteriaceae	Dichelobacter	Dichelobacter nodosus	Dichelobacter nodosus	1	0	0	0	0	0	0	0	0	0	0	0	1	0	0	0	0	0	0	0	0	0	0	0	0	0	0	0	0	0	0
Meta-Protein 3819	BLAST_SUSC_BACTN TonB-dependent receptor SusC OS=Bacteroides thetaiotaomicron (strain ATCC 29148 / DSM 2079 / NCTC 10582 / E50 / VPI-5482) GN=susC PE=1 SV=1_Q8A1G1	Carbohydrate metabolism;Cell outer membrane;Complete proteome;Membrane;Receptor;Reference proteome;Signal;TonB box;Transmembrane;Transmembrane beta strand;Transport;	;;;	;	;K21573;;	K21573;	UniRef50_Q8A1G1	UniRef90_Q8A1G1	UniRef100_Q8A1G1	Bacteria	Bacteroides thetaiotaomicron VPI-5482	unknown	Bacteroidia	Bacteroidales	Bacteroidaceae	Bacteroides	Bacteroides thetaiotaomicron	Bacteroides thetaiotaomicron VPI-5482	14	0	0	0	0	2	0	2	2	4	0	0	0	0	0	0	2	1	1	0	0	0	0	0	0	0	0	0	0	0	0
Meta-Protein 1138	Metagenome unknown		;;		;;					Uncategorized	Uncategorized	unknown	Uncategorized	Uncategorized	Uncategorized	Uncategorized	Uncategorized	Uncategorized	5	0	0	0	0	0	0	2	2	1	0	0	0	0	0	0	0	0	0	0	0	0	0	0	0	0	0	0	0	0	0
Meta-Protein 1386	MYL3_PONAB Myosin light chain 3 OS=Pongo abelii GN=MYL3 PE=2 SV=3	3D-structure;Acetylation;Alternative splicing;Cardiomyopathy;Complete proteome;Direct protein sequencing;Disease mutation;Methylation;Motor protein;Muscle protein;Myosin;Phosphoprotein;Polymorphism;Reference proteome;Repeat;	;;;	;	;;K05738;K12749;K12751;;	;K05738;K12749;K12751;	UniRef50_P60660	UniRef90_P60660	EMPTY	Eukaryota	Metazoa	unknown	Euteleostomi	Euteleostomi	Euteleostomi	Euteleostomi	Euteleostomi	Euteleostomi	47	0	0	0	0	0	0	0	0	0	0	0	0	0	0	0	0	0	0	3	1	0	2	2	0	13	5	13	0	0	0
Meta-Protein 2901	BLAST_ACSE_MOOTH 5-methyltetrahydrofolate:corrinoid/iron-sulfur protein co-methyltransferase OS=Moorella thermoacetica GN=acsE PE=1 SV=2_Q46389	3D-structure;Calcium;Carbon dioxide fixation;Cobalamin;Cobalt;Metal-binding;Methyltransferase;Transferase;	;2.1.1.258;;	2.1.1.258;	;;;	;	UniRef50_Q46389	UniRef90_Q46389	UniRef100_Q46389	Bacteria	Moorella thermoacetica	unknown	Clostridia	Thermoanaerobacterales	Thermoanaerobacteraceae	Moorella	Moorella thermoacetica	Moorella thermoacetica	3	2	1	0	0	0	0	0	0	0	0	0	0	0	0	0	0	0	0	0	0	0	0	0	0	0	0	0	0	0	0
Meta-Protein 1310	Metagenome unknown		;;		;;					Uncategorized	Uncategorized	unknown	Uncategorized	Uncategorized	Uncategorized	Uncategorized	Uncategorized	Uncategorized	1	0	0	0	0	0	0	0	0	0	0	0	1	0	0	0	0	0	0	0	0	0	0	0	0	0	0	0	0	0	0
Meta-Protein 2139	Metagenome Unknown		;;		;;					Uncategorized	Uncategorized	unknown	Uncategorized	Uncategorized	Uncategorized	Uncategorized	Uncategorized	Uncategorized	1	0	0	0	0	0	0	0	0	0	0	0	0	0	0	0	0	0	0	0	0	0	1	0	0	0	0	0	0	0	0
Meta-Protein 3839	KLD7A_MOUSE Kelch domain-containing protein 7A OS=Mus musculus GN=Klhdc7a PE=1 SV=3	Complete proteome;Glycoprotein;Kelch repeat;Membrane;Phosphoprotein;Reference proteome;Repeat;Transmembrane;Transmembrane helix;	;;;	;	;;;	;	UniRef50_Q5VTJ3	UniRef90_A2APT9	UniRef100_A2APT9	Eukaryota	Metazoa	unknown	Mammalia	Rodentia	Muridae	Mus	Mus musculus	Mus musculus	1	0	0	0	0	1	0	0	0	0	0	0	0	0	0	0	0	0	0	0	0	0	0	0	0	0	0	0	0	0	0
Meta-Protein 2508	BLAST_RL28_BACV8 50S ribosomal protein L28 OS=Bacteroides vulgatus (strain ATCC 8482 / DSM 1447 / JCM 5826 / NBRC 14291 / NCTC 11154) GN=rpmB PE=3 SV=1_A6L5E4	Complete proteome;Reference proteome;Ribonucleoprotein;Ribosomal protein;	;;;	;	;K02902;;	K02902;	UniRef50_Q8A999	UniRef90_A6L5E4	UniRef100_A6L5E4	Bacteria	Bacteroides vulgatus ATCC 8482	unknown	Bacteroidia	Bacteroidales	Bacteroidaceae	Bacteroides	Bacteroides vulgatus	Bacteroides vulgatus ATCC 8482	1	0	0	0	0	0	0	0	0	0	0	0	0	0	0	0	0	0	0	0	0	0	0	0	0	0	0	1	0	0	0
Meta-Protein 3426	BLAST_ASPG_MYCLE Probable L-asparaginase OS=Mycobacterium leprae (strain TN) GN=ansA PE=3 SV=1_Q9X7E6	Complete proteome;Cytoplasm;Hydrolase;Reference proteome;	;3.5.1.1;;	3.5.1.1;	;K01424;;	K01424;	UniRef50_Q9X7E6	UniRef90_Q9X7E6	UniRef100_Q9X7E6	Bacteria	Mycobacterium leprae TN	unknown	Actinobacteria	Actinomycetales	Mycobacteriaceae	Mycobacterium	Mycobacterium leprae	Mycobacterium leprae TN	1	0	1	0	0	0	0	0	0	0	0	0	0	0	0	0	0	0	0	0	0	0	0	0	0	0	0	0	0	0	0
Meta-Protein 3762	RNH2_PYRAE Ribonuclease HII OS=Pyrobaculum aerophilum (strain ATCC 51768 / IM2 / DSM 7523 / JCM 9630 / NBRC 100827) GN=rnhB PE=3 SV=1	Complete proteome;Cytoplasm;Endonuclease;Hydrolase;Manganese;Metal-binding;Nuclease;Reference proteome;	;3.1.26.4;;	3.1.26.4;	;K03470;;	K03470;	UniRef50_Q8ZXL6	UniRef90_Q8ZXL6	UniRef100_Q8ZXL6	Archaea	Pyrobaculum aerophilum str. IM2	unknown	Thermoprotei	Thermoproteales	Thermoproteaceae	Pyrobaculum	Pyrobaculum aerophilum	Pyrobaculum aerophilum str. IM2	1	0	0	0	1	0	0	0	0	0	0	0	0	0	0	0	0	0	0	0	0	0	0	0	0	0	0	0	0	0	0
Meta-Protein 382	BLAST_NAGB_STRTD Glucosamine-6-phosphate deaminase OS=Streptococcus thermophilus (strain ATCC BAA-491 / LMD-9) GN=nagB PE=3 SV=1_Q03LS1	Carbohydrate metabolism;Complete proteome;Hydrolase;Reference proteome;	;3.5.99.6;;	3.5.99.6;	;K02564;;	K02564;	EMPTY	EMPTY	EMPTY	Bacteria	Firmicutes	unknown	Firmicutes	Firmicutes	Firmicutes	Firmicutes	Firmicutes	Firmicutes	6	2	1	2	0	0	0	1	0	0	0	0	0	0	0	0	0	0	0	0	0	0	0	0	0	0	0	0	0	0	0
Meta-Protein 618	BLAST_THSB_METTH Thermosome subunit beta OS=Methanothermobacter thermautotrophicus (strain ATCC 29096 / DSM 1053 / JCM 10044 / NBRC 100330 / Delta H) GN=thsB PE=3 SV=1_O26885	ATP-binding;Chaperone;Complete proteome;Nucleotide-binding;Reference proteome;	;;;	;	;;;	;	UniRef50_Q52500	UniRef90_O26885	UniRef100_O26885	Archaea	Methanothermobacter thermautotrophicus str. Delta H	unknown	Methanobacteria	Methanobacteriales	Methanobacteriaceae	Methanothermobacter	Methanothermobacter thermautotrophicus	Methanothermobacter thermautotrophicus str. Delta H	3	2	0	0	0	0	0	0	0	0	1	0	0	0	0	0	0	0	0	0	0	0	0	0	0	0	0	0	0	0	0
Meta-Protein 4118	Metagenome unknown		;;		;;					Uncategorized	Uncategorized	unknown	Uncategorized	Uncategorized	Uncategorized	Uncategorized	Uncategorized	Uncategorized	1	0	0	0	0	0	0	0	0	0	0	0	0	0	0	1	0	0	0	0	0	0	0	0	0	0	0	0	0	0	0
Meta-Protein 1889	BLAST_PUR5_THEGJ Phosphoribosylformylglycinamidine cyclo-ligase OS=Thermococcus gammatolerans (strain DSM 15229 / JCM 11827 / EJ3) GN=purM PE=3 SV=1_C5A4H7	ATP-binding;Complete proteome;Cytoplasm;Ligase;Nucleotide-binding;Purine biosynthesis;Reference proteome;	;6.3.3.1;;	6.3.3.1;	;K01933;;	K01933;	EMPTY	EMPTY	UniRef100_Q833Z1	cellular organisms	cellular organisms	unknown	cellular organisms	cellular organisms	cellular organisms	cellular organisms	cellular organisms	cellular organisms	1	0	0	0	0	0	0	0	0	0	0	0	0	0	0	0	0	0	0	0	0	1	0	0	0	0	0	0	0	0	0
Meta-Protein 2195	BLAST_E13B_BACCI Glucan endo-1,3-beta-glucosidase A1 OS=Bacillus circulans GN=glcA PE=1 SV=1_P23903	Cell wall biogenesis/degradation;Direct protein sequencing;Glycosidase;Hydrolase;Secreted;Signal;	;3.2.1.39;;	3.2.1.39;	;;;	;	UniRef50_P23903	UniRef90_P23903	UniRef100_P23903	Bacteria	Bacillus circulans	unknown	Bacilli	Bacillales	Bacillaceae	Bacillus	Bacillus circulans	Bacillus circulans	1	0	0	0	0	0	0	0	0	0	0	0	0	0	0	0	0	0	0	0	0	0	0	1	0	0	0	0	0	0	0
Meta-Protein 1921	BLAST_SYD_BACTN Aspartate--tRNA ligase OS=Bacteroides thetaiotaomicron (strain ATCC 29148 / DSM 2079 / NCTC 10582 / E50 / VPI-5482) GN=aspS PE=3 SV=1_Q8A9E3	ATP-binding;Aminoacyl-tRNA synthetase;Complete proteome;Cytoplasm;Ligase;Nucleotide-binding;Protein biosynthesis;Reference proteome;	;6.1.1.12;;	6.1.1.12;	;K01876;;	K01876;	UniRef50_O32038	UniRef90_A6LBU6	UniRef100_A6LBU6	Bacteria	Bacteroidales	unknown	Bacteroidia	Bacteroidales	Bacteroidales	Bacteroidales	Bacteroidales	Bacteroidales	6	0	0	0	0	0	0	0	0	0	0	0	0	0	0	0	0	0	0	0	0	2	2	1	1	0	0	0	0	0	0
Meta-Protein 3107	BLAST_DGTL1_CALS4 Deoxyguanosinetriphosphate triphosphohydrolase-like protein OS=Caldanaerobacter subterraneus subsp. tengcongensis (strain DSM 15242 / JCM 11007 / NBRC 100824 / MB4) GN=TTE1757 PE=3 SV=1_Q8R5R4	Complete proteome;Hydrolase;Reference proteome;	;;;	;	;K01129;;	K01129;	UniRef50_Q8R5R4	UniRef90_Q8R5R4	UniRef100_Q8R5R4	Bacteria	Thermoanaerobacter tengcongensis MB4	unknown	Clostridia	Thermoanaerobacterales	Thermoanaerobacteraceae	Caldanaerobacter	Thermoanaerobacter tengcongensis MB4	Caldanaerobacter subterraneus subsp. tengcongensis	3	1	1	1	0	0	0	0	0	0	0	0	0	0	0	0	0	0	0	0	0	0	0	0	0	0	0	0	0	0	0
Meta-Protein 3404	BLAST_XG74_PAESP Xyloglucanase OS=Paenibacillus sp. GN=xeg74 PE=1 SV=1_Q3MUH7	Carbohydrate metabolism;Cellulose degradation;Direct protein sequencing;Glycosidase;Hydrolase;Polysaccharide degradation;Repeat;Signal;	;3.2.1.-;;	3.2.1.-;	;;;	;	UniRef50_Q3MUH7	UniRef90_Q3MUH7	UniRef100_Q3MUH7	Bacteria	Paenibacillus sp.	unknown	Bacilli	Bacillales	Paenibacillaceae	Paenibacillus	Paenibacillus sp.	Paenibacillus sp.	1	0	1	0	0	0	0	0	0	0	0	0	0	0	0	0	0	0	0	0	0	0	0	0	0	0	0	0	0	0	0
Meta-Protein 4236	BLAST_MALT_SALDC HTH-type transcriptional regulator MalT OS=Salmonella dublin (strain CT_02021853) GN=malT PE=3 SV=1_B5FKD6	ATP-binding;Activator;Carbohydrate metabolism;Complete proteome;DNA-binding;Nucleotide-binding;Reference proteome;Transcription;Transcription regulation;	;;;	;	;K03556;;	K03556;	UniRef50_Q8ZLI3	UniRef90_Q8ZLI3	EMPTY	Bacteria	Salmonella enterica subsp. enterica	unknown	Gammaproteobacteria	Enterobacteriales	Enterobacteriaceae	Salmonella	Salmonella enterica	Salmonella enterica subsp. enterica	1	0	0	0	0	0	0	0	0	0	1	0	0	0	0	0	0	0	0	0	0	0	0	0	0	0	0	0	0	0	0
Meta-Protein 3508	BLAST_POTD_SALTI Spermidine/putrescine-binding periplasmic protein OS=Salmonella typhi GN=potD PE=3 SV=1_P0A2C8	Complete proteome;Periplasm;Reference proteome;Signal;Transport;	;;;	;	;K11069;;	K11069;	UniRef50_P0AFK9	UniRef90_P0AFK9	UniRef100_P0A2C8	Bacteria	Salmonella enterica subsp. enterica	unknown	Gammaproteobacteria	Enterobacteriales	Enterobacteriaceae	Salmonella	Salmonella enterica	Salmonella enterica subsp. enterica	1	0	0	1	0	0	0	0	0	0	0	0	0	0	0	0	0	0	0	0	0	0	0	0	0	0	0	0	0	0	0
Meta-Protein 3519	BLAST_GSID_ECOLI Glutathione transport system permease protein GsiD OS=Escherichia coli (strain K12) GN=gsiD PE=1 SV=1_P75799	Cell inner membrane;Cell membrane;Complete proteome;Membrane;Reference proteome;Transmembrane;Transmembrane helix;Transport;	;;;	;	;;K13891;;	;K13891;	UniRef50_P75799	UniRef90_P75799	EMPTY	Bacteria	Enterobacteriaceae	unknown	Gammaproteobacteria	Enterobacteriales	Enterobacteriaceae	Enterobacteriaceae	Enterobacteriaceae	Enterobacteriaceae	1	0	0	1	0	0	0	0	0	0	0	0	0	0	0	0	0	0	0	0	0	0	0	0	0	0	0	0	0	0	0
Meta-Protein 2561	BLAST_RS13_BACV8 30S ribosomal protein S13 OS=Bacteroides vulgatus (strain ATCC 8482 / DSM 1447 / JCM 5826 / NBRC 14291 / NCTC 11154) GN=rpsM PE=3 SV=1_A6KYH3	Complete proteome;RNA-binding;Reference proteome;Ribonucleoprotein;Ribosomal protein;rRNA-binding;tRNA-binding;	;;;	;	;K02952;;	K02952;	UniRef50_Q8A499	UniRef90_Q8A499	EMPTY	Bacteria	Bacteroides	unknown	Bacteroidia	Bacteroidales	Bacteroidaceae	Bacteroides	Bacteroides	Bacteroides	2	0	0	0	0	0	0	0	0	0	0	0	0	0	0	0	0	0	0	0	0	0	0	0	0	0	0	0	0	0	0
Meta-Protein 1129	BLAST_ALF_BACSU Probable fructose-bisphosphate aldolase OS=Bacillus subtilis (strain 168) GN=fbaA PE=1 SV=2_P13243	Complete proteome;Direct protein sequencing;Glycolysis;Lyase;Metal-binding;Phosphoprotein;Reference proteome;Sporulation;Zinc;	;4.1.2.13;;	4.1.2.13;	;;K01624;;	;K01624;	UniRef50_Q5XA12	UniRef90_P94453	UniRef100_P94453	Bacteria	Bacteria	unknown	Bacteria	Bacteria	Bacteria	Bacteria	Bacteria	Bacteria	1	0	0	0	0	0	0	1	0	0	0	0	0	0	0	0	0	0	0	0	0	0	0	0	0	0	0	0	0	0	0
Meta-Protein 3012	BLAST_OPPB_BACSU Oligopeptide transport system permease protein OppB OS=Bacillus subtilis (strain 168) GN=oppB PE=2 SV=2_P24138	Cell membrane;Competence;Complete proteome;Membrane;Peptide transport;Protein transport;Reference proteome;Sporulation;Transmembrane;Transmembrane helix;Transport;	;;;	;	;K15581;;	K15581;	UniRef50_P24138	UniRef90_P24138	UniRef100_P24138	Bacteria	Bacillus subtilis subsp. subtilis str. 168	unknown	Bacilli	Bacillales	Bacillaceae	Bacillus	Bacillus subtilis subsp. subtilis str. 168	Bacillus subtilis subsp. subtilis	11	3	3	2	0	0	0	1	1	1	0	0	0	0	0	0	0	0	0	0	0	0	0	0	0	0	0	0	0	0	0
Meta-Protein 1003	BLAST_MTTC1_METAC Trimethylamine corrinoid protein 1 OS=Methanosarcina acetivorans (strain ATCC 35395 / DSM 2834 / JCM 12185 / C2A) GN=mttC1 PE=3 SV=1_Q8TTA8	Cobalt;Complete proteome;Metal-binding;Methanogenesis;Reference proteome;Repeat;	;;;	;	;K14084;;	K14084;	UniRef50_O93659	EMPTY	EMPTY	Archaea	Methanosarcina	unknown	Methanomicrobia	Methanosarcinales	Methanosarcinaceae	Methanosarcina	Methanosarcina	Methanosarcina	5	0	0	0	3	2	0	0	0	0	0	0	0	0	0	0	0	0	0	0	0	0	0	0	0	0	0	0	0	0	0
Meta-Protein 546	BLAST_FAE_METBF 5,6,7,8-tetrahydromethanopterin hydro-lyase OS=Methanosarcina barkeri (strain Fusaro / DSM 804) GN=faeA PE=1 SV=1_Q46AU8	Complete proteome;Cytoplasm;Lyase;Reference proteome;	;4.2.1.147;;	4.2.1.147;	;K10713;;	K10713;	UniRef50_Q9FA38	UniRef90_Q46AU8	UniRef100_Q46AU8	Archaea	Methanosarcina barkeri str. Fusaro	unknown	Methanomicrobia	Methanosarcinales	Methanosarcinaceae	Methanosarcina	Methanosarcina barkeri	Methanosarcina barkeri str. Fusaro	39	3	4	5	2	2	2	6	2	4	2	3	2	0	0	0	0	1	1	0	0	0	0	0	0	0	0	0	0	0	0
Meta-Protein 4319	Metagenome Unknown		;;		;;					Uncategorized	Uncategorized	unknown	Uncategorized	Uncategorized	Uncategorized	Uncategorized	Uncategorized	Uncategorized	30	0	0	0	0	0	0	0	0	0	0	0	0	0	0	0	0	0	0	2	4	0	0	0	4	3	3	1	0	3	0
Meta-Protein 2369	HV349_HUMAN Immunoglobulin heavy variable 3-49 OS=Homo sapiens GN=IGHV3-49 PE=3 SV=1	Adaptive immunity;Cell membrane;Complete proteome;Disulfide bond;Immunity;Immunoglobulin V region;Immunoglobulin domain;Membrane;Polymorphism;Reference proteome;Secreted;Signal;	;;;	;	;;;	;	UniRef50_A0A0A0MS15	UniRef90_A0A0A0MS15	UniRef100_A0A0A0MS15	Eukaryota	Metazoa	unknown	Mammalia	Primates	Hominidae	Homo	Homo sapiens	Homo sapiens	6	0	0	0	0	0	0	0	0	0	0	0	0	0	0	0	0	0	0	0	0	0	0	0	0	1	2	1	0	0	0
Meta-Protein 4829	Metagenome Unknown		;;		;;					Uncategorized	Uncategorized	unknown	Uncategorized	Uncategorized	Uncategorized	Uncategorized	Uncategorized	Uncategorized	1	0	0	0	0	0	0	0	0	0	0	0	0	0	0	0	0	0	0	0	0	0	0	0	0	1	0	0	0	0	0
Meta-Protein 2166	BLAST_RL17_BACV8 50S ribosomal protein L17 OS=Bacteroides vulgatus (strain ATCC 8482 / DSM 1447 / JCM 5826 / NBRC 14291 / NCTC 11154) GN=rplQ PE=3 SV=1_A6KYG9	Complete proteome;Reference proteome;Ribonucleoprotein;Ribosomal protein;	;;;	;	;K02879;;	K02879;	UniRef50_A6KYG9	UniRef90_A6KYG9	UniRef100_A6KYG9	Bacteria	Bacteroides vulgatus ATCC 8482	unknown	Bacteroidia	Bacteroidales	Bacteroidaceae	Bacteroides	Bacteroides vulgatus	Bacteroides vulgatus ATCC 8482	3	0	0	0	0	0	0	0	0	0	0	0	0	0	0	0	0	0	0	0	0	0	3	0	0	0	0	0	0	0	0
Meta-Protein 4715	BLAST_PLYB_ASPTN Probable pectate lyase B OS=Aspergillus terreus (strain NIH 2624 / FGSC A1156) GN=plyB PE=3 SV=1_Q0CBV0	Calcium;Carbohydrate metabolism;Cell wall biogenesis/degradation;Complete proteome;Lyase;Metal-binding;Polysaccharide degradation;Reference proteome;Secreted;Signal;	;4.2.2.2;;	4.2.2.2;	;;;	;	UniRef50_Q00645	UniRef90_Q0CBV0	UniRef100_Q0CBV0	Eukaryota	Fungi	unknown	Eurotiomycetes	Eurotiales	Trichocomaceae	Aspergillus	Aspergillus terreus	Aspergillus terreus NIH2624	1	0	0	0	0	0	0	0	0	0	0	0	0	0	0	0	0	0	0	0	0	0	1	0	0	0	0	0	0	0	0
Meta-Protein 2073	BLAST_Y572_TREPA Uncharacterized protein TP_0572 OS=Treponema pallidum (strain Nichols) GN=TP_0572 PE=4 SV=1_O83582	3D-structure;Cell membrane;Complete proteome;Direct protein sequencing;Electron transport;FAD;Flavoprotein;Heme;Iron;Lipid degradation;Lipid metabolism;Membrane;Metal-binding;Oxidoreductase;Periplasm;Reference proteome;Signal;Steroid metabolism;Transmembrane;Transmembrane helix;Transport;	;;1.3.5.4;1.3.99.-;;	;1.3.5.4;1.3.99.-;	;;K00244;K07077;;	;K00244;K07077;	UniRef50_O83582	UniRef90_O83582	UniRef100_O83582	Bacteria	Bacteria	unknown	Bacteria	Bacteria	Bacteria	Bacteria	Bacteria	Bacteria	2	0	0	0	0	0	0	0	0	0	0	0	0	0	0	0	0	0	0	0	0	0	1	0	0	0	0	0	0	0	0
Meta-Protein 418	BLAST_SUSD_BACTN Starch-binding protein SusD OS=Bacteroides thetaiotaomicron (strain ATCC 29148 / DSM 2079 / NCTC 10582 / E50 / VPI-5482) GN=susD PE=1 SV=1_Q8A1G2	3D-structure;Calcium;Carbohydrate metabolism;Cell outer membrane;Complete proteome;Lipoprotein;Membrane;Metal-binding;Palmitate;Reference proteome;Signal;	;;;	;	;;K21572;;	;K21572;	UniRef50_A7LXT5	UniRef90_A7LXT5	UniRef100_A7LXT5	Bacteria	Bacteroides	unknown	Bacteroidia	Bacteroidales	Bacteroidaceae	Bacteroides	Bacteroides	Bacteroides	76	12	12	11	6	7	7	4	6	6	3	1	1	0	0	0	0	0	0	0	0	0	0	0	0	0	0	0	0	0	0
Meta-Protein 2753	Metagenome unknown		;;		;;					Uncategorized	Uncategorized	unknown	Uncategorized	Uncategorized	Uncategorized	Uncategorized	Uncategorized	Uncategorized	1	1	0	0	0	0	0	0	0	0	0	0	0	0	0	0	0	0	0	0	0	0	0	0	0	0	0	0	0	0	0
Meta-Protein 3881	Metagenome unknown		;;		;;					Uncategorized	Uncategorized	unknown	Uncategorized	Uncategorized	Uncategorized	Uncategorized	Uncategorized	Uncategorized	1	0	0	0	0	0	1	0	0	0	0	0	0	0	0	0	0	0	0	0	0	0	0	0	0	0	0	0	0	0	0
Meta-Protein 2197	BLAST_RL17_EUBE2 50S ribosomal protein L17 OS=Eubacterium eligens (strain ATCC 27750 / VPI C15-48) GN=rplQ PE=3 SV=1_C4Z2V8	Complete proteome;Reference proteome;Ribonucleoprotein;Ribosomal protein;	;;;	;	;K02879;;	K02879;	UniRef50_C4Z2V8	UniRef90_C4Z2V8	UniRef100_C4Z2V8	Bacteria	Bacteria	unknown	Bacteria	Bacteria	Bacteria	Bacteria	Bacteria	Bacteria	5	0	0	0	0	0	0	0	0	0	0	0	0	0	0	0	0	0	0	0	0	0	0	1	0	3	1	0	0	0	0
Meta-Protein 4818	BLAST_ETFA_CLOPR Acryloyl-CoA reductase electron transfer subunit beta OS=Clostridium propionicum GN=acrA PE=1 SV=1_G3KIM6	Cytoplasm;Electron transport;Transport;	;;;	;	;;;	;	UniRef50_G3KIM6	UniRef90_G3KIM6	UniRef100_G3KIM6	Bacteria	Clostridium propionicum	unknown	Clostridia	Clostridiales	Clostridiaceae	Clostridium	Clostridium propionicum	Clostridium propionicum	1	0	0	0	0	0	0	0	0	0	0	0	0	0	0	0	0	0	0	0	0	0	0	0	0	1	0	0	0	0	0
Meta-Protein 299	BLAST_Y0430_BRAHW Putative ABC transporter periplasmic binding protein BHWA1_00430 OS=Brachyspira hyodysenteriae (strain ATCC 49526 / WA1) GN=ssuA PE=1 SV=1_C0QY54	Cell membrane;Complete proteome;Lipoprotein;Membrane;Palmitate;Reference proteome;Signal;	;;;	;	;K02051;;	K02051;	UniRef50_C0QY54	UniRef90_C0QY54	UniRef100_C0QY54	Bacteria	Brachyspira hyodysenteriae WA1	unknown	Spirochaetia	Spirochaetales	Brachyspiraceae	Brachyspira	Brachyspira hyodysenteriae	Brachyspira hyodysenteriae WA1	30	6	4	3	4	5	4	2	0	1	1	0	0	0	0	0	0	0	0	0	0	0	0	0	0	0	0	0	0	0	0
Meta-Protein 3553	Metagenome unknown		;;		;;					Uncategorized	Uncategorized	unknown	Uncategorized	Uncategorized	Uncategorized	Uncategorized	Uncategorized	Uncategorized	1	0	0	0	1	0	0	0	0	0	0	0	0	0	0	0	0	0	0	0	0	0	0	0	0	0	0	0	0	0	0
Meta-Protein 2443	RL19_CLOTE 50S ribosomal protein L19 OS=Clostridium tetani (strain Massachusetts / E88) GN=rplS PE=3 SV=2	Complete proteome;Reference proteome;Ribonucleoprotein;Ribosomal protein;	;;;	;	;K02884;;	K02884;	UniRef50_A1R7G2	EMPTY	EMPTY	Bacteria	Clostridiales	unknown	Clostridia	Clostridiales	Clostridiales	Clostridiales	Clostridiales	Clostridiales	4	0	0	0	0	0	0	0	0	0	0	0	0	0	0	0	0	0	0	0	0	0	0	0	0	2	0	0	0	0	0
Meta-Protein 3225	Metagenome unknown		;;		;;					Uncategorized	Uncategorized	unknown	Uncategorized	Uncategorized	Uncategorized	Uncategorized	Uncategorized	Uncategorized	5	1	2	1	0	0	0	0	0	0	1	0	0	0	0	0	0	0	0	0	0	0	0	0	0	0	0	0	0	0	0
Meta-Protein 770	BLAST_LACK_RHIRD Lactose transport ATP-binding protein LacK OS=Rhizobium radiobacter GN=lacK PE=3 SV=1_Q01937	3D-structure;ATP-binding;Cell inner membrane;Cell membrane;Complete proteome;Hydrolase;Magnesium;Membrane;Metal-binding;Nucleotide-binding;Polysaccharide transport;Reference proteome;Sugar transport;Sulfate transport;Transport;	;;3.6.3.-;3.6.3.19;3.6.3.20;3.6.3.25;3.6.3.31;;	;3.6.3.-;3.6.3.19;3.6.3.20;3.6.3.25;3.6.3.31;	;;K02045;K05816;K10112;K11072;;	;K02045;K05816;K10112;K11072;	EMPTY	EMPTY	UniRef100_P74548	cellular organisms	cellular organisms	unknown	cellular organisms	cellular organisms	cellular organisms	cellular organisms	cellular organisms	cellular organisms	54	3	5	5	4	1	2	1	3	1	5	4	4	0	0	0	0	0	0	2	2	0	1	3	0	3	2	3	0	0	0
Meta-Protein 2105	BLAST_DGAL_SALTY D-galactose-binding periplasmic protein OS=Salmonella typhimurium (strain LT2 / SGSC1412 / ATCC 700720) GN=mglB PE=1 SV=2_P23905	3D-structure;Calcium;Chemotaxis;Complete proteome;Metal-binding;Periplasm;Reference proteome;Signal;Sugar transport;Transport;	;;;	;	;K10540;;	K10540;	UniRef50_P23905	UniRef90_P23905	UniRef100_P23905	Bacteria	Salmonella enterica subsp. enterica serovar Typhimurium str. LT2	unknown	Gammaproteobacteria	Enterobacteriales	Enterobacteriaceae	Salmonella	Salmonella enterica subsp. enterica serovar Typhimurium str. LT2	Salmonella enterica subsp. enterica	2	0	0	0	0	0	0	0	0	0	0	0	0	0	0	0	0	0	0	0	0	0	2	0	0	0	0	0	0	0	0
Meta-Protein 955	BLAST_XYNA_CLOSA Endo-1,4-beta-xylanase OS=Clostridium saccharobutylicum GN=xynB PE=3 SV=1_P17137	Carbohydrate metabolism;Direct protein sequencing;Glycosidase;Hydrolase;Multifunctional enzyme;Polysaccharide degradation;Secreted;Signal;Xylan degradation;	;3.2.1.8;3.5.1.-;;	3.2.1.8;3.5.1.-;	;;;	;	EMPTY	EMPTY	EMPTY	Bacteria	Clostridiales	unknown	Clostridia	Clostridiales	Clostridiales	Clostridiales	Clostridiales	Clostridiales	24	0	0	0	1	1	6	7	6	2	0	0	0	0	0	0	1	0	0	0	0	0	0	0	0	0	0	0	0	0	0
Meta-Protein 389	PSBB_SACOF Photosystem II CP47 reaction center protein OS=Saccharum officinarum GN=psbB PE=3 SV=1	3D-structure;Chlorophyll;Chloroplast;Chromophore;Complete proteome;Cyanelle;Direct protein sequencing;Magnesium;Membrane;Metal-binding;Photosynthesis;Photosystem II;Plastid;RNA editing;Reference proteome;Thylakoid;Transmembrane;Transmembrane helix;	;;;	;	;;K02704;;	;K02704;	UniRef50_Q8DIQ1	UniRef90_Q8DIQ1	EMPTY	cellular organisms	cellular organisms	unknown	cellular organisms	cellular organisms	cellular organisms	cellular organisms	cellular organisms	cellular organisms	237	15	13	10	33	26	34	30	31	27	1	0	1	2	2	0	4	4	4	0	0	0	0	0	0	0	0	0	0	0	0
Meta-Protein 1161	HMGCL_HUMAN Hydroxymethylglutaryl-CoA lyase, mitochondrial OS=Homo sapiens GN=HMGCL PE=1 SV=2	3D-structure;Acetylation;Alternative splicing;Complete proteome;Disease mutation;Disulfide bond;Lyase;Metal-binding;Mitochondrion;Peroxisome;Reference proteome;Transit peptide;	;4.1.3.4;;	4.1.3.4;	;K01640;;	K01640;	UniRef50_P35914	UniRef90_P35914	UniRef100_Q5R9E1	Eukaryota	Metazoa	unknown	Mammalia	Primates	Catarrhini	Catarrhini	Catarrhini	Catarrhini	1	0	0	0	0	0	0	0	1	0	0	0	0	0	0	0	0	0	0	0	0	0	0	0	0	0	0	0	0	0	0
Meta-Protein 4270	BLAST_FRHG_METTH Coenzyme F420 hydrogenase subunit gamma OS=Methanothermobacter thermautotrophicus (strain ATCC 29096 / DSM 1053 / JCM 10044 / NBRC 100330 / Delta H) GN=frhG PE=1 SV=4_P19498	4Fe-4S;Complete proteome;Direct protein sequencing;Electron transport;Iron;Iron-sulfur;Metal-binding;Oxidoreductase;Reference proteome;Repeat;Transport;	;1.12.98.1;;	1.12.98.1;	;K00443;;	K00443;	UniRef50_P19498	UniRef90_P19498	UniRef100_P19498	Archaea	Methanothermobacter thermautotrophicus str. Delta H	unknown	Methanobacteria	Methanobacteriales	Methanobacteriaceae	Methanothermobacter	Methanothermobacter thermautotrophicus	Methanothermobacter thermautotrophicus str. Delta H	1	0	0	0	0	0	0	0	0	0	0	0	1	0	0	0	0	0	0	0	0	0	0	0	0	0	0	0	0	0	0
Meta-Protein 501	BLAST_LSRB_KLEP7 Autoinducer 2-binding protein LsrB OS=Klebsiella pneumoniae subsp. pneumoniae (strain ATCC 700721 / MGH 78578) GN=lsrB PE=3 SV=1_A6TEB5	Complete proteome;Periplasm;Reference proteome;Signal;	;;;	;	;K10555;;	K10555;	UniRef50_Q8ZKQ1	UniRef90_A6TEB5	UniRef100_A4WER1	Bacteria	Enterobacteriaceae	unknown	Gammaproteobacteria	Enterobacteriales	Enterobacteriaceae	Enterobacteriaceae	Enterobacteriaceae	Enterobacteriaceae	73	9	10	7	8	7	6	5	4	4	4	2	2	1	1	0	1	1	1	0	0	0	0	0	0	0	0	0	0	0	0
Meta-Protein 4762	Metagenome Unknown		;;		;;					Uncategorized	Uncategorized	unknown	Uncategorized	Uncategorized	Uncategorized	Uncategorized	Uncategorized	Uncategorized	2	0	0	0	0	0	0	0	0	0	0	0	0	0	0	0	0	0	0	0	0	0	0	0	2	0	0	0	0	0	0
Meta-Protein 4669	BLAST_REPR_STRAG Protein RepR OS=Streptococcus agalactiae GN=repR PE=4 SV=1_P18629	DNA replication;DNA-binding;Plasmid;	;;;	;	;;;	;	UniRef50_P14752	UniRef90_P14752	UniRef100_P18629	Bacteria	Streptococcus agalactiae	unknown	Bacilli	Lactobacillales	Streptococcaceae	Streptococcus	Streptococcus agalactiae	Streptococcus agalactiae	1	0	0	0	0	0	0	0	0	0	0	0	0	0	0	0	0	0	0	0	0	0	1	0	0	0	0	0	0	0	0
Meta-Protein 3924	BLAST_LSRB_ECOLI Autoinducer 2-binding protein LsrB OS=Escherichia coli (strain K12) GN=lsrB PE=1 SV=1_P76142	Complete proteome;Periplasm;Reference proteome;Signal;	;;;	;	;;K10555;;	;K10555;	EMPTY	EMPTY	EMPTY	Bacteria	Enterobacteriaceae	unknown	Gammaproteobacteria	Enterobacteriales	Enterobacteriaceae	Enterobacteriaceae	Enterobacteriaceae	Enterobacteriaceae	3	0	0	0	0	0	2	0	0	0	1	0	0	0	0	0	0	0	0	0	0	0	0	0	0	0	0	0	0	0	0
Meta-Protein 2699	BLAST_HPPA_ALLVI K(+)-insensitive pyrophosphate-energized proton pump (Fragment) OS=Allochromatium vinosum GN=hppA PE=3 SV=1_Q8VNU8	Calcium;Cell membrane;Complete proteome;Hydrogen ion transport;Hydrolase;Ion transport;Magnesium;Membrane;Metal-binding;Reference proteome;Transmembrane;Transmembrane helix;Transport;	;3.6.1.1;;	3.6.1.1;	;;K15987;;	;K15987;	UniRef50_Q8PYZ8	EMPTY	EMPTY	Bacteria	Proteobacteria	unknown	Proteobacteria	Proteobacteria	Proteobacteria	Proteobacteria	Proteobacteria	Proteobacteria	3	0	0	0	0	0	0	0	0	0	0	0	0	0	0	0	0	0	0	0	0	0	0	0	0	0	0	0	0	0	0
Meta-Protein 2824	Metagenome unknown		;;		;;					Uncategorized	Uncategorized	unknown	Uncategorized	Uncategorized	Uncategorized	Uncategorized	Uncategorized	Uncategorized	152	32	32	32	1	1	2	4	4	5	12	11	12	1	0	0	2	1	0	0	0	0	0	0	0	0	0	0	0	0	0
Meta-Protein 141	BLAST_TCSA_LISMO CD4+ T-cell-stimulating antigen OS=Listeria monocytogenes serovar 1/2a (strain ATCC BAA-679 / EGD-e) GN=tcsA PE=3 SV=2_Q48754	Cell membrane;Complete proteome;Lipoprotein;Membrane;Palmitate;Reference proteome;Signal;	;;;	;	;K07335;;	K07335;	UniRef50_O05252	UniRef90_Q48754	UniRef100_Q48754	Bacteria	Bacillales	unknown	Bacilli	Bacillales	Bacillales	Bacillales	Bacillales	Bacillales	162	18	19	17	12	10	6	9	7	6	22	17	14	0	0	1	0	3	1	0	0	0	0	0	0	0	0	0	0	0	0
Meta-Protein 4162	Metagenome unknown		;;		;;					Uncategorized	Uncategorized	unknown	Uncategorized	Uncategorized	Uncategorized	Uncategorized	Uncategorized	Uncategorized	1	0	0	0	0	0	0	0	0	0	1	0	0	0	0	0	0	0	0	0	0	0	0	0	0	0	0	0	0	0	0
Meta-Protein 5030	BLAST_GALNS_PIG N-acetylgalactosamine-6-sulfatase OS=Sus scrofa GN=GALNS PE=2 SV=1_Q8WNQ7	Calcium;Complete proteome;Disulfide bond;Glycoprotein;Hydrolase;Lysosome;Metal-binding;Reference proteome;Signal;	;3.1.6.4;;	3.1.6.4;	;K01132;;	K01132;	UniRef50_Q8WNQ7	UniRef90_Q8WNQ7	UniRef100_Q8WNQ7	Eukaryota	Metazoa	unknown	Mammalia	Sus scrofa	Suidae	Sus	Sus scrofa	Sus scrofa	1	0	0	0	0	0	0	0	0	0	0	0	0	0	0	0	0	0	0	0	0	0	0	0	0	0	0	0	0	0	0
Meta-Protein 76	BLAST_SYT_CLOTH Threonine--tRNA ligase OS=Clostridium thermocellum (strain ATCC 27405 / DSM 1237 / NBRC 103400 / NCIMB 10682 / NRRL B-4536 / VPI 7372) GN=thrS PE=3 SV=1_A3DET1	ATP-binding;Aminoacyl-tRNA synthetase;Complete proteome;Cytoplasm;Ligase;Metal-binding;Nucleotide-binding;Protein biosynthesis;RNA-binding;Reference proteome;Zinc;tRNA-binding;	;6.1.1.3;;	6.1.1.3;	;K01868;;	K01868;	UniRef50_Q189B8	UniRef90_A3DET1	EMPTY	Bacteria	Bacteria	unknown	Bacteria	Bacteria	Bacteria	Bacteria	Bacteria	Bacteria	11	1	2	2	2	1	0	1	1	1	0	0	0	0	0	0	0	0	0	0	0	0	0	0	0	0	0	0	0	0	0
Meta-Protein 1221	BLAST_TONB_HELPJ Protein TonB OS=Helicobacter pylori (strain J99 / ATCC 700824) GN=tonB PE=3 SV=1_Q9ZJP4	3D-structure;Carbohydrate metabolism;Cell inner membrane;Cell membrane;Cell outer membrane;Complete proteome;Membrane;Protein transport;Receptor;Reference proteome;Repeat;Signal;Signal-anchor;TonB box;Transmembrane;Transmembrane beta strand;Transmembrane helix;Transport;	;;;	;	;K03832;K21573;;	K03832;K21573;	UniRef50_Q51368	UniRef90_Q51368	EMPTY	Bacteria	Bacteria	unknown	Bacteria	Bacteria	Bacteria	Bacteria	Bacteria	Bacteria	2	0	0	0	0	0	0	0	0	0	1	0	1	0	0	0	0	0	0	0	0	0	0	0	0	0	0	0	0	0	0
Meta-Protein 366	BLAST_FADN_BACSU Probable 3-hydroxyacyl-CoA dehydrogenase OS=Bacillus subtilis (strain 168) GN=fadN PE=2 SV=2_O32178	Complete proteome;Fatty acid metabolism;Lipid degradation;Lipid metabolism;NAD;Oxidoreductase;Reference proteome;	;1.1.1.35;;	1.1.1.35;	;;;	;	UniRef50_O32178	UniRef90_O32178	UniRef100_O32178	Bacteria	Bacillus subtilis subsp. subtilis str. 168	unknown	Bacilli	Bacillales	Bacillaceae	Bacillus	Bacillus subtilis subsp. subtilis str. 168	Bacillus subtilis subsp. subtilis	28	7	6	6	0	0	0	0	0	0	4	2	3	0	0	0	0	0	0	0	0	0	0	0	0	0	0	0	0	0	0
Meta-Protein 1218	BLAST_SYFB_BACFR Phenylalanine--tRNA ligase beta subunit OS=Bacteroides fragilis (strain YCH46) GN=pheT PE=3 SV=1_Q64T65	3D-structure;ATP-binding;Aminoacyl-tRNA synthetase;Cell inner membrane;Cell membrane;Complete proteome;Cytoplasm;Helicase;Hydrolase;Ligase;Magnesium;Membrane;Metal-binding;Nucleotide-binding;Protein biosynthesis;RNA-binding;Reference proteome;Transmembrane;Transmembrane helix;Transport;tRNA-binding;	;;3.6.4.-;6.1.1.20;;	;3.6.4.-;6.1.1.20;	;;K01890;K01992;;	;K01890;K01992;	UniRef50_Q196V1	UniRef90_Q196V1	EMPTY	root	root	unknown	root	root	root	root	root	root	1	0	0	0	0	0	0	0	0	0	1	0	0	0	0	0	0	0	0	0	0	0	0	0	0	0	0	0	0	0	0
Meta-Protein 4321	BLAST_CDA_MYROD Calcium-transporting ATPase OS=Myroides odoratus GN=cda PE=1 SV=2_Q47910	ATP-binding;Calcium;Calcium transport;Cell inner membrane;Cell membrane;Direct protein sequencing;Hydrolase;Ion transport;Magnesium;Membrane;Metal-binding;Nucleotide-binding;Phosphoprotein;Signal;Transport;	;3.6.3.8;;	3.6.3.8;	;;;	;	UniRef50_Q47910	UniRef90_Q47910	UniRef100_Q47910	Bacteria	Myroides odoratus	unknown	Flavobacteriia	Flavobacteriales	Flavobacteriaceae	Myroides	Myroides odoratus	Myroides odoratus	4	0	0	0	0	0	0	0	0	0	0	0	0	0	0	0	0	0	0	1	0	0	0	0	3	0	0	0	0	0	0
Meta-Protein 1674	BLAST_G3P_STREQ Glyceraldehyde-3-phosphate dehydrogenase OS=Streptococcus dysgalactiae subsp. equisimilis GN=gap PE=1 SV=2_Q59906	Complete proteome;Cytoplasm;Direct protein sequencing;Glycolysis;NAD;Nucleotide-binding;Oxidoreductase;Reference proteome;	;1.2.1.12;;	1.2.1.12;	;;K00134;;	;K00134;	UniRef50_P0C0G6	EMPTY	EMPTY	Bacteria	Firmicutes	unknown	Firmicutes	Firmicutes	Firmicutes	Firmicutes	Firmicutes	Firmicutes	50	0	0	0	0	0	0	0	0	0	0	0	0	0	0	0	0	0	0	5	0	1	2	3	4	6	6	5	4	1	1
Meta-Protein 4536	Metagenome Unknown		;;		;;					Uncategorized	Uncategorized	unknown	Uncategorized	Uncategorized	Uncategorized	Uncategorized	Uncategorized	Uncategorized	1	0	0	0	0	0	0	0	0	0	0	0	0	0	0	0	0	0	0	0	0	1	0	0	0	0	0	0	0	0	0
Meta-Protein 2371	Metagenome Unknown	3D-structure;Carbohydrate metabolism;Cell outer membrane;Complete proteome;Lipoprotein;Membrane;Palmitate;Reference proteome;Signal;	;;;	;	;K21571;;	K21571;	UniRef50_G8JZS6	UniRef90_G8JZS6	UniRef100_G8JZS6	Bacteria	Bacteroides thetaiotaomicron VPI-5482	unknown	Bacteroidia	Bacteroidales	Bacteroidaceae	Bacteroides	Bacteroides thetaiotaomicron	Bacteroides thetaiotaomicron VPI-5482	5	0	0	0	0	0	0	0	0	0	0	0	0	0	0	0	0	0	0	0	0	0	0	0	0	2	0	3	0	0	0
Meta-Protein 433	BLAST_TPX_STRMU Thiol peroxidase OS=Streptococcus mutans serotype c (strain ATCC 700610 / UA159) GN=tpx PE=3 SV=1_Q8DUK3	Antioxidant;Complete proteome;Disulfide bond;Oxidoreductase;Peroxidase;Redox-active center;Reference proteome;	;1.11.1.15;;	1.11.1.15;	;K11065;;	K11065;	UniRef50_Q8DUK3	UniRef90_Q8DUK3	UniRef100_Q8DUK3	Bacteria	Streptococcus mutans UA159	unknown	Bacilli	Lactobacillales	Streptococcaceae	Streptococcus	Streptococcus mutans	Streptococcus mutans UA159	36	6	7	7	1	1	1	1	1	0	4	4	3	0	0	0	0	0	0	0	0	0	0	0	0	0	0	0	0	0	0
Meta-Protein 4555	BLAST_EFTU_GEOSE Elongation factor Tu OS=Geobacillus stearothermophilus GN=tuf PE=3 SV=2_O50306	Cytoplasm;Elongation factor;GTP-binding;Nucleotide-binding;Protein biosynthesis;	;;;	;	;;;	;	UniRef50_Q5SHN6	UniRef90_O50306	UniRef100_O50306	Bacteria	Geobacillus stearothermophilus	unknown	Bacilli	Bacillales	Bacillaceae	Geobacillus	Geobacillus stearothermophilus	Geobacillus stearothermophilus	3	0	0	0	0	0	0	0	0	0	0	0	0	0	0	0	0	0	0	0	0	1	1	0	0	0	0	0	0	0	0
Meta-Protein 4530	BLAST_FLA_CLOTY Flagellin (Fragment) OS=Clostridium tyrobutyricum GN=fla PE=1 SV=2_P80583	Bacterial flagellum;Direct protein sequencing;Secreted;	;;;	;	;;;	;	UniRef50_P80583	UniRef90_P80583	UniRef100_P80583	Bacteria	Clostridium tyrobutyricum	unknown	Clostridia	Clostridiales	Clostridiaceae	Clostridium	Clostridium tyrobutyricum	Clostridium tyrobutyricum	4	0	0	0	0	0	0	0	0	0	0	0	0	0	0	0	0	0	0	0	0	1	0	1	0	1	1	0	0	0	0
Meta-Protein 402	BLAST_YACL_BACSU Uncharacterized PIN and TRAM-domain containing protein YacL OS=Bacillus subtilis (strain 168) GN=yacL PE=2 SV=2_Q06754	;3D-structure;Complete proteome;Hydrolase;Magnesium;Membrane;Metal-binding;Nuclease;Reference proteome;Signal;Toxin-antitoxin system;Transmembrane;Transmembrane helix;	;;3.1.-.-;;	;3.1.-.-;	;;;	;	UniRef50_Q5SKV3	UniRef90_Q5SKV3	UniRef100_Q5SKV3	Bacteria	Bacteria	unknown	Bacteria	Bacteria	Bacteria	Bacteria	Bacteria	Bacteria	2	1	0	0	0	0	0	0	1	0	0	0	0	0	0	0	0	0	0	0	0	0	0	0	0	0	0	0	0	0	0
Meta-Protein 2818	BLAST_RS4_CLOBB 30S ribosomal protein S4 OS=Clostridium botulinum (strain Eklund 17B / Type B) GN=rpsD PE=3 SV=1_B2TIK3	Complete proteome;RNA-binding;Reference proteome;Ribonucleoprotein;Ribosomal protein;rRNA-binding;	;;;	;	;K02986;;	K02986;	UniRef50_Q9X1I3	UniRef90_A6LPT9	UniRef100_B2UYD8	Bacteria	Clostridium botulinum	unknown	Clostridia	Clostridiales	Clostridiaceae	Clostridium	Clostridium botulinum	Clostridium botulinum	4	2	1	0	0	0	0	0	0	0	1	0	0	0	0	0	0	0	0	0	0	0	0	0	0	0	0	0	0	0	0
Meta-Protein 1306	BLAST_Y621_METJA Uncharacterized HTH-type transcriptional regulator MJ0621 OS=Methanocaldococcus jannaschii (strain ATCC 43067 / DSM 2661 / JAL-1 / JCM 10045 / NBRC 100440) GN=MJ0621 PE=4 SV=1_Q58038	Complete proteome;DNA-binding;Reference proteome;Transcription;Transcription regulation;	;;;	;	;;;	;	UniRef50_Q58038	UniRef90_Q58038	UniRef100_Q58038	Archaea	Methanocaldococcus jannaschii DSM 2661	unknown	Methanococci	Methanococcales	Methanocaldococcaceae	Methanocaldococcus	Methanocaldococcus jannaschii	Methanocaldococcus jannaschii DSM 2661	1	0	0	0	0	0	0	0	0	0	0	0	1	0	0	0	0	0	0	0	0	0	0	0	0	0	0	0	0	0	0
Meta-Protein 2424	BLAST_AROD_LISMH 3-dehydroquinate dehydratase OS=Listeria monocytogenes serotype 4a (strain HCC23) GN=aroD PE=3 SV=1_B8DCI1	3D-structure;Amino-acid biosynthesis;Aromatic amino acid biosynthesis;Complete proteome;Direct protein sequencing;Lyase;Reference proteome;Schiff base;	;4.2.1.10;;	4.2.1.10;	;;K03785;;	;K03785;	EMPTY	EMPTY	EMPTY	Bacteria	Bacteria	unknown	Bacteria	Bacteria	Bacteria	Bacteria	Bacteria	Bacteria	3	0	0	0	0	0	0	0	0	0	0	0	0	0	0	0	0	0	0	0	0	0	0	0	0	1	2	0	0	0	0
Meta-Protein 1252	TF2B_METMZ Transcription initiation factor IIB OS=Methanosarcina mazei GN=tfb PE=3 SV=1	Complete proteome;Metal-binding;Reference proteome;Repeat;Transcription;Transcription regulation;Zinc;Zinc-finger;	;;;	;	;;K03124;;	;K03124;	UniRef50_Q9HRE6	EMPTY	EMPTY	Archaea	Methanosarcina	unknown	Methanomicrobia	Methanosarcinales	Methanosarcinaceae	Methanosarcina	Methanosarcina	Methanosarcina	2	0	0	0	0	0	0	0	0	0	2	0	0	0	0	0	0	0	0	0	0	0	0	0	0	0	0	0	0	0	0
Meta-Protein 4232	QRIC2_HUMAN Glutamine-rich protein 2 OS=Homo sapiens GN=QRICH2 PE=1 SV=1	Alternative splicing;Coiled coil;Complete proteome;Polymorphism;Reference proteome;	;;;	;	;;;	;	UniRef50_Q9H0J4	UniRef90_Q9H0J4	UniRef100_Q9H0J4	Eukaryota	Metazoa	unknown	Mammalia	Primates	Hominidae	Homo	Homo sapiens	Homo sapiens	1	0	0	0	0	0	0	0	0	0	1	0	0	0	0	0	0	0	0	0	0	0	0	0	0	0	0	0	0	0	0
Meta-Protein 1704	BLAST_PTAS_THETC Phosphate acetyltransferase OS=Thermoanaerobacterium thermosaccharolyticum (strain ATCC 7956 / DSM 571 / NCIB 9385 / NCA 3814) GN=pta PE=3 SV=2_Q59330	Acyltransferase;Complete proteome;Cytoplasm;Reference proteome;Transferase;	;2.3.1.8;;	2.3.1.8;	;K00625;;	K00625;	UniRef50_P71103	EMPTY	EMPTY	Bacteria	Clostridia	unknown	Clostridia	Clostridia	Clostridia	Clostridia	Clostridia	Clostridia	26	0	0	0	0	0	0	0	0	0	0	0	0	0	0	0	0	0	0	4	3	3	8	4	2	0	0	0	0	0	0
Meta-Protein 3262	BLAST_DBH_LACLA DNA-binding protein HU OS=Lactococcus lactis subsp. lactis (strain IL1403) GN=hup PE=3 SV=1_Q9CI64	3D-structure;Complete proteome;DNA condensation;DNA-binding;Reference proteome;	;;;	;	;K03530;;	K03530;	UniRef50_P68573	UniRef90_Q9CI64	UniRef100_Q9CI64	Bacteria	Lactococcus lactis subsp. lactis Il1403	unknown	Bacilli	Lactobacillales	Streptococcaceae	Lactococcus	Lactococcus lactis subsp. lactis Il1403	Lactococcus lactis subsp. lactis	14	2	4	3	2	1	0	0	0	0	2	0	0	0	0	0	0	0	0	0	0	0	0	0	0	0	0	0	0	0	0
Meta-Protein 4473	BLAST_AOXA_BOVIN Aldehyde oxidase 1 OS=Bos taurus GN=AOX1 PE=1 SV=2_P48034	2Fe-2S;Complete proteome;Cytoplasm;Direct protein sequencing;FAD;Flavoprotein;Iron;Iron-sulfur;Metal-binding;Molybdenum;Oxidoreductase;Phosphoprotein;Reference proteome;	;1.17.3.-;1.2.3.1;;	1.17.3.-;1.2.3.1;	;K00157;;	K00157;	UniRef50_Q06278	UniRef90_P48034	UniRef100_P48034	Eukaryota	Metazoa	unknown	Mammalia	Bos taurus	Bovidae	Bos	Bos taurus	Bos taurus	1	0	0	0	0	0	0	0	0	0	0	0	0	0	0	0	0	0	0	0	1	0	0	0	0	0	0	0	0	0	0
Meta-Protein 174	BLAST_EFG_MOOTA Elongation factor G OS=Moorella thermoacetica (strain ATCC 39073 / JCM 9320) GN=fusA PE=3 SV=1_Q2RFP4	Complete proteome;Cytoplasm;Elongation factor;GTP-binding;Nucleotide-binding;Protein biosynthesis;Reference proteome;	;;;	;	;K02355;;	K02355;	UniRef50_P80868	EMPTY	EMPTY	Bacteria	Bacteria	unknown	Bacteria	Bacteria	Bacteria	Bacteria	Bacteria	Bacteria	17	3	3	4	1	1	1	2	2	0	0	0	0	0	0	0	0	0	0	0	0	0	0	0	0	0	0	0	0	0	0
Meta-Protein 4014	BLAST_RL11_LACP7 50S ribosomal protein L11 OS=Lachnoclostridium phytofermentans (strain ATCC 700394 / DSM 18823 / ISDg) GN=rplK PE=3 SV=1_A9KJM0	Complete proteome;Methylation;RNA-binding;Reference proteome;Ribonucleoprotein;Ribosomal protein;rRNA-binding;	;;;	;	;K02867;;	K02867;	UniRef50_P62441	UniRef90_A9KJM0	UniRef100_A9KJM0	Bacteria	Clostridium phytofermentans ISDg	unknown	Clostridia	Clostridiales	Clostridiaceae	Clostridium	Clostridium phytofermentans	Clostridium phytofermentans ISDg	1	0	0	0	0	0	0	1	0	0	0	0	0	0	0	0	0	0	0	0	0	0	0	0	0	0	0	0	0	0	0
Meta-Protein 711	CYB6_MORIN Cytochrome b6 OS=Morus indica GN=petB PE=3 SV=1	3D-structure;Alternative splicing;Chloroplast;Complete proteome;Cyanelle;Direct protein sequencing;Electron transport;Heme;Iron;Membrane;Metal-binding;Photosynthesis;Plastid;RNA editing;Reference proteome;Thylakoid;Transmembrane;Transmembrane helix;Transport;	;;;	;	;;K02635;;	;K02635;	UniRef50_Q00471	UniRef90_P56773	UniRef100_Q71KQ6	cellular organisms	cellular organisms	unknown	cellular organisms	cellular organisms	cellular organisms	cellular organisms	cellular organisms	cellular organisms	34	3	2	4	5	4	1	3	2	5	5	0	0	0	0	0	0	0	0	0	0	0	0	0	0	0	0	0	0	0	0
Meta-Protein 3188	BLAST_MGLP_BAC25 Thermostable monoacylglycerol lipase OS=Bacillus sp. (strain H-257) PE=1 SV=3_P82597	3D-structure;Direct protein sequencing;Hydrolase;Serine esterase;	;3.1.1.23;;	3.1.1.23;	;;;	;	UniRef50_P82597	UniRef90_P82597	UniRef100_P82597	Bacteria	Bacillus sp. H-257	unknown	Bacilli	Bacillales	Bacillaceae	Bacillus	Bacillus sp. H-257	Bacillus sp. H-257	2	1	1	0	0	0	0	0	0	0	0	0	0	0	0	0	0	0	0	0	0	0	0	0	0	0	0	0	0	0	0
Meta-Protein 106	BLAST_SUSD_BACTN Starch-binding protein SusD OS=Bacteroides thetaiotaomicron (strain ATCC 29148 / DSM 2079 / NCTC 10582 / E50 / VPI-5482) GN=susD PE=1 SV=1_Q8A1G2	3D-structure;Calcium;Carbohydrate metabolism;Cell outer membrane;Complete proteome;Lipoprotein;Membrane;Metal-binding;Palmitate;Reference proteome;Signal;	;;;	;	;K21572;;	K21572;	UniRef50_Q8A1G2	UniRef90_Q8A1G2	UniRef100_Q8A1G2	Bacteria	Bacteroides thetaiotaomicron VPI-5482	unknown	Bacteroidia	Bacteroidales	Bacteroidaceae	Bacteroides	Bacteroides thetaiotaomicron	Bacteroides thetaiotaomicron VPI-5482	172	29	22	24	12	12	14	11	10	11	7	4	8	1	1	1	2	2	1	0	0	0	0	0	0	0	0	0	0	0	0
Meta-Protein 3608	BLAST_SCPA_XYLFA Segregation and condensation protein A OS=Xylella fastidiosa (strain 9a5c) GN=scpA PE=3 SV=2_Q9PAP4	Cell cycle;Cell division;Chromosome partition;Complete proteome;Cytoplasm;Reference proteome;	;;;	;	;K05896;;	K05896;	UniRef50_Q9PAP4	UniRef90_Q9PAP4	EMPTY	Bacteria	Xylella fastidiosa	unknown	Gammaproteobacteria	Xanthomonadales	Xanthomonadaceae	Xylella	Xylella fastidiosa	Xylella fastidiosa	1	0	0	0	1	0	0	0	0	0	0	0	0	0	0	0	0	0	0	0	0	0	0	0	0	0	0	0	0	0	0
Meta-Protein 3780	BLAST_TDXH_METMA Peroxiredoxin OS=Methanosarcina mazei (strain ATCC BAA-159 / DSM 3647 / Goe1 / Go1 / JCM 11833 / OCM 88) GN=MM_0814 PE=3 SV=1_Q8PYP6	Antioxidant;Complete proteome;Cytoplasm;Disulfide bond;Oxidoreductase;Peroxidase;Redox-active center;Reference proteome;	;1.11.1.15;;	1.11.1.15;	;K03386;;	K03386;	UniRef50_Q8PYP6	UniRef90_Q8PYP6	UniRef100_Q8PYP6	Archaea	Methanosarcina mazei Go1	unknown	Methanomicrobia	Methanosarcinales	Methanosarcinaceae	Methanosarcina	Methanosarcina mazei	Methanosarcina mazei Go1	2	0	0	0	1	1	0	0	0	0	0	0	0	0	0	0	0	0	0	0	0	0	0	0	0	0	0	0	0	0	0
Meta-Protein 3952	Metagenome unknown		;;		;;					Uncategorized	Uncategorized	unknown	Uncategorized	Uncategorized	Uncategorized	Uncategorized	Uncategorized	Uncategorized	1	0	0	0	0	0	1	0	0	0	0	0	0	0	0	0	0	0	0	0	0	0	0	0	0	0	0	0	0	0	0
Meta-Protein 1153	BLAST_FABG_RICFE 3-oxoacyl-[acyl-carrier-protein] reductase FabG OS=Rickettsia felis (strain ATCC VR-1525 / URRWXCal2) GN=fabG PE=3 SV=1_Q4UK62	Complete proteome;Fatty acid biosynthesis;Fatty acid metabolism;Lipid biosynthesis;Lipid metabolism;NADP;Oxidoreductase;	;1.1.1.100;;	1.1.1.100;	;K00059;;	K00059;	UniRef50_Q92GE0	UniRef90_Q92GE0	UniRef100_Q4UK62	Bacteria	Rickettsia felis URRWXCal2	unknown	Alphaproteobacteria	Rickettsiales	Rickettsiaceae	Rickettsia	Rickettsia felis	Rickettsia felis URRWXCal2	1	0	0	0	0	0	0	1	0	0	0	0	0	0	0	0	0	0	0	0	0	0	0	0	0	0	0	0	0	0	0
Meta-Protein 2806	BLAST_SUSC_BACTN TonB-dependent receptor SusC OS=Bacteroides thetaiotaomicron (strain ATCC 29148 / DSM 2079 / NCTC 10582 / E50 / VPI-5482) GN=susC PE=1 SV=1_Q8A1G1	Carbohydrate metabolism;Cell outer membrane;Complete proteome;Membrane;Receptor;Reference proteome;Signal;TonB box;Transmembrane;Transmembrane beta strand;Transport;	;;;	;	;K21573;;	K21573;	UniRef50_Q8A1G1	UniRef90_Q8A1G1	UniRef100_Q8A1G1	Bacteria	Bacteroides thetaiotaomicron VPI-5482	unknown	Bacteroidia	Bacteroidales	Bacteroidaceae	Bacteroides	Bacteroides thetaiotaomicron	Bacteroides thetaiotaomicron VPI-5482	217	13	12	11	20	16	25	25	29	24	6	5	3	3	3	4	7	4	7	0	0	0	0	0	0	0	0	0	0	0	0
Meta-Protein 4170	PUB57_ARATH U-box domain-containing protein 57 OS=Arabidopsis thaliana GN=PUB57 PE=2 SV=2	Alternative splicing;Complete proteome;Reference proteome;Transferase;Ubl conjugation pathway;	;2.3.2.27;;	2.3.2.27;	;;;	;	UniRef50_Q9SGT1	UniRef90_Q9SGT1	UniRef100_Q9SGT1	Eukaryota	Viridiplantae	unknown	Arabidopsis thaliana	Brassicales	Brassicaceae	Arabidopsis	Arabidopsis thaliana	Arabidopsis thaliana	1	0	0	0	0	0	0	0	0	0	1	0	0	0	0	0	0	0	0	0	0	0	0	0	0	0	0	0	0	0	0
Meta-Protein 1534	Metagenome Unknown		;;		;;					Uncategorized	Uncategorized	unknown	Uncategorized	Uncategorized	Uncategorized	Uncategorized	Uncategorized	Uncategorized	7	0	0	0	0	0	0	0	0	0	0	0	0	0	0	0	0	0	0	2	2	0	0	0	1	0	0	0	1	1	0
Meta-Protein 1671	BLAST_CUCIN_ORYSI Cupincin OS=Oryza sativa subsp. indica GN=OsI_13867 PE=1 SV=1_B8AL97	Allergen;Complete proteome;Direct protein sequencing;Glycoprotein;Hydrolase;Metal-binding;Metalloprotease;Protease;Reference proteome;Secreted;Seed storage protein;Signal;Storage protein;Zinc;	;3.4.-.-;;	3.4.-.-;	;;;	;	UniRef50_B8AL97	UniRef90_B8AL97	UniRef100_Q852L2	Eukaryota	Viridiplantae	unknown	Liliopsida	Poales	Poaceae	Oryza	Oryza sativa	Oryza sativa	40	0	0	0	0	0	0	0	0	0	0	0	0	0	0	0	0	0	0	2	4	4	3	5	3	2	3	4	1	2	2
Meta-Protein 416	BLAST_MUTS_BACLD DNA mismatch repair protein MutS OS=Bacillus licheniformis (strain ATCC 14580 / DSM 13 / JCM 2505 / NBRC 12200 / NCIMB 9375 / NRRL NRS-1264 / Gibson 46) GN=mutS PE=3 SV=1_Q65JE2	ATP-binding;Complete proteome;DNA damage;DNA repair;DNA-binding;Nucleotide-binding;Reference proteome;	;;;	;	;K03555;;	K03555;	UniRef50_P49849	UniRef90_Q65JE2	UniRef100_Q65JE2	Bacteria	Bacillus licheniformis DSM 13 = ATCC 14580	unknown	Bacilli	Bacillales	Bacillaceae	Bacillus	Bacillus licheniformis	Bacillus licheniformis DSM 13 = ATCC 14580	16	5	5	3	0	0	0	0	0	0	1	2	0	0	0	0	0	0	0	0	0	0	0	0	0	0	0	0	0	0	0
Meta-Protein 1017	BLAST_SURA_RHOFT Chaperone SurA OS=Rhodoferax ferrireducens (strain ATCC BAA-621 / DSM 15236 / T118) GN=surA PE=3 SV=1_Q223E5	Cell membrane;Chaperone;Complete proteome;Isomerase;Lipoprotein;Membrane;Palmitate;Periplasm;Reference proteome;Repeat;Rotamase;Signal;	;5.2.1.8;;	5.2.1.8;	;K03771;K07533;;	K03771;K07533;	EMPTY	EMPTY	EMPTY	Bacteria	Bacteria	unknown	Bacteria	Bacteria	Bacteria	Bacteria	Bacteria	Bacteria	1	0	0	0	1	0	0	0	0	0	0	0	0	0	0	0	0	0	0	0	0	0	0	0	0	0	0	0	0	0	0
Meta-Protein 4953	RL18_PEPD6 50S ribosomal protein L18 OS=Peptoclostridium difficile (strain 630) GN=rplR PE=3 SV=1	Complete proteome;Reference proteome;Ribonucleoprotein;Ribosomal protein;RNA-binding;rRNA-binding;	;;;	;	;K02881;;	K02881;	UniRef50_Q18CH4	UniRef90_Q18CH4	UniRef100_Q18CH4	Bacteria	Clostridium difficile 630	unknown	Clostridia	Clostridiales	Peptostreptococcaceae	Clostridium difficile 630	[Clostridium] difficile	Clostridium difficile 630	1	0	0	0	0	0	0	0	0	0	0	0	0	0	0	0	0	0	0	0	0	0	0	0	0	0	0	0	1	0	0
Meta-Protein 1645	Metagenome Unknown		;;		;;					Uncategorized	Uncategorized	unknown	Uncategorized	Uncategorized	Uncategorized	Uncategorized	Uncategorized	Uncategorized	7	0	0	0	0	0	0	0	0	0	0	0	0	0	0	0	0	0	0	3	1	0	0	0	3	0	0	0	0	0	0
Meta-Protein 656	Metagenome unknown		;;		;;					Uncategorized	Uncategorized	unknown	Uncategorized	Uncategorized	Uncategorized	Uncategorized	Uncategorized	Uncategorized	17	1	2	0	2	1	2	0	0	0	1	3	2	1	1	0	1	0	0	0	0	0	0	0	0	0	0	0	0	0	0
Meta-Protein 2136	BLAST_YIAL_ECOLI Protein YiaL OS=Escherichia coli (strain K12) GN=yiaL PE=3 SV=1_P37673	Complete proteome;Reference proteome;	;;;	;	;;;	;	UniRef50_P37673	UniRef90_P37673	UniRef100_P37673	Bacteria	Escherichia coli K-12	unknown	Gammaproteobacteria	Enterobacteriales	Enterobacteriaceae	Escherichia	Escherichia coli	Escherichia coli K-12	1	0	0	0	0	0	0	0	0	0	0	0	0	0	0	0	0	0	0	0	0	0	1	0	0	0	0	0	0	0	0
Meta-Protein 3286	BLAST_EFTU_ENTFA Elongation factor Tu OS=Enterococcus faecalis (strain ATCC 700802 / V583) GN=tuf PE=3 SV=1_Q839G8	Complete proteome;Cytoplasm;Elongation factor;GTP-binding;Nucleotide-binding;Protein biosynthesis;Reference proteome;	;;;	;	;K02358;;	K02358;	UniRef50_Q5SHN6	UniRef90_Q839G8	UniRef100_Q839G8	Bacteria	Enterococcus faecalis V583	unknown	Bacilli	Lactobacillales	Enterococcaceae	Enterococcus	Enterococcus faecalis	Enterococcus faecalis V583	10	2	2	2	0	1	0	0	0	0	1	2	0	0	0	0	0	0	0	0	0	0	0	0	0	0	0	0	0	0	0
Meta-Protein 3939	Metagenome unknown		;;		;;					Uncategorized	Uncategorized	unknown	Uncategorized	Uncategorized	Uncategorized	Uncategorized	Uncategorized	Uncategorized	1	0	0	0	0	0	1	0	0	0	0	0	0	0	0	0	0	0	0	0	0	0	0	0	0	0	0	0	0	0	0
Meta-Protein 1561	BLAST_RL24_BACFR 50S ribosomal protein L24 OS=Bacteroides fragilis (strain YCH46) GN=rplX PE=3 SV=1_Q64NL9	Complete proteome;RNA-binding;Reference proteome;Ribonucleoprotein;Ribosomal protein;rRNA-binding;	;;;	;	;K02895;;	K02895;	EMPTY	EMPTY	EMPTY	Bacteria	Bacteroides	unknown	Bacteroidia	Bacteroidales	Bacteroidaceae	Bacteroides	Bacteroides	Bacteroides	1	0	0	0	0	0	0	0	0	0	0	0	0	0	0	0	0	0	0	1	0	0	0	0	0	0	0	0	0	0	0
Meta-Protein 1008	BLAST_MDH_BORPD Malate dehydrogenase OS=Bordetella petrii (strain ATCC BAA-461 / DSM 12804 / CCUG 43448) GN=mdh PE=3 SV=1_A9IIS3	Complete proteome;NAD;Oxidoreductase;Reference proteome;Tricarboxylic acid cycle;	;1.1.1.37;;	1.1.1.37;	;K00024;;	K00024;	UniRef50_F1C7I4	UniRef90_A4SWW0	UniRef100_A4SWW0	Bacteria	Burkholderiales	unknown	Betaproteobacteria	Burkholderiales	Burkholderiales	Burkholderiales	Burkholderiales	Burkholderiales	5	0	0	0	1	1	3	0	0	0	0	0	0	0	0	0	0	0	0	0	0	0	0	0	0	0	0	0	0	0	0
Meta-Protein 9	BLAST_ILVE_HAEIN Branched-chain-amino-acid aminotransferase OS=Haemophilus influenzae (strain ATCC 51907 / DSM 11121 / KW20 / Rd) GN=ilvE PE=3 SV=1_P54689	Amino-acid biosynthesis;Aminotransferase;Branched-chain amino acid biosynthesis;Complete proteome;Pyridoxal phosphate;Reference proteome;Transferase;	;2.6.1.42;;	2.6.1.42;	;K00826;;	K00826;	UniRef50_P54689	UniRef90_P54689	UniRef100_P54689	Bacteria	Haemophilus influenzae Rd KW20	unknown	Gammaproteobacteria	Pasteurellales	Pasteurellaceae	Haemophilus	Haemophilus influenzae	Haemophilus influenzae Rd KW20	33	5	8	3	6	1	1	5	3	1	0	0	0	0	0	0	0	0	0	0	0	0	0	0	0	0	0	0	0	0	0
Meta-Protein 4323	Metagenome Unknown		;;		;;					Uncategorized	Uncategorized	unknown	Uncategorized	Uncategorized	Uncategorized	Uncategorized	Uncategorized	Uncategorized	5	0	0	0	0	0	0	0	0	0	0	0	0	0	0	0	0	0	0	3	1	0	0	0	0	0	0	0	0	0	1
Meta-Protein 146	Metagenome unknown		;;		;;					Uncategorized	Uncategorized	unknown	Uncategorized	Uncategorized	Uncategorized	Uncategorized	Uncategorized	Uncategorized	1182	96	98	93	125	112	84	107	124	107	48	27	28	21	13	10	30	29	30	0	0	0	0	0	0	0	0	0	0	0	0
Meta-Protein 4703	BLAST_EFG_XYLFT Elongation factor G OS=Xylella fastidiosa (strain Temecula1 / ATCC 700964) GN=fusA PE=3 SV=1_Q87A35	Complete proteome;Cytoplasm;Elongation factor;GTP-binding;Nucleotide-binding;Protein biosynthesis;Reference proteome;	;;;	;	;K02355;;	K02355;	UniRef50_P43925	UniRef90_Q9PA90	EMPTY	Bacteria	Xylella fastidiosa	unknown	Gammaproteobacteria	Xanthomonadales	Xanthomonadaceae	Xylella	Xylella fastidiosa	Xylella fastidiosa	4	0	0	0	0	0	0	0	0	0	0	0	0	0	0	0	0	0	0	0	0	0	3	1	0	0	0	0	0	0	0
Meta-Protein 375	BLAST_Y1039_PYRHO Uncharacterized ABC transporter extracellular-binding protein PH1039 OS=Pyrococcus horikoshii (strain ATCC 700860 / DSM 12428 / JCM 9974 / NBRC 100139 / OT-3) GN=PH1039 PE=3 SV=1_O58758	3D-structure;Acetylation;Cell membrane;Complete proteome;Direct protein sequencing;Lipoprotein;Membrane;Palmitate;Periplasm;Reference proteome;Signal;Sugar transport;Transport;	;;;	;	;;K02027;K10108;K10236;K17234;;	;K02027;K10108;K10236;K17234;	UniRef50_P29822	UniRef90_P29822	UniRef100_P29822	cellular organisms	cellular organisms	unknown	cellular organisms	cellular organisms	cellular organisms	cellular organisms	cellular organisms	cellular organisms	130	16	16	13	20	14	5	10	12	10	5	2	2	0	0	0	0	3	2	0	0	0	0	0	0	0	0	0	0	0	0
Meta-Protein 4037	BLAST_MTAD1_ARCFU 5-methylthioadenosine/S-adenosylhomocysteine deaminase 1 OS=Archaeoglobus fulgidus (strain ATCC 49558 / VC-16 / DSM 4304 / JCM 9628 / NBRC 100126) GN=mtaD1 PE=3 SV=1_O29701	Complete proteome;Hydrolase;Metal-binding;Reference proteome;Zinc;	;3.5.4.28;3.5.4.31;;	3.5.4.28;3.5.4.31;	;K12960;;	K12960;	UniRef50_O29701	UniRef90_O29701	UniRef100_O29701	Archaea	Archaeoglobus fulgidus DSM 4304	unknown	Archaeoglobi	Archaeoglobales	Archaeoglobaceae	Archaeoglobus	Archaeoglobus fulgidus	Archaeoglobus fulgidus DSM 4304	1	0	0	0	0	0	0	1	0	0	0	0	0	0	0	0	0	0	0	0	0	0	0	0	0	0	0	0	0	0	0
Meta-Protein 3544	Metagenome unknown		;;		;;					Uncategorized	Uncategorized	unknown	Uncategorized	Uncategorized	Uncategorized	Uncategorized	Uncategorized	Uncategorized	24	0	0	0	8	6	4	4	1	1	0	0	0	0	0	0	0	0	0	0	0	0	0	0	0	0	0	0	0	0	0
Meta-Protein 2129	BLAST_OAR_MYXXA Protein oar OS=Myxococcus xanthus GN=oar PE=1 SV=1_P38370	Cell outer membrane;Direct protein sequencing;Membrane;Signal;	;;;	;	;;;	;	UniRef50_P38370	UniRef90_P38370	UniRef100_P38370	Bacteria	Myxococcus xanthus	unknown	Deltaproteobacteria	Myxococcales	Myxococcaceae	Myxococcus	Myxococcus xanthus	Myxococcus xanthus	1	0	0	0	0	0	0	0	0	0	0	0	0	0	0	0	0	0	0	0	0	0	1	0	0	0	0	0	0	0	0
Meta-Protein 3690	Metagenome unknown		;;		;;					Uncategorized	Uncategorized	unknown	Uncategorized	Uncategorized	Uncategorized	Uncategorized	Uncategorized	Uncategorized	6	0	0	0	4	1	1	0	0	0	0	0	0	0	0	0	0	0	0	0	0	0	0	0	0	0	0	0	0	0	0
Meta-Protein 3307	BLAST_DPO3B_BACHD Beta sliding clamp OS=Bacillus halodurans (strain ATCC BAA-125 / DSM 18197 / FERM 7344 / JCM 9153 / C-125) GN=dnaN PE=3 SV=1_Q9RCA1	Complete proteome;Cytoplasm;DNA replication;DNA-binding;DNA-directed DNA polymerase;Nucleotidyltransferase;Reference proteome;Transferase;	;;;	;	;K02338;;	K02338;	UniRef50_P05649	UniRef90_Q9RCA1	UniRef100_Q9RCA1	Bacteria	Bacillus halodurans C-125	unknown	Bacilli	Bacillales	Bacillaceae	Bacillus	Bacillus halodurans	Bacillus halodurans C-125	4	1	2	1	0	0	0	0	0	0	0	0	0	0	0	0	0	0	0	0	0	0	0	0	0	0	0	0	0	0	0
Meta-Protein 545	BLAST_UBIG_RUEST Ubiquinone biosynthesis O-methyltransferase OS=Ruegeria sp. (strain TM1040) GN=ubiG PE=3 SV=1_Q1GCH8	Complete proteome;Methyltransferase;Reference proteome;S-adenosyl-L-methionine;Transferase;Ubiquinone biosynthesis;	;2.1.1.222;2.1.1.64;;	2.1.1.222;2.1.1.64;	;K00568;;	K00568;	UniRef50_Q16D32	EMPTY	EMPTY	Bacteria	Ruegeria	unknown	Alphaproteobacteria	Rhodobacterales	Rhodobacteraceae	Ruegeria	Ruegeria	Ruegeria	22	1	1	1	3	1	1	3	1	1	2	2	1	1	0	0	0	2	1	0	0	0	0	0	0	0	0	0	0	0	0
Meta-Protein 2218	ASM3B_HUMAN Acid sphingomyelinase-like phosphodiesterase 3b OS=Homo sapiens GN=SMPDL3B PE=1 SV=2	Alternative splicing;Cell membrane;Complete proteome;Disulfide bond;GPI-anchor;Glycoprotein;Glycosidase;Hydrolase;Immunity;Inflammatory response;Innate immunity;Lipid degradation;Lipid metabolism;Lipoprotein;Membrane;Metal-binding;Polymorphism;Reference proteome;Secreted;Signal;Zinc;	;3.1.4.-;;	3.1.4.-;	;K01128;;	K01128;	UniRef50_P58242	UniRef90_Q92485	UniRef100_Q92485	Eukaryota	Metazoa	unknown	Mammalia	Primates	Hominidae	Homo	Homo sapiens	Homo sapiens	3	0	0	0	0	0	0	0	0	0	0	0	0	0	0	0	0	0	0	0	0	0	0	0	2	1	0	0	0	0	0
Meta-Protein 2538	BLAST_HCNB_PSEAE Hydrogen cyanide synthase subunit HcnB OS=Pseudomonas aeruginosa (strain ATCC 15692 / DSM 22644 / CIP 104116 / JCM 14847 / LMG 12228 / 1C / PRS 101 / PAO1) GN=hcnB PE=1 SV=1_Q9I1S2	Cell membrane;Complete proteome;Membrane;Oxidoreductase;Reference proteome;	;1.4.99.5;;	1.4.99.5;	;K10815;;	K10815;	UniRef50_Q9I1S2	UniRef90_Q9I1S2	UniRef100_Q9I1S2	Bacteria	Pseudomonas aeruginosa PAO1	unknown	Gammaproteobacteria	Pseudomonadales	Pseudomonadaceae	Pseudomonas	Pseudomonas aeruginosa	Pseudomonas aeruginosa PAO1	1	0	0	0	0	0	0	0	0	0	0	0	0	0	0	0	0	0	0	0	0	0	0	0	0	0	0	0	0	0	0
Meta-Protein 907	BLAST_KYNB_SALRD Kynurenine formamidase OS=Salinibacter ruber (strain DSM 13855 / M31) GN=kynB PE=3 SV=1_Q2S2F5	3D-structure;Complete proteome;Hydrolase;Reference proteome;Tryptophan catabolism;	;;3.5.1.9;;	;3.5.1.9;	;;K07130;;	;K07130;	UniRef50_Q81CK1	UniRef90_Q81CK1	EMPTY	cellular organisms	cellular organisms	unknown	cellular organisms	cellular organisms	cellular organisms	cellular organisms	cellular organisms	cellular organisms	1	0	0	0	1	0	0	0	0	0	0	0	0	0	0	0	0	0	0	0	0	0	0	0	0	0	0	0	0	0	0
Meta-Protein 3016	BLAST_ACOA_BACSU Acetoin:2,6-dichlorophenolindophenol oxidoreductase subunit alpha OS=Bacillus subtilis (strain 168) GN=acoA PE=2 SV=2_O31404	Acetoin catabolism;Complete proteome;Oxidoreductase;Reference proteome;Thiamine pyrophosphate;	;1.1.1.-;;	1.1.1.-;	;K21416;;	K21416;	UniRef50_O31404	UniRef90_O31404	UniRef100_O31404	Bacteria	Bacillus subtilis subsp. subtilis str. 168	unknown	Bacilli	Bacillales	Bacillaceae	Bacillus	Bacillus subtilis subsp. subtilis str. 168	Bacillus subtilis subsp. subtilis	7	1	2	0	2	1	0	0	0	1	0	0	0	0	0	0	0	0	0	0	0	0	0	0	0	0	0	0	0	0	0
Meta-Protein 3837	Metagenome unknown		;;		;;					Uncategorized	Uncategorized	unknown	Uncategorized	Uncategorized	Uncategorized	Uncategorized	Uncategorized	Uncategorized	1	0	0	0	0	1	0	0	0	0	0	0	0	0	0	0	0	0	0	0	0	0	0	0	0	0	0	0	0	0	0
Meta-Protein 90	BLAST_RUBY_PORGI Rubrerythrin OS=Porphyromonas gingivalis (strain ATCC BAA-308 / W83) GN=rbr PE=2 SV=1_Q9AGG3	Complete proteome;Cytoplasm;Electron transport;Iron;Metal-binding;Reference proteome;Transport;	;;;	;	;;;	;	UniRef50_Q9AGG3	UniRef90_Q9AGG3	UniRef100_Q9AGG3	Bacteria	Bacteria	unknown	Bacteria	Bacteria	Bacteria	Bacteria	Bacteria	Bacteria	7	1	1	1	0	1	0	1	1	1	0	0	0	0	0	0	0	0	0	0	0	0	0	0	0	0	0	0	0	0	0
Meta-Protein 4435	BLAST_ENO_EUBE2 Enolase OS=Eubacterium eligens (strain ATCC 27750 / VPI C15-48) GN=eno PE=3 SV=1_C4Z1M9	Complete proteome;Cytoplasm;Glycolysis;Lyase;Magnesium;Metal-binding;Reference proteome;Secreted;	;4.2.1.11;;	4.2.1.11;	;K01689;;	K01689;	UniRef50_Q8IJN7	UniRef90_C4Z1M9	UniRef100_C4Z1M9	Bacteria	Eubacterium eligens ATCC 27750	unknown	Clostridia	Clostridiales	Eubacteriaceae	Eubacterium	Eubacterium eligens	Eubacterium eligens ATCC 27750	6	0	0	0	0	0	0	0	0	0	0	0	0	0	0	0	0	0	0	2	2	0	0	0	2	0	0	0	0	0	0
Meta-Protein 2705	BLAST_LIVJ_SALTY Leu/Ile/Val/Thr-binding protein OS=Salmonella typhimurium (strain LT2 / SGSC1412 / ATCC 700720) GN=livJ PE=1 SV=1_P17215	Amino-acid transport;Cell membrane;Chemotaxis;Complete proteome;Direct protein sequencing;Disulfide bond;Membrane;Periplasm;Reference proteome;Signal;Transport;	;;;	;	;;K01999;;	;K01999;	EMPTY	EMPTY	EMPTY	cellular organisms	cellular organisms	unknown	cellular organisms	cellular organisms	cellular organisms	cellular organisms	cellular organisms	cellular organisms	1	0	0	0	0	0	0	0	0	0	0	0	0	0	0	0	0	0	0	0	0	0	0	0	0	0	0	0	0	0	0
Meta-Protein 2970	Metagenome unknown		;;		;;					Uncategorized	Uncategorized	unknown	Uncategorized	Uncategorized	Uncategorized	Uncategorized	Uncategorized	Uncategorized	3	1	0	1	0	0	0	0	1	0	0	0	0	0	0	0	0	0	0	0	0	0	0	0	0	0	0	0	0	0	0
Meta-Protein 1149	BLAST_RECA_BACHD Protein RecA OS=Bacillus halodurans (strain ATCC BAA-125 / DSM 18197 / FERM 7344 / JCM 9153 / C-125) GN=recA PE=3 SV=1_Q9KAA7	ATP-binding;Complete proteome;Cytoplasm;DNA damage;DNA recombination;DNA repair;DNA-binding;Nucleotide-binding;Reference proteome;SOS response;	;;;	;	;K03553;;	K03553;	EMPTY	EMPTY	UniRef100_A0Q0P4	Bacteria	Bacteria	unknown	Bacteria	Bacteria	Bacteria	Bacteria	Bacteria	Bacteria	1	0	0	0	0	0	0	1	0	0	0	0	0	0	0	0	0	0	0	0	0	0	0	0	0	0	0	0	0	0	0
Meta-Protein 2634	BLAST_BRAC_PSEAE Leucine-, isoleucine-, valine-, threonine-, and alanine-binding protein OS=Pseudomonas aeruginosa (strain ATCC 15692 / DSM 22644 / CIP 104116 / JCM 14847 / LMG 12228 / 1C / PRS 101 / PAO1) GN=braC PE=1 SV=2_P21175	ATP-binding;Amino-acid transport;Complete proteome;Direct protein sequencing;Disulfide bond;Ligase;Nucleotide-binding;Periplasm;Protein biosynthesis;Reference proteome;Signal;Transport;	;;6.3.5.7;;	;6.3.5.7;	;K01999;K02433;;	K01999;K02433;	UniRef50_O06491	UniRef90_Q87WR9	EMPTY	Bacteria	Proteobacteria	unknown	Proteobacteria	Proteobacteria	Proteobacteria	Proteobacteria	Proteobacteria	Proteobacteria	4	0	0	0	0	0	0	0	0	0	0	0	0	0	0	0	0	0	0	0	0	0	0	0	0	0	0	0	0	0	0
Meta-Protein 2964	BLAST_SLAP1_CLOTH Cell surface glycoprotein 1 OS=Clostridium thermocellum (strain ATCC 27405 / DSM 1237 / NBRC 103400 / NCIMB 10682 / NRRL B-4536 / VPI 7372) GN=olpB PE=3 SV=2_Q06852	Cell wall;Complete proteome;Reference proteome;Repeat;S-layer;Secreted;Signal;	;;;	;	;;;	;	UniRef50_Q06852	UniRef90_Q06852	UniRef100_Q06852	Bacteria	Clostridium thermocellum ATCC 27405	unknown	Clostridia	Clostridiales	Clostridiaceae	Clostridium	Clostridium thermocellum	Clostridium thermocellum ATCC 27405	26	3	4	4	1	2	2	4	1	3	1	0	1	0	0	0	0	0	0	0	0	0	0	0	0	0	0	0	0	0	0
Meta-Protein 5086	Metagenome unknown		;;		;;					Uncategorized	Uncategorized	unknown	Uncategorized	Uncategorized	Uncategorized	Uncategorized	Uncategorized	Uncategorized	1	0	0	0	0	0	0	0	0	0	0	0	0	0	0	0	0	0	0	0	0	0	0	0	0	0	0	0	0	0	0
Meta-Protein 4576	BLAST_SERC_BACC1 Phosphoserine aminotransferase OS=Bacillus cereus (strain ATCC 10987 / NRS 248) GN=serC PE=3 SV=1_Q734W9	Amino-acid biosynthesis;Aminotransferase;Complete proteome;Cytoplasm;Pyridoxal phosphate;Serine biosynthesis;Transferase;	;2.6.1.52;;	2.6.1.52;	;K00831;;	K00831;	UniRef50_Q885T5	UniRef90_Q81BC0	UniRef100_Q734W9	Bacteria	Bacillus cereus ATCC 10987	unknown	Bacilli	Bacillales	Bacillaceae	Bacillus	Bacillus cereus	Bacillus cereus ATCC 10987	2	0	0	0	0	0	0	0	0	0	0	0	0	0	0	0	0	0	0	0	0	1	1	0	0	0	0	0	0	0	0
Meta-Protein 4961	BLAST_HSP12_SOYBN Class I heat shock protein (Fragment) OS=Glycine max GN=HSP6834-A PE=3 SV=1_P02520	Complete proteome;Cytoplasm;Reference proteome;Stress response;	;;;	;	;;;	;	UniRef50_Q84J50	UniRef90_P02519	UniRef100_P02520	Eukaryota	Viridiplantae	unknown	Glycine max	Fabales	Fabaceae	Glycine	Glycine max	Glycine max	1	0	0	0	0	0	0	0	0	0	0	0	0	0	0	0	0	0	0	0	0	0	0	0	0	0	0	0	0	1	0
Meta-Protein 3770	Metagenome unknown		;;		;;					Uncategorized	Uncategorized	unknown	Uncategorized	Uncategorized	Uncategorized	Uncategorized	Uncategorized	Uncategorized	1	0	0	0	1	0	0	0	0	0	0	0	0	0	0	0	0	0	0	0	0	0	0	0	0	0	0	0	0	0	0
Meta-Protein 4047	BLAST_OTC_PYRAB Ornithine carbamoyltransferase OS=Pyrococcus abyssi (strain GE5 / Orsay) GN=argF PE=3 SV=4_O93656	Amino-acid biosynthesis;Arginine biosynthesis;Complete proteome;Cytoplasm;Transferase;	;2.1.3.3;;	2.1.3.3;	;K00611;;	K00611;	UniRef50_Q51742	UniRef90_Q51742	UniRef100_O93656	Archaea	Pyrococcus abyssi GE5	unknown	Thermococci	Thermococcales	Thermococcaceae	Pyrococcus	Pyrococcus abyssi	Pyrococcus abyssi GE5	1	0	0	0	0	0	0	1	0	0	0	0	0	0	0	0	0	0	0	0	0	0	0	0	0	0	0	0	0	0	0
Meta-Protein 2941	BLAST_YURO_BACSU Uncharacterized ABC transporter extracellular-binding protein YurO OS=Bacillus subtilis (strain 168) GN=yurO PE=3 SV=1_O32156	Cell membrane;Complete proteome;Lipoprotein;Membrane;Palmitate;Reference proteome;Signal;Transport;	;;;	;	;K10117;;	K10117;	UniRef50_O32156	UniRef90_O32156	UniRef100_O32156	Bacteria	Bacillus subtilis subsp. subtilis str. 168	unknown	Bacilli	Bacillales	Bacillaceae	Bacillus	Bacillus subtilis subsp. subtilis str. 168	Bacillus subtilis subsp. subtilis	3	1	1	1	0	0	0	0	0	0	0	0	0	0	0	0	0	0	0	0	0	0	0	0	0	0	0	0	0	0	0
Meta-Protein 1849	Metagenome Unknown		;;		;;					Uncategorized	Uncategorized	unknown	Uncategorized	Uncategorized	Uncategorized	Uncategorized	Uncategorized	Uncategorized	1	0	0	0	0	0	0	0	0	0	0	0	0	0	0	0	0	0	0	0	1	0	0	0	0	0	0	0	0	0	0
Meta-Protein 921	Metagenome unknown		;;		;;					Uncategorized	Uncategorized	unknown	Uncategorized	Uncategorized	Uncategorized	Uncategorized	Uncategorized	Uncategorized	6	0	0	0	2	3	1	0	0	0	0	0	0	0	0	0	0	0	0	0	0	0	0	0	0	0	0	0	0	0	0
Meta-Protein 2496	BLAST_Y1178_METJA Uncharacterized glycosyltransferase MJ1178 OS=Methanocaldococcus jannaschii (strain ATCC 43067 / DSM 2661 / JAL-1 / JCM 10045 / NBRC 100440) GN=MJ1178 PE=3 SV=1_Q58577	Complete proteome;Glycosyltransferase;Reference proteome;Transferase;	;2.4.-.-;;	2.4.-.-;	;;;	;	UniRef50_Q58577	UniRef90_Q58577	UniRef100_Q58577	Archaea	Methanocaldococcus jannaschii DSM 2661	unknown	Methanococci	Methanococcales	Methanocaldococcaceae	Methanocaldococcus	Methanocaldococcus jannaschii	Methanocaldococcus jannaschii DSM 2661	1	0	0	0	0	0	0	0	0	0	0	0	0	0	0	0	0	0	0	0	0	0	0	0	0	0	1	0	0	0	0
Meta-Protein 4966	Metagenome Unknown		;;		;;					Uncategorized	Uncategorized	unknown	Uncategorized	Uncategorized	Uncategorized	Uncategorized	Uncategorized	Uncategorized	1	0	0	0	0	0	0	0	0	0	0	0	0	0	0	0	0	0	0	0	0	0	0	0	0	0	0	0	0	0	1
Meta-Protein 181	Metagenome unknown		;;		;;					Uncategorized	Uncategorized	unknown	Uncategorized	Uncategorized	Uncategorized	Uncategorized	Uncategorized	Uncategorized	390	40	34	33	32	31	31	30	38	26	12	12	12	7	9	7	12	11	13	0	0	0	0	0	0	0	0	0	0	0	0
Meta-Protein 1965	GUB_NICPL Lichenase OS=Nicotiana plumbaginifolia GN=GN1 PE=2 SV=3	Glycosidase;Hydrolase;Plant defense;Pyrrolidone carboxylic acid;Signal;Vacuole;	;3.2.1.39;3.2.1.73;;	3.2.1.39;3.2.1.73;	;;;	;	UniRef50_P33157	EMPTY	EMPTY	Eukaryota	Viridiplantae	unknown	core eudicotyledons	core eudicotyledons	core eudicotyledons	core eudicotyledons	core eudicotyledons	core eudicotyledons	4	0	0	0	0	0	0	0	0	0	0	0	0	0	0	0	0	0	0	0	0	1	1	1	0	0	0	0	0	0	0
Meta-Protein 816	BLAST_SUSD_BACO1 SusD-like protein BACOVA_02651 OS=Bacteroides ovatus (strain ATCC 8483 / DSM 1896 / JCM 5824 / NCTC 11153) GN=BACOVA_02651 PE=1 SV=1_A7LXT5	3D-structure;Carbohydrate metabolism;Cell outer membrane;Complete proteome;Lipoprotein;Membrane;Palmitate;Signal;	;;;	;	;;;	;	UniRef50_A7LXT5	UniRef90_A7LXT5	UniRef100_A7LXT5	Bacteria	Bacteroides ovatus ATCC 8483	unknown	Bacteroidia	Bacteroidales	Bacteroidaceae	Bacteroides	Bacteroides ovatus	Bacteroides ovatus ATCC 8483	34	0	1	0	4	4	6	6	6	7	0	0	0	0	0	0	0	0	0	0	0	0	0	0	0	0	0	0	0	0	0
Meta-Protein 1196	Metagenome unknown	Cell membrane;Lipoprotein;Membrane;Palmitate;Signal;	;;;	;	;;;	;	UniRef50_Q53684	UniRef90_Q53684	UniRef100_Q53684	Bacteria	Streptomyces antibioticus	unknown	Actinobacteria	Actinomycetales	Streptomycetaceae	Streptomyces	Streptomyces antibioticus	Streptomyces antibioticus	9	0	0	0	0	0	0	0	0	0	2	3	3	0	0	0	0	1	0	0	0	0	0	0	0	0	0	0	0	0	0
Meta-Protein 3446	PCKA_PSEAE Phosphoenolpyruvate carboxykinase (ATP) OS=Pseudomonas aeruginosa (strain ATCC 15692 / DSM 22644 / CIP 104116 / JCM 14847 / LMG 12228 / 1C / PRS 101 / PAO1) GN=pckA PE=3 SV=1	ATP-binding;Complete proteome;Cytoplasm;Decarboxylase;Gluconeogenesis;Lyase;Manganese;Metal-binding;Nucleotide-binding;Reference proteome;	;4.1.1.49;;	4.1.1.49;	;K01610;;	K01610;	UniRef50_Q9HTZ7	UniRef90_Q9HTZ7	UniRef100_Q9HTZ7	Bacteria	Pseudomonas aeruginosa PAO1	unknown	Gammaproteobacteria	Pseudomonadales	Pseudomonadaceae	Pseudomonas	Pseudomonas aeruginosa	Pseudomonas aeruginosa PAO1	1	0	1	0	0	0	0	0	0	0	0	0	0	0	0	0	0	0	0	0	0	0	0	0	0	0	0	0	0	0	0
Meta-Protein 1778	Metagenome Unknown		;;		;;					Uncategorized	Uncategorized	unknown	Uncategorized	Uncategorized	Uncategorized	Uncategorized	Uncategorized	Uncategorized	3	0	0	0	0	0	0	0	0	0	0	0	0	0	0	0	0	0	0	1	1	0	0	0	1	0	0	0	0	0	0
Meta-Protein 3650	BLAST_SUSC_BACTN TonB-dependent receptor SusC OS=Bacteroides thetaiotaomicron (strain ATCC 29148 / DSM 2079 / NCTC 10582 / E50 / VPI-5482) GN=susC PE=1 SV=1_Q8A1G1	Carbohydrate metabolism;Cell outer membrane;Complete proteome;Membrane;Receptor;Reference proteome;Signal;TonB box;Transmembrane;Transmembrane beta strand;Transport;	;;;	;	;K21573;;	K21573;	UniRef50_Q8A1G1	UniRef90_Q8A1G1	UniRef100_Q8A1G1	Bacteria	Bacteroides thetaiotaomicron VPI-5482	unknown	Bacteroidia	Bacteroidales	Bacteroidaceae	Bacteroides	Bacteroides thetaiotaomicron	Bacteroides thetaiotaomicron VPI-5482	5	0	0	0	1	1	3	0	0	0	0	0	0	0	0	0	0	0	0	0	0	0	0	0	0	0	0	0	0	0	0
Meta-Protein 2764	BLAST_BGLF_ASPOR Probable beta-glucosidase F OS=Aspergillus oryzae (strain ATCC 42149 / RIB 40) GN=bglF PE=3 SV=1_Q2UN12	Carbohydrate metabolism;Cellulose degradation;Complete proteome;Glycoprotein;Glycosidase;Hydrolase;Polysaccharide degradation;Reference proteome;Secreted;Signal;	;3.2.1.21;;	3.2.1.21;	;;;	;	UniRef50_Q5B6C6	UniRef90_Q2UN12	UniRef100_Q2UN12	Eukaryota	Fungi	unknown	Eurotiomycetes	Eurotiales	Trichocomaceae	Aspergillus	Aspergillus oryzae	Aspergillus oryzae RIB40	7	3	2	0	0	0	1	0	1	0	0	0	0	0	0	0	0	0	0	0	0	0	0	0	0	0	0	0	0	0	0
Meta-Protein 5084	BLAST_OMPB3_NEIMI Major outer membrane protein P.IB OS=Neisseria meningitidis serogroup B GN=porB PE=3 SV=1_P30688	Cell outer membrane;Ion transport;Membrane;Porin;Signal;Transmembrane;Transmembrane beta strand;Transport;	;;;	;	;;;	;	UniRef50_P30690	UniRef90_P30690	EMPTY	Bacteria	Neisseria meningitidis serogroup B	unknown	Betaproteobacteria	Neisseriales	Neisseriaceae	Neisseria	Neisseria meningitidis	Neisseria meningitidis serogroup B	4	0	0	0	0	0	0	0	0	0	0	0	0	0	0	0	0	0	0	0	0	0	0	0	0	0	0	0	0	0	0
Meta-Protein 1422	BLAST_FAHD1_HUMAN Acylpyruvase FAHD1, mitochondrial OS=Homo sapiens GN=FAHD1 PE=1 SV=2_Q6P587	3D-structure;Acetylation;Alternative splicing;Calcium;Complete proteome;Cytoplasm;Hydrolase;Lyase;Magnesium;Metal-binding;Mitochondrion;Phosphoprotein;Polymorphism;Reference proteome;Transit peptide;	;3.7.1.5;4.1.1.3;;	3.7.1.5;4.1.1.3;	;K01557;;	K01557;	UniRef50_Q6P587	UniRef90_Q6P587	UniRef100_Q6P587	Eukaryota	Metazoa	unknown	Mammalia	Primates	Hominidae	Homo	Homo sapiens	Homo sapiens	1	0	0	0	0	0	0	0	0	0	0	0	0	0	0	0	0	0	0	1	0	0	0	0	0	0	0	0	0	0	0
Meta-Protein 480	BLAST_UGPB_SALCH sn-glycerol-3-phosphate-binding periplasmic protein UgpB OS=Salmonella choleraesuis (strain SC-B67) GN=ugpB PE=3 SV=1_Q57IS0	Complete proteome;Periplasm;Reference proteome;Signal;Transport;	;;;	;	;K05813;;	K05813;	UniRef50_P0AG81	UniRef90_P0AG81	UniRef100_A1AGY4	Bacteria	Enterobacteriaceae	unknown	Gammaproteobacteria	Enterobacteriales	Enterobacteriaceae	Enterobacteriaceae	Enterobacteriaceae	Enterobacteriaceae	48	6	7	7	5	5	3	2	3	3	3	2	1	0	0	0	0	0	1	0	0	0	0	0	0	0	0	0	0	0	0
Meta-Protein 3469	Metagenome unknown		;;		;;					Uncategorized	Uncategorized	unknown	Uncategorized	Uncategorized	Uncategorized	Uncategorized	Uncategorized	Uncategorized	1	0	0	1	0	0	0	0	0	0	0	0	0	0	0	0	0	0	0	0	0	0	0	0	0	0	0	0	0	0	0
Meta-Protein 12	BLAST_RS11_MOOTA 30S ribosomal protein S11 OS=Moorella thermoacetica (strain ATCC 39073 / JCM 9320) GN=rpsK PE=3 SV=1_Q2RFS4	Complete proteome;RNA-binding;Reference proteome;Ribonucleoprotein;Ribosomal protein;rRNA-binding;	;;;	;	;K02948;;	K02948;	EMPTY	EMPTY	EMPTY	Bacteria	Firmicutes	unknown	Firmicutes	Firmicutes	Firmicutes	Firmicutes	Firmicutes	Firmicutes	1	1	0	0	0	0	0	0	0	0	0	0	0	0	0	0	0	0	0	0	0	0	0	0	0	0	0	0	0	0	0
Meta-Protein 4184	Metagenome unknown		;;		;;					Uncategorized	Uncategorized	unknown	Uncategorized	Uncategorized	Uncategorized	Uncategorized	Uncategorized	Uncategorized	3	0	0	0	0	0	0	0	0	0	2	0	1	0	0	0	0	0	0	0	0	0	0	0	0	0	0	0	0	0	0
Meta-Protein 2810	Metagenome unknown		;;		;;					Uncategorized	Uncategorized	unknown	Uncategorized	Uncategorized	Uncategorized	Uncategorized	Uncategorized	Uncategorized	60	12	10	4	9	8	2	3	2	1	2	2	1	1	2	0	1	0	0	0	0	0	0	0	0	0	0	0	0	0	0
Meta-Protein 4340	Metagenome Unknown		;;		;;					Uncategorized	Uncategorized	unknown	Uncategorized	Uncategorized	Uncategorized	Uncategorized	Uncategorized	Uncategorized	9	0	0	0	0	0	0	0	0	0	0	0	0	0	0	0	0	0	0	2	2	0	0	1	3	0	0	0	0	0	1
Meta-Protein 2246	BLAST_RHAA_BACTN L-rhamnose isomerase OS=Bacteroides thetaiotaomicron (strain ATCC 29148 / DSM 2079 / NCTC 10582 / E50 / VPI-5482) GN=rhaA PE=3 SV=1_Q8A1A2	Complete proteome;Cytoplasm;Isomerase;Manganese;Metal-binding;Reference proteome;Rhamnose metabolism;	;5.3.1.14;;	5.3.1.14;	;K01813;;	K01813;	UniRef50_Q8A1A2	UniRef90_Q8A1A2	UniRef100_Q8A1A2	Bacteria	Bacteroides thetaiotaomicron VPI-5482	unknown	Bacteroidia	Bacteroidales	Bacteroidaceae	Bacteroides	Bacteroides thetaiotaomicron	Bacteroides thetaiotaomicron VPI-5482	4	0	0	0	0	0	0	0	0	0	0	0	0	0	0	0	0	0	0	0	0	0	0	0	1	2	0	1	0	0	0
Meta-Protein 4571	BLAST_ACP_BACV8 Acyl carrier protein OS=Bacteroides vulgatus (strain ATCC 8482 / DSM 1447 / JCM 5826 / NBRC 14291 / NCTC 11154) GN=acpP PE=3 SV=1_A6KZ78	Complete proteome;Cytoplasm;Fatty acid biosynthesis;Fatty acid metabolism;Lipid biosynthesis;Lipid metabolism;Phosphopantetheine;Phosphoprotein;Reference proteome;	;;;	;	;K02078;;	K02078;	EMPTY	EMPTY	EMPTY	Bacteria	Bacteroides	unknown	Bacteroidia	Bacteroidales	Bacteroidaceae	Bacteroides	Bacteroides	Bacteroides	9	0	0	0	0	0	0	0	0	0	0	0	0	0	0	0	0	0	0	0	0	2	2	4	0	0	0	0	0	0	0
Meta-Protein 1517	BLAST_ENTK_HUMAN Enteropeptidase OS=Homo sapiens GN=TMPRSS15 PE=1 SV=3_P98073	3D-structure;Alternative splicing;Complete proteome;Direct protein sequencing;Disulfide bond;Glycoprotein;Hydrolase;Lipoprotein;Membrane;Myristate;Polymorphism;Protease;Reference proteome;Repeat;Serine protease;Signal-anchor;Transmembrane;Transmembrane helix;Zymogen;	;3.4.21.9;;	3.4.21.9;	;K01316;;	K01316;	UniRef50_P98072	UniRef90_P98072	UniRef100_P98072	Eukaryota	Metazoa	unknown	Mammalia	Eutheria	Eutheria	Eutheria	Eutheria	Eutheria	28	0	0	0	0	0	0	0	0	0	0	0	0	0	0	0	0	0	0	6	5	1	2	0	2	1	4	1	1	0	1
Meta-Protein 2090	BLAST_BEPE_BRUSU Efflux pump membrane transporter BepE OS=Brucella suis biovar 1 (strain 1330) GN=bepE PE=1 SV=1_Q8G2M6	Antibiotic resistance;Cell inner membrane;Cell membrane;Complete proteome;Membrane;Transmembrane;Transmembrane helix;Transport;	;;;	;	;K18138;;	K18138;	UniRef50_Q8G2M6	UniRef90_Q8G2M6	UniRef100_Q8G2M6	Bacteria	Brucella suis 1330	unknown	Alphaproteobacteria	Rhizobiales	Brucellaceae	Brucella	Brucella suis	Brucella suis 1330	1	0	0	0	0	0	0	0	0	0	0	0	0	0	0	0	0	0	0	0	0	0	1	0	0	0	0	0	0	0	0
Meta-Protein 1856	BLAST_TFF3_HUMAN Trefoil factor 3 OS=Homo sapiens GN=TFF3 PE=1 SV=1_Q07654	3D-structure;Complete proteome;Cytoplasm;Direct protein sequencing;Disulfide bond;Extracellular matrix;Reference proteome;Secreted;Signal;	;;;	;	;;;	;	UniRef50_Q07654	UniRef90_Q07654	UniRef100_Q07654	Eukaryota	Metazoa	unknown	Mammalia	Primates	Hominidae	Homo	Homo sapiens	Homo sapiens	10	0	0	0	0	0	0	0	0	0	0	0	0	0	0	0	0	0	0	0	2	0	0	1	3	3	0	1	0	0	0
Meta-Protein 2831	GL84_ORYSJ Germin-like protein 8-4 OS=Oryza sativa subsp. japonica GN=GER1 PE=2 SV=1	Apoplast;Complete proteome;Disulfide bond;Glycoprotein;Manganese;Metal-binding;Reference proteome;Secreted;Signal;	;;;	;	;;;	;	UniRef50_P92996	UniRef90_Q6YZZ7	UniRef100_Q6YZZ6	Eukaryota	Viridiplantae	unknown	Liliopsida	Poales	Poaceae	Oryza	Oryza sativa	Oryza sativa Japonica Group	51	13	9	5	4	6	3	3	1	1	6	0	0	0	0	0	0	0	0	0	0	0	0	0	0	0	0	0	0	0	0
Meta-Protein 300	Metagenome unknown		;;		;;					Uncategorized	Uncategorized	unknown	Uncategorized	Uncategorized	Uncategorized	Uncategorized	Uncategorized	Uncategorized	158	1	1	0	0	0	0	0	0	0	0	0	0	0	0	0	0	0	0	12	10	5	11	13	11	23	23	11	1	2	5
Meta-Protein 612	BLAST_Y1477_THEKO MEMO1 family protein TK1477 OS=Thermococcus kodakarensis (strain ATCC BAA-918 / JCM 12380 / KOD1) GN=TK1477 PE=3 SV=1_Q5JJC3	Complete proteome;Reference proteome;	;;;	;	;K06990;;	K06990;	UniRef50_Q5JJC3	EMPTY	EMPTY	Archaea	Thermococcaceae	unknown	Thermococci	Thermococcales	Thermococcaceae	Thermococcaceae	Thermococcaceae	Thermococcaceae	1	1	0	0	0	0	0	0	0	0	0	0	0	0	0	0	0	0	0	0	0	0	0	0	0	0	0	0	0	0	0
Meta-Protein 1513	BLAST_FLA_BACSU Flagellin OS=Bacillus subtilis (strain 168) GN=hag PE=1 SV=2_P02968	Bacterial flagellum;Cell wall;Complete proteome;Direct protein sequencing;Reference proteome;Secreted;	;;;	;	;;K02406;;	;K02406;	UniRef50_P80583	UniRef90_P80583	UniRef100_P80583	Bacteria	Firmicutes	unknown	Firmicutes	Firmicutes	Firmicutes	Firmicutes	Firmicutes	Firmicutes	3	0	0	0	0	0	0	0	0	0	0	0	0	0	0	0	0	0	0	3	0	0	0	0	0	0	0	0	0	0	0
Meta-Protein 249	BLAST_ANCA_CLOTH Cellulosome-anchoring protein OS=Clostridium thermocellum (strain ATCC 27405 / DSM 1237 / NBRC 103400 / NCIMB 10682 / NRRL B-4536 / VPI 7372) GN=ancA PE=1 SV=1_Q06848	3D-structure;Carbohydrate metabolism;Cell outer membrane;Cell wall;Cellulose degradation;Coiled coil;Complete proteome;Direct protein sequencing;Membrane;Polysaccharide degradation;Reference proteome;Repeat;S-layer;Secreted;Signal;Transmembrane;Transmembrane helix;	;;;	;	;;;	;	EMPTY	EMPTY	EMPTY	Bacteria	Bacteria	unknown	Bacteria	Bacteria	Bacteria	Bacteria	Bacteria	Bacteria	626	65	71	69	65	57	26	68	83	66	9	6	8	4	3	1	9	7	9	0	0	0	0	0	0	0	0	0	0	0	0
Meta-Protein 3929	BLAST_FABG_STAAR 3-oxoacyl-[acyl-carrier-protein] reductase FabG OS=Staphylococcus aureus (strain MRSA252) GN=fabG PE=3 SV=1_Q6GHK4	3D-structure;Complete proteome;Fatty acid biosynthesis;Fatty acid metabolism;Lipid biosynthesis;Lipid metabolism;NADP;Oxidoreductase;	;1.1.1.100;;	1.1.1.100;	;K00059;;	K00059;	UniRef50_Q5HGK2	UniRef90_Q5HGK2	UniRef100_Q5HGK2	Bacteria	Staphylococcus aureus subsp. aureus	unknown	Bacilli	Bacillales	Staphylococcaceae	Staphylococcus	Staphylococcus aureus	Staphylococcus aureus subsp. aureus	1	0	0	0	0	0	1	0	0	0	0	0	0	0	0	0	0	0	0	0	0	0	0	0	0	0	0	0	0	0	0
Meta-Protein 527	Metagenome unknown		;;		;;					Uncategorized	Uncategorized	unknown	Uncategorized	Uncategorized	Uncategorized	Uncategorized	Uncategorized	Uncategorized	6	2	2	2	0	0	0	0	0	0	0	0	0	0	0	0	0	0	0	0	0	0	0	0	0	0	0	0	0	0	0
Meta-Protein 3496	Metagenome unknown		;;		;;					Uncategorized	Uncategorized	unknown	Uncategorized	Uncategorized	Uncategorized	Uncategorized	Uncategorized	Uncategorized	1	0	0	1	0	0	0	0	0	0	0	0	0	0	0	0	0	0	0	0	0	0	0	0	0	0	0	0	0	0	0
Meta-Protein 4367	BLAST_SYG_LEPIC Glycine--tRNA ligase OS=Leptospira interrogans serogroup Icterohaemorrhagiae serovar copenhageni (strain Fiocruz L1-130) GN=glyQS PE=3 SV=1_Q72PW7	ATP-binding;Aminoacyl-tRNA synthetase;Complete proteome;Cytoplasm;Ligase;Nucleotide-binding;Protein biosynthesis;	;6.1.1.14;;	6.1.1.14;	;K01880;;	K01880;	UniRef50_Q8F6C0	UniRef90_Q8F6C0	UniRef100_Q72PW7	Bacteria	Leptospira interrogans serovar Copenhageni str. Fiocruz L1-130	unknown	Spirochaetia	Spirochaetales	Leptospiraceae	Leptospira	Leptospira interrogans serovar Copenhageni str. Fiocruz L1-130	Leptospira interrogans serovar Copenhageni	4	0	0	0	0	0	0	0	0	0	0	0	0	0	0	0	0	0	0	1	2	0	0	0	1	0	0	0	0	0	0
Meta-Protein 156	BLAST_TMPC_TREPA Membrane lipoprotein TmpC OS=Treponema pallidum (strain Nichols) GN=tmpC PE=1 SV=2_P29724	3D-structure;Cell membrane;Complete proteome;Direct protein sequencing;Lipoprotein;Membrane;Palmitate;Reference proteome;Signal;Transport;	;;;	;	;K07335;;	K07335;	UniRef50_P29724	UniRef90_P29724	UniRef100_P29724	Bacteria	Treponema pallidum subsp. pallidum str. Nichols	unknown	Spirochaetia	Spirochaetales	Spirochaetaceae	Treponema	Treponema pallidum subsp. pallidum str. Nichols	Treponema pallidum subsp. pallidum	132	18	17	12	11	10	9	1	0	1	12	11	9	2	3	3	5	5	3	0	0	0	0	0	0	0	0	0	0	0	0
Meta-Protein 4801	Metagenome Unknown		;;		;;					Uncategorized	Uncategorized	unknown	Uncategorized	Uncategorized	Uncategorized	Uncategorized	Uncategorized	Uncategorized	26	0	0	0	0	0	0	0	0	0	0	0	0	0	0	0	0	0	0	0	0	0	0	0	0	9	6	5	0	0	0
Meta-Protein 3168	Metagenome unknown		;;		;;					Uncategorized	Uncategorized	unknown	Uncategorized	Uncategorized	Uncategorized	Uncategorized	Uncategorized	Uncategorized	1	1	0	0	0	0	0	0	0	0	0	0	0	0	0	0	0	0	0	0	0	0	0	0	0	0	0	0	0	0	0
Meta-Protein 3165	BLAST_ODBB_BACSU 2-oxoisovalerate dehydrogenase subunit beta OS=Bacillus subtilis (strain 168) GN=bfmBAB PE=1 SV=1_P37941	Complete proteome;Direct protein sequencing;Oxidoreductase;Reference proteome;Thiamine pyrophosphate;	;1.2.4.4;;	1.2.4.4;	;K00167;;	K00167;	UniRef50_P37941	UniRef90_P37941	UniRef100_P37941	Bacteria	Bacillus subtilis subsp. subtilis str. 168	unknown	Bacilli	Bacillales	Bacillaceae	Bacillus	Bacillus subtilis subsp. subtilis str. 168	Bacillus subtilis subsp. subtilis	1	1	0	0	0	0	0	0	0	0	0	0	0	0	0	0	0	0	0	0	0	0	0	0	0	0	0	0	0	0	0
Meta-Protein 2162	BLAST_GALT_BUTFI Galactose-1-phosphate uridylyltransferase (Fragment) OS=Butyrivibrio fibrisolvens GN=galT PE=3 SV=1_P45981	Carbohydrate metabolism;Complete proteome;Cytoplasm;Galactose metabolism;Nucleotidyltransferase;Reference proteome;Transferase;	;2.7.7.12;;	2.7.7.12;	;;K00965;;	;K00965;	UniRef50_P45981	UniRef90_P45981	UniRef100_P45981	Bacteria	Bacteria	unknown	Bacteria	Bacteria	Bacteria	Bacteria	Bacteria	Bacteria	1	0	0	0	0	0	0	0	0	0	0	0	0	0	0	0	0	0	0	0	0	0	1	0	0	0	0	0	0	0	0
Meta-Protein 875	BLAST_MDH_DEIGD Malate dehydrogenase OS=Deinococcus geothermalis (strain DSM 11300) GN=mdh PE=3 SV=1_Q1IWC9	Complete proteome;Mitochondrion;NAD;Oxidoreductase;Reference proteome;Transit peptide;Tricarboxylic acid cycle;	;1.1.1.37;;	1.1.1.37;	;K00024;K00026;;	K00024;K00026;	EMPTY	EMPTY	EMPTY	cellular organisms	cellular organisms	unknown	cellular organisms	cellular organisms	cellular organisms	cellular organisms	cellular organisms	cellular organisms	1	0	0	1	0	0	0	0	0	0	0	0	0	0	0	0	0	0	0	0	0	0	0	0	0	0	0	0	0	0	0
Meta-Protein 3663	BLAST_MALE_PYRFU Maltotriose-binding protein OS=Pyrococcus furiosus (strain ATCC 43587 / DSM 3638 / JCM 8422 / Vc1) GN=malE PE=1 SV=1_P58300	3D-structure;Complete proteome;Reference proteome;Signal;Sugar transport;Transport;	;;;	;	;K15770;;	K15770;	UniRef50_P58300	UniRef90_P58300	UniRef100_P58300	Archaea	Pyrococcus furiosus DSM 3638	unknown	Thermococci	Thermococcales	Thermococcaceae	Pyrococcus	Pyrococcus furiosus	Pyrococcus furiosus DSM 3638	4	0	0	0	2	0	1	1	0	0	0	0	0	0	0	0	0	0	0	0	0	0	0	0	0	0	0	0	0	0	0
Meta-Protein 1813	BLAST_CSPS_STRTR Cold shock protein CspSt (Fragment) OS=Streptococcus thermophilus PE=1 SV=1_P81622	Activator;Cytoplasm;DNA-binding;Direct protein sequencing;Stress response;Transcription;Transcription regulation;	;;;	;	;;;	;	UniRef50_P81622	UniRef90_P81622	UniRef100_P81622	Bacteria	Streptococcus thermophilus	unknown	Bacilli	Lactobacillales	Streptococcaceae	Streptococcus	Streptococcus thermophilus	Streptococcus thermophilus	9	0	0	0	0	0	0	0	0	0	0	0	0	0	0	0	0	0	0	0	1	0	0	0	1	1	0	0	3	1	2
Meta-Protein 1950	Metagenome Unknown		;;		;;					Uncategorized	Uncategorized	unknown	Uncategorized	Uncategorized	Uncategorized	Uncategorized	Uncategorized	Uncategorized	108	0	0	0	0	0	0	0	0	0	0	0	0	0	0	0	0	0	0	0	0	24	28	23	0	0	0	0	0	0	0
Meta-Protein 72	Metagenome unknown	3D-structure;Cell membrane;Complete proteome;Glycoprotein;Lipoprotein;Membrane;Palmitate;Reference proteome;Signal;Sugar transport;Transport;	;;;	;	;K02027;K17234;;	K02027;K17234;	EMPTY	EMPTY	EMPTY	cellular organisms	cellular organisms	unknown	cellular organisms	cellular organisms	cellular organisms	cellular organisms	cellular organisms	cellular organisms	10	3	3	3	0	0	0	0	0	0	0	0	1	0	0	0	0	0	0	0	0	0	0	0	0	0	0	0	0	0	0
Meta-Protein 4254	GLRX4_YEAST Monothiol glutaredoxin-4 OS=Saccharomyces cerevisiae (strain ATCC 204508 / S288c) GN=GRX4 PE=1 SV=1	2Fe-2S;Complete proteome;Iron;Iron-sulfur;Metal-binding;Redox-active center;Reference proteome;	;;;	;	;;;	;	UniRef50_P32642	UniRef90_P32642	UniRef100_P32642	Eukaryota	Fungi	unknown	Saccharomycetes	Saccharomycetales	Saccharomycetaceae	Saccharomyces	Saccharomyces cerevisiae	Saccharomyces cerevisiae S288c	1	0	0	0	0	0	0	0	0	0	0	1	0	0	0	0	0	0	0	0	0	0	0	0	0	0	0	0	0	0	0
Meta-Protein 4831	BLAST_IOLE_CLOB8 Inosose dehydratase OS=Clostridium beijerinckii (strain ATCC 51743 / NCIMB 8052) GN=iolE PE=3 SV=1_A6M225	Cobalt;Complete proteome;Lyase;Manganese;Reference proteome;	;4.2.1.44;;	4.2.1.44;	;K03335;;	K03335;	UniRef50_A4IPB5	UniRef90_A6M225	UniRef100_A6M225	Bacteria	Clostridium beijerinckii NCIMB 8052	unknown	Clostridia	Clostridiales	Clostridiaceae	Clostridium	Clostridium beijerinckii	Clostridium beijerinckii NCIMB 8052	1	0	0	0	0	0	0	0	0	0	0	0	0	0	0	0	0	0	0	0	0	0	0	0	0	1	0	0	0	0	0
Meta-Protein 1072	BLAST_NHAC_BACPE Na(+)/H(+) antiporter NhaC OS=Bacillus pseudofirmus (strain OF4) GN=nhaC PE=3 SV=3_P27611	Antiport;Cell membrane;Complete proteome;Ion transport;Membrane;Reference proteome;Sodium;Sodium transport;Transmembrane;Transmembrane helix;Transport;	;;;	;	;K03315;;	K03315;	UniRef50_P27611	UniRef90_P27611	UniRef100_P27611	Bacteria	Bacillus pseudofirmus OF4	unknown	Bacilli	Bacillales	Bacillaceae	Bacillus	Bacillus pseudofirmus	Bacillus pseudofirmus OF4	1	0	0	0	0	0	1	0	0	0	0	0	0	0	0	0	0	0	0	0	0	0	0	0	0	0	0	0	0	0	0
Meta-Protein 3437	BLAST_SOR_THEMA Putative superoxide reductase OS=Thermotoga maritima (strain ATCC 43589 / MSB8 / DSM 3109 / JCM 10099) GN=TM_0658 PE=1 SV=1_Q9WZC6	3D-structure;Complete proteome;Electron transport;Iron;Metal-binding;Oxidoreductase;Reference proteome;Transport;	;1.15.1.2;;	1.15.1.2;	;K05919;;	K05919;	UniRef50_Q9WZC6	UniRef90_Q9WZC6	UniRef100_Q9WZC6	Bacteria	Thermotoga maritima MSB8	unknown	Thermotogae	Thermotogales	Thermotogaceae	Thermotoga	Thermotoga maritima	Thermotoga maritima MSB8	2	0	1	1	0	0	0	0	0	0	0	0	0	0	0	0	0	0	0	0	0	0	0	0	0	0	0	0	0	0	0
Meta-Protein 733	BLAST_THIO_STAAU Thioredoxin OS=Staphylococcus aureus GN=trxA PE=1 SV=1_P0A0K6	3D-structure;ATP-binding;Aminoacyl-tRNA synthetase;Complete proteome;Disulfide bond;Electron transport;Ligase;Nucleotide-binding;Protein biosynthesis;Redox-active center;Reference proteome;Transport;	;;6.1.1.2;;	;6.1.1.2;	;;K01867;K03671;;	;K01867;K03671;	EMPTY	EMPTY	UniRef100_Q9RVD6	Bacteria	Bacteria	unknown	Bacteria	Bacteria	Bacteria	Bacteria	Bacteria	Bacteria	1	1	0	0	0	0	0	0	0	0	0	0	0	0	0	0	0	0	0	0	0	0	0	0	0	0	0	0	0	0	0
Meta-Protein 4353	BLAST_SECF_ANATU Protein translocase subunit SecF OS=Anaerolinea thermophila (strain DSM 14523 / JCM 11388 / NBRC 100420 / UNI-1) GN=secF PE=3 SV=1_E8N5I9	Cell membrane;Complete proteome;Membrane;Protein transport;Reference proteome;Translocation;Transmembrane;Transmembrane helix;Transport;	;;;	;	;K03074;;	K03074;	UniRef50_E8N5I9	UniRef90_E8N5I9	UniRef100_E8N5I9	Bacteria	Anaerolinea thermophila UNI-1	unknown	Anaerolineae	Anaerolineales	Anaerolineaceae	Anaerolinea	Anaerolinea thermophila	Anaerolinea thermophila UNI-1	2	0	0	0	0	0	0	0	0	0	0	0	0	0	0	0	0	0	0	1	0	0	0	0	1	0	0	0	0	0	0
Meta-Protein 491	BLAST_CH60_CLOTH 60 kDa chaperonin OS=Clostridium thermocellum (strain ATCC 27405 / DSM 1237 / NBRC 103400 / NCIMB 10682 / NRRL B-4536 / VPI 7372) GN=groL PE=1 SV=3_P48212	ATP-binding;Chaperone;Complete proteome;Cytoplasm;Direct protein sequencing;Nucleotide-binding;Reference proteome;	;;;	;	;;K04077;;	;K04077;	UniRef50_Q9C667	UniRef90_P48212	UniRef100_P48212	Bacteria	Bacteria	unknown	Bacteria	Bacteria	Bacteria	Bacteria	Bacteria	Bacteria	34	4	3	2	1	1	1	4	0	1	2	0	0	0	0	0	0	0	0	1	1	0	1	0	2	5	4	0	0	0	0
Meta-Protein 2387	Metagenome Unknown		;;		;;					Uncategorized	Uncategorized	unknown	Uncategorized	Uncategorized	Uncategorized	Uncategorized	Uncategorized	Uncategorized	1	0	0	0	0	0	0	0	0	0	0	0	0	0	0	0	0	0	0	0	0	0	0	0	0	1	0	0	0	0	0
Meta-Protein 5200	Metagenome unknown		;;		;;					Uncategorized	Uncategorized	unknown	Uncategorized	Uncategorized	Uncategorized	Uncategorized	Uncategorized	Uncategorized	1	0	0	0	0	0	0	0	0	0	0	0	0	0	0	0	0	0	0	0	0	0	0	0	0	0	0	0	0	0	0
Meta-Protein 3410	BLAST_YLQH_BACSU Uncharacterized protein YlqH OS=Bacillus subtilis (strain 168) GN=ylqH PE=4 SV=1_O34867	Complete proteome;Reference proteome;	;;;	;	;K04061;;	K04061;	UniRef50_O34867	UniRef90_O34867	UniRef100_O34867	Bacteria	Bacillus subtilis subsp. subtilis str. 168	unknown	Bacilli	Bacillales	Bacillaceae	Bacillus	Bacillus subtilis subsp. subtilis str. 168	Bacillus subtilis subsp. subtilis	1	0	1	0	0	0	0	0	0	0	0	0	0	0	0	0	0	0	0	0	0	0	0	0	0	0	0	0	0	0	0
Meta-Protein 2341	BLAST_RL17_PARD8 50S ribosomal protein L17 OS=Parabacteroides distasonis (strain ATCC 8503 / DSM 20701 / CIP 104284 / JCM 5825 / NCTC 11152) GN=rplQ PE=3 SV=1_A6LEG4	Complete proteome;Reference proteome;Ribonucleoprotein;Ribosomal protein;	;;;	;	;K02879;;	K02879;	UniRef50_A6KYG9	UniRef90_A6KYG9	UniRef100_A6KYG9	Bacteria	Bacteroidales	unknown	Bacteroidia	Bacteroidales	Bacteroidales	Bacteroidales	Bacteroidales	Bacteroidales	8	0	0	0	0	0	0	0	0	0	0	0	0	0	0	0	0	0	0	0	0	0	0	0	0	3	1	3	0	0	0
Meta-Protein 4515	BLAST_NIFJ_KLEPN Pyruvate-flavodoxin oxidoreductase OS=Klebsiella pneumoniae GN=nifJ PE=3 SV=2_P03833	4Fe-4S;Electron transport;Iron;Iron-sulfur;Metal-binding;Nitrogen fixation;Oxidoreductase;Repeat;Transport;	;1.2.7.-;;	1.2.7.-;	;;;	;	UniRef50_P03833	UniRef90_P03833	UniRef100_P03833	Bacteria	Klebsiella pneumoniae	unknown	Gammaproteobacteria	Enterobacteriales	Enterobacteriaceae	Klebsiella	Klebsiella pneumoniae	Klebsiella pneumoniae	1	0	0	0	0	0	0	0	0	0	0	0	0	0	0	0	0	0	0	0	1	0	0	0	0	0	0	0	0	0	0
Meta-Protein 2368	BLAST_PCCB_BACSU Putative propionyl-CoA carboxylase beta chain OS=Bacillus subtilis (strain 168) GN=yqjD PE=3 SV=2_P54541	3D-structure;ATP-binding;Complete proteome;Ligase;Lyase;Nucleotide-binding;Reference proteome;	;6.4.1.3;;	6.4.1.3;	;K01966;K19312;;	K01966;K19312;	EMPTY	UniRef90_P54541	UniRef100_P54541	cellular organisms	cellular organisms	unknown	cellular organisms	cellular organisms	cellular organisms	cellular organisms	cellular organisms	cellular organisms	21	0	0	0	0	0	0	0	0	0	0	0	0	0	0	0	0	0	0	0	0	0	0	0	0	6	9	2	0	0	0
Meta-Protein 797	BLAST_SUMF1_HUMAN Sulfatase-modifying factor 1 OS=Homo sapiens GN=SUMF1 PE=1 SV=3_Q8NBK3	3D-structure;Alternative splicing;Calcium;Complete proteome;Direct protein sequencing;Disease mutation;Disulfide bond;Endoplasmic reticulum;Glycoprotein;Ichthyosis;Leukodystrophy;Metachromatic leukodystrophy;Metal-binding;Mucopolysaccharidosis;Oxidoreductase;Polymorphism;Redox-active center;Reference proteome;Signal;	;;1.8.99.-;;	;1.8.99.-;	;;K13444;;	;K13444;	UniRef50_Q58CP2	UniRef90_Q58CP2	UniRef100_Q58CP2	Eukaryota	Metazoa	unknown	Mammalia	Mammalia	Mammalia	Mammalia	Mammalia	Mammalia	35	0	1	0	5	6	6	5	7	5	0	0	0	0	0	0	0	0	0	0	0	0	0	0	0	0	0	0	0	0	0
Meta-Protein 814	BLAST_FLGG_BACSU Flagellar basal-body rod protein FlgG OS=Bacillus subtilis (strain 168) GN=flgG PE=3 SV=2_P23446	Bacterial flagellum;Complete proteome;Reference proteome;	;;;	;	;;K02390;;	;K02390;	EMPTY	EMPTY	EMPTY	Bacteria	Bacteria	unknown	Bacteria	Bacteria	Bacteria	Bacteria	Bacteria	Bacteria	4	0	1	1	0	0	0	0	0	0	1	1	0	0	0	0	0	0	0	0	0	0	0	0	0	0	0	0	0	0	0
Meta-Protein 2887	Metagenome unknown		;;		;;					Uncategorized	Uncategorized	unknown	Uncategorized	Uncategorized	Uncategorized	Uncategorized	Uncategorized	Uncategorized	34	3	4	4	4	2	0	4	4	3	5	0	0	0	0	0	0	1	0	0	0	0	0	0	0	0	0	0	0	0	0
Meta-Protein 2948	BLAST_ALSB_ECOLI D-allose-binding periplasmic protein OS=Escherichia coli (strain K12) GN=alsB PE=1 SV=1_P39265	3D-structure;Complete proteome;Periplasm;Reference proteome;Signal;Sugar transport;Transport;	;;;	;	;K10549;;	K10549;	UniRef50_P39265	UniRef90_P39265	UniRef100_P39265	Bacteria	Escherichia coli K-12	unknown	Gammaproteobacteria	Enterobacteriales	Enterobacteriaceae	Escherichia	Escherichia coli	Escherichia coli K-12	183	13	14	14	25	22	19	16	15	11	11	5	6	3	2	0	4	1	2	0	0	0	0	0	0	0	0	0	0	0	0
Meta-Protein 1728	BLAST_CDHR5_HUMAN Cadherin-related family member 5 OS=Homo sapiens GN=CDHR5 PE=1 SV=3_Q9HBB8	Alternative splicing;Calcium;Cell membrane;Cell projection;Complete proteome;Differentiation;Glycoprotein;Membrane;Phosphoprotein;Polymorphism;Reference proteome;Repeat;Signal;Transmembrane;Transmembrane helix;	;;;	;	;K16505;;	K16505;	UniRef50_Q9HBB8	UniRef90_Q9HBB8	UniRef100_Q9HBB8	Eukaryota	Metazoa	unknown	Mammalia	Primates	Hominidae	Homo	Homo sapiens	Homo sapiens	24	0	0	0	0	0	0	0	0	0	0	0	0	0	0	0	0	0	0	5	0	1	3	0	0	4	5	1	0	0	0
Meta-Protein 5029	RHO_RICBR Transcription termination factor Rho OS=Rickettsia bellii (strain RML369-C) GN=rho PE=3 SV=1	ATP-binding;Complete proteome;Helicase;Hydrolase;Nucleotide-binding;Reference proteome;RNA-binding;Transcription;Transcription regulation;Transcription termination;	;3.6.4.-;;	3.6.4.-;	;K03628;;	K03628;	UniRef50_Q9HTV1	UniRef90_Q68WL0	UniRef100_Q1RIJ6	Bacteria	Rickettsia bellii RML369-C	unknown	Alphaproteobacteria	Rickettsiales	Rickettsiaceae	Rickettsia	Rickettsia bellii	Rickettsia bellii RML369-C	1	0	0	0	0	0	0	0	0	0	0	0	0	0	0	0	0	0	0	0	0	0	0	0	0	0	0	0	0	0	0
Meta-Protein 3575	Metagenome unknown		;;		;;					Uncategorized	Uncategorized	unknown	Uncategorized	Uncategorized	Uncategorized	Uncategorized	Uncategorized	Uncategorized	3	0	0	0	1	1	1	0	0	0	0	0	0	0	0	0	0	0	0	0	0	0	0	0	0	0	0	0	0	0	0
Meta-Protein 3576	BLAST_MRP4_STRPY Fibrinogen- and Ig-binding protein OS=Streptococcus pyogenes GN=mrp4 PE=3 SV=1_P30141	Cell wall;IgG-binding protein;Peptidoglycan-anchor;Repeat;Secreted;Signal;	;;;	;	;;;	;	UniRef50_P30141	UniRef90_P30141	UniRef100_P30141	Bacteria	Streptococcus pyogenes	unknown	Bacilli	Lactobacillales	Streptococcaceae	Streptococcus	Streptococcus pyogenes	Streptococcus pyogenes	10	0	0	0	1	2	5	2	0	0	0	0	0	0	0	0	0	0	0	0	0	0	0	0	0	0	0	0	0	0	0
Meta-Protein 317	BLAST_Y2991_BRUA2 Putative binding protein BAB2_0491 OS=Brucella abortus (strain 2308) GN=BAB2_0491 PE=3 SV=1_Q2YKZ9	Complete proteome;Periplasm;Reference proteome;Signal;Transport;	;;;	;	;K02027;;	K02027;	UniRef50_Q578M8	UniRef90_Q578M8	UniRef100_Q578M8	Bacteria	Brucella	unknown	Alphaproteobacteria	Rhizobiales	Brucellaceae	Brucella	Brucella	Brucella	39	5	9	6	3	1	1	0	0	0	7	5	2	0	0	0	0	0	0	0	0	0	0	0	0	0	0	0	0	0	0
Meta-Protein 333	BLAST_BIOF_SYMTH 8-amino-7-oxononanoate synthase OS=Symbiobacterium thermophilum (strain T / IAM 14863) GN=STH1872 PE=3 SV=1_Q67N86	Acyltransferase;Alternative splicing;Biotin biosynthesis;Complete proteome;Phosphoprotein;Pyridoxal phosphate;Reference proteome;Transferase;	;;2.3.1.47;;	;2.3.1.47;	;;K00639;;	;K00639;	EMPTY	EMPTY	UniRef100_Q67N86	cellular organisms	cellular organisms	unknown	cellular organisms	cellular organisms	cellular organisms	cellular organisms	cellular organisms	cellular organisms	30	5	1	1	1	1	2	0	0	0	4	6	6	0	0	0	2	1	0	0	0	0	0	0	0	0	0	0	0	0	0
Meta-Protein 1978	BLAST_RRBR1_CLOAB Reverse rubrerythrin-1 OS=Clostridium acetobutylicum (strain ATCC 824 / DSM 792 / JCM 1419 / LMG 5710 / VKM B-1787) GN=rbr3A PE=1 SV=1_Q97D82	Complete proteome;Detoxification;Direct protein sequencing;Electron transport;Iron;Isomerase;Metal-binding;NAD;Oxidoreductase;Peroxidase;Pyridoxal phosphate;Reference proteome;Stress response;Transport;	;1.11.1.1;5.1.1.1;;	1.11.1.1;5.1.1.1;	;;K01775;;	;K01775;	UniRef50_Q97D83	UniRef90_Q97D83	UniRef100_Q97D82	Bacteria	Bacteria	unknown	Bacteria	Bacteria	Bacteria	Bacteria	Bacteria	Bacteria	9	0	0	0	0	0	0	0	0	0	0	0	0	0	0	0	0	0	0	0	0	1	2	0	0	1	0	1	0	0	0
Meta-Protein 2143	Metagenome Unknown		;;		;;					Uncategorized	Uncategorized	unknown	Uncategorized	Uncategorized	Uncategorized	Uncategorized	Uncategorized	Uncategorized	2	0	0	0	0	0	0	0	0	0	0	0	0	0	0	0	0	0	0	0	0	0	1	0	0	0	1	0	0	0	0
Meta-Protein 258	BLAST_LDH_CLOB6 L-lactate dehydrogenase OS=Clostridium botulinum (strain 657 / Type Ba4) GN=ldh PE=3 SV=1_C3KVF0	Cytoplasm;NAD;Oxidoreductase;Phosphoprotein;	;1.1.1.27;;	1.1.1.27;	;K00016;;	K00016;	UniRef50_Q0TUX8	UniRef90_A7GDK3	UniRef100_C3KVF0	Bacteria	Clostridium botulinum Ba4 str. 657	unknown	Clostridia	Clostridiales	Clostridiaceae	Clostridium	Clostridium botulinum Ba4 str. 657	Clostridium botulinum B	135	11	10	9	11	11	7	14	9	9	10	5	5	5	3	1	7	4	4	0	0	0	0	0	0	0	0	0	0	0	0
Meta-Protein 4524	BLAST_FINC_BOVIN Fibronectin OS=Bos taurus GN=FN1 PE=1 SV=4_P07589	3D-structure;Acute phase;Alternative splicing;Angiogenesis;Cell adhesion;Cell shape;Complete proteome;Direct protein sequencing;Disease mutation;Disulfide bond;Extracellular matrix;Glycoprotein;Heparin-binding;Isopeptide bond;Oxidation;Phosphoprotein;Polymorphism;Pyrrolidone carboxylic acid;Reference proteome;Repeat;Secreted;Signal;Sulfation;	;;;	;	;;K05717;;	;K05717;	EMPTY	EMPTY	EMPTY	Eukaryota	Metazoa	unknown	Mammalia	Eutheria	Eutheria	Eutheria	Eutheria	Eutheria	5	0	0	0	0	0	0	0	0	0	0	0	0	0	0	0	0	0	0	0	0	2	2	1	0	0	0	0	0	0	0
Meta-Protein 749	RIMP_ACISJ Ribosome maturation factor RimP OS=Acidovorax sp. (strain JS42) GN=rimP PE=3 SV=2	Complete proteome;Cytoplasm;Reference proteome;Ribosome biogenesis;	;;;	;	;K09748;;	K09748;	UniRef50_A1W8Z6	UniRef90_A1W8Z6	EMPTY	Bacteria	Acidovorax	unknown	Betaproteobacteria	Burkholderiales	Comamonadaceae	Acidovorax	Acidovorax	Acidovorax	1	1	0	0	0	0	0	0	0	0	0	0	0	0	0	0	0	0	0	0	0	0	0	0	0	0	0	0	0	0	0
Meta-Protein 1892	Metagenome Unknown	Cell cycle;Cell division;Chaperone;Complete proteome;Cytoplasm;Isomerase;Reference proteome;Rotamase;	;5.2.1.8;;	5.2.1.8;	;K03545;;	K03545;	UniRef50_Q04TR5	UniRef90_Q72SG7	UniRef100_Q72SG7	Bacteria	Bacteria	unknown	Bacteria	Bacteria	Bacteria	Bacteria	Bacteria	Bacteria	5	0	0	0	0	0	0	0	0	0	0	0	0	0	0	0	0	0	0	0	0	1	4	0	0	0	0	0	0	0	0
Meta-Protein 1105	CH60_DESPS 60 kDa chaperonin OS=Desulfotalea psychrophila (strain LSv54 / DSM 12343) GN=groL PE=3 SV=1	ATP-binding;Chaperone;Complete proteome;Cytoplasm;Nucleotide-binding;Reference proteome;	;;;	;	;;K04077;;	;K04077;	EMPTY	EMPTY	EMPTY	Bacteria	Bacteria	unknown	Bacteria	Bacteria	Bacteria	Bacteria	Bacteria	Bacteria	1	0	0	0	0	0	1	0	0	0	0	0	0	0	0	0	0	0	0	0	0	0	0	0	0	0	0	0	0	0	0
Meta-Protein 4386	BLAST_FATA_VIBA7 Ferric anguibactin receptor OS=Vibrio anguillarum (strain ATCC 68554 / 775) GN=fatA PE=3 SV=1_P11461	Cell outer membrane;Complete proteome;Ion transport;Iron;Iron transport;Membrane;Plasmid;Receptor;Reference proteome;Signal;TonB box;Transmembrane;Transmembrane beta strand;Transport;	;;;	;	;;;	;	UniRef50_P11461	UniRef90_P11461	UniRef100_P11461	Bacteria	Vibrio anguillarum 775	unknown	Gammaproteobacteria	Vibrionales	Vibrionaceae	Vibrio	Vibrio anguillarum 775	Listonella anguillarum serovar O1	1	0	0	0	0	0	0	0	0	0	0	0	0	0	0	0	0	0	0	1	0	0	0	0	0	0	0	0	0	0	0
Meta-Protein 2120	BLAST_SYM_BACTN Methionine--tRNA ligase OS=Bacteroides thetaiotaomicron (strain ATCC 29148 / DSM 2079 / NCTC 10582 / E50 / VPI-5482) GN=metG PE=3 SV=1_Q8A3M1	ATP-binding;Aminoacyl-tRNA synthetase;Complete proteome;Cytoplasm;Ligase;Metal-binding;Nucleotide-binding;Protein biosynthesis;RNA-binding;Reference proteome;Zinc;tRNA-binding;	;6.1.1.10;;	6.1.1.10;	;K01874;;	K01874;	UniRef50_Q64MP7	UniRef90_A6KYR3	UniRef100_A6KYR3	Bacteria	Bacteroidales	unknown	Bacteroidia	Bacteroidales	Bacteroidales	Bacteroidales	Bacteroidales	Bacteroidales	3	0	0	0	0	0	0	0	0	0	0	0	0	0	0	0	0	0	0	0	0	0	2	1	0	0	0	0	0	0	0
Meta-Protein 1867	Metagenome Unknown		;;		;;					Uncategorized	Uncategorized	unknown	Uncategorized	Uncategorized	Uncategorized	Uncategorized	Uncategorized	Uncategorized	1	0	0	0	0	0	0	0	0	0	0	0	0	0	0	0	0	0	0	0	1	0	0	0	0	0	0	0	0	0	0
Meta-Protein 3073	BLAST_ANCA_CLOTH Cellulosome-anchoring protein OS=Clostridium thermocellum (strain ATCC 27405 / DSM 1237 / NBRC 103400 / NCIMB 10682 / NRRL B-4536 / VPI 7372) GN=ancA PE=1 SV=1_Q06848	3D-structure;Carbohydrate metabolism;Cell wall;Cellulose degradation;Complete proteome;Polysaccharide degradation;Reference proteome;Repeat;S-layer;Secreted;Signal;	;;;	;	;;;	;	UniRef50_Q06848	UniRef90_Q06848	UniRef100_Q06848	Bacteria	Clostridium thermocellum ATCC 27405	unknown	Clostridia	Clostridiales	Clostridiaceae	Clostridium	Clostridium thermocellum	Clostridium thermocellum ATCC 27405	5	1	2	2	0	0	0	0	0	0	0	0	0	0	0	0	0	0	0	0	0	0	0	0	0	0	0	0	0	0	0
Meta-Protein 741	BLAST_DBH_STAAW DNA-binding protein HU OS=Staphylococcus aureus (strain MW2) GN=hup PE=3 SV=1_Q7A0U9	3D-structure;Complete proteome;DNA condensation;DNA-binding;	;;;	;	;K03530;;	K03530;	UniRef50_P68573	UniRef90_Q5HFV0	UniRef100_Q5HFV0	Bacteria	Staphylococcus aureus subsp. aureus	unknown	Bacilli	Bacillales	Staphylococcaceae	Staphylococcus	Staphylococcus aureus	Staphylococcus aureus subsp. aureus	56	1	1	0	14	14	10	3	2	2	1	3	1	2	1	0	1	0	0	0	0	0	0	0	0	0	0	0	0	0	0
Meta-Protein 3535	Metagenome unknown		;;		;;					Uncategorized	Uncategorized	unknown	Uncategorized	Uncategorized	Uncategorized	Uncategorized	Uncategorized	Uncategorized	1	0	0	1	0	0	0	0	0	0	0	0	0	0	0	0	0	0	0	0	0	0	0	0	0	0	0	0	0	0	0
Meta-Protein 17	ACDA3_METAC Acetyl-CoA decarbonylase/synthase complex subunit alpha 3 OS=Methanosarcina acetivorans (strain ATCC 35395 / DSM 2834 / JCM 12185 / C2A) GN=cdhA3 PE=3 SV=1	3D-structure;4Fe-4S;Complete proteome;Direct protein sequencing;Iron;Iron-sulfur;Metal-binding;Methanogenesis;Nickel;Oxidoreductase;Reference proteome;Repeat;	;1.2.7.4;;	1.2.7.4;	;;K00192;;	;K00192;	UniRef50_Q46G04	EMPTY	EMPTY	Archaea	Methanosarcina	unknown	Methanomicrobia	Methanosarcinales	Methanosarcinaceae	Methanosarcina	Methanosarcina	Methanosarcina	515	70	58	54	47	36	35	25	10	15	48	29	30	13	7	11	8	13	6	0	0	0	0	0	0	0	0	0	0	0	0
Meta-Protein 128	Metagenome unknown		;;		;;					Uncategorized	Uncategorized	unknown	Uncategorized	Uncategorized	Uncategorized	Uncategorized	Uncategorized	Uncategorized	2	1	0	0	0	0	0	1	0	0	0	0	0	0	0	0	0	0	0	0	0	0	0	0	0	0	0	0	0	0	0
Meta-Protein 4360	BLAST_RL4_PARD8 50S ribosomal protein L4 OS=Parabacteroides distasonis (strain ATCC 8503 / DSM 20701 / CIP 104284 / JCM 5825 / NCTC 11152) GN=rplD PE=3 SV=1_A6LEJ0	Complete proteome;RNA-binding;Reference proteome;Ribonucleoprotein;Ribosomal protein;rRNA-binding;	;;;	;	;K02926;;	K02926;	UniRef50_A6GZ98	UniRef90_A6LEJ0	UniRef100_A6LEJ0	Bacteria	Parabacteroides distasonis ATCC 8503	unknown	Bacteroidia	Bacteroidales	Porphyromonadaceae	Parabacteroides	Parabacteroides distasonis	Parabacteroides distasonis ATCC 8503	16	0	0	0	0	0	0	0	0	0	0	0	0	0	0	0	0	0	0	5	4	0	0	0	2	0	0	1	2	0	2
Meta-Protein 2192	Metagenome Unknown		;;		;;					Uncategorized	Uncategorized	unknown	Uncategorized	Uncategorized	Uncategorized	Uncategorized	Uncategorized	Uncategorized	7	0	0	0	0	0	0	0	0	0	0	0	0	0	0	0	0	0	0	0	0	0	0	3	0	0	0	0	0	0	0
Meta-Protein 1016	BLAST_GLPK_CHLSY Glycerol kinase OS=Chloroflexus aurantiacus (strain ATCC 29364 / DSM 637 / Y-400-fl) GN=glpK PE=3 SV=1_B9LD34	ATP-binding;Complete proteome;Glycerol metabolism;Kinase;Nucleotide-binding;Reference proteome;Transferase;	;2.7.1.30;;	2.7.1.30;	;K00864;;	K00864;	UniRef50_Q49X93	UniRef90_A9WJ21	EMPTY	Bacteria	Chloroflexus	unknown	Chloroflexi	Chloroflexales	Chloroflexaceae	Chloroflexus	Chloroflexus	Chloroflexus	6	0	0	0	2	0	4	0	0	0	0	0	0	0	0	0	0	0	0	0	0	0	0	0	0	0	0	0	0	0	0
Meta-Protein 4667	BLAST_LDH2_BACAN L-lactate dehydrogenase 2 OS=Bacillus anthracis GN=ldh2 PE=3 SV=1_Q81K80	Complete proteome;Cytoplasm;NAD;Oxidoreductase;Phosphoprotein;Reference proteome;	;1.1.1.27;;	1.1.1.27;	;K00016;;	K00016;	UniRef50_Q81K80	UniRef90_Q81K80	UniRef100_Q81K80	Bacteria	Bacillus cereus group	unknown	Bacilli	Bacillales	Bacillaceae	Bacillus	Bacillus cereus group	Bacillus cereus group	2	0	0	0	0	0	0	0	0	0	0	0	0	0	0	0	0	0	0	0	0	0	1	0	0	0	0	0	0	0	0
Meta-Protein 4814	BLAST_ETFA_THETC Electron transfer flavoprotein subunit alpha OS=Thermoanaerobacterium thermosaccharolyticum (strain ATCC 7956 / DSM 571 / NCIB 9385 / NCA 3814) GN=etfA PE=3 SV=2_P71153	Complete proteome;Electron transport;FAD;Flavoprotein;Transport;	;;;	;	;K03522;;	K03522;	UniRef50_P71153	UniRef90_P71153	UniRef100_P71153	Bacteria	Thermoanaerobacterium thermosaccharolyticum DSM 571	unknown	Clostridia	Thermoanaerobacterales	Thermoanaerobacterales Family III. Incertae Sedis	Thermoanaerobacterium	Thermoanaerobacterium thermosaccharolyticum	Thermoanaerobacterium thermosaccharolyticum DSM 571	2	0	0	0	0	0	0	0	0	0	0	0	0	0	0	0	0	0	0	0	0	0	0	0	0	1	0	1	0	0	0
Meta-Protein 4846	Metagenome Unknown		;;		;;					Uncategorized	Uncategorized	unknown	Uncategorized	Uncategorized	Uncategorized	Uncategorized	Uncategorized	Uncategorized	1	0	0	0	0	0	0	0	0	0	0	0	0	0	0	0	0	0	0	0	0	0	0	0	0	1	0	0	0	0	0
Meta-Protein 1352	BLAST_GATM_XENLA Glycine amidinotransferase, mitochondrial OS=Xenopus laevis GN=gatm PE=2 SV=2_Q9IAJ6	Acetylation;Complete proteome;Direct protein sequencing;Membrane;Mitochondrion;Mitochondrion inner membrane;Phosphoprotein;Reference proteome;Transferase;Transit peptide;	;2.1.4.1;;	2.1.4.1;	;K00613;;	K00613;	EMPTY	EMPTY	UniRef100_Q9D964	Eukaryota	Metazoa	unknown	Tetrapoda	Tetrapoda	Tetrapoda	Tetrapoda	Tetrapoda	Tetrapoda	15	0	0	0	0	0	0	0	0	0	0	0	0	0	0	0	0	0	0	4	1	0	0	0	1	0	0	0	2	3	4
Meta-Protein 1059	CAPP1_MAIZE Phosphoenolpyruvate carboxylase 1 OS=Zea mays GN=PEP1 PE=1 SV=2	3D-structure;Allosteric enzyme;Carbon dioxide fixation;Complete proteome;Cytoplasm;Direct protein sequencing;Lyase;Magnesium;Manganese;Phosphoprotein;Photosynthesis;Reference proteome;Stress response;	;4.1.1.31;;	4.1.1.31;	;;K01595;;	;K01595;	UniRef50_Q9MAH0	UniRef90_Q43299	EMPTY	Eukaryota	Viridiplantae	unknown	Spermatophyta	Spermatophyta	Spermatophyta	Spermatophyta	Spermatophyta	Spermatophyta	1	0	0	0	0	1	0	0	0	0	0	0	0	0	0	0	0	0	0	0	0	0	0	0	0	0	0	0	0	0	0
Meta-Protein 530	BLAST_MCRG_METTM Methyl-coenzyme M reductase I subunit gamma OS=Methanothermobacter marburgensis (strain ATCC BAA-927 / DSM 2133 / JCM 14651 / NBRC 100331 / OCM 82 / Marburg) GN=mcrG PE=1 SV=3_P11562	3D-structure;Complete proteome;Direct protein sequencing;Methanogenesis;Reference proteome;Transferase;	;2.8.4.1;;	2.8.4.1;	;;K00402;;	;K00402;	UniRef50_P11562	EMPTY	EMPTY	Archaea	Methanobacteriales	unknown	Methanobacteria	Methanobacteriales	Methanobacteriales	Methanobacteriales	Methanobacteriales	Methanobacteriales	105	14	11	8	11	10	8	2	3	2	14	6	11	1	1	1	1	0	1	0	0	0	0	0	0	0	0	0	0	0	0
Meta-Protein 1750	BLAST_FUCI_BACTN L-fucose isomerase OS=Bacteroides thetaiotaomicron (strain ATCC 29148 / DSM 2079 / NCTC 10582 / E50 / VPI-5482) GN=fucI PE=3 SV=1_Q9RQ13	3D-structure;Carbohydrate metabolism;Complete proteome;Cytoplasm;Direct protein sequencing;Fucose metabolism;Isomerase;Manganese;Metal-binding;Reference proteome;	;5.3.1.25;5.3.1.3;;	5.3.1.25;5.3.1.3;	;K01818;;	K01818;	UniRef50_Q8Z429	UniRef90_A6L048	UniRef100_A6L048	Bacteria	Bacteria	unknown	Bacteria	Bacteria	Bacteria	Bacteria	Bacteria	Bacteria	15	0	0	0	0	0	0	0	0	0	0	0	0	0	0	0	0	0	0	2	3	2	1	0	2	2	0	2	0	0	0
Meta-Protein 4875	BLAST_ISPH_CLOAB 4-hydroxy-3-methylbut-2-enyl diphosphate reductase OS=Clostridium acetobutylicum (strain ATCC 824 / DSM 792 / JCM 1419 / LMG 5710 / VKM B-1787) GN=ispH PE=3 SV=1_Q97I09	4Fe-4S;Complete proteome;Iron;Iron-sulfur;Isoprene biosynthesis;Metal-binding;Oxidoreductase;Reference proteome;	;1.17.7.4;;	1.17.7.4;	;K02945;K03527;;	K02945;K03527;	UniRef50_Q97I09	UniRef90_Q97I09	UniRef100_Q97I09	Bacteria	Clostridium acetobutylicum ATCC 824	unknown	Clostridia	Clostridiales	Clostridiaceae	Clostridium	Clostridium acetobutylicum	Clostridium acetobutylicum ATCC 824	2	0	0	0	0	0	0	0	0	0	0	0	0	0	0	0	0	0	0	0	0	0	0	0	0	1	1	0	0	0	0
Meta-Protein 4965	BLAST_RL30_PARD8 50S ribosomal protein L30 OS=Parabacteroides distasonis (strain ATCC 8503 / DSM 20701 / CIP 104284 / JCM 5825 / NCTC 11152) GN=rpmD PE=3 SV=1_A6LEH3	Complete proteome;Reference proteome;Ribonucleoprotein;Ribosomal protein;	;;;	;	;K02907;;	K02907;	UniRef50_A6LEH3	UniRef90_A6LEH3	UniRef100_A6LEH3	Bacteria	Parabacteroides distasonis ATCC 8503	unknown	Bacteroidia	Bacteroidales	Porphyromonadaceae	Parabacteroides	Parabacteroides distasonis	Parabacteroides distasonis ATCC 8503	1	0	0	0	0	0	0	0	0	0	0	0	0	0	0	0	0	0	0	0	0	0	0	0	0	0	0	0	0	0	1
Meta-Protein 4273	Metagenome unknown		;;		;;					Uncategorized	Uncategorized	unknown	Uncategorized	Uncategorized	Uncategorized	Uncategorized	Uncategorized	Uncategorized	1	0	0	0	0	0	0	0	0	0	0	0	1	0	0	0	0	0	0	0	0	0	0	0	0	0	0	0	0	0	0
Meta-Protein 4428	BLAST_PUR8_DICDI Adenylosuccinate lyase OS=Dictyostelium discoideum GN=purB PE=3 SV=1_Q54J34	Complete proteome;Lyase;Purine biosynthesis;Reference proteome;	;4.3.2.2;;	4.3.2.2;	;K01756;;	K01756;	UniRef50_Q54J34	UniRef90_Q54J34	UniRef100_Q54J34	Eukaryota	Dictyostelium discoideum	unknown	Dictyostelium discoideum	Dictyosteliida	Dictyostelium discoideum	Dictyostelium	Dictyostelium discoideum	Dictyostelium discoideum	1	0	0	0	0	0	0	0	0	0	0	0	0	0	0	0	0	0	0	1	0	0	0	0	0	0	0	0	0	0	0
Meta-Protein 688	BLAST_XYLA_BACTN Xylose isomerase OS=Bacteroides thetaiotaomicron (strain ATCC 29148 / DSM 2079 / NCTC 10582 / E50 / VPI-5482) GN=xylA PE=1 SV=1_Q8A9M2	3D-structure;Carbohydrate metabolism;Complete proteome;Cytoplasm;Isomerase;Magnesium;Metal-binding;Pentose shunt;Reference proteome;Xylose metabolism;	;5.3.1.5;;	5.3.1.5;	;K01805;;	K01805;	UniRef50_Q8A9M2	UniRef90_Q8A9M2	EMPTY	Bacteria	Bacteroides	unknown	Bacteroidia	Bacteroidales	Bacteroidaceae	Bacteroides	Bacteroides	Bacteroides	8	3	2	1	1	1	0	0	0	0	0	0	0	0	0	0	0	0	0	0	0	0	0	0	0	0	0	0	0	0	0
Meta-Protein 2229	BLAST_RS9_AGARV 30S ribosomal protein S9 OS=Agathobacter rectalis (strain ATCC 33656 / DSM 3377 / JCM 17463 / KCTC 5835 / VPI 0990) GN=rpsI PE=3 SV=1_C4ZI84	Complete proteome;Reference proteome;Ribonucleoprotein;Ribosomal protein;	;;;	;	;K02996;;	K02996;	UniRef50_C4ZI84	UniRef90_C4ZI84	UniRef100_C4ZI84	Bacteria	Clostridiales	unknown	Clostridia	Clostridiales	Clostridiales	Clostridiales	Clostridiales	Clostridiales	16	0	0	0	0	0	0	0	0	0	0	0	0	0	0	0	0	0	0	0	0	0	0	0	2	4	2	2	0	0	0
Meta-Protein 500	Metagenome unknown		;;		;;					Uncategorized	Uncategorized	unknown	Uncategorized	Uncategorized	Uncategorized	Uncategorized	Uncategorized	Uncategorized	144	11	12	10	9	9	7	8	10	6	17	9	10	4	3	4	4	6	5	0	0	0	0	0	0	0	0	0	0	0	0
Meta-Protein 4587	BLAST_PHSG_THELN Maltodextrin phosphorylase OS=Thermococcus litoralis (strain ATCC 51850 / DSM 5473 / JCM 8560 / NS-C) GN=malP PE=1 SV=1_Q9YGA7	Allosteric enzyme;Carbohydrate metabolism;Complete proteome;Direct protein sequencing;Glycosyltransferase;Maltose metabolism;Pyridoxal phosphate;Transferase;	;2.4.1.1;;	2.4.1.1;	;K00688;;	K00688;	UniRef50_Q9YGA7	UniRef90_Q9YGA7	UniRef100_Q9YGA7	Archaea	Thermococcus litoralis DSM 5473	unknown	Thermococci	Thermococcales	Thermococcaceae	Thermococcus	Thermococcus litoralis	Thermococcus litoralis DSM 5473	5	0	0	0	0	0	0	0	0	0	0	0	0	0	0	0	0	0	0	0	0	2	1	2	0	0	0	0	0	0	0
Meta-Protein 3359	BLAST_XP55_STRLI Protein XP55 OS=Streptomyces lividans GN=xp55 PE=3 SV=1_P06109	Cell membrane;Lipoprotein;Membrane;Palmitate;Signal;Transport;	;;;	;	;;;	;	UniRef50_P06109	UniRef90_P06109	UniRef100_P06109	Bacteria	Streptomyces lividans	unknown	Actinobacteria	Actinomycetales	Streptomycetaceae	Streptomyces	Streptomyces lividans	Streptomyces lividans	1	0	1	0	0	0	0	0	0	0	0	0	0	0	0	0	0	0	0	0	0	0	0	0	0	0	0	0	0	0	0
Meta-Protein 2205	VNN1_CANLF Pantetheinase OS=Canis lupus familiaris GN=VNN1 PE=2 SV=1	3D-structure;Alternative splicing;Cell membrane;Complete proteome;GPI-anchor;Glycoprotein;Hydrolase;Lipoprotein;Membrane;Polymorphism;Reference proteome;Signal;	;3.5.1.92;;	3.5.1.92;	;;K08069;;	;K08069;	UniRef50_O95497	UniRef90_Q9NY84	UniRef100_Q9NY84	Eukaryota	Metazoa	unknown	Mammalia	Eutheria	Eutheria	Eutheria	Eutheria	Eutheria	13	0	0	0	0	0	0	0	0	0	0	0	0	0	0	0	0	0	0	0	0	0	0	0	2	4	3	4	0	0	0
Meta-Protein 4133	BLAST_CGGR_BACSU Central glycolytic genes regulator OS=Bacillus subtilis (strain 168) GN=cggR PE=1 SV=1_O32253	3D-structure;Complete proteome;DNA-binding;Reference proteome;Repressor;Transcription;Transcription regulation;	;;;	;	;K05311;;	K05311;	UniRef50_O32253	UniRef90_O32253	UniRef100_O32253	Bacteria	Bacillus subtilis subsp. subtilis str. 168	unknown	Bacilli	Bacillales	Bacillaceae	Bacillus	Bacillus subtilis subsp. subtilis str. 168	Bacillus subtilis subsp. subtilis	1	0	0	0	0	0	0	0	0	0	0	0	0	0	0	0	1	0	0	0	0	0	0	0	0	0	0	0	0	0	0
Meta-Protein 845	BLAST_DARB_BPP1 Defense against restriction protein B OS=Escherichia phage P1 GN=darB PE=3 SV=1_Q71TF8	ATP-binding;Coiled coil;Complete proteome;Helicase;Host-virus interaction;Hydrolase;Nucleotide-binding;Reference proteome;Restriction-modification system evasion by virus;Virion;	;3.6.4.-;;	3.6.4.-;	;;;	;	UniRef50_Q71TF8	UniRef90_Q71TF8	UniRef100_Q71TF8	Viruses	Enterobacteria phage P1	unknown	Enterobacteria phage P1	Caudovirales	Myoviridae	Punalikevirus	Enterobacteria phage P1	Enterobacteria phage P1	1	0	1	0	0	0	0	0	0	0	0	0	0	0	0	0	0	0	0	0	0	0	0	0	0	0	0	0	0	0	0
Meta-Protein 1265	BLAST_MDR4_ENTHI Multidrug resistance protein 4 (Fragment) OS=Entamoeba histolytica GN=MDR4 PE=3 SV=1_P16877	ATP-binding;Cell membrane;Complete proteome;Membrane;Nucleotide-binding;Reference proteome;Repeat;Transmembrane;Transmembrane helix;Transport;	;;;	;	;;K06147;;	;K06147;	EMPTY	EMPTY	EMPTY	cellular organisms	cellular organisms	unknown	cellular organisms	cellular organisms	cellular organisms	cellular organisms	cellular organisms	cellular organisms	2	0	0	0	0	0	0	0	0	0	1	1	0	0	0	0	0	0	0	0	0	0	0	0	0	0	0	0	0	0	0
Meta-Protein 2820	BLAST_FWDB_METJA Tungsten-containing formylmethanofuran dehydrogenase 2 subunit B OS=Methanocaldococcus jannaschii (strain ATCC 43067 / DSM 2661 / JAL-1 / JCM 10045 / NBRC 100440) GN=fwdB PE=3 SV=2_P61154	Complete proteome;Methanogenesis;Oxidoreductase;Reference proteome;Selenocysteine;Tungsten;	;1.2.7.12;;	1.2.7.12;	;;;	;	UniRef50_P61154	UniRef90_P61154	UniRef100_P61154	Archaea	Methanocaldococcus jannaschii DSM 2661	unknown	Methanococci	Methanococcales	Methanocaldococcaceae	Methanocaldococcus	Methanocaldococcus jannaschii	Methanocaldococcus jannaschii DSM 2661	4	1	1	0	0	0	0	0	0	0	2	0	0	0	0	0	0	0	0	0	0	0	0	0	0	0	0	0	0	0	0
Meta-Protein 190	COFC_MYCLB 2-phospho-L-lactate guanylyltransferase OS=Mycobacterium leprae (strain Br4923) GN=cofC PE=3 SV=1	Complete proteome;GTP-binding;Nucleotide-binding;Nucleotidyltransferase;Reference proteome;Transferase;	;2.7.7.68;;	2.7.7.68;	;K14941;;	K14941;	UniRef50_Q73VJ2	UniRef90_B8ZS07	UniRef100_B8ZS07	Bacteria	Mycobacterium leprae	unknown	Actinobacteria	Actinomycetales	Mycobacteriaceae	Mycobacterium	Mycobacterium leprae	Mycobacterium leprae	6	2	2	0	0	0	0	0	0	0	1	0	1	0	0	0	0	0	0	0	0	0	0	0	0	0	0	0	0	0	0
Meta-Protein 2966	Metagenome unknown		;;		;;					Uncategorized	Uncategorized	unknown	Uncategorized	Uncategorized	Uncategorized	Uncategorized	Uncategorized	Uncategorized	45	4	4	5	6	6	4	6	1	3	2	2	2	0	0	0	0	0	0	0	0	0	0	0	0	0	0	0	0	0	0
Meta-Protein 3297	BLAST_G3P_CAVPO Glyceraldehyde-3-phosphate dehydrogenase (Fragment) OS=Cavia porcellus GN=GAPDH PE=2 SV=2_P70685	Acetylation;Apoptosis;Complete proteome;Cytoplasm;Cytoskeleton;Glycolysis;Isopeptide bond;Methylation;NAD;Nucleus;Oxidoreductase;Phosphoprotein;Reference proteome;S-nitrosylation;Transferase;Translation regulation;Ubl conjugation;	;1.2.1.12;2.6.99.-;;	1.2.1.12;2.6.99.-;	;;;	;	UniRef50_P70685	UniRef90_P70685	UniRef100_P70685	Eukaryota	Metazoa	unknown	Mammalia	Rodentia	Caviidae	Cavia	Cavia porcellus	Cavia porcellus	4	1	1	1	0	0	0	0	0	0	1	0	0	0	0	0	0	0	0	0	0	0	0	0	0	0	0	0	0	0	0
Meta-Protein 414	BLAST_OMPA_THEMA Outer membrane protein alpha OS=Thermotoga maritima (strain ATCC 43589 / MSB8 / DSM 3109 / JCM 10099) GN=omp-alpha PE=1 SV=2_Q01969	Cell outer membrane;Cell wall;Coiled coil;Complete proteome;Direct protein sequencing;Disulfide bond;Membrane;Reference proteome;Repeat;S-layer;Secreted;Signal;Transmembrane;Transmembrane helix;	;;;	;	;;;	;	EMPTY	EMPTY	EMPTY	Bacteria	Bacteria	unknown	Bacteria	Bacteria	Bacteria	Bacteria	Bacteria	Bacteria	161	1	3	2	40	37	24	13	21	15	0	0	1	1	2	0	0	1	0	0	0	0	0	0	0	0	0	0	0	0	0
Meta-Protein 1338	BLAST_PCKA_EUBE2 Phosphoenolpyruvate carboxykinase (ATP) OS=Eubacterium eligens (strain ATCC 27750 / VPI C15-48) GN=pckA PE=3 SV=1_C4Z0Q6	ATP-binding;Complete proteome;Cytoplasm;Decarboxylase;Gluconeogenesis;Lyase;Manganese;Metal-binding;Nucleotide-binding;Reference proteome;	;4.1.1.49;;	4.1.1.49;	;K01610;;	K01610;	UniRef50_Q8D1X9	UniRef90_C4Z0Q6	UniRef100_C4Z0Q6	Bacteria	Bacteria	unknown	Bacteria	Bacteria	Bacteria	Bacteria	Bacteria	Bacteria	368	0	0	0	0	0	0	0	0	0	0	0	0	0	0	0	0	0	0	25	31	8	18	14	43	41	33	43	13	4	11
Meta-Protein 1305	Metagenome unknown	Capsid protein;Complete proteome;Host cytoplasm;Late protein;Reference proteome;Virion;	;;;	;	;;;	;	UniRef50_Q6QIB5	UniRef90_Q6QIB5	UniRef100_Q6QIB5	Viruses	Burkholderia phage BcepMu USA/Summer/2002	unknown	Burkholderia phage BcepMu USA/Summer/2002	Caudovirales	Myoviridae	Bcepmulikevirus	Burkholderia phage BcepMu	Burkholderia phage BcepMu USA/Summer/2002	1	0	0	0	0	0	0	0	0	0	0	0	1	0	0	0	0	0	0	0	0	0	0	0	0	0	0	0	0	0	0
Meta-Protein 2852	BLAST_LACE_RHIRD Lactose-binding protein OS=Rhizobium radiobacter GN=lacE PE=1 SV=1_P29822	Direct protein sequencing;Periplasm;Signal;Sugar transport;Transport;	;;;	;	;;;	;	UniRef50_P29822	UniRef90_P29822	UniRef100_P29822	Bacteria	Agrobacterium tumefaciens	unknown	Alphaproteobacteria	Rhizobiales	Rhizobiaceae	Agrobacterium	Agrobacterium tumefaciens	Agrobacterium tumefaciens	77	11	10	9	6	3	5	5	1	5	5	5	7	0	1	1	1	1	1	0	0	0	0	0	0	0	0	0	0	0	0
Meta-Protein 2515	BLAST_FADB_VIBC3 Fatty acid oxidation complex subunit alpha OS=Vibrio cholerae serotype O1 (strain ATCC 39541 / Classical Ogawa 395 / O395) GN=fadB PE=3 SV=1_A5F465	Complete proteome;Fatty acid metabolism;Isomerase;Lipid degradation;Lipid metabolism;Lyase;Multifunctional enzyme;NAD;Oxidoreductase;Reference proteome;	;1.1.1.35;4.2.1.17;5.1.2.3;5.3.3.8;;	1.1.1.35;4.2.1.17;5.1.2.3;5.3.3.8;	;K01825;;	K01825;	UniRef50_P28793	UniRef90_Q9KNI1	EMPTY	Bacteria	Vibrio cholerae	unknown	Gammaproteobacteria	Vibrionales	Vibrionaceae	Vibrio	Vibrio cholerae	Vibrio cholerae	1	0	0	0	0	0	0	0	0	0	0	0	0	0	0	0	0	0	0	0	0	0	0	0	0	0	0	1	0	0	0
Meta-Protein 1267	BLAST_TKTC_METJA Putative transketolase C-terminal section OS=Methanocaldococcus jannaschii (strain ATCC 43067 / DSM 2661 / JAL-1 / JCM 10045 / NBRC 100440) GN=MJ0679 PE=5 SV=1_Q58092	Complete proteome;Reference proteome;Thiamine pyrophosphate;Transferase;	;2.2.1.1;;	2.2.1.1;	;K00615;;	K00615;	UniRef50_Q58092	UniRef90_Q58092	UniRef100_Q58092	Archaea	Methanocaldococcus jannaschii DSM 2661	unknown	Methanococci	Methanococcales	Methanocaldococcaceae	Methanocaldococcus	Methanocaldococcus jannaschii	Methanocaldococcus jannaschii DSM 2661	1	0	0	0	0	0	0	0	0	0	1	0	0	0	0	0	0	0	0	0	0	0	0	0	0	0	0	0	0	0	0
Meta-Protein 5146	BLAST_Y842_RICCN Putative uncharacterized protein RC0842 OS=Rickettsia conorii (strain ATCC VR-613 / Malish 7) GN=RC0842 PE=5 SV=1_Q92HC9	Complete proteome;	;;;	;	;;;	;	UniRef50_Q92HC9	UniRef90_Q92HC9	UniRef100_Q92HC9	Bacteria	Rickettsia conorii str. Malish 7	unknown	Alphaproteobacteria	Rickettsiales	Rickettsiaceae	Rickettsia	Rickettsia conorii	Rickettsia conorii str. Malish 7	1	0	0	0	0	0	0	0	0	0	0	0	0	0	0	0	0	0	0	0	0	0	0	0	0	0	0	0	0	0	0
Meta-Protein 4463	BLAST_PNP_BACV8 Polyribonucleotide nucleotidyltransferase OS=Bacteroides vulgatus (strain ATCC 8482 / DSM 1447 / JCM 5826 / NBRC 14291 / NCTC 11154) GN=pnp PE=3 SV=1_A6L0A5	Complete proteome;Cytoplasm;Magnesium;Metal-binding;Nucleotidyltransferase;RNA-binding;Reference proteome;Transferase;	;2.7.7.8;;	2.7.7.8;	;K00962;;	K00962;	UniRef50_B2RIW6	UniRef90_A6L0A5	UniRef100_A6L0A5	Bacteria	Bacteroides vulgatus ATCC 8482	unknown	Bacteroidia	Bacteroidales	Bacteroidaceae	Bacteroides	Bacteroides vulgatus	Bacteroides vulgatus ATCC 8482	1	0	0	0	0	0	0	0	0	0	0	0	0	0	0	0	0	0	0	0	1	0	0	0	0	0	0	0	0	0	0
Meta-Protein 4678	RPOA_MYCGE DNA-directed RNA polymerase subunit alpha OS=Mycoplasma genitalium (strain ATCC 33530 / G-37 / NCTC 10195) GN=rpoA PE=3 SV=1	Complete proteome;DNA-directed RNA polymerase;Nucleotidyltransferase;Reference proteome;Transcription;Transferase;	;2.7.7.6;;	2.7.7.6;	;K03040;;	K03040;	UniRef50_Q50295	UniRef90_P47423	UniRef100_P47423	Bacteria	Mycoplasma genitalium G37	unknown	Mollicutes	Mycoplasmatales	Mycoplasmataceae	Mycoplasma	Mycoplasma genitalium	Mycoplasma genitalium G37	1	0	0	0	0	0	0	0	0	0	0	0	0	0	0	0	0	0	0	0	0	0	1	0	0	0	0	0	0	0	0
Meta-Protein 2433	BLAST_AGASK_RUMGN Bifunctional alpha-galactosidase/sucrose kinase AgaSK OS=Ruminococcus gnavus GN=agaSK PE=1 SV=1_G4T4R7	3D-structure;ATP-binding;Glycosidase;Hydrolase;Kinase;Magnesium;Metal-binding;Multifunctional enzyme;Nucleotide-binding;Nucleotidyltransferase;Transferase;	;2.7.-.-;3.2.1.22;;	2.7.-.-;3.2.1.22;	;;;	;	UniRef50_G4T4R7	UniRef90_G4T4R7	UniRef100_G4T4R7	Bacteria	[Ruminococcus] gnavus	unknown	Clostridia	Clostridiales	Lachnospiraceae	Blautia	[Ruminococcus] gnavus	[Ruminococcus] gnavus	2	0	0	0	0	0	0	0	0	0	0	0	0	0	0	0	0	0	0	0	0	0	0	0	0	2	0	0	0	0	0
Meta-Protein 1067	BLAST_GRDD_PEPAC Glycine/sarcosine/betaine reductase complex component C subunit alpha OS=Peptoclostridium acidaminophilum GN=grdD PE=1 SV=2_Q47878	Direct protein sequencing;Oxidoreductase;	;1.21.4.2;1.21.4.3;1.21.4.4;;	1.21.4.2;1.21.4.3;1.21.4.4;	;;;	;	UniRef50_Q47878	UniRef90_Q47878	UniRef100_Q47878	Bacteria	Eubacterium acidaminophilum	unknown	Clostridia	Clostridiales	Eubacteriaceae	Eubacterium	Eubacterium acidaminophilum	Eubacterium acidaminophilum	1	0	0	0	0	0	1	0	0	0	0	0	0	0	0	0	0	0	0	0	0	0	0	0	0	0	0	0	0	0	0
Meta-Protein 78	BLAST_MALE_THELN Trehalose/maltose-binding protein MalE OS=Thermococcus litoralis (strain ATCC 51850 / DSM 5473 / JCM 8560 / NS-C) GN=malE PE=1 SV=2_Q7LYW7	3D-structure;Cell membrane;Complete proteome;Glycoprotein;Lipoprotein;Membrane;Signal;Sugar transport;Transport;	;;;	;	;K02027;;	K02027;	UniRef50_Q7LYW7	UniRef90_Q7LYW7	UniRef100_Q7LYW7	Archaea	Thermococcus litoralis DSM 5473	unknown	Thermococci	Thermococcales	Thermococcaceae	Thermococcus	Thermococcus litoralis	Thermococcus litoralis DSM 5473	10	1	4	2	0	0	0	2	0	1	0	0	0	0	0	0	0	0	0	0	0	0	0	0	0	0	0	0	0	0	0
Meta-Protein 988	BLAST_CHVE_AGRFC Multiple sugar-binding periplasmic receptor ChvE OS=Agrobacterium fabrum (strain C58 / ATCC 33970) GN=chvE PE=1 SV=2_P25548	3D-structure;Chemotaxis;Complete proteome;Crown gall tumor;Periplasm;Reference proteome;Signal;	;;;	;	;;K10546;;	;K10546;	UniRef50_P25548	UniRef90_P25548	UniRef100_P25548	Bacteria	Agrobacterium tumefaciens complex	unknown	Alphaproteobacteria	Rhizobiales	Rhizobiaceae	Agrobacterium	Agrobacterium tumefaciens complex	Agrobacterium tumefaciens complex	16	0	0	0	2	2	8	1	1	2	0	0	0	0	0	0	0	0	0	0	0	0	0	0	0	0	0	0	0	0	0
Meta-Protein 3908	BLAST_ASPA_BACSU Aspartate ammonia-lyase OS=Bacillus subtilis (strain 168) GN=ansB PE=3 SV=2_P26899	Complete proteome;Lyase;Reference proteome;	;4.3.1.1;;	4.3.1.1;	;K01744;;	K01744;	UniRef50_P26899	UniRef90_P26899	UniRef100_P26899	Bacteria	Bacillus subtilis subsp. subtilis str. 168	unknown	Bacilli	Bacillales	Bacillaceae	Bacillus	Bacillus subtilis subsp. subtilis str. 168	Bacillus subtilis subsp. subtilis	1	0	0	0	0	0	1	0	0	0	0	0	0	0	0	0	0	0	0	0	0	0	0	0	0	0	0	0	0	0	0
Meta-Protein 1026	BLAST_GELLY_BACSP Gellan lyase OS=Bacillus sp. PE=1 SV=1_O82833	Direct protein sequencing;Lyase;Secreted;Signal;	;4.2.2.25;;	4.2.2.25;	;K20610;;	K20610;	UniRef50_O82833	UniRef90_O82833	UniRef100_O82833	Bacteria	Bacillus sp.	unknown	Bacilli	Bacillales	Bacillaceae	Bacillus	Bacillus sp.	Bacillus sp.	4	0	0	0	1	1	0	2	0	0	0	0	0	0	0	0	0	0	0	0	0	0	0	0	0	0	0	0	0	0	0
Meta-Protein 4722	Metagenome Unknown		;;		;;					Uncategorized	Uncategorized	unknown	Uncategorized	Uncategorized	Uncategorized	Uncategorized	Uncategorized	Uncategorized	1	0	0	0	0	0	0	0	0	0	0	0	0	0	0	0	0	0	0	0	0	0	0	1	0	0	0	0	0	0	0
Meta-Protein 240	BLAST_CHVE_AGRFC Multiple sugar-binding periplasmic receptor ChvE OS=Agrobacterium fabrum (strain C58 / ATCC 33970) GN=chvE PE=1 SV=2_P25548	3D-structure;ATP-binding;Cell membrane;Chemotaxis;Complete proteome;Crown gall tumor;Hydrolase;Membrane;Nucleotide-binding;Periplasm;Reference proteome;Repeat;Signal;Sugar transport;Transport;	;;3.6.3.17;;	;3.6.3.17;	;;K10546;K10548;;	;K10546;K10548;	UniRef50_P25548	UniRef90_P25548	UniRef100_P25548	Bacteria	Bacteria	unknown	Bacteria	Bacteria	Bacteria	Bacteria	Bacteria	Bacteria	447	38	45	44	64	48	29	37	17	19	26	19	18	5	7	4	8	10	9	0	0	0	0	0	0	0	0	0	0	0	0
Meta-Protein 742	BLAST_HPF_BACSU Ribosome hibernation promotion factor OS=Bacillus subtilis (strain 168) GN=yvyD PE=1 SV=2_P28368	3D-structure;Complete proteome;Cytoplasm;Direct protein sequencing;Reference proteome;Stress response;Translation regulation;	;;;	;	;;;	;	UniRef50_Q2FIN9	UniRef90_P28368	UniRef100_P28368	Bacteria	Bacillus subtilis subsp. subtilis str. 168	unknown	Bacilli	Bacillales	Bacillaceae	Bacillus	Bacillus subtilis subsp. subtilis str. 168	Bacillus subtilis subsp. subtilis	3	1	1	1	0	0	0	0	0	0	0	0	0	0	0	0	0	0	0	0	0	0	0	0	0	0	0	0	0	0	0
Meta-Protein 4053	BLAST_CAT2_CLOK5 4-hydroxybutyrate coenzyme A transferase OS=Clostridium kluyveri (strain ATCC 8527 / DSM 555 / NCIMB 10680) GN=cat2 PE=3 SV=3_P38942	Complete proteome;Reference proteome;Transferase;	;2.8.3.-;;	2.8.3.-;	;K18122;;	K18122;	UniRef50_P38942	UniRef90_P38942	UniRef100_P38942	Bacteria	Clostridium kluyveri DSM 555	unknown	Clostridia	Clostridiales	Clostridiaceae	Clostridium	Clostridium kluyveri	Clostridium kluyveri DSM 555	2	0	0	0	0	0	0	0	1	1	0	0	0	0	0	0	0	0	0	0	0	0	0	0	0	0	0	0	0	0	0
Meta-Protein 2292	Metagenome Unknown	Cell wall;S-layer;Secreted;Signal;	;;;	;	;;;	;	UniRef50_P35830	UniRef90_P35830	UniRef100_P35830	Bacteria	Bacteria	unknown	Bacteria	Bacteria	Bacteria	Bacteria	Bacteria	Bacteria	39	0	0	0	0	0	0	0	0	0	0	0	0	0	0	0	0	0	0	0	0	0	0	0	0	6	3	6	0	0	0
Meta-Protein 460	BLAST_RL18_LACRD 50S ribosomal protein L18 OS=Lactobacillus reuteri (strain DSM 20016) GN=rplR PE=3 SV=1_A5VLI9	Complete proteome;RNA-binding;Reference proteome;Ribonucleoprotein;Ribosomal protein;rRNA-binding;	;;;	;	;K02881;;	K02881;	UniRef50_Q72I20	UniRef90_B2TIJ1	UniRef100_B2UYC6	Bacteria	Firmicutes	unknown	Firmicutes	Firmicutes	Firmicutes	Firmicutes	Firmicutes	Firmicutes	7	1	0	1	0	0	0	0	0	0	2	1	2	0	0	0	0	0	0	0	0	0	0	0	0	0	0	0	0	0	0
Meta-Protein 796	BLAST_SLPA_DEIRA S-layer protein SlpA OS=Deinococcus radiodurans (strain ATCC 13939 / DSM 20539 / JCM 16871 / LMG 4051 / NBRC 15346 / NCIMB 9279 / R1 / VKM B-1422) GN=slpA PE=1 SV=1_Q9RRB6	Cell wall;Complete proteome;Disulfide bond;Reference proteome;S-layer;Secreted;Signal;	;;;	;	;;;	;	UniRef50_Q9RRB6	UniRef90_Q9RRB6	UniRef100_Q9RRB6	Bacteria	Deinococcus radiodurans R1	unknown	Deinococci	Deinococcales	Deinococcaceae	Deinococcus	Deinococcus radiodurans	Deinococcus radiodurans R1	4	0	1	0	0	0	0	1	1	0	1	0	0	0	0	0	0	0	0	0	0	0	0	0	0	0	0	0	0	0	0
Meta-Protein 2627	BLAST_AHPC_ACICA Alkyl hydroperoxide reductase C (Fragment) OS=Acinetobacter calcoaceticus GN=ahpC PE=1 SV=1_P82954	3D-structure;Acetylation;Antioxidant;Complete proteome;Cytoplasm;Direct protein sequencing;Disulfide bond;Oxidoreductase;Peroxidase;Redox-active center;Reference proteome;Secreted;Stress response;	;1.11.1.15;;	1.11.1.15;	;;K03386;;	;K03386;	UniRef50_P0AE10	UniRef90_Q02UU0	UniRef100_Q02UU0	Bacteria	Proteobacteria	unknown	Proteobacteria	Proteobacteria	Proteobacteria	Proteobacteria	Proteobacteria	Proteobacteria	5	0	0	0	0	0	0	0	0	0	0	0	0	0	0	0	0	0	0	0	0	0	0	0	0	0	0	0	0	0	0
Meta-Protein 1250	BLAST_AMPPA_METBF AMP phosphorylase OS=Methanosarcina barkeri (strain Fusaro / DSM 804) GN=Mbar_A3188 PE=3 SV=1_Q466X0	Complete proteome;Glycosyltransferase;Reference proteome;Transferase;	;2.4.2.57;;	2.4.2.57;	;K18931;;	K18931;	UniRef50_Q8TL01	UniRef90_Q8TL01	EMPTY	Archaea	Methanosarcina	unknown	Methanomicrobia	Methanosarcinales	Methanosarcinaceae	Methanosarcina	Methanosarcina	Methanosarcina	1	0	0	0	0	0	0	0	0	0	1	0	0	0	0	0	0	0	0	0	0	0	0	0	0	0	0	0	0	0	0
Meta-Protein 519	BLAST_GCST_BACV8 Aminomethyltransferase OS=Bacteroides vulgatus (strain ATCC 8482 / DSM 1447 / JCM 5826 / NBRC 14291 / NCTC 11154) GN=gcvT PE=3 SV=1_A6L6X5	Aminotransferase;Complete proteome;Reference proteome;Transferase;	;2.1.2.10;;	2.1.2.10;	;K00605;;	K00605;	UniRef50_Q1INT8	UniRef90_Q24TH3	UniRef100_Q24TH3	Bacteria	Bacteria	unknown	Bacteria	Bacteria	Bacteria	Bacteria	Bacteria	Bacteria	124	18	18	17	7	5	8	7	9	10	10	4	5	1	1	0	2	1	1	0	0	0	0	0	0	0	0	0	0	0	0
Meta-Protein 2897	BLAST_MAAL_CLOTT Methylaspartate ammonia-lyase OS=Clostridium tetanomorphum PE=1 SV=1_Q05514	3D-structure;Cobalamin;Cobalt;Direct protein sequencing;Lyase;Magnesium;Metal-binding;	;4.3.1.2;;	4.3.1.2;	;;;	;	UniRef50_Q05514	UniRef90_Q05514	UniRef100_Q05514	Bacteria	Clostridium tetanomorphum	unknown	Clostridia	Clostridiales	Clostridiaceae	Clostridium	Clostridium tetanomorphum	Clostridium tetanomorphum	22	3	3	3	1	1	1	2	1	2	1	2	2	0	0	0	0	0	0	0	0	0	0	0	0	0	0	0	0	0	0
Meta-Protein 144	BLAST_PHSM_STRPN Maltodextrin phosphorylase OS=Streptococcus pneumoniae serotype 4 (strain ATCC BAA-334 / TIGR4) GN=malP PE=3 SV=2_P29849	Allosteric enzyme;Carbohydrate metabolism;Complete proteome;Glycosyltransferase;Pyridoxal phosphate;Transferase;	;2.4.1.1;;	2.4.1.1;	;K00688;;	K00688;	UniRef50_P29849	UniRef90_P29849	UniRef100_P29849	Bacteria	Streptococcus pneumoniae TIGR4	unknown	Bacilli	Lactobacillales	Streptococcaceae	Streptococcus	Streptococcus pneumoniae	Streptococcus pneumoniae TIGR4	73	16	14	12	4	3	2	3	2	1	9	4	3	0	0	0	0	0	0	0	0	0	0	0	0	0	0	0	0	0	0
Meta-Protein 3363	BLAST_SDP_EIMBO Sporozoite developmental protein OS=Eimeria bovis PE=2 SV=1_P42789	Hydrolase;Metal-binding;Metalloprotease;Protease;Zinc;	;3.4.24.-;;	3.4.24.-;	;;;	;	UniRef50_P42789	UniRef90_P42789	UniRef100_P42789	Eukaryota	Eimeria bovis	unknown	Coccidia	Eucoccidiorida	Eimeriidae	Eimeria	Eimeria bovis	Eimeria bovis	7	0	1	0	3	0	0	1	2	0	0	0	0	0	0	0	0	0	0	0	0	0	0	0	0	0	0	0	0	0	0
Meta-Protein 4771	Metagenome Unknown		;;		;;					Uncategorized	Uncategorized	unknown	Uncategorized	Uncategorized	Uncategorized	Uncategorized	Uncategorized	Uncategorized	1	0	0	0	0	0	0	0	0	0	0	0	0	0	0	0	0	0	0	0	0	0	0	0	1	0	0	0	0	0	0
Meta-Protein 1524	BLAST_CSPS_STRTR Cold shock protein CspSt (Fragment) OS=Streptococcus thermophilus PE=1 SV=1_P81622	Activator;Cytoplasm;DNA-binding;Direct protein sequencing;Stress response;Transcription;Transcription regulation;	;;;	;	;;;	;	UniRef50_P81622	UniRef90_P81622	UniRef100_P81622	Bacteria	Streptococcus thermophilus	unknown	Bacilli	Lactobacillales	Streptococcaceae	Streptococcus	Streptococcus thermophilus	Streptococcus thermophilus	3	0	0	0	0	0	0	0	0	0	0	0	0	0	0	0	0	0	0	2	0	0	0	0	0	0	0	0	0	0	1
Meta-Protein 5041	MDH_SINMW Malate dehydrogenase OS=Sinorhizobium medicae (strain WSM419) GN=mdh PE=3 SV=1	Complete proteome;NAD;Oxidoreductase;Tricarboxylic acid cycle;	;1.1.1.37;;	1.1.1.37;	;K00024;;	K00024;	UniRef50_Q7CWK7	UniRef90_Q7CWK7	UniRef100_A6UDP3	Bacteria	Sinorhizobium medicae WSM419	unknown	Alphaproteobacteria	Rhizobiales	Rhizobiaceae	Sinorhizobium	Sinorhizobium medicae	Sinorhizobium medicae WSM419	3	0	0	0	0	0	0	0	0	0	0	0	0	0	0	0	0	0	0	0	0	0	0	0	0	0	0	0	0	0	0
Meta-Protein 1297	BLAST_RS5_BACV8 30S ribosomal protein S5 OS=Bacteroides vulgatus (strain ATCC 8482 / DSM 1447 / JCM 5826 / NBRC 14291 / NCTC 11154) GN=rpsE PE=3 SV=1_A6KYH8	Complete proteome;RNA-binding;Reference proteome;Ribonucleoprotein;Ribosomal protein;rRNA-binding;	;;;	;	;K02988;;	K02988;	EMPTY	EMPTY	EMPTY	Bacteria	Bacteroidales	unknown	Bacteroidia	Bacteroidales	Bacteroidales	Bacteroidales	Bacteroidales	Bacteroidales	1	0	0	0	0	0	0	0	0	0	0	0	1	0	0	0	0	0	0	0	0	0	0	0	0	0	0	0	0	0	0
Meta-Protein 3858	BLAST_TRPE_CLOTM Anthranilate synthase component 1 OS=Clostridium thermocellum GN=trpE PE=3 SV=1_P14953	Amino-acid biosynthesis;Aromatic amino acid biosynthesis;Lyase;Magnesium;Metal-binding;Tryptophan biosynthesis;	;4.1.3.27;;	4.1.3.27;	;;;	;	UniRef50_P14953	UniRef90_P14953	UniRef100_P14953	Bacteria	Clostridium thermocellum	unknown	Clostridia	Clostridiales	Clostridiaceae	Clostridium	Clostridium thermocellum	Clostridium thermocellum	1	0	0	0	0	1	0	0	0	0	0	0	0	0	0	0	0	0	0	0	0	0	0	0	0	0	0	0	0	0	0
Meta-Protein 3336	Metagenome unknown		;;		;;					Uncategorized	Uncategorized	unknown	Uncategorized	Uncategorized	Uncategorized	Uncategorized	Uncategorized	Uncategorized	1	0	1	0	0	0	0	0	0	0	0	0	0	0	0	0	0	0	0	0	0	0	0	0	0	0	0	0	0	0	0
Meta-Protein 4479	Metagenome Unknown		;;		;;					Uncategorized	Uncategorized	unknown	Uncategorized	Uncategorized	Uncategorized	Uncategorized	Uncategorized	Uncategorized	1	0	0	0	0	0	0	0	0	0	0	0	0	0	0	0	0	0	0	0	1	0	0	0	0	0	0	0	0	0	0
Meta-Protein 3323	BLAST_ARAA_HERA2 L-arabinose isomerase OS=Herpetosiphon aurantiacus (strain ATCC 23779 / DSM 785) GN=araA PE=3 SV=1_A9B689	Arabinose catabolism;Carbohydrate metabolism;Complete proteome;Isomerase;Manganese;Metal-binding;Reference proteome;	;5.3.1.4;;	5.3.1.4;	;K01804;;	K01804;	UniRef50_A1JMB6	UniRef90_A9B689	UniRef100_A9B689	Bacteria	Herpetosiphon aurantiacus DSM 785	unknown	Chloroflexi	Herpetosiphonales	Herpetosiphonaceae	Herpetosiphon	Herpetosiphon aurantiacus	Herpetosiphon aurantiacus DSM 785	1	0	1	0	0	0	0	0	0	0	0	0	0	0	0	0	0	0	0	0	0	0	0	0	0	0	0	0	0	0	0
Meta-Protein 3242	Metagenome unknown		;;		;;					Uncategorized	Uncategorized	unknown	Uncategorized	Uncategorized	Uncategorized	Uncategorized	Uncategorized	Uncategorized	6	2	1	1	0	0	0	0	0	0	0	1	1	0	0	0	0	0	0	0	0	0	0	0	0	0	0	0	0	0	0
Meta-Protein 4730	Metagenome Unknown		;;		;;					Uncategorized	Uncategorized	unknown	Uncategorized	Uncategorized	Uncategorized	Uncategorized	Uncategorized	Uncategorized	2	0	0	0	0	0	0	0	0	0	0	0	0	0	0	0	0	0	0	0	0	0	0	2	0	0	0	0	0	0	0
Meta-Protein 698	BLAST_RL27_LACP7 50S ribosomal protein L27 OS=Lachnoclostridium phytofermentans (strain ATCC 700394 / DSM 18823 / ISDg) GN=rpmA PE=3 SV=1_A9KMF6	Complete proteome;Reference proteome;Ribonucleoprotein;Ribosomal protein;	;;;	;	;K02899;;	K02899;	UniRef50_O67650	UniRef90_A9KMF6	UniRef100_A9KMF6	Bacteria	Clostridium phytofermentans ISDg	unknown	Clostridia	Clostridiales	Clostridiaceae	Clostridium	Clostridium phytofermentans	Clostridium phytofermentans ISDg	4	1	0	0	0	0	0	2	0	0	1	0	0	0	0	0	0	0	0	0	0	0	0	0	0	0	0	0	0	0	0
Meta-Protein 3285	BLAST_FLGG_BACSU Flagellar basal-body rod protein FlgG OS=Bacillus subtilis (strain 168) GN=flgG PE=3 SV=2_P23446	Bacterial flagellum;Complete proteome;Reference proteome;	;;;	;	;K02390;;	K02390;	UniRef50_P23446	UniRef90_P23446	UniRef100_P23446	Bacteria	Bacillus subtilis subsp. subtilis str. 168	unknown	Bacilli	Bacillales	Bacillaceae	Bacillus	Bacillus subtilis subsp. subtilis str. 168	Bacillus subtilis subsp. subtilis	1	1	0	0	0	0	0	0	0	0	0	0	0	0	0	0	0	0	0	0	0	0	0	0	0	0	0	0	0	0	0
Meta-Protein 1394	BLAST_PDXS_DESHD Pyridoxal 5-phosphate synthase subunit PdxS OS=Desulfitobacterium hafniense (strain DCB-2 / DSM 10664) GN=pdxS PE=3 SV=1_B8FZR3	Complete proteome;Lyase;Pyridoxal phosphate;Reference proteome;Schiff base;	;4.3.3.6;;	4.3.3.6;	;K06215;;	K06215;	UniRef50_P37527	EMPTY	EMPTY	Bacteria	Firmicutes	unknown	Firmicutes	Firmicutes	Firmicutes	Firmicutes	Firmicutes	Firmicutes	15	0	0	0	0	0	0	0	0	0	0	0	0	0	0	0	0	0	0	8	4	0	0	0	3	0	0	0	0	0	0
Meta-Protein 1419	BLAST_DAPDH_BACFN Meso-diaminopimelate D-dehydrogenase OS=Bacteroides fragilis (strain ATCC 25285 / DSM 2151 / JCM 11019 / NCTC 9343) GN=ddh PE=1 SV=1_Q5L9Q6	Amino-acid biosynthesis;Complete proteome;Diaminopimelate biosynthesis;Lysine biosynthesis;NADP;Oxidoreductase;Reference proteome;	;1.4.1.16;;	1.4.1.16;	;K03340;;	K03340;	UniRef50_Q5L9Q6	UniRef90_Q5L9Q6	UniRef100_Q5L9Q6	Bacteria	Bacteroides fragilis NCTC 9343	unknown	Bacteroidia	Bacteroidales	Bacteroidaceae	Bacteroides	Bacteroides fragilis	Bacteroides fragilis NCTC 9343	5	0	0	0	0	0	0	0	0	0	0	0	0	0	0	0	0	0	0	3	0	0	0	0	2	0	0	0	0	0	0
Meta-Protein 4616	OVALY_CHICK Ovalbumin-related protein Y OS=Gallus gallus GN=SERPINB14B PE=1 SV=1	Complete proteome;Direct protein sequencing;Disulfide bond;Glycoprotein;Proteoglycan;Reference proteome;Secreted;	;;;	;	;;;	;	UniRef50_P01012	UniRef90_P01014	UniRef100_P01014	Eukaryota	Metazoa	unknown	Aves	Galliformes	Phasianidae	Gallus	Gallus gallus	Gallus gallus	1	0	0	0	0	0	0	0	0	0	0	0	0	0	0	0	0	0	0	0	0	0	1	0	0	0	0	0	0	0	0
Meta-Protein 112	BLAST_MCE_PYRHO Methylmalonyl-CoA epimerase OS=Pyrococcus horikoshii (strain ATCC 700860 / DSM 12428 / JCM 9974 / NBRC 100139 / OT-3) GN=PH0272 PE=1 SV=1_O58010	Cobalt;Complete proteome;Isomerase;Metal-binding;	;5.1.99.1;;	5.1.99.1;	;K05606;;	K05606;	UniRef50_O58010	UniRef90_O58010	UniRef100_O58010	Archaea	Pyrococcus horikoshii OT3	unknown	Thermococci	Thermococcales	Thermococcaceae	Pyrococcus	Pyrococcus horikoshii	Pyrococcus horikoshii OT3	19	5	2	0	3	1	1	3	0	1	2	0	1	0	0	0	0	0	0	0	0	0	0	0	0	0	0	0	0	0	0
Meta-Protein 3584	Metagenome unknown		;;		;;					Uncategorized	Uncategorized	unknown	Uncategorized	Uncategorized	Uncategorized	Uncategorized	Uncategorized	Uncategorized	4	0	0	0	2	2	0	0	0	0	0	0	0	0	0	0	0	0	0	0	0	0	0	0	0	0	0	0	0	0	0
Meta-Protein 4514	BLAST_RL5_BACV8 50S ribosomal protein L5 OS=Bacteroides vulgatus (strain ATCC 8482 / DSM 1447 / JCM 5826 / NBRC 14291 / NCTC 11154) GN=rplE PE=3 SV=1_A6KYI3	Complete proteome;RNA-binding;Reference proteome;Ribonucleoprotein;Ribosomal protein;rRNA-binding;tRNA-binding;	;;;	;	;K02931;;	K02931;	UniRef50_Q5SHQ0	UniRef90_Q8A488	UniRef100_A6KYI3	Bacteria	Bacteroides vulgatus ATCC 8482	unknown	Bacteroidia	Bacteroidales	Bacteroidaceae	Bacteroides	Bacteroides vulgatus	Bacteroides vulgatus ATCC 8482	3	0	0	0	0	0	0	0	0	0	0	0	0	0	0	0	0	0	0	0	1	0	0	0	0	0	1	1	0	0	0
Meta-Protein 5025	PHNC_CAUCR Phosphonates import ATP-binding protein PhnC OS=Caulobacter crescentus (strain ATCC 19089 / CB15) GN=phnC PE=3 SV=1	ATP-binding;Cell inner membrane;Cell membrane;Complete proteome;Hydrolase;Membrane;Nucleotide-binding;Phosphonate transport;Reference proteome;Transport;	;3.6.3.28;;	3.6.3.28;	;K02041;;	K02041;	UniRef50_Q9AB70	UniRef90_Q9AB70	UniRef100_Q9AB70	Bacteria	Caulobacter crescentus CB15	unknown	Alphaproteobacteria	Caulobacterales	Caulobacteraceae	Caulobacter	Caulobacter vibrioides	Caulobacter crescentus CB15	2	0	0	0	0	0	0	0	0	0	0	0	0	0	0	0	0	0	0	0	0	0	0	0	0	0	0	0	0	0	0
Meta-Protein 1693	BLAST_FRUE_BIFLO Fructose import binding protein FruE OS=Bifidobacterium longum (strain NCC 2705) GN=fruE PE=1 SV=1_Q8G848	3D-structure;Cell membrane;Complete proteome;DNA-binding;Direct protein sequencing;Lipoprotein;Membrane;Palmitate;Periplasm;Reference proteome;Repressor;Signal;Sugar transport;Transcription;Transcription regulation;Transport;	;;;	;	;K02058;K03487;K10439;;	K02058;K03487;K10439;	UniRef50_P39325	UniRef90_P39325	UniRef100_P39325	Bacteria	Bacteria	unknown	Bacteria	Bacteria	Bacteria	Bacteria	Bacteria	Bacteria	2	0	0	0	0	0	0	0	0	0	0	0	0	0	0	0	0	0	0	2	0	0	0	0	0	0	0	0	0	0	0
Meta-Protein 4433	BLAST_SUDHA_PYRFU Sulfide dehydrogenase subunit alpha OS=Pyrococcus furiosus (strain ATCC 43587 / DSM 3638 / JCM 8422 / Vc1) GN=sudA PE=1 SV=1_Q8U195	3D-structure;3Fe-4S;4Fe-4S;Complete proteome;Cytoplasm;Direct protein sequencing;FAD;Flavoprotein;Iron;Iron-sulfur;Metal-binding;NADP;Oxidoreductase;Reference proteome;	;1.18.1.2;1.8.1.19;;	1.18.1.2;1.8.1.19;	;K20202;;	K20202;	UniRef50_Q8U195	UniRef90_Q8U195	UniRef100_Q8U195	Archaea	Pyrococcus furiosus DSM 3638	unknown	Thermococci	Thermococcales	Thermococcaceae	Pyrococcus	Pyrococcus furiosus	Pyrococcus furiosus DSM 3638	3	0	0	0	0	0	0	0	0	0	0	0	0	0	0	0	0	0	0	1	0	0	0	0	0	0	1	0	1	0	0
Meta-Protein 4887	Metagenome Unknown		;;		;;					Uncategorized	Uncategorized	unknown	Uncategorized	Uncategorized	Uncategorized	Uncategorized	Uncategorized	Uncategorized	4	0	0	0	0	0	0	0	0	0	0	0	0	0	0	0	0	0	0	0	0	0	0	0	0	0	1	1	0	0	0
Meta-Protein 2533	Metagenome Unknown		;;		;;					Uncategorized	Uncategorized	unknown	Uncategorized	Uncategorized	Uncategorized	Uncategorized	Uncategorized	Uncategorized	1	0	0	0	0	0	0	0	0	0	0	0	0	0	0	0	0	0	0	0	0	0	0	0	0	0	0	0	0	0	1
Meta-Protein 2879	BLAST_SLAP1_CLOTH Cell surface glycoprotein 1 OS=Clostridium thermocellum (strain ATCC 27405 / DSM 1237 / NBRC 103400 / NCIMB 10682 / NRRL B-4536 / VPI 7372) GN=olpB PE=3 SV=2_Q06852	Cell wall;Complete proteome;Reference proteome;Repeat;S-layer;Secreted;Signal;	;;;	;	;;;	;	UniRef50_Q06852	UniRef90_Q06852	UniRef100_Q06852	Bacteria	Clostridium thermocellum ATCC 27405	unknown	Clostridia	Clostridiales	Clostridiaceae	Clostridium	Clostridium thermocellum	Clostridium thermocellum ATCC 27405	7	1	1	0	1	1	1	1	1	0	0	0	0	0	0	0	0	0	0	0	0	0	0	0	0	0	0	0	0	0	0
Meta-Protein 1289	ARF_AJECA ADP-ribosylation factor OS=Ajellomyces capsulatus GN=ARF PE=1 SV=3	3D-structure;Acetylation;Alternative splicing;Cell junction;Cell membrane;Complete proteome;Cytoplasm;Direct protein sequencing;ER-Golgi transport;Endosome;GTP-binding;Golgi apparatus;Lipoprotein;Membrane;Myristate;Nucleotide-binding;Phosphoprotein;Polymorphism;Postsynaptic cell membrane;Protein transport;Reference proteome;Synapse;Synaptosome;Transport;	;;;	;	;;K06883;K07937;K07938;K07939;K07940;K07977;;	;K06883;K07937;K07938;K07939;K07940;K07977;	UniRef50_Q3SZF2	UniRef90_Q3SZF2	UniRef100_P49702	Eukaryota	Eukaryota	unknown	Eukaryota	Eukaryota	Eukaryota	Eukaryota	Eukaryota	Eukaryota	1	0	0	0	0	0	0	0	0	0	0	1	0	0	0	0	0	0	0	0	0	0	0	0	0	0	0	0	0	0	0
Meta-Protein 4704	BLAST_ILVC_LACP7 Ketol-acid reductoisomerase (NADP(+)) OS=Lachnoclostridium phytofermentans (strain ATCC 700394 / DSM 18823 / ISDg) GN=ilvC PE=3 SV=1_A9KQ65	Amino-acid biosynthesis;Branched-chain amino acid biosynthesis;Complete proteome;Magnesium;Metal-binding;NADP;Nucleotide-binding;Oxidoreductase;Reference proteome;	;1.1.1.86;;	1.1.1.86;	;K00053;;	K00053;	UniRef50_C1DFH7	UniRef90_A9KQ65	UniRef100_A9KQ65	Bacteria	Clostridium phytofermentans ISDg	unknown	Clostridia	Clostridiales	Clostridiaceae	Clostridium	Clostridium phytofermentans	Clostridium phytofermentans ISDg	1	0	0	0	0	0	0	0	0	0	0	0	0	0	0	0	0	0	0	0	0	0	1	0	0	0	0	0	0	0	0
Meta-Protein 1363	BLAST_BGH3B_BACO1 Beta-glucosidase BoGH3B OS=Bacteroides ovatus (strain ATCC 8483 / DSM 1896 / JCM 5824 / NCTC 11153) GN=BACOVA_02659 PE=1 SV=1_A7LXU3	3D-structure;Carbohydrate metabolism;Complete proteome;Glycosidase;Hydrolase;Periplasm;Polysaccharide degradation;Signal;	;3.2.1.21;;	3.2.1.21;	;;;	;	UniRef50_A7LXU3	UniRef90_A7LXU3	UniRef100_A7LXU3	Bacteria	Bacteroides ovatus ATCC 8483	unknown	Bacteroidia	Bacteroidales	Bacteroidaceae	Bacteroides	Bacteroides ovatus	Bacteroides ovatus ATCC 8483	6	0	0	0	0	0	0	0	0	0	0	0	0	0	0	0	0	0	0	3	1	0	0	0	2	0	0	0	0	0	0
Meta-Protein 1715	BLAST_TRFL_HUMAN Lactotransferrin OS=Homo sapiens GN=LTF PE=1 SV=6_P02788	3D-structure;Alternative promoter usage;Antibiotic;Antimicrobial;Complete proteome;Cytoplasm;DNA-binding;Direct protein sequencing;Disulfide bond;Glycoprotein;Heparin-binding;Hydrolase;Immunity;Ion transport;Iron;Iron transport;Isopeptide bond;Metal-binding;Methylation;Nucleus;Osteogenesis;Phosphoprotein;Polymorphism;Protease;Reference proteome;Repeat;Secreted;Serine protease;Signal;Transcription…	;;3.4.21.-;;	;3.4.21.-;	;;K14736;K17283;;	;K14736;K17283;	UniRef50_P31226	UniRef90_P31226	UniRef100_P31226	Eukaryota	Metazoa	unknown	Tetrapoda	Tetrapoda	Tetrapoda	Tetrapoda	Tetrapoda	Tetrapoda	4	0	0	0	0	0	0	0	0	0	0	0	0	0	0	0	0	0	0	1	1	0	0	0	2	0	0	0	0	0	0
Meta-Protein 5202	BLAST_OMPA_BORAV Outer membrane protein A OS=Bordetella avium GN=ompA PE=3 SV=1_Q05146	Cell outer membrane;Ion transport;Membrane;Porin;Signal;Transmembrane;Transmembrane beta strand;Transport;	;;;	;	;;;	;	UniRef50_Q05146	UniRef90_Q05146	UniRef100_Q05146	Bacteria	Bordetella avium	unknown	Betaproteobacteria	Burkholderiales	Alcaligenaceae	Bordetella	Bordetella avium	Bordetella avium	2	0	0	0	0	0	0	0	0	0	0	0	0	0	0	0	0	0	0	0	0	0	0	0	0	0	0	0	0	0	0
Meta-Protein 983	BLAST_RS2_ALKOO 30S ribosomal protein S2 OS=Alkaliphilus oremlandii (strain OhILAs) GN=rpsB PE=3 SV=1_A8MHG9	Complete proteome;Reference proteome;Ribonucleoprotein;Ribosomal protein;	;;;	;	;K02967;;	K02967;	EMPTY	EMPTY	EMPTY	Bacteria	Clostridiales	unknown	Clostridia	Clostridiales	Clostridiales	Clostridiales	Clostridiales	Clostridiales	2	0	0	0	1	0	0	0	0	1	0	0	0	0	0	0	0	0	0	0	0	0	0	0	0	0	0	0	0	0	0
Meta-Protein 1632	LAMP2_HUMAN Lysosome-associated membrane glycoprotein 2 OS=Homo sapiens GN=LAMP2 PE=1 SV=2	3D-structure;Alternative splicing;Autophagy;Cell membrane;Complete proteome;Cytoplasmic vesicle;Direct protein sequencing;Disease mutation;Disulfide bond;Endosome;Glycogen storage disease;Glycoprotein;Lysosome;Membrane;Polymorphism;Reference proteome;Signal;Transmembrane;Transmembrane helix;	;;;	;	;K06528;;	K06528;	UniRef50_P13473	UniRef90_P13473	UniRef100_P13473	Eukaryota	Metazoa	unknown	Mammalia	Primates	Hominidae	Homo	Homo sapiens	Homo sapiens	18	0	0	0	0	0	0	0	0	0	0	0	0	0	0	0	0	0	0	2	2	0	0	0	2	1	2	1	2	2	1
Meta-Protein 4665	Metagenome Unknown		;;		;;					Uncategorized	Uncategorized	unknown	Uncategorized	Uncategorized	Uncategorized	Uncategorized	Uncategorized	Uncategorized	1	0	0	0	0	0	0	0	0	0	0	0	0	0	0	0	0	0	0	0	0	0	1	0	0	0	0	0	0	0	0
Meta-Protein 2194	BLAST_SYQ_ENT38 Glutamine--tRNA ligase OS=Enterobacter sp. (strain 638) GN=glnS PE=3 SV=1_A4W846	ATP-binding;Aminoacyl-tRNA synthetase;Complete proteome;Cytoplasm;Ligase;Nucleotide-binding;Protein biosynthesis;Reference proteome;	;6.1.1.18;;	6.1.1.18;	;K01886;;	K01886;	UniRef50_P57000	UniRef90_Q7UX42	UniRef100_Q7UX42	Bacteria	Bacteria	unknown	Bacteria	Bacteria	Bacteria	Bacteria	Bacteria	Bacteria	1	0	0	0	0	0	0	0	0	0	0	0	0	0	0	0	0	0	0	0	0	0	0	1	0	0	0	0	0	0	0
Meta-Protein 2869	Metagenome unknown		;;		;;					Uncategorized	Uncategorized	unknown	Uncategorized	Uncategorized	Uncategorized	Uncategorized	Uncategorized	Uncategorized	9	2	3	3	0	0	0	0	0	0	1	0	0	0	0	0	0	0	0	0	0	0	0	0	0	0	0	0	0	0	0
Meta-Protein 3159	Metagenome unknown		;;		;;					Uncategorized	Uncategorized	unknown	Uncategorized	Uncategorized	Uncategorized	Uncategorized	Uncategorized	Uncategorized	11	4	1	1	3	1	0	1	0	0	0	0	0	0	0	0	0	0	0	0	0	0	0	0	0	0	0	0	0	0	0
Meta-Protein 3632	Metagenome unknown		;;		;;					Uncategorized	Uncategorized	unknown	Uncategorized	Uncategorized	Uncategorized	Uncategorized	Uncategorized	Uncategorized	8	0	0	0	3	3	2	0	0	0	0	0	0	0	0	0	0	0	0	0	0	0	0	0	0	0	0	0	0	0	0
Meta-Protein 3288	BLAST_DPPD_HAEIN Dipeptide transport ATP-binding protein DppD OS=Haemophilus influenzae (strain ATCC 51907 / DSM 11121 / KW20 / Rd) GN=dppD PE=3 SV=1_P45095	ATP-binding;Cell inner membrane;Cell membrane;Complete proteome;Membrane;Nucleotide-binding;Peptide transport;Protein transport;Reference proteome;Transport;	;;;	;	;K12371;;	K12371;	UniRef50_P45095	UniRef90_P45095	UniRef100_P45095	Bacteria	Haemophilus influenzae Rd KW20	unknown	Gammaproteobacteria	Pasteurellales	Pasteurellaceae	Haemophilus	Haemophilus influenzae	Haemophilus influenzae Rd KW20	2	2	0	0	0	0	0	0	0	0	0	0	0	0	0	0	0	0	0	0	0	0	0	0	0	0	0	0	0	0	0
Meta-Protein 4452	ILVC_SYNP2 Ketol-acid reductoisomerase (NADP(+)) OS=Synechococcus sp. (strain ATCC 27264 / PCC 7002 / PR-6) GN=ilvC PE=3 SV=1	Amino-acid biosynthesis;Branched-chain amino acid biosynthesis;Complete proteome;Magnesium;Metal-binding;NADP;Nucleotide-binding;Oxidoreductase;Reference proteome;	;1.1.1.86;;	1.1.1.86;	;K00053;;	K00053;	UniRef50_C1DFH7	UniRef90_B1XL20	UniRef100_B1XL20	Bacteria	Synechococcus sp. PCC 7002	unknown	Synechococcus sp. PCC 7002	Chroococcales	Synechococcus sp. PCC 7002	Synechococcus	Synechococcus sp. PCC 7002	Synechococcus sp. PCC 7002	1	0	0	0	0	0	0	0	0	0	0	0	0	0	0	0	0	0	0	0	1	0	0	0	0	0	0	0	0	0	0
Meta-Protein 634	BLAST_MALC_STRPN Maltodextrin transport system permease protein MalC OS=Streptococcus pneumoniae serotype 4 (strain ATCC BAA-334 / TIGR4) GN=malC PE=3 SV=1_P0A4N1	Cell membrane;Complete proteome;Membrane;Reference proteome;Sugar transport;Transmembrane;Transmembrane helix;Transport;	;;;	;	;K15771;;	K15771;	UniRef50_P0A4N1	UniRef90_P0A4N1	UniRef100_P0A4N1	Bacteria	Streptococcus pneumoniae	unknown	Bacilli	Lactobacillales	Streptococcaceae	Streptococcus	Streptococcus pneumoniae	Streptococcus pneumoniae	9	5	3	0	0	1	0	0	0	0	0	0	0	0	0	0	0	0	0	0	0	0	0	0	0	0	0	0	0	0	0
Meta-Protein 3816	BLAST_RSBW_STAAB Serine-protein kinase RsbW OS=Staphylococcus aureus (strain bovine RF122 / ET3-1) GN=rsbW PE=3 SV=1_Q2YUI8	ATP-binding;Kinase;Nucleotide-binding;Serine/threonine-protein kinase;Transferase;	;2.7.11.1;;	2.7.11.1;	;K04757;;	K04757;	UniRef50_P17904	UniRef90_Q2YUI8	UniRef100_Q2YUI8	Bacteria	Staphylococcus aureus	unknown	Bacilli	Bacillales	Staphylococcaceae	Staphylococcus	Staphylococcus aureus	Staphylococcus aureus	1	0	0	0	0	1	0	0	0	0	0	0	0	0	0	0	0	0	0	0	0	0	0	0	0	0	0	0	0	0	0
Meta-Protein 2275	DHE3_THEMA Glutamate dehydrogenase OS=Thermotoga maritima (strain ATCC 43589 / MSB8 / DSM 3109 / JCM 10099) GN=gdhA PE=1 SV=4	3D-structure;Complete proteome;Direct protein sequencing;NAD;NADP;Oxidoreductase;Reference proteome;	;1.4.1.2;1.4.1.3;;	1.4.1.2;1.4.1.3;	;;K00261;;	;K00261;	EMPTY	EMPTY	EMPTY	Bacteria	Bacteria	unknown	Bacteria	Bacteria	Bacteria	Bacteria	Bacteria	Bacteria	40	0	0	0	0	0	0	0	0	0	0	0	0	0	0	0	0	0	0	0	0	0	0	0	0	7	5	12	0	0	0
Meta-Protein 1348	BLAST_PYRF_BACV8 Orotidine 5-phosphate decarboxylase OS=Bacteroides vulgatus (strain ATCC 8482 / DSM 1447 / JCM 5826 / NBRC 14291 / NCTC 11154) GN=pyrF PE=3 SV=1_A6KWL1	Complete proteome;Decarboxylase;Lyase;Pyrimidine biosynthesis;Reference proteome;	;4.1.1.23;;	4.1.1.23;	;K01591;;	K01591;	UniRef50_Q5LH12	UniRef90_A6KWL1	UniRef100_A6KWL1	Bacteria	Bacteroides	unknown	Bacteroidia	Bacteroidales	Bacteroidaceae	Bacteroides	Bacteroides	Bacteroides	5	0	0	0	0	0	0	0	0	0	0	0	0	0	0	0	0	0	0	1	2	0	0	0	2	0	0	0	0	0	0
Meta-Protein 2763	BLAST_SLAP2_THET8 S-layer protein OS=Thermus thermophilus (strain HB8 / ATCC 27634 / DSM 579) GN=slpA PE=3 SV=1_P35830	Cell wall;S-layer;Secreted;Signal;	;;;	;	;;;	;	UniRef50_P35830	UniRef90_P35830	UniRef100_P35830	Bacteria	Thermus thermophilus HB8	unknown	Deinococci	Thermales	Thermaceae	Thermus	Thermus thermophilus	Thermus thermophilus HB8	57	6	4	5	8	7	6	8	7	4	2	0	0	0	0	0	0	0	0	0	0	0	0	0	0	0	0	0	0	0	0
Meta-Protein 4176	Metagenome unknown		;;		;;					Uncategorized	Uncategorized	unknown	Uncategorized	Uncategorized	Uncategorized	Uncategorized	Uncategorized	Uncategorized	3	0	0	0	0	0	0	0	0	0	2	0	1	0	0	0	0	0	0	0	0	0	0	0	0	0	0	0	0	0	0
Meta-Protein 3106	BLAST_FDNGA_DESVH Formate dehydrogenase 2 subunit alpha (cytochrome c-553) OS=Desulfovibrio vulgaris (strain Hildenborough / ATCC 29579 / DSM 644 / NCIMB 8303) GN=fdnG-3 PE=1 SV=2_Q727P3	4Fe-4S;Calcium;Complete proteome;Direct protein sequencing;Electron transport;Iron;Iron-sulfur;Metal-binding;Oxidoreductase;Periplasm;Reference proteome;Selenium;Selenocysteine;Signal;Transport;Tungsten;	;1.17.2.3;;	1.17.2.3;	;K00123;;	K00123;	UniRef50_Q727P3	UniRef90_Q727P3	UniRef100_Q727P3	Bacteria	Desulfovibrio vulgaris str. Hildenborough	unknown	Deltaproteobacteria	Desulfovibrionales	Desulfovibrionaceae	Desulfovibrio	Desulfovibrio vulgaris	Desulfovibrio vulgaris str. Hildenborough	2	1	1	0	0	0	0	0	0	0	0	0	0	0	0	0	0	0	0	0	0	0	0	0	0	0	0	0	0	0	0
Meta-Protein 3712	BLAST_FLGH_SYNAS Flagellar L-ring protein OS=Syntrophus aciditrophicus (strain SB) GN=flgH PE=3 SV=2_Q2LT21	Bacterial flagellum;Cell outer membrane;Complete proteome;Lipoprotein;Membrane;Palmitate;Reference proteome;Signal;	;;;	;	;K02393;;	K02393;	UniRef50_Q2LT21	UniRef90_Q2LT21	UniRef100_Q2LT21	Bacteria	Syntrophus aciditrophicus SB	unknown	Deltaproteobacteria	Syntrophobacterales	Syntrophaceae	Syntrophus	Syntrophus aciditrophicus	Syntrophus aciditrophicus SB	1	0	0	0	1	0	0	0	0	0	0	0	0	0	0	0	0	0	0	0	0	0	0	0	0	0	0	0	0	0	0
Meta-Protein 2472	BLAST_SCRK7_ARATH Probable fructokinase-7 OS=Arabidopsis thaliana GN=At5g51830 PE=1 SV=1_Q9FLH8	ATP-binding;Acetylation;Carbohydrate metabolism;Chloroplast;Complete proteome;Direct protein sequencing;Kinase;Nucleotide-binding;Plastid;Reference proteome;Transferase;Transit peptide;	;2.7.1.4;;	2.7.1.4;	;;K00847;;	;K00847;	EMPTY	UniRef90_Q9C524	UniRef100_Q9C524	Eukaryota	Viridiplantae	unknown	Magnoliophyta	Magnoliophyta	Magnoliophyta	Magnoliophyta	Magnoliophyta	Magnoliophyta	5	0	0	0	0	0	0	0	0	0	0	0	0	0	0	0	0	0	0	0	0	0	0	0	0	0	2	0	0	0	0
Meta-Protein 1110	BLAST_YFUM2_GEOSE Uncharacterized 30.6 kDa protein in fumA 3region OS=Geobacillus stearothermophilus PE=3 SV=1_Q04729	Hydrolase;Signal;	;3.5.1.-;;	3.5.1.-;	;;;	;	UniRef50_Q04729	UniRef90_Q04729	UniRef100_Q04729	Bacteria	Geobacillus stearothermophilus	unknown	Bacilli	Bacillales	Bacillaceae	Geobacillus	Geobacillus stearothermophilus	Geobacillus stearothermophilus	3	0	0	0	0	0	0	2	1	0	0	0	0	0	0	0	0	0	0	0	0	0	0	0	0	0	0	0	0	0	0
Meta-Protein 3428	BLAST_SLAP1_THET8 S-layer protein OS=Thermus thermophilus (strain HB8 / ATCC 27634 / DSM 579) GN=slpA PE=3 SV=1_Q5SH37	Cell wall;Complete proteome;Reference proteome;S-layer;Secreted;Signal;	;;;	;	;;;	;	UniRef50_Q5SH37	UniRef90_Q5SH37	UniRef100_Q5SH37	Bacteria	Thermus thermophilus HB8	unknown	Deinococci	Thermales	Thermaceae	Thermus	Thermus thermophilus	Thermus thermophilus HB8	18	0	1	0	1	3	0	3	3	7	0	0	0	0	0	0	0	0	0	0	0	0	0	0	0	0	0	0	0	0	0
Meta-Protein 2231	Metagenome Unknown		;;		;;					Uncategorized	Uncategorized	unknown	Uncategorized	Uncategorized	Uncategorized	Uncategorized	Uncategorized	Uncategorized	1	0	0	0	0	0	0	0	0	0	0	0	0	0	0	0	0	0	0	0	0	0	0	0	1	0	0	0	0	0	0
Meta-Protein 1471	BLAST_HBD_CLOAB 3-hydroxybutyryl-CoA dehydrogenase OS=Clostridium acetobutylicum (strain ATCC 824 / DSM 792 / JCM 1419 / LMG 5710 / VKM B-1787) GN=hbd PE=1 SV=2_P52041	Complete proteome;Fatty acid metabolism;Lipid metabolism;NADP;Oxidoreductase;Reference proteome;	;1.1.1.157;;	1.1.1.157;	;K00074;;	K00074;	UniRef50_Q0AVM2	UniRef90_P52041	UniRef100_P52041	Bacteria	Bacteria	unknown	Bacteria	Bacteria	Bacteria	Bacteria	Bacteria	Bacteria	212	0	0	0	0	0	0	0	0	0	0	0	0	0	0	0	0	0	0	13	13	11	12	11	10	31	29	30	4	0	3
Meta-Protein 4904	BLAST_YQKD_BACSU Uncharacterized protein YqkD OS=Bacillus subtilis (strain 168) GN=yqkD PE=4 SV=1_P54567	Complete proteome;Membrane;Reference proteome;Transmembrane;Transmembrane helix;	;;;	;	;K06889;;	K06889;	UniRef50_P54567	UniRef90_P54567	UniRef100_P54567	Bacteria	Bacillus subtilis subsp. subtilis str. 168	unknown	Bacilli	Bacillales	Bacillaceae	Bacillus	Bacillus subtilis subsp. subtilis str. 168	Bacillus subtilis subsp. subtilis	1	0	0	0	0	0	0	0	0	0	0	0	0	0	0	0	0	0	0	0	0	0	0	0	0	0	1	0	0	0	0
Meta-Protein 4146	BLAST_LPXK_BACFN Tetraacyldisaccharide 4-kinase OS=Bacteroides fragilis (strain ATCC 25285 / DSM 2151 / JCM 11019 / NCTC 9343) GN=lpxK PE=3 SV=1_Q5LAA4	ATP-binding;Complete proteome;Kinase;Lipid A biosynthesis;Lipid biosynthesis;Lipid metabolism;Nucleotide-binding;Reference proteome;Transferase;	;2.7.1.130;;	2.7.1.130;	;K00912;;	K00912;	UniRef50_Q5LAA4	UniRef90_Q5LAA4	UniRef100_Q5LAA4	Bacteria	Bacteroides fragilis NCTC 9343	unknown	Bacteroidia	Bacteroidales	Bacteroidaceae	Bacteroides	Bacteroides fragilis	Bacteroides fragilis NCTC 9343	1	0	0	0	0	0	0	0	0	0	0	0	0	0	0	0	0	0	1	0	0	0	0	0	0	0	0	0	0	0	0
Meta-Protein 2050	MYG_SHEEP Myoglobin OS=Ovis aries GN=MB PE=1 SV=2	3D-structure;Complete proteome;Direct protein sequencing;Heme;Iron;Metal-binding;Muscle protein;Oxygen transport;Phosphoprotein;Reference proteome;Transport;	;;;	;	;;K21892;;	;K21892;	EMPTY	EMPTY	UniRef100_P02189	Eukaryota	Metazoa	unknown	Mammalia	Eutheria	Eutheria	Eutheria	Eutheria	Eutheria	7	0	0	0	0	0	0	0	0	0	0	0	0	0	0	0	0	0	0	0	0	1	3	1	0	2	0	0	0	0	0
Meta-Protein 1514	BLAST_GAL1_CLOB8 Galactokinase OS=Clostridium beijerinckii (strain ATCC 51743 / NCIMB 8052) GN=galK PE=3 SV=1_A6M1P8	3D-structure;ATP-binding;Alternative splicing;Carbohydrate metabolism;Cataract;Complete proteome;Cytoplasm;Direct protein sequencing;Disease mutation;Galactose metabolism;Kinase;Magnesium;Metal-binding;Nucleotide-binding;Phosphoprotein;Polymorphism;Reference proteome;Transferase;	;2.7.1.6;;	2.7.1.6;	;;K00849;K18674;;	;K00849;K18674;	EMPTY	UniRef90_Q9KRP1	UniRef100_Q9KRP1	cellular organisms	cellular organisms	unknown	cellular organisms	cellular organisms	cellular organisms	cellular organisms	cellular organisms	cellular organisms	44	0	0	0	0	0	0	0	0	0	0	0	0	0	0	0	0	0	0	6	7	2	8	4	4	4	0	3	1	1	2
Meta-Protein 3606	Metagenome unknown		;;		;;					Uncategorized	Uncategorized	unknown	Uncategorized	Uncategorized	Uncategorized	Uncategorized	Uncategorized	Uncategorized	10	0	0	0	1	1	2	2	0	1	1	1	0	0	0	0	0	1	0	0	0	0	0	0	0	0	0	0	0	0	0
Meta-Protein 3132	BLAST_YCO4_PARDE Uncharacterized protein 4 in cox locus OS=Paracoccus denitrificans PE=4 SV=1_P08304	;	;;;	;	;;;	;	UniRef50_P08304	UniRef90_P08304	UniRef100_P08304	Bacteria	Paracoccus denitrificans	unknown	Alphaproteobacteria	Rhodobacterales	Rhodobacteraceae	Paracoccus	Paracoccus denitrificans	Paracoccus denitrificans	2	1	0	1	0	0	0	0	0	0	0	0	0	0	0	0	0	0	0	0	0	0	0	0	0	0	0	0	0	0	0
Meta-Protein 4585	BLAST_ACKA_BACTN Acetate kinase OS=Bacteroides thetaiotaomicron (strain ATCC 29148 / DSM 2079 / NCTC 10582 / E50 / VPI-5482) GN=ackA PE=3 SV=1_Q8A1G8	ATP-binding;Complete proteome;Cytoplasm;Kinase;Magnesium;Metal-binding;Nucleotide-binding;Reference proteome;Transferase;	;2.7.2.1;;	2.7.2.1;	;K00925;;	K00925;	EMPTY	EMPTY	EMPTY	Bacteria	Bacteroides	unknown	Bacteroidia	Bacteroidales	Bacteroidaceae	Bacteroides	Bacteroides	Bacteroides	3	0	0	0	0	0	0	0	0	0	0	0	0	0	0	0	0	0	0	0	0	1	1	0	0	0	0	0	0	0	0
Meta-Protein 2780	Metagenome unknown		;;		;;					Uncategorized	Uncategorized	unknown	Uncategorized	Uncategorized	Uncategorized	Uncategorized	Uncategorized	Uncategorized	36	11	8	4	0	0	0	0	0	0	4	3	6	0	0	0	0	0	0	0	0	0	0	0	0	0	0	0	0	0	0
Meta-Protein 4207	BLAST_PHNS_SALPA Putative 2-aminoethylphosphonate-binding periplasmic protein OS=Salmonella paratyphi A (strain ATCC 9150 / SARB42) GN=phnS PE=3 SV=1_Q5PFQ8	Complete proteome;Periplasm;Signal;Transport;	;;;	;	;K11081;;	K11081;	UniRef50_P96062	UniRef90_P96062	UniRef100_Q5PFQ8	Bacteria	Salmonella enterica subsp. enterica serovar Paratyphi A str. ATCC 9150	unknown	Gammaproteobacteria	Enterobacteriales	Enterobacteriaceae	Salmonella	Salmonella enterica subsp. enterica serovar Paratyphi A str. ATCC 9150	Salmonella enterica subsp. enterica	1	0	0	0	0	0	0	0	0	0	1	0	0	0	0	0	0	0	0	0	0	0	0	0	0	0	0	0	0	0	0
Meta-Protein 941	BLAST_Y574_MYCA1 Uncharacterized tRNA/rRNA methyltransferase MAV_0574 OS=Mycobacterium avium (strain 104) GN=MAV_0574 PE=3 SV=1_A0QAB6	Complete proteome;Cytoplasm;DNA integration;DNA recombination;DNA-binding;GTP-binding;Hydrolase;Magnesium;Metal-binding;Methyltransferase;Nucleotide-binding;Potassium;Reference proteome;S-adenosyl-L-methionine;Transferase;tRNA processing;	;;2.1.1.-;3.6.-.-;;	;2.1.1.-;3.6.-.-;	;K03218;K03650;K04763;;	K03218;K03650;K04763;	UniRef50_A4XN51	UniRef90_A4XN51	UniRef100_A4XN51	cellular organisms	cellular organisms	unknown	cellular organisms	cellular organisms	cellular organisms	cellular organisms	cellular organisms	cellular organisms	4	0	0	0	1	0	1	1	0	0	0	0	0	1	0	0	0	0	0	0	0	0	0	0	0	0	0	0	0	0	0
Meta-Protein 2928	BLAST_VORA_METTH Ketoisovalerate oxidoreductase subunit VorA OS=Methanothermobacter thermautotrophicus (strain ATCC 29096 / DSM 1053 / JCM 10044 / NBRC 100330 / Delta H) GN=vorA PE=3 SV=3_O26801	Complete proteome;Oxidoreductase;Reference proteome;	;1.2.7.7;;	1.2.7.7;	;K00187;;	K00187;	UniRef50_P80907	UniRef90_P80907	UniRef100_O26801	Archaea	Methanothermobacter thermautotrophicus str. Delta H	unknown	Methanobacteria	Methanobacteriales	Methanobacteriaceae	Methanothermobacter	Methanothermobacter thermautotrophicus	Methanothermobacter thermautotrophicus str. Delta H	7	1	2	1	0	0	0	0	0	0	1	1	1	0	0	0	0	0	0	0	0	0	0	0	0	0	0	0	0	0	0
Meta-Protein 1483	PIGR_HUMAN Polymeric immunoglobulin receptor OS=Homo sapiens GN=PIGR PE=1 SV=4	3D-structure;Cell membrane;Complete proteome;Direct protein sequencing;Disulfide bond;Glycoprotein;Immunoglobulin domain;Membrane;Phosphoprotein;Polymorphism;Reference proteome;Repeat;Secreted;Signal;Transmembrane;Transmembrane helix;	;;;	;	;K13073;;	K13073;	UniRef50_P01833	UniRef90_P01833	UniRef100_P01833	Eukaryota	Metazoa	unknown	Mammalia	Primates	Hominidae	Homo	Homo sapiens	Homo sapiens	315	0	0	0	0	0	0	0	0	0	0	0	0	0	0	0	0	0	0	14	9	17	26	17	9	32	45	24	6	7	5
Meta-Protein 664	BLAST_YIAO_ECOLI 2,3-diketo-L-gulonate-binding periplasmic protein YiaO OS=Escherichia coli (strain K12) GN=yiaO PE=1 SV=1_P37676	3D-structure;Complete proteome;Periplasm;Reference proteome;Signal;Sugar transport;Transport;	;;;	;	;;K21395;;	;K21395;	EMPTY	EMPTY	UniRef100_P37676	Bacteria	Gammaproteobacteria	unknown	Gammaproteobacteria	Gammaproteobacteria	Gammaproteobacteria	Gammaproteobacteria	Gammaproteobacteria	Gammaproteobacteria	14	2	2	2	2	1	2	2	0	0	1	0	0	0	0	0	0	0	0	0	0	0	0	0	0	0	0	0	0	0	0
Meta-Protein 3326	BLAST_REE1_YEAST Regulation of enolase protein 1 OS=Saccharomyces cerevisiae (strain ATCC 204508 / S288c) GN=REE1 PE=1 SV=1_P40893	3D-structure;Complete proteome;Cytoplasm;Reference proteome;	;;;	;	;K09702;;	K09702;	UniRef50_P40893	UniRef90_P40893	UniRef100_P40893	Eukaryota	Fungi	unknown	Saccharomycetes	Saccharomycetales	Saccharomycetaceae	Saccharomyces	Saccharomyces cerevisiae	Saccharomyces cerevisiae S288c	1	0	1	0	0	0	0	0	0	0	0	0	0	0	0	0	0	0	0	0	0	0	0	0	0	0	0	0	0	0	0
Meta-Protein 1847	Metagenome Unknown	Cell outer membrane;Ion transport;Membrane;Porin;Signal;Transmembrane;Transmembrane beta strand;Transport;	;;;	;	;;;	;	UniRef50_P18195	UniRef90_P05430	UniRef100_P05430	Bacteria	Neisseria gonorrhoeae	unknown	Betaproteobacteria	Neisseriales	Neisseriaceae	Neisseria	Neisseria gonorrhoeae	Neisseria gonorrhoeae	2	0	0	0	0	0	0	0	0	0	0	0	0	0	0	0	0	0	0	0	1	0	0	0	1	0	0	0	0	0	0
Meta-Protein 2118	Metagenome Unknown	Calcium;Complete proteome;Direct protein sequencing;Disulfide bond;Lyase;Metal-binding;Reference proteome;Secreted;Signal;	;4.2.2.2;;	4.2.2.2;	;K01728;;	K01728;	UniRef50_P11073	UniRef90_Q6CZT4	UniRef100_Q6CZT4	Bacteria	Pectobacterium atrosepticum SCRI1043	unknown	Gammaproteobacteria	Enterobacteriales	Enterobacteriaceae	Pectobacterium	Pectobacterium atrosepticum	Pectobacterium atrosepticum SCRI1043	2	0	0	0	0	0	0	0	0	0	0	0	0	0	0	0	0	0	0	0	0	0	1	1	0	0	0	0	0	0	0
Meta-Protein 1959	BLAST_KV315_HUMAN Immunoglobulin kappa variable 3-15 OS=Homo sapiens GN=IGKV3-15 PE=1 SV=2_P01624	Adaptive immunity;Cell membrane;Complete proteome;Direct protein sequencing;Disulfide bond;Immunity;Immunoglobulin V region;Immunoglobulin domain;Membrane;Polymorphism;Reference proteome;Secreted;Signal;	;;;	;	;;;	;	UniRef50_P01624	UniRef90_P01624	EMPTY	Eukaryota	Metazoa	unknown	Mammalia	Primates	Hominidae	Homo	Homo sapiens	Homo sapiens	9	0	0	0	0	0	0	0	0	0	0	0	0	0	0	0	0	0	0	0	0	1	0	0	0	2	3	1	0	0	0
Meta-Protein 4425	BLAST_ARAA_BACV8 L-arabinose isomerase OS=Bacteroides vulgatus (strain ATCC 8482 / DSM 1447 / JCM 5826 / NBRC 14291 / NCTC 11154) GN=araA PE=3 SV=1_A6L2R5	Arabinose catabolism;Carbohydrate metabolism;Complete proteome;Isomerase;Manganese;Metal-binding;Reference proteome;	;5.3.1.4;;	5.3.1.4;	;K01804;;	K01804;	UniRef50_Q8AAW1	UniRef90_Q8AAW1	UniRef100_A6L2R5	Bacteria	Bacteroides vulgatus ATCC 8482	unknown	Bacteroidia	Bacteroidales	Bacteroidaceae	Bacteroides	Bacteroides vulgatus	Bacteroides vulgatus ATCC 8482	4	0	0	0	0	0	0	0	0	0	0	0	0	0	0	0	0	0	0	2	2	0	0	0	0	0	0	0	0	0	0
Meta-Protein 3304	Metagenome unknown		;;		;;					Uncategorized	Uncategorized	unknown	Uncategorized	Uncategorized	Uncategorized	Uncategorized	Uncategorized	Uncategorized	5	1	1	1	0	1	0	1	0	0	0	0	0	0	0	0	0	0	0	0	0	0	0	0	0	0	0	0	0	0	0
Meta-Protein 2405	BLAST_EFG_CLOTE Elongation factor G OS=Clostridium tetani (strain Massachusetts / E88) GN=fusA PE=3 SV=1_Q890N8	Complete proteome;Cytoplasm;Elongation factor;GTP-binding;Nucleotide-binding;Protein biosynthesis;Reference proteome;	;;;	;	;K02355;;	K02355;	UniRef50_P56002	EMPTY	EMPTY	Bacteria	Bacteria	unknown	Bacteria	Bacteria	Bacteria	Bacteria	Bacteria	Bacteria	2	0	0	0	0	0	0	0	0	0	0	0	0	0	0	0	0	0	0	0	0	0	0	0	0	1	0	0	0	0	0
Meta-Protein 2659	BLAST_ARGT_ECOLI Lysine/arginine/ornithine-binding periplasmic protein OS=Escherichia coli (strain K12) GN=argT PE=1 SV=3_P09551	3D-structure;Amino-acid transport;Cell inner membrane;Cell membrane;Complete proteome;Direct protein sequencing;Disulfide bond;Membrane;Periplasm;Phosphoprotein;Reference proteome;Signal;Transmembrane;Transmembrane helix;Transport;	;;;	;	;K10013;K10016;;	K10013;K10016;	EMPTY	EMPTY	UniRef100_P52094	Bacteria	Enterobacteriaceae	unknown	Gammaproteobacteria	Enterobacteriales	Enterobacteriaceae	Enterobacteriaceae	Enterobacteriaceae	Enterobacteriaceae	1	0	0	0	0	0	0	0	0	0	0	0	0	0	0	0	0	0	0	0	0	0	0	0	0	0	0	0	0	0	0
Meta-Protein 2975	Metagenome unknown		;;		;;					Uncategorized	Uncategorized	unknown	Uncategorized	Uncategorized	Uncategorized	Uncategorized	Uncategorized	Uncategorized	3	2	1	0	0	0	0	0	0	0	0	0	0	0	0	0	0	0	0	0	0	0	0	0	0	0	0	0	0	0	0
Meta-Protein 4262	BLAST_THIL_CHRVO Acetyl-CoA acetyltransferase OS=Chromobacterium violaceum (strain ATCC 12472 / DSM 30191 / JCM 1249 / NBRC 12614 / NCIMB 9131 / NCTC 9757) GN=phaA PE=3 SV=2_Q9ZHI1	Acyltransferase;Complete proteome;Cytoplasm;PHA biosynthesis;Reference proteome;Transferase;	;2.3.1.9;;	2.3.1.9;	;K00626;;	K00626;	UniRef50_Q9BWD1	UniRef90_Q9ZHI1	UniRef100_Q9ZHI1	Bacteria	Chromobacterium violaceum ATCC 12472	unknown	Betaproteobacteria	Neisseriales	Neisseriaceae	Chromobacterium	Chromobacterium violaceum	Chromobacterium violaceum ATCC 12472	1	0	0	0	0	0	0	0	0	0	0	1	0	0	0	0	0	0	0	0	0	0	0	0	0	0	0	0	0	0	0
Meta-Protein 4696	BLAST_DBHA_PSEAE DNA-binding protein HU-alpha OS=Pseudomonas aeruginosa (strain ATCC 15692 / DSM 22644 / CIP 104116 / JCM 14847 / LMG 12228 / 1C / PRS 101 / PAO1) GN=hupA PE=3 SV=1_Q9HTL0	Complete proteome;DNA condensation;DNA-binding;Reference proteome;	;;;	;	;K05787;;	K05787;	UniRef50_Q9HTL0	UniRef90_Q9HTL0	UniRef100_Q9HTL0	Bacteria	Pseudomonas aeruginosa PAO1	unknown	Gammaproteobacteria	Pseudomonadales	Pseudomonadaceae	Pseudomonas	Pseudomonas aeruginosa	Pseudomonas aeruginosa PAO1	2	0	0	0	0	0	0	0	0	0	0	0	0	0	0	0	0	0	0	0	0	0	1	0	1	0	0	0	0	0	0
Meta-Protein 175	BLAST_LEMA_METJA Protein LemA OS=Methanocaldococcus jannaschii (strain ATCC 43067 / DSM 2661 / JAL-1 / JCM 10045 / NBRC 100440) GN=lemA PE=3 SV=1_Q58971	Cell membrane;Coiled coil;Complete proteome;Membrane;Reference proteome;Transmembrane;Transmembrane helix;	;;;	;	;K03744;;	K03744;	UniRef50_Q58971	UniRef90_Q58971	UniRef100_Q58971	cellular organisms	cellular organisms	unknown	cellular organisms	cellular organisms	cellular organisms	cellular organisms	cellular organisms	cellular organisms	6	1	0	2	1	0	1	0	0	0	0	1	0	0	0	0	0	0	0	0	0	0	0	0	0	0	0	0	0	0	0
Meta-Protein 1331	BLAST_RL29_BACTN 50S ribosomal protein L29 OS=Bacteroides thetaiotaomicron (strain ATCC 29148 / DSM 2079 / NCTC 10582 / E50 / VPI-5482) GN=rpmC PE=3 SV=1_Q8A484	Complete proteome;Reference proteome;Ribonucleoprotein;Ribosomal protein;	;;;	;	;K02904;;	K02904;	UniRef50_Q8A484	UniRef90_Q8A484	EMPTY	Bacteria	Bacteroides	unknown	Bacteroidia	Bacteroidales	Bacteroidaceae	Bacteroides	Bacteroides	Bacteroides	1	0	0	0	0	0	0	0	0	0	0	0	0	0	0	0	0	0	0	1	0	0	0	0	0	0	0	0	0	0	0
Meta-Protein 3526	Metagenome unknown		;;		;;					Uncategorized	Uncategorized	unknown	Uncategorized	Uncategorized	Uncategorized	Uncategorized	Uncategorized	Uncategorized	7	0	0	1	1	2	1	0	0	0	0	0	1	0	0	0	1	0	0	0	0	0	0	0	0	0	0	0	0	0	0
Meta-Protein 3248	BLAST_CAR_HALS3 Transducer protein Car OS=Halobacterium salinarum (strain ATCC 29341 / DSM 671 / R1) GN=car PE=1 SV=1_B0R9Z1	Chemotaxis;Complete proteome;Cytoplasm;Methylation;Plasmid;Transducer;	;;;	;	;;;	;	UniRef50_B0R9Z1	UniRef90_B0R9Z1	UniRef100_B0R9Z1	Archaea	Halobacterium salinarum R1	unknown	Halobacteria	Halobacteriales	Halobacteriaceae	Halobacterium	Halobacterium salinarum	Halobacterium salinarum R1	88	5	6	5	5	5	5	5	4	5	7	6	6	3	5	4	5	2	5	0	0	0	0	0	0	0	0	0	0	0	0
Meta-Protein 3662	BLAST_CAPSD_BPSPP Major capsid protein OS=Bacillus phage SPP1 GN=13 PE=1 SV=1_Q38582	3D-structure;Capsid protein;Complete proteome;Reference proteome;T=7 icosahedral capsid protein;Virion;	;;;	;	;;;	;	UniRef50_Q38582	UniRef90_Q38582	UniRef100_Q38582	Viruses	Bacillus phage SPP1	unknown	Bacillus phage SPP1	Caudovirales	Siphoviridae	Lambdalikevirus	Bacillus phage SPP1	Bacillus phage SPP1	27	0	0	0	7	6	3	3	4	3	0	0	0	0	0	0	1	0	0	0	0	0	0	0	0	0	0	0	0	0	0
Meta-Protein 4869	BLAST_POTA_MYCPN Spermidine/putrescine import ATP-binding protein PotA OS=Mycoplasma pneumoniae (strain ATCC 29342 / M129) GN=potA PE=3 SV=1_P75059	ATP-binding;Cell membrane;Complete proteome;Hydrolase;Membrane;Nucleotide-binding;Reference proteome;Transport;	;3.6.3.31;;	3.6.3.31;	;K11072;;	K11072;	UniRef50_P75059	UniRef90_P75059	UniRef100_P75059	Bacteria	Mycoplasma pneumoniae M129	unknown	Mollicutes	Mycoplasmatales	Mycoplasmataceae	Mycoplasma	Mycoplasma pneumoniae	Mycoplasma pneumoniae M129	4	0	0	0	0	0	0	0	0	0	0	0	0	0	0	0	0	0	0	0	0	0	0	0	0	2	0	2	0	0	0
Meta-Protein 4282	BLAST_MDR4_ENTHI Multidrug resistance protein 4 (Fragment) OS=Entamoeba histolytica GN=MDR4 PE=3 SV=1_P16877	ATP-binding;Membrane;Nucleotide-binding;Repeat;Transmembrane;Transport;	;;;	;	;;;	;	UniRef50_P16877	UniRef90_P16877	UniRef100_P16877	Eukaryota	Entamoeba histolytica	unknown	Entamoeba histolytica	Entamoeba histolytica	Entamoeba histolytica	Entamoeba	Entamoeba histolytica	Entamoeba histolytica	1	0	0	0	0	0	0	0	0	0	0	0	1	0	0	0	0	0	0	0	0	0	0	0	0	0	0	0	0	0	0
Meta-Protein 3659	BLAST_MTAA_METBA Methylcobamide:CoM methyltransferase MtaA OS=Methanosarcina barkeri GN=mtaA PE=1 SV=1_Q48927	Direct protein sequencing;Metal-binding;Methanogenesis;Methyltransferase;Transferase;Zinc;	;2.1.1.246;;	2.1.1.246;	;;;	;	UniRef50_Q48949	UniRef90_Q48949	UniRef100_Q48927	Archaea	Methanosarcina barkeri	unknown	Methanomicrobia	Methanosarcinales	Methanosarcinaceae	Methanosarcina	Methanosarcina barkeri	Methanosarcina barkeri	5	0	0	0	1	1	3	0	0	0	0	0	0	0	0	0	0	0	0	0	0	0	0	0	0	0	0	0	0	0	0
Meta-Protein 361	NIFJ_NOSS1 Pyruvate-flavodoxin oxidoreductase OS=Nostoc sp. (strain PCC 7120 / SAG 25.82 / UTEX 2576) GN=nifJ PE=2 SV=2	4Fe-4S;Complete proteome;Electron transport;Iron;Iron-sulfur;Metal-binding;Nitrogen fixation;Oxidoreductase;Reference proteome;Repeat;Transport;	;1.2.7.-;;	1.2.7.-;	;;K03737;;	;K03737;	EMPTY	EMPTY	EMPTY	cellular organisms	cellular organisms	unknown	cellular organisms	cellular organisms	cellular organisms	cellular organisms	cellular organisms	cellular organisms	72	6	6	4	5	1	1	2	2	1	5	4	4	0	0	0	2	2	2	2	1	2	2	0	0	3	4	2	0	1	0
Meta-Protein 1883	BLAST_KDGK_THET8 2-dehydro-3-deoxygluconokinase OS=Thermus thermophilus (strain HB8 / ATCC 27634 / DSM 579) GN=kdgK PE=1 SV=1_Q53W83	3D-structure;ATP-binding;Carbohydrate metabolism;Complete proteome;Kinase;Nucleotide-binding;Plasmid;Reference proteome;Transferase;	;2.7.1.45;;	2.7.1.45;	;K00874;;	K00874;	UniRef50_Q53W83	UniRef90_Q53W83	UniRef100_Q53W83	Bacteria	Thermus thermophilus HB8	unknown	Deinococci	Thermales	Thermaceae	Thermus	Thermus thermophilus	Thermus thermophilus HB8	5	0	0	0	0	0	0	0	0	0	0	0	0	0	0	0	0	0	0	0	0	1	1	1	0	1	0	0	0	0	0
Meta-Protein 2801	BLAST_PSTOM_PYRAB Stomatin homolog PYRAB06580 OS=Pyrococcus abyssi (strain GE5 / Orsay) GN=PYRAB06580 PE=3 SV=1_Q9V0Y1	Coiled coil;Complete proteome;Membrane;Transmembrane;Transmembrane helix;	;;;	;	;;;	;	UniRef50_O59180	UniRef90_O59180	UniRef100_Q9V0Y1	Archaea	Pyrococcus abyssi GE5	unknown	Thermococci	Thermococcales	Thermococcaceae	Pyrococcus	Pyrococcus abyssi	Pyrococcus abyssi GE5	20	1	0	0	0	0	1	1	1	0	3	3	3	0	0	0	3	3	1	0	0	0	0	0	0	0	0	0	0	0	0
Meta-Protein 4138	BLAST_GCST_MOOTA Aminomethyltransferase OS=Moorella thermoacetica (strain ATCC 39073 / JCM 9320) GN=gcvT PE=3 SV=1_Q2RH46	Aminotransferase;Complete proteome;Reference proteome;Transferase;	;2.1.2.10;;	2.1.2.10;	;K00605;;	K00605;	UniRef50_Q2RH46	UniRef90_Q2RH46	UniRef100_Q2RH46	Bacteria	Moorella thermoacetica ATCC 39073	unknown	Clostridia	Thermoanaerobacterales	Thermoanaerobacteraceae	Moorella	Moorella thermoacetica	Moorella thermoacetica ATCC 39073	1	0	0	0	0	0	0	0	0	0	0	0	0	0	0	0	0	1	0	0	0	0	0	0	0	0	0	0	0	0	0
Meta-Protein 5178	BLAST_LYTC_BACSU N-acetylmuramoyl-L-alanine amidase LytC OS=Bacillus subtilis (strain 168) GN=lytC PE=1 SV=1_Q02114	Cell wall;Cell wall biogenesis/degradation;Complete proteome;Direct protein sequencing;Hydrolase;Reference proteome;Repeat;Secreted;Signal;	;3.5.1.28;;	3.5.1.28;	;K01448;;	K01448;	UniRef50_Q02114	UniRef90_Q02114	UniRef100_Q02114	Bacteria	Bacillus subtilis subsp. subtilis str. 168	unknown	Bacilli	Bacillales	Bacillaceae	Bacillus	Bacillus subtilis subsp. subtilis str. 168	Bacillus subtilis subsp. subtilis	1	0	0	0	0	0	0	0	0	0	0	0	0	0	0	0	0	0	0	0	0	0	0	0	0	0	0	0	0	0	0
Meta-Protein 4496	Metagenome Unknown		;;		;;					Uncategorized	Uncategorized	unknown	Uncategorized	Uncategorized	Uncategorized	Uncategorized	Uncategorized	Uncategorized	1	0	0	0	0	0	0	0	0	0	0	0	0	0	0	0	0	0	0	0	1	0	0	0	0	0	0	0	0	0	0
Meta-Protein 1301	BLAST_NADC_BACSU Probable nicotinate-nucleotide pyrophosphorylase [carboxylating] OS=Bacillus subtilis (strain 168) GN=nadC PE=1 SV=2_P39666	Complete proteome;Direct protein sequencing;Glycosyltransferase;Pyridine nucleotide biosynthesis;Reference proteome;Stress response;Transferase;	;2.4.2.19;;	2.4.2.19;	;K00767;;	K00767;	EMPTY	EMPTY	EMPTY	cellular organisms	cellular organisms	unknown	cellular organisms	cellular organisms	cellular organisms	cellular organisms	cellular organisms	cellular organisms	1	0	0	0	0	0	0	0	0	0	0	0	1	0	0	0	0	0	0	0	0	0	0	0	0	0	0	0	0	0	0
Meta-Protein 1290	BLAST_FTSZ_BACHD Cell division protein FtsZ OS=Bacillus halodurans (strain ATCC BAA-125 / DSM 18197 / FERM 7344 / JCM 9153 / C-125) GN=ftsZ PE=3 SV=1_Q9K9T7	3D-structure;Cell cycle;Cell division;Complete proteome;Cytoplasm;GTP-binding;Nucleotide-binding;Reference proteome;Septation;	;;;	;	;K03531;;	K03531;	EMPTY	EMPTY	UniRef100_Q9K9T7	Bacteria	Bacillales	unknown	Bacilli	Bacillales	Bacillales	Bacillales	Bacillales	Bacillales	1	0	0	0	0	0	0	0	0	0	0	1	0	0	0	0	0	0	0	0	0	0	0	0	0	0	0	0	0	0	0
Meta-Protein 779	BLAST_FLA_BACHD Flagellin OS=Bacillus halodurans (strain ATCC BAA-125 / DSM 18197 / FERM 7344 / JCM 9153 / C-125) GN=hag PE=1 SV=1_Q05203	Bacterial flagellum;Complete proteome;Direct protein sequencing;Reference proteome;Secreted;	;;;	;	;;K02406;;	;K02406;	EMPTY	EMPTY	EMPTY	Bacteria	Bacteria	unknown	Bacteria	Bacteria	Bacteria	Bacteria	Bacteria	Bacteria	15	4	3	2	2	0	1	3	0	0	0	0	0	0	0	0	0	0	0	0	0	0	0	0	0	0	0	0	0	0	0
Meta-Protein 3313	Metagenome unknown		;;		;;					Uncategorized	Uncategorized	unknown	Uncategorized	Uncategorized	Uncategorized	Uncategorized	Uncategorized	Uncategorized	6	0	1	1	1	0	0	1	1	1	0	0	0	0	0	0	0	0	0	0	0	0	0	0	0	0	0	0	0	0	0
Meta-Protein 2157	Metagenome Unknown		;;		;;					Uncategorized	Uncategorized	unknown	Uncategorized	Uncategorized	Uncategorized	Uncategorized	Uncategorized	Uncategorized	2	0	0	0	0	0	0	0	0	0	0	0	0	0	0	0	0	0	0	0	0	0	2	0	0	0	0	0	0	0	0
Meta-Protein 1263	BLAST_MNME_MOOTA tRNA modification GTPase MnmE OS=Moorella thermoacetica (strain ATCC 39073 / JCM 9320) GN=mnmE PE=3 SV=1_Q2RFI8	Complete proteome;Cytoplasm;GTP-binding;Hydrolase;Magnesium;Metal-binding;Nucleotide-binding;Potassium;Reference proteome;tRNA processing;	;3.6.-.-;;	3.6.-.-;	;K03650;;	K03650;	UniRef50_A5UY19	UniRef90_Q2RFI8	UniRef100_Q2RFI8	Bacteria	Moorella thermoacetica ATCC 39073	unknown	Clostridia	Thermoanaerobacterales	Thermoanaerobacteraceae	Moorella	Moorella thermoacetica	Moorella thermoacetica ATCC 39073	1	0	0	0	0	0	0	0	0	0	1	0	0	0	0	0	0	0	0	0	0	0	0	0	0	0	0	0	0	0	0
Meta-Protein 3918	BLAST_EUTL_SALTY Ethanolamine utilization protein EutL OS=Salmonella typhimurium (strain LT2 / SGSC1412 / ATCC 700720) GN=eutL PE=3 SV=1_P0A1C9	Complete proteome;Reference proteome;	;;;	;	;K04026;;	K04026;	UniRef50_P76541	UniRef90_P76541	UniRef100_P0A1D0	Bacteria	Salmonella enterica subsp. enterica	unknown	Gammaproteobacteria	Enterobacteriales	Enterobacteriaceae	Salmonella	Salmonella enterica	Salmonella enterica subsp. enterica	1	0	0	0	0	0	1	0	0	0	0	0	0	0	0	0	0	0	0	0	0	0	0	0	0	0	0	0	0	0	0
Meta-Protein 4264	BLAST_CH10_CLOTH 10 kDa chaperonin OS=Clostridium thermocellum (strain ATCC 27405 / DSM 1237 / NBRC 103400 / NCIMB 10682 / NRRL B-4536 / VPI 7372) GN=groS PE=1 SV=1_P48223	Chaperone;Complete proteome;Cytoplasm;Direct protein sequencing;Reference proteome;	;;;	;	;K04078;;	K04078;	UniRef50_Q05971	UniRef90_P48223	UniRef100_P48223	Bacteria	Clostridium thermocellum ATCC 27405	unknown	Clostridia	Clostridiales	Clostridiaceae	Clostridium	Clostridium thermocellum	Clostridium thermocellum ATCC 27405	1	0	0	0	0	0	0	0	0	0	0	1	0	0	0	0	0	0	0	0	0	0	0	0	0	0	0	0	0	0	0
Meta-Protein 2419	BLAST_FKBA_AERHY FKBP-type peptidyl-prolyl cis-trans isomerase FkpA OS=Aeromonas hydrophila GN=fkpA PE=3 SV=1_O08437	3D-structure;Cell outer membrane;Complete proteome;Direct protein sequencing;Endoplasmic reticulum;Isomerase;Membrane;Periplasm;Reference proteome;Rotamase;Secreted;Signal;Virulence;	;5.2.1.8;;	5.2.1.8;	;;K03773;K09569;;	;K03773;K09569;	UniRef50_P51752	UniRef90_P51752	UniRef100_P51752	cellular organisms	cellular organisms	unknown	cellular organisms	cellular organisms	cellular organisms	cellular organisms	cellular organisms	cellular organisms	3	0	0	0	0	0	0	0	0	0	0	0	0	0	0	0	0	0	0	0	0	0	0	0	0	1	0	0	0	0	0
Meta-Protein 4199	O22R_FRG3G Putative helicase 022R OS=Frog virus 3 (isolate Goorha) GN=FV3-022R PE=4 SV=1	ATP-binding;Complete proteome;Hydrolase;Nucleotide-binding;Reference proteome;	;3.6.4.-;;	3.6.4.-;	;;;	;	UniRef50_Q6GZV3	UniRef90_Q6GZV3	UniRef100_Q6GZV3	Viruses	Frog virus 3 (isolate Goorha)	unknown	Frog virus 3 (isolate Goorha)	Frog virus 3 (isolate Goorha)	Iridoviridae	Ranavirus	Frog virus 3	Frog virus 3 (isolate Goorha)	3	0	0	0	0	0	0	0	0	0	2	1	0	0	0	0	0	0	0	0	0	0	0	0	0	0	0	0	0	0	0
Meta-Protein 2552	BLAST_ALKD_PSEAE 2-dehydro-3-deoxy-phosphogluconate aldolase OS=Pseudomonas aeruginosa (strain ATCC 15692 / DSM 22644 / CIP 104116 / JCM 14847 / LMG 12228 / 1C / PRS 101 / PAO1) GN=eda PE=3 SV=2_O68283	3D-structure;Complete proteome;Lyase;Reference proteome;Schiff base;	;4.1.2.14;4.1.2.21;;	4.1.2.14;4.1.2.21;	;K01625;K01631;;	K01625;K01631;	UniRef50_O68283	UniRef90_O68283	UniRef100_O68283	Bacteria	Gammaproteobacteria	unknown	Gammaproteobacteria	Gammaproteobacteria	Gammaproteobacteria	Gammaproteobacteria	Gammaproteobacteria	Gammaproteobacteria	1	0	0	0	0	0	0	0	0	0	0	0	0	0	0	0	0	0	0	0	0	0	0	0	0	0	0	0	0	0	0
Meta-Protein 3511	BLAST_GALE_BACSU UDP-glucose 4-epimerase OS=Bacillus subtilis (strain 168) GN=galE PE=3 SV=1_P55180	Carbohydrate metabolism;Complete proteome;Galactose metabolism;Isomerase;NAD;Reference proteome;	;5.1.3.2;;	5.1.3.2;	;K01784;;	K01784;	UniRef50_P55180	UniRef90_P55180	UniRef100_P55180	Bacteria	Bacillus subtilis subsp. subtilis str. 168	unknown	Bacilli	Bacillales	Bacillaceae	Bacillus	Bacillus subtilis subsp. subtilis str. 168	Bacillus subtilis subsp. subtilis	1	0	0	1	0	0	0	0	0	0	0	0	0	0	0	0	0	0	0	0	0	0	0	0	0	0	0	0	0	0	0
Meta-Protein 1358	BLAST_ARAD_BACHD L-ribulose-5-phosphate 4-epimerase OS=Bacillus halodurans (strain ATCC BAA-125 / DSM 18197 / FERM 7344 / JCM 9153 / C-125) GN=araD PE=3 SV=1_Q9KBQ4	Arabinose catabolism;Carbohydrate metabolism;Complete proteome;Isomerase;Metal-binding;Reference proteome;Zinc;	;5.1.3.4;;	5.1.3.4;	;K01786;K03077;;	K01786;K03077;	UniRef50_P08203	UniRef90_Q9KBQ4	UniRef100_Q9KBQ4	Bacteria	Bacteria	unknown	Bacteria	Bacteria	Bacteria	Bacteria	Bacteria	Bacteria	8	0	0	0	0	0	0	0	0	0	0	0	0	0	0	0	0	0	0	4	1	0	0	0	2	0	0	0	1	0	0
Meta-Protein 846	Metagenome unknown		;;		;;					Uncategorized	Uncategorized	unknown	Uncategorized	Uncategorized	Uncategorized	Uncategorized	Uncategorized	Uncategorized	1	0	1	0	0	0	0	0	0	0	0	0	0	0	0	0	0	0	0	0	0	0	0	0	0	0	0	0	0	0	0
Meta-Protein 3312	BLAST_EFTU_MYCAP Elongation factor Tu OS=Mycoplasma agalactiae (strain PG2) GN=tuf PE=3 SV=1_A5IYA9	Complete proteome;Cytoplasm;Elongation factor;GTP-binding;Nucleotide-binding;Protein biosynthesis;Reference proteome;	;;;	;	;K02358;;	K02358;	UniRef50_P33166	UniRef90_A5IYA9	UniRef100_A5IYA9	Bacteria	Mycoplasma agalactiae PG2	unknown	Mollicutes	Mycoplasmatales	Mycoplasmataceae	Mycoplasma	Mycoplasma agalactiae	Mycoplasma agalactiae PG2	2	0	1	1	0	0	0	0	0	0	0	0	0	0	0	0	0	0	0	0	0	0	0	0	0	0	0	0	0	0	0
Meta-Protein 869	ILVC_PSEU5 Ketol-acid reductoisomerase (NADP(+)) OS=Pseudomonas stutzeri (strain A1501) GN=ilvC PE=3 SV=1	Amino-acid biosynthesis;Branched-chain amino acid biosynthesis;Complete proteome;Magnesium;Metal-binding;NADP;Nucleotide-binding;Oxidoreductase;Reference proteome;	;1.1.1.86;;	1.1.1.86;	;K00053;;	K00053;	UniRef50_D0WGK0	UniRef90_Q888N4	UniRef100_A4VPI6	Bacteria	Pseudomonas stutzeri A1501	unknown	Gammaproteobacteria	Pseudomonadales	Pseudomonadaceae	Pseudomonas	Pseudomonas stutzeri	Pseudomonas stutzeri A1501	1	0	0	1	0	0	0	0	0	0	0	0	0	0	0	0	0	0	0	0	0	0	0	0	0	0	0	0	0	0	0
Meta-Protein 4238	BLAST_YESW_BACSU Rhamnogalacturonan endolyase YesW OS=Bacillus subtilis (strain 168) GN=yesW PE=1 SV=1_O31526	3D-structure;Calcium;Cell wall biogenesis/degradation;Complete proteome;Direct protein sequencing;Lyase;Metal-binding;Reference proteome;Secreted;Signal;	;4.2.2.23;;	4.2.2.23;	;K18197;;	K18197;	UniRef50_O31526	UniRef90_O31526	UniRef100_O31526	Bacteria	Bacillus subtilis subsp. subtilis str. 168	unknown	Bacilli	Bacillales	Bacillaceae	Bacillus	Bacillus subtilis subsp. subtilis str. 168	Bacillus subtilis subsp. subtilis	1	0	0	0	0	0	0	0	0	0	1	0	0	0	0	0	0	0	0	0	0	0	0	0	0	0	0	0	0	0	0
Meta-Protein 3558	Metagenome unknown		;;		;;					Uncategorized	Uncategorized	unknown	Uncategorized	Uncategorized	Uncategorized	Uncategorized	Uncategorized	Uncategorized	7	0	0	0	2	0	1	1	1	2	0	0	0	0	0	0	0	0	0	0	0	0	0	0	0	0	0	0	0	0	0
Meta-Protein 535	BLAST_RL4_PELTS 50S ribosomal protein L4 OS=Pelotomaculum thermopropionicum (strain DSM 13744 / JCM 10971 / SI) GN=rplD PE=3 SV=1_A5D5J1	Complete proteome;RNA-binding;Reference proteome;Ribonucleoprotein;Ribosomal protein;rRNA-binding;	;;;	;	;K02926;;	K02926;	UniRef50_A9NED4	UniRef90_P61067	UniRef100_P61067	Bacteria	Bacteria	unknown	Bacteria	Bacteria	Bacteria	Bacteria	Bacteria	Bacteria	14	2	1	1	0	0	0	0	0	1	2	1	2	0	0	0	1	1	2	0	0	0	0	0	0	0	0	0	0	0	0
Meta-Protein 2010	BLAST_PTAS_CLOAB Phosphate acetyltransferase OS=Clostridium acetobutylicum (strain ATCC 824 / DSM 792 / JCM 1419 / LMG 5710 / VKM B-1787) GN=pta PE=3 SV=2_P71103	Acyltransferase;Complete proteome;Cytoplasm;Reference proteome;Transferase;	;2.3.1.8;;	2.3.1.8;	;K00625;;	K00625;	UniRef50_P71103	UniRef90_P71103	UniRef100_P71103	Bacteria	Clostridia	unknown	Clostridia	Clostridia	Clostridia	Clostridia	Clostridia	Clostridia	18	0	0	0	0	0	0	0	0	0	0	0	0	0	0	0	0	0	0	0	0	3	8	4	1	0	0	0	0	0	0
Meta-Protein 2771	Metagenome unknown		;;		;;					Uncategorized	Uncategorized	unknown	Uncategorized	Uncategorized	Uncategorized	Uncategorized	Uncategorized	Uncategorized	79	8	8	8	8	7	5	7	8	6	4	3	3	0	0	1	1	1	1	0	0	0	0	0	0	0	0	0	0	0	0
Meta-Protein 3757	BLAST_RF2_BACSU Peptide chain release factor 2 OS=Bacillus subtilis (strain 168) GN=prfB PE=3 SV=2_P28367	Complete proteome;Cytoplasm;Methylation;Protein biosynthesis;Reference proteome;Ribosomal frameshifting;	;;;	;	;K02836;;	K02836;	UniRef50_P28367	EMPTY	EMPTY	Bacteria	Bacilli	unknown	Bacilli	Bacilli	Bacilli	Bacilli	Bacilli	Bacilli	1	0	0	0	1	0	0	0	0	0	0	0	0	0	0	0	0	0	0	0	0	0	0	0	0	0	0	0	0	0	0
Meta-Protein 1662	BLAST_AK1BA_HUMAN Aldo-keto reductase family 1 member B10 OS=Homo sapiens GN=AKR1B10 PE=1 SV=2_O60218	3D-structure;Acetylation;Complete proteome;Lysosome;NADP;Oxidoreductase;Polymorphism;Reference proteome;Secreted;	;1.1.1.-;;	1.1.1.-;	;K00011;;	K00011;	UniRef50_O60218	UniRef90_O60218	UniRef100_O60218	Eukaryota	Metazoa	unknown	Mammalia	Primates	Hominidae	Homo	Homo sapiens	Homo sapiens	1	0	0	0	0	0	0	0	0	0	0	0	0	0	0	0	0	0	0	1	0	0	0	0	0	0	0	0	0	0	0
Meta-Protein 4885	PYRG_CHLPN CTP synthase OS=Chlamydia pneumoniae GN=pyrG PE=3 SV=2	ATP-binding;Complete proteome;Glutamine amidotransferase;Ligase;Magnesium;Metal-binding;Nucleotide-binding;Pyrimidine biosynthesis;Reference proteome;	;6.3.4.2;;	6.3.4.2;	;K01937;;	K01937;	UniRef50_Q9Z8U8	UniRef90_Q9Z8U8	UniRef100_Q9Z8U8	Bacteria	Chlamydia pneumoniae	unknown	Chlamydiia	Chlamydiales	Chlamydiaceae	Chlamydia	Chlamydia pneumoniae	Chlamydia pneumoniae	1	0	0	0	0	0	0	0	0	0	0	0	0	0	0	0	0	0	0	0	0	0	0	0	0	0	1	0	0	0	0
Meta-Protein 1366	BLAST_SERC_BACTN Phosphoserine aminotransferase OS=Bacteroides thetaiotaomicron (strain ATCC 29148 / DSM 2079 / NCTC 10582 / E50 / VPI-5482) GN=serC PE=3 SV=1_Q8A8L4	Amino-acid biosynthesis;Aminotransferase;Complete proteome;Cytoplasm;Pyridoxal phosphate;Pyridoxine biosynthesis;Reference proteome;Serine biosynthesis;Transferase;	;2.6.1.52;;	2.6.1.52;	;K00831;;	K00831;	UniRef50_Q8A8L4	UniRef90_Q8A8L4	UniRef100_A6L5A6	Bacteria	Bacteroidales	unknown	Bacteroidia	Bacteroidales	Bacteroidales	Bacteroidales	Bacteroidales	Bacteroidales	77	0	0	0	0	0	0	0	0	0	0	0	0	0	0	0	0	0	0	7	4	2	7	5	5	15	5	11	0	0	2
Meta-Protein 2718	BLAST_EXBB_HELPJ Biopolymer transport protein ExbB OS=Helicobacter pylori (strain J99 / ATCC 700824) GN=exbB PE=3 SV=1_Q9ZJP6	Cell inner membrane;Cell membrane;Complete proteome;Membrane;Protein transport;Reference proteome;Transmembrane;Transmembrane helix;Transport;	;;;	;	;K03561;;	K03561;	UniRef50_O25897	UniRef90_O25897	EMPTY	Bacteria	Helicobacter pylori	unknown	Epsilonproteobacteria	Campylobacterales	Helicobacteraceae	Helicobacter	Helicobacter pylori	Helicobacter pylori	1	1	0	0	0	0	0	0	0	0	0	0	0	0	0	0	0	0	0	0	0	0	0	0	0	0	0	0	0	0	0
Meta-Protein 4087	Metagenome unknown		;;		;;					Uncategorized	Uncategorized	unknown	Uncategorized	Uncategorized	Uncategorized	Uncategorized	Uncategorized	Uncategorized	1	0	0	0	0	0	0	0	1	0	0	0	0	0	0	0	0	0	0	0	0	0	0	0	0	0	0	0	0	0	0
Meta-Protein 3925	Metagenome unknown		;;		;;					Uncategorized	Uncategorized	unknown	Uncategorized	Uncategorized	Uncategorized	Uncategorized	Uncategorized	Uncategorized	2	0	0	0	0	0	1	0	0	0	1	0	0	0	0	0	0	0	0	0	0	0	0	0	0	0	0	0	0	0	0
Meta-Protein 485	BLAST_DNAK_MEGEL Chaperone protein DnaK (Fragment) OS=Megasphaera elsdenii GN=dnaK PE=3 SV=1_Q9ZIV1	3D-structure;ATP-binding;Acetylation;Allergen;Alternative splicing;Cell inner membrane;Cell membrane;Cell wall;Chaperone;Chloroplast;Coiled coil;Complete proteome;Cyanelle;Cytoplasm;Cytoskeleton;DNA replication;Developmental protein;Differentiation;Direct protein sequencing;Endoplasmic reticulum;Glycoprotein;Host-virus interaction;Hydrolase;Isopeptide bond;Kinetoplast;Membrane;Methylation;Mitocho…	;;3.6.4.10;;	;3.6.4.10;	;;K03283;K04043;K04044;K09490;;	;K03283;K04043;K04044;K09490;	UniRef50_Q8ZCS5	UniRef90_Q7NZ33	UniRef100_Q7NZ33	cellular organisms	cellular organisms	unknown	cellular organisms	cellular organisms	cellular organisms	cellular organisms	cellular organisms	cellular organisms	300	6	5	3	4	1	2	2	0	1	3	2	2	1	1	0	1	0	0	17	6	4	8	5	11	40	40	33	8	7	4
Meta-Protein 1451	BLAST_PGK_PORGI Phosphoglycerate kinase OS=Porphyromonas gingivalis (strain ATCC BAA-308 / W83) GN=pgk PE=3 SV=1_Q7MU77	ATP-binding;Complete proteome;Cytoplasm;Glycolysis;Kinase;Nucleotide-binding;Reference proteome;Transferase;	;2.7.2.3;;	2.7.2.3;	;K00927;;	K00927;	UniRef50_Q8A753	EMPTY	EMPTY	Bacteria	Bacteroidales	unknown	Bacteroidia	Bacteroidales	Bacteroidales	Bacteroidales	Bacteroidales	Bacteroidales	103	0	0	0	0	0	0	0	0	0	0	0	0	0	0	0	0	0	0	10	7	15	22	14	5	0	6	1	1	3	6
Meta-Protein 3009	BLAST_DCMS_HYDPS Carbon monoxide dehydrogenase small chain OS=Hydrogenophaga pseudoflava GN=cutS PE=1 SV=2_P19915	2Fe-2S;3D-structure;Direct protein sequencing;Iron;Iron-sulfur;Metal-binding;Oxidoreductase;	;1.2.5.3;;	1.2.5.3;	;;;	;	UniRef50_P19915	UniRef90_P19915	UniRef100_P19915	Bacteria	Hydrogenophaga pseudoflava	unknown	Betaproteobacteria	Burkholderiales	Comamonadaceae	Hydrogenophaga	Hydrogenophaga pseudoflava	Hydrogenophaga pseudoflava	22	3	3	3	4	3	1	2	1	2	0	0	0	0	0	0	0	0	0	0	0	0	0	0	0	0	0	0	0	0	0
Meta-Protein 4231	BLAST_CGGR_BACSU Central glycolytic genes regulator OS=Bacillus subtilis (strain 168) GN=cggR PE=1 SV=1_O32253	3D-structure;Complete proteome;DNA-binding;Reference proteome;Repressor;Transcription;Transcription regulation;	;;;	;	;K05311;;	K05311;	UniRef50_O32253	UniRef90_O32253	UniRef100_O32253	Bacteria	Bacillus subtilis subsp. subtilis str. 168	unknown	Bacilli	Bacillales	Bacillaceae	Bacillus	Bacillus subtilis subsp. subtilis str. 168	Bacillus subtilis subsp. subtilis	1	0	0	0	0	0	0	0	0	0	1	0	0	0	0	0	0	0	0	0	0	0	0	0	0	0	0	0	0	0	0
Meta-Protein 5034	AAPJ_RHIL3 General L-amino acid-binding periplasmic protein AapJ OS=Rhizobium leguminosarum bv. viciae (strain 3841) GN=aapJ PE=3 SV=1	Amino-acid transport;Complete proteome;Periplasm;Signal;Transport;	;;;	;	;K09969;;	K09969;	UniRef50_Q52812	UniRef90_Q52812	UniRef100_Q52812	Bacteria	Rhizobium leguminosarum bv. viciae 3841	unknown	Alphaproteobacteria	Rhizobiales	Rhizobiaceae	Rhizobium	Rhizobium leguminosarum bv. viciae 3841	Rhizobium leguminosarum bv. viciae	5	0	0	0	0	0	0	0	0	0	0	0	0	0	0	0	0	0	0	0	0	0	0	0	0	0	0	0	0	0	0
Meta-Protein 3667	BLAST_ELBB_SHIFL Glyoxalase ElbB OS=Shigella flexneri GN=elbB PE=3 SV=1_P0ABU6	3D-structure;Complete proteome;Direct protein sequencing;Lyase;Reference proteome;	;4.2.1.-;;	4.2.1.-;	;;;	;	UniRef50_P0ABU5	UniRef90_P0ABU5	UniRef100_P0ABU5	Bacteria	Enterobacteriaceae	unknown	Gammaproteobacteria	Enterobacteriales	Enterobacteriaceae	Enterobacteriaceae	Enterobacteriaceae	Enterobacteriaceae	5	0	0	0	1	0	3	0	0	1	0	0	0	0	0	0	0	0	0	0	0	0	0	0	0	0	0	0	0	0	0
Meta-Protein 2791	BLAST_GCTA_ACIFV Glutaconate CoA-transferase subunit A OS=Acidaminococcus fermentans (strain ATCC 25085 / DSM 20731 / VR4) GN=gctA PE=1 SV=3_Q59111	3D-structure;Complete proteome;Cytoplasm;Direct protein sequencing;Reference proteome;Transferase;	;2.8.3.12;;	2.8.3.12;	;K01039;;	K01039;	UniRef50_Q59111	UniRef90_Q59111	UniRef100_Q59111	Bacteria	Acidaminococcus fermentans DSM 20731	unknown	Negativicutes	Selenomonadales	Acidaminococcaceae	Acidaminococcus	Acidaminococcus fermentans	Acidaminococcus fermentans DSM 20731	36	4	3	4	3	2	3	6	6	5	0	0	0	0	0	0	0	0	0	0	0	0	0	0	0	0	0	0	0	0	0
Meta-Protein 1608	BLAST_RS15_BACV8 30S ribosomal protein S15 OS=Bacteroides vulgatus (strain ATCC 8482 / DSM 1447 / JCM 5826 / NBRC 14291 / NCTC 11154) GN=rpsO PE=3 SV=1_A6KYS7	Complete proteome;RNA-binding;Reference proteome;Ribonucleoprotein;Ribosomal protein;rRNA-binding;	;;;	;	;K02956;;	K02956;	UniRef50_Q3AQL1	UniRef90_A6KYS7	UniRef100_A6KYS7	Bacteria	Bacteroides vulgatus ATCC 8482	unknown	Bacteroidia	Bacteroidales	Bacteroidaceae	Bacteroides	Bacteroides vulgatus	Bacteroides vulgatus ATCC 8482	7	0	0	0	0	0	0	0	0	0	0	0	0	0	0	0	0	0	0	3	0	0	0	0	0	0	0	0	2	2	0
Meta-Protein 1592	Metagenome Unknown		;;		;;					Uncategorized	Uncategorized	unknown	Uncategorized	Uncategorized	Uncategorized	Uncategorized	Uncategorized	Uncategorized	74	0	0	0	0	0	0	0	0	0	0	0	0	0	0	0	0	0	0	3	0	10	17	18	0	0	0	0	0	0	2
Meta-Protein 3551	BLAST_ACKA_SYNWW Acetate kinase OS=Syntrophomonas wolfei subsp. wolfei (strain DSM 2245B / Goettingen) GN=ackA PE=3 SV=1_Q0AYW5	ATP-binding;Complete proteome;Cytoplasm;Kinase;Magnesium;Metal-binding;Nucleotide-binding;Reference proteome;Transferase;	;2.7.2.1;;	2.7.2.1;	;K00925;;	K00925;	UniRef50_Q0AYW5	UniRef90_Q0AYW5	UniRef100_Q0AYW5	Bacteria	Syntrophomonas wolfei subsp. wolfei str. Goettingen	unknown	Clostridia	Clostridiales	Syntrophomonadaceae	Syntrophomonas	Syntrophomonas wolfei subsp. wolfei str. Goettingen	Syntrophomonas wolfei subsp. wolfei	2	0	0	0	1	1	0	0	0	0	0	0	0	0	0	0	0	0	0	0	0	0	0	0	0	0	0	0	0	0	0
Meta-Protein 3966	Metagenome unknown		;;		;;					Uncategorized	Uncategorized	unknown	Uncategorized	Uncategorized	Uncategorized	Uncategorized	Uncategorized	Uncategorized	2	0	0	0	0	0	0	2	0	0	0	0	0	0	0	0	0	0	0	0	0	0	0	0	0	0	0	0	0	0	0
Meta-Protein 2623	Metagenome unknown	3D-structure;Cell outer membrane;Direct protein sequencing;Ion transport;Membrane;Porin;Pyrrolidone carboxylic acid;Signal;Transmembrane;Transmembrane beta strand;Transport;	;;;	;	;;;	;	UniRef50_P24305	UniRef90_P24305	UniRef100_P24305	Bacteria	Delftia acidovorans	unknown	Betaproteobacteria	Burkholderiales	Comamonadaceae	Delftia	Delftia acidovorans	Delftia acidovorans	11	0	0	0	0	0	0	0	0	0	0	0	0	0	0	0	0	0	0	0	0	0	0	0	0	0	0	0	0	0	0
Meta-Protein 280	BLAST_MTD_METMJ F420-dependent methylenetetrahydromethanopterin dehydrogenase OS=Methanoculleus marisnigri (strain ATCC 35101 / DSM 1498 / JR1) GN=mtd PE=3 SV=1_A3CSZ5	Complete proteome;Direct protein sequencing;Methanogenesis;One-carbon metabolism;Oxidoreductase;Reference proteome;	;1.5.98.1;;	1.5.98.1;	;K00319;;	K00319;	UniRef50_P55300	EMPTY	EMPTY	Archaea	Euryarchaeota	unknown	Euryarchaeota	Euryarchaeota	Euryarchaeota	Euryarchaeota	Euryarchaeota	Euryarchaeota	419	47	41	29	35	29	30	51	43	34	16	13	12	5	3	1	11	10	9	0	0	0	0	0	0	0	0	0	0	0	0
Meta-Protein 949	BLAST_MALE_PYRFU Maltotriose-binding protein OS=Pyrococcus furiosus (strain ATCC 43587 / DSM 3638 / JCM 8422 / Vc1) GN=malE PE=1 SV=1_P58300	3D-structure;Cell membrane;Complete proteome;Lipoprotein;Membrane;Palmitate;Periplasm;Reference proteome;Signal;Sugar transport;Transport;	;;;	;	;K10108;K15770;;	K10108;K15770;	UniRef50_P19576	UniRef90_P19576	UniRef100_P19576	cellular organisms	cellular organisms	unknown	cellular organisms	cellular organisms	cellular organisms	cellular organisms	cellular organisms	cellular organisms	68	0	0	0	15	11	8	11	5	7	0	0	0	1	0	0	3	4	3	0	0	0	0	0	0	0	0	0	0	0	0
Meta-Protein 3123	BLAST_CAPA_STAAS Capsular polysaccharide biosynthesis protein CapA OS=Staphylococcus aureus (strain MSSA476) GN=capA PE=3 SV=1_Q6G610	Capsule biogenesis/degradation;Cell membrane;Complete proteome;Exopolysaccharide synthesis;Membrane;Transmembrane;Transmembrane helix;	;;;	;	;;;	;	UniRef50_Q5HCN3	UniRef90_Q5HCN3	EMPTY	Bacteria	Staphylococcus aureus subsp. aureus	unknown	Bacilli	Bacillales	Staphylococcaceae	Staphylococcus	Staphylococcus aureus	Staphylococcus aureus subsp. aureus	9	2	2	2	0	1	0	1	0	1	0	0	0	0	0	0	0	0	0	0	0	0	0	0	0	0	0	0	0	0	0
Meta-Protein 2545	BLAST_RS11_LACP7 30S ribosomal protein S11 OS=Lachnoclostridium phytofermentans (strain ATCC 700394 / DSM 18823 / ISDg) GN=rpsK PE=3 SV=1_A9KJG8	3D-structure;Complete proteome;RNA-binding;Reference proteome;Ribonucleoprotein;Ribosomal protein;rRNA-binding;	;;;	;	;K02948;;	K02948;	UniRef50_P73298	UniRef90_A9KJG8	UniRef100_A9KJG8	Bacteria	Firmicutes	unknown	Firmicutes	Firmicutes	Firmicutes	Firmicutes	Firmicutes	Firmicutes	1	0	0	0	0	0	0	0	0	0	0	0	0	0	0	0	0	0	0	0	0	0	0	0	0	0	0	0	0	0	0
Meta-Protein 328	BLAST_YESO_BACSU Putative ABC transporter substrate-binding protein YesO OS=Bacillus subtilis (strain 168) GN=yesO PE=1 SV=2_O31518	3D-structure;Complete proteome;Reference proteome;	;;;	;	;K02027;;	K02027;	UniRef50_O31518	UniRef90_O31518	UniRef100_O31518	Bacteria	Bacillus subtilis subsp. subtilis str. 168	unknown	Bacilli	Bacillales	Bacillaceae	Bacillus	Bacillus subtilis subsp. subtilis str. 168	Bacillus subtilis subsp. subtilis	65	11	12	12	2	1	1	1	0	0	7	7	7	0	0	0	2	1	1	0	0	0	0	0	0	0	0	0	0	0	0
Meta-Protein 3713	BLAST_NUDT3_ARATH Nudix hydrolase 3 OS=Arabidopsis thaliana GN=NUDT3 PE=1 SV=1_Q8L831	Alternative splicing;Complete proteome;Hydrolase;Magnesium;Manganese;Metal-binding;Reference proteome;	;3.6.1.-;;	3.6.1.-;	;;;	;	UniRef50_Q8L831	UniRef90_Q8L831	UniRef100_Q8L831	Eukaryota	Viridiplantae	unknown	Arabidopsis thaliana	Brassicales	Brassicaceae	Arabidopsis	Arabidopsis thaliana	Arabidopsis thaliana	1	0	0	0	1	0	0	0	0	0	0	0	0	0	0	0	0	0	0	0	0	0	0	0	0	0	0	0	0	0	0
Meta-Protein 3802	BLAST_FABF_BACSU 3-oxoacyl-[acyl-carrier-protein] synthase 2 OS=Bacillus subtilis (strain 168) GN=fabF PE=1 SV=1_O34340	3D-structure;Acyltransferase;Complete proteome;Fatty acid biosynthesis;Fatty acid metabolism;Lipid biosynthesis;Lipid metabolism;Reference proteome;Transferase;	;2.3.1.179;;	2.3.1.179;	;K09458;;	K09458;	UniRef50_O34340	UniRef90_O34340	UniRef100_O34340	Bacteria	Bacillus subtilis subsp. subtilis str. 168	unknown	Bacilli	Bacillales	Bacillaceae	Bacillus	Bacillus subtilis subsp. subtilis str. 168	Bacillus subtilis subsp. subtilis	2	0	0	0	0	1	1	0	0	0	0	0	0	0	0	0	0	0	0	0	0	0	0	0	0	0	0	0	0	0	0
Meta-Protein 1648	BLAST_MUC13_HUMAN Mucin-13 OS=Homo sapiens GN=MUC13 PE=1 SV=3_Q9H3R2	Cell membrane;Complete proteome;Disulfide bond;EGF-like domain;Glycoprotein;Membrane;Polymorphism;Reference proteome;Repeat;Secreted;Signal;Transmembrane;Transmembrane helix;	;;;	;	;K17298;;	K17298;	UniRef50_Q9H3R2	UniRef90_Q9H3R2	UniRef100_Q9H3R2	Eukaryota	Metazoa	unknown	Mammalia	Primates	Hominidae	Homo	Homo sapiens	Homo sapiens	20	0	0	0	0	0	0	0	0	0	0	0	0	0	0	0	0	0	0	1	0	0	0	0	0	3	3	4	0	0	0
Meta-Protein 3143	BLAST_SECD_LEPBD Protein translocase subunit SecD OS=Leptotrichia buccalis (strain ATCC 14201 / DSM 1135 / JCM 12969 / NCTC 10249 / C-1013-b) GN=secD PE=3 SV=1_C7NC37	Cell inner membrane;Cell membrane;Complete proteome;Membrane;Protein transport;Reference proteome;Translocation;Transmembrane;Transmembrane helix;Transport;	;;;	;	;K03072;;	K03072;	UniRef50_D1AMK9	UniRef90_C7NC37	UniRef100_C7NC37	Bacteria	Leptotrichia buccalis C-1013-b	unknown	Fusobacteriia	Fusobacteriales	Leptotrichiaceae	Leptotrichia	Leptotrichia buccalis	Leptotrichia buccalis C-1013-b	2	1	0	1	0	0	0	0	0	0	0	0	0	0	0	0	0	0	0	0	0	0	0	0	0	0	0	0	0	0	0
Meta-Protein 1237	BLAST_PPDA_CLOPE Prepilin peptidase-dependent protein A OS=Clostridium perfringens (strain 13 / Type A) GN=ppdA PE=3 SV=2_P33555	Complete proteome;Methylation;Reference proteome;	;;;	;	;K02650;;	K02650;	UniRef50_P33555	UniRef90_P33555	UniRef100_P33555	Bacteria	Clostridium perfringens str. 13	unknown	Clostridia	Clostridiales	Clostridiaceae	Clostridium	Clostridium perfringens	Clostridium perfringens str. 13	2	0	0	0	0	0	0	0	0	0	1	1	0	0	0	0	0	0	0	0	0	0	0	0	0	0	0	0	0	0	0
Meta-Protein 4015	BLAST_CBPA_THENN Cellobiose phosphorylase OS=Thermotoga neapolitana (strain ATCC 49049 / DSM 4359 / NS-E) GN=cbpA PE=1 SV=1_B9K7M6	Carbohydrate metabolism;Cellulose degradation;Complete proteome;Glycosyltransferase;Polysaccharide degradation;Transferase;	;2.4.1.20;;	2.4.1.20;	;K00702;;	K00702;	UniRef50_B9K7M6	UniRef90_B9K7M6	UniRef100_B9K7M6	Bacteria	Thermotoga neapolitana DSM 4359	unknown	Thermotogae	Thermotogales	Thermotogaceae	Thermotoga	Thermotoga neapolitana	Thermotoga neapolitana DSM 4359	1	0	0	0	0	0	0	1	0	0	0	0	0	0	0	0	0	0	0	0	0	0	0	0	0	0	0	0	0	0	0
Meta-Protein 5152	Metagenome unknown		;;		;;					Uncategorized	Uncategorized	unknown	Uncategorized	Uncategorized	Uncategorized	Uncategorized	Uncategorized	Uncategorized	1	0	0	0	0	0	0	0	0	0	0	0	0	0	0	0	0	0	0	0	0	0	0	0	0	0	0	0	0	0	0
Meta-Protein 321	BLAST_MCRB_METTM Methyl-coenzyme M reductase I subunit beta OS=Methanothermobacter marburgensis (strain ATCC BAA-927 / DSM 2133 / JCM 14651 / NBRC 100331 / OCM 82 / Marburg) GN=mcrB PE=1 SV=3_P11560	3D-structure;Complete proteome;Direct protein sequencing;Methanogenesis;Reference proteome;Transferase;	;2.8.4.1;;	2.8.4.1;	;K00401;;	K00401;	UniRef50_P11560	UniRef90_P11560	EMPTY	Archaea	Methanothermobacter	unknown	Methanobacteria	Methanobacteriales	Methanobacteriaceae	Methanothermobacter	Methanothermobacter	Methanothermobacter	41	6	5	4	0	0	0	0	0	0	11	7	8	0	0	0	0	0	0	0	0	0	0	0	0	0	0	0	0	0	0
Meta-Protein 5199	BLAST_CSPA_LISMO Cold shock-like protein CspLA OS=Listeria monocytogenes serovar 1/2a (strain ATCC BAA-679 / EGD-e) GN=cspLA PE=1 SV=1_P0A355	3D-structure;Activator;Complete proteome;Cytoplasm;DNA-binding;Reference proteome;Stress response;Transcription;Transcription regulation;	;;;	;	;K03704;;	K03704;	UniRef50_P0A356	UniRef90_P0A356	UniRef100_P0A356	Bacteria	Listeria	unknown	Bacilli	Bacillales	Listeriaceae	Listeria	Listeria	Listeria	2	0	0	0	0	0	0	0	0	0	0	0	0	0	0	0	0	0	0	0	0	0	0	0	0	0	0	0	0	0	0
Meta-Protein 4917	Metagenome Unknown		;;		;;					Uncategorized	Uncategorized	unknown	Uncategorized	Uncategorized	Uncategorized	Uncategorized	Uncategorized	Uncategorized	2	0	0	0	0	0	0	0	0	0	0	0	0	0	0	0	0	0	0	0	0	0	0	0	0	0	1	0	0	0	0
Meta-Protein 4990	BLAST_WBJE_PSEAI Probable glycosyltransferase WbjE OS=Pseudomonas aeruginosa GN=wbjE PE=3 SV=2_Q8KIU8	Glycosyltransferase;Lipopolysaccharide biosynthesis;Transferase;	;2.4.-.-;;	2.4.-.-;	;;;	;	UniRef50_Q8KIU8	UniRef90_Q8KIU8	UniRef100_Q8KIU8	Bacteria	Pseudomonas aeruginosa	unknown	Gammaproteobacteria	Pseudomonadales	Pseudomonadaceae	Pseudomonas	Pseudomonas aeruginosa	Pseudomonas aeruginosa	1	0	0	0	0	0	0	0	0	0	0	0	0	0	0	0	0	0	0	0	0	0	0	0	0	0	0	0	0	0	0
Meta-Protein 2171	LPP_PECAS Major outer membrane lipoprotein OS=Pectobacterium atrosepticum (strain SCRI 1043 / ATCC BAA-672) GN=lpp PE=3 SV=1	Cell outer membrane;Complete proteome;Lipoprotein;Membrane;Palmitate;Peptidoglycan-anchor;Reference proteome;Repeat;Signal;	;;;	;	;;K06078;;	;K06078;	UniRef50_Q8ZDZ6	UniRef90_P69778	EMPTY	Bacteria	Enterobacteriaceae	unknown	Gammaproteobacteria	Enterobacteriales	Enterobacteriaceae	Enterobacteriaceae	Enterobacteriaceae	Enterobacteriaceae	1	0	0	0	0	0	0	0	0	0	0	0	0	0	0	0	0	0	0	0	0	0	1	0	0	0	0	0	0	0	0
Meta-Protein 4242	BLAST_NIFJ_ENTAG Pyruvate-flavodoxin oxidoreductase OS=Enterobacter agglomerans GN=nifJ PE=3 SV=3_P19543	4Fe-4S;Electron transport;Iron;Iron-sulfur;Metal-binding;Nitrogen fixation;Oxidoreductase;Plasmid;Repeat;Transport;	;1.2.7.-;;	1.2.7.-;	;;;	;	UniRef50_P19543	UniRef90_P19543	UniRef100_P19543	Bacteria	Pantoea agglomerans	unknown	Gammaproteobacteria	Enterobacteriales	Enterobacteriaceae	Pantoea	Pantoea agglomerans	Pantoea agglomerans	1	0	0	0	0	0	0	0	0	0	1	0	0	0	0	0	0	0	0	0	0	0	0	0	0	0	0	0	0	0	0
Meta-Protein 607	Metagenome unknown		;;		;;					Uncategorized	Uncategorized	unknown	Uncategorized	Uncategorized	Uncategorized	Uncategorized	Uncategorized	Uncategorized	15	4	6	4	0	1	0	0	0	0	0	0	0	0	0	0	0	0	0	0	0	0	0	0	0	0	0	0	0	0	0
Meta-Protein 3357	BLAST_NAGB_PARD8 Glucosamine-6-phosphate deaminase OS=Parabacteroides distasonis (strain ATCC 8503 / DSM 20701 / CIP 104284 / JCM 5825 / NCTC 11152) GN=nagB PE=3 SV=1_A6LHV2	Allosteric enzyme;Carbohydrate metabolism;Complete proteome;Hydrolase;Reference proteome;	;3.5.99.6;;	3.5.99.6;	;K02564;;	K02564;	UniRef50_Q8TDQ7-5	UniRef90_A6LHV2	UniRef100_A6LHV2	Bacteria	Parabacteroides distasonis ATCC 8503	unknown	Bacteroidia	Bacteroidales	Porphyromonadaceae	Parabacteroides	Parabacteroides distasonis	Parabacteroides distasonis ATCC 8503	1	0	1	0	0	0	0	0	0	0	0	0	0	0	0	0	0	0	0	0	0	0	0	0	0	0	0	0	0	0	0
Meta-Protein 4698	BLAST_SECA_BACTN Protein translocase subunit SecA OS=Bacteroides thetaiotaomicron (strain ATCC 29148 / DSM 2079 / NCTC 10582 / E50 / VPI-5482) GN=secA PE=3 SV=1_Q89ZL5	ATP-binding;Cell inner membrane;Cell membrane;Complete proteome;Cytoplasm;Membrane;Metal-binding;Nucleotide-binding;Protein transport;Reference proteome;Translocation;Transport;Zinc;	;;;	;	;K03070;;	K03070;	UniRef50_Q89ZL5	UniRef90_Q89ZL5	UniRef100_Q89ZL5	Bacteria	Bacteroides thetaiotaomicron VPI-5482	unknown	Bacteroidia	Bacteroidales	Bacteroidaceae	Bacteroides	Bacteroides thetaiotaomicron	Bacteroides thetaiotaomicron VPI-5482	1	0	0	0	0	0	0	0	0	0	0	0	0	0	0	0	0	0	0	0	0	0	1	0	0	0	0	0	0	0	0
Meta-Protein 2234	BLAST_ANX11_HUMAN Annexin A11 OS=Homo sapiens GN=ANXA11 PE=1 SV=1_P50995	Acetylation;Alternative splicing;Annexin;Calcium;Calcium/phospholipid-binding;Cell cycle;Cell division;Complete proteome;Cytoplasm;Cytoskeleton;Direct protein sequencing;Nucleus;Polymorphism;Reference proteome;Repeat;	;;;	;	;K17095;;	K17095;	UniRef50_P50995	UniRef90_P50995	UniRef100_P50995	Eukaryota	Metazoa	unknown	Mammalia	Euarchontoglires	Euarchontoglires	Euarchontoglires	Euarchontoglires	Euarchontoglires	2	0	0	0	0	0	0	0	0	0	0	0	0	0	0	0	0	0	0	0	0	0	0	0	2	0	0	0	0	0	0
Meta-Protein 3247	BLAST_RUBY2_CLOAB Rubrerythrin-2 OS=Clostridium acetobutylicum (strain ATCC 824 / DSM 792 / JCM 1419 / LMG 5710 / VKM B-1787) GN=rbr2 PE=2 SV=1_Q97ET8	Complete proteome;Electron transport;Iron;Metal-binding;NAD;Oxidoreductase;Peroxidase;Reference proteome;Transport;	;1.11.1.1;;	1.11.1.1;	;;;	;	UniRef50_Q97ET8	UniRef90_Q97ET8	UniRef100_Q97ET8	Bacteria	Clostridium acetobutylicum ATCC 824	unknown	Clostridia	Clostridiales	Clostridiaceae	Clostridium	Clostridium acetobutylicum	Clostridium acetobutylicum ATCC 824	2	1	0	1	0	0	0	0	0	0	0	0	0	0	0	0	0	0	0	0	0	0	0	0	0	0	0	0	0	0	0
Meta-Protein 963	BLAST_BGLX_DICCH Periplasmic beta-glucosidase/beta-xylosidase OS=Dickeya chrysanthemi GN=bgxA PE=3 SV=1_Q46684	Carbohydrate metabolism;Complete proteome;Direct protein sequencing;Glycoprotein;Glycosidase;Hydrolase;Lysosome;Multifunctional enzyme;Periplasm;Polysaccharide degradation;Reference proteome;Signal;Xylan degradation;	;3.2.1.21;3.2.1.37;;	3.2.1.21;3.2.1.37;	;;K05349;;	;K05349;	EMPTY	EMPTY	EMPTY	cellular organisms	cellular organisms	unknown	cellular organisms	cellular organisms	cellular organisms	cellular organisms	cellular organisms	cellular organisms	22	0	0	0	11	8	2	0	1	0	0	0	0	0	0	0	0	0	0	0	0	0	0	0	0	0	0	0	0	0	0
Meta-Protein 937	BLAST_Y1623_METJA Uncharacterized protein MJ1623 OS=Methanocaldococcus jannaschii (strain ATCC 43067 / DSM 2661 / JAL-1 / JCM 10045 / NBRC 100440) GN=MJ1623 PE=4 SV=1_Q59017	Complete proteome;Reference proteome;	;;;	;	;;;	;	UniRef50_Q59017	UniRef90_Q59017	UniRef100_Q59017	Archaea	Methanocaldococcus jannaschii DSM 2661	unknown	Methanococci	Methanococcales	Methanocaldococcaceae	Methanocaldococcus	Methanocaldococcus jannaschii	Methanocaldococcus jannaschii DSM 2661	30	0	0	0	7	2	4	3	2	1	0	0	0	4	4	1	2	0	0	0	0	0	0	0	0	0	0	0	0	0	0
Meta-Protein 1655	BLAST_IC1_HUMAN Plasma protease C1 inhibitor OS=Homo sapiens GN=SERPING1 PE=1 SV=2_P05155	3D-structure;Alternative splicing;Blood coagulation;Complement pathway;Complete proteome;Direct protein sequencing;Disease mutation;Disulfide bond;Fibrinolysis;Glycoprotein;Hemostasis;Immunity;Innate immunity;Polymorphism;Protease inhibitor;Reference proteome;Repeat;Secreted;Serine protease inhibitor;Signal;	;;;	;	;K04001;;	K04001;	UniRef50_P05155	UniRef90_P05155	UniRef100_P05155	Eukaryota	Metazoa	unknown	Mammalia	Primates	Hominidae	Homo	Homo sapiens	Homo sapiens	2	0	0	0	0	0	0	0	0	0	0	0	0	0	0	0	0	0	0	1	0	0	0	0	1	0	0	0	0	0	0
Meta-Protein 2097	FHL1_HUMAN Four and a half LIM domains protein 1 OS=Homo sapiens GN=FHL1 PE=1 SV=4	3D-structure;Acetylation;Alternative splicing;Complete proteome;Cytoplasm;Developmental protein;Differentiation;Direct protein sequencing;Disease mutation;Emery-Dreifuss muscular dystrophy;Isopeptide bond;LIM domain;Metal-binding;Nucleus;Phosphoprotein;Polymorphism;Reference proteome;Repeat;Transcription;Transcription regulation;Ubl conjugation;Zinc;Zinc-finger;	;;;	;	;;K14365;K14380;;	;K14365;K14380;	UniRef50_Q9WUH4	UniRef90_Q9WUH4	UniRef100_Q9WUH4	Eukaryota	Metazoa	unknown	Mammalia	Eutheria	Eutheria	Eutheria	Eutheria	Eutheria	8	0	0	0	0	0	0	0	0	0	0	0	0	0	0	0	0	0	0	0	0	0	2	0	0	3	0	0	0	0	0
Meta-Protein 3109	BLAST_PGCA_BACSU Phosphoglucomutase OS=Bacillus subtilis (strain 168) GN=pgcA PE=1 SV=3_P18159	Carbohydrate metabolism;Complete proteome;Glucose metabolism;Isomerase;Magnesium;Metal-binding;Phosphoprotein;Reference proteome;	;5.4.2.2;;	5.4.2.2;	;K01835;;	K01835;	UniRef50_P18159	UniRef90_P18159	UniRef100_P18159	Bacteria	Bacillus subtilis subsp. subtilis str. 168	unknown	Bacilli	Bacillales	Bacillaceae	Bacillus	Bacillus subtilis subsp. subtilis str. 168	Bacillus subtilis subsp. subtilis	5	1	2	0	0	0	0	0	0	0	0	1	1	0	0	0	0	0	0	0	0	0	0	0	0	0	0	0	0	0	0
Meta-Protein 4337	Metagenome Unknown		;;		;;					Uncategorized	Uncategorized	unknown	Uncategorized	Uncategorized	Uncategorized	Uncategorized	Uncategorized	Uncategorized	3	0	0	0	0	0	0	0	0	0	0	0	0	0	0	0	0	0	0	1	2	0	0	0	0	0	0	0	0	0	0
Meta-Protein 958	BLAST_MAO4_BACSU Probable NAD-dependent malic enzyme 4 OS=Bacillus subtilis (strain 168) GN=ytsJ PE=3 SV=1_O34962	Complete proteome;Metal-binding;NAD;Oxidoreductase;Reference proteome;	;1.1.1.38;;	1.1.1.38;	;K00027;;	K00027;	UniRef50_E1V8J1	UniRef90_O34962	UniRef100_O34962	Bacteria	Bacillus subtilis subsp. subtilis str. 168	unknown	Bacilli	Bacillales	Bacillaceae	Bacillus	Bacillus subtilis subsp. subtilis str. 168	Bacillus subtilis subsp. subtilis	7	0	0	0	2	1	0	3	0	0	1	0	0	0	0	0	0	0	0	0	0	0	0	0	0	0	0	0	0	0	0
Meta-Protein 4024	BLAST_YEBA_BACSU Uncharacterized protein YebA OS=Bacillus subtilis (strain 168) GN=yebA PE=4 SV=2_P94476	Cell membrane;Complete proteome;Membrane;Reference proteome;Transmembrane;Transmembrane helix;	;;;	;	;;;	;	UniRef50_P94476	UniRef90_P94476	UniRef100_P94476	Bacteria	Bacillus subtilis subsp. subtilis str. 168	unknown	Bacilli	Bacillales	Bacillaceae	Bacillus	Bacillus subtilis subsp. subtilis str. 168	Bacillus subtilis subsp. subtilis	1	0	0	0	0	0	0	1	0	0	0	0	0	0	0	0	0	0	0	0	0	0	0	0	0	0	0	0	0	0	0
Meta-Protein 4403	BLAST_AGUA_MYCCT Putative agmatine deiminase OS=Mycoplasma capricolum subsp. capricolum (strain California kid / ATCC 27343 / NCTC 10154) GN=aguA PE=3 SV=1_Q2SRJ6	Complete proteome;Hydrolase;	;3.5.3.12;;	3.5.3.12;	;K10536;;	K10536;	UniRef50_Q8GWW7	UniRef90_Q6MSR8	UniRef100_Q2SRJ6	Bacteria	Mycoplasma capricolum subsp. capricolum ATCC 27343	unknown	Mollicutes	Mycoplasmatales	Mycoplasmataceae	Mycoplasma	Mycoplasma capricolum subsp. capricolum ATCC 27343	Mycoplasma capricolum subsp. capricolum	1	0	0	0	0	0	0	0	0	0	0	0	0	0	0	0	0	0	0	1	0	0	0	0	0	0	0	0	0	0	0
Meta-Protein 899	BLAST_NUDT8_ARATH Nudix hydrolase 8 OS=Arabidopsis thaliana GN=NUDT8 PE=2 SV=2_Q8L7W2	3D-structure;Cell membrane;Complete proteome;Glycoprotein;Hydrolase;Lipid biosynthesis;Lipid metabolism;Lipoprotein;Magnesium;Manganese;Membrane;Metal-binding;Phospholipid biosynthesis;Phospholipid metabolism;Reference proteome;Signal;Sugar transport;Transferase;Transmembrane;Transmembrane helix;Transport;	;;2.7.8.5;3.6.1.-;;	;2.7.8.5;3.6.1.-;	;;K00995;K02027;;	;K00995;K02027;	UniRef50_P46322	UniRef90_P46322	UniRef100_P46322	cellular organisms	cellular organisms	unknown	cellular organisms	cellular organisms	cellular organisms	cellular organisms	cellular organisms	cellular organisms	15	0	0	1	4	3	2	0	0	0	3	0	1	0	0	0	1	0	0	0	0	0	0	0	0	0	0	0	0	0	0
Meta-Protein 3886	Metagenome unknown		;;		;;					Uncategorized	Uncategorized	unknown	Uncategorized	Uncategorized	Uncategorized	Uncategorized	Uncategorized	Uncategorized	5	0	0	0	0	0	1	0	0	0	0	2	1	0	0	0	1	0	0	0	0	0	0	0	0	0	0	0	0	0	0
Meta-Protein 625	BLAST_ACEA_PSEAE Isocitrate lyase OS=Pseudomonas aeruginosa (strain ATCC 15692 / DSM 22644 / CIP 104116 / JCM 14847 / LMG 12228 / 1C / PRS 101 / PAO1) GN=PA2634 PE=1 SV=1_Q9I0K4	Complete proteome;Direct protein sequencing;Glyoxylate bypass;Lyase;Magnesium;Metal-binding;Reference proteome;Tricarboxylic acid cycle;	;4.1.3.1;;	4.1.3.1;	;K01637;;	K01637;	UniRef50_O50078	UniRef90_Q9I0K4	UniRef100_Q9I0K4	Bacteria	Pseudomonas aeruginosa PAO1	unknown	Gammaproteobacteria	Pseudomonadales	Pseudomonadaceae	Pseudomonas	Pseudomonas aeruginosa	Pseudomonas aeruginosa PAO1	14	1	1	0	5	4	3	0	0	0	0	0	0	0	0	0	0	0	0	0	0	0	0	0	0	0	0	0	0	0	0
Meta-Protein 1376	BLAST_XYLA_BACV8 Xylose isomerase OS=Bacteroides vulgatus (strain ATCC 8482 / DSM 1447 / JCM 5826 / NBRC 14291 / NCTC 11154) GN=xylA PE=3 SV=1_A6L792	3D-structure;Carbohydrate metabolism;Complete proteome;Cytoplasm;Isomerase;Magnesium;Metal-binding;Pentose shunt;Reference proteome;Xylose metabolism;	;5.3.1.5;;	5.3.1.5;	;K01805;;	K01805;	UniRef50_Q8A9M2	UniRef90_Q8A9M2	UniRef100_Q8A9M2	Bacteria	Bacteroides	unknown	Bacteroidia	Bacteroidales	Bacteroidaceae	Bacteroides	Bacteroides	Bacteroides	11	0	0	0	0	0	0	0	0	0	0	0	0	0	0	0	0	0	0	1	3	0	0	0	5	1	0	1	0	0	0
Meta-Protein 309	BLAST_AMP_CLOTM Putative aminopeptidase OS=Clostridium thermocellum GN=celM PE=3 SV=1_P55742	Aminopeptidase;Hydrolase;Metal-binding;Metalloprotease;Protease;	;3.4.11.-;;	3.4.11.-;	;;;	;	UniRef50_O59196	UniRef90_P55742	UniRef100_P55742	Bacteria	Clostridium thermocellum	unknown	Clostridia	Clostridiales	Clostridiaceae	Clostridium	Clostridium thermocellum	Clostridium thermocellum	12	1	1	1	1	0	0	0	0	0	2	2	4	0	0	0	0	0	0	0	0	0	0	0	0	0	0	0	0	0	0
Meta-Protein 3061	Metagenome unknown		;;		;;					Uncategorized	Uncategorized	unknown	Uncategorized	Uncategorized	Uncategorized	Uncategorized	Uncategorized	Uncategorized	27	2	2	2	3	4	3	3	5	3	0	0	0	0	0	0	0	0	0	0	0	0	0	0	0	0	0	0	0	0	0
Meta-Protein 3292	ENO1_LACPL Enolase 1 OS=Lactobacillus plantarum (strain ATCC BAA-793 / NCIMB 8826 / WCFS1) GN=eno1 PE=3 SV=1	Complete proteome;Cytoplasm;Glycolysis;Lyase;Magnesium;Metal-binding;Reference proteome;Secreted;	;4.2.1.11;;	4.2.1.11;	;K01689;;	K01689;	UniRef50_P40370	UniRef90_Q88YH3	UniRef100_Q88YH3	Bacteria	Lactobacillus plantarum WCFS1	unknown	Bacilli	Lactobacillales	Lactobacillaceae	Lactobacillus	Lactobacillus plantarum	Lactobacillus plantarum WCFS1	5	2	0	0	1	0	0	0	0	1	0	0	0	0	0	0	0	0	0	0	0	0	1	0	0	0	0	0	0	0	0
Meta-Protein 3100	Metagenome unknown		;;		;;					Uncategorized	Uncategorized	unknown	Uncategorized	Uncategorized	Uncategorized	Uncategorized	Uncategorized	Uncategorized	39	4	7	6	6	4	3	5	3	1	0	0	0	0	0	0	0	0	0	0	0	0	0	0	0	0	0	0	0	0	0
Meta-Protein 2340	RS15_BACV8 30S ribosomal protein S15 OS=Bacteroides vulgatus (strain ATCC 8482 / DSM 1447 / JCM 5826 / NBRC 14291 / NCTC 11154) GN=rpsO PE=3 SV=1	Complete proteome;RNA-binding;Reference proteome;Ribonucleoprotein;Ribosomal protein;rRNA-binding;	;;;	;	;K02956;;	K02956;	UniRef50_Q3AQL1	UniRef90_A6KYS7	UniRef100_A6KYS7	Bacteria	Bacteroides	unknown	Bacteroidia	Bacteroidales	Bacteroidaceae	Bacteroides	Bacteroides	Bacteroides	3	0	0	0	0	0	0	0	0	0	0	0	0	0	0	0	0	0	0	0	0	0	0	0	0	2	0	0	0	0	0
Meta-Protein 3327	BLAST_AOR_PYRAB Tungsten-containing aldehyde ferredoxin oxidoreductase OS=Pyrococcus abyssi (strain GE5 / Orsay) GN=aor PE=3 SV=1_Q9V035	4Fe-4S;Complete proteome;Iron;Iron-sulfur;Metal-binding;Oxidoreductase;Tungsten;	;1.2.7.5;;	1.2.7.5;	;K03738;;	K03738;	UniRef50_Q51739	UniRef90_Q9V035	UniRef100_Q9V035	Archaea	Pyrococcus abyssi GE5	unknown	Thermococci	Thermococcales	Thermococcaceae	Pyrococcus	Pyrococcus abyssi	Pyrococcus abyssi GE5	1	0	1	0	0	0	0	0	0	0	0	0	0	0	0	0	0	0	0	0	0	0	0	0	0	0	0	0	0	0	0
Meta-Protein 1711	Metagenome Unknown		;;		;;					Uncategorized	Uncategorized	unknown	Uncategorized	Uncategorized	Uncategorized	Uncategorized	Uncategorized	Uncategorized	17	0	0	0	0	0	0	0	0	0	0	0	0	0	0	0	0	0	0	2	4	0	0	0	4	0	0	0	2	3	2
Meta-Protein 3351	BLAST_RRBR2_CLOAB Reverse rubrerythrin-2 OS=Clostridium acetobutylicum (strain ATCC 824 / DSM 792 / JCM 1419 / LMG 5710 / VKM B-1787) GN=rbr3B PE=1 SV=1_Q97D83	Complete proteome;Detoxification;Direct protein sequencing;Electron transport;Iron;Metal-binding;NAD;Oxidoreductase;Peroxidase;Reference proteome;Stress response;Transport;	;1.11.1.1;;	1.11.1.1;	;;;	;	UniRef50_Q97D83	UniRef90_Q97D83	EMPTY	Bacteria	Clostridium acetobutylicum ATCC 824	unknown	Clostridia	Clostridiales	Clostridiaceae	Clostridium	Clostridium acetobutylicum	Clostridium acetobutylicum ATCC 824	9	0	1	2	2	1	0	1	1	1	0	0	0	0	0	0	0	0	0	0	0	0	0	0	0	0	0	0	0	0	0
Meta-Protein 2177	TPM4_RAT Tropomyosin alpha-4 chain OS=Rattus norvegicus GN=Tpm4 PE=1 SV=3	Acetylation;Actin-binding;Alternative splicing;Calcium;Coiled coil;Complete proteome;Cytoplasm;Cytoskeleton;Direct protein sequencing;Disease mutation;Metal-binding;Muscle protein;Nemaline myopathy;Phosphoprotein;Polymorphism;Reference proteome;	;;;	;	;;K10373;K10374;K10375;;	;K10373;K10374;K10375;	EMPTY	EMPTY	EMPTY	Eukaryota	Metazoa	unknown	Tetrapoda	Tetrapoda	Tetrapoda	Tetrapoda	Tetrapoda	Tetrapoda	4	0	0	0	0	0	0	0	0	0	0	0	0	0	0	0	0	0	0	0	0	0	1	0	0	2	0	1	0	0	0
Meta-Protein 1133	BLAST_XYNZ_CLOTH Endo-1,4-beta-xylanase Z OS=Clostridium thermocellum (strain ATCC 27405 / DSM 1237 / NBRC 103400 / NCIMB 10682 / NRRL B-4536 / VPI 7372) GN=xynZ PE=1 SV=3_P10478	3D-structure;Carbohydrate metabolism;Complete proteome;Disulfide bond;Glycosidase;Hydrolase;Multifunctional enzyme;Polysaccharide degradation;Reference proteome;Signal;Xylan degradation;	;3.1.1.73;3.2.1.8;;	3.1.1.73;3.2.1.8;	;;K01181;;	;K01181;	EMPTY	EMPTY	EMPTY	Bacteria	Bacteria	unknown	Bacteria	Bacteria	Bacteria	Bacteria	Bacteria	Bacteria	3	0	0	0	0	0	0	2	1	0	0	0	0	0	0	0	0	0	0	0	0	0	0	0	0	0	0	0	0	0	0
Meta-Protein 2161	BLAST_BGLS_BUTFI Beta-glucosidase A OS=Butyrivibrio fibrisolvens GN=bglA PE=3 SV=1_P16084	Carbohydrate metabolism;Cellulose degradation;Complete proteome;Glycoprotein;Glycosidase;Hydrolase;Polysaccharide degradation;Reference proteome;Secreted;Signal;	;3.2.1.21;;	3.2.1.21;	;;;	;	EMPTY	EMPTY	EMPTY	cellular organisms	cellular organisms	unknown	cellular organisms	cellular organisms	cellular organisms	cellular organisms	cellular organisms	cellular organisms	2	0	0	0	0	0	0	0	0	0	0	0	0	0	0	0	0	0	0	0	0	0	1	1	0	0	0	0	0	0	0
Meta-Protein 950	BLAST_THIC_METMJ Phosphomethylpyrimidine synthase OS=Methanoculleus marisnigri (strain ATCC 35101 / DSM 1498 / JR1) GN=thiC PE=3 SV=1_A3CVT7	4Fe-4S;Complete proteome;Iron;Iron-sulfur;Lyase;Metal-binding;S-adenosyl-L-methionine;Thiamine biosynthesis;Zinc;	;4.1.99.17;;	4.1.99.17;	;K03147;;	K03147;	UniRef50_P61425	UniRef90_A3CVT7	UniRef100_A3CVT7	Archaea	Methanoculleus marisnigri JR1	unknown	Methanomicrobia	Methanomicrobiales	Methanomicrobiaceae	Methanoculleus	Methanoculleus marisnigri	Methanoculleus marisnigri JR1	14	0	0	0	1	1	0	4	4	2	0	0	0	0	0	0	1	1	0	0	0	0	0	0	0	0	0	0	0	0	0
Meta-Protein 2361	BLAST_NANH_BACFR Sialidase OS=Bacteroides fragilis (strain YCH46) GN=nanH PE=3 SV=2_P31206	Complete proteome;Glycosidase;Hydrolase;Periplasm;Repeat;Signal;	;3.2.1.18;;	3.2.1.18;	;K01186;;	K01186;	UniRef50_P31206	UniRef90_P31206	UniRef100_P31206	Bacteria	Bacteroides fragilis YCH46	unknown	Bacteroidia	Bacteroidales	Bacteroidaceae	Bacteroides	Bacteroides fragilis	Bacteroides fragilis YCH46	3	0	0	0	0	0	0	0	0	0	0	0	0	0	0	0	0	0	0	0	0	0	0	0	0	1	0	2	0	0	0
Meta-Protein 2455	BLAST_EFP_CLOTH Elongation factor P OS=Clostridium thermocellum (strain ATCC 27405 / DSM 1237 / NBRC 103400 / NCIMB 10682 / NRRL B-4536 / VPI 7372) GN=efp PE=1 SV=1_A3DDQ3	3D-structure;Complete proteome;Cytoplasm;Elongation factor;Protein biosynthesis;Reference proteome;	;;;	;	;K02356;;	K02356;	UniRef50_A3DDQ3	UniRef90_A3DDQ3	UniRef100_A3DDQ3	Bacteria	Clostridium	unknown	Clostridia	Clostridiales	Clostridiaceae	Clostridium	Clostridium	Clostridium	1	0	0	0	0	0	0	0	0	0	0	0	0	0	0	0	0	0	0	0	0	0	0	0	0	0	1	0	0	0	0
Meta-Protein 425	BLAST_SAPA_ECOLI Probable ABC transporter periplasmic-binding protein SapA OS=Escherichia coli (strain K12) GN=sapA PE=3 SV=1_Q47622	Complete proteome;Periplasm;Reference proteome;Signal;Transport;	;;;	;	;K13889;K19226;;	K13889;K19226;	EMPTY	EMPTY	EMPTY	Bacteria	Enterobacteriaceae	unknown	Gammaproteobacteria	Enterobacteriales	Enterobacteriaceae	Enterobacteriaceae	Enterobacteriaceae	Enterobacteriaceae	18	4	4	4	1	2	0	1	1	1	0	0	0	0	0	0	0	0	0	0	0	0	0	0	0	0	0	0	0	0	0
Meta-Protein 5123	BLAST_FEPA_ECOLI Ferrienterobactin receptor OS=Escherichia coli (strain K12) GN=fepA PE=1 SV=2_P05825	3D-structure;Cell outer membrane;Complete proteome;Ion transport;Iron;Iron transport;Membrane;Receptor;Reference proteome;Signal;TonB box;Transmembrane;Transmembrane beta strand;Transport;	;;;	;	;K19611;;	K19611;	UniRef50_P05825	UniRef90_P05825	UniRef100_P05825	Bacteria	Escherichia coli K-12	unknown	Gammaproteobacteria	Enterobacteriales	Enterobacteriaceae	Escherichia	Escherichia coli	Escherichia coli K-12	2	0	0	0	0	0	0	0	0	0	0	0	0	0	0	0	0	0	0	0	0	0	0	0	0	0	0	0	0	0	0
Meta-Protein 4934	BLAST_RS11_BACFR 30S ribosomal protein S11 OS=Bacteroides fragilis (strain YCH46) GN=rpsK PE=3 SV=1_Q64NN3	Complete proteome;RNA-binding;Reference proteome;Ribonucleoprotein;Ribosomal protein;rRNA-binding;	;;;	;	;K02948;;	K02948;	UniRef50_P48136	UniRef90_A6KYH2	UniRef100_Q5L8D4	Bacteria	Bacteroides	unknown	Bacteroidia	Bacteroidales	Bacteroidaceae	Bacteroides	Bacteroides	Bacteroides	1	0	0	0	0	0	0	0	0	0	0	0	0	0	0	0	0	0	0	0	0	0	0	0	0	0	0	1	0	0	0
Meta-Protein 1934	BLAST_SECD_HELPY Protein translocase subunit SecD OS=Helicobacter pylori (strain ATCC 700392 / 26695) GN=secD PE=3 SV=2_O26074	Cell inner membrane;Cell membrane;Complete proteome;Membrane;Protein transport;Reference proteome;Translocation;Transmembrane;Transmembrane helix;Transport;	;;;	;	;K03072;;	K03072;	EMPTY	EMPTY	EMPTY	Bacteria	Bacteria	unknown	Bacteria	Bacteria	Bacteria	Bacteria	Bacteria	Bacteria	22	0	0	0	0	0	0	0	0	0	0	0	0	0	0	0	0	0	0	0	0	6	11	4	0	0	0	0	0	0	0
Meta-Protein 3680	BLAST_TTRS_SALTY Tetrathionate sensor histidine kinase TtrS OS=Salmonella typhimurium (strain LT2 / SGSC1412 / ATCC 700720) GN=ttrS PE=1 SV=1_Q8ZPP6	ATP-binding;Cell inner membrane;Cell membrane;Complete proteome;Kinase;Membrane;Nucleotide-binding;Phosphoprotein;Reference proteome;Transcription;Transcription regulation;Transferase;Transmembrane;Transmembrane helix;Two-component regulatory system;	;2.7.13.3;;	2.7.13.3;	;K13040;;	K13040;	UniRef50_Q8ZPP6	UniRef90_Q8ZPP6	UniRef100_Q8ZPP6	Bacteria	Salmonella enterica subsp. enterica serovar Typhimurium str. LT2	unknown	Gammaproteobacteria	Enterobacteriales	Enterobacteriaceae	Salmonella	Salmonella enterica subsp. enterica serovar Typhimurium str. LT2	Salmonella enterica subsp. enterica	1	0	0	0	1	0	0	0	0	0	0	0	0	0	0	0	0	0	0	0	0	0	0	0	0	0	0	0	0	0	0
Meta-Protein 3094	BLAST_THS_METKA Thermosome subunit OS=Methanopyrus kandleri (strain AV19 / DSM 6324 / JCM 9639 / NBRC 100938) GN=ths PE=3 SV=1_P50016	ATP-binding;Chaperone;Complete proteome;Nucleotide-binding;Reference proteome;	;;;	;	;;;	;	UniRef50_P50016	UniRef90_P50016	UniRef100_P50016	Archaea	Methanopyrus kandleri AV19	unknown	Methanopyri	Methanopyrales	Methanopyraceae	Methanopyrus	Methanopyrus kandleri	Methanopyrus kandleri AV19	46	6	6	7	7	6	4	3	1	2	3	0	1	0	0	0	0	0	0	0	0	0	0	0	0	0	0	0	0	0	0
Meta-Protein 43	BLAST_DHAK1_LISIN PTS-dependent dihydroxyacetone kinase 1, dihydroxyacetone-binding subunit DhaK OS=Listeria innocua serovar 6a (strain ATCC BAA-680 / CLIP 11262) GN=dhaK-1 PE=3 SV=1_Q927E6	Complete proteome;Cytoplasm;Glycerol metabolism;Kinase;Transferase;	;2.7.1.121;;	2.7.1.121;	;K05878;;	K05878;	UniRef50_Q9CIV8	UniRef90_Q927E6	UniRef100_Q927E6	Bacteria	Listeria innocua Clip11262	unknown	Bacilli	Bacillales	Listeriaceae	Listeria	Listeria innocua	Listeria innocua Clip11262	2	1	1	0	0	0	0	0	0	0	0	0	0	0	0	0	0	0	0	0	0	0	0	0	0	0	0	0	0	0	0
Meta-Protein 5111	BLAST_AMOA_NITEU Ammonia monooxygenase, acetylene-binding OS=Nitrosomonas europaea (strain ATCC 19718 / CIP 103999 / KCTC 2705 / NBRC 14298) GN=amoA1 PE=1 SV=2_Q04507	Cell membrane;Complete proteome;Copper;Cytoplasm;Direct protein sequencing;Membrane;Metal-binding;Monooxygenase;Oxidoreductase;Reference proteome;Transmembrane;Transmembrane helix;	;1.14.99.39;;	1.14.99.39;	;K10944;;	K10944;	UniRef50_Q04507	UniRef90_Q04507	UniRef100_Q04507	Bacteria	Nitrosomonas europaea ATCC 19718	unknown	Betaproteobacteria	Nitrosomonadales	Nitrosomonadaceae	Nitrosomonas	Nitrosomonas europaea	Nitrosomonas europaea ATCC 19718	2	0	0	0	0	0	0	0	0	0	0	0	0	0	0	0	0	0	0	0	0	0	0	0	0	0	0	0	0	0	0
Meta-Protein 2254	BLAST_DEOD_LACBA Purine nucleoside phosphorylase DeoD-type OS=Lactobacillus brevis (strain ATCC 367 / JCM 1170) GN=deoD PE=3 SV=1_Q03Q52	3D-structure;Complete proteome;Cytoplasm;Direct protein sequencing;Glycosyltransferase;Reference proteome;Transferase;	;2.4.2.1;2.4.2.3;;	2.4.2.1;2.4.2.3;	;;K00757;K03784;;	;K00757;K03784;	EMPTY	EMPTY	UniRef100_Q03Q52	Bacteria	Bacteria	unknown	Bacteria	Bacteria	Bacteria	Bacteria	Bacteria	Bacteria	3	0	0	0	0	0	0	0	0	0	0	0	0	0	0	0	0	0	0	0	0	0	0	0	0	1	0	0	0	0	0
Meta-Protein 2677	BLAST_BDS1_YEAST Alkyl/aryl-sulfatase BDS1 OS=Saccharomyces cerevisiae (strain ATCC 204508 / S288c) GN=BDS1 PE=1 SV=1_Q08347	3D-structure;Acetylation;Cell inner membrane;Cell membrane;Complete proteome;Direct protein sequencing;FAD;Flavoprotein;Hydrolase;Membrane;Metal-binding;NAD;Oxidoreductase;Plasmid;Reference proteome;Signal;Zinc;	;1.1.99.-;1.1.99.1;1.2.1.8;3.1.6.-;;	1.1.99.-;1.1.99.1;1.2.1.8;3.1.6.-;	;;K00108;;	;K00108;	UniRef50_P32717	UniRef90_P32717	UniRef100_P32717	cellular organisms	cellular organisms	unknown	cellular organisms	cellular organisms	cellular organisms	cellular organisms	cellular organisms	cellular organisms	15	0	0	0	0	0	0	0	0	0	0	0	0	0	0	0	0	0	0	0	0	0	0	0	0	0	0	0	0	0	0
Meta-Protein 2846	Metagenome unknown		;;		;;					Uncategorized	Uncategorized	unknown	Uncategorized	Uncategorized	Uncategorized	Uncategorized	Uncategorized	Uncategorized	32	4	5	3	4	3	3	1	3	2	2	1	1	0	0	0	0	0	0	0	0	0	0	0	0	0	0	0	0	0	0
Meta-Protein 1515	BLAST_FUCO_ECOLI Lactaldehyde reductase OS=Escherichia coli (strain K12) GN=fucO PE=1 SV=2_P0A9S1	3D-structure;Carbohydrate metabolism;Complete proteome;Fucose metabolism;Iron;Metal-binding;NAD;Oxidoreductase;Reference proteome;	;1.1.1.77;;	1.1.1.77;	;K00048;;	K00048;	UniRef50_P0A9S2	UniRef90_P0A9S2	UniRef100_P0A9S2	Bacteria	Escherichia coli	unknown	Gammaproteobacteria	Enterobacteriales	Enterobacteriaceae	Escherichia	Escherichia coli	Escherichia coli	17	0	0	0	0	0	0	0	0	0	0	0	0	0	0	0	0	0	0	3	2	1	3	2	3	0	1	0	1	0	0
Meta-Protein 4701	BLAST_RTN4R_HUMAN Reticulon-4 receptor OS=Homo sapiens GN=RTN4R PE=1 SV=1_Q9BZR6	3D-structure;Cell membrane;Cell projection;Complete proteome;Direct protein sequencing;Disease mutation;Disulfide bond;GPI-anchor;Glycoprotein;Leucine-rich repeat;Lipid-binding;Lipoprotein;Membrane;Polymorphism;Receptor;Reference proteome;Repeat;Schizophrenia;Signal;	;;;	;	;K16659;;	K16659;	UniRef50_Q9BZR6	UniRef90_Q9BZR6	UniRef100_Q9BZR6	Eukaryota	Metazoa	unknown	Mammalia	Primates	Hominidae	Homo	Homo sapiens	Homo sapiens	1	0	0	0	0	0	0	0	0	0	0	0	0	0	0	0	0	0	0	0	0	0	1	0	0	0	0	0	0	0	0
Meta-Protein 5073	Metagenome unknown		;;		;;					Uncategorized	Uncategorized	unknown	Uncategorized	Uncategorized	Uncategorized	Uncategorized	Uncategorized	Uncategorized	1	0	0	0	0	0	0	0	0	0	0	0	0	0	0	0	0	0	0	0	0	0	0	0	0	0	0	0	0	0	0
Meta-Protein 2001	Metagenome Unknown		;;		;;					Uncategorized	Uncategorized	unknown	Uncategorized	Uncategorized	Uncategorized	Uncategorized	Uncategorized	Uncategorized	13	0	0	0	0	0	0	0	0	0	0	0	0	0	0	0	0	0	0	0	0	3	3	3	0	0	0	0	0	0	0
Meta-Protein 855	BLAST_HNDC_DESFR NADP-reducing hydrogenase subunit HndC OS=Desulfovibrio fructosivorans GN=hndC PE=1 SV=1_Q46507	4Fe-4S;Iron;Iron-sulfur;Metal-binding;NADP;Oxidoreductase;Repeat;	;1.12.1.3;;	1.12.1.3;	;K18331;;	K18331;	UniRef50_Q46507	UniRef90_Q46507	UniRef100_Q46507	Bacteria	Desulfovibrio fructosovorans	unknown	Deltaproteobacteria	Desulfovibrionales	Desulfovibrionaceae	Desulfovibrio	Desulfovibrio fructosovorans	Desulfovibrio fructosovorans	1	0	1	0	0	0	0	0	0	0	0	0	0	0	0	0	0	0	0	0	0	0	0	0	0	0	0	0	0	0	0
Meta-Protein 5184	Metagenome unknown		;;		;;					Uncategorized	Uncategorized	unknown	Uncategorized	Uncategorized	Uncategorized	Uncategorized	Uncategorized	Uncategorized	1	0	0	0	0	0	0	0	0	0	0	0	0	0	0	0	0	0	0	0	0	0	0	0	0	0	0	0	0	0	0
Meta-Protein 1476	BLAST_G3P_RALSO Glyceraldehyde-3-phosphate dehydrogenase OS=Ralstonia solanacearum (strain GMI1000) GN=gapA PE=3 SV=2_P52694	Complete proteome;Cytoplasm;Glycolysis;NAD;Nucleotide-binding;Oxidoreductase;Reference proteome;	;1.2.1.12;;	1.2.1.12;	;K00134;;	K00134;	EMPTY	EMPTY	EMPTY	cellular organisms	cellular organisms	unknown	cellular organisms	cellular organisms	cellular organisms	cellular organisms	cellular organisms	cellular organisms	123	0	0	0	0	0	0	0	0	0	0	0	0	0	0	0	0	0	0	11	14	4	3	0	10	20	12	14	2	2	2
Meta-Protein 3810	Metagenome unknown		;;		;;					Uncategorized	Uncategorized	unknown	Uncategorized	Uncategorized	Uncategorized	Uncategorized	Uncategorized	Uncategorized	5	0	0	0	0	1	2	0	0	0	0	0	0	0	1	1	0	0	0	0	0	0	0	0	0	0	0	0	0	0	0
Meta-Protein 4777	BLAST_FIMC_ECOL6 Chaperone protein FimC OS=Escherichia coli O6:H1 (strain CFT073 / ATCC 700928 / UPEC) GN=fimC PE=3 SV=1_P59590	Chaperone;Complete proteome;Fimbrium biogenesis;Immunoglobulin domain;Periplasm;Signal;	;;;	;	;K07346;;	K07346;	UniRef50_P31697	UniRef90_P31697	UniRef100_P59590	Bacteria	Escherichia coli CFT073	unknown	Gammaproteobacteria	Enterobacteriales	Enterobacteriaceae	Escherichia	Escherichia coli	Escherichia coli CFT073	1	0	0	0	0	0	0	0	0	0	0	0	0	0	0	0	0	0	0	0	0	0	0	0	1	0	0	0	0	0	0
Meta-Protein 4362	BLAST_GCSPA_GEOSW Probable glycine dehydrogenase (decarboxylating) subunit 1 OS=Geobacillus sp. (strain WCH70) GN=gcvPA PE=3 SV=1_C5D4A1	Complete proteome;Oxidoreductase;Reference proteome;	;1.4.4.2;;	1.4.4.2;	;K00282;;	K00282;	UniRef50_P54376	UniRef90_C5D4A1	UniRef100_C5D4A1	Bacteria	Geobacillus sp. WCH70	unknown	Bacilli	Bacillales	Bacillaceae	Geobacillus	Geobacillus sp. WCH70	Geobacillus sp. WCH70	1	0	0	0	0	0	0	0	0	0	0	0	0	0	0	0	0	0	0	1	0	0	0	0	0	0	0	0	0	0	0
Meta-Protein 4025	Y2373_BACSK UPF0348 protein ABC2373 OS=Bacillus clausii (strain KSM-K16) GN=ABC2373 PE=3 SV=1	Complete proteome;Reference proteome;	;;;	;	;;;	;	UniRef50_Q5WFF2	UniRef90_Q5WFF2	UniRef100_Q5WFF2	Bacteria	Bacillus clausii KSM-K16	unknown	Bacilli	Bacillales	Bacillaceae	Bacillus	Bacillus clausii	Bacillus clausii KSM-K16	1	0	0	0	0	0	0	1	0	0	0	0	0	0	0	0	0	0	0	0	0	0	0	0	0	0	0	0	0	0	0
Meta-Protein 1244	BLAST_GYRA_STAEP DNA gyrase subunit A (Fragment) OS=Staphylococcus epidermidis GN=gyrA PE=1 SV=1_P0C0Q9	ATP-binding;Antibiotic resistance;Cytoplasm;DNA-binding;Isomerase;Nucleotide-binding;Topoisomerase;	;5.99.1.3;;	5.99.1.3;	;;;	;	UniRef50_P05653	UniRef90_Q5HK04	UniRef100_P0C0Q9	Bacteria	Staphylococcus epidermidis	unknown	Bacilli	Bacillales	Staphylococcaceae	Staphylococcus	Staphylococcus epidermidis	Staphylococcus epidermidis	1	0	0	0	0	0	0	0	0	0	1	0	0	0	0	0	0	0	0	0	0	0	0	0	0	0	0	0	0	0	0
Meta-Protein 686	BLAST_YHCH_BACSU Uncharacterized ABC transporter ATP-binding protein YhcH OS=Bacillus subtilis (strain 168) GN=yhcH PE=3 SV=1_P54592	ATP-binding;Cell inner membrane;Cell membrane;Complete proteome;Membrane;Nucleotide-binding;Reference proteome;Transmembrane;Transmembrane helix;Transport;	;;;	;	;K01990;K02034;;	K01990;K02034;	EMPTY	EMPTY	UniRef100_P54592	Bacteria	Bacteria	unknown	Bacteria	Bacteria	Bacteria	Bacteria	Bacteria	Bacteria	6	1	1	2	0	0	0	1	1	0	0	0	0	0	0	0	0	0	0	0	0	0	0	0	0	0	0	0	0	0	0
Meta-Protein 4943	Metagenome Unknown		;;		;;					Uncategorized	Uncategorized	unknown	Uncategorized	Uncategorized	Uncategorized	Uncategorized	Uncategorized	Uncategorized	1	0	0	0	0	0	0	0	0	0	0	0	0	0	0	0	0	0	0	0	0	0	0	0	0	0	0	1	0	0	0
Meta-Protein 104	BLAST_MDH_PYRAB Malate dehydrogenase OS=Pyrococcus abyssi (strain GE5 / Orsay) GN=mdh PE=3 SV=1_Q9V0D5	3D-structure;Complete proteome;Cytoplasm;NAD;Oxidoreductase;Tricarboxylic acid cycle;	;1.1.1.37;;	1.1.1.37;	;;;	;	UniRef50_O59028	EMPTY	EMPTY	Archaea	Pyrococcus	unknown	Thermococci	Thermococcales	Thermococcaceae	Pyrococcus	Pyrococcus	Pyrococcus	49	11	10	6	3	2	4	2	4	2	4	1	0	0	0	0	0	0	0	0	0	0	0	0	0	0	0	0	0	0	0
Meta-Protein 4726	Metagenome Unknown		;;		;;					Uncategorized	Uncategorized	unknown	Uncategorized	Uncategorized	Uncategorized	Uncategorized	Uncategorized	Uncategorized	1	0	0	0	0	0	0	0	0	0	0	0	0	0	0	0	0	0	0	0	0	0	0	1	0	0	0	0	0	0	0
Meta-Protein 4952	BLAST_EFP_CLOTH Elongation factor P OS=Clostridium thermocellum (strain ATCC 27405 / DSM 1237 / NBRC 103400 / NCIMB 10682 / NRRL B-4536 / VPI 7372) GN=efp PE=1 SV=1_A3DDQ3	3D-structure;Complete proteome;Cytoplasm;Elongation factor;Protein biosynthesis;Reference proteome;	;;;	;	;K02356;;	K02356;	UniRef50_A3DDQ3	UniRef90_A3DDQ3	UniRef100_A3DDQ3	Bacteria	Clostridium thermocellum ATCC 27405	unknown	Clostridia	Clostridiales	Clostridiaceae	Clostridium	Clostridium thermocellum	Clostridium thermocellum ATCC 27405	1	0	0	0	0	0	0	0	0	0	0	0	0	0	0	0	0	0	0	0	0	0	0	0	0	0	0	0	1	0	0
Meta-Protein 4126	Metagenome unknown		;;		;;					Uncategorized	Uncategorized	unknown	Uncategorized	Uncategorized	Uncategorized	Uncategorized	Uncategorized	Uncategorized	2	0	0	0	0	0	0	0	0	0	1	0	0	0	0	0	1	0	0	0	0	0	0	0	0	0	0	0	0	0	0
Meta-Protein 1941	BLAST_SUSC_BACTN TonB-dependent receptor SusC OS=Bacteroides thetaiotaomicron (strain ATCC 29148 / DSM 2079 / NCTC 10582 / E50 / VPI-5482) GN=susC PE=1 SV=1_Q8A1G1	Carbohydrate metabolism;Cell outer membrane;Complete proteome;Membrane;Receptor;Reference proteome;Signal;TonB box;Transmembrane;Transmembrane beta strand;Transport;	;;;	;	;K21573;;	K21573;	UniRef50_Q8A1G1	UniRef90_Q8A1G1	UniRef100_Q8A1G1	Bacteria	Bacteria	unknown	Bacteria	Bacteria	Bacteria	Bacteria	Bacteria	Bacteria	14	0	0	0	0	0	0	0	0	0	0	0	0	0	0	0	0	0	0	0	0	1	6	5	2	0	0	0	0	0	0
Meta-Protein 2704	BLAST_Y4789_VEREI UPF0246 protein Veis_4789 OS=Verminephrobacter eiseniae (strain EF01-2) GN=Veis_4789 PE=3 SV=1_A1WS74	3D-structure;Complete proteome;Cytoplasm;Direct protein sequencing;Electron transport;Iron;Metal-binding;Reference proteome;Transport;	;;;	;	;;K09861;;	;K09861;	UniRef50_Q9AGG3	UniRef90_Q9AGG3	UniRef100_Q9AGG3	Bacteria	Bacteria	unknown	Bacteria	Bacteria	Bacteria	Bacteria	Bacteria	Bacteria	1	0	0	0	0	0	0	0	0	0	0	0	0	0	0	0	0	0	0	0	0	0	0	0	0	0	0	0	0	0	0
Meta-Protein 3514	BLAST_Y1037_HAEIN Putative glutamine amidotransferase HI_1037 OS=Haemophilus influenzae (strain ATCC 51907 / DSM 11121 / KW20 / Rd) GN=HI_1037 PE=4 SV=1_P44098	Complete proteome;Glutamine amidotransferase;Reference proteome;Transferase;	;2.4.2.-;;	2.4.2.-;	;;;	;	UniRef50_Q47147	UniRef90_P44098	UniRef100_P44098	Bacteria	Haemophilus influenzae Rd KW20	unknown	Gammaproteobacteria	Pasteurellales	Pasteurellaceae	Haemophilus	Haemophilus influenzae	Haemophilus influenzae Rd KW20	1	0	0	1	0	0	0	0	0	0	0	0	0	0	0	0	0	0	0	0	0	0	0	0	0	0	0	0	0	0	0
Meta-Protein 3387	BLAST_SP5AD_BACSU Stage V sporulation protein AD OS=Bacillus subtilis (strain 168) GN=spoVAD PE=1 SV=1_P40869	3D-structure;Complete proteome;Reference proteome;Sporulation;	;;;	;	;K06406;;	K06406;	UniRef50_P40869	UniRef90_P40869	UniRef100_P40869	Bacteria	Bacillus subtilis subsp. subtilis str. 168	unknown	Bacilli	Bacillales	Bacillaceae	Bacillus	Bacillus subtilis subsp. subtilis str. 168	Bacillus subtilis subsp. subtilis	1	0	1	0	0	0	0	0	0	0	0	0	0	0	0	0	0	0	0	0	0	0	0	0	0	0	0	0	0	0	0
Meta-Protein 2239	BLAST_PRO7_ORYSI Prolamin PPROL 14E OS=Oryza sativa subsp. indica PE=3 SV=1_P0C5E5	Complete proteome;Pyrrolidone carboxylic acid;Reference proteome;Seed storage protein;Signal;Storage protein;Vacuole;	;;;	;	;;;	;	UniRef50_P0C5E5	UniRef90_P0C5E5	UniRef100_P0C5E5	Eukaryota	Viridiplantae	unknown	Liliopsida	Poales	Poaceae	Oryza	Oryza sativa	Oryza sativa	16	0	0	0	0	0	0	0	0	0	0	0	0	0	0	0	0	0	0	0	0	0	0	0	2	0	0	0	3	0	0
Meta-Protein 3252	BLAST_PORD_PSEAE Porin D OS=Pseudomonas aeruginosa (strain ATCC 15692 / DSM 22644 / CIP 104116 / JCM 14847 / LMG 12228 / 1C / PRS 101 / PAO1) GN=oprD PE=1 SV=1_P32722	3D-structure;Cell outer membrane;Complete proteome;Direct protein sequencing;Hydrolase;Ion transport;Membrane;Porin;Protease;Reference proteome;Serine protease;Signal;Transmembrane;Transmembrane beta strand;Transport;	;3.4.21.-;;	3.4.21.-;	;K18093;;	K18093;	UniRef50_P32722	UniRef90_P32722	UniRef100_P32722	Bacteria	Pseudomonas aeruginosa PAO1	unknown	Gammaproteobacteria	Pseudomonadales	Pseudomonadaceae	Pseudomonas	Pseudomonas aeruginosa	Pseudomonas aeruginosa PAO1	5	2	1	1	1	0	0	0	0	0	0	0	0	0	0	0	0	0	0	0	0	0	0	0	0	0	0	0	0	0	0
Meta-Protein 1844	PROF1_HUMAN Profilin-1 OS=Homo sapiens GN=PFN1 PE=1 SV=2	3D-structure;Acetylation;Actin-binding;Amyotrophic lateral sclerosis;Complete proteome;Cytoplasm;Cytoskeleton;Direct protein sequencing;Disease mutation;Isopeptide bond;Neurodegeneration;Phosphoprotein;Reference proteome;Ubl conjugation;	;;;	;	;K05759;;	K05759;	UniRef50_P07737	UniRef90_P07737	UniRef100_P07737	Eukaryota	Metazoa	unknown	Mammalia	Primates	Hominidae	Homo	Homo sapiens	Homo sapiens	1	0	0	0	0	0	0	0	0	0	0	0	0	0	0	0	0	0	0	0	1	0	0	0	0	0	0	0	0	0	0
Meta-Protein 3322	BLAST_IOLE_GEOKA Inosose dehydratase OS=Geobacillus kaustophilus (strain HTA426) GN=iolE PE=3 SV=1_Q5KYR1	Cobalt;Complete proteome;Lyase;Manganese;Reference proteome;	;4.2.1.44;;	4.2.1.44;	;K03335;;	K03335;	UniRef50_Q5KYR1	UniRef90_Q5KYR1	UniRef100_Q5KYR1	Bacteria	Geobacillus kaustophilus HTA426	unknown	Bacilli	Bacillales	Bacillaceae	Geobacillus	Geobacillus kaustophilus	Geobacillus kaustophilus HTA426	3	0	1	1	0	0	1	0	0	0	0	0	0	0	0	0	0	0	0	0	0	0	0	0	0	0	0	0	0	0	0
Meta-Protein 1012	BLAST_VATB_CLOTH V-type ATP synthase beta chain OS=Clostridium thermocellum (strain ATCC 27405 / DSM 1237 / NBRC 103400 / NCIMB 10682 / NRRL B-4536 / VPI 7372) GN=atpB PE=3 SV=1_A3DHP1	ATP synthesis;Complete proteome;Hydrogen ion transport;Ion transport;Reference proteome;Transport;	;;;	;	;K02118;;	K02118;	UniRef50_Q9UXU8	EMPTY	EMPTY	Bacteria	Bacteria	unknown	Bacteria	Bacteria	Bacteria	Bacteria	Bacteria	Bacteria	6	0	0	0	2	2	0	1	1	0	0	0	0	0	0	0	0	0	0	0	0	0	0	0	0	0	0	0	0	0	0
Meta-Protein 4424	EF1A_PICGU Elongation factor 1-alpha OS=Meyerozyma guilliermondii (strain ATCC 6260 / CBS 566 / DSM 6381 / JCM 1539 / NBRC 10279 / NRRL Y-324) GN=TEF1 PE=3 SV=2	Complete proteome;Cytoplasm;Elongation factor;GTP-binding;Methylation;Nucleotide-binding;Protein biosynthesis;Reference proteome;	;;;	;	;K03231;;	K03231;	UniRef50_P0CY35	UniRef90_P0CY35	UniRef100_A5DPE3	Eukaryota	Fungi	unknown	Saccharomycetes	Saccharomycetales	Debaryomycetaceae	Meyerozyma	Meyerozyma guilliermondii	Meyerozyma guilliermondii ATCC 6260	3	0	0	0	0	0	0	0	0	0	0	0	0	0	0	0	0	0	0	1	0	0	0	0	0	0	0	1	1	0	0
Meta-Protein 2479	BLAST_RL17_ALKOO 50S ribosomal protein L17 OS=Alkaliphilus oremlandii (strain OhILAs) GN=rplQ PE=3 SV=1_A8MLH0	Complete proteome;Reference proteome;Ribonucleoprotein;Ribosomal protein;	;;;	;	;K02879;;	K02879;	UniRef50_Q9RSJ5	EMPTY	EMPTY	Bacteria	Clostridia	unknown	Clostridia	Clostridia	Clostridia	Clostridia	Clostridia	Clostridia	1	0	0	0	0	0	0	0	0	0	0	0	0	0	0	0	0	0	0	0	0	0	0	0	0	0	1	0	0	0	0
Meta-Protein 1286	BLAST_SH3Y1_XENLA SH3 domain-containing YSC84-like protein 1 OS=Xenopus laevis GN=sh3yl1 PE=2 SV=1_Q6DFH5	Autoinducer synthesis;Iron;Lyase;Metal-binding;Quorum sensing;SH3 domain;	;;4.4.1.21;;	;4.4.1.21;	;K07173;K20523;;	K07173;K20523;	EMPTY	EMPTY	EMPTY	cellular organisms	cellular organisms	unknown	cellular organisms	cellular organisms	cellular organisms	cellular organisms	cellular organisms	cellular organisms	2	0	0	0	0	0	0	0	0	0	0	1	1	0	0	0	0	0	0	0	0	0	0	0	0	0	0	0	0	0	0
Meta-Protein 2556	Metagenome Unknown		;;		;;					Uncategorized	Uncategorized	unknown	Uncategorized	Uncategorized	Uncategorized	Uncategorized	Uncategorized	Uncategorized	1	0	0	0	0	0	0	0	0	0	0	0	0	0	0	0	0	0	0	0	0	0	0	0	0	0	0	0	0	0	0
Meta-Protein 3628	Metagenome unknown		;;		;;					Uncategorized	Uncategorized	unknown	Uncategorized	Uncategorized	Uncategorized	Uncategorized	Uncategorized	Uncategorized	10	0	0	0	2	1	1	3	2	1	0	0	0	0	0	0	0	0	0	0	0	0	0	0	0	0	0	0	0	0	0
Meta-Protein 1580	BLAST_ETFB_CLOAB Electron transfer flavoprotein subunit beta OS=Clostridium acetobutylicum (strain ATCC 824 / DSM 792 / JCM 1419 / LMG 5710 / VKM B-1787) GN=etfB PE=3 SV=2_P52040	Complete proteome;Cytoplasm;Electron transport;FAD;Flavoprotein;NAD;Oxidoreductase;Reference proteome;Transport;	;;1.3.1.108;;	;1.3.1.108;	;;K03521;;	;K03521;	UniRef50_P52040	UniRef90_P52040	UniRef100_P52040	Bacteria	Clostridiales	unknown	Clostridia	Clostridiales	Clostridiales	Clostridiales	Clostridiales	Clostridiales	125	0	0	0	0	0	0	0	0	0	0	0	0	0	0	0	0	0	0	5	3	2	6	2	5	23	22	15	3	1	4
Meta-Protein 2055	BLAST_YHFE_BACSU Putative aminopeptidase YhfE OS=Bacillus subtilis (strain 168) GN=yhfE PE=3 SV=1_O07603	Aminopeptidase;Complete proteome;Hydrolase;Metal-binding;Metalloprotease;Protease;Reference proteome;	;3.4.11.-;;	3.4.11.-;	;;;	;	UniRef50_O07603	UniRef90_O07603	UniRef100_O07603	Bacteria	Bacillus subtilis subsp. subtilis str. 168	unknown	Bacilli	Bacillales	Bacillaceae	Bacillus	Bacillus subtilis subsp. subtilis str. 168	Bacillus subtilis subsp. subtilis	1	0	0	0	0	0	0	0	0	0	0	0	0	0	0	0	0	0	0	0	0	0	1	0	0	0	0	0	0	0	0
Meta-Protein 5063	Metagenome unknown		;;		;;					Uncategorized	Uncategorized	unknown	Uncategorized	Uncategorized	Uncategorized	Uncategorized	Uncategorized	Uncategorized	1	0	0	0	0	0	0	0	0	0	0	0	0	0	0	0	0	0	0	0	0	0	0	0	0	0	0	0	0	0	0
Meta-Protein 1066	BLAST_MUTB_RHIME Methylmalonyl-CoA mutase OS=Rhizobium meliloti (strain 1021) GN=bhbA PE=3 SV=2_O86028	Cobalamin;Cobalt;Complete proteome;Isomerase;Metal-binding;Plasmid;Reference proteome;	;5.4.99.2;;	5.4.99.2;	;K01847;;	K01847;	UniRef50_P22033	UniRef90_O86028	UniRef100_O86028	Bacteria	Sinorhizobium meliloti 1021	unknown	Alphaproteobacteria	Rhizobiales	Rhizobiaceae	Sinorhizobium	Sinorhizobium meliloti	Sinorhizobium meliloti 1021	2	0	0	0	0	0	1	0	1	0	0	0	0	0	0	0	0	0	0	0	0	0	0	0	0	0	0	0	0	0	0
Meta-Protein 1356	MGA_HUMAN Maltase-glucoamylase, intestinal OS=Homo sapiens GN=MGAM PE=1 SV=5	3D-structure;Alternative splicing;Cell membrane;Complete proteome;Direct protein sequencing;Disulfide bond;Glycoprotein;Glycosidase;Hydrolase;Membrane;Multifunctional enzyme;Phosphoprotein;Polymorphism;Reference proteome;Repeat;Signal-anchor;Sulfation;Transmembrane;Transmembrane helix;	;3.2.1.10;3.2.1.20;3.2.1.3;3.2.1.48;;	3.2.1.10;3.2.1.20;3.2.1.3;3.2.1.48;	;K01203;K12047;;	K01203;K12047;	UniRef50_P14410	UniRef90_O43451	UniRef100_O43451	Eukaryota	Metazoa	unknown	Mammalia	Euarchontoglires	Euarchontoglires	Euarchontoglires	Euarchontoglires	Euarchontoglires	179	0	0	0	0	0	0	0	0	0	0	0	0	0	0	0	0	0	0	14	15	18	26	16	18	22	19	28	0	0	1
Meta-Protein 1234	BLAST_T1M1_ECOLX Type I restriction enzyme EcoR124II M protein OS=Escherichia coli GN=hsdM PE=3 SV=1_P10484	Methyltransferase;Plasmid;Restriction system;S-adenosyl-L-methionine;Transferase;	;2.1.1.72;;	2.1.1.72;	;;;	;	UniRef50_P10484	UniRef90_P10484	UniRef100_Q47163	Bacteria	Escherichia coli	unknown	Gammaproteobacteria	Enterobacteriales	Enterobacteriaceae	Escherichia	Escherichia coli	Escherichia coli	3	0	0	0	0	0	0	0	0	0	2	1	0	0	0	0	0	0	0	0	0	0	0	0	0	0	0	0	0	0	0
Meta-Protein 2491	BLAST_GLGC_EUBE2 Glucose-1-phosphate adenylyltransferase OS=Eubacterium eligens (strain ATCC 27750 / VPI C15-48) GN=glgC PE=3 SV=1_C4Z4L8	ATP-binding;Carbohydrate metabolism;Complete proteome;Glycogen biosynthesis;Glycogen metabolism;Nucleotide-binding;Nucleotidyltransferase;Reference proteome;Transferase;	;2.7.7.27;;	2.7.7.27;	;K00975;;	K00975;	UniRef50_A3DK82	UniRef90_C4Z4L8	UniRef100_C4Z4L8	Bacteria	Eubacterium eligens ATCC 27750	unknown	Clostridia	Clostridiales	Eubacteriaceae	Eubacterium	Eubacterium eligens	Eubacterium eligens ATCC 27750	1	0	0	0	0	0	0	0	0	0	0	0	0	0	0	0	0	0	0	0	0	0	0	0	0	0	1	0	0	0	0
Meta-Protein 1784	BLAST_RL5_BACFR 50S ribosomal protein L5 OS=Bacteroides fragilis (strain YCH46) GN=rplE PE=3 SV=1_Q64NM0	Complete proteome;RNA-binding;Reference proteome;Ribonucleoprotein;Ribosomal protein;rRNA-binding;tRNA-binding;	;;;	;	;K02931;;	K02931;	UniRef50_Q5SHQ0	EMPTY	UniRef100_B2RLY0	Bacteria	Bacteroidales	unknown	Bacteroidia	Bacteroidales	Bacteroidales	Bacteroidales	Bacteroidales	Bacteroidales	41	0	0	0	0	0	0	0	0	0	0	0	0	0	0	0	0	0	0	2	0	6	14	9	0	0	0	0	0	0	0
Meta-Protein 5150	BLAST_Y2035_DEIRA UPF0548 protein DR_2035 OS=Deinococcus radiodurans (strain ATCC 13939 / DSM 20539 / JCM 16871 / LMG 4051 / NBRC 15346 / NCIMB 9279 / R1 / VKM B-1422) GN=DR_2035 PE=3 SV=1_Q9RST8	Complete proteome;Reference proteome;	;;;	;	;;;	;	UniRef50_Q9RST8	UniRef90_Q9RST8	UniRef100_Q9RST8	Bacteria	Deinococcus radiodurans R1	unknown	Deinococci	Deinococcales	Deinococcaceae	Deinococcus	Deinococcus radiodurans	Deinococcus radiodurans R1	1	0	0	0	0	0	0	0	0	0	0	0	0	0	0	0	0	0	0	0	0	0	0	0	0	0	0	0	0	0	0
Meta-Protein 28	BLAST_ADH2_GEOTN Long-chain-alcohol dehydrogenase 2 OS=Geobacillus thermodenitrificans (strain NG80-2) GN=adh2 PE=1 SV=1_A4ISB9	Complete proteome;Isomerase;NAD;Oxidoreductase;RNA-binding;Reference proteome;tRNA processing;	;1.1.1.-;1.1.1.192;5.4.99.25;;	1.1.1.-;1.1.1.192;5.4.99.25;	;;K07583;K19955;;	;K07583;K19955;	EMPTY	EMPTY	EMPTY	cellular organisms	cellular organisms	unknown	cellular organisms	cellular organisms	cellular organisms	cellular organisms	cellular organisms	cellular organisms	62	8	9	9	4	2	2	4	2	2	6	5	4	0	0	0	2	1	2	0	0	0	0	0	0	0	0	0	0	0	0
Meta-Protein 1865	IPYR_YEAST Inorganic pyrophosphatase OS=Saccharomyces cerevisiae (strain ATCC 204508 / S288c) GN=IPP1 PE=1 SV=4	3D-structure;Complete proteome;Cytoplasm;Direct protein sequencing;Hydrolase;Isopeptide bond;Magnesium;Metal-binding;Phosphoprotein;Reference proteome;Ubl conjugation;	;3.6.1.1;;	3.6.1.1;	;K01507;;	K01507;	UniRef50_P00817	UniRef90_P00817	UniRef100_P00817	Eukaryota	Fungi	unknown	Saccharomycetes	Saccharomycetales	Saccharomycetaceae	Saccharomyces	Saccharomyces cerevisiae	Saccharomyces cerevisiae S288c	1	0	0	0	0	0	0	0	0	0	0	0	0	0	0	0	0	0	0	0	1	0	0	0	0	0	0	0	0	0	0
Meta-Protein 967	Metagenome unknown		;;		;;					Uncategorized	Uncategorized	unknown	Uncategorized	Uncategorized	Uncategorized	Uncategorized	Uncategorized	Uncategorized	6	0	0	0	2	1	1	1	0	1	0	0	0	0	0	0	0	0	0	0	0	0	0	0	0	0	0	0	0	0	0
Meta-Protein 2189	BLAST_HEXA_PORGI Beta-hexosaminidase OS=Porphyromonas gingivalis (strain ATCC BAA-308 / W83) GN=nahA PE=3 SV=2_P49008	Cell outer membrane;Complete proteome;Glycosidase;Hydrolase;Lipoprotein;Membrane;Palmitate;Reference proteome;Signal;	;3.2.1.52;;	3.2.1.52;	;K12373;;	K12373;	UniRef50_P49008	UniRef90_P49008	UniRef100_P49008	Bacteria	Porphyromonas gingivalis W83	unknown	Bacteroidia	Bacteroidales	Porphyromonadaceae	Porphyromonas	Porphyromonas gingivalis	Porphyromonas gingivalis W83	1	0	0	0	0	0	0	0	0	0	0	0	0	0	0	0	0	0	0	0	0	0	0	1	0	0	0	0	0	0	0
Meta-Protein 3913	BLAST_SERA_METJA D-3-phosphoglycerate dehydrogenase OS=Methanocaldococcus jannaschii (strain ATCC 43067 / DSM 2661 / JAL-1 / JCM 10045 / NBRC 100440) GN=serA PE=3 SV=1_Q58424	Amino-acid biosynthesis;Complete proteome;NAD;Oxidoreductase;Reference proteome;Serine biosynthesis;	;1.1.1.95;;	1.1.1.95;	;K00058;;	K00058;	UniRef50_Q58424	UniRef90_Q58424	UniRef100_Q58424	Archaea	Methanocaldococcus jannaschii DSM 2661	unknown	Methanococci	Methanococcales	Methanocaldococcaceae	Methanocaldococcus	Methanocaldococcus jannaschii	Methanocaldococcus jannaschii DSM 2661	1	0	0	0	0	0	1	0	0	0	0	0	0	0	0	0	0	0	0	0	0	0	0	0	0	0	0	0	0	0	0
Meta-Protein 2115	BLAST_RLME_KLEP3 Ribosomal RNA large subunit methyltransferase E OS=Klebsiella pneumoniae (strain 342) GN=rlmE PE=3 SV=1_B5XSW2	Complete proteome;Cytoplasm;Methyltransferase;Reference proteome;S-adenosyl-L-methionine;Transferase;rRNA processing;	;2.1.1.166;;	2.1.1.166;	;K02427;;	K02427;	UniRef50_Q87WP7	UniRef90_A7MIM8	UniRef100_A6TEJ8	Bacteria	Enterobacteriaceae	unknown	Gammaproteobacteria	Enterobacteriales	Enterobacteriaceae	Enterobacteriaceae	Enterobacteriaceae	Enterobacteriaceae	1	0	0	0	0	0	0	0	0	0	0	0	0	0	0	0	0	0	0	0	0	0	1	0	0	0	0	0	0	0	0
Meta-Protein 4376	Metagenome Unknown		;;		;;					Uncategorized	Uncategorized	unknown	Uncategorized	Uncategorized	Uncategorized	Uncategorized	Uncategorized	Uncategorized	5	0	0	0	0	0	0	0	0	0	0	0	0	0	0	0	0	0	0	2	1	0	0	0	2	0	0	0	0	0	0
Meta-Protein 3704	Metagenome unknown		;;		;;					Uncategorized	Uncategorized	unknown	Uncategorized	Uncategorized	Uncategorized	Uncategorized	Uncategorized	Uncategorized	3	0	0	0	1	2	0	0	0	0	0	0	0	0	0	0	0	0	0	0	0	0	0	0	0	0	0	0	0	0	0
Meta-Protein 4166	AK3_ECOLI Lysine-sensitive aspartokinase 3 OS=Escherichia coli (strain K12) GN=lysC PE=1 SV=2	3D-structure;Allosteric enzyme;Amino-acid biosynthesis;ATP-binding;Complete proteome;Direct protein sequencing;Kinase;Lysine biosynthesis;Nucleotide-binding;Reference proteome;Transferase;	;2.7.2.4;;	2.7.2.4;	;K00928;;	K00928;	UniRef50_P08660	UniRef90_P08660	UniRef100_P08660	Bacteria	Escherichia coli K-12	unknown	Gammaproteobacteria	Enterobacteriales	Enterobacteriaceae	Escherichia	Escherichia coli	Escherichia coli K-12	8	0	0	0	0	0	0	0	0	0	8	0	0	0	0	0	0	0	0	0	0	0	0	0	0	0	0	0	0	0	0
Meta-Protein 1291	BLAST_PTGCB_BUCAP PTS system glucose-specific EIICB component OS=Buchnera aphidicola subsp. Schizaphis graminum (strain Sg) GN=ptsG PE=3 SV=1_Q8K9J0	Cell inner membrane;Cell membrane;Complete proteome;Kinase;Membrane;Phosphoprotein;Phosphotransferase system;Sugar transport;Transferase;Transmembrane;Transmembrane helix;Transport;	;2.7.1.199;;	2.7.1.199;	;K02778;K02779;;	K02778;K02779;	UniRef50_P57437	UniRef90_Q8K9J0	UniRef100_Q8K9J0	Bacteria	Buchnera aphidicola str. Sg (Schizaphis graminum)	unknown	Gammaproteobacteria	Enterobacteriales	Enterobacteriaceae	Buchnera	Buchnera aphidicola str. Sg (Schizaphis graminum)	Buchnera aphidicola (Schizaphis graminum)	1	0	0	0	0	0	0	0	0	0	0	1	0	0	0	0	0	0	0	0	0	0	0	0	0	0	0	0	0	0	0
Meta-Protein 1782	BLAST_GLNA3_DICDI Type-3 glutamine synthetase OS=Dictyostelium discoideum GN=glnA3 PE=1 SV=1_Q54WR9	ATP-binding;Complete proteome;Cytoplasm;Ligase;Magnesium;Metal-binding;Nucleotide-binding;Reference proteome;	;6.3.1.2;;	6.3.1.2;	;;K01915;;	;K01915;	EMPTY	EMPTY	EMPTY	cellular organisms	cellular organisms	unknown	cellular organisms	cellular organisms	cellular organisms	cellular organisms	cellular organisms	cellular organisms	12	0	0	0	0	0	0	0	0	0	0	0	0	0	0	0	0	0	0	1	2	0	1	0	4	0	0	0	1	0	3
Meta-Protein 1802	BLAST_PNP_SULAA Polyribonucleotide nucleotidyltransferase OS=Sulfurihydrogenibium azorense (strain Az-Fu1 / DSM 15241 / OCM 825) GN=pnp PE=3 SV=1_C1DTW6	3D-structure;4Fe-4S;Complete proteome;Cytoplasm;Direct protein sequencing;Iron;Iron-sulfur;Isoprene biosynthesis;Magnesium;Metal-binding;Nucleotidyltransferase;Oxidoreductase;Phosphoprotein;RNA-binding;Reference proteome;Repeat;Ribonucleoprotein;Ribosomal protein;Transferase;	;;1.17.7.4;2.7.7.8;;	;1.17.7.4;2.7.7.8;	;K00962;K02945;K03527;;	K00962;K02945;K03527;	UniRef50_Q8FPB7	UniRef90_C5BWR2	UniRef100_C5BWR2	Bacteria	Bacteria	unknown	Bacteria	Bacteria	Bacteria	Bacteria	Bacteria	Bacteria	38	0	0	0	0	0	0	0	0	0	0	0	0	0	0	0	0	0	0	0	3	1	0	0	0	8	10	5	2	0	1
Meta-Protein 1484	API3_SOLTU Aspartic protease inhibitor 3 (Fragment) OS=Solanum tuberosum PE=2 SV=1	3D-structure;Allergen;Aspartic protease inhibitor;Complete proteome;Direct protein sequencing;Disulfide bond;Glycoprotein;Protease inhibitor;Reference proteome;Serine protease inhibitor;Signal;Stress response;Vacuole;	;;;	;	;;;	;	UniRef50_P58514	UniRef90_Q41448	EMPTY	Eukaryota	Viridiplantae	unknown	Solanum tuberosum	Solanales	Solanaceae	Solanum	Solanum tuberosum	Solanum tuberosum	24	0	0	0	0	0	0	0	0	0	0	0	0	0	0	0	0	0	0	8	2	0	0	0	4	0	0	0	4	3	2
Meta-Protein 2425	BLAST_DHA_BACSU Alanine dehydrogenase OS=Bacillus subtilis (strain 168) GN=ald PE=1 SV=1_Q08352	Complete proteome;Cytoplasm;NAD;Nucleotide-binding;Oxidoreductase;Reference proteome;Sporulation;	;1.4.1.1;;	1.4.1.1;	;K00259;;	K00259;	UniRef50_Q6LX40	UniRef90_Q6LX40	UniRef100_Q6LX40	cellular organisms	cellular organisms	unknown	cellular organisms	cellular organisms	cellular organisms	cellular organisms	cellular organisms	cellular organisms	1	0	0	0	0	0	0	0	0	0	0	0	0	0	0	0	0	0	0	0	0	0	0	0	0	1	0	0	0	0	0
Meta-Protein 579	BLAST_SUCD2_ARCFU Succinate--CoA ligase [ADP-forming] subunit alpha 2 OS=Archaeoglobus fulgidus (strain ATCC 49558 / VC-16 / DSM 4304 / JCM 9628 / NBRC 100126) GN=sucD2 PE=3 SV=1_O28098	Complete proteome;Ligase;Nucleotide-binding;Reference proteome;Tricarboxylic acid cycle;	;6.2.1.5;;	6.2.1.5;	;K01902;;	K01902;	UniRef50_P53401	UniRef90_O28098	UniRef100_O28098	Archaea	Archaeoglobus fulgidus DSM 4304	unknown	Archaeoglobi	Archaeoglobales	Archaeoglobaceae	Archaeoglobus	Archaeoglobus fulgidus	Archaeoglobus fulgidus DSM 4304	72	3	4	3	9	8	4	13	9	7	4	1	1	0	0	0	2	3	1	0	0	0	0	0	0	0	0	0	0	0	0
Meta-Protein 1682	BLAST_CH60_CLOTH 60 kDa chaperonin OS=Clostridium thermocellum (strain ATCC 27405 / DSM 1237 / NBRC 103400 / NCIMB 10682 / NRRL B-4536 / VPI 7372) GN=groL PE=1 SV=3_P48212	ATP-binding;Chaperone;Complete proteome;Cytoplasm;Direct protein sequencing;Nucleotide-binding;Reference proteome;	;;;	;	;K04077;;	K04077;	UniRef50_Q9C667	UniRef90_P48212	UniRef100_P48212	Bacteria	Bacteria	unknown	Bacteria	Bacteria	Bacteria	Bacteria	Bacteria	Bacteria	5	0	0	0	0	0	0	0	0	0	0	0	0	0	0	0	0	0	0	1	0	0	0	0	0	0	2	0	1	0	1
Meta-Protein 2534	BLAST_DFX_PELCD Desulfoferrodoxin OS=Pelobacter carbinolicus (strain DSM 2380 / NBRC 103641 / GraBd1) GN=dfx PE=3 SV=1_Q3A221	3D-structure;Complete proteome;Detoxification;Direct protein sequencing;Electron transport;Iron;Metal-binding;Oxidoreductase;Reference proteome;Stress response;Transport;	;1.15.1.2;;	1.15.1.2;	;K05919;;	K05919;	UniRef50_P22076	EMPTY	EMPTY	Bacteria	Bacteria	unknown	Bacteria	Bacteria	Bacteria	Bacteria	Bacteria	Bacteria	1	0	0	0	0	0	0	0	0	0	0	0	0	0	0	0	0	0	0	0	0	0	0	0	0	0	0	0	0	0	0
Meta-Protein 3543	BLAST_FLO6_ORYSJ Protein FLOURY ENDOSPERM 6, chloroplastic OS=Oryza sativa subsp. japonica GN=FLO6 PE=1 SV=1_Q10F03	Chloroplast;Coiled coil;Complete proteome;Plastid;Reference proteome;Transit peptide;	;;;	;	;;;	;	UniRef50_Q10F03	UniRef90_Q10F03	UniRef100_Q10F03	Eukaryota	Viridiplantae	unknown	Liliopsida	Poales	Poaceae	Oryza	Oryza sativa	Oryza sativa Japonica Group	63	0	0	0	23	18	16	0	0	0	0	0	0	3	1	2	0	0	0	0	0	0	0	0	0	0	0	0	0	0	0
Meta-Protein 2711	BLAST_TAKP_RHOS4 Alpha-keto acid-binding periplasmic protein TakP OS=Rhodobacter sphaeroides (strain ATCC 17023 / 2.4.1 / NCIB 8253 / DSM 158) GN=takP PE=1 SV=1_Q3J1R2	3D-structure;Complete proteome;Metal-binding;Periplasm;Pyruvate;Reference proteome;Signal;Sodium;Transport;	;;;	;	;;;	;	EMPTY	EMPTY	EMPTY	Bacteria	Bacteria	unknown	Bacteria	Bacteria	Bacteria	Bacteria	Bacteria	Bacteria	1	0	0	0	0	0	0	0	0	0	0	0	0	0	0	0	0	0	0	0	0	0	0	0	0	0	0	0	0	0	0
Meta-Protein 2140	BLAST_PTAS_CLOTH Phosphate acetyltransferase OS=Clostridium thermocellum (strain ATCC 27405 / DSM 1237 / NBRC 103400 / NCIMB 10682 / NRRL B-4536 / VPI 7372) GN=pta PE=3 SV=1_O52593	Acyltransferase;Complete proteome;Cytoplasm;Reference proteome;Transferase;	;2.3.1.8;;	2.3.1.8;	;K00625;;	K00625;	UniRef50_O52593	UniRef90_O52593	UniRef100_O52593	Bacteria	Clostridia	unknown	Clostridia	Clostridia	Clostridia	Clostridia	Clostridia	Clostridia	1	0	0	0	0	0	0	0	0	0	0	0	0	0	0	0	0	0	0	0	0	0	1	0	0	0	0	0	0	0	0
Meta-Protein 1670	BLAST_ARFA_MYCBP Peptidoglycan-binding protein ArfA OS=Mycobacterium bovis (strain BCG / Pasteur 1173P2) GN=arfA PE=1 SV=1_A1KH31	3D-structure;Cell outer membrane;Cell wall;Complete proteome;Disulfide bond;Ion transport;Membrane;Metal-binding;Reference proteome;Secreted;Transmembrane;Transmembrane helix;Transport;Zinc;	;;;	;	;K16191;;	K16191;	UniRef50_P65594	UniRef90_P65594	UniRef100_P65594	Bacteria	Mycobacterium tuberculosis complex	unknown	Actinobacteria	Actinomycetales	Mycobacteriaceae	Mycobacterium	Mycobacterium tuberculosis complex	Mycobacterium tuberculosis complex	7	0	0	0	0	0	0	0	0	0	0	0	0	0	0	0	0	0	0	2	3	0	0	0	0	0	0	0	0	1	1
Meta-Protein 4780	Metagenome Unknown		;;		;;					Uncategorized	Uncategorized	unknown	Uncategorized	Uncategorized	Uncategorized	Uncategorized	Uncategorized	Uncategorized	2	0	0	0	0	0	0	0	0	0	0	0	0	0	0	0	0	0	0	0	0	0	0	0	1	0	0	0	0	0	1
Meta-Protein 1100	BLAST_EUTB_ECOLI Ethanolamine ammonia-lyase heavy chain OS=Escherichia coli (strain K12) GN=eutB PE=1 SV=1_P0AEJ6	3D-structure;Cobalt;Complete proteome;Direct protein sequencing;Lyase;Reference proteome;	;4.3.1.7;;	4.3.1.7;	;K03735;;	K03735;	UniRef50_P19264	UniRef90_P19264	UniRef100_P0AEJ7	Bacteria	Escherichia coli	unknown	Gammaproteobacteria	Enterobacteriales	Enterobacteriaceae	Escherichia	Escherichia coli	Escherichia coli	2	0	0	0	0	0	2	0	0	0	0	0	0	0	0	0	0	0	0	0	0	0	0	0	0	0	0	0	0	0	0
Meta-Protein 560	BLAST_AL4A1_DICDI Delta-1-pyrroline-5-carboxylate dehydrogenase, mitochondrial OS=Dictyostelium discoideum GN=DDB_G0283293 PE=3 SV=1_Q54RA2	Complete proteome;Mitochondrion;NAD;Oxidoreductase;Proline metabolism;Reference proteome;Transit peptide;	;1.2.1.88;;	1.2.1.88;	;K00294;;	K00294;	UniRef50_Q7SY23	UniRef90_Q54RA2	UniRef100_Q54RA2	Eukaryota	Dictyostelium discoideum	unknown	Dictyostelium discoideum	Dictyosteliida	Dictyostelium discoideum	Dictyostelium	Dictyostelium discoideum	Dictyostelium discoideum	82	1	1	1	14	17	16	8	5	6	1	0	1	2	2	2	2	3	0	0	0	0	0	0	0	0	0	0	0	0	0
Meta-Protein 463	BLAST_OMPA_THEMA Outer membrane protein alpha OS=Thermotoga maritima (strain ATCC 43589 / MSB8 / DSM 3109 / JCM 10099) GN=omp-alpha PE=1 SV=2_Q01969	Cell outer membrane;Coiled coil;Complete proteome;Direct protein sequencing;Membrane;Reference proteome;Repeat;Signal;Transmembrane;Transmembrane helix;	;;;	;	;;;	;	UniRef50_Q01969	UniRef90_Q01969	UniRef100_Q01969	Bacteria	Thermotoga maritima MSB8	unknown	Thermotogae	Thermotogales	Thermotogaceae	Thermotoga	Thermotoga maritima	Thermotoga maritima MSB8	1	1	0	0	0	0	0	0	0	0	0	0	0	0	0	0	0	0	0	0	0	0	0	0	0	0	0	0	0	0	0
Meta-Protein 108	BLAST_SCPA_ECOLI Methylmalonyl-CoA mutase OS=Escherichia coli (strain K12) GN=scpA PE=1 SV=2_P27253	Cobalamin;Cobalt;Complete proteome;Isomerase;Metal-binding;Plasmid;Reference proteome;	;5.4.99.2;;	5.4.99.2;	;K01847;;	K01847;	UniRef50_P22033	UniRef90_P27253	UniRef100_P27253	Bacteria	Proteobacteria	unknown	Proteobacteria	Proteobacteria	Proteobacteria	Proteobacteria	Proteobacteria	Proteobacteria	10	3	3	0	2	1	0	1	0	0	0	0	0	0	0	0	0	0	0	0	0	0	0	0	0	0	0	0	0	0	0
Meta-Protein 2211	BLAST_QUEA_BACFN S-adenosylmethionine:tRNA ribosyltransferase-isomerase OS=Bacteroides fragilis (strain ATCC 25285 / DSM 2151 / JCM 11019 / NCTC 9343) GN=queA PE=3 SV=1_Q5LJ28	Complete proteome;Cytoplasm;Queuosine biosynthesis;Reference proteome;S-adenosyl-L-methionine;Transferase;	;2.4.99.17;;	2.4.99.17;	;K07568;;	K07568;	UniRef50_Q5LJ28	UniRef90_Q5LJ28	UniRef100_Q5LJ28	Bacteria	Bacteroides	unknown	Bacteroidia	Bacteroidales	Bacteroidaceae	Bacteroides	Bacteroides	Bacteroides	2	0	0	0	0	0	0	0	0	0	0	0	0	0	0	0	0	0	0	0	0	0	0	0	2	0	0	0	0	0	0
Meta-Protein 1183	BLAST_HCP_THEMA Hydroxylamine reductase OS=Thermotoga maritima (strain ATCC 43589 / MSB8 / DSM 3109 / JCM 10099) GN=hcp PE=3 SV=1_Q9X0Q4	4Fe-4S;Complete proteome;Cytoplasm;Iron;Iron-sulfur;Metal-binding;Oxidoreductase;Reference proteome;	;1.7.99.1;;	1.7.99.1;	;;K05601;;	;K05601;	UniRef50_O27502	UniRef90_O27502	UniRef100_O27502	cellular organisms	cellular organisms	unknown	cellular organisms	cellular organisms	cellular organisms	cellular organisms	cellular organisms	cellular organisms	1	0	0	0	0	0	0	0	0	0	0	0	0	0	1	0	0	0	0	0	0	0	0	0	0	0	0	0	0	0	0
Meta-Protein 1403	BLAST_GLGB_DEBHA 1,4-alpha-glucan-branching enzyme OS=Debaryomyces hansenii (strain ATCC 36239 / CBS 767 / JCM 1990 / NBRC 0083 / IGC 2968) GN=GLC3 PE=3 SV=1_Q6BXN1	Calcium;Carbohydrate metabolism;Complete proteome;Glycogen biosynthesis;Glycosidase;Glycosyltransferase;Hydrolase;Metal-binding;Plasmid;Reference proteome;Signal;Transferase;	;2.4.1.18;3.2.1.1;;	2.4.1.18;3.2.1.1;	;K00700;K01176;;	K00700;K01176;	UniRef50_Q9LZS3	UniRef90_Q6BXN1	UniRef100_Q6BXN1	cellular organisms	cellular organisms	unknown	cellular organisms	cellular organisms	cellular organisms	cellular organisms	cellular organisms	cellular organisms	5	0	0	0	0	0	0	0	0	0	0	0	0	0	0	0	0	0	0	3	0	0	0	0	0	1	0	0	0	0	0
Meta-Protein 3338	BLAST_GSIB_PECAS Glutathione-binding protein GsiB OS=Pectobacterium atrosepticum (strain SCRI 1043 / ATCC BAA-672) GN=gsiB PE=3 SV=1_Q6D3B0	Complete proteome;Periplasm;Reference proteome;Signal;Transport;	;;;	;	;K13889;;	K13889;	UniRef50_P75797	UniRef90_Q6D3B0	UniRef100_Q6D3B0	Bacteria	Pectobacterium atrosepticum SCRI1043	unknown	Gammaproteobacteria	Enterobacteriales	Enterobacteriaceae	Pectobacterium	Pectobacterium atrosepticum	Pectobacterium atrosepticum SCRI1043	14	0	1	0	4	3	2	1	2	1	0	0	0	0	0	0	0	0	0	0	0	0	0	0	0	0	0	0	0	0	0
Meta-Protein 124	BLAST_PCKA_PORG3 Phosphoenolpyruvate carboxykinase (ATP) OS=Porphyromonas gingivalis (strain ATCC 33277 / DSM 20709 / CIP 103683 / JCM 12257 / NCTC 11834 / 2561) GN=pckA PE=3 SV=1_B2RHV8	3D-structure;ATP-binding;Acetylation;Allosteric enzyme;Calcium;Complete proteome;Cytoplasm;Decarboxylase;Direct protein sequencing;Gluconeogenesis;Lyase;Magnesium;Manganese;Metal-binding;Nucleotide-binding;Reference proteome;	;4.1.1.49;;	4.1.1.49;	;;K01610;;	;K01610;	UniRef50_O09460	EMPTY	UniRef100_A6Q102	Bacteria	Bacteria	unknown	Bacteria	Bacteria	Bacteria	Bacteria	Bacteria	Bacteria	648	1	0	0	0	0	0	0	0	0	0	0	0	0	0	0	0	0	0	52	55	23	60	45	70	61	41	61	23	12	13
Meta-Protein 1094	BLAST_RS4_LACP7 30S ribosomal protein S4 OS=Lachnoclostridium phytofermentans (strain ATCC 700394 / DSM 18823 / ISDg) GN=rpsD PE=3 SV=1_A9KJG7	Complete proteome;RNA-binding;Reference proteome;Ribonucleoprotein;Ribosomal protein;rRNA-binding;	;;;	;	;K02986;;	K02986;	UniRef50_Q9X1I3	UniRef90_A9KJG7	UniRef100_A9KJG7	Bacteria	Clostridium phytofermentans ISDg	unknown	Clostridia	Clostridiales	Clostridiaceae	Clostridium	Clostridium phytofermentans	Clostridium phytofermentans ISDg	1	0	0	0	0	0	1	0	0	0	0	0	0	0	0	0	0	0	0	0	0	0	0	0	0	0	0	0	0	0	0
Meta-Protein 563	Metagenome unknown		;;		;;					Uncategorized	Uncategorized	unknown	Uncategorized	Uncategorized	Uncategorized	Uncategorized	Uncategorized	Uncategorized	65	3	2	3	6	6	10	13	12	10	0	0	0	0	0	0	0	0	0	0	0	0	0	0	0	0	0	0	0	0	0
Meta-Protein 1623	BLAST_EFTS_BACFR Elongation factor Ts OS=Bacteroides fragilis (strain YCH46) GN=tsf PE=3 SV=1_Q64P30	Complete proteome;Cytoplasm;Elongation factor;Protein biosynthesis;Reference proteome;	;;;	;	;K02357;;	K02357;	UniRef50_Q8A0Z3	UniRef90_Q5L8W8	UniRef100_Q5L8W8	Bacteria	Bacteroidales	unknown	Bacteroidia	Bacteroidales	Bacteroidales	Bacteroidales	Bacteroidales	Bacteroidales	46	0	0	0	0	0	0	0	0	0	0	0	0	0	0	0	0	0	0	5	3	6	11	8	4	1	1	3	2	0	0
Meta-Protein 2805	BLAST_ODBB_THET8 2-oxoisovalerate dehydrogenase subunit beta OS=Thermus thermophilus (strain HB8 / ATCC 27634 / DSM 579) GN=TTHA0230 PE=1 SV=1_Q5SLR3	3D-structure;Complete proteome;Oxidoreductase;Reference proteome;Thiamine pyrophosphate;	;1.2.4.4;;	1.2.4.4;	;K00167;;	K00167;	UniRef50_Q5SLR3	UniRef90_Q5SLR3	UniRef100_Q5SLR3	Bacteria	Thermus thermophilus HB8	unknown	Deinococci	Thermales	Thermaceae	Thermus	Thermus thermophilus	Thermus thermophilus HB8	5	2	0	1	0	0	0	1	0	0	1	0	0	0	0	0	0	0	0	0	0	0	0	0	0	0	0	0	0	0	0
Meta-Protein 2352	RL25_BACV8 50S ribosomal protein L25 OS=Bacteroides vulgatus (strain ATCC 8482 / DSM 1447 / JCM 5826 / NBRC 14291 / NCTC 11154) GN=rplY PE=3 SV=1	Complete proteome;RNA-binding;Reference proteome;Ribonucleoprotein;Ribosomal protein;rRNA-binding;	;;;	;	;K02897;;	K02897;	UniRef50_A6L6X0	UniRef90_A6L6X0	UniRef100_A6L6X0	Bacteria	Bacteroides	unknown	Bacteroidia	Bacteroidales	Bacteroidaceae	Bacteroides	Bacteroides	Bacteroides	23	0	0	0	0	0	0	0	0	0	0	0	0	0	0	0	0	0	0	0	0	0	0	0	0	6	7	6	0	0	0
Meta-Protein 197	BLAST_TKT_GEOSE Transketolase OS=Geobacillus stearothermophilus GN=tkt PE=1 SV=1_A0A0I9QGZ2	Calcium;Complete proteome;DNA recombination;Magnesium;Metal-binding;Reference proteome;Thiamine pyrophosphate;Transferase;	;2.2.1.1;;	2.2.1.1;	;;K00615;;	;K00615;	UniRef50_P22976	UniRef90_P22976	UniRef100_P22976	Bacteria	Bacilli	unknown	Bacilli	Bacilli	Bacilli	Bacilli	Bacilli	Bacilli	4	1	2	1	0	0	0	0	0	0	0	0	0	0	0	0	0	0	0	0	0	0	0	0	0	0	0	0	0	0	0
Meta-Protein 4890	BLAST_EFTU1_PELCD Elongation factor Tu 1 OS=Pelobacter carbinolicus (strain DSM 2380 / NBRC 103641 / GraBd1) GN=tuf1 PE=3 SV=1_Q3A6R2	Complete proteome;Cytoplasm;Elongation factor;GTP-binding;Nucleotide-binding;Protein biosynthesis;Reference proteome;	;;;	;	;K02358;;	K02358;	UniRef50_Q5SHN6	UniRef90_Q3A6R2	UniRef100_Q3A6R2	Bacteria	Pelobacter carbinolicus DSM 2380	unknown	Deltaproteobacteria	Desulfuromonadales	Pelobacteraceae	Pelobacter	Pelobacter carbinolicus	Pelobacter carbinolicus DSM 2380	1	0	0	0	0	0	0	0	0	0	0	0	0	0	0	0	0	0	0	0	0	0	0	0	0	0	1	0	0	0	0
Meta-Protein 1888	BLAST_SYG_LACP7 Glycine--tRNA ligase OS=Lachnoclostridium phytofermentans (strain ATCC 700394 / DSM 18823 / ISDg) GN=glyQS PE=3 SV=1_A9KJ36	ATP-binding;Aminoacyl-tRNA synthetase;Complete proteome;Cytoplasm;Ligase;Nucleotide-binding;Protein biosynthesis;Reference proteome;	;6.1.1.14;;	6.1.1.14;	;K01880;;	K01880;	EMPTY	EMPTY	EMPTY	Bacteria	Firmicutes	unknown	Firmicutes	Firmicutes	Firmicutes	Firmicutes	Firmicutes	Firmicutes	6	0	0	0	0	0	0	0	0	0	0	0	0	0	0	0	0	0	0	0	0	1	0	0	0	3	0	1	1	0	0
Meta-Protein 4002	BLAST_YBDN_BACSU Uncharacterized protein YbdN OS=Bacillus subtilis (strain 168) GN=ybdN PE=3 SV=1_O31436	Complete proteome;Reference proteome;Signal;	;;;	;	;;;	;	UniRef50_O31436	UniRef90_O31436	UniRef100_O31436	Bacteria	Bacillus subtilis subsp. subtilis str. 168	unknown	Bacilli	Bacillales	Bacillaceae	Bacillus	Bacillus subtilis subsp. subtilis str. 168	Bacillus subtilis subsp. subtilis	3	0	0	0	0	0	0	3	0	0	0	0	0	0	0	0	0	0	0	0	0	0	0	0	0	0	0	0	0	0	0
Meta-Protein 390	BLAST_ISP_PAEPO Intracellular serine protease OS=Paenibacillus polymyxa GN=isp PE=1 SV=1_P29139	Direct protein sequencing;Hydrolase;Protease;Serine protease;	;3.4.21.-;;	3.4.21.-;	;;;	;	UniRef50_P29139	UniRef90_P29139	UniRef100_P29139	Bacteria	Paenibacillus polymyxa	unknown	Bacilli	Bacillales	Paenibacillaceae	Paenibacillus	Paenibacillus polymyxa	Paenibacillus polymyxa	140	12	12	11	11	12	8	8	13	10	15	6	9	3	0	3	2	3	2	0	0	0	0	0	0	0	0	0	0	0	0
Meta-Protein 3789	BLAST_MALE_THELN Trehalose/maltose-binding protein MalE OS=Thermococcus litoralis (strain ATCC 51850 / DSM 5473 / JCM 8560 / NS-C) GN=malE PE=1 SV=2_Q7LYW7	3D-structure;Cell membrane;Complete proteome;Glycoprotein;Lipoprotein;Membrane;Signal;Sugar transport;Transport;	;;;	;	;K02027;;	K02027;	UniRef50_Q7LYW7	UniRef90_Q7LYW7	UniRef100_Q7LYW7	Archaea	Thermococcus litoralis DSM 5473	unknown	Thermococci	Thermococcales	Thermococcaceae	Thermococcus	Thermococcus litoralis	Thermococcus litoralis DSM 5473	3	0	0	0	1	0	1	0	0	0	0	0	0	0	0	0	1	0	0	0	0	0	0	0	0	0	0	0	0	0	0
Meta-Protein 3474	BLAST_YCR2_ESCVU Uncharacterized family 31 glucosidase ORF2 (Fragment) OS=Escherichia vulneris PE=3 SV=1_Q01336	Glycosidase;Hydrolase;	;3.2.1.-;;	3.2.1.-;	;;;	;	UniRef50_Q01336	UniRef90_Q01336	UniRef100_Q01336	Bacteria	Escherichia vulneris	unknown	Gammaproteobacteria	Enterobacteriales	Enterobacteriaceae	Escherichia	Escherichia vulneris	Escherichia vulneris	1	0	0	1	0	0	0	0	0	0	0	0	0	0	0	0	0	0	0	0	0	0	0	0	0	0	0	0	0	0	0
Meta-Protein 4189	BLAST_IORB_METTH Indolepyruvate oxidoreductase subunit IorB OS=Methanothermobacter thermautotrophicus (strain ATCC 29096 / DSM 1053 / JCM 10044 / NBRC 100330 / Delta H) GN=iorB PE=3 SV=1_O27881	Complete proteome;Oxidoreductase;Reference proteome;	;1.2.7.8;;	1.2.7.8;	;K00180;;	K00180;	UniRef50_P80911	UniRef90_O27881	UniRef100_O27881	Archaea	Methanothermobacter thermautotrophicus str. Delta H	unknown	Methanobacteria	Methanobacteriales	Methanobacteriaceae	Methanothermobacter	Methanothermobacter thermautotrophicus	Methanothermobacter thermautotrophicus str. Delta H	2	0	0	0	0	0	0	0	0	0	1	0	1	0	0	0	0	0	0	0	0	0	0	0	0	0	0	0	0	0	0
Meta-Protein 675	BLAST_TPL_CLOSW Tyrosine phenol-lyase OS=Clostridium saccharolyticum (strain ATCC 35040 / DSM 2544 / NRCC 2533 / WM1) GN=tpl PE=3 SV=1_D9R201	Complete proteome;Lyase;Pyridoxal phosphate;Reference proteome;	;4.1.99.2;;	4.1.99.2;	;K01668;;	K01668;	UniRef50_P31011	EMPTY	EMPTY	Bacteria	Bacteria	unknown	Bacteria	Bacteria	Bacteria	Bacteria	Bacteria	Bacteria	10	2	2	2	0	0	0	1	0	0	1	1	1	0	0	0	0	0	0	0	0	0	0	0	0	0	0	0	0	0	0
Meta-Protein 1881	BLAST_PYR1_CAEEL CAD protein OS=Caenorhabditis elegans GN=pyr-1 PE=1 SV=2_Q18990	ATP-binding;Complete proteome;Glutamine amidotransferase;Hydrolase;Ligase;Magnesium;Manganese;Metal-binding;Multifunctional enzyme;Nucleotide-binding;Phosphoprotein;Pyrimidine biosynthesis;Reference proteome;Repeat;Transferase;Zinc;	;2.1.3.2;3.5.2.3;6.3.5.5;;	2.1.3.2;3.5.2.3;6.3.5.5;	;K11540;K11541;;	K11540;K11541;	EMPTY	EMPTY	EMPTY	Eukaryota	Opisthokonta	unknown	Opisthokonta	Opisthokonta	Opisthokonta	Opisthokonta	Opisthokonta	Opisthokonta	1	0	0	0	0	0	0	0	0	0	0	0	0	0	0	0	0	0	0	0	0	1	0	0	0	0	0	0	0	0	0
Meta-Protein 4828	BLAST_RS1_MYCS2 30S ribosomal protein S1 OS=Mycobacterium smegmatis (strain ATCC 700084 / mc(2)155) GN=rpsA PE=1 SV=1_A0QYY6	3D-structure;Complete proteome;Direct protein sequencing;Nucleotidyltransferase;RNA-binding;Reference proteome;Ribonucleoprotein;Ribosomal protein;Transferase;	;;;	;	;K02945;;	K02945;	UniRef50_A0QYY6	UniRef90_A0QYY6	UniRef100_A0QYY6	Bacteria	Mycobacterium smegmatis str. MC2 155	unknown	Actinobacteria	Actinomycetales	Mycobacteriaceae	Mycobacterium	Mycobacterium smegmatis	Mycobacterium smegmatis str. MC2 155	1	0	0	0	0	0	0	0	0	0	0	0	0	0	0	0	0	0	0	0	0	0	0	0	0	1	0	0	0	0	0
Meta-Protein 1060	BLAST_ASSY_PYRFU Argininosuccinate synthase OS=Pyrococcus furiosus (strain ATCC 43587 / DSM 3638 / JCM 8422 / Vc1) GN=argG PE=3 SV=1_Q8U484	ATP-binding;Amino-acid biosynthesis;Arginine biosynthesis;Complete proteome;Cytoplasm;Ligase;Nucleotide-binding;Reference proteome;	;6.3.4.5;;	6.3.4.5;	;K01940;;	K01940;	UniRef50_Q8U484	UniRef90_Q8U484	UniRef100_Q8U484	Archaea	Pyrococcus furiosus DSM 3638	unknown	Thermococci	Thermococcales	Thermococcaceae	Pyrococcus	Pyrococcus furiosus	Pyrococcus furiosus DSM 3638	1	0	0	0	0	1	0	0	0	0	0	0	0	0	0	0	0	0	0	0	0	0	0	0	0	0	0	0	0	0	0
Meta-Protein 2060	BLAST_RBSK_LEIMA Ribokinase OS=Leishmania major GN=LMJF_27_0420 PE=1 SV=1_E9AD19	ATP-binding;Carbohydrate metabolism;Complete proteome;Cytoplasm;Kinase;Magnesium;Metal-binding;Nucleotide-binding;Nucleus;Potassium;Reference proteome;Transferase;	;2.7.1.15;;	2.7.1.15;	;K00852;;	K00852;	UniRef50_E9AD19	UniRef90_E9AD19	UniRef100_E9AD19	Eukaryota	Leishmania major	unknown	Leishmania major	Kinetoplastida	Trypanosomatidae	Leishmania	Leishmania major	Leishmania major	1	0	0	0	0	0	0	0	0	0	0	0	0	0	0	0	0	0	0	0	0	0	1	0	0	0	0	0	0	0	0
Meta-Protein 1684	BLAST_RL13_METRJ 50S ribosomal protein L13 OS=Methylobacterium radiotolerans (strain ATCC 27329 / DSM 1819 / JCM 2831) GN=rplM PE=3 SV=1_B1M200	Complete proteome;Reference proteome;Ribonucleoprotein;Ribosomal protein;	;;;	;	;K02871;;	K02871;	UniRef50_A0QSP8	UniRef90_Q1LRD0	UniRef100_Q2GCT8	Bacteria	Bacteria	unknown	Bacteria	Bacteria	Bacteria	Bacteria	Bacteria	Bacteria	29	0	0	0	0	0	0	0	0	0	0	0	0	0	0	0	0	0	0	1	4	1	5	3	4	0	0	1	2	1	2
Meta-Protein 4761	BLAST_IF3_PARD8 Translation initiation factor IF-3 OS=Parabacteroides distasonis (strain ATCC 8503 / DSM 20701 / CIP 104284 / JCM 5825 / NCTC 11152) GN=infC PE=3 SV=1_A6L9S3	Complete proteome;Cytoplasm;Initiation factor;Protein biosynthesis;Reference proteome;	;;;	;	;K02520;;	K02520;	UniRef50_A6L9S3	UniRef90_A6L9S3	UniRef100_A6L9S3	Bacteria	Parabacteroides distasonis ATCC 8503	unknown	Bacteroidia	Bacteroidales	Porphyromonadaceae	Parabacteroides	Parabacteroides distasonis	Parabacteroides distasonis ATCC 8503	1	0	0	0	0	0	0	0	0	0	0	0	0	0	0	0	0	0	0	0	0	0	0	0	1	0	0	0	0	0	0
Meta-Protein 4881	Metagenome Unknown		;;		;;					Uncategorized	Uncategorized	unknown	Uncategorized	Uncategorized	Uncategorized	Uncategorized	Uncategorized	Uncategorized	2	0	0	0	0	0	0	0	0	0	0	0	0	0	0	0	0	0	0	0	0	0	0	0	0	2	0	0	0	0	0
Meta-Protein 2521	BLAST_RS15_LACP7 30S ribosomal protein S15 OS=Lachnoclostridium phytofermentans (strain ATCC 700394 / DSM 18823 / ISDg) GN=rpsO PE=3 SV=1_A9KNL0	Complete proteome;RNA-binding;Reference proteome;Ribonucleoprotein;Ribosomal protein;rRNA-binding;	;;;	;	;K02956;;	K02956;	UniRef50_Q6NCN7	UniRef90_A9KNL0	UniRef100_A9KNL0	Bacteria	Clostridium phytofermentans ISDg	unknown	Clostridia	Clostridiales	Clostridiaceae	Clostridium	Clostridium phytofermentans	Clostridium phytofermentans ISDg	1	0	0	0	0	0	0	0	0	0	0	0	0	0	0	0	0	0	0	0	0	0	0	0	0	0	0	0	1	0	0
Meta-Protein 292	CAH_METTE Carbonic anhydrase OS=Methanosarcina thermophila PE=1 SV=1	3D-structure;Direct protein sequencing;Lyase;Metal-binding;Signal;Zinc;	;4.2.1.1;;	4.2.1.1;	;;;	;	UniRef50_P40881	UniRef90_P40881	UniRef100_P40881	Archaea	Methanosarcina thermophila	unknown	Methanomicrobia	Methanosarcinales	Methanosarcinaceae	Methanosarcina	Methanosarcina thermophila	Methanosarcina thermophila	2	2	0	0	0	0	0	0	0	0	0	0	0	0	0	0	0	0	0	0	0	0	0	0	0	0	0	0	0	0	0
Meta-Protein 2052	BLAST_IF2_BACFN Translation initiation factor IF-2 OS=Bacteroides fragilis (strain ATCC 25285 / DSM 2151 / JCM 11019 / NCTC 9343) GN=infB PE=3 SV=1_Q5LIN1	Complete proteome;Cytoplasm;GTP-binding;Initiation factor;Nucleotide-binding;Protein biosynthesis;Reference proteome;	;;;	;	;K02519;;	K02519;	EMPTY	UniRef90_A6L030	UniRef100_A6L030	Bacteria	Bacteria	unknown	Bacteria	Bacteria	Bacteria	Bacteria	Bacteria	Bacteria	1	0	0	0	0	0	0	0	0	0	0	0	0	0	0	0	0	0	0	0	0	0	1	0	0	0	0	0	0	0	0
Meta-Protein 4992	Metagenome Unknown		;;		;;					Uncategorized	Uncategorized	unknown	Uncategorized	Uncategorized	Uncategorized	Uncategorized	Uncategorized	Uncategorized	1	0	0	0	0	0	0	0	0	0	0	0	0	0	0	0	0	0	0	0	0	0	0	0	0	0	0	0	0	0	0
Meta-Protein 1313	ANX12_COLLI Annexin A1 isoform p37 OS=Columba livia GN=CP37 PE=1 SV=1	3D-structure;Acetylation;Adaptive immunity;Annexin;Calcium;Calcium/phospholipid-binding;Cell membrane;Cell projection;Cilium;Complete proteome;Cytoplasm;Cytoplasmic vesicle;Direct protein sequencing;Disulfide bond;Endosome;Immunity;Inflammatory response;Innate immunity;Isopeptide bond;Membrane;Metal-binding;Nucleus;Pharmaceutical;Phospholipase A2 inhibitor;Phosphoprotein;Reference proteome;Repeat…	;;;	;	;K17091;;	K17091;	UniRef50_P04083	UniRef90_P04083	UniRef100_A5A6M2	Eukaryota	Metazoa	unknown	Amniota	Amniota	Amniota	Amniota	Amniota	Amniota	1	0	0	0	0	0	0	0	0	0	0	0	1	0	0	0	0	0	0	0	0	0	0	0	0	0	0	0	0	0	0
Meta-Protein 4620	Metagenome Unknown		;;		;;					Uncategorized	Uncategorized	unknown	Uncategorized	Uncategorized	Uncategorized	Uncategorized	Uncategorized	Uncategorized	2	0	0	0	0	0	0	0	0	0	0	0	0	0	0	0	0	0	0	0	0	0	2	0	0	0	0	0	0	0	0
Meta-Protein 892	BLAST_YP15_STAAU DegV domain-containing 15.5 kDa protein OS=Staphylococcus aureus PE=3 SV=1_P13977	Lipid-binding;Plasmid;	;;;	;	;;;	;	UniRef50_P13977	UniRef90_P13977	UniRef100_P13977	Bacteria	Staphylococcus aureus	unknown	Bacilli	Bacillales	Staphylococcaceae	Staphylococcus	Staphylococcus aureus	Staphylococcus aureus	2	0	0	1	0	0	0	0	0	0	0	1	0	0	0	0	0	0	0	0	0	0	0	0	0	0	0	0	0	0	0
Meta-Protein 1452	BLAST_IF5A1_YEAST Eukaryotic translation initiation factor 5A-1 OS=Saccharomyces cerevisiae (strain ATCC 204508 / S288c) GN=HYP2 PE=1 SV=3_P23301	3D-structure;Acetylation;Complete proteome;Cytoplasm;Direct protein sequencing;Elongation factor;Hypusine;Isopeptide bond;Phosphoprotein;Protein biosynthesis;RNA-binding;Reference proteome;Ubl conjugation;	;;;	;	;K03263;;	K03263;	UniRef50_P23301	UniRef90_P23301	UniRef100_P23301	Eukaryota	Fungi	unknown	Saccharomycetes	Saccharomycetales	Saccharomycetaceae	Saccharomyces	Saccharomyces cerevisiae	Saccharomyces cerevisiae S288c	1	0	0	0	0	0	0	0	0	0	0	0	0	0	0	0	0	0	0	1	0	0	0	0	0	0	0	0	0	0	0
Meta-Protein 2326	BLAST_IUTA_KLEPN Ferric aerobactin receptor OS=Klebsiella pneumoniae GN=iutA PE=1 SV=1_Q6U607	3D-structure;Carbohydrate metabolism;Cell outer membrane;Complete proteome;Ion transport;Iron;Iron transport;Membrane;Plasmid;Receptor;Reference proteome;Signal;TonB box;Transmembrane;Transmembrane beta strand;Transport;	;;;	;	;;K02014;K19611;K21573;;	;K02014;K19611;K21573;	UniRef50_P14542	UniRef90_P14542	UniRef100_Q6U607	Bacteria	Bacteria	unknown	Bacteria	Bacteria	Bacteria	Bacteria	Bacteria	Bacteria	1	0	0	0	0	0	0	0	0	0	0	0	0	0	0	0	0	0	0	0	0	0	0	0	0	1	0	0	0	0	0
Meta-Protein 2607	BLAST_BKTB_CUPNH Beta-ketothiolase BktB OS=Cupriavidus necator (strain ATCC 17699 / H16 / DSM 428 / Stanier 337) GN=bktB PE=1 SV=1_Q0KBP1	3D-structure;Acyltransferase;Complete proteome;Direct protein sequencing;Reference proteome;Transferase;	;2.3.1.16;2.3.1.9;;	2.3.1.16;2.3.1.9;	;K00626;;	K00626;	UniRef50_Q0KBP1	UniRef90_Q0KBP1	UniRef100_Q0KBP1	Bacteria	Ralstonia eutropha H16	unknown	Betaproteobacteria	Burkholderiales	Burkholderiaceae	Cupriavidus	Cupriavidus necator	Ralstonia eutropha H16	1	0	0	0	0	0	0	0	0	0	0	0	0	0	0	0	0	0	0	0	0	0	0	0	0	0	0	0	0	0	0
Meta-Protein 3788	Metagenome unknown		;;		;;					Uncategorized	Uncategorized	unknown	Uncategorized	Uncategorized	Uncategorized	Uncategorized	Uncategorized	Uncategorized	3	0	0	0	1	0	2	0	0	0	0	0	0	0	0	0	0	0	0	0	0	0	0	0	0	0	0	0	0	0	0
Meta-Protein 273	BLAST_AGLE_RHIME Alpha-glucosides-binding periplasmic protein AglE OS=Rhizobium meliloti (strain 1021) GN=aglE PE=3 SV=2_Q9Z3R5	Complete proteome;Periplasm;Reference proteome;Signal;Sugar transport;Transport;	;;;	;	;K10232;;	K10232;	UniRef50_Q9Z3R5	UniRef90_Q9Z3R5	UniRef100_Q9Z3R5	Bacteria	Sinorhizobium meliloti 1021	unknown	Alphaproteobacteria	Rhizobiales	Rhizobiaceae	Sinorhizobium	Sinorhizobium meliloti	Sinorhizobium meliloti 1021	157	18	20	7	18	11	6	6	1	1	26	14	14	0	0	0	7	4	4	0	0	0	0	0	0	0	0	0	0	0	0
Meta-Protein 5179	Metagenome unknown		;;		;;					Uncategorized	Uncategorized	unknown	Uncategorized	Uncategorized	Uncategorized	Uncategorized	Uncategorized	Uncategorized	2	0	0	0	0	0	0	0	0	0	0	0	0	0	0	0	0	0	0	0	0	0	0	0	0	0	0	0	0	0	0
Meta-Protein 1993	BLAST_IRGA_VIBCH Iron-regulated outer membrane virulence protein OS=Vibrio cholerae serotype O1 (strain ATCC 39315 / El Tor Inaba N16961) GN=irgA PE=3 SV=1_P0C6R0	Carbohydrate metabolism;Cell outer membrane;Complete proteome;Ion transport;Iron;Iron transport;Membrane;Receptor;Reference proteome;Signal;TonB box;Transmembrane;Transmembrane beta strand;Transport;Virulence;	;;;	;	;K16089;K21573;;	K16089;K21573;	EMPTY	EMPTY	UniRef100_Q8A1G1	Bacteria	Bacteria	unknown	Bacteria	Bacteria	Bacteria	Bacteria	Bacteria	Bacteria	4	0	0	0	0	0	0	0	0	0	0	0	0	0	0	0	0	0	0	0	0	1	2	1	0	0	0	0	0	0	0
Meta-Protein 3224	BLAST_FLAE_VIBAN Probable flagellin E OS=Vibrio anguillarum GN=flaE PE=3 SV=1_Q56570	Bacterial flagellum;Coiled coil;Secreted;Virulence;	;;;	;	;;;	;	UniRef50_Q56572	UniRef90_Q56570	UniRef100_Q56570	Bacteria	Vibrio anguillarum	unknown	Gammaproteobacteria	Vibrionales	Vibrionaceae	Vibrio	Vibrio anguillarum	Vibrio anguillarum	1	1	0	0	0	0	0	0	0	0	0	0	0	0	0	0	0	0	0	0	0	0	0	0	0	0	0	0	0	0	0
Meta-Protein 3923	BLAST_HDRD_METAC CoB--CoM heterodisulfide reductase 2 iron-sulfur subunit D OS=Methanosarcina acetivorans (strain ATCC 35395 / DSM 2834 / JCM 12185 / C2A) GN=hdrD PE=3 SV=1_Q8TSV7	4Fe-4S;Complete proteome;Iron;Iron-sulfur;Metal-binding;Methanogenesis;Oxidoreductase;Reference proteome;Repeat;	;1.8.98.1;;	1.8.98.1;	;K08264;;	K08264;	UniRef50_P96797	UniRef90_Q8TSV7	UniRef100_Q8TSV7	Archaea	Methanosarcina acetivorans C2A	unknown	Methanomicrobia	Methanosarcinales	Methanosarcinaceae	Methanosarcina	Methanosarcina acetivorans	Methanosarcina acetivorans C2A	1	0	0	0	0	0	1	0	0	0	0	0	0	0	0	0	0	0	0	0	0	0	0	0	0	0	0	0	0	0	0
Meta-Protein 3951	Metagenome unknown		;;		;;					Uncategorized	Uncategorized	unknown	Uncategorized	Uncategorized	Uncategorized	Uncategorized	Uncategorized	Uncategorized	1	0	0	0	0	0	1	0	0	0	0	0	0	0	0	0	0	0	0	0	0	0	0	0	0	0	0	0	0	0	0
Meta-Protein 2681	CH602_FRACC 60 kDa chaperonin 2 OS=Frankia casuarinae (strain DSM 45818 / CECT 9043 / CcI3) GN=groL2 PE=3 SV=1	ATP-binding;Chaperone;Complete proteome;Cytoplasm;Nucleotide-binding;Reference proteome;	;;;	;	;K04077;;	K04077;	EMPTY	UniRef90_Q2JAZ7	UniRef100_Q2JAZ7	Bacteria	Bacteria	unknown	Bacteria	Bacteria	Bacteria	Bacteria	Bacteria	Bacteria	3	0	0	0	0	0	0	0	0	0	0	0	0	0	0	0	0	0	0	0	0	0	0	0	0	0	0	0	0	0	0
Meta-Protein 1412	ENO_RHOMI Enolase OS=Rhodotorula mucilaginosa GN=ENO PE=1 SV=1	3D-structure;Allergen;Complete proteome;Cytoplasm;Direct protein sequencing;Glycolysis;Isopeptide bond;Lyase;Magnesium;Metal-binding;Phosphoprotein;Reference proteome;Ubl conjugation;	;4.2.1.11;;	4.2.1.11;	;;K01689;;	;K01689;	UniRef50_Q60173	UniRef90_Q756H2	UniRef100_Q756H2	Eukaryota	Fungi	unknown	Dikarya	Dikarya	Dikarya	Dikarya	Dikarya	Dikarya	122	0	0	0	0	0	0	0	0	0	0	0	0	0	0	0	0	0	0	30	18	1	3	3	25	9	5	7	8	1	7
Meta-Protein 3413	SPO71_YEAST Sporulation-specific protein 71 OS=Saccharomyces cerevisiae (strain ATCC 204508 / S288c) GN=SPO71 PE=3 SV=1	Complete proteome;Reference proteome;Sporulation;	;;;	;	;;;	;	UniRef50_Q03868	UniRef90_Q03868	UniRef100_Q03868	Eukaryota	Fungi	unknown	Saccharomycetes	Saccharomycetales	Saccharomycetaceae	Saccharomyces	Saccharomyces cerevisiae	Saccharomyces cerevisiae S288c	1	0	1	0	0	0	0	0	0	0	0	0	0	0	0	0	0	0	0	0	0	0	0	0	0	0	0	0	0	0	0
Meta-Protein 4988	BLAST_ACSC_MOOTH Corrinoid/iron-sulfur protein large subunit OS=Moorella thermoacetica GN=acsC PE=1 SV=2_Q07340	3D-structure;4Fe-4S;Carbon dioxide fixation;Cobalt;Direct protein sequencing;Iron;Iron-sulfur;Metal-binding;	;;;	;	;;;	;	UniRef50_Q07340	UniRef90_Q07340	UniRef100_Q07340	Bacteria	Moorella thermoacetica	unknown	Clostridia	Thermoanaerobacterales	Thermoanaerobacteraceae	Moorella	Moorella thermoacetica	Moorella thermoacetica	1	0	0	0	0	0	0	0	0	0	0	0	0	0	0	0	0	0	0	0	0	0	0	0	0	0	0	0	0	0	0
Meta-Protein 4721	BLAST_FTHS_BACFN Formate--tetrahydrofolate ligase OS=Bacteroides fragilis (strain ATCC 25285 / DSM 2151 / JCM 11019 / NCTC 9343) GN=fhs PE=3 SV=1_Q5LD60	ATP-binding;Complete proteome;Ligase;Nucleotide-binding;One-carbon metabolism;Reference proteome;	;6.3.4.3;;	6.3.4.3;	;K01938;;	K01938;	UniRef50_P21164	UniRef90_Q8A9S8	UniRef100_Q5LD60	Bacteria	Bacteroides fragilis	unknown	Bacteroidia	Bacteroidales	Bacteroidaceae	Bacteroides	Bacteroides fragilis	Bacteroides fragilis	1	0	0	0	0	0	0	0	0	0	0	0	0	0	0	0	0	0	0	0	0	0	1	0	0	0	0	0	0	0	0
Meta-Protein 3181	Metagenome unknown		;;		;;					Uncategorized	Uncategorized	unknown	Uncategorized	Uncategorized	Uncategorized	Uncategorized	Uncategorized	Uncategorized	1	1	0	0	0	0	0	0	0	0	0	0	0	0	0	0	0	0	0	0	0	0	0	0	0	0	0	0	0	0	0
Meta-Protein 4156	BLAST_Y433_ARCFU Probable S-adenosyl-L-methionine-binding protein AF_0433 OS=Archaeoglobus fulgidus (strain ATCC 49558 / VC-16 / DSM 4304 / JCM 9628 / NBRC 100126) GN=AF_0433 PE=4 SV=1_O29816	Complete proteome;Reference proteome;S-adenosyl-L-methionine;	;;;	;	;K11261;;	K11261;	UniRef50_O29816	UniRef90_O29816	UniRef100_O29816	Archaea	Archaeoglobus fulgidus DSM 4304	unknown	Archaeoglobi	Archaeoglobales	Archaeoglobaceae	Archaeoglobus	Archaeoglobus fulgidus	Archaeoglobus fulgidus DSM 4304	3	0	0	0	0	0	0	0	0	0	2	0	1	0	0	0	0	0	0	0	0	0	0	0	0	0	0	0	0	0	0
Meta-Protein 1171	BLAST_HAGA1_PORGI Hemagglutinin A OS=Porphyromonas gingivalis (strain ATCC BAA-308 / W83) GN=hagA PE=1 SV=1_P59915	3D-structure;Complete proteome;Hemagglutinin;Hydrolase;Protease;Reference proteome;Repeat;Signal;Thiol protease;Virulence;	;;;	;	;;;	;	UniRef50_Q51845	UniRef90_Q51845	UniRef100_P59915	Bacteria	Porphyromonas gingivalis W83	unknown	Bacteroidia	Bacteroidales	Porphyromonadaceae	Porphyromonas	Porphyromonas gingivalis	Porphyromonas gingivalis W83	1	0	0	0	0	0	0	0	0	1	0	0	0	0	0	0	0	0	0	0	0	0	0	0	0	0	0	0	0	0	0
Meta-Protein 3730	BLAST_YFCE_ECOL6 Phosphodiesterase YfcE OS=Escherichia coli O6:H1 (strain CFT073 / ATCC 700928 / UPEC) GN=yfcE PE=3 SV=1_P67096	3D-structure;Complete proteome;Hydrolase;Manganese;Metal-binding;Reference proteome;	;3.1.4.-;;	3.1.4.-;	;K07095;;	K07095;	UniRef50_P67097	UniRef90_P67097	UniRef100_P67097	Bacteria	Escherichia coli	unknown	Gammaproteobacteria	Enterobacteriales	Enterobacteriaceae	Escherichia	Escherichia coli	Escherichia coli	1	0	0	0	1	0	0	0	0	0	0	0	0	0	0	0	0	0	0	0	0	0	0	0	0	0	0	0	0	0	0
Meta-Protein 3664	BLAST_Y1153_PYRAB UPF0098 protein PYRAB11530 OS=Pyrococcus abyssi (strain GE5 / Orsay) GN=PYRAB11530 PE=3 SV=2_Q9UZJ3	Complete proteome;Signal;	;;;	;	;K06910;;	K06910;	UniRef50_Q9UZJ3	UniRef90_Q9UZJ3	UniRef100_Q9UZJ3	Archaea	Pyrococcus abyssi GE5	unknown	Thermococci	Thermococcales	Thermococcaceae	Pyrococcus	Pyrococcus abyssi	Pyrococcus abyssi GE5	1	0	0	0	1	0	0	0	0	0	0	0	0	0	0	0	0	0	0	0	0	0	0	0	0	0	0	0	0	0	0
Meta-Protein 5059	OMP2B_BRUSU Porin Omp2b OS=Brucella suis biovar 1 (strain 1330) GN=omp2b PE=3 SV=1	Cell outer membrane;Complete proteome;Ion transport;Membrane;Porin;Signal;Transmembrane;Transmembrane beta strand;Transport;	;;;	;	;;;	;	UniRef50_Q45330	UniRef90_Q44665	UniRef100_P0DI95	Bacteria	Brucella suis 1330	unknown	Alphaproteobacteria	Rhizobiales	Brucellaceae	Brucella	Brucella suis	Brucella suis 1330	1	0	0	0	0	0	0	0	0	0	0	0	0	0	0	0	0	0	0	0	0	0	0	0	0	0	0	0	0	0	0
Meta-Protein 2633	BLAST_EXAA_PSEAE Quinoprotein ethanol dehydrogenase OS=Pseudomonas aeruginosa (strain ATCC 15692 / DSM 22644 / CIP 104116 / JCM 14847 / LMG 12228 / 1C / PRS 101 / PAO1) GN=exaA PE=1 SV=1_Q9Z4J7	3D-structure;Calcium;Complete proteome;Disulfide bond;Metal-binding;Oxidoreductase;PQQ;Periplasm;Reference proteome;Repeat;Signal;WD repeat;	;1.1.2.8;;	1.1.2.8;	;K00114;;	K00114;	UniRef50_A8R3S4	UniRef90_Q9Z4J7	UniRef100_Q9Z4J7	Bacteria	Pseudomonas	unknown	Gammaproteobacteria	Pseudomonadales	Pseudomonadaceae	Pseudomonas	Pseudomonas	Pseudomonas	27	0	0	0	0	0	0	0	0	0	0	0	0	0	0	0	0	0	0	0	0	0	0	0	0	0	0	0	0	0	0
Meta-Protein 517	BLAST_MTTC2_METMA Trimethylamine corrinoid protein 2 OS=Methanosarcina mazei (strain ATCC BAA-159 / DSM 3647 / Goe1 / Go1 / JCM 11833 / OCM 88) GN=mttC2 PE=3 SV=1_P58983	Cobalt;Complete proteome;Direct protein sequencing;Metal-binding;Methanogenesis;Reference proteome;Repeat;	;;;	;	;;K14084;;	;K14084;	UniRef50_O93659	UniRef90_P58982	EMPTY	Archaea	Methanosarcina	unknown	Methanomicrobia	Methanosarcinales	Methanosarcinaceae	Methanosarcina	Methanosarcina	Methanosarcina	9	2	1	0	0	0	0	1	0	0	2	3	0	0	0	0	0	0	0	0	0	0	0	0	0	0	0	0	0	0	0
Meta-Protein 3344	Metagenome unknown		;;		;;					Uncategorized	Uncategorized	unknown	Uncategorized	Uncategorized	Uncategorized	Uncategorized	Uncategorized	Uncategorized	2	0	1	0	0	0	1	0	0	0	0	0	0	0	0	0	0	0	0	0	0	0	0	0	0	0	0	0	0	0	0
Meta-Protein 4252	RNH2_SALAI Ribonuclease HII OS=Salinispora arenicola (strain CNS-205) GN=rnhB PE=3 SV=1	Complete proteome;Cytoplasm;Endonuclease;Hydrolase;Manganese;Metal-binding;Nuclease;	;3.1.26.4;;	3.1.26.4;	;K03470;;	K03470;	UniRef50_A0QV44	UniRef90_A4X4I2	UniRef100_A8M684	Bacteria	Salinispora arenicola CNS-205	unknown	Actinobacteria	Actinomycetales	Micromonosporaceae	Salinispora	Salinispora arenicola	Salinispora arenicola CNS-205	1	0	0	0	0	0	0	0	0	0	0	1	0	0	0	0	0	0	0	0	0	0	0	0	0	0	0	0	0	0	0
Meta-Protein 2903	Metagenome unknown		;;		;;					Uncategorized	Uncategorized	unknown	Uncategorized	Uncategorized	Uncategorized	Uncategorized	Uncategorized	Uncategorized	6	1	1	1	0	0	0	1	1	1	0	0	0	0	0	0	0	0	0	0	0	0	0	0	0	0	0	0	0	0	0
Meta-Protein 515	BLAST_ZMPB_STRPN Zinc metalloprotease ZmpB OS=Streptococcus pneumoniae serotype 4 (strain ATCC BAA-334 / TIGR4) GN=zmpB PE=3 SV=2_Q9L7Q2	3D-structure;Cell wall;Complete proteome;Direct protein sequencing;Glycosidase;Hydrolase;Lyase;Membrane;Metal-binding;Metalloprotease;Peptidoglycan-anchor;Protease;Reference proteome;Repeat;Secreted;Signal;Toxin;Transmembrane;Transmembrane helix;Virulence;Zinc;	;3.2.1.35;3.4.24.-;4.2.2.25;;	3.2.1.35;3.4.24.-;4.2.2.25;	;K01197;K08643;K20610;;	K01197;K08643;K20610;	UniRef50_P26831	UniRef90_P26831	UniRef100_P26831	Bacteria	Firmicutes	unknown	Firmicutes	Firmicutes	Firmicutes	Firmicutes	Firmicutes	Firmicutes	13	2	2	0	2	3	1	1	1	1	0	0	0	0	0	0	0	0	0	0	0	0	0	0	0	0	0	0	0	0	0
Meta-Protein 1613	BLAST_RL2_BACV8 50S ribosomal protein L2 OS=Bacteroides vulgatus (strain ATCC 8482 / DSM 1447 / JCM 5826 / NBRC 14291 / NCTC 11154) GN=rplB PE=3 SV=1_A6KYJ2	Complete proteome;RNA-binding;Reference proteome;Ribonucleoprotein;Ribosomal protein;rRNA-binding;	;;;	;	;K02886;;	K02886;	UniRef50_P42919	UniRef90_B6YQ82	UniRef100_B6YQ82	Bacteria	Bacteria	unknown	Bacteria	Bacteria	Bacteria	Bacteria	Bacteria	Bacteria	50	0	0	0	0	0	0	0	0	0	0	0	0	0	0	0	0	0	0	2	6	0	9	8	3	4	0	4	0	2	3
Meta-Protein 4595	BLAST_PYRE_BACTN Orotate phosphoribosyltransferase OS=Bacteroides thetaiotaomicron (strain ATCC 29148 / DSM 2079 / NCTC 10582 / E50 / VPI-5482) GN=pyrE PE=3 SV=1_Q8A1D5	Complete proteome;Glycosyltransferase;Magnesium;Pyrimidine biosynthesis;Reference proteome;Transferase;	;2.4.2.10;;	2.4.2.10;	;K00762;;	K00762;	UniRef50_Q8A1D5	UniRef90_Q8A1D5	UniRef100_Q8A1D5	Bacteria	Bacteroides thetaiotaomicron VPI-5482	unknown	Bacteroidia	Bacteroidales	Bacteroidaceae	Bacteroides	Bacteroides thetaiotaomicron	Bacteroides thetaiotaomicron VPI-5482	4	0	0	0	0	0	0	0	0	0	0	0	0	0	0	0	0	0	0	0	0	1	3	0	0	0	0	0	0	0	0
Meta-Protein 3331	BLAST_DHAS_AQUAE Aspartate-semialdehyde dehydrogenase OS=Aquifex aeolicus (strain VF5) GN=asd PE=3 SV=1_O67716	Amino-acid biosynthesis;Complete proteome;Diaminopimelate biosynthesis;Lysine biosynthesis;Methionine biosynthesis;NADP;Oxidoreductase;Reference proteome;Threonine biosynthesis;	;1.2.1.11;;	1.2.1.11;	;K00133;;	K00133;	UniRef50_Q04797	UniRef90_O67716	UniRef100_O67716	Bacteria	Aquifex aeolicus VF5	unknown	Aquificae	Aquificales	Aquificaceae	Aquifex	Aquifex aeolicus	Aquifex aeolicus VF5	1	0	1	0	0	0	0	0	0	0	0	0	0	0	0	0	0	0	0	0	0	0	0	0	0	0	0	0	0	0	0
Meta-Protein 423	BLAST_VATC_METMA V-type ATP synthase subunit C OS=Methanosarcina mazei (strain ATCC BAA-159 / DSM 3647 / Goe1 / Go1 / JCM 11833 / OCM 88) GN=atpC PE=3 SV=1_Q60184	ATP synthesis;Complete proteome;Hydrogen ion transport;Ion transport;Reference proteome;Transport;	;;;	;	;K02119;K02121;;	K02119;K02121;	UniRef50_Q60183	UniRef90_Q60183	UniRef100_Q60183	Archaea	Methanosarcina	unknown	Methanomicrobia	Methanosarcinales	Methanosarcinaceae	Methanosarcina	Methanosarcina	Methanosarcina	55	7	7	5	6	5	1	1	2	2	9	4	5	1	0	0	0	0	0	0	0	0	0	0	0	0	0	0	0	0	0
Meta-Protein 3760	BLAST_TSGCD_HALVD Putative glucose ABC transporter permease protein TsgC13 OS=Haloferax volcanii (strain ATCC 29605 / DSM 3757 / JCM 8879 / NBRC 14742 / NCIMB 2012 / VKM B-1768 / DS2) GN=tsgC13 PE=3 SV=1_D4GPW1	Cell membrane;Complete proteome;Membrane;Plasmid;Reference proteome;Sugar transport;Transmembrane;Transmembrane helix;Transport;	;;;	;	;K02057;;	K02057;	UniRef50_D4GPW1	UniRef90_D4GPW1	UniRef100_D4GPW1	Archaea	Haloferax volcanii DS2	unknown	Halobacteria	Halobacteriales	Halobacteriaceae	Haloferax	Haloferax volcanii	Haloferax volcanii DS2	1	0	0	0	1	0	0	0	0	0	0	0	0	0	0	0	0	0	0	0	0	0	0	0	0	0	0	0	0	0	0
Meta-Protein 5142	BLAST_OMP32_DELAC Outer membrane porin protein 32 OS=Delftia acidovorans GN=omp32 PE=1 SV=1_P24305	3D-structure;Cell outer membrane;Direct protein sequencing;Ion transport;Membrane;Porin;Pyrrolidone carboxylic acid;Signal;Transmembrane;Transmembrane beta strand;Transport;	;;;	;	;;;	;	UniRef50_P24305	UniRef90_P24305	UniRef100_P24305	Bacteria	Delftia acidovorans	unknown	Betaproteobacteria	Burkholderiales	Comamonadaceae	Delftia	Delftia acidovorans	Delftia acidovorans	5	0	0	0	0	0	0	0	0	0	0	0	0	0	0	0	0	0	0	0	0	0	0	0	0	0	0	0	0	0	0
Meta-Protein 3200	BLAST_RECA_RUMA7 Protein RecA OS=Ruminococcus albus (strain ATCC 27210 / DSM 20455 / JCM 14654 / NCDO 2250 / 7) GN=recA PE=3 SV=2_P49985	ATP-binding;Complete proteome;Cytoplasm;DNA damage;DNA recombination;DNA repair;DNA-binding;Nucleotide-binding;Reference proteome;SOS response;	;;;	;	;K03553;;	K03553;	UniRef50_P45383	UniRef90_P49985	UniRef100_P49985	Bacteria	Ruminococcus albus 7	unknown	Clostridia	Clostridiales	Ruminococcaceae	Ruminococcus	Ruminococcus albus	Ruminococcus albus 7	1	1	0	0	0	0	0	0	0	0	0	0	0	0	0	0	0	0	0	0	0	0	0	0	0	0	0	0	0	0	0
Meta-Protein 3424	RENT1_ARATH Regulator of nonsense transcripts 1 homolog OS=Arabidopsis thaliana GN=UPF1 PE=1 SV=2	ATP-binding;Complete proteome;Cytoplasm;Helicase;Hydrolase;Metal-binding;Nonsense-mediated mRNA decay;Nucleotide-binding;Phosphoprotein;Plant defense;Reference proteome;RNA-binding;Zinc;Zinc-finger;	;3.6.4.-;;	3.6.4.-;	;K14326;;	K14326;	UniRef50_Q9FJR0	UniRef90_Q9FJR0	UniRef100_Q9FJR0	Eukaryota	Viridiplantae	unknown	Arabidopsis thaliana	Brassicales	Brassicaceae	Arabidopsis	Arabidopsis thaliana	Arabidopsis thaliana	1	0	1	0	0	0	0	0	0	0	0	0	0	0	0	0	0	0	0	0	0	0	0	0	0	0	0	0	0	0	0
Meta-Protein 1643	BLAST_RL5_CLOK5 50S ribosomal protein L5 OS=Clostridium kluyveri (strain ATCC 8527 / DSM 555 / NCIMB 10680) GN=rplE PE=3 SV=1_A5N4Q9	3D-structure;Chloroplast;Complete proteome;Direct protein sequencing;Organellar chromatophore;Plastid;RNA-binding;Reference proteome;Ribonucleoprotein;Ribosomal protein;Transit peptide;rRNA-binding;tRNA-binding;	;;;	;	;;K02931;;	;K02931;	UniRef50_Q6N4U5	UniRef90_C4ZBT1	UniRef100_C4ZBT1	cellular organisms	cellular organisms	unknown	cellular organisms	cellular organisms	cellular organisms	cellular organisms	cellular organisms	cellular organisms	38	0	0	0	0	0	0	0	0	0	0	0	0	0	0	0	0	0	0	1	0	1	3	1	0	8	8	8	1	0	0
Meta-Protein 800	Metagenome unknown	Cell wall;Direct protein sequencing;Repeat;S-layer;Secreted;Signal;	;;;	;	;;;	;	UniRef50_P49051	UniRef90_Q9ZES5	UniRef100_Q9ZES5	Bacteria	Bacillus thuringiensis serovar finitimus	unknown	Bacilli	Bacillales	Bacillaceae	Bacillus	Bacillus thuringiensis	Bacillus thuringiensis serovar finitimus	106	0	3	0	2	4	18	23	19	17	0	0	0	0	1	0	11	5	3	0	0	0	0	0	0	0	0	0	0	0	0
Meta-Protein 4682	BLAST_RL18_NOVAD 50S ribosomal protein L18 OS=Novosphingobium aromaticivorans (strain ATCC 700278 / DSM 12444 / CIP 105152 / NBRC 16084 / F199) GN=rplR PE=3 SV=1_Q2G8W4	Complete proteome;RNA-binding;Reference proteome;Ribonucleoprotein;Ribosomal protein;rRNA-binding;	;;;	;	;K02881;;	K02881;	UniRef50_C1DKM9	UniRef90_Q2G8W4	UniRef100_Q2G8W4	Bacteria	Novosphingobium aromaticivorans DSM 12444	unknown	Alphaproteobacteria	Sphingomonadales	Sphingomonadaceae	Novosphingobium	Novosphingobium aromaticivorans	Novosphingobium aromaticivorans DSM 12444	2	0	0	0	0	0	0	0	0	0	0	0	0	0	0	0	0	0	0	0	0	0	2	0	0	0	0	0	0	0	0
Meta-Protein 270	BLAST_LUXP_VIBVY Autoinducer 2-binding periplasmic protein LuxP OS=Vibrio vulnificus (strain YJ016) GN=luxP PE=3 SV=1_Q7MD15	3D-structure;Complete proteome;Direct protein sequencing;Periplasm;Reference proteome;Signal;Transport;	;;;	;	;K02058;K10910;;	K02058;K10910;	EMPTY	EMPTY	UniRef100_P39325	Bacteria	Gammaproteobacteria	unknown	Gammaproteobacteria	Gammaproteobacteria	Gammaproteobacteria	Gammaproteobacteria	Gammaproteobacteria	Gammaproteobacteria	124	13	12	11	8	9	3	3	3	5	22	13	11	1	1	1	3	2	3	0	0	0	0	0	0	0	0	0	0	0	0
Meta-Protein 1249	BLAST_6PGD_MOUSE 6-phosphogluconate dehydrogenase, decarboxylating OS=Mus musculus GN=Pgd PE=1 SV=3_Q9DCD0	3D-structure;Acetylation;Alternative splicing;Chloroplast;Complete proteome;Cytoplasm;Direct protein sequencing;Gluconate utilization;NADP;Oxidoreductase;Pentose shunt;Phosphoprotein;Plastid;Polymorphism;Reference proteome;Transit peptide;	;1.1.1.44;;	1.1.1.44;	;;K00033;;	;K00033;	EMPTY	EMPTY	EMPTY	cellular organisms	cellular organisms	unknown	cellular organisms	cellular organisms	cellular organisms	cellular organisms	cellular organisms	cellular organisms	3	0	0	0	0	0	0	0	0	0	2	1	0	0	0	0	0	0	0	0	0	0	0	0	0	0	0	0	0	0	0
[truncated: 4,408 more rows]
[truncated: 24 more columns]

## Sheet: NonRedundant KOs
KO-numbers	Sum (this sheet)	Sum(Output_DATA_COMPARE)	NewWF_BGP_1_A	NewWF_BGP_1_B	NewWF_BGP_1_C	NewWF_BGP_2_A	NewWF_BGP_2_B	NewWF_BGP_2_C	NewWF_BGP_3_A	NewWF_BGP_3_B	NewWF_BGP_3_C	OldWF_BGP_1_A	OldWF_BGP_1_B	OldWF_BGP_1_C	OldWF_BGP_2_B	OldWF_BGP_2_C	OldWF_BGP_2_A	OldWF_BGP_3_A	OldWF_BGP_3_B	OldWF_BGP_3_C	NewWF_Hgut_1_A	NewWF_Hgut_1_B	NewWF_Hgut_1_C	NewWF_Hgut_2_A	NewWF_Hgut_2_B	NewWF_Hgut_2_C	NewWF_Hgut_3_A	NewWF_Hgut_3_B	NewWF_Hgut_3_C	OldWF_Hgut_1_A	OldWF_Hgut_1_B	OldWF_Hgut_1_C	OldWF_Hgut_2_A	OldWF_Hgut_2_B	OldWF_Hgut_2_C	OldWF_Hgut_3_A	OldWF_Hgut_3_B	OldWF_Hgut_3_C	NewWF_Soil_A	NewWF_Soil_B	NewWF_Soil_C	NewWF_Compost_A	NewWF_Compost_B	NewWF_Compost_C	OldWF_Soil_A	OldWF_Soil_B	OldWF_Soil_C	OldWF_Compost_A	OldWF_Compost_B
[truncated: 1,516 more rows]
[truncated: 7 more columns]

[truncated: 2 more sheets: NonRedundant_ECs, Summary Figure]
